# Supplementary material
Source: PubMed Central journal article supplement (PMC5877943)
Supplement: pnas.201721117SI.pdf [file pnas.201721117SI.pdf]

# Supporting Information

Altindis et al. 10.1073/pnas.1721117115

## SI Methods

**Bioinformatics.** The viral genome database (<https://www.ncbi.nlm.nih.gov/genome/viruses>) was downloaded from the NCBI and was searched for the hormone peptide sequences reported in Table S1 with a threshold  $e$ -value  $\leq 0.1$  using tBLASTn (50). This yielded the data in Tables S2 and S3. An additional bioinformatics search was performed by BLASTp using the A-chain or B-chain of insulin, IGF1, and IGF2 as query sequences against viral proteomes (NCBI taxonomic ID: 10239). This uncovered GIV VILP presented in this paper, which had not been identified in the original search because the GIV genome was not included in the NCBI viral genome database. The whole protein sequence of each significant hit was compared with insulin, IGF1, and IGF2 using a multiple sequence alignment program (Clustal Omega) to determine the positions of the cysteines and the number of the identical and conserved residues. Sequence alignment was used to predict domain structures of the VILPs, and I-TASSER was used to predict 3D structures (18). SignalP was used to predict the possible signal peptides of the VILPs ([www.cbs.dtu.dk/services/SignalP/](http://www.cbs.dtu.dk/services/SignalP/)).

Residues involved in IR and IGF1R binding were added using the CCP4 Molecular Graphics program ([www.ccp4.ac.uk/MG/](http://www.ccp4.ac.uk/MG/)). Crystal structures of human insulin [Protein Data Bank (PDB) ID code 1MSO] and hIGF1R (PDB ID code 1GZR) and I-TASSER-predicted structures of the VILPs were used in this analysis. The two arginines at positions 36 and 37 in the IGF1 molecule are missing from the crystal structure and were inserted manually. An evolutionary tree was constructed using sequences of 30 different insulin, IGF1, and IGF2 sequences and the four VILPs obtained from UniProt (Table S4). After the multiple sequence alignment of these sequences, the alignment file was utilized for the production of a neighbor-joining phylogenetic tree without distance corrections using Clustal Omega (<https://www.ebi.ac.uk/Tools/msa/clustalo/>).

The sequences identified in the previously published enteric virome/microbiome analysis were used to make a blast database. SGIV, GIV, LCDV-Sa, and LCDV-1 genomes were used as queries for search against the library using the BLASTn program to determine if these viruses are present in these samples. The significant hits obtained from the virome/microbiome study for VILP-carrying viruses were explored a second time to determine their specificity to these viruses and to show they are not found in any other species. The significant DNA reads were retrieved from the previous BLAST databases result and were used as queries to run BLASTn on the NCBI nonredundant database. The sequences reported in this study are the ones that are 100% specific to these viruses. The code for these database searches is available at <https://github.com/jdrejf/viral-insulin-peptides>.

**Peptide Synthesis and Folding.** The single-chain viral insulins were assembled on 0.1 mmol Rink amide ChemMatrix (PCAS BioMatrix Inc.) resin using an ABI 433A peptide synthesizer and Fmoc/6-Cl-HOBt/ $N,N'$ -diisopropylcarbodiimide coupling protocols. Fmoc-Asp-OtBu was employed to introduce the C-terminal Asn. Cleavage was conducted by treatment with 10 mL of trifluoroacetic acid (TFA) solution containing 2.5% triisopropylsilane, 2.5% 2-mercaptoethanol, 2.5% anisole, and 2.5% H<sub>2</sub>O at room temperature with gentle agitation for 2 h. The resin was filtered, and the peptide was precipitated by the addition of cold ether (50 mL). The precipitate was collected by centrifugation and then was washed with cold ether (3 × 50 mL). The crude peptide was dissolved in 20 mM alkaline glycine buffer (500 mL) followed with the addition of solid cysteine-HCl (0.75 mmol). The pH of

the solution was adjusted to 10.5 with 1 M NaOH. Sonication was used to accelerate the dissolution of the crude peptide. The resulting solution was stirred vigorously at 4 °C for 2 d. The pH was lowered to 7.0 by the addition of 1 M HCl, and the solution was subjected to purification by preparative reverse-phase HPLC column [Luna 10- $\mu$ m C8 100 Å, LC column (Phenomenex Inc.), 250 × 21.2 mm, 10–50% aqueous acetonitrile (0.1% TFA) over 90 min, at a flow rate of 15 mL/min]. The results were assessed by analytical LC-MS. The pooled fractions were lyophilized to provide the single-chain viral insulin as a white fluffy solid.

**Receptor Competition Assays.** Murine brown preadipocyte cell lines with double knockout of the endogenous IR and IGF1R were stably transfected with either hIR-B or hIGF1R, as previously described (25), and were grown to confluence in 48-well plates and were serum-starved overnight. After washing with PBS, cells were incubated in a HEPES binding buffer containing <sup>125</sup>I-IGF1 (2.5 nM) for hIGF1R-binding experiments or <sup>125</sup>I-insulin (1 nM) for IR-binding experiments and increasing concentrations of the unlabeled ligands for 2 h at room temperature. Binding competition was performed in triplicate for each dose. After washing, cells were solubilized with 0.1 M NaOH containing 0.1% SDS, and radioactivity was measured using a gamma-counter. The data were plotted as the percentage of the maximal binding of the ligand alone and were expressed as mean ± SEM.

**IR and IGF1R Phosphorylation.** HEK293 cells (ATCC CRL-1573) overexpressing hIR-A, hIR-B, or hIGF1R were plated in 96-well plates and were cultured in DMEM supplemented with 100 IU/mL penicillin, 100  $\mu$ g/mL streptomycin, 10 mM HEPES, and 0.25% bovine growth serum (HyClone SH30541) for 16–20 h at 37 °C, 5% CO<sub>2</sub>, and 90% humidity. Serial dilutions of recombinant human insulin, IGF1, and test peptides were prepared in DMEM supplemented with 0.5% BSA and were added to the wells. After 15 min incubation at 37 °C in humidified atmosphere with 5% CO<sub>2</sub>, the cells were fixed with 5% paraformaldehyde for 20 min at room temperature, washed twice with PBS (pH 7.4), and blocked with 2% BSA in PBS for 1 h. The plate was washed three times, filled with HRP-conjugated antibody against phosphotyrosine (#16-105; Upstate Biotechnology), and incubated for 3 h at room temperature, after which the plate was washed four times, and 0.1 mL of TMB One-Solution substrate (#00-2023; Invitrogen) was added to each well. Color development was stopped 5 min later by adding 0.05 mL 1 M HCl. Absorbance at 450 nm was measured on a Titertek Multiskan MCC340 microplate reader (Thermo Fisher). Absorbance vs. peptide concentration dose–response curves were plotted, and EC<sub>50</sub> values were determined using logistic nonlinear three-parameter regression in GraphPad Prism 6 (GraphPad Software).

**Insulin Signaling and Immunoblotting.** All cells were maintained in DMEM supplemented with 10% FBS, 100 U/mL penicillin, and 100  $\mu$ g/mL streptomycin (Gibco) and were cultured at 37 °C in a humidified atmosphere of 5% CO<sub>2</sub>. Cells expressing hIR-B, hIR-A, hIGF1R, and mIGF1R were serum-starved for 4 h with DMEM containing 0.1% BSA and were stimulated with insulin, IGF1, or VILPs at the indicated concentrations for 15 or 60 min as indicated in Fig. 2 F and H and Fig. S4. To stop the experiments, cells were washed with ice-cold PBS and were lysed with RIPA lysis buffer (Millipore) complemented with 50 mM

potassium fluoride, 50 mM  $\beta$ -glycerolphosphate, 2 mM EGTA (pH 8), 1 mM  $\text{Na}_3\text{VO}_4$ , and 1 $\times$  protease inhibitor mixture (Calbiochem). Protein concentrations were determined using the Pierce 660 nm Protein Assay Reagent (Bio-Rad). Lysates (10–20  $\mu\text{g}$ ) were resolved on SDS/PAGE gels and were transferred to PVDF membrane for immunoblotting. Membranes were blocked in Starting Block T20 (Thermo Fisher) at room temperature for 1 h, were incubated with the indicated primary antibody in Starting Block T20 solution overnight at 4 °C (Figs. 2 and 3 and Fig. S4), and then were washed three times with 1 $\times$  PBS and Tween-20 and incubated with HRP-conjugated secondary antibody (1:20,000; anti-mouse IgG, NA931; anti-rabbit IgG, NA934; GE Healthcare) in Starting Block T20 for 1 h. Signals were detected using Immobilon Western Chemiluminescent HRP Substrate (Millipore). Antibodies against phospho-IR/IGF1R (1:500; #3024), IR $\beta$  (1:500; sc-711), phospho-ERK1/2 (T202/Y204) (1:1,000; #9101), ERK1/2 (1:1,000; #9102), phospho-Akt (S473) (1:1,000; #9271), and Akt (1:1,000; #4685) were purchased from Cell Signaling Technologies. IR $\beta$  antibody (1:500; sc-711) was purchased from Santa Cruz. Human insulin was purchased from Sigma, and hIGF1 was purchased from PeproTech. Densitometric analyses of membranes were performed using ImageJ.

**Plasmid Transfections.** The cDNA sequence of the LCDV-1 VILP gene (240 bp, whole sequence) was synthesized by Integrated DNA Technologies, Inc. and was subcloned into 3 $\times$ Flag-CMV-10 mammalian expression vector (Sigma). For transfection, AML-12 (mouse hepatocyte cell line; ATCC) cells were plated at  $5 \times 10^4$  cells per well and were transfected using 1  $\mu\text{L}$  of Lipofectamine 3000 and 0.5  $\mu\text{g}$  DNA for 0.3 mL medium in each well per the manufacturer's instructions. For signaling experiments of LCDV-1 VILP-transfected cells, the culture medium was replaced 12 h after the transfections with starvation medium (DMEM containing 0.1% BSA), and cells were incubated for an additional 24 h.

**DNA Synthesis and Proliferation.** GM00409 human fibroblasts (Coriell Institute) were plated in 24-well plates at  $5 \times 10^4$  cells per well in 500  $\mu\text{L}$  DMEM supplemented with 10% FBS, 100 U/mL penicillin, and 100  $\mu\text{g}/\text{mL}$  streptomycin (Gibco) and were cultured at 37 °C in a humidified atmosphere of 5%  $\text{CO}_2$ . After 24-h incubation, the cells were serum-starved for 24 h with DMEM containing 0.1% BSA, after which 1  $\mu\text{Ci}$  [ $^3\text{H}$ ]-thymidine (Perkin-Elmer) was added to each well along with the indicated concentrations of ligands, all in triplicate. Experiments were stopped after 24 h, and the wells were washed with PBS. Cells were fixed

by the addition of 10% trichloroacetic acid (TCA) for 10 min and were incubated at  $-20$  °C. The plates were washed one more time with 10% TCA and were lysed in 0.1 M NaOH, followed by liquid scintillation counting.

For transfected AML-12 cells, a related protocol was used. Twelve hours after transfection, cells were serum-starved for 3 h with DMEM containing 0.1% BSA, and 1  $\mu\text{Ci}$  [ $^3\text{H}$ ]-thymidine was added. The experiment was stopped after 6 h of incubation with thymidine.

**Cell Culture and Glucose Uptake.** 3T3-L1 cells were differentiated as described previously (51). For 2-deoxyglucose uptake, cells were washed with PBS and incubated in starvation medium (low-glucose DMEM + 0.5% FBS) at 37 °C. After 3-h incubation, cells were washed again with PBS, and 0.45 mL of Krebs–Ringer Hepes buffer (KRBH) was added with the indicated concentrations of insulin, IGF1, or different viral insulins for 30 min at 37 °C. One microcurie of [ $^{14}\text{C}$ ] 2-deoxyglucose (Sigma) in 50  $\mu\text{L}$  KRBH was added to each well for the final 5 min of stimulation. Glucose uptake was stopped by adding 50  $\mu\text{L}$  of 200 mM 2-deoxyglucose. Cells were washed with PBS and were lysed with lysis buffer (0.1% SDS in PBS) followed by liquid scintillation counting. For Fig. 4A, results of two experiments were combined.

**Insulin Tolerance Test.** All animal studies complied with the regulations and ethics guidelines of the NIH and were approved by the Institutional Animal Care and Use Committees of the Joslin Diabetes Center (no. 97-05) and Harvard Medical School (no. 05131). I.p. insulin tolerance testing was performed after a 4-h fast using 9-wk-old male C57BL/6J mice (Jackson Laboratory). Mice were injected i.p. with LCDV-1 VILP (1  $\mu\text{mol}/\text{kg}$ ;  $n = 4$ ), SGIV VILP (1  $\mu\text{mol}/\text{kg}$ ;  $n = 4$ ), insulin [Humulin, 6 nmol/kg (1.0 U/kg);  $n = 6$ ], or 200  $\mu\text{L}$  of saline ( $n = 6$ ). Tail-vein blood glucose was measured at the indicated time points (Fig. 4B) using an Infinity glucometer (US Diagnostics Inc.). Statistical analysis was by two-way ANOVA followed by Tukey correction;  $*P < 0.05$ ;  $**P < 0.01$ ,  $****P < 0.0001$ .

**Data and Code Availability.** The VILP structures were predicted using I-TASSER (<https://zhanglab.ccmb.med.umich.edu/I-TASSER/>). All the data used in this study, including PDB files and all the original codes that support the bioinformatics analysis in this study have been deposited with GitHub, <https://github.com/jdreyf/viral-insulin-peptides>.







### A LC-MS profile of purified single-chain SGIV VILP

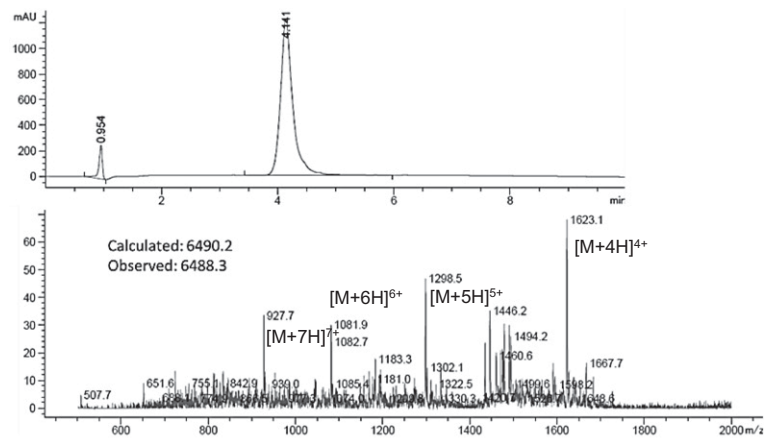

### B LC-MS profile of purified single-chain GIV VILP

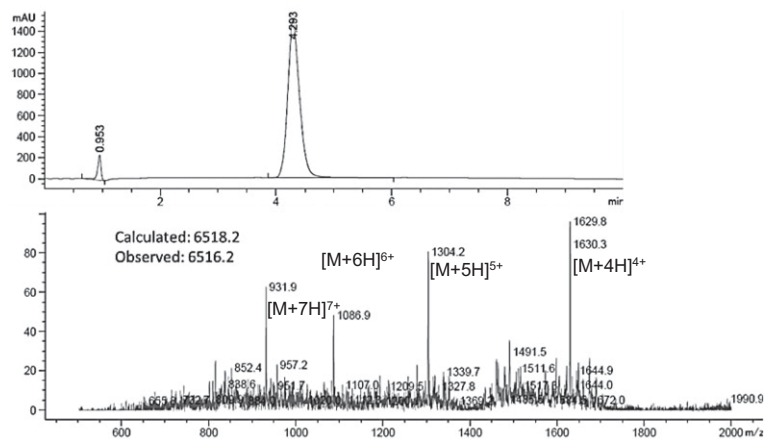

### C LC-MS profile of purified single-chain LCDV-1 VILP

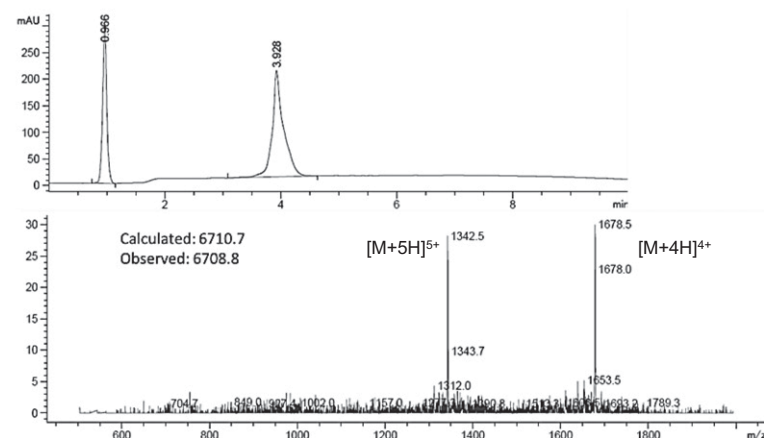

**Fig. S3.** LC-MS profile of purified single-chain VILPs. Each panel shows the LC-MS profile of a purified VILP. (A) SGIV. The single-chain peptide eluted at 4.141 min as a single peak. A mass of 6,488.3 was found for the peptide, consistent with the calculated molecular weight of 6,490.2. (B) GIV. The single-chain peptide eluted at 4.293 min as a single peak. A mass of 6,518.2 was found for the material, consistent with the calculated molecular weight of 6,516.2. (C) LCDV-1. The single-chain peptide eluted at 3.928 min as a single peak. A mass of 6,710.7 was found for the material, consistent with the calculated molecular weight of 6,708.8.

**A Human IGF-1 Receptor**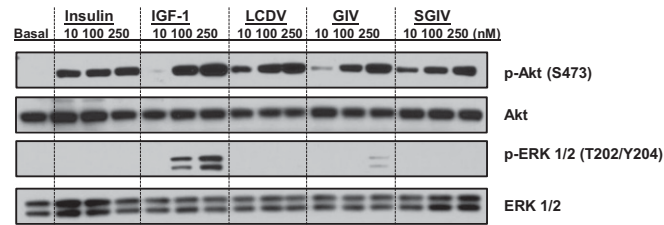**B Human Insulin Receptor-B**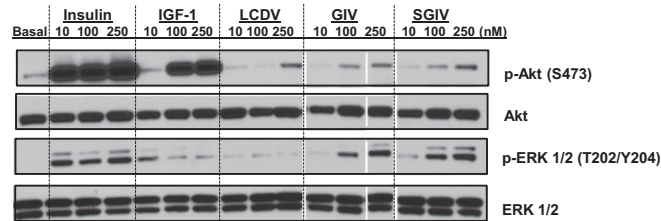

**Fig. 54.** SGIV and GIV stimulate a late postreceptor signaling response. (A) Immunoblotting of protein phosphorylation in lysates from hIGF1R-overexpressing cells stimulated with insulin, IGF1, or VILPs for 60 min. (B) Immunoblotting of protein phosphorylation in lysates from hIR-overexpressing cells stimulated with insulin, IGF1, or VILPs for 60 min. Because of an error in the loading order for the different concentrations of GIV, the image showing stimulation in cells overexpressing hIR has been cut and rearranged to indicate a dose–response similar to other analogs. The areas of cutting are indicated by the vertical white lines in the figure.

**Table S1.** SignalP-predicted signal peptide positions of the VILPs

| VILP source  | Signal peptide | Cleavage site position      | Residues |
|--------------|----------------|-----------------------------|----------|
| SGIV VILP    | Yes            | Between positions 20 and 21 | THQ-LQ   |
| GIV VILP     | Yes            | Between positions 20 and 21 | TYQ-LQ   |
| LCDV-1 VILP  | Yes            | Between positions 19 and 20 | ITA-EI   |
| LCDV-Sa VILP | Yes            | Between positions 20 and 21 | ILC-QT   |

**Table S2.** hIR-binding site 1 and corresponding residues on hIGF1 and VILPs

| hIR-binding site 1 | Human insulin | Ala mutation, K% | hIGF1         | GIV           | SGIV          | LCDV-1        | LCDV-Sa       |
|--------------------|---------------|------------------|---------------|---------------|---------------|---------------|---------------|
| B8                 | GLY           | 0.8              | GLY 7         | GLY 8         | GLY 8         | <u>SER 8</u>  | GLY 8         |
| B9                 | SER           | 72               | <u>ALA 8</u>  | <u>GLY 9</u>  | <u>GLY 9</u>  | <u>ALA 9</u>  | SER 9         |
| B11                | LEU           | 3                | LEU 10        | LEU 11        | LEU 11        | LEU 11        | LEU 11        |
| B12                | VAL           | 1                | VAL 11        | ILE 12        | ILE 12        | VAL 12        | VAL 12        |
| B16                | TYR           | 34               | <u>GLN 15</u> | <u>THR 16</u> | <u>THR 16</u> | <u>GLN16</u>  | <u>GLU 16</u> |
| B24                | PHE           | 5                | <u>PHE 23</u> | <u>VAL 24</u> | <u>VAL 24</u> | <u>VAL 24</u> | <u>GLY 24</u> |
| B25                | PHE           | 10               | TYR 24        | TYR 25        | TYR 25        | TYR 25        | <u>THR 25</u> |
| B26                | TYR           | 100              | PHE 25        | <u>THR 26</u> | <u>THR 26</u> | <u>ARG 26</u> | TYR 26        |
| A1                 | GLY           | 12               | GLY 42        | <u>GLY 38</u> | <u>GLY 38</u> | <u>GLY 41</u> | <u>LYS 41</u> |
| A2                 | ILE           | 0.6              | ILE 43        | LEU 39        | LEU 39        | ILE 42        | ILE 42        |
| A3                 | VAL           | 1.8              | VAL 44        | <u>ALA 40</u> | <u>ALA 40</u> | <u>ALA 43</u> | VAL 43        |
| A4                 | GLU           | 142              | ASP 45        | <u>ASP 41</u> | <u>ASP 41</u> | <u>THR 44</u> | ASP 44        |
| A19                | TYR           | <0.1             | TYR 60        | TYR 56        | TYR 56        | TYR 60        | TYR 60        |
| A21                | ASN           | 63               | <u>ALA 62</u> | ASN 58        | ASN 58        | ASN 62        | ASN 62        |

Column 3 shows the effect of alanine ligand mutations on the hIR-binding affinity (from ref. 14 and references therein). Residue numbering is according to the corresponding PDB ID codes. Underlined residues are neither conserved nor conservatively substituted.

**Table S3. hIR-binding site 2 and corresponding residues on hIGF1 and VILPs**

| hIR-binding site 2 | Human insulin | Ala mutation, K% | hIGF-1        | GIV           | SGIV          | LCDV-1        | LCDV-5a       |
|--------------------|---------------|------------------|---------------|---------------|---------------|---------------|---------------|
| B10                | HIS           | 37               | GLU 9         | GLU 10        | GLU 10        | HIS 10        | GLU 10        |
| B13                | GLU           | 10               | ASP 12        | ASP 13        | ASP 13        | <u>ALA 13</u> | ASP 13        |
| B17                | LEU           | 23               | PHE 16        | <u>GLU 17</u> | <u>GLU 17</u> | <u>ARG 17</u> | LEU 17        |
| A8                 | THR           | 40               | PHE 49        | LYS 45        | LYS 45        | THR 48        | THR 48        |
| A10                | ILE           | 20               | <u>SER 51</u> | <u>GLU 47</u> | <u>GLU 47</u> | <u>GLY 51</u> | <u>GLY 51</u> |
| A12                | SER           | 36               | <u>ASP 53</u> | <u>ASP 49</u> | <u>ASP 49</u> | THR 53        | <u>ASN 53</u> |
| A13                | LEU           | 15               | LEU 54        | <u>GLU 50</u> | <u>GLU 50</u> | THR 54        | TYR 54        |
| A17                | GLU           | 35               | GLU 58        | ASP 54        | ASP 54        | GLU 58        | <u>LYS 58</u> |

Column 3 shows the effect of alanine ligand mutations on the hIR-binding affinity (from ref. 14 and references therein). Residue numbering is according to the corresponding PDB ID codes. Underlined residues are neither conserved nor conservatively substituted.

**Table S4. hIGF1R-binding site 1 residues and corresponding residues on human insulin and VILPs**

| hIGF1R-binding site 1 | Ala mutation, K% | Insulin        | GIV           | SGIV          | LCDV-1        | LCDV-5a       |
|-----------------------|------------------|----------------|---------------|---------------|---------------|---------------|
| GLY 7                 |                  | GLY B8         | GLY 8         | GLY 8         | <u>SER 8</u>  | GLY 8         |
| ALA 8                 |                  | <u>SER B9</u>  | <u>GLY 9</u>  | <u>GLY 9</u>  | ALA 9         | <u>SER 9</u>  |
| VAL 11                | 40               | VAL B12        | ILE 12        | ILE 12        | VAL 12        | VAL 12        |
| ASP 20                |                  | GLU B21        | ASP 21        | ASP 21        | <u>ASN 21</u> | GLU 21        |
| GLY 22                |                  | GLY B23        | GLY 23        | GLY 23        | GLY 23        | GLY 23        |
| PHE 23                |                  | PHE B24        | <u>VAL 24</u> | <u>VAL 24</u> | <u>VAL 24</u> | <u>GLY 24</u> |
| TYR 24                |                  | PHE B25        | TYR 25        | TYR 25        | TYR 25        | <u>THR 25</u> |
| PHE 25                |                  | TYR B26        | <u>THR 26</u> | <u>THR 26</u> | <u>ARG 26</u> | TYR 26        |
| TYR 31                | 17               | -              | <u>GLY 31</u> | <u>GLY 31</u> | <u>ARG 31</u> | <u>ALA 31</u> |
| ARG 36                | 7 (36 + 37)      | -              | ARG 32        | ARG 32        | ARG 32        | LYS 34        |
| ARG 37                |                  | -              | ARG 33        | ARG 33        | ARG 33        | LYS 35        |
| GLY 42                |                  | GLY A1         | GLY 38        | GLY 38        | GLY 41        | <u>LYS 41</u> |
| ILE 43                |                  | ILE A2         | LEU 39        | LEU 39        | ILE 42        | ILE 42        |
| VAL 44                |                  | VAL A3         | <u>ALA 40</u> | <u>ALA 40</u> | <u>ALA 43</u> | VAL 43        |
| ASP 45                |                  | GLU A4         | ASP 41        | ASP 41        | <u>THR 44</u> | ASP 44        |
| MET 59                |                  | <u>ASN A18</u> | <u>ARG 55</u> | <u>ARG 55</u> | LYS 59        | <u>ASN 59</u> |
| TYR 60                |                  | TYR A19        | TYR 56        | TYR 56        | TYR 60        | TYR 60        |

Column 2 shows the effect of alanine ligand mutations on the IGF-1R affinity (from refs. 15 and 16 and references therein). Residue numbering is according to the corresponding PDB ID codes. Underlined residues are neither conserved nor conservatively substituted. The affinity of alanine mutation at residues 36 and 37 is a combined mutation at both sites.

**Table S5. hIGF1R-binding site 2 residues and corresponding residues on human insulin and VILPs**

| hIGF1R-binding site 2 | Ala mutation, K% | Insulin        | GIV           | SGIV          | LCDV-1        | LCDV-5a       |
|-----------------------|------------------|----------------|---------------|---------------|---------------|---------------|
| GLU 9                 | 34               | HIS B10        | GLU 10        | GLU 10        | HIS 10        | GLU 10        |
| ASP 12                | 29               | GLU B13        | ASP 13        | ASP 13        | <u>ALA 13</u> | ASP 13        |
| PHE 16                | 50               | <u>LEU B17</u> | <u>GLU 17</u> | <u>GLU 17</u> | <u>ARG 17</u> | <u>LEU 17</u> |
| LEU 54                | 24               | LEU A13        | <u>GLU 52</u> | <u>GLU 52</u> | <u>THR 53</u> | <u>TYR 53</u> |
| GLU 58                | 15               | GLU A17        | ASP 54        | ASP 54        | GLU 58        | <u>LYS 58</u> |

Column 2 shows the effect of alanine ligand mutations on the IGF-1R affinity (from refs. 15 and 16 and references therein). Residue numbering is according to the corresponding PDB ID codes. Underlined residues are neither conserved nor conservatively substituted. The affinity of alanine mutation at residues 36 and 37 is a combined mutation at both sites.

**Table S6. Insulin, IGF1, IGF2, and VILP sequences used to produce the Clustal Omega phylogenetic tree**

| VILP source                           | Sequence                                                                                                                                                                                                                                                                                                                        |
|---------------------------------------|---------------------------------------------------------------------------------------------------------------------------------------------------------------------------------------------------------------------------------------------------------------------------------------------------------------------------------|
| Human insulin                         | MALWMRLPLLLALLLWGPDPAAAFVNQHLGSHLVEALYLVCGERGFFYTPKTRREAED<br>LQVGVVELGGGPGAGSLQPLALEGSLQKRGIVEQCCTSIICSLYQLENYCN                                                                                                                                                                                                               |
| Human IGF1                            | MGKISSLPTQLFKCCFCDFLKVMMHTMSSSHLFYLALCLLFTTSSATAGPETLCGAEIVD<br>ALQFVCGDRGFYFNKPTGYGSSRRAPQGTGIVDECCFRSCDLRRLREMYCAPLKPASARS<br>VRAQRHTDMPKTQKYQPPSTNKNTKSQRKGGWPKTHPGGEQKEGTEASLQIRGKKKEQRR<br>EIGSRNAECRGGKKG                                                                                                                 |
| Human IGF2                            | MGI PMGKSMVLVLLTFLAFASCCIAAYRPSETLCGGELVDTLQFVCGDRGFYFSRPASRVS<br>RRSRGIVEECCFRSCDLALLETYCATPAKSERDVSTPPTVLPDNFPRYPVGGKFFQYDWTW<br>QSTQRLRRGLPALLRARRGHVLAKELEAFREAKRHRPLIALPTQDPAHGGAPPEMASNRK<br>MAVWIQAGALLFLAVSSVNNANAGAPQHLGSHLVDALYLVCGPTGFFYNPKRDVDPPLG<br>FLPPKSAQETEVAADFADKHAENVIRKRGIVEQCCHKPCSIFELQNYCN             |
| <i>Cyprinus carpio</i> insulin        | KCTMRCLSCHTLSLVLCVLALT PATLEAGPETLCGAEIVD TLQFVCGDRGFYFSKPTGY<br>GPSRRSHNRGIVDECCFQSCLELRREMYCAPVKPGKTPRSVRAQRHTDSERTAKKPLPG<br>QSHSSYKEVHQKNS                                                                                                                                                                                  |
| <i>Cyprinus carpio</i> IGF1           | MEDQLKHHSLCHTCLRTDSVINKVIKMYWIRMPICILFLTLSAFEVASAETLCGGELVD<br>ALQFVCGDRGFYFSRPTSRSSRRSQNRGIVEECCFNCSNLALLEQYCAKPAKSERDVS<br>TSLQVIVPMP TLKQEVPRKHVTVKYSKYDMWQRKAAQRLRRGVPAILRAKKFRRQAERIR<br>AQEQ LHHHRPLITLPSKLPPI LFAQSR                                                                                                     |
| <i>Cyprinus carpio</i> IGF2           | MAALWLHSVSLVLLVLSLVPASSQAMAPPQHLCGAHLVDALYLVCGERGFFYTPKRDVDP<br>LLGFLPPKSGGAAAGGENEVAEFAFKDQMEMMVKRGIVEQCCHKPCNI FDLQNYCN<br>MSSALSFWHLCDVFKSAMCCISCSHTLSLLCVLTLTPTATGAGPETLCGAEIVD TLQF<br>VCGERGFYFSKPTGYGNARRSRGIVDECCFQSCLELRREMYCAPAKTSKAARSVRAQRH<br>TDMPRAPKVVSTAGHKVDKGTERRTAQQPDKTKNKRPLPGHSHTHALLFMRQSLLTFCV<br>GIVCE |
| <i>Paralichthys olivaceus</i> insulin | METQKRHGQHS LCHTCRRAESSRLKVKMSSSSRALLFALALTYLVVEMASAETLCGGEL<br>VDALQFVCE DRGFYFSRPTSRGNSRRPQNRGIVEECCFRSCDLNALLEQYCAKPAKSERDV<br>SATSLQVIVPMPALQEVPRKHVTVKYSKYEVWQRKAAQRLRRGVPAILRAKKFRRQAE<br>KIKAQEQAI FHRPLISLPSKLPVLLATDNYVNNH                                                                                             |
| <i>Paralichthys olivaceus</i> IGF1    | MALLVHFLPLLALLALWE PKPTQAFVKQHLGPHLVEALYLVCGERGFFYTPKSRREVED<br>PQVEQLELGGSPGDLQTLALEVARQKRGIVDQCCTSIICSLYQLENYCN                                                                                                                                                                                                               |
| <i>Paralichthys olivaceus</i> IGF2    | MALWMRFLPLLALLFLWESHPTQAFVKQHLGSHLVEALYLVCGERGFFYTPMSRREVED<br>PQVAQLELGGGPGAGDLQTLALEVAQKRGIVDQCCTSIICSLYQLENYCN                                                                                                                                                                                                               |
| <i>Mus musculus</i> insulin 1         | MGKISSLPTQLFKICLDFLKIHIHSSSHLFYLALCLLFTTSSATAGPETLCGAEIVD<br>ALQFVCGPRGFYFNKPTGYGSSIRRAPQGTGIVDECCFRSCDLRRLREMYCAPLKPTKAARS<br>IRAQRHTDMPKTQKEVHLKNTSRGAGNKTYRM                                                                                                                                                                 |
| <i>Mus musculus</i> insulin2          | MGI PVGKSMVLVLLISLAFALCCIAAYGPGETLCGGELVDTLQFVCSDRGFYFSRPSRRAN<br>RRSRGIVEECCFRSCDLALLETYCATPAKSERDVSTSQAVLPDDFPRYPVGGKFFQYDWTW<br>QSAGRLRRGLPALLRARRGRMLAKELEFREAKRHRPLIVLPKDPAHGGASSEMSNNHQ<br>MALWIRSLPLLALLVFSGPGTSYAAANQHLGSHLVEALYLVCGERGFFYSPKARRDVEQ<br>PLVSSPLRGEAGVLPFQQEYEVKVRGIVEQCCHNTCSLYQLENYCN                  |
| <i>Mus musculus</i> IGF1              | MEKINSLSTQLVKCCFCDFLKVMMHTVSYIHFFYLGLCLLTLTSSAAAGPETLCGAEIVD<br>ALQFVCGDRGFYFSKPTGYGSSRRLHHKGI VDECCFQSCDLRRLREMYCAPIKPPKSARS<br>VRAQRHTDMPKAQKEVHLKNTSRGNTGNRNRYM                                                                                                                                                              |
| <i>Mus musculus</i> IGF2              | MEKINSLSTQLVKCCFCDFLKVMMHTVSYIHFFYLGLCLLTLTSSAAAGPETLCGAEIVD<br>ALQFVCGDRGFYFSKPTGYGSSRRLHHKGI VDECCFQSCDLRRLREMYCAPIKPPKSARS<br>VRAQRHTDMPKAQKEVHLKNTSRGNTGNRNRYM                                                                                                                                                              |
| <i>Gallus gallus</i> insulin          | MALWILSPLLLALLALSGPXTSHAAATQHLGSHLVEALYLVCGERGFFYSPKARRDVEQ<br>PLVSGRLHGEVGLPFQPEEFQVKRGIVEQCCHNTCSLYQLENYCN                                                                                                                                                                                                                    |
| <i>Gallus gallus</i> IGF1             | MEKINSLSTQLVKCCFCDFLKVMMHTVSYIHFFYLGLCLLTLTSSAAAGPETLCGAEIVD<br>ALQFVCGDRGFYFSKPTGYGSSRRLHHKGI VDECCFQSCDLRRLREMYCAPIKPPKSARS<br>VRAQRHTDMPKAQKEVHLKNTSRGNTGNRNRYM                                                                                                                                                              |
| <i>Gallus gallus</i> IGF2             | MEKINSLSTQLVKCCFCDFLKVMMHTVSYIHFFYLGLCLLTLTSSAAAGPETLCGAEIVD<br>ALQFVCGDRGFYFSKPTGYGSSRRLHHKGI VDECCFQSCDLRRLREMYCAPIKPPKSARS<br>VRAQRHTDMPKAQKEVHLKNTSRGNTGNRNRYM                                                                                                                                                              |
| <i>Amazona aestiva</i> insulin        | MSSAGAHTDERCQPAFLPGPPPPPEVESSSGSSKVRMCAARRMMLLLAFLAYALDSA<br>AAYGTAETLCGGELVD TLQFVCGDRGFYFSRVPVGRNRRINRGIVEECCFRSCDLALLE<br>YCAKSVKSERDLSATSLAGLPALSKEFQKPSHAKYSKYDVWQKSSQRLQREVPGLIRA<br>RQYRWQAEGLOAAEEAKALHRPLISLPSQRPPAARASPETAGPQK                                                                                        |
| <i>Amazona aestiva</i> IGF1           | MCLSRVQGE LDNVFSLVHMHC FIEIKTSEKISKMKLIICIMATGILFGNVSTNISFEDGK<br>AMHFCGR TLDALILLCNMEETHLSAEVQPSQYIVKNTLNEMKANYKDIKSKLSRRQKR<br>DLVDTCCYKPKCYEDLRMYC                                                                                                                                                                           |
| <i>Amazona aestiva</i> IGF2           | MLLRRVV TALLAVAAGAALCGRADAASVAMKLCGRKLGELSRVCSAYNSPAWDVPTVVE<br>QTAGVRRRRRETGIVYECCTQGCTLEHLTEYCATTIKATSETSVDSHMIEDRS AESTGSG<br>STGAAGAAGMATAARAPAHIKSAARAAPVVGTVSPLLTWGRTLNTDLPTVDNDRYAYV<br>IYA                                                                                                                              |
| <i>Papilio xuthus</i> insulin         |                                                                                                                                                                                                                                                                                                                                 |
| <i>Papilio xuthus</i> IGF2            |                                                                                                                                                                                                                                                                                                                                 |



**Table S6. Cont.**

| VILP source                         | Sequence                                                                                                                                      |
|-------------------------------------|-----------------------------------------------------------------------------------------------------------------------------------------------|
| <i>Acyrtosiphon pisum</i> insulin   | MKISMYLSVILLALVIKVVVTANVRLQRSPQQYCGSKLADIMKALCNTKYNVPGHKRSEI<br>DFDVWDYKDLEDYNAVDPYIKKEDI SFMP SRFRRSVKRS I I DECCR RPCYLSELKSYCA<br>SQ       |
| <i>Ceratitidis capitata</i> insulin | MKFPEQTL SFPNLLCLSFVVISLVFCVELSPHCTEALPLLPGGSTEVEFKRYCSTNLSDA<br>IRLICGGRYYSLSRKF PDSVGMQVSSLKRLAGEDGEYRQPFQGA IHECCR RPCYSELK<br>SYCDPDY     |
| <i>Cavia porcellus</i> insulin      | MALWMHLLTVLALLALWGPN TGQAFVSRHLCGSNLVETLYSVCQDDGFFY I PKDRRELED<br>PQVEQTELG MGLGAGGLQPLALEMALQKRGIVDQCCTGTCTRHQLQSYCN                        |
| <i>Cavia porcellus</i> IGF1         | MHAVSSSHLFYLAFLCLLVLTSSATAGPETLCGAE LVDALQFVCGDRGFYFNKPTGYGSSS<br>RRAPQTGIVDECCFRSCDLRRLEMYCAPL KPAKSARSVRAQRHTDMPKTQKEVHLKNASR<br>GSAGNKNYRM |
| <i>Cavia porcellus</i> IGF2         | MGISMGKSMVLVLLTFLAFASCCIAAYR PSETLCGGELVDTLQFVCGDRGFYFSR PASRV S<br>RRSRGIVECCFRSCDLALLE TYCATPAKSERDVSASLAVLPDNFPRYPV GKFQYDTWR<br>QSTQRLRR  |
| SGIV-VILP                           | THQLQVCGGELIDALTEHCGDRGVYTPRRGRTRRSVGLADACCKNECDENELDRYCN                                                                                     |
| GIV-VILP                            | TYQLQVCGGELIDALTEHCGDRGVYTPSRGRNRNSVGLADACCKNECENELDRYCN                                                                                      |
| LCDV1-VILP                          | ITAEILCSAHLVAALQRVCGNRGVYRPPPTRRRSTRNGTTGIATKCCTTTGCTTDDLEKYCN                                                                                |
| LCDV-5a-VILP                        | ILCQTLCGSELVDALELVCGEYGGIYRPPKNANKK PQSGKKIVDVCCTTKGCNYMDLKQYCN                                                                               |

**Table S7. Approximate EC<sub>50</sub> values (nM) calculated for the autophosphorylation experiment**

| Receptor | Human insulin | hIGF-1 | GIV   | SGIV  | LCDV-1 |
|----------|---------------|--------|-------|-------|--------|
| hIGF1R   | 41            | 0.9    | 438   | 92    | 11     |
| hIR-A    | 0.51          | 8      | 2,063 | 745   | 484    |
| hIR-B    | 0.65          | 39     | 4,208 | 3,510 | 2,787  |

## Other Supporting Information Files

[Dataset S1 \(PDF\)](#)

[Dataset S2 \(PDF\)](#)

[Dataset S3 \(PDF\)](#)

[Dataset S4 \(PDF\)](#)

[Dataset S5 \(PDF\)](#)

[Dataset S6 \(PDF\)](#)
