# Supplementary material
Source: PubMed Central journal article supplement (PMC5877943)
Supplement: pnas.1721117115.sd02.pdf [file pnas.1721117115.sd02.pdf]

## Supplementary Dataset 2:

**This dataset contains the significant hits from different viral genomes identified with a threshold E-value  $\leq 0.1$  using tBlastn.** The viral genome database (ref\_viruses\_rep\_genomes.tar.gz,ftp://ftp.ncbi.nlm.nih.gov/blast/db/) was downloaded from NCBI and this database was searched for the hormone peptide sequences reported in **Extended Dataset 1**. The significant hits with a threshold E value  $\leq 0.1$  using tBlastn are reported below. The name of the human protein is reported at the top of every new hit set and the name of the viruses, scores and E-values are listed under the protein name for each hit. This is followed by the alignment figures comparing the human hormones (query) with the identified viral proteins (subject). The identical residues (Identities), conservatively sequences (Positives, +) and the gaps of the alignment (Gaps, -) are reported at the beginning of each alignment. **PART A** reports the results obtained using the precursor sequences of the proteins for the database search. **PART B** (p. 27) reports the hits obtained using processed sequences of the hormones. All these processed sequences were collected from Uniprot database. Because there are many hits identified for adiponectin, mainly based on the collagen domain, we share the adiponectin hits at the end of the document (p. 47). The list of the proteins are organized according to the database search as shown below. Endothelin 1 was only identified when we make the search using the processed active form of the hormone.

### A) The precursor sequences of human proteins that have significant sequences in viral genomes.

1. Insulin
2. Insulin-like growth factor-1
3. Insulin-like growth factor-2
4. Tumor necrosis factor
5. Transforming growth factor beta-1
6. Transforming growth factor beta-2
7. Endothelin-2
8. Inhibin beta A-chain
9. Complement factor D (Adipsin)
10. Resistin
11. Interleukin-6
12. Fibronectin type III domain-containing protein 5
13. Fibroblast growth factor 21
14. Fibroblast growth factor 19
15. Adiponectin (p.47)

### B) The processed sequences of the human proteins that have significant sequences in viral genomes.

**Endothelin-1 is the only hormone that was not identified with whole sequence (and not reported above) but identified with the processed hormone sequence search.**

1. Endothelin-2|49-69
2. Endothelin-1|53-90
3. Endothelin-1|53-73
4. Fibroblast growth factor 21|29-209
5. Fibroblast growth factor 19|25-216
6. Fibronectin type III domain-containing protein 5|32-212
7. Fibronectin type III domain-containing protein 5 (Irisin)|32-143
8. Transforming growth factor beta-2|303-414
9. Transforming growth factor beta-1|279-390

10. Tumor necrosis factor|57-233
11. Insulin-like growth factor 1|49-118
12. Insulin-like growth factor 2|25-91
13. Inhibin beta A chain|311-426
14. Interleukin-6|30-212
15. Resistin|19-108

**PART A: The results of the precursor sequence search of the human proteins**

**1. Human insulin**

Query= sp|P01308|INS\_HUMAN Insulin OS=Homo sapiens GN=INS PE=1 SV=1

Length=110

| Sequences producing significant alignments: |                                                         | Score  | E     |
|---------------------------------------------|---------------------------------------------------------|--------|-------|
|                                             |                                                         | (Bits) | Value |
| NC_033423.1                                 | Lymphocystis disease virus Sa isolate SA9, complete ... | 39.7   | 0.001 |
| NC_001824.1                                 | Lymphocystis disease virus 1, complete genome           | 37.0   | 0.007 |

>NC\_033423.1 Lymphocystis disease virus Sa isolate SA9, complete genome  
Length=208501

Score = 39.7 bits (91), Expect = 0.001, Method: Compositional matrix adjust.  
Identities = 29/84 (35%), Positives = 37/84 (44%), Gaps = 26/84 (31%)  
Frame = +2

```

Query   28      QHLCGSHLVEALYLVCGERGFFYTPKTRREAEDLQVGQVELGGGPGAGSLQPLALEGSLQ   87
          Q LCGS LV+AL LVCGE G Y P + P +G
Sbjct   203636  QTLCGSELVDALELVCGEYGGIYRPPKNANKK-----PQSG----- 203743

Query   88      KRGIVEQCCTSI-CSLYQLENYCN   110
          + IV+ CCT+ C+ L+ YCN
Sbjct   203744  -KKIVDVCCTTKGCNYMDLKQYCN   203812

```

>NC\_001824.1 Lymphocystis disease virus 1, complete genome  
Length=102653

Score = 37.0 bits (84), Expect = 0.007, Method: Compositional matrix adjust.  
Identities = 16/30 (53%), Positives = 19/30 (63%), Gaps = 0/30 (0%)  
Frame = +1

```

Query   30      LCGSHLVEALYLVCGERGFFYTPKTRREAE   59
          LC +HLV AL VCG RG + P TRR +
Sbjct   57112  LCSAHLVAALQRVCGNRGVYRPPPTRRRST   57201

```

|        |       |       |       |       |
|--------|-------|-------|-------|-------|
| Lambda | K     | H     | a     | alpha |
| 0.322  | 0.140 | 0.438 | 0.792 | 4.96  |

|        |   |   |   |       |       |
|--------|---|---|---|-------|-------|
| Gapped |   |   |   |       |       |
| Lambda | K | H | a | alpha | sigma |

0.267 0.0410 0.140 1.90 42.6 43.6

Effective search space used: 2144481100

## 2. Human Insulin-like growth factor I

Query= sp|P05019|IGF1\_HUMAN Insulin-like growth factor I OS=Homo sapiens  
GN=IGF1 PE=1 SV=1

Length=195

| Sequences producing significant alignments: |                                                         | Score<br>(Bits) | E<br>Value |
|---------------------------------------------|---------------------------------------------------------|-----------------|------------|
| NC_006549.1                                 | Singapore grouper iridovirus, complete genome           | 54.3            | 7e-08      |
| NC_033423.1                                 | Lymphocystis disease virus Sa isolate SA9, complete ... | 52.0            | 5e-07      |
| NC_001824.1                                 | Lymphocystis disease virus 1, complete genome           | 40.0            | 0.004      |

>NC\_006549.1 Singapore grouper iridovirus, complete genome  
Length=140131

Score = 54.3 bits (129), Expect = 7e-08, Method: Compositional matrix adjust.  
Identities = 26/61 (43%), Positives = 31/61 (51%), Gaps = 5/61 (8%)  
Frame = +3

```
Query 53      LCGAELVDALQFVCGDRGFYFNKPTGYGSSRRAPQTGIVDECCFRSCDLRRLEMYCAPL 112
              +CG EL+DAL  CGDRG Y      G + S      G+ D CC  CD  L+ YC P
Sbjct 58659   VCGGELIDALTEHCGDRGVYTPRRGRRTS-----VGLADACCKNECDENELDRYCNPK 58823
```

```
Query 113     K 113
              K
Sbjct 58824   K 58826
```

>NC\_033423.1 Lymphocystis disease virus Sa isolate SA9, complete genome  
Length=208501

Score = 52.0 bits (123), Expect = 5e-07, Method: Compositional matrix adjust.  
Identities = 29/74 (39%), Positives = 43/74 (58%), Gaps = 7/74 (9%)  
Frame = +2

```
Query 39      LLTFTSSATAGPETLCGAELVDALQFVCGDRGFYFNKPTGYGSSRRAPQTG--IVDECC 96
              +L  S +      +TLG+ELVDAL+ VCG+ G + P      ++ + PQ+G  IVD CC
Sbjct 203600   ILIVMSVSPILCQTLGSELVDALELVCGEYGGIYRPP----KNANKKPQSGKKIVDVCC 203767
```

```
Query 97      -FRSCDLRRLEMYC 109
              + C+   L+ YC
Sbjct 203768   TTKGCNYMDLKQYC 203809
```

>NC\_001824.1 Lymphocystis disease virus 1, complete genome  
Length=102653

Score = 40.0 bits (92), Expect = 0.004, Method: Compositional matrix adjust.  
Identities = 19/43 (44%), Positives = 24/43 (56%), Gaps = 0/43 (0%)  
Frame = +1

```
Query 35      LALCLLTFTSSATAGPETLCGAELVDALQFVCGDRGFYFNKPT 77
```

+ +CL + + E LC A LV ALQ VCG+RG Y PT  
 Sbjct 57058 IIVCLFVYCLLYSITAEILCSAHLVAALQRVCGNRGVYRPPPT 57186

Lambda K H a alpha  
 0.319 0.133 0.412 0.792 4.96

Gapped  
 Lambda K H a alpha sigma  
 0.267 0.0410 0.140 1.90 42.6 43.6

Effective search space used: 7443888780

### **3. Human Insulin-like growth factor II**

Query= sp|P01344|IGF2\_HUMAN Insulin-like growth factor II OS=Homo sapiens  
 GN=IGF2 PE=1 SV=1

Length=180

|                                                    |                                                                | Score         | E            |
|----------------------------------------------------|----------------------------------------------------------------|---------------|--------------|
| <b>Sequences producing significant alignments:</b> |                                                                | <b>(Bits)</b> | <b>Value</b> |
| <b>NC_006549.1</b>                                 | <b>Singapore grouper iridovirus, complete genome</b>           | <b>53.1</b>   | <b>1e-07</b> |
| <b>NC_033423.1</b>                                 | <b>Lymphocystis disease virus Sa isolate SA9, complete ...</b> | <b>37.7</b>   | <b>0.018</b> |

>NC\_006549.1 Singapore grouper iridovirus, complete genome  
 Length=140131

Score = 53.1 bits (126), Expect = 1e-07, Method: Compositional matrix adjust.  
 Identities = 39/99 (39%), Positives = 48/99 (48%), Gaps = 5/99 (5%)  
 Frame = +3

Query 7 KSM L V L L T F L A F A S C C I A A Y R P S E T L C G G E L V D T L Q F V C G D R G F Y F s r p a s r v s r r r s r G I 66  
 + M L L L F + I + + C G G E L + D L C G D R G Y P R S G +  
 Sbjct 58587 R K M L F K L M L L V F M T A T I E E T H Q L Q - V C G G E L I D A L T E H C G D R G V Y T - P P R R G R R T R S V G L 58760

Query 67 V E E C C F R S C D L A L L E T Y C A T P A K S E R D V S T - - P P T V L P D 103  
 + C C C D L + Y C P K S S T P T V P +  
 Sbjct 58761 A D A C C K N E C D E N E L D R Y C - N P K K S T V A P S T V A P S T V A P E 58874

>NC\_033423.1 Lymphocystis disease virus Sa isolate SA9, complete genome  
 Length=208501

Score = 37.7 bits (86), Expect = 0.018, Method: Compositional matrix adjust.  
 Identities = 23/60 (38%), Positives = 34/60 (57%), Gaps = 3/60 (5%)  
 Frame = +2

Query 30 E T L C G G E L V D T L Q F V C G D R G F Y F s r p a s r v s r r r s r G - - I V E E C C - F R S C D L A L L E T Y C A T 86  
 + T L C G E L V D L + V C G + G + P + + G I V + C C + C + L + Y C +  
 Sbjct 203636 Q T L C G S E L V D A L E L V C G E Y G G I Y R P P K N A N K K P Q S G K K I V D V C C T T K G C N Y M D L K Q Y C N S 203815

Lambda K H a alpha  
 0.324 0.139 0.446 0.792 4.96

Gapped  
 Lambda K H a alpha sigma  
 0.267 0.0410 0.140 1.90 42.6 43.6

Effective search space used: 6246711324

#### **4. Human Tumor necrosis factor**

Query= sp|P01375|TNFA\_HUMAN Tumor necrosis factor OS=Homo sapiens GN=TNF  
 PE=1 SV=1

Length=233

| <b>Sequences producing significant alignments:</b>                  | <b>Score<br/>(Bits)</b> | <b>E<br/>Value</b> |
|---------------------------------------------------------------------|-------------------------|--------------------|
| <b>NC_030656.1 Pteropox virus strain Australia, complete genome</b> | <b>52.8</b>             | <b>5e-07</b>       |

>NC\_030656.1 Pteropox virus strain Australia, complete genome  
 Length=133492

Score = 52.8 bits (125), Expect = 5e-07, Method: Compositional matrix adjust.  
 Identities = 38/151 (25%), Positives = 63/151 (42%), Gaps = 24/151 (16%)  
 Frame = +1

|       |       |                                                              |       |
|-------|-------|--------------------------------------------------------------|-------|
| Query | 86    | DKPVAHVVANPQAEGQL-----QWLNRRANALLANGVELRDNQLVVPSEGLY         | 132   |
|       |       | + VAHV N +L W N N +L+N + D +++V GLY                          |       |
| Sbjct | 34069 | NTSVAHVVTGNNWNERLYPNNSYFLGKITSWSNTSNNVLSNSYYI-DGEIIVTVSGLY   | 34245 |
|       |       |                                                              |       |
| Query | 133   | LIYSQVLFK-----GQGCPSTHVLLTHTISRIAVSYQTKVNLLSAIKSPCQRETPEGAEA | 187   |
|       |       | IY+Q FK S ++ + I + SY + L+ + +S C +T E                       |       |
| Sbjct | 34246 | YIYAQTYFKLIFGYNSKGNKNIQMVQYIYKNTSSYGDPLMLMKSARSNCWDKTAEYGLY  | 34425 |
|       |       |                                                              |       |
| Query | 188   | KPWYEPIYLGGVFQLEKGDRLSAEINRPDYL                              | 218   |
|       |       | +Y GG+ L+KGD + + ++L                                         |       |
| Sbjct | 34426 | -----SVYQGGIHYLKKGDSVFVTVTNKNFL                              | 34503 |

Lambda K H a alpha  
 0.318 0.135 0.396 0.792 4.96

Gapped  
 Lambda K H a alpha sigma  
 0.267 0.0410 0.140 1.90 42.6 43.6

Effective search space used: 10435098712

#### **5. Human Transforming growth factor beta-1**

Query= sp|P01137|TGFB1\_HUMAN Transforming growth factor beta-1 OS=Homo  
 sapiens GN=TGFB1 PE=1 SV=2

Length=390

| <b>Sequences producing significant alignments:</b> | <b>Score<br/>(Bits)</b> | <b>E<br/>Value</b> |
|----------------------------------------------------|-------------------------|--------------------|
|----------------------------------------------------|-------------------------|--------------------|

|             |                                                         |      |       |
|-------------|---------------------------------------------------------|------|-------|
| NC_006966.1 | Deerpox virus W-848-83, complete genome                 | 100  | 8e-22 |
| NC_002188.1 | Fowlpox virus, complete genome                          | 68.2 | 4e-11 |
| NC_024446.1 | Penguinpox virus isolate PSan92, complete genome        | 66.2 | 1e-10 |
| NC_024447.1 | Pigeonpox virus isolate FeP2, complete genome           | 64.7 | 4e-10 |
| NC_005309.1 | Canarypox virus, complete genome                        | 61.2 | 5e-09 |
| NC_028238.1 | Turkeypox virus strain TKPV-HU1124/2011, complete ge... | 50.4 | 1e-05 |

>NC\_006966.1 Deerpox virus W-848-83, complete genome  
Length=166259

Score = 100 bits (249), Expect = 8e-22, Method: Compositional matrix adjust.  
Identities = 59/154 (38%), Positives = 88/154 (57%), Gaps = 31/154 (20%)  
Frame = +3

```

Query 243      RRGDLA--TIHGMRPFLLLMATPLERAQHLQSSRHRRALDTNYC-FSSTEKNCCVRQLY 299
              R D+A I +N P +LL+ ++ ++++ RH +D+ C SST CC+ Y
Sbjct 155088   RIQDMAKLNISNINNPILLK---KKNNNIRTVRH--VMDS--CELSST---CCLVDFY 155237

Query 300      IDFRKDLGWKWIHEPKGYHANFCLGPCPYIWSLDTQYSKVLAL-YN---QHNPASAAAPC 355
              ID+KD+GW WI++P+GYHAN C+G C + K++ + YN +HN C
Sbjct 155238   IDFKKDMGWNWIYKPEGYHANLCIGNCNH-----KLINMPYNYAFKHN-----VFC 155375

Query 356      CVPQALEPLPIVYYVGRKPKVEQLSNMIVRSCKC 389
              C P+ ++ L I YY GRK KV+ L NM + SC C
Sbjct 155376   CAPKMKSLIIAYYEGRKYKVDNLKNMKIVSCGC 155477

```

>NC\_002188.1 Fowlpox virus, complete genome  
Length=288539

Score = 68.2 bits (165), Expect = 4e-11, Method: Compositional matrix adjust.  
Identities = 38/109 (35%), Positives = 55/109 (50%), Gaps = 3/109 (3%)  
Frame = -2

```

Query 281      DTNYCFSSSTEKNCCVRQLYIDFRKDLGWKWIHEPKGYHANFCLGPCPYIWSLDTQYSKVL 340
              D+ +SS NC V + YI+FR +G KWI P G +C+G C D+ +L
Sbjct 80251    DSGVDYSSPSDNCKVYRKYINFRS-IGLKWILHPPGIDYGYCMGECQSFVYTDSEFLYSL 80075

Query 341      ALYNQHNPASAAAPCCVPQALEPLPIVYYVGRKPKVEQLSNMIVRSCKC 389
              A + G CC Q+++ L + Y +GR PK L + V+SCKC
Sbjct 80074   AF--HYIDGIELKQCCSIQSMDDLHVHYRLGRTPKTAILRKVSVKSKC 79934

```

>NC\_024446.1 Penguinpox virus isolate PSan92, complete genome  
Length=306862

Score = 66.2 bits (160), Expect = 1e-10, Method: Compositional matrix adjust.  
Identities = 39/115 (34%), Positives = 55/115 (48%), Gaps = 11/115 (10%)  
Frame = -2

```

Query 275      RHRRALDTNYCFSSSTEKNCCVRQLYIDFRKDLGWKWIHEPKGYHANFCLGPCPYIWSLDT 334
              + R D+NYC + + YI+FR D+G KWI P G +C+G C D+
Sbjct 88680   KKRSIQDSNYCK-----IYRKYINFR-DIGLKWILHPPGIDYGYCVGECTSFAYTDS 88528

Query 335      QYSKVLALYNQHNPASAAAPCCVPQALEPLPIVYYVGRKPKVEQLSNMIVRSCKC 389
              +LA + G CC Q ++ L + Y VGR PK L + V+SCKC

```

Sbjct 88527 FLYSLLAF--HYIDGIELKQCCSIQDMDDLIVHYRVGRTPKTSVLYKVSVKSKC 88369

Score = 50.4 bits (119), Expect = 1e-05, Method: Compositional matrix adjust.  
Identities = 26/85 (31%), Positives = 37/85 (44%), Gaps = 1/85 (1%)  
Frame = +1

Query 306 LGWKWIHEPKGYHANFCLGPCPYIWSLDTQYSKVLALYNQHNP GASAAPCCVPQALEPLP 365  
LG+KWIHEP+G +C G C + S D + + CC P+ E +  
Sbjct 166063 LGYKWIHEPRGIQFTYCYGTCV-MGSYDESSVIYGT VVTNYISDKGIPSCCSPKRREDIT 166239  
Query 366 IVYYVGRKPKVEQLSNMIVRSCKC 390  
I YY GR + + N + C C  
Sbjct 166240 ISYYRGRNIEKHTIHNFMPTHCGC 166314

>NC\_024447.1 Pigeonpox virus isolate FeP2, complete genome  
Length=282356

Score = 64.7 bits (156), Expect = 4e-10, Method: Compositional matrix adjust.  
Identities = 35/98 (36%), Positives = 50/98 (51%), Gaps = 3/98 (3%)  
Frame = -3

Query 292 NCCVRQLYIDFRKDLGWKWIHEPKGYHANFCLGPCPYIWSLDTQYSKVLALYNQHNP GAS 351  
+C + + YI+FR D+G KWI P G +C+G C D+ +LA + G  
Sbjct 87537 DCRIYRKYINFR-DIGLKWILHPPGIDYGYCVGECTSFAYTDSFLYSLLAF--HYIDGIE 87367  
Query 352 AAPCCVPQALEPLPIVYYVGRKPKVEQLSNMIVRSCKC 389  
CC Q ++ L + Y VGR PK L + V+SCKC  
Sbjct 87366 LKQCCSIQDMDDLIVHYRVGRTPKTSVLYKVSVKSKC 87253

>NC\_005309.1 Canarypox virus, complete genome  
Length=359853

Score = 61.2 bits (147), Expect = 5e-09, Method: Compositional matrix adjust.  
Identities = 35/100 (35%), Positives = 50/100 (50%), Gaps = 8/100 (8%)  
Frame = +1

Query 293 CCVRQLYIDFRKDLGWKWIHEPKGYHANFCLGPCPYIWSLDTQ---YSKVLALYNQHNP G 349  
C + +Y+DF LG+KWIHEPKG +C G C + S D Y ++ Y +N  
Sbjct 199456 CSLNSVYLD FSA-LGYKWIHEPKGIQFTYCHGT CI-LSSYDKSSVIYGTIVTNYLSNN-- 199623  
Query 350 ASAAPCCVPQALEPLPIVYYVGRKPKVEQLSNMIVRSCKC 389  
CC P+ + + I YY+GR K + + N I C C  
Sbjct 199624 -RIPLCCSPKERKDITITYYLGRNVKKQTIRNFIPTHCGC 199740

Score = 50.8 bits (120), Expect = 1e-05, Method: Compositional matrix adjust.  
Identities = 29/97 (30%), Positives = 47/97 (48%), Gaps = 3/97 (3%)  
Frame = -3

Query 293 CCVRQLYIDFRKDLGWKWIHEPKGYHANFCLGPCPYIWSLDTQYSKVLALYNQHNP GASA 352  
C +R ++ F KDLG WI PK + +C G C I S T+ S + ++ +  
Sbjct 194440 CLLRHKHKMF-KDLGCNWILRPKSFIFTYCKGTC--IISFTRSSIIYGS MFINDIKKNI 194270  
Query 353 APCCVPQALEPLPIVYYVGRKPKVEQLSNMIVRSCKC 389  
CC P + I+Y +G+ KV ++ + + SC C

Sbjct 194269 HICCAPVTRSINITIMYMLGKNVKVSEIKDFLPSSCGC 194159

Score = 49.3 bits (116), Expect = 3e-05, Method: Compositional matrix adjust.  
Identities = 31/108 (29%), Positives = 42/108 (39%), Gaps = 10/108 (9%)  
Frame = +3

Query 286 FSSTEKNCCVRQLYIDFRKDLGWKWIHEPKGYHANFCLGPCPYIWSLDTQYSKVLALY-- 343  
F + C +R + I F D G KWI P +C G C + Y K +Y  
Sbjct 195411 FLDIDAICNIRSINIKF-ADYGMKWILSPLSTVLTICYGICSI-----SSYQKTSLMYGT 195572  
Query 344 --NQHNPGASAAPCCVPQALEPLPIVYVGRKPKVEQLSNMIVRSCKC 389  
H P + CC P I Y VGR K + ++N + C C  
Sbjct 195573 IITNHMPDNTIPQCCYPITRSNFTIRYKVGRIKTDVINNFMPLECAC 195716

Score = 45.4 bits (106), Expect = 4e-04, Method: Compositional matrix adjust.  
Identities = 31/100 (31%), Positives = 46/100 (46%), Gaps = 8/100 (8%)  
Frame = -2

Query 293 CCVRQLYIDFRKDLGWKWIHEPKGYHANFCLGPCPYIWSLDTQ---YSKVLALYNQHNP 349  
C +R YI F +D+G W+ PKG ++C G C + S D Y K+L L + H  
Sbjct 198458 CSLRYQYITF-EDMGCNWWLSPKGIMFSYCTGTTCV-VSSFDKSSVIYGKML-LNSIHKTK 198288  
Query 350 ASAAPCCVPQALEPLPIVYVGRKPKVEQLSNMIVRSCKC 389  
CC P + + I Y G+ K ++ N + C C  
Sbjct 198287 LHV--CCKPIRRQSVKITYMHGKNIKQSEIKNFMPSECGC 198174

>NC\_028238.1 Turkeypox virus strain TKPV-HU1124/2011, complete genome  
Length=188534

Score = 50.4 bits (119), Expect = 1e-05, Method: Compositional matrix adjust.  
Identities = 32/100 (32%), Positives = 48/100 (48%), Gaps = 4/100 (4%)  
Frame = +2

Query 291 KNCCVRQLYIDFRKDLGWKWIHEPKGYHANFCLGPCPYIWSLDTQYSKVL-ALYNQHNP 349  
K C + YI F KD+G W+ PKG+ +C G C I S T+ S V A+  
Sbjct 64325 KECALHYKYISF-KDVGCNWWLSPKGFTRFYCKGEC--IVSSFTKSSIVYGAMLVNDAKS 64495  
Query 350 ASAAPCCVPQALEPLPIVYVGRKPKVEQLSNMIVRSCKC 389  
++ CC P++ + I+Y VG + + N + SC C  
Sbjct 64496 SNIHICCSPKSRTSMRIMYAVGSNIRESTIHNFMPSSCGC 64615

Score = 48.1 bits (113), Expect = 6e-05, Method: Compositional matrix adjust.  
Identities = 29/97 (30%), Positives = 40/97 (41%), Gaps = 2/97 (2%)  
Frame = -3

Query 293 CCVRQLYIDFRKDLGWKWIHEPKGYHANFCLGPCPYIWSLDTQYSKVLALYNQHNP 352  
C + IDF LG KWI PK +C G C + S D L N + +  
Sbjct 63210 CKLHHKRIDF-SSLGMKWITYPKSIDITYCSGICV-VGSYDKTSVIYGTLVNSYMASHNI 63037  
Query 353 APCCVPQALEPLPIVYVGRKPKVEQLSNMIVRSCKC 389  
CC P+ L + Y GRK + + N + +C C  
Sbjct 63036 PQCCFPKTRSHLTVTYMSGRKQMNQTIKNFMPATCSC 62926



Lambda K H a alpha  
 0.320 0.135 0.426 0.792 4.96

Gapped

Lambda K H a alpha sigma  
 0.267 0.0410 0.140 1.90 42.6 43.6

Effective search space used: 23335195884

## 6. Human Transforming growth factor beta-2

Query= sp|P61812|TGFB2\_HUMAN Transforming growth factor beta-2 OS=Homo sapiens GN=TGFB2 PE=1 SV=1

Length=414

| Sequences producing significant alignments: |                                                         | Score<br>(Bits) | E<br>Value |
|---------------------------------------------|---------------------------------------------------------|-----------------|------------|
| NC_006966.1                                 | Deerpox virus W-848-83, complete genome                 | 83.2            | 7e-16      |
| NC_024447.1                                 | Pigeonpox virus isolate FeP2, complete genome           | 67.8            | 5e-11      |
| NC_024446.1                                 | Penguinpox virus isolate PSan92, complete genome        | 67.4            | 7e-11      |
| NC_002188.1                                 | Fowlpox virus, complete genome                          | 65.9            | 2e-10      |
| NC_005309.1                                 | Canarypox virus, complete genome                        | 62.4            | 3e-09      |
| NC_028238.1                                 | Turkeypox virus strain TKPV-HU1124/2011, complete ge... | 47.8            | 8e-05      |

>NC\_006966.1 Deerpox virus W-848-83, complete genome  
 Length=166259

Score = 83.2 bits (204), Expect = 7e-16, Method: Compositional matrix adjust.  
 Identities = 47/137 (34%), Positives = 67/137 (49%), Gaps = 22/137 (16%)  
 Frame = +3

```

Query 278      TPHELLMLLPSYRLESQQTNRRKKR-ALDAAAYCFRNVQDNCCLRPLYIDFKRDLGWKWIH 336
              PH+LL          L+ + N R R +D+          + CCL YIDFK+D+GW WI+
Sbjct 155130   NPHILL-----LKKKNNNIRTVRHVMDSC----ELSTCCLVDFYIDFKKDMGWNWIY 155276

Query 337      EPKGYNANFCAGACPYLWSSDTQHRSRVLSLYNTINPEASASPCCVSQDLEPLTILYYIGK 396
              +P+GY+AN C G C          H + YN          CC + ++ L I YY G+
Sbjct 155277   KPEGYHANLCIGNC-----NHKLINMPYNY--AFKHNVFCCAPKMKSLI IAYYEGR 155426

Query 397      TPKIEQLSNMIVKSKC 413
              K++ L NM + SC C
Sbjct 155427   KYKVDNLKMKIVSCGC 155477
  
```

>NC\_024447.1 Pigeonpox virus isolate FeP2, complete genome  
 Length=282356

Score = 67.8 bits (164), Expect = 5e-11, Method: Compositional matrix adjust.  
 Identities = 39/105 (37%), Positives = 57/105 (54%), Gaps = 5/105 (5%)  
 Frame = -3

```

Query 311      RNVQD--NCCLRPLYIDFKRDLGWKWIHEPKGYNANFCAGACPYLWSSDTQHRSRVLSLYN 368
              R+VQD +C + YI+F RD+G KWI P G + +C G C +D+ +L+ +
Sbjct 87558   RSVQDSNDCRIYRKYINF-RDIGLKWILHPPGIDYGYCVGECTSFAYTDSFLYSLAFHY 87382
  
```

Query 369 TINPEASASPCCVSQDLEPLTILYYIGKTPKIEQLSNMIVKSKC 413  
E CC QD++ L + Y +G+TPK L + VKSKC  
Sbjct 87381 IDGIELKQ--CCSIQDMDDLIVHYRVGRTPKTSVLYKVSVKSKC 87253

>NC\_024446.1 Penguinpox virus isolate PSan92, complete genome  
Length=306862

Score = 67.4 bits (163), Expect = 7e-11, Method: Compositional matrix adjust.  
Identities = 38/105 (36%), Positives = 57/105 (54%), Gaps = 5/105 (5%)  
Frame = -2

Query 311 RNVQDN--CCLRPLYIDFKRDLGWKWIHEPKGYNANFCAGACPYLWSSDTQHRSRVLSLYN 368  
R++QD+ C + YI+F RD+G KWI P G + +C G C +D+ +L+ +  
Sbjct 88674 RSIQDSNYCKIYRKYINF-RDIGLKWILHPPGIDYGYCVGECTSFAYTDSFLYSLAFHY 88498

Query 369 TINPEASASPCCVSQDLEPLTILYYIGKTPKIEQLSNMIVKSKC 413  
E CC QD++ L + Y +G+TPK L + VKSKC  
Sbjct 88497 IDGIELKQ--CCSIQDMDDLIVHYRVGRTPKTSVLYKVSVKSKC 88369

Score = 48.1 bits (113), Expect = 8e-05, Method: Compositional matrix adjust.  
Identities = 25/85 (29%), Positives = 38/85 (45%), Gaps = 1/85 (1%)  
Frame = +1

Query 330 LGWKWIHEPKGYNANFCAGACPYLWSSDTQHRSRVLSLYNTINPEASASPCCVSQDLEPLT 389  
LG+KWIHEP+G +C G C + S D ++ + CC + E +T  
Sbjct 166063 LGYKWIHEPRGIQFTYCYGTC-VMGSYDESSVIYGTVVNTNYISDKGIPSCCSPKRREDIT 166239

Query 390 ILYYIGKTPKIEQLSNMIVKSKCS 414  
I YY G+ + + N + C C  
Sbjct 166240 ISYYRGRNIEKHTIHNFMPTHCGCG 166314

>NC\_002188.1 Fowlpox virus, complete genome  
Length=288539

Score = 65.9 bits (159), Expect = 2e-10, Method: Compositional matrix adjust.  
Identities = 39/128 (30%), Positives = 60/128 (47%), Gaps = 3/128 (2%)  
Frame = -2

Query 286 LPSYRLESQQTNRRKKRALDAAYCFRNVQDNCCCLRPLYIDFKRDLGWKWIHEPKGYNANF 345  
LP+ +K D+ + + DNC + YI+F R +G KWI P G + +  
Sbjct 80308 LPTESTNKMSVGSKKYVESDSGVDYSSPSDNCKVYRKYINF-RSIGLKWILHPPGIDYGY 80132

Query 346 CAGACPYLWSSDTQHRSRVLSLYNTINPEASASPCCVSQDLEPLTILYYIGKTPKIEQLSN 405  
C G C +D+ +L+ + E CC Q ++ L + Y +G+TPK L  
Sbjct 80131 CMGECQSFVYTDSDFLYSLAFHYIDGIELKQ--CCSIQSMDDLIVHYRLGRTPKTAILRK 79958

Query 406 MIVKSKC 413  
+ VKSKC  
Sbjct 79957 VSVKSKC 79934

>NC\_005309.1 Canarypox virus, complete genome  
Length=359853

Score = 62.4 bits (150), Expect = 3e-09, Method: Compositional matrix adjust.

Identities = 36/102 (35%), Positives = 52/102 (51%), Gaps = 4/102 (4%)  
Frame = +1

Query 314 QDNCCLRPLYIDFKRDLGWKWIHEPKGYNANFCAGACPYLWSSDTQHRSRVLSLYNTINPE 373  
Q C L +Y+DF LG+KWIHEPKG +C G C + SS + S + T  
Sbjct 199447 QHVC SLNSVYLD FSA-LGYKWIHEPKGIQFTYCHGTC--ILSSYDKSSVIYGTIVTNYLS 199617

Query 374 ASASP-CCVSQDLEPLTILYYIGKTPKIEQLSNMIVKSCCKS 414  
+ P CC ++ + +TI YY+G+ K + + N I C C  
Sbjct 199618 NNRIPLCCSPKERKDITITYYLGRNVKQ TIRNFIPTHCGCG 199743

Score = 52.4 bits (124), Expect = 3e-06, Method: Compositional matrix adjust.  
Identities = 30/97 (31%), Positives = 48/97 (49%), Gaps = 3/97 (3%)  
Frame = -3

Query 317 CCLRPLYIDFKRDLGWKWIHEPKGYNANFCAGACPYLWSSDTQHRSRVLSLYNTINPEASA 376  
C LR ++ FK DLG WI PK + +C G C + SS T+ S + + + +  
Sbjct 194440 CLLRHKHMKFK-DLGCNWILRPKSFIFTYCKGTC--IISFTRSSIIYGS MFINDIKNI 194270

Query 377 SPCCVSQDLEPLTILYYIGKTPKIEQLSNMIVKSCCKC 413  
CC +TI+Y +GK K+ ++ + + SC C  
Sbjct 194269 HICCAPVTRS NITIMYMLGKNVKVSEIKDFLPSSCGC 194159

Score = 45.1 bits (105), Expect = 7e-04, Method: Compositional matrix adjust.  
Identities = 32/101 (32%), Positives = 48/101 (48%), Gaps = 6/101 (6%)  
Frame = -2

Query 315 DNCCLRPLYIDFKRDLGWKWIHEPKGYNANFCAGACPYLWSSDTQHRSRVLS--LYNTINP 372  
D C LR YI F+ D+G W+ PKG ++C G C + SS + S + L N+I+  
Sbjct 198464 DICSLRYQYITFE-DMGCNWVLS PKGIMFSYCTGTC--VVSSFDKSSVIY GKMLLSNIH- 198297

Query 373 EASASPCCVSQDLEPLTILYYIGKTPKIEQLSNMIVKSCCKC 413  
+ CC + + I Y GK K ++ N + C C  
Sbjct 198296 KTKLHVCKPIRRQSVKITYMHGKNIKQSEIKNFMPSECGC 198174

Score = 43.9 bits (102), Expect = 0.002, Method: Compositional matrix adjust.  
Identities = 35/129 (27%), Positives = 53/129 (41%), Gaps = 17/129 (13%)  
Frame = +3

Query 290 RLESQQTNRKRKRALDAAYCFRNVDNCCLRPLYIDFKRDLGWKWIHEPKGYNANFCAGA 349  
R ES+ R K+ LD + C +R + I F D G KWI P +C G  
Sbjct 195372 RSESELLPRVKRDFLD-----IDAICNIRSINIKFA-DYGMKWILSPLSTVLT YCYGI 195527

Query 350 CPYLWSSDTQHRSRVLSLYNTI----NPEASASPCCVSQDLEPLTILYYIGKTPKIEQLSN 405  
C S + + + +Y TI P+ + CC TI Y +G+ K + ++N  
Sbjct 195528 C-----SISSYQKTS LMYGTIITNHMPDNTIPQCCYPITRSNFTIRYKVG RNIKTDVINN 195692

Query 406 MIVKSCCKS 414  
+ C C  
Sbjct 195693 FMPLECACG 195719

>NC\_028238.1 Turkeypox virus strain TKPV-HU1124/2011, complete genome  
Length=188534

Score = 47.8 bits (112), Expect = 8e-05, Method: Compositional matrix adjust.  
 Identities = 31/99 (31%), Positives = 47/99 (47%), Gaps = 6/99 (6%)  
 Frame = +2

```

Query 317 CCLRPLYIDFKRDLGWKWIHEPKGYNANFCAGACPYLWSSDTQHSRVLSLYNTINPEASA 376
          C L  YI FK D+G W+  PKG+  +C G C  + SS T+ S V      +N  S+
Sbjct 64331 CALHYKYISFK-DVGCNWWLSPKGFTRFYCKGEC--IVSSFTKSSIVYGAM-LVNDAKSS 64498

Query 377 S--PCCVSDLEPLTILYYIGKTPKIEQLSNMIVKSKC 413
          +  CC  +      + I+Y +G  +  + N +  SC C
Sbjct 64499 NIHICCSPKSRTSMRIMYAVGSNIRESTIHNFMPPSSCGC 64615
  
```

Score = 43.9 bits (102), Expect = 0.001, Method: Compositional matrix adjust.  
 Identities = 28/97 (29%), Positives = 42/97 (43%), Gaps = 2/97 (2%)  
 Frame = -3

```

Query 317 CCLRPLYIDFKRDLGWKWIHEPKGYNANFCAGACPYLWSSDTQHSRVLSLYNTINPEASA 376
          C L   IDF  LG KWI  PK  +  +C+G C  + S D      +L N+  +
Sbjct 63210 CKLHHKRIDFS-SLGMKWITYPKSIDITYCSGICV-VGSYDKTSVIYGTLVNSYMASHNI 63037

Query 377 SPCCVSDLEPLTILYYIGKTPKIEQLSNMIVKSKC 413
          CC  +      LT+ Y  G+  + + N +  +C C
Sbjct 63036 PQCCFPKTRSHLTVTYMSGRKQMNQTIKNFMPATCSC 62926
  
```

Lambda K H a alpha  
 0.322 0.135 0.415 0.792 4.96

Gapped  
 Lambda K H a alpha sigma  
 0.267 0.0410 0.140 1.90 42.6 43.6

Effective search space used: 25386641676

## 7. Human Endothelin-2

Query= sp|P20800|EDN2\_HUMAN Endothelin-2 OS=Homo sapiens GN=EDN2 PE=1 SV=2

Length=178

| Sequences producing significant alignments:                | Score<br>(Bits) | E<br>Value   |
|------------------------------------------------------------|-----------------|--------------|
| <b>NC_006966.1 Deerpox virus W-848-83, complete genome</b> | <b>42.7</b>     | <b>4e-04</b> |

>NC\_006966.1 Deerpox virus W-848-83, complete genome  
 Length=166259

Score = 42.7 bits (99), Expect = 4e-04, Method: Compositional matrix adjust.  
 Identities = 17/56 (30%), Positives = 30/56 (54%), Gaps = 0/56 (0%)  
 Frame = -1

```

Query 14 ALLVALHEGKGQAAATLEQPASSSHAQGTHLRLRRCSCSSWLDKECVYFCHLDIIW 69
          ++++ E      ++++  +  +  H R +RC C  +  DKEC+ FC LDIIW
Sbjct 5273 SIMLCCENDES YISSIDDNINKPDSNIPHKRTRKRCYCDTHDDKECMNFCELDIIW 5106
  
```

Lambda K H a alpha  
 0.320 0.129 0.418 0.792 4.96

Gapped  
 Lambda K H a alpha sigma  
 0.267 0.0410 0.140 1.90 42.6 43.6

Effective search space used: 6075568548

**8. Human Inhibin beta A chain**

Query= sp|P08476|INHBA\_HUMAN Inhibin beta A chain OS=Homo sapiens GN=INHBA  
 PE=1 SV=2

Length=426

|                                                    |                                                         | Score         | E            |
|----------------------------------------------------|---------------------------------------------------------|---------------|--------------|
| <b>Sequences producing significant alignments:</b> |                                                         | <b>(Bits)</b> | <b>Value</b> |
| NC_006966.1                                        | Deerpox virus W-848-83, complete genome                 | 63.2          | 1e-09        |
| NC_028238.1                                        | Turkeypox virus strain TKPV-HU1124/2011, complete ge... | 58.9          | 4e-08        |
| NC_005309.1                                        | Canarypox virus, complete genome                        | 53.5          | 2e-06        |
| NC_024446.1                                        | Penguinpox virus isolate PSan92, complete genome        | 45.4          | 5e-04        |
| NC_024447.1                                        | Pigeonpox virus isolate FeP2, complete genome           | 40.0          | 0.026        |

>NC\_006966.1 Deerpox virus W-848-83, complete genome  
 Length=166259

Score = 63.2 bits (152), Expect = 1e-09, Method: Compositional matrix adjust.  
 Identities = 34/106 (32%), Positives = 50/106 (47%), Gaps = 20/106 (19%)  
 Frame = +3

```

Query   321      CCKKQFFVSVFK-DIGWNDWIIAPSGYHANYCEGECPSHIAGTSGSSLSFHSTVINHYRMR  379
          CC  F++ FK D+GWN WI  P GYHAN C G C  +                               M
Sbjct   155217  CCLVDFYIDFKKDMGWN-WIYKPEGYHANLNCIGNCNHKLIN-----MP  155342

Query   380      GHSPFANLKSCCVPTKLRPMSMLYDDGQNIKKDIQNMIVEECGC  425
          +  F +   CC P K++ + + YY +G+      +++NM +  CGC
Sbjct   155343  YNYAFKHNVFCCAPKMKSLIIAYY-EGRKYKVDNLDKMKIVSCGC  155477
  
```

>NC\_028238.1 Turkeypox virus strain TKPV-HU1124/2011, complete genome  
 Length=188534

Score = 58.9 bits (141), Expect = 4e-08, Method: Compositional matrix adjust.  
 Identities = 31/99 (31%), Positives = 54/99 (55%), Gaps = 10/99 (10%)  
 Frame = +2

```

Query   327      FVSFKDIGWNDWIIAPSGYHANYCEGECPSHIAGTSGSSLSFHSTVINHYRMRGHSPFAN  386
          ++SFKD+G N W+++P G+   YC+GEC  ++  + SS+ + + ++N  +      +N
Sbjct   64349  YISFKDVGCN-WVLSPKGFTFRYCKGECI--VSSFTKSSIVYGAMLVNDAKS-----SN  64501

Query   387      LKSCCVPTKLRPMSMLYDDGQNIKKDIQNMIVEECGC  425
          +  CC P      M ++ Y  G NI +  I N +   CGC
Sbjct   64502  IHICCSPKSRTSMRIM-YAVGSNIRESTIHNFMPSSCGC  64615
  
```

Score = 40.8 bits (94), Expect = 0.013, Method: Compositional matrix adjust.  
Identities = 30/118 (25%), Positives = 49/118 (42%), Gaps = 10/118 (8%)  
Frame = -3

Query 308 RRRGLECDGKVNICCKKQFFVSVFKDIGWNDWIIAPSGYHANYCEGECPSHIAGTSGSSLS 367  
++ L+ D + C + F +G WI P YC G C + G+ +  
Sbjct 63249 KKDYLKADDRNTTCKLHHKRIDFSSLGMK-WITYPKSIDITYCSGIC---VVGSYDKTSV 63082

Query 368 FHSTVINHYRMRGHSFPANLKSCCVPTKLRPMSMLYDDGQNIKKDIQNMIVEECGC 425  
+ T++N Y M H N+ CC P K R + Y G+ + + I+N + C C  
Sbjct 63081 IYGTLVNSY-MASH----NIPQCCFP-KTRSHLTVTYMSGRKQMNQTIKNFMPATCSC 62926

>NC\_005309.1 Canarypox virus, complete genome  
Length=359853

Score = 53.5 bits (127), Expect = 2e-06, Method: Compositional matrix adjust.  
Identities = 30/105 (29%), Positives = 49/105 (47%), Gaps = 2/105 (2%)  
Frame = -3

Query 321 CCKKQFFVSVFKDIGWNDWIIAPSGYHANYCEGECPSHIAGTSGSSLSFHSTVINHYRMRG 380  
C KQ ++ K + +D IIAP G YC G C + S+ + + ++  
Sbjct 74056 CTTKQKYLKLDLKYLDMDDTIIAPRGITFKYCSGYCDINSMKNFYNSLYGILAMKFISLKA 73877

Query 381 HSPFANLKSCCVPTKLRPMSMLYDDGQNIKKDIQNMIVEECGC 425  
+ +N K CC P + +S+LY D NI K ++ N + +C C  
Sbjct 73876 IN--SNFKRCCYPESMENISILYIDPNGNIKKGELVNSTISKVC 73748

Score = 53.1 bits (126), Expect = 2e-06, Method: Compositional matrix adjust.  
Identities = 30/107 (28%), Positives = 56/107 (52%), Gaps = 10/107 (9%)  
Frame = -2

Query 319 NICCKKQFFVSVFKDIGWNDWIIAPSGYHANYCEGECPSHIAGTSGSSLSFHSTVINHYRM 378  
+IC + +++F+D+G N W+++P G +YC G C ++ SS+ + ++N  
Sbjct 198464 DICSLRYQYITFEDMGCN-WVLSPPKIMFSYCTGTVC--VSSFDKSSVIYGKMLLSNIHK 198294

Query 379 RGHSFPANLKSCCVPTKLRPMSMLYDDGQNIKKDIQNMIVEECGC 425  
L CC P + + + + Y G+NI + +I+N + ECGC  
Sbjct 198293 -----TKLHVCKPIRRQSVKITYMH-GKNIKQSEIKNFMPSECGC 198174

Score = 52.0 bits (123), Expect = 5e-06, Method: Compositional matrix adjust.  
Identities = 30/106 (28%), Positives = 49/106 (46%), Gaps = 10/106 (9%)  
Frame = +1

Query 320 ICCKKQFFVSVFKDIGWNDWIIAPSGYHANYCEGECPSHIAGTSGSSLSFHSTVINHYRMR 379  
+C ++ F +G+ WI P G YC G C I + S + T++ +Y  
Sbjct 199453 VCSLNSVYLDIFSALGY-KWIHEPKGIQFTYCHGTC---ILSSYDKSSVIYGTIVTNYLSN 199620

Query 380 GHSPFANLKSCCVPTKLRPMSMLYDDGQNIKKDIQNMIVEECGC 425  
P CC P + + +++ YY G+N+ K+ I+N I CGC  
Sbjct 199621 NRIPL-----CCSPKERKDITITYYL-GRNVKKQTIRNFIPTHCGC 199740

Score = 49.3 bits (116), Expect = 3e-05, Method: Compositional matrix adjust.

Identities = 29/98 (30%), Positives = 50/98 (51%), Gaps = 11/98 (11%)  
Frame = -3

Query 328 VSFKDIGWNDWIIAPSGYHANYCEGECPSHIAGTSGSSLSFHSTVINHYMRGHSPFANL 387  
+ FKD+G N WI+ P + YC+G C I+ + SS+ + S IN + N+  
Sbjct 194419 MKFKDLGCN-WILRPKSFIFTYCKGTCTI--ISSFTRSSIIYGSMFINDIK-----KNI 194270

Query 388 KSCCVPTKLRPMSMLYDDGQNIKKDIQNMIVEECGC 425  
CC P ++++Y G+N+ +I++ + CGC  
Sbjct 194269 HICCAPVTRSINITIMYM-LGKNVKVSEIKDFLPSSCGC 194159

Score = 45.4 bits (106), Expect = 6e-04, Method: Compositional matrix adjust.  
Identities = 38/127 (30%), Positives = 54/127 (43%), Gaps = 14/127 (11%)  
Frame = +3

Query 299 QSEDPHRRRRRRGLECDGKVNICCKKQFFVVSFKDIGWNDWIIAPSGYHANYCEGECPSHI 358  
+SE P R +R L+ D NI + + F D G WI++P YC G C I  
Sbjct 195378 ESELLP-RVKRDFLDIDAICNI---RSINIKFADYGM-KWILSPLSTVLTICYGICS--I 195536

Query 359 AGTSGSSLSFHSTVINHYMRGHSPFANLKSCCVPTKLRPMSMLYDDGQNIKKDIQNM 418  
+ +SL + + + N H P + CC P R + Y G+NI I N  
Sbjct 195537 SSYQKTSLMYGTIITN-----HMPDNTIPQCCYPIT-RSNFTIRYKVGRNIKTVDVINNF 195695

Query 419 IVEECGC 425  
+ EC C  
Sbjct 195696 MPLECAC 195716

>NC\_024446.1 Penguinpox virus isolate PSan92, complete genome  
Length=306862

Score = 45.4 bits (106), Expect = 5e-04, Method: Compositional matrix adjust.  
Identities = 30/97 (31%), Positives = 45/97 (46%), Gaps = 10/97 (10%)  
Frame = +1

Query 329 SFKDIGWNDWIIAPSGYHANYCEGECPSHIAGTSGSSLSFHSTVINHYMRGHSPFANLK 388  
S+ +G+ WI P G YC G C + G+ S + TV+ +Y +  
Sbjct 166051 SYVHLGYK-WIHEPRGIQFTYCYGTC---VMGSYDESSVIYGTVVVTNYISD-----KGIP 166203

Query 389 SCCVPTKLRPMSMLYDDGQNIKKDIQNMIVEECGC 425  
SCC P + +++ YY G+NI K I N + CGC  
Sbjct 166204 SCCSPKRREDITISYYR-GRNIEKHTIHNFMPTHCGC 166311

Score = 38.5 bits (88), Expect = 0.069, Method: Compositional matrix adjust.  
Identities = 24/77 (31%), Positives = 38/77 (49%), Gaps = 6/77 (8%)  
Frame = -2

Query 295 LQARQSEDPHRRRRRRGLECDGKVNICCKKQFFVVSFKDIGWNDWIIAPSGYHANYCEGEC 354  
L + + D+ ++R ++ N C + +++F+DIG WI+ P G YC GEC  
Sbjct 88719 LYSDDNVDYSFDIKKRSIQ---DSNYCKIYRKYINFRDIGLK-WILHPPGIDYGYCVGEC 88552

Query 355 PSHIAGTS--GSSLSFH 369  
S S S L+FH  
Sbjct 88551 TSFAYTDSFLYSLLA FH 88501

>NC\_024447.1 Pigeonpox virus isolate FeP2, complete genome  
 Length=282356

Score = 40.0 bits (92), Expect = 0.026, Method: Compositional matrix adjust.  
 Identities = 25/77 (32%), Positives = 39/77 (51%), Gaps = 6/77 (8%)  
 Frame = -3

```

Query   295      LQARQSEDHPHRRRRRRGLECDGKVNICCKKQFFVFSFKDIGWNDWIIAPSGYHANYCEGEC   354
          L + + D+P  ++R ++      N C  + +++F+DIG  WI+ P G    YC GEC
Sbjct   87603    LYSDDNVDYPLDIKKRSVQ---DSNDCRIYRKYINFRDIGLK-WILHPPGIDYGYCVGEC   87436

Query   355      PSHIAGTS--GSSLSFH   369
          S      S      S L+FH
Sbjct   87435    TSFAYTDSFLYSLLA FH   87385
  
```

Lambda      K            H            a            alpha  
 0.319      0.134      0.408      0.792      4.96

Gapped  
 Lambda      K            H            a            alpha      sigma  
 0.267      0.0410      0.140      1.90      42.6      43.6

Effective search space used: 26323977680

## 9. Human Complement factor D (Adipsin)

Query= sp|P00746|CFAD\_HUMAN Complement factor D OS=Homo sapiens GN=CFD PE=1  
 SV=5

Length=253

| Sequences producing significant alignments: |                                                         | Score  | E     |
|---------------------------------------------|---------------------------------------------------------|--------|-------|
|                                             |                                                         | (Bits) | Value |
| NC_005906.1                                 | Neodiprion lecontei NPV, complete genome                | 112    | 3e-27 |
| NC_008252.1                                 | Neodiprion abietis NPV, complete genome                 | 112    | 5e-27 |
| NC_005905.1                                 | Neodiprion sertifer NPV, complete genome                | 105    | 1e-24 |
| NC_007346.1                                 | Emiliana huxleyi virus 86, complete genome              | 70.5   | 8e-13 |
| NC_019495.1                                 | Cyprinid herpesvirus 2 strain ST-J1, complete genome    | 65.5   | 4e-11 |
| NC_033174.1                                 | Hubei virga-like virus 23 strain mosHB236486 RdRp, h... | 62.4   | 4e-10 |
| NC_009127.1                                 | Cyprinid herpesvirus 3, complete genome                 | 50.8   | 3e-06 |
| NC_019491.1                                 | Cyprinid herpesvirus 1 strain NG-J1, complete genome    | 48.9   | 1e-05 |
| NC_033829.1                                 | Kallithea virus isolate DroEU46_Kharkiv_2014, compl...  | 40.4   | 0.006 |

>NC\_005906.1 Neodiprion lecontei NPV, complete genome  
 Length=81755

Score = 112 bits (281), Expect = 3e-27, Method: Compositional matrix adjust.  
 Identities = 67/229 (29%), Positives = 111/229 (48%), Gaps = 4/229 (2%)  
 Frame = -2

```

Query   25      RILGGREAEAHARPYMASVQLNGAHLCCGGVLVAEQWVLSAAHCLEDAADGKVQVLLGAHS   84
          RI+GG          PY S+Q+  H+CG  ++++ W+L+AAHC+      ++ G+
Sbjct   4363    RIVGGSPTSIDEIPYQVSLQVYSTHICGASIIISDSWILTAAHCITYPVT-LYRIRSGSTL   4187
  
```



Query 85 LSQPEPSKRLYDVLRAVPHPPDSQPDTIDHDL LLLQLSEKATLGPAVRPLPWQVRD RDVAP 144  
R+ + + +D+ LL+L+ LG +P + +  
Sbjct 4186 SISGGVVT RVESAYVHHAYYTNNY GIPVNDIAL LKLTNSLILGITSAAVPLYDKNEIIPD 4007

Query 145 GTLCDVAGWGIVNHAGRRPDSLQHVLLPVLDRATCNRRTHHDGAI TERLMCAES--NRRD 202  
+ + GWG + G P L V +PV+ +TC + + G + E +CA S +D  
Sbjct 4006 ESTAXITGWGTLTENGNTPVVLYSVNIPVIPTSTCAQIFRNWGGLPENQICAASPGGGKD 3827

Query 203 SCKGDSGGPLVCGGVLEGVVTS GSRVCGNRKKPGIYTRVASYAAWIDSV 251  
+C+GDSGGP+V L G+V+ G+ CG PG+YT VA+Y WI S+  
Sbjct 3826 ACQGDSGGPMVVDRLAGIVSWGNG-CGRNGWPGVYTEVAAYREWITSL 3683

>NC\_008252.1 Neodiprion abietis NPV, complete genome  
Length=84264

Score = 112 bits (279), Expect = 5e-27, Method: Compositional matrix adjust.  
Identities = 70/238 (29%), Positives = 113/238 (47%), Gaps = 22/238 (9%)  
Frame = +3

Query 25 RILGGREAEAHARPYMASVQLNGAHL CGGVLVAEQWVLSAAHCLEDA A-----DGKVQV 78  
RI+GG PY S+Q+ H+CG ++++ W+++AAHC+ G  
Sbjct 25179 RIVGGSPTSIDEIPYQVSLQVYSTHICGASII SDSWIVTAAHCITYPVTLYRIRSGSTLS 25358

Query 79 LLGAHLSLQPEPSK---RLYDVLRAVPHPPDSQPDTIDHDL LLLQLSEKATLGPAVRPLPW 135  
+ G ++Q E + Y +P +D+ LL+L+ LG +P  
Sbjct 25359 ISGG-VVTQVESAYVHHAYYTNNY GIPV-----NDIAL LKLTNSLILGITSAAVPL 25508

Query 136 QRVDRDVAPGTLCDVAGWGIVNHAGRRPDSLQHVLLPVLDRATCNRRTHHDGAI TERLMC 195  
+ + + + GWG + G P L V +PV+ +TC + G + E +C  
Sbjct 25509 YNKNEIIPDESTAITGWGTLTENGNTPVVLYSVNIPVIPTSTCAQIFRSWGGLPENQIC 25688

Query 196 AES--NRRDSCKGDSGGPLVCGGVLEGVVTS GSRVCGNRKKPGIYTRVASYAAWIDSV 251  
A S +D+C+GDSGGP+V L G+V+ G+ CG PG+YT VA+Y WI S+  
Sbjct 25689 AASPGGGKDACQGDSGGPMVVDRLAGIVSWGNG-CGRNGWPGVYTEVAAYREWITSL 25859

>NC\_005905.1 Neodiprion sertifer NPV, complete genome  
Length=86462

Score = 105 bits (261), Expect = 1e-24, Method: Compositional matrix adjust.  
Identities = 68/232 (29%), Positives = 107/232 (46%), Gaps = 10/232 (4%)  
Frame = +1

Query 25 RILGGREAEAHARPYMASVQLNGAHL CGGVLVAEQWVLSAAHCLEDAADGKVQVLLGAHS 84  
RI+GG PY S+Q+ H+CGG +++E+W+++AAHC+ + + +  
Sbjct 5422 RIVGGNPTSIDDVPYQVSLQVFSTHICGGSIISEKWI VTAHCITYPV--SLYKIRTGST 5595

Query 85 LSQPEPSKRLYDVLRAVPHPPDSQPDTID---HDL LLLQLSEKATLGPAVRPLPWQVRD RD 141  
LS + DV + H + +D+ LLQL LG +  
Sbjct 5596 LSTC--GGVSDVESII VHHKYATNNYGVVNDIAL LQLKNSLILGITS DAVGLYDYGES 5769

Query 142 VAPGTLCDVAGWGIVNHAGRRPDSLQHVLLPVLDRATCNRRTHHDGAI TERLMCAES--N 199  
+ + V GWG + G P L V +P++ C G + E +CA +  
Sbjct 5770 IPSEFGLVLTGWGTLTENGNTPVVLYSVSIPIIPTDVCANIFQSWGGLPENQICAAAPGG 5949

Query 200 RRDSCCKGDSGGPLVCGGVLEGVVTS GSRVCGNRKKPGIYTRVASYAAWIDSV 251  
+D+C+GDSGGPLV L G+V+ G+ CG PG YT +A + WI S+  
Sbjct 3826 ACQGDSGGPMVVDRLAGIVSWGNG-CGRNGWPGVYTEVAAYREWITSL 3683

Sbjct 5950 GKDACQGDSGGPLVVDNRLAGIVSWGNG-CGRTGWPAYTEIAPFRHWILSL 6102

>NC\_007346.1 Emiliana huxleyi virus 86, complete genome  
Length=407339

Score = 70.5 bits (171), Expect = 8e-13, Method: Compositional matrix adjust.  
Identities = 64/270 (24%), Positives = 109/270 (40%), Gaps = 62/270 (23%)  
Frame = -3

Query 34 AHARPYMASVQLNGAHLCCGGVLVAEQWVLSAAHCL-----EDAADGKVQVL-----LG 81  
+H+ P A+ N H CGG L+ +WVL+AAHC+ ED + ++ + +G  
Sbjct 303183 SHSDPDSAA---NSPHYCGGTLINNRWVLTAAHCCIYGHGREDTLEDSIKYIKEYHHRIG 303013

Query 82 AHSLSQPEPSKRLYDVLRAVPHPSQPDTIDHDLQLSEKATLGPAVRPLP-----W 135  
A + S + + +P+ +T+++D+ LL+L + A +P+ W  
Sbjct 303012 AKKSHEENISGDEFGIRNVIVYPNYNKNLTLENDIALLELDREVGTDIA-KPMKVNSSKSW 302836

Query 136 QRVDRDVAP-----GTLCDVAGWGIVNHAGRRPDSL---QHVLLPVL 174  
DV + AGWG + ++ + L  
Sbjct 302835 SSQTEDVVTVDVQPKSQIFTDGNIMIRNSSVIAAGWGKTKMSDTHAATVLKTTDLTLVAT 302656

Query 175 DRATC-----NRRTHHDGAIATERLMCAE--SNRRDCKGDSGGPLVC----GGVL 218  
D C R H +T++ +CA ++ R C+GDSGGPL VL  
Sbjct 302655 DAGQCVPISSFGAPGTRSGIH---LTDQCICASGGNSNRGICQGDSGGPLFVHDGDTNVL 302485

Query 219 EGVVTSGSRVCGNRKKPGIYTRVASAAWI 248  
G+ + + CG P ++TR +Y WI  
Sbjct 302484 IGISSFVAMPCGMANTPDVFTRTDTYTDWI 302395

Score = 70.5 bits (171), Expect = 9e-13, Method: Compositional matrix adjust.  
Identities = 55/193 (28%), Positives = 83/193 (43%), Gaps = 22/193 (11%)  
Frame = -1

Query 25 RILGGREAEAHARPYMASVQLNGAHLCCGGVLVAEQWVLSAAHCLLEDAADGKVQVLLGAHS 84  
I+ G +A+ P S+Q G H CG VL+++ + LSAHC D D V+ G +  
Sbjct 389621 HIINGVDADISGYPSSLSMQAIGQHFCGAVLISDYALSAAHCF-DTLDFTGIVMAGGKT 389445

Query 85 LSQPEPSKRLYDVLRAVPHPSQPDTIDHDLQLSEKATLGPAVRPLPWQRVD---RD 141  
K ++ A H +I +D+ +++L+ PLP+ D  
Sbjct 389444 NLNSNGGKSVF-AESAYLHASYSISSIMNDIAVIKLS-----PLPFGFADFATATS 389295

Query 142 VAPGTLCDVAGWGIVNHAGRRPDSLQHVLLPVLDRATCNRRTHHDGAIATERLMCAESNRR 201  
VA GWG+ + G+ LQ V TC D A+ ++C +S  
Sbjct 389294 VAENEDVTSVWGGLTSPNGKSSMILQSTEQRVYADNTC-----DAALIGTVVCTKSPTL 389133

Query 202 D--SCKGDSGGPL 212  
D +C GDSGG L  
Sbjct 389132 DTTTCNGDSGGGL 389094

Score = 62.0 bits (149), Expect = 6e-10, Method: Compositional matrix adjust.  
Identities = 59/198 (30%), Positives = 88/198 (44%), Gaps = 24/198 (12%)  
Frame = -3

Query 25 RILGGREAEAHARPYMASVQLN---GAHLCCGGVLVAEQWVLSAAHCLLE-DAADGKVQVLL 80  
RI+GG + H Y A+V LN AH+CGG L+ +WV++AAHC+ D + G + L

Sbjct 140577 RIIGGDDI--HITEYPATVSLNVYKTAHICGGTLIGSRWVVTAAHNCINPDNSPGFYSINL 140404

Query 81 GAHSLSQPEPSKRLYDVLRAVPHPSQPDTIDHDLQLSEKATLGPVAVRPLPWQRVDR 140  
+ + + + Y V + V HP+ I D+ +L+L T L + +

Sbjct 140403 NSTFIG--DDALVDYTVKQYVIHPEYDETKITS DIAIALELDRDVTY-----LAKKAILS 140248

Query 141 DVAPGTLCDV--AGWGIVNHAGRRPDSLQHVLLPVLDLDRATC--NRRTHHDGAIATERLMCA 196  
P DV GWG++ + G L L T N + H D ++C

Sbjct 140247 TTQPTVIGIDVHTVGVGVIAYDGGNNGYLSAKLQYTNGVVTSP LNCQIHED---RPGIVCM 140077

Query 197 ESNRRDS--CKGDSGGPL 212  
+ R DS C GDSG L

Sbjct 140076 DP-REDSTTCNGDSGTGL 140026

Score = 59.3 bits (142), Expect = 4e-09, Method: Compositional matrix adjust.  
Identities = 62/224 (28%), Positives = 93/224 (42%), Gaps = 25/224 (11%)  
Frame = +2

Query 48 AHLCCGGVLVAEQWVLSAAHCLEDAADGKVQVLLGAHSLSQPEPSKRLYDVLRAVPHPSQ 107  
+H CGG L+ ++VL+A HC D + ++ + + + Y V R++ HP

Sbjct 16208 SHYCGGTLIHPKYVLTAGHCPVRVDDSVRIGSIYSYGNNDNNSYDYSVKRSIRHPSYN 16387

Query 108 PDTIDHDLQLSEKA---TLGPVAVRPLPWQRVDRDVAPGT-----LCDVAGWGIVNH 158  
+T HDL+L++L E+ P + D P GWG

Sbjct 16388 GNTAQHDLMVELKEEVPAAHIATPMIVNSDQGD DDPHFTPTNAAINHEYMTATGWGKTRD 16567

Query 159 AGRRPDSLQHVLLPV-LDRATC-NRRTHHD-----GAI--TERLMCAESNRRDS-CKGDS 208  
P L+ L V L+ TC N + H G I + +CA N+ D+ C GDS

Sbjct 16568 G--NPLILKSAKLVELNTNTCVNTSSMHS LDNFPQIGLSYTNICATGNKND AICNGDS 16741

Query 209 GGPLV----CGGVLEGVVTSGSRVCGNRKKPGIYTRVASYAAWI 248  
GGPL + GV + CG + +P + RV Y WI

Sbjct 16742 GGPLFKTYDGKKT VVGVSFFVILPCGLKGE PDAFVRVGIYTDWI 16873

Score = 57.4 bits (137), Expect = 2e-08, Method: Compositional matrix adjust.  
Identities = 58/202 (29%), Positives = 89/202 (44%), Gaps = 28/202 (14%)  
Frame = -3

Query 45 LNGAHLCCGGVLVAEQWVLSAAHC--LEDAADGKVQVLLGAHSLSQPEPSKRLYDVLRAVP 102  
LN C GVLV++QWVL+AAHC A+ G V SLS+ P+ V +

Sbjct 148380 LNNTPYCTGVLVSDQWVLTAAHCSGANPASPGDVIRYGTQDSL SKKTPTTTAV-VKKVYT 148204

Query 103 HPDSQPDTIDH-DLQLSEKATLGPVAVRPLPWQRVDRDVAPGTLCDVAGWGIVNHAGR 161  
HP T DL LL+L ++ T + P+ + GT AGWG + R

Sbjct 148203 HPGYMGITKGGIDLALLKLDKRIT---TISPMSFLDDQSGYVVGTT LKQAGWGSKDIDAR 148033

Query 162 RP-----DSLQHV L-----LPVLDLDRATCNRRTHHDGAIATERLMCAESNRRDSCKGDSG 209  
++ + +L PV+ + N ++ T+ ++ E N + + KGDSG

Sbjct 148032 HNMFSITSGLN TYRKILRSNEAPVISQKQYNSINEYEN--TKYIVNFEEN-KGTNKGDSG 147862

Query 210 GPLVC-----GGVLEGVVTSG 225  
PL V+ G+++SG

Sbjct 147861 SPLFLTADKNKNVVGILSSG 147796

>NC\_019495.1 Cyprinid herpesvirus 2 strain ST-J1, complete genome

Length=290304

Score = 65.5 bits (158), Expect = 4e-11, Method: Compositional matrix adjust.  
Identities = 67/225 (30%), Positives = 96/225 (43%), Gaps = 53/225 (24%)  
Frame = -2

```
Query 25 RILGGREAEAHARPYMASVQLNGAHLCCGGVLVAEQWVLSAAHCLEDA---ADGKVQVLLG 81
+I+GG A A PYM + N LCGG L VL+AAHC + K++V G
Sbjct 164201 KIMGGMTAIA-IPPYMGMITSNANVLCGGTLFNSTHVLTAHCCINGMVRTFDKLEVTFG 164025

Query 82 AHSLSQPEPSKRLYDV-----LRAVPHPDSQPDTIDH-----DLLLL 118
+S+ KRL++ R PD + + D+ L+
Sbjct 164024 LYSV-----KRLFQGVVRYRVKACHFYAPDFLQYVKVLLLESPVDQLFNYHGWDITLM 163863

Query 119 QLSEKATLGPVAVRPLPWQRVDRDVPAGT-LCDVAGWG----IVNHAGRRPDSLQHVLLPV 173
+L E P + P + A G C VAG+G + + G L+ V +P+
Sbjct 163862 ELHE-----PVLYREPVKLFKPTAEHGRGECLVAGYGSRGYLDGDDYGIPLKTVHVPL 163698

Query 174 LDRATCNRRTHHDGAIT----ERLMCAESNRRDSCCKGDSGGPLVC 214
+D+ATC DG T +CA S D+C GDSGGPL+C
Sbjct 163697 VDKATC-----DGEFTVGSPPNTLCAGSLDHDACNGDSGGPLMC 163581
```

>NC\_033174.1 Hubei virga-like virus 23 strain mosHB236486 RdRp, hypothetical protein, putative glycoprotein, and hypothetical protein genes, complete cds  
Length=14639

Score = 62.4 bits (150), Expect = 4e-10, Method: Compositional matrix adjust.  
Identities = 63/227 (28%), Positives = 93/227 (41%), Gaps = 37/227 (16%)  
Frame = +2

```
Query 25 RILGGREAEAHARPYMASVQLNGAHLCCGGVLVAEQWVLSAAHCLEDAADGKVQVLLGAHS 84
RI+ G E Y + G +C V V+ ++AAHC H
Sbjct 12677 RIVNG---EPSTDLYTHPLFYQGTFICTAVAVSPTTAITAHC-----THG 12805

Query 85 LSQPEPSKRLYDVLRAVPHPDSQPDTIDHLLLLQLSE-KATLGPVAVRPLPWQRVDRDVA 143
+ L V R V HP +P T+ +D+ LL SE + +G P V
Sbjct 12806 YTNQFYISDL-RVTRFVTHPSFEPLTLANDISLLFASEFQFYVGLYYSPLPNSPVTVVG 12982

Query 144 PGTLCDVAGWGIVNHAGRRPDSLQHVLLPVLDRATCNRRTHHDGAITERLMCA--ESNRR 201
G+ C + V +G + + VL+ C +R + +CA + +
Sbjct 12983 YGSTC----YKCVGTSGVQRSA-----VLEIKICPQRF----TVAPNTLCAGLDDGSK 13117

Query 202 DSCCKGDSGGPLVCGGVLEGVVTSRSRVCNRRKPKGIYTRVASAAMI 248
DSC+GDSGGPL G L +V+ G +C PG+YT V SY +I
Sbjct 13118 DSCQGDGGPLFYEGKLLAIVSWG-YMCAQPLTPGVYTVVESYQNFI 13255
```

>NC\_009127.1 Cyprinid herpesvirus 3, complete genome  
Length=295146

Score = 50.8 bits (120), Expect = 3e-06, Method: Compositional matrix adjust.  
Identities = 66/270 (24%), Positives = 100/270 (37%), Gaps = 74/270 (27%)  
Frame = -1

```
Query 25 RILGGREAEAHARPYMASVQLNGAHLCCGGVLVAEQWVLSAAHCLEDAADGK---VQVLLG 81
+++GG A A PY+ V N CG L L+A HC + K V V G
```

Sbjct 174237 KLMGGMVAIA-VPPYLGVSDNLGLFCGATLYNATHALTAGHCCINGRTQKLDVVVAFG 174061

Query 82 AHLSLQPEPSKRLYDVLRAVPHPSQPDTIDHDL-----LLQLSEKATLGPVAVRPL 133  
S+++ LY QP + H ++ + + + P

Sbjct 174060 LFSITE-----LY-----QPGVVRHKVACHFYAPDFMARARRILADPIAELF 173932

Query 134 PWQ-----RVDRDVAPG-----TLCDVAGWGIVNHA---GRRPDSLQH 168  
W +DR AP C VAG+G+ + G L+H

Sbjct 173931 NWNQYDVALMELDRPAAPSKKPVLEFERGEHEGEECLVAGYGLRGYPVVLGANMAELEH 173752

Query 169 -----VLLPVLD RATCNRRTHHDGAI TERL-----MCAESNRRDSCKGDSGGPLVCGGVLE- 219  
+ +P++D+ C+R + ER +CA S D C GDSGGPL+C +

Sbjct 173751 PVKTIHVPLVDKFRCDRD-----MPERTPPFTVCAGSFDHVDVCLGDSGGPLMCESSRDH 173590

Query 220 -----GVVTSGSRVCGNRKKPGIYTRVASY 244  
G+V+ G R +YT V +Y

Sbjct 173589 RPRQLGIVSYGRPCVRGRNGLSVYTDVFRAY 173500

>NC\_019491.1 Cyprinid herpesvirus 1 strain NG-J1, complete genome  
Length=291144

Score = 48.9 bits (115), Expect = 1e-05, Method: Compositional matrix adjust.  
Identities = 62/239 (26%), Positives = 99/239 (41%), Gaps = 37/239 (15%)  
Frame = -2

Query 39 YMASVQLNGAHLCCGGVLVAEQWVLSAAHCLEDA---ADGKVQVLLGAHSL-----SQPEPS 91  
Y+A + +NG +CGG L VL+A HC + A ++QV LG +++ S+

Sbjct 156644 YIAMITVNGELICGGTFLNASHVLTAGHCCVNPVRATSEMQVSLGLYNVLDLHSGKNRR 156465

Query 92 KRLYDVLRAVPHPSQPDTI-----DHDLLLLQLSE-----KATLGPVAVRP 132  
R+ P+ ++ +I +D+ LL+LS+ L ++R

Sbjct 156464 HRVKACHFYAPNFINRTRSIYALNQELFNKNGYDIALLELSDPQANQDVSPVKLFESLRE 156285

Query 133 LP-WQRVDRDVAPGTLCDVAGWGIVNHAGRRPDSLQHVLLPVLD RATCNRRTHHDGAITE 191  
P +QR + G G P HV P+ + CN I

Sbjct 156284 SPAFQRECLVIGYGRHGVGGGGDAFLEDYVVPKTVHV--PLRSPVCN--IAFGKPIPS 156117

Query 192 RLMCAESNRRDSCKGDSGGPLVCGGVLEGV-----VTSGSRVCGNRKKP-GIYTRVASY 244  
+CA S D+C GDSGGPL C G +G+ + S + C +R + +YT V +

Sbjct 156116 NTLCAGSQGHDACTGDSGGPLFCEGQDDGIPRQVGIVSYGKPCESRDEGLSVYTDVVRGF 155940

>NC\_033829.1 Kallithea virus isolate DrosEU46\_Kharkiv\_2014, complete genome  
Length=152388

Score = 40.4 bits (93), Expect = 0.006, Method: Compositional matrix adjust.  
Identities = 41/167 (25%), Positives = 70/167 (42%), Gaps = 14/167 (8%)  
Frame = +1

Query 51 CGGVLVAEQWVLSAAHCLEDAADGKVQVLLGAHSLQPEPSKRLYDVLRAVPH-----DS 106  
C G L+ Q VL++A CL DAA+ + L ++ + + + + + HP

Sbjct 56677 CAGSLIDRQHVLTSASCL-DAANENRSIFLIMGVNINDNRRRVSEAIKIVHPLYNNKD 56853

Query 107 QPDTIDHDL LLLQLSEKA-TLGPVAVRPLPWQRVDRDVAPGTLCDVAGWGIVNHAGRRPDS 165  
P D LL ++ E + L PA+ L + + G+G +N G

Sbjct 56854 YPYAYDVALLRITVEYSRNLPQAI--LAGKSTTEQSMFELPLYILGYGDIN-LGPNNQV 57024

Query 166 LQHVLLPVLDRATCNRRTHHDGAITERLMCAESNRRDSCKGDSGGPL 212  
 L++ + + C+ TE +CA +N C GD GGP+  
 Sbjct 57025 LKYSSAKLRKMSECDEYNK-----TESTLCARANPGSPCLGDEGGPV 57150

Lambda K H a alpha  
 0.319 0.136 0.431 0.792 4.96

Gapped  
 Lambda K H a alpha sigma  
 0.267 0.0410 0.140 1.90 42.6 43.6

Effective search space used: 12058904868

## 10. Human Resistin

Query= sp|Q9HD89|RETN\_HUMAN Resistin OS=Homo sapiens GN=RETN PE=1 SV=1

Length=108

|                                                    |                                       | Score         | E            |
|----------------------------------------------------|---------------------------------------|---------------|--------------|
| <b>Sequences producing significant alignments:</b> |                                       | <b>(Bits)</b> | <b>Value</b> |
| NC_030901.1                                        | Gordonia phage ClubL, complete genome | 37.0          | 0.008        |

>NC\_030901.1 Gordonia phage ClubL, complete genome  
 Length=92618

Score = 37.0 bits (84), Expect = 0.008, Method: Compositional matrix adjust.  
 Identities = 25/77 (32%), Positives = 32/77 (42%), Gaps = 9/77 (12%)  
 Frame = -2

Query 36 AGSLIF---RAISSIGLEQCQSVTSRGDLATCPRGFAVTGCTC-----GSACGSWDVRAET 87  
 AG+L+ R +S + LE V RGD+A P+G A G +W VR E  
 Sbjct 56569 AGALVLEFERQLSRL-LESGRVQDRGDVAEDPKGIARVVRHHLHRRGEPAAAWRVTER 56393

Query 88 TCHCQCAGMDWTGARCC 104  
 A W G R C  
 Sbjct 56392 PRRSARAASRWAGRRSC 56342

Lambda K H a alpha  
 0.323 0.131 0.439 0.792 4.96

Gapped  
 Lambda K H a alpha sigma  
 0.267 0.0410 0.140 1.90 42.6 43.6

Effective search space used: 2144953500

## 11. Human Interleukin-6

Query= sp|P05231|IL6\_HUMAN Interleukin-6 OS=Homo sapiens GN=IL6 PE=1 SV=1

Length=212

Score E

Sequences producing significant alignments: (Bits) Value

NC\_009333.1 Human herpesvirus 8, complete genome 77.4 1e-15

>NC\_009333.1 Human herpesvirus 8, complete genome  
Length=137969

Score = 77.4 bits (189), Expect = 1e-15, Method: Compositional matrix adjust.  
Identities = 41/158 (26%), Positives = 77/158 (49%), Gaps = 0/158 (0%)  
Frame = -3

Query 55 KQIRYILDGISALRKETCNKSNMCESSKEALAENNLNLPKMAEKDGCQSGFNEETCLVK 114  
+++ ++L I ++ C ++ +C+ E A +L LP + + D C GFNE +CL K  
Sbjct 17733 QRLNWMLWVIDECFRDLCYRTGICKGILEPAAIFHLKLPAINDTDHCGLIGFNETSCLKK 17554

Query 115 IITGLLEFEVYLEYLQNRFESSEEQARAVQMSTKVLIQFLQKKAKNLDAITTPDPTNAS 174  
+ G EFEV ++L F S +++ TK L +Q++ L P +  
Sbjct 17553 LADGFFEFVLFKFLTTEFGKSVINVDVMEELLTKTLGWDIQEELNKLTKTHYSPPKFD RG 17374

Query 175 LLTKLQAQNQWLQDMTTHLILRSFKEFLQSSLRALRQM 212  
LL +LQ W++ + +L + ++F ++R L +  
Sbjct 17373 LLGRLQGLKYWVRHFASFYVLSAMEKFAGQAVRVLNSI 17260

Lambda K H a alpha  
0.315 0.127 0.349 0.792 4.96

Gapped  
Lambda K H a alpha sigma  
0.267 0.0410 0.140 1.90 42.6 43.6

Effective search space used: 8725390488

## **12. Human Fibronectin type III domain-containing protein 5**

Query= sp|Q8NAU1|FNDC5\_HUMAN Fibronectin type III domain-containing protein  
5 OS=Homo sapiens GN=FNDC5 PE=1 SV=3

Length=212

Sequences producing significant alignments: (Bits) E Value

NC\_004166.2 Bacteriophage SPP1 complete nucleotide sequence 38.9 0.012

>NC\_004166.2 Bacteriophage SPP1 complete nucleotide sequence  
Length=44010

Score = 38.9 bits (89), Expect = 0.012, Method: Compositional matrix adjust.  
Identities = 29/95 (31%), Positives = 44/95 (46%), Gaps = 9/95 (9%)  
Frame = +3

Query 34 PSAPVNVTVRHLKANSVVSVDVLEDEVVIGFAISQKKDVRMLRFIQEVNTTTRSCALW 93  
P+AP N+T +S V WD +E +KK + N TT S L  
Sbjct 11010 PNAPQNLTYT-ATTDSVTVKWDAVEGADSYNVYRGAEEK-----LDANVTTTSHTLT 11162

```

Query 94      DLEEDTEYIVHVQAIISIQQSPASEPVLFKTPREA 128
              ++ DT+  V+V A++  G+SP S+ V    P E+
Sbjct 11163  GIQPDTQLTVNVAAVNAGGESPMISQIVTKTLPAES 11267

```

```

Lambda      K          H          a          alpha
0.317      0.130      0.373      0.792      4.96

```

```

Gapped
Lambda      K          H          a          alpha      sigma
0.267      0.0410     0.140      1.90       42.6       43.6

```

Effective search space used: 8725390488

### **13. Human Fibroblast growth factor 21**

```

Query= sp|Q9NSA1|FGF21_HUMAN Fibroblast growth factor 21 OS=Homo sapiens
GN=FGF21 PE=1 SV=1

```

Length=209

| <b>Sequences producing significant alignments:</b> |                                                                | <b>Score</b>  | <b>E</b>     |
|----------------------------------------------------|----------------------------------------------------------------|---------------|--------------|
|                                                    |                                                                | <b>(Bits)</b> | <b>Value</b> |
| <b>NC_006549.1</b>                                 | <b>Singapore grouper iridovirus, complete genome</b>           | <b>46.2</b>   | <b>5e-05</b> |
| <b>NC_001875.2</b>                                 | <b>Orgyia pseudotsugata MNPV, complete genome</b>              | <b>45.1</b>   | <b>1e-04</b> |
| <b>NC_021924.1</b>                                 | <b>Choristoneura rosaceana alphabaculovirus, complete g...</b> | <b>38.1</b>   | <b>0.024</b> |
| <b>NC_013953.1</b>                                 | <b>Lymantria xyliana MNPV, complete genome</b>                 | <b>37.0</b>   | <b>0.059</b> |

```

>NC_006549.1 Singapore grouper iridovirus, complete genome
Length=140131

```

```

Score = 46.2 bits (108), Expect = 5e-05, Method: Compositional matrix adjust.
Identities = 30/101 (30%), Positives = 46/101 (46%), Gaps = 6/101 (6%)
Frame = +1

```

```

Query 56      QTEAHLEIREDGTVGGAADQSPESELLQLKALKPGVIQILGVKTSRFLCQRPDQALYGLSLH 115
              +T  LE+      GG  QS  + L LK+++ G I I G      ++C  +GA+
Sbjct 125050  KTNFMLEVNGTAVSGGTDKQSQTAKLTLKSVRAGQIVIKG-SIGGYVCMRNGAVSAKTT 125226

```

```

Query 116     FDPEACSFRELLLEDGYNVYQSEAHGLP-----LHLPGNKS 151
              +   C F E LL + YN Y + H P      +HL  +K+
Sbjct 125227  YVQSDCVFNETLLPNNYNSYSAAEHLNPETRAMMHLAIDKA 125349

```

```

>NC_001875.2 Orgyia pseudotsugata MNPV, complete genome
Length=131995

```

```

Score = 45.1 bits (105), Expect = 1e-04, Method: Compositional matrix adjust.
Identities = 25/76 (33%), Positives = 41/76 (54%), Gaps = 2/76 (3%)
Frame = +3

```

```

Query 60      HLEIREDGTVGGAA-DQSPESELLQLKALKPGVIQILGVKTSRFLCQRPDQALYGLSLHFDP 118
              +L +R DGTVGG      S +++LQ A+ G I +      + ++C  GA+Y S
Sbjct 22833  YLAVRSDGTVGGTTYASSLDTVLQRIAHGRILLRNAVSCMYVCLDRCGAMYASAALSS 23012

```



Query 119 EACSFRELLLEDGYNV 134  
 + C E++LE+ Y+V  
 Sbjct 23013 D-CILNEVMLENNYDV 23057

>NC\_021924.1 Choristoneura rosaceana alphabaculovirus, complete genome  
 Length=129052

Score = 38.1 bits (87), Expect = 0.024, Method: Compositional matrix adjust.  
 Identities = 23/77 (30%), Positives = 39/77 (51%), Gaps = 5/77 (6%)  
 Frame = -2

Query 60 HLEIREDGTVGGAADQSPESLLQLKALKPGVIQILGVKTSRFLCQRPDGALY--GSLHFD 117  
 +L +R DGTVGG S +++LQ + + + +C GA+Y G+L D  
 Sbjct 108408 YLAVRPDGTVGGTTHASMDTILQRVGYHKSRLVLLQNAFSCMHVCLDRCGAMYASGALSMD 108229

Query 118 PEACSFRELLLEDGYNV 134  
 C E++L++ Y+V  
 Sbjct 108228 ---CILNEVILDNNYDV 108187

>NC\_013953.1 Lymantria xylinea MNPV, complete genome  
 Length=156344

Score = 37.0 bits (84), Expect = 0.059, Method: Compositional matrix adjust.  
 Identities = 35/126 (28%), Positives = 55/126 (44%), Gaps = 15/126 (12%)  
 Frame = -2

Query 9 EHSGLWVSVLAGLLLGAQAHPIDSSPLLQFGGQVRQRYLYTDDAQQTEAHLEIREDGT 68  
 H+ + + L L LGA +A P+ S+ L G RQ L +GT  
 Sbjct 146662 RHAQIMLVFLVVLALGA-RAFPLTASTGRLVQIGINRQ-----LLTCFSNGT 146525

Query 69 VGGAADQSPE-SLLQLKALKPGVIQILGVKTSRFLCQRPDGALYGSLHFDPEACSFRELL 127  
 VGG+ D+ + ++ + A+ P + I T F C G LY + + C+F E L  
 Sbjct 146524 VGGSTDERADGTVWRRWAVNPREVLIRSAATCAFAFLDCGFLYTAAETPNKECAFVEEL 146345

Query 128 LEDGYN 133  
 E+ Y+  
 Sbjct 146344 SENHYS 146327

|        |       |       |       |       |
|--------|-------|-------|-------|-------|
| Lambda | K     | H     | a     | alpha |
| 0.315  | 0.136 | 0.409 | 0.792 | 4.96  |

Gapped

|        |        |       |      |       |       |
|--------|--------|-------|------|-------|-------|
| Lambda | K      | H     | a    | alpha | sigma |
| 0.267  | 0.0410 | 0.140 | 1.90 | 42.6  | 43.6  |

Effective search space used: 8555249200

#### **14. Human Fibroblast growth factor 19**

Query= sp|095750|FGF19\_HUMAN Fibroblast growth factor 19 OS=Homo sapiens  
 GN=FGF19 PE=1 SV=1

Length=216

| Sequences producing significant alignments:                      | Score       | E            |
|------------------------------------------------------------------|-------------|--------------|
|                                                                  | (Bits)      | Value        |
| <b>NC_006549.1 Singapore grouper iridovirus, complete genome</b> | <b>46.2</b> | <b>6e-05</b> |

>NC\_006549.1 Singapore grouper iridovirus, complete genome  
Length=140131

Score = 46.2 bits (108), Expect = 6e-05, Method: Compositional matrix adjust.  
Identities = 26/85 (31%), Positives = 40/85 (47%), Gaps = 3/85 (4%)  
Frame = +1

```

Query   59      FLRIRADGVVDCARGQSAHSLLEIKAVLRRTVAIKGVHSVR-YLCMGADGKMQGLLQYSE  117
          L +   V      QS + L +K+V      + IKG S+ Y+CM +G +   Y +
Sbjct  125062  MLEVNGTAVSGGTDKQSQTAKLTLKSVRAGQIVIKG--SIGGYVCMRNGAVSAKTTYVQ  125235

```

```

Query   118      EDCAFEIIIIRPDGYNVYRSEKHRLP  142
          DC F E + P+ YN Y + +H P
Sbjct  125236  SDCVFNETLLPNNYNSYSAAEHLNP  125310

```

Score = 38.9 bits (89), Expect = 0.015, Method: Compositional matrix adjust.  
Identities = 21/57 (37%), Positives = 27/57 (47%), Gaps = 2/57 (4%)  
Frame = +2

```

Query   89      TVAIKGVHSVRYLCMGADGKMQGLLQYSEEDCAFEIII--RPDGYNVYRSEKHRLPV  143
          TV IK      Y+CM + G + G L      DC F E I + GY Y S+ H+ P
Sbjct  125645  TVTIKSASDNYYVCMYSGGTVYGRLGSLAADCEFTEHIDQKKHGYKSYSSKHHKAPT  125815

```

|        |       |       |       |       |
|--------|-------|-------|-------|-------|
| Lambda | K     | H     | a     | alpha |
| 0.323  | 0.138 | 0.432 | 0.792 | 4.96  |

|        |        |       |      |       |       |
|--------|--------|-------|------|-------|-------|
| Gapped |        |       |      |       |       |
| Lambda | K      | H     | a    | alpha | sigma |
| 0.267  | 0.0410 | 0.140 | 1.90 | 42.6  | 43.6  |

Effective search space used: 9067562664

## PART B: The results of the processed sequence search of the human proteins

### 1. Endothelin-2|49-69

Query= sp|P20800|49-69

Length=21

| Sequences producing significant alignments:                       | Score<br>(Bits) | E<br>Value   |
|-------------------------------------------------------------------|-----------------|--------------|
| <b>NC_006966.1</b> <b>Deerpox virus W-848-83, complete genome</b> | <b>30.0</b>     | <b>0.055</b> |

>NC\_006966.1 Deerpox virus W-848-83, complete genome  
Length=166259

Score = 30.0 bits (66), Expect = 0.055, Method: Compositional matrix adjust.  
Identities = 13/21 (62%), Positives = 15/21 (71%), Gaps = 0/21 (0%)  
Frame = -1

```
Query 1      CSCSSWLDKECVYFCHLDIIW  21
           C C + DKEC+ FC LDIIW
Sbjct 5168   CYCDTHDDKECMNFCELDIIW  5106
```

```
Lambda      K          H          a          alpha
    0.334    0.144    0.645    0.792    4.96
```

Gapped

```
Lambda      K          H          a          alpha    sigma
    0.267    0.0410   0.140    1.90    42.6    43.6
```

Effective search space used: 1818228804

### 2. Endothelin-1|53-90

Query= sp|P05305|53-90

Length=38

| Sequences producing significant alignments:                       | Score<br>(Bits) | E<br>Value   |
|-------------------------------------------------------------------|-----------------|--------------|
| <b>NC_006966.1</b> <b>Deerpox virus W-848-83, complete genome</b> | <b>31.2</b>     | <b>0.055</b> |

>NC\_006966.1 Deerpox virus W-848-83, complete genome  
Length=166259

Score = 31.2 bits (69), Expect = 0.055, Method: Compositional matrix adjust.  
Identities = 13/21 (62%), Positives = 15/21 (71%), Gaps = 0/21 (0%)  
Frame = -1

```
Query 1      CSCSSLMDKECVYFCHLDIIW  21
           C C + DKEC+ FC LDIIW
```

Sbjct 5168 CYCDTHDDKECMNFCELDIIW 5106

Lambda K H a alpha  
0.325 0.141 0.509 0.792 4.96

Gapped

Lambda K H a alpha sigma  
0.267 0.0410 0.140 1.90 42.6 43.6

Effective search space used: 2161487500

### **3. Endothelin-1|53-73**

Query= sp|P05305|53-73

Length=21

| <b>Sequences producing significant alignments:</b>         | <b>Score<br/>(Bits)</b> | <b>E<br/>Value</b> |
|------------------------------------------------------------|-------------------------|--------------------|
| <b>NC_006966.1 Deerpox virus W-848-83, complete genome</b> | <b>30.0</b>             | <b>0.059</b>       |

>NC\_006966.1 Deerpox virus W-848-83, complete genome  
Length=166259

Score = 30.0 bits (66), Expect = 0.059, Method: Compositional matrix adjust.  
Identities = 13/21 (62%), Positives = 15/21 (71%), Gaps = 0/21 (0%)  
Frame = -1

Query 1 CSCSSLMDKECVYFCHLDIIW 21  
C C + DKEC+ FC LDIIW  
Sbjct 5168 CYCDTHDDKECMNFCELDIIW 5106

Lambda K H a alpha  
0.336 0.143 0.587 0.792 4.96

Gapped

Lambda K H a alpha sigma  
0.267 0.0410 0.140 1.90 42.6 43.6

Effective search space used: 1818228804

### **4. Fibroblast growth factor 21|29-209**

Query= sp|Q9NSA1|29-209

Length=181

| <b>Sequences producing significant alignments:</b>                         | <b>Score<br/>(Bits)</b> | <b>E<br/>Value</b> |
|----------------------------------------------------------------------------|-------------------------|--------------------|
| <b>NC_006549.1 Singapore grouper iridovirus, complete genome</b>           | <b>46.2</b>             | <b>3e-05</b>       |
| <b>NC_001875.2 Orgyia pseudotsugata MNPV, complete genome</b>              | <b>45.8</b>             | <b>4e-05</b>       |
| <b>NC_021924.1 Choristoneura rosaceana alphabaculovirus, complete g...</b> | <b>38.5</b>             | <b>0.011</b>       |
| <b>NC_013953.1 Lymantria xyлина MNPV, complete genome</b>                  | <b>36.2</b>             | <b>0.061</b>       |

>NC\_006549.1 Singapore grouper iridovirus, complete genome  
Length=140131

Score = 46.2 bits (108), Expect = 3e-05, Method: Compositional matrix adjust.  
Identities = 30/101 (30%), Positives = 46/101 (46%), Gaps = 6/101 (6%)  
Frame = +1

Query 28 QTEAHLEIREDGTVGGAADQSPESELLQLKALKPGVIQILGVKTSRFLCQRPDGALYGLSH 87  
+T LE+ GG QS + L LK+++ G I I G ++C +GA+  
Sbjct 125050 KTNFMLEVNGTAVSGGTDKQSQTAKLTLKSVRAGQIVIKG-SIGGYVCMRNGAVSAKTT 125226

Query 88 FDPEACSFRELLLEDGYNVYQSEAHGLP-----LHLPGNKS 123  
+ C F E LL + YN Y + H P +HL +K+  
Sbjct 125227 YVQSDCVFNETLLPNNYNSYSAEHLNPETRAMHMLAIDKA 125349

>NC\_001875.2 *Orgyia pseudotsugata* MNPV, complete genome  
Length=131995

Score = 45.8 bits (107), Expect = 4e-05, Method: Compositional matrix adjust.  
Identities = 25/76 (33%), Positives = 41/76 (54%), Gaps = 2/76 (3%)  
Frame = +3

Query 32 HLEIREDGTVGGAA-DQSPESELLQLKALKPGVIQILGVKTSRFLCQRPDGALYGLSHFDP 90  
+L +R DGTVGG S +++LQ A+ G I + + ++C GA+Y S  
Sbjct 22833 YLAVRSDGTVGGTTYASSLDTVLQRIARIAHGRILLRNAVSCMYVCLDRCGAMYASAALSS 23012

Query 91 EACSFRELLLEDGYNV 106  
+ C E++LE+ Y+V  
Sbjct 23013 D-CILNEVMLENNYDV 23057

>NC\_021924.1 *Choristoneura rosaceana* alphabaculovirus, complete genome  
Length=129052

Score = 38.5 bits (88), Expect = 0.011, Method: Compositional matrix adjust.  
Identities = 23/77 (30%), Positives = 39/77 (51%), Gaps = 5/77 (6%)  
Frame = -2

Query 32 HLEIREDGTVGGAADQSPESELLQLKALKPGVIQILGVKTSRFLCQRPDGALY--GSLHFD 89  
+L +R DGTVGG S +++LQ + + + +C GA+Y G+L D  
Sbjct 108408 YLAVRPDGTVGGTTHASMDTILQRVGYHKSRLVLLQNAFSCMHVCLDRCGAMYASGALSMD 108229

Query 90 PEACSFRELLLEDGYNV 106  
C E++L++ Y+V  
Sbjct 108228 ---CILNEVILDNNYDV 108187

>NC\_013953.1 *Lymantria xylinea* MNPV, complete genome  
Length=156344

Score = 36.2 bits (82), Expect = 0.061, Method: Compositional matrix adjust.  
Identities = 21/69 (30%), Positives = 35/69 (51%), Gaps = 1/69 (1%)  
Frame = -2

Query 38 DGTVGGAADQSPE-SLLQLKALKPGVIQILGVKTSRFLCQRPDGALYGLHFDPEACSF 96  
 +GTVGG+ D+ + + + A+ P + I T F C G LY + + C+F  
 Sbjct 146533 NGTVGGSTDERADGTVWRRWAVNPREVLIIRSAATCAAFACLDCCGFLYTAAETPNKECAFV 146354

Query 97 ELLLEDGYN 105  
 E L E+ Y+  
 Sbjct 146353 EELSENHYS 146327

>NC\_001973.1 Lymantria dispar MNPV, complete genome  
 Length=161046

Score = 35.8 bits (81), Expect = 0.087, Method: Compositional matrix adjust.  
 Identities = 22/69 (32%), Positives = 34/69 (49%), Gaps = 1/69 (1%)  
 Frame = -2

Query 38 DGTVGGAADQSPE-SLLQLKALKPGVIQILGVKTSRFLCQRPDGALYGLHFDPEACSF 96  
 +GTVGG+ D+ + + + A KP + I T F+C G LY + + C F  
 Sbjct 152876 NGTVGGSTDERADGTAWRRWAAKPREVLIRSAATCAFVCLDDCGFLYTAAEAPNKECLFV 152697

Query 97 ELLLEDGYN 105  
 E L E+ Y+  
 Sbjct 152696 EELSENHYS 152670

Lambda K H a alpha  
 0.314 0.136 0.406 0.792 4.96

Gapped  
 Lambda K H a alpha sigma  
 0.267 0.0410 0.140 1.90 42.6 43.6

Effective search space used: 6332282712

**5. Fibroblast growth factor 19|25-216**

Query= sp|095750|25-216

Length=192

| <b>Sequences producing significant alignments:</b>               | <b>Score</b>  | <b>E</b>     |
|------------------------------------------------------------------|---------------|--------------|
|                                                                  | <b>(Bits)</b> | <b>Value</b> |
| <b>NC_006549.1 Singapore grouper iridovirus, complete genome</b> | <b>46.2</b>   | <b>4e-05</b> |

>NC\_006549.1 Singapore grouper iridovirus, complete genome  
 Length=140131

Score = 46.2 bits (108), Expect = 4e-05, Method: Compositional matrix adjust.  
 Identities = 25/84 (30%), Positives = 38/84 (45%), Gaps = 1/84 (1%)  
 Frame = +1

Query 35 FLRIRADGVVDCARGQSAHSLLEIKAVALLRTVAIKGVHVSRYLCMGADGKMQLLQYSEE 94  
 L + V QS + L+K+V + IKG Y+CM +G + Y +  
 Sbjct 125062 MLEVNGTAVSGGTDKQSQTAKLTLKSVRAGQIVIKGSIG-GYVCMRNGAVSAKTYYVQS 125238

Query 95 DCAFEFEEIIRPDGYNVYRSEKHRLP 118  
 DC F E + P+ YN Y + +H P  
 Sbjct 125239 DCVFNETLLPNNYNSYSAAEHLNP 125310

Score = 38.5 bits (88), Expect = 0.014, Method: Compositional matrix adjust.  
 Identities = 21/57 (37%), Positives = 27/57 (47%), Gaps = 2/57 (4%)  
 Frame = +2

Query 65 TVAIKGVHVSRYLCMGADGKMQLLQYSEEDCAFEFEEI--RPDGYNVYRSEKHRLPV 119  
 TV IK Y+CM + G + G L DC F E I + GY Y S+ H+ P  
 Sbjct 125645 TVTIKSASDNYYVCMYSGGTVYGRGLGSLAADCEFTTEHIDQKKHGYKYSYSSKHHKAPT 125815

Lambda K H a alpha  
 0.321 0.138 0.419 0.792 4.96

Gapped  
 Lambda K H a alpha sigma  
 0.267 0.0410 0.140 1.90 42.6 43.6

Effective search space used: 7187202960

**6. Fibronectin type III domain-containing protein 5[32-212]**

Query= sp|Q8NAU1|32-212

Length=181

| Sequences producing significant alignments:                        | Score<br>(Bits) | E<br>Value   |
|--------------------------------------------------------------------|-----------------|--------------|
| <b>NC_004166.2 Bacteriophage SPPI complete nucleotide sequence</b> | <b>38.9</b>     | <b>0.009</b> |

>NC\_004166.2 Bacteriophage SPPI complete nucleotide sequence  
 Length=44010

Score = 38.9 bits (89), Expect = 0.009, Method: Compositional matrix adjust.  
 Identities = 29/95 (31%), Positives = 44/95 (46%), Gaps = 9/95 (9%)  
 Frame = +3

Query 3 PSAPVNVTVRHLKANSVVSVDVLEDEVVIGFAISQQKKDVRMLRFIQEVNTTTRSCALW 62  
 P+AP N+T +S V WD +E +KK + N TT S L  
 Sbjct 11010 PNAPQNLTYT-ATTDSTVTKWDAVEGADSYNVYRGAEEK-----LDANVTTTSHTLT 11162

Query 63 DLEEDTEYIVHVQAISIQQQSPASEPVLFKTPREA 97  
 ++ DT+ V+V A++ G+SP S+ V P E+  
 Sbjct 11163 GIQPDTQLTVNVAAVNAGGESPMISQIVTKTLPAES 11267

Lambda K H a alpha  
 0.314 0.129 0.364 0.792 4.96

Gapped  
 Lambda K H a alpha sigma

0.267 0.0410 0.140 1.90 42.6 43.6

Effective search space used: 6332282712

**7. Fibronectin type III domain-containing protein 5 (Irisin)|32-143**

Query= sp|Q8NAU1|32-143

Length=112

|                                                    |                                                        | Score       | E            |
|----------------------------------------------------|--------------------------------------------------------|-------------|--------------|
| <b>Sequences producing significant alignments:</b> |                                                        | (Bits)      | Value        |
| <b>NC_004166.2</b>                                 | <b>Bacteriophage SPP1 complete nucleotide sequence</b> | <b>38.9</b> | <b>0.002</b> |

>NC\_004166.2 Bacteriophage SPP1 complete nucleotide sequence  
Length=44010

Score = 38.9 bits (89), Expect = 0.002, Method: Compositional matrix adjust.  
Identities = 29/95 (31%), Positives = 44/95 (46%), Gaps = 9/95 (9%)  
Frame = +3

```

Query   3      PSAPVNVTVRHLKANSVVSWDVLEDEVVIGFAISQQKDVRLRFIQEVNTTTRSCALW 62
          P+AP N+T      +S  V WD +E              +KK              + N TT S  L
Sbjct  11010  PNAPQNLTYT-ATTDSVTVKWDAVEGADSYNVYRGAEEK-----LDANVTTTSHTLT 11162

```

```

Query   63      DLEEDTEYIVHVQAIISIQQSPASEPVLFKTPREA 97
          ++ DT+  V+V A++  G+SP S+ V      P E+
Sbjct  11163  GIQPDTQLTVNVAAVNAGGESPMISQIVTKTLPAES 11267

```

|        |       |       |       |       |
|--------|-------|-------|-------|-------|
| Lambda | K     | H     | a     | alpha |
| 0.312  | 0.126 | 0.349 | 0.792 | 4.96  |

Gapped

|        |        |       |      |       |       |
|--------|--------|-------|------|-------|-------|
| Lambda | K      | H     | a    | alpha | sigma |
| 0.267  | 0.0410 | 0.140 | 1.90 | 42.6  | 43.6  |

Effective search space used: 2144008700

**8. Transforming growth factor beta-2|303-414**

Query= sp|P61812|303-414

Length=112

|                                                    |                                                                | Score       | E            |
|----------------------------------------------------|----------------------------------------------------------------|-------------|--------------|
| <b>Sequences producing significant alignments:</b> |                                                                | (Bits)      | Value        |
| <b>NC_006966.1</b>                                 | <b>Deerpox virus W-848-83, complete genome</b>                 | <b>76.3</b> | <b>2e-16</b> |
| <b>NC_024447.1</b>                                 | <b>Pigeonpox virus isolate FeP2, complete genome</b>           | <b>67.0</b> | <b>2e-13</b> |
| <b>NC_024446.1</b>                                 | <b>Penguinpox virus isolate PSan92, complete genome</b>        | <b>66.2</b> | <b>4e-13</b> |
| <b>NC_002188.1</b>                                 | <b>Fowlpox virus, complete genome</b>                          | <b>62.8</b> | <b>7e-12</b> |
| <b>NC_005309.1</b>                                 | <b>Canarypox virus, complete genome</b>                        | <b>61.2</b> | <b>2e-11</b> |
| <b>NC_028238.1</b>                                 | <b>Turkeypox virus strain TKPV-HU1124/2011, complete ge...</b> | <b>46.6</b> | <b>4e-06</b> |



>NC\_006966.1 Deerpox virus W-848-83, complete genome  
Length=166259

Score = 76.3 bits (186), Expect = 2e-16, Method: Compositional matrix adjust.  
Identities = 38/97 (39%), Positives = 52/97 (54%), Gaps = 10/97 (10%)  
Frame = +3

```
Query 15 CCLRPLYIDFKRDLGWKWIHEPKGYANFCAGACPYLWSSDTQHSRVLSLYNTINPEASA 74
          CCL YIDFK+D+GW WI++P+GY+AN C G C H + YN
Sbjct 155217 CCLVDFYIDFKKDMGWNWIYKPEGYHANLCIGNC-----NHKLINMPYNY--AFKHN 155366

Query 75 SPCCVSQDLEPLTILYYIGKTPKIEQLSNMIVKSKC 111
          CC + ++ L I YY G+ K++ L NM + SC C
Sbjct 155367 VFCCAPKKMKSLIIAYYEGRKYKVDNLKMKIVSCGC 155477
```

>NC\_024447.1 Pigeonpox virus isolate FeP2, complete genome  
Length=282356

Score = 67.0 bits (162), Expect = 2e-13, Method: Compositional matrix adjust.  
Identities = 39/105 (37%), Positives = 57/105 (54%), Gaps = 5/105 (5%)  
Frame = -3

```
Query 9 RNVQD--NCCLRPLYIDFKRDLGWKWIHEPKGYANFCAGACPYLWSSDTQHSRVLSLYN 66
         R+VQD +C + YI+F RD+G KWI P G + +C G C +D+ +L+ +
Sbjct 87558 RSVQDSNDCRIYRKYINF-RDIGLKWILHPPGIDYGYCVGECTSFAYTDSFLYSLAFHY 87382

Query 67 TINPEASASPCCVSODLEPLTILYYIGKTPKIEQLSNMIVKSKC 111
          E CC QD++ L + Y +G+TPK L + VKSKC
Sbjct 87381 IDGIELKQ--CCSIQDMDDLIVHYRVGRTPKTSVLYKVSVKSKC 87253
```

>NC\_024446.1 Penguinpox virus isolate PSan92, complete genome  
Length=306862

Score = 66.2 bits (160), Expect = 4e-13, Method: Compositional matrix adjust.  
Identities = 38/105 (36%), Positives = 57/105 (54%), Gaps = 5/105 (5%)  
Frame = -2

```
Query 9 RNVQDN--CCLRPLYIDFKRDLGWKWIHEPKGYANFCAGACPYLWSSDTQHSRVLSLYN 66
         R++QD+ C + YI+F RD+G KWI P G + +C G C +D+ +L+ +
Sbjct 88674 RSIQDSNYCKIYRKYINF-RDIGLKWILHPPGIDYGYCVGECTSFAYTDSFLYSLAFHY 88498

Query 67 TINPEASASPCCVSODLEPLTILYYIGKTPKIEQLSNMIVKSKC 111
          E CC QD++ L + Y +G+TPK L + VKSKC
Sbjct 88497 IDGIELKQ--CCSIQDMDDLIVHYRVGRTPKTSVLYKVSVKSKC 88369
```

Score = 45.8 bits (107), Expect = 7e-06, Method: Composition-based stats.  
Identities = 25/84 (30%), Positives = 38/84 (45%), Gaps = 1/84 (1%)  
Frame = +1

```
Query 28 LGWKWIHEPKGYANFCAGACPYLWSSDTQHSRVLSLYNTINPEASASPCCVSODLEPLT 87
         LG+KWIHEP+G +C G C + S D ++ + CC + E +T
Sbjct 166063 LGYKWIHEPRGIQFTYCYGTC-VMGSYDESSVIYGTVVNTNYISDKGIPSCCSPKRREDIT 166239

Query 88 ILYYIGKTPKIEQLSNMIVKSKC 111
         I YY G+ + + N + C C
```

Sbjct 166240 ISYYRGRNIEKHTIHNFMPTHCGC 166311

>NC\_002188.1 Fowlpox virus, complete genome  
Length=288539

Score = 62.8 bits (151), Expect = 7e-12, Method: Compositional matrix adjust.  
Identities = 36/109 (33%), Positives = 55/109 (50%), Gaps = 3/109 (3%)  
Frame = -2

Query 3 DAAYCFRNVQDNCCLRPLYIDFKRDLGWKWIHEPKGYNANFCAGACPYLWSSDTQHRSVL 62  
D+ + + DNC + YI+F R +G KWI P G + +C G C +D+ +L  
Sbjct 80251 DSGVDYSSPSDNCNKVYRKYINF-RSIGLKWILHPPGIDYGYCMGECQSFVYTDSEFLYSL 80075

Query 63 SLYNTINPEASASPCCVSQDLEPLTILYYIGKTPKIEQLSNMIVKSKC 111  
+ + E CC Q ++ L + Y +G+TPK L + VKSKC  
Sbjct 80074 AFHYIDGIELKQ--CCSIQSMDDL VVHYRLGRTPKTAILRKVSVKSKC 79934

>NC\_005309.1 Canarypox virus, complete genome  
Length=359853

Score = 61.2 bits (147), Expect = 2e-11, Method: Compositional matrix adjust.  
Identities = 36/101 (36%), Positives = 52/101 (51%), Gaps = 4/101 (4%)  
Frame = +1

Query 12 QDNCCLRPLYIDFKRDLGWKWIHEPKGYNANFCAGACPYLWSSDTQHRSVLSLYNTINPE 71  
Q C L +Y+DF LG+KWIHEPKG +C G C + SS + S + T  
Sbjct 199447 QHVCSLNSVYLDFA-LGYKWIHEPKGIQFTYCHGTC--ILSSYDKSSVIYGTIVTNYLS 199617

Query 72 ASASP-CCVSQDLEPLTILYYIGKTPKIEQLSNMIVKSKC 111  
+ P CC ++ + +TI YY+G+ K + + N I C C  
Sbjct 199618 NNRIPLCCSPKERKDITITYYLG RNVKQTIRNFIPTHCGC 199740

Score = 51.2 bits (121), Expect = 1e-07, Method: Compositional matrix adjust.  
Identities = 30/97 (31%), Positives = 48/97 (49%), Gaps = 3/97 (3%)  
Frame = -3

Query 15 CCLRPLYIDFKRDLGWKWIHEPKGYNANFCAGACPYLWSSDTQHRSVLSLYNTINPEASA 74  
C LR ++ FK DLG WI PK + +C G C + SS T+ S + + + +  
Sbjct 194440 CLLRHKHMKFK-DLGCNWILRPKSFIFTYCKGTC--IISFTRSSIIYGS MFINDIKNI 194270

Query 75 SPCCVSQDLEPLTILYYIGKTPKIEQLSNMIVKSKC 111  
CC +TI+Y +GK K+ ++ + + SC C  
Sbjct 194269 HICCAPVTRS NITIMYMLGKNVKVSEIKDFLPSSCGC 194159

Score = 43.9 bits (102), Expect = 3e-05, Method: Compositional matrix adjust.  
Identities = 32/101 (32%), Positives = 48/101 (48%), Gaps = 6/101 (6%)  
Frame = -2

Query 13 DNCCLRPLYIDFKRDLGWKWIHEPKGYNANFCAGACPYLWSSDTQHRSVLS--LYNTINP 70  
D C LR YI F+ D+G W+ PKG ++C G C + SS + S + L N+I+  
Sbjct 198464 DICSLRYQYITFE-DMGCNWVLS PKGIMFSYCTGTC--VVSFFDKSSVIY GKMLLSIH- 198297

Query 71 EASASPCCVSQDLEPLTILYYIGKTPKIEQLSNMIVKSKC 111  
+ CC + + I Y GK K ++ N + C C

Sbjct 198296 KTKLHVCCCKPIRRQSVKITYMHGKNIKQSEIKNFMPSECGC 198174

Score = 42.0 bits (97), Expect = 2e-04, Method: Compositional matrix adjust.  
Identities = 29/108 (27%), Positives = 46/108 (43%), Gaps = 10/108 (9%)  
Frame = +3

Query 8 FRNVQDNCCLRPLYIDFKRDLGWKWIHEPKGYNANFCAGACPYLWSSDTQHSRVLSLYNT 67  
F ++ C +R + I F D G KWI P +C G C S + + + +Y T  
Sbjct 195411 FLDIDAICNIRSINIKFA-DYGMKWILSPLSTVLTICYGIC-----SISSYQKTSMLYGT 195572

Query 68 I----NPEASASPCCVSQDLEPLTILYYIGKTPKIEQLSNMIVKSKC 111  
I P+ + CC TI Y +G+ K + ++N + C C  
Sbjct 195573 IITNHMPDNTIPQCCYPITRSNFTIRYKVGRIKTDVINNFMPLECAC 195716

>NC\_028238.1 Turkeypox virus strain TKPV-HU1124/2011, complete genome  
Length=188534

Score = 46.6 bits (109), Expect = 4e-06, Method: Compositional matrix adjust.  
Identities = 30/98 (31%), Positives = 46/98 (47%), Gaps = 4/98 (4%)  
Frame = +2

Query 15 CCLRPLYIDFKRDLGWKWIHEPKGYNANFCAGACPYLWSSDTQHSRVLSLYNTINPEAS- 73  
C L YI FK D+G W+ PKG+ +C G C + SS T+ S V + ++S  
Sbjct 64331 CALHYKYISFK-DVGCNWWLSPKGFTRYCKGEC--IVSSFTKSSIVYGAMLVNDAKSSN 64501

Query 74 ASPCCVSQDLEPLTILYYIGKTPKIEQLSNMIVKSKC 111  
CC + + I+Y +G + + N + SC C  
Sbjct 64502 IHICCSPKSRTSMRIMYAVGSNIRESTIHNFMPPSSCGC 64615

Score = 43.1 bits (100), Expect = 6e-05, Method: Compositional matrix adjust.  
Identities = 28/97 (29%), Positives = 42/97 (43%), Gaps = 2/97 (2%)  
Frame = -3

Query 15 CCLRPLYIDFKRDLGWKWIHEPKGYNANFCAGACPYLWSSDTQHSRVLSLYNTINPEASA 74  
C L IDF LG KWI PK + +C+G C + S D +L N+ +  
Sbjct 63210 CKLHHKRIDFS-SLGMKWITYPKSIDITYCSGICV-VGSYDKTSVIYGTLVNSYMASHNI 63037

Query 75 SPCCVSQDLEPLTILYYIGKTPKIEQLSNMIVKSKC 111  
CC + LT+ Y G+ + + N + +C C  
Sbjct 63036 PQCCFPKTRSHLTVTYMSGRKQMNQTIKNFMPATCSC 62926

| Lambda | K     | H     | a     | alpha |
|--------|-------|-------|-------|-------|
| 0.323  | 0.136 | 0.465 | 0.792 | 4.96  |

| Gapped | Lambda | K      | H     | a    | alpha | sigma |
|--------|--------|--------|-------|------|-------|-------|
|        | 0.267  | 0.0410 | 0.140 | 1.90 | 42.6  | 43.6  |

Effective search space used: 2144008700

## **9. Transforming growth factor beta-1|279-390**

Query= sp|P01137|279-390

Length=112

| Sequences producing significant alignments: |                                                         | Score<br>(Bits) | E<br>Value |
|---------------------------------------------|---------------------------------------------------------|-----------------|------------|
| NC_006966.1                                 | Deerpox virus W-848-83, complete genome                 | 90.5            | 2e-21      |
| NC_002188.1                                 | Fowlpox virus, complete genome                          | 67.4            | 2e-13      |
| NC_024447.1                                 | Pigeonpox virus isolate FeP2, complete genome           | 63.9            | 3e-12      |
| NC_024446.1                                 | Penguinpox virus isolate PSan92, complete genome        | 63.2            | 5e-12      |
| NC_005309.1                                 | Canarypox virus, complete genome                        | 60.5            | 5e-11      |
| NC_028238.1                                 | Turkeypox virus strain TKPV-HU1124/2011, complete ge... | 49.7            | 3e-07      |

>NC\_006966.1 Deerpox virus W-848-83, complete genome  
Length=166259

Score = 90.5 bits (223), Expect = 2e-21, Method: Composition-based stats.  
Identities = 42/97 (43%), Positives = 59/97 (61%), Gaps = 10/97 (10%)  
Frame = +3

```
Query 15      CCVRQLYIDFRKDLGWKWIHEPKGYHANFCLGPCPYIWSLDTQYSKVLALYNQHNP  
              CC+   YIDF+KD+GW WI++P+GYHAN C+G C +  ++ Y+      +HN  
Sbjct 155217  CCLVDFYIDFKKDMGWNWIYKPEGYHANLCIGNCNHKL-INMPYNYAF-----KHN----- 155366  
  
Query 75      APCCVPQALEPLPIVYYVGRKPKVEQLSNMIVRSCKC 111  
              CC P+ ++ L I YY GRK KV+ L NM + SC C  
Sbjct 155367  VFCCAPKMKSLIIAYYEGRKYKVDNLKMKIVSCGC 155477
```

>NC\_002188.1 Fowlpox virus, complete genome  
Length=288539

Score = 67.4 bits (163), Expect = 2e-13, Method: Compositional matrix adjust.  
Identities = 38/109 (35%), Positives = 56/109 (51%), Gaps = 3/109 (3%)  
Frame = -2

```
Query 3       DTNYCFSSTEKNCCVRQLYIDFRKDLGWKWIHEPKGYHANFCLGPCPYIWSLDTQYSKVL 62  
              D+   +SS  NC V + YI+FR +G KWI  P G   +C+G C      D+   +L  
Sbjct 80251  DSGVDYSSPSDNCKVYRKYINFRS-IGLKWILHPPGIDYGYCMGECQSFVYTDSFLYSL 80075  
  
Query 63      ALYNQHNPASAAAPCCVPQALEPLPIVYYVGRKPKVEQLSNMIVRSCKC 111  
              A + + G      CC Q+++ L + Y +GR PK   L + V+SCKC  
Sbjct 80074  AFH--YIDGIELKQCCSIQSMDDL VVHYRLGRTPKTAILRKVSVKSKC 79934
```

>NC\_024447.1 Pigeonpox virus isolate FeP2, complete genome  
Length=282356

Score = 63.9 bits (154), Expect = 3e-12, Method: Compositional matrix adjust.  
Identities = 35/98 (36%), Positives = 51/98 (52%), Gaps = 3/98 (3%)  
Frame = -3

```
Query 14      NCCVRQLYIDFRKDLGWKWIHEPKGYHANFCLGPCPYIWSLDTQYSKVLALYNQHNP  
              +C + + YI+FR D+G KWI  P G   +C+G C      D+   +LA + + G  
Sbjct 87537  DCRIYRKYINFR-DIGLKWILHPPGIDYGYCVGECTSFAYTDSFLYSLLAFFH--YIDGIE 87367  
  
Query 74      AAPCCVPQALEPLPIVYYVGRKPKVEQLSNMIVRSCKC 111  
              CC  Q ++ L + Y VGR PK   L + V+SCKC
```

Sbjct 87366 LKQCCSIQDMDLLIVHYRVGRTPKTSVLYKVSVKSKC 87253

>NC\_024446.1 Penguinpox virus isolate PSan92, complete genome  
Length=306862

Score = 63.2 bits (152), Expect = 5e-12, Method: Compositional matrix adjust.  
Identities = 35/97 (36%), Positives = 50/97 (52%), Gaps = 3/97 (3%)  
Frame = -2

Query 15 CCVRQLYIDFRKDLGWKWIHEPKGYHANFCLGPCPYIWSLDTQYSKVLALYNQHNP GASA 74  
C + + YI+FR D+G KWI P G +C+G C D+ +LA + + G  
Sbjct 88650 CKIYRKYINFR-DIGLKWILHPPGIDYGYCVGECTSFAYTDSFLYSLLA FH--YIDGIEL 88480

Query 75 APCCVPQALEPLPIVYVGRKPKVEQLSNMIVRSCKC 111  
CC Q ++ L + Y VGR PK L + V+SCKC  
Sbjct 88479 KQCCSIQDMDLLIVHYRVGRTPKTSVLYKVSVKSKC 88369

Score = 47.0 bits (110), Expect = 2e-06, Method: Composition-based stats.  
Identities = 26/84 (31%), Positives = 37/84 (44%), Gaps = 1/84 (1%)  
Frame = +1

Query 28 LGWKWIHEPKGYHANFCLGPCPYIWSLDTQYSKVLALYNQHNP GASAAPCCVPQALEPLP 87  
LG+KWIHEP+G +C G C + S D + + CC P+ E +  
Sbjct 166063 LGYKWIHEPRGIQFTYCYGTC-VMGSYDESSVIYGT VVTNYISDKGIPSCCSPKRREDIT 166239

Query 88 IVYVGRKPKVEQLSNMIVRSCKC 111  
I YY GR + + N + C C  
Sbjct 166240 ISYYRGRNIEKHTIHNFMPTHCGC 166311

>NC\_005309.1 Canarypox virus, complete genome  
Length=359853

Score = 60.5 bits (145), Expect = 5e-11, Method: Compositional matrix adjust.  
Identities = 35/100 (35%), Positives = 50/100 (50%), Gaps = 8/100 (8%)  
Frame = +1

Query 15 CCVRQLYIDFRKDLGWKWIHEPKGYHANFCLGPCPYIWSLDTQ---YSKVLALYNQHNP G 71  
C + +Y+DF LG+KWIHEPKG +C G C + S D Y ++ Y +N  
Sbjct 199456 CSLNSVYLD FSA-LGYKWIHEPKGIQFTYCHGT CI-LSSYDKSSVIYGTIVTNYLSNN-- 199623

Query 72 ASAAPCCVPQALEPLPIVYVGRKPKVEQLSNMIVRSCKC 111  
CC P+ + + I YY+GR K + + N I C C  
Sbjct 199624 -RIPLCCSPKERKDITITYYLGRNVKKQTIRNFIP THCGC 199740

Score = 47.4 bits (111), Expect = 2e-06, Method: Composition-based stats.  
Identities = 29/97 (30%), Positives = 47/97 (48%), Gaps = 3/97 (3%)  
Frame = -3

Query 15 CCVRQLYIDFRKDLGWKWIHEPKGYHANFCLGPCPYIWSLDTQYSKVLALYNQHNP GASA 74  
C +R ++ F KDLG WI PK + +C G C I S T+ S + ++ +  
Sbjct 194440 CLLRHKHKMF-KDLGCNWILRPKSFIFTYCKGTC--IISFTRSSIIYGS MFINDIKNI 194270

Query 75 APCCVPQALEPLPIVYVGRKPKVEQLSNMIVRSCKC 111  
CC P + I+Y +G+ KV ++ + + SC C

Sbjct 194269 HICCAPVTRSINITIMYMLGKNVKVSEIKDFLPSSCGC 194159

Score = 45.8 bits (107), Expect = 7e-06, Method: Composition-based stats.  
Identities = 31/108 (29%), Positives = 42/108 (39%), Gaps = 10/108 (9%)  
Frame = +3

Query 8 FSSTEKNCCVRLYIDFRKDLGKWIHEPKGYHANFCLGPCPYIWSLDTQYSKVLALY-- 65  
F + C +R + I F D G KWI P +C G C + Y K +Y  
Sbjct 195411 FLDIDAICNIRSINIKF-ADYGMKWILSPLSTVLTICYGICSI-----SSYQKTSLMYGT 195572  
Query 66 --NQHNPGASAAPCCVPQALEPLPIVYVGRKPKVEQLSNMIVRSCKC 111  
H P + CC P I Y VGR K + ++N + C C  
Sbjct 195573 IITNHMPDNTIPQCCYPITRSNFTIRYKVGRIKTDVINNFMPLECAC 195716

Score = 43.5 bits (101), Expect = 4e-05, Method: Compositional matrix adjust.  
Identities = 31/100 (31%), Positives = 46/100 (46%), Gaps = 8/100 (8%)  
Frame = -2

Query 15 CCVRLYIDFRKDLGKWIHEPKGYHANFCLGPCPYIWSLDTQ---YSKVLALYNQHNPG 71  
C +R YI F +D+G W+ PKG ++C G C + S D Y K+L L + H  
Sbjct 198458 CSLRYQYITF-EDMGCNWLSPKGIMFSYCTGTCTCV-VSSFDKSSVIYGMKL-LNSIHKTK 198288  
Query 72 ASAAPCCVPQALEPLPIVYVGRKPKVEQLSNMIVRSCKC 111  
CC P + + I Y G+ K ++ N + C C  
Sbjct 198287 LHV--CCKPIRRQSVKITYMHGKNIKQSEIKNFMPSECGC 198174

>NC\_028238.1 Turkeypox virus strain TKPV-HU1124/2011, complete genome  
Length=188534

Score = 49.7 bits (117), Expect = 3e-07, Method: Compositional matrix adjust.  
Identities = 32/100 (32%), Positives = 48/100 (48%), Gaps = 4/100 (4%)  
Frame = +2

Query 13 KNCCVRLYIDFRKDLGKWIHEPKGYHANFCLGPCPYIWSLDTQYSKVL-ALYNQHNPG 71  
K C + YI F KD+G W+ PKG+ +C G C I S T+ S V A+  
Sbjct 64325 KECALHYKYISF-KDVGCNWVLSPKGFTFRYCKGEC--IVSSFTKSSIVYGAMLVNDAKS 64495  
Query 72 ASAAPCCVPQALEPLPIVYVGRKPKVEQLSNMIVRSCKC 111  
++ CC P++ + I+Y VG + + N + SC C  
Sbjct 64496 SNIHICCSPKSRTSMRIMYAVGSNIRESTIHNFMPSSECGC 64615

Score = 46.6 bits (109), Expect = 3e-06, Method: Composition-based stats.  
Identities = 29/97 (30%), Positives = 40/97 (41%), Gaps = 2/97 (2%)  
Frame = -3

Query 15 CCVRLYIDFRKDLGKWIHEPKGYHANFCLGPCPYIWSLDTQYSKVLALYNQHNPGASA 74  
C + IDF LG KWI PK +C G C + S D L N + +  
Sbjct 63210 CKLHHKRIDF-SSLGMKWITYPKSIDITYCSGIC-VVGSYDKTSVIYGTLVNSYMASHNI 63037  
Query 75 APCCVPQALEPLPIVYVGRKPKVEQLSNMIVRSCKC 111  
CC P+ L + Y GRK + + N + +C C  
Sbjct 63036 PQCCFPKTRSHLTVTYMSGRKQMNQTIKNFMPATCSC 62926

Lambda K H a alpha  
 0.323 0.138 0.482 0.792 4.96

Gapped

Lambda K H a alpha sigma  
 0.267 0.0410 0.140 1.90 42.6 43.6

Effective search space used: 2144008700

**10. Tumor necrosis factor|57-233**

Query= sp|P01375|57-233

Length=177

| <b>Sequences producing significant alignments:</b> |                                                         | <b>Score</b>  | <b>E</b>     |
|----------------------------------------------------|---------------------------------------------------------|---------------|--------------|
|                                                    |                                                         | <b>(Bits)</b> | <b>Value</b> |
| <b>NC_030656.1</b>                                 | <b>Pteropox virus strain Australia, complete genome</b> | <b>52.4</b>   | <b>2e-07</b> |

>NC\_030656.1 Pteropox virus strain Australia, complete genome  
 Length=133492

Score = 52.4 bits (124), Expect = 2e-07, Method: Compositional matrix adjust.  
 Identities = 38/151 (25%), Positives = 63/151 (42%), Gaps = 24/151 (16%)  
 Frame = +1

```

Query 30      DKPVAHVVANPQAEGQL-----QWLNRRANALLANGVELRDNQLVVPSEGLY 76
              + VAHV N +L W N N +L+N + D +++V GLY
Sbjct 34069   NTSVAHVVTGNNWNERNLYPNNSYFLGNKITSWSNTSNNVLSNSYYI-DGEIIVTVSGLY 34245

Query 77      LIYSQVLFK-----GQGCPSTHVLLTHTISRIAVSYQTKVNLLSAIKSPCQRETPEGAEA 131
              IY+Q FK S ++ + I + SY + L+ + +S C +T E
Sbjct 34246   YIYAQTYFKLIFGYNSKGNKNIQMVOYIYKNTSSYGDPLMLMKSARSNCWDKTAEYGLY 34425

Query 132     KPWYEPIYLGGVFQLEKGDRLSAEINRPDYL 162
              +Y GG+ L+KGD + + ++L
Sbjct 34426   -----SVYQGGIHYLKKGDSVFVTVTNKNFL 34503
  
```

Lambda K H a alpha  
 0.317 0.134 0.394 0.792 4.96

Gapped

Lambda K H a alpha sigma  
 0.267 0.0410 0.140 1.90 42.6 43.6

Effective search space used: 5989997160

**11. Insulin-like growth factor I|49-118**

Query= sp|P05019|49-118

Length=70

| <b>Sequences producing significant alignments:</b> |  | <b>Score</b>  | <b>E</b>     |
|----------------------------------------------------|--|---------------|--------------|
|                                                    |  | <b>(Bits)</b> | <b>Value</b> |

|             |                                                         |      |       |
|-------------|---------------------------------------------------------|------|-------|
| NC_033423.1 | Lymphocystis disease virus Sa isolate SA9, complete ... | 49.3 | 7e-08 |
| NC_006549.1 | Singapore grouper iridovirus, complete genome           | 45.8 | 1e-06 |
| NC_001824.1 | Lymphocystis disease virus 1, complete genome           | 36.6 | 0.003 |

>NC\_033423.1 Lymphocystis disease virus Sa isolate SA9, complete genome  
Length=208501

Score = 49.3 bits (116), Expect = 7e-08, Method: Compositional matrix adjust.  
Identities = 27/62 (44%), Positives = 39/62 (63%), Gaps = 7/62 (11%)  
Frame = +2

```
Query 3      ETLCGAELVDALQFVCGDRGFYFNKPTGYGSSSRAPQTG--IVDECC-FRSCDLRRLEM 59
            +TLCG+ELVDAL+ VCG+ G + P      ++ + PQ+G  IVD CC + C+  L+
Sbjct 203636 QTLCGSELVDALELVCGEYGGIYRPP----KNANKKPQSGKKIVDVCCTTKGCNYMDLKQ 203803
```

```
Query 60      YC 61
            YC
Sbjct 203804 YC 203809
```

>NC\_006549.1 Singapore grouper iridovirus, complete genome  
Length=140131

Score = 45.8 bits (107), Expect = 1e-06, Method: Composition-based stats.  
Identities = 26/61 (43%), Positives = 31/61 (51%), Gaps = 5/61 (8%)  
Frame = +3

```
Query 5      LCGAELVDALQFVCGDRGFYFNKPTGYGSSSRAPQTGIVDECCFRSCDLRRLEMYCAPL 64
            +CG EL+DAL  CGDRG Y      G + S      G+ D CC  CD  L+ YC P
Sbjct 58659  VCGGELIDALTEHCGDRGVYTPRRRGRTRRS-----VGLADACCKNECDENELDRYCNPK 58823
```

```
Query 65      K 65
            K
Sbjct 58824  K 58826
```

>NC\_001824.1 Lymphocystis disease virus 1, complete genome  
Length=102653

Score = 36.6 bits (83), Expect = 0.003, Method: Compositional matrix adjust.  
Identities = 22/41 (54%), Positives = 24/41 (59%), Gaps = 2/41 (5%)  
Frame = +1

```
Query 3      ETLCGAELVDALQFVCGDRGFYFNKPTGYGSSSRAPQTGI 43
            E LC A LV ALQ VCG+RG Y  PT  S+ R  TGI
Sbjct 57106  EILCSAHLVAALQRVCGNRGVYRPPPTRRRST--RNGTTGI 57222
```

|        |       |       |       |       |
|--------|-------|-------|-------|-------|
| Lambda | K     | H     | a     | alpha |
| 0.324  | 0.141 | 0.462 | 0.792 | 4.96  |

Gapped

|        |        |       |      |       |       |
|--------|--------|-------|------|-------|-------|
| Lambda | K      | H     | a    | alpha | sigma |
| 0.267  | 0.0410 | 0.140 | 1.90 | 42.6  | 43.6  |



Effective search space used: 2153929100

## **12. Insulin-like growth factor II|25-91**

Query= sp|P01344|25-91

Length=67

|                                                    |                                                                | Score         | E            |
|----------------------------------------------------|----------------------------------------------------------------|---------------|--------------|
| <b>Sequences producing significant alignments:</b> |                                                                | <b>(Bits)</b> | <b>Value</b> |
| <b>NC_006549.1</b>                                 | <b>Singapore grouper iridovirus, complete genome</b>           | <b>43.9</b>   | <b>7e-06</b> |
| <b>NC_033423.1</b>                                 | <b>Lymphocystis disease virus Sa isolate SA9, complete ...</b> | <b>37.7</b>   | <b>0.001</b> |

>NC\_006549.1 Singapore grouper iridovirus, complete genome  
Length=140131

Score = 43.9 bits (102), Expect = 7e-06, Method: Composition-based stats.  
Identities = 27/59 (46%), Positives = 33/59 (56%), Gaps = 2/59 (3%)  
Frame = +3

```

Query   8      LCGGELVDTLQFVCGDRGFYFsrpasrvsrrsrGIVEECCFRSCDLALLETYCATPAKS 66
          +CGGEL+D L   CGDRG Y + P          RS G+ + CC   CD   L+ YC   P KS
Sbjct  58659  VCGGELIDALTEHCGDRGVY-TPPRRGRRTSVGLADACCKNECDENELDRYC-NPKKS 58829

```

>NC\_033423.1 Lymphocystis disease virus Sa isolate SA9, complete genome  
Length=208501

Score = 37.7 bits (86), Expect = 0.001, Method: Compositional matrix adjust.  
Identities = 23/60 (38%), Positives = 34/60 (57%), Gaps = 3/60 (5%)  
Frame = +2

```

Query   6      ETLCGGELVDTLQFVCGDRGFYFsrpasrvsrrsrG--IVEECC-FRSCDLALLETYCAT 62
          +TLCG ELVD L+ VCG+ G + P + +   G IV+ CC + C+   L+ YC +
Sbjct  203636  QTLCGSELVDALELVCGEYGGIYRPPKNANKKPQSGKKIVDVCCTTKGCNYMDLKQYCNS 203815

```

|        |       |       |       |       |
|--------|-------|-------|-------|-------|
| Lambda | K     | H     | a     | alpha |
| 0.326  | 0.143 | 0.475 | 0.792 | 4.96  |

Gapped

|        |        |       |      |       |       |
|--------|--------|-------|------|-------|-------|
| Lambda | K      | H     | a    | alpha | sigma |
| 0.267  | 0.0410 | 0.140 | 1.90 | 42.6  | 43.6  |

Effective search space used: 2154637700

## **13. Inhibin beta A chain|311-426**

Query= sp|P08476|311-426

Length=116

|                                                    |  | Score         | E            |
|----------------------------------------------------|--|---------------|--------------|
| <b>Sequences producing significant alignments:</b> |  | <b>(Bits)</b> | <b>Value</b> |

|             |                                                         |      |       |
|-------------|---------------------------------------------------------|------|-------|
| NC_006966.1 | Deerpox virus W-848-83, complete genome                 | 57.8 | 4e-10 |
| NC_028238.1 | Turkeypox virus strain TKPV-HU1124/2011, complete ge... | 56.2 | 2e-09 |
| NC_005309.1 | Canarypox virus, complete genome                        | 52.0 | 6e-08 |
| NC_024446.1 | Penguinpox virus isolate PSan92, complete genome        | 45.1 | 1e-05 |
| NC_024447.1 | Pigeonpox virus isolate FeP2, complete genome           | 35.4 | 0.030 |
| NC_002188.1 | Fowlpox virus, complete genome                          | 34.7 | 0.062 |

>NC\_006966.1 Deerpox virus W-848-83, complete genome  
Length=166259

Score = 57.8 bits (138), Expect = 4e-10, Method: Compositional matrix adjust.  
Identities = 34/106 (32%), Positives = 50/106 (47%), Gaps = 20/106 (19%)  
Frame = +3

```
Query 11      CCKKQFFVFSFK-DIGWNDWIIAPSGYHANYCEGECPSHIAGTSGSSLSFHSTVINHYRMR 69
              CC  F++ FK D+GWN WI  P GYHAN C G C  +                      M
Sbjct 155217  CCLVDFYIDFKKDMGWN-WIYKPEGYHANLCIGNCNHKLIN-----MP 155342
```

```
Query 70      GHSPFANLKSCCVPTKLRPMSMLYDDGQNIKKDIQNMIVEECGC 115
              + F +  CC P K++ + + YY +G+      +++NM +  CGC
Sbjct 155343  YNYAFKHNVFCCAPKMKSLIIAYY-EGRKYKVDNLKNMKIVSCGC 155477
```

>NC\_028238.1 Turkeypox virus strain TKPV-HU1124/2011, complete genome  
Length=188534

Score = 56.2 bits (134), Expect = 2e-09, Method: Compositional matrix adjust.  
Identities = 31/99 (31%), Positives = 54/99 (55%), Gaps = 10/99 (10%)  
Frame = +2

```
Query 17      FVSFKDIGWNDWIIAPSGYHANYCEGECPSHIAGTSGSSLSFHSTVINHYRMRGHSPFAN 76
              ++SFKD+G N W+++P G+  YC+GEC  ++ + SS+ + + ++N  +      +N
Sbjct 64349  YISFKDVGCN-WVLSPKGFTFRYCKGECI--VSSFTKSSIVYGAMLVNDAKS-----SN 64501
```

```
Query 77      LKSCCVPTKLRPMSMLYDDGQNIKKDIQNMIVEECGC 115
              + CC P      M ++ Y  G NI +  I N +  CGC
Sbjct 64502  IHICCSPKSRTSMRIM-YAVGSNIRESTIHNFMPPSSCGC 64615
```

Score = 41.6 bits (96), Expect = 3e-04, Method: Compositional matrix adjust.  
Identities = 30/114 (26%), Positives = 47/114 (41%), Gaps = 10/114 (9%)  
Frame = -3

```
Query 2      LECDGKVNICCKKQFFVFSFKDIGWNDWIIAPSGYHANYCEGECPSHIAGTSGSSLSFHST 61
              L+ D +  C      + F  +G  WI  P      YC G C  + G+  +  + T
Sbjct 63237  LKADDRNTTCKLHHKRIDFSSLGMK-WITYPKSIDITYCSGIC---VVGSYDKTSVIYGT 63070
```

```
Query 62      VINHYRMRGHSPFANLKSCCVPTKLRPMSMLYDDGQNIKKDIQNMIVEECGC 115
              ++N Y M  H      N+  CC P K R      + Y  G+  + + I+N +  C C
Sbjct 63069  LVNSY-MASH----NIPQCCFP-KTRSHLTVTYMSGRKQMNQTIKNFMPATCSC 62926
```

>NC\_005309.1 Canarypox virus, complete genome  
Length=359853

Score = 52.0 bits (123), Expect = 6e-08, Method: Compositional matrix adjust.

Identities = 30/107 (28%), Positives = 56/107 (52%), Gaps = 10/107 (9%)  
Frame = -2

Query 9 N1CCKKQFFV5FKDIGWNDWIIAPSGYHANYCEGECPSHIAGTSGSSLSFHSTVINHYRM 68  
+IC + +++F+D+G N W+++P G +YC G C ++ SS+ + ++N  
Sbjct 198464 DICSLRYQYITFEDMGCN-WVLSLPGKIMFSYCTGTVC--VSSFDKSSVIYGKMLLSIHK 198294

Query 69 RGHSPPANLKSCCVPTKLRPMSMLYDDGQNIKKDIQNMIVEECGC 115  
L CC P + + + + Y G+NI + +I+N + ECGC  
Sbjct 198293 -----TKLHVCCCKPIRRQSVKITYMH-GKNIKQSEIKNFMPSECGC 198174

Score = 51.6 bits (122), Expect = 6e-08, Method: Compositional matrix adjust.  
Identities = 30/107 (28%), Positives = 50/107 (47%), Gaps = 10/107 (9%)  
Frame = +1

Query 9 N1CCKKQFFV5FKDIGWNDWIIAPSGYHANYCEGECPSHIAGTSGSSLSFHSTVINHYRM 68  
++C ++ F +G+ WI P G YC G C I + S + T++ +Y  
Sbjct 199450 HVCSLNSVYLDLFSALGYK-WIHEPKGIQFTYCHGTC---ILSSYDKSSVIYGTIVTNYLS 199617

Query 69 RGHSPPANLKSCCVPTKLRPMSMLYDDGQNIKKDIQNMIVEECGC 115  
P CC P + + +++ YY G+N+ K+ I+N I CGC  
Sbjct 199618 NNRIPL-----CCSPKERKDITITYYL-GRNVKKQTIRNFIPTHCGC 199740

Score = 51.6 bits (122), Expect = 7e-08, Method: Compositional matrix adjust.  
Identities = 30/105 (29%), Positives = 49/105 (47%), Gaps = 2/105 (2%)  
Frame = -3

Query 11 CCKKQFFV5FKDIGWNDWIIAPSGYHANYCEGECPSHIAGTSGSSLSFHSTVINHYRMRG 70  
C KQ ++ K + +D IIAP G YC G C + S+ + + ++  
Sbjct 74056 CTTKQKYLDLKYLDMDDTIIAPRGITFKYCSGYCDINSMKNFYNSLYGILAMKFISLKA 73877

Query 71 HSPFANLKSCCVPTKLRPMSMLYDDGQNIKKDIQNMIVEECGC 115  
+ +N K CC P + +S+LY D NI K ++ N + +C C  
Sbjct 73876 IN--SNFKRCCYPESMENISILYIDPNGNIKKGELVNSTISKVC 73748

Score = 47.4 bits (111), Expect = 2e-06, Method: Compositional matrix adjust.  
Identities = 30/105 (29%), Positives = 52/105 (50%), Gaps = 11/105 (10%)  
Frame = -3

Query 11 CCKKQFFV5FKDIGWNDWIIAPSGYHANYCEGECPSHIAGTSGSSLSFHSTVINHYRMRG 70  
C + + FKD+G N WI+ P + YC+G C I+ + SS+ + S IN +  
Sbjct 194440 CLLRHKHKMFKFDLGCN-WILRPKSFIFTYCKGTCTI--ISSFTRSSIIYGSMFINDIK--- 194279

Query 71 HSPFANLKSCCVPTKLRPMSMLYDDGQNIKKDIQNMIVEECGC 115  
N+ CC P ++++Y G+N+ +I++ + CGC  
Sbjct 194278 ----KNIHICCAPVTRSNITIMYM-LGKNVKVSEIKDFLPSSCGC 194159

Score = 42.7 bits (99), Expect = 9e-05, Method: Compositional matrix adjust.  
Identities = 31/106 (29%), Positives = 44/106 (42%), Gaps = 10/106 (9%)  
Frame = +3

Query 10 ICCKKQFFV5FKDIGWNDWIIAPSGYHANYCEGECPSHIAGTSGSSLSFHSTVINHYRMR 69  
IC + + F D G WI++P YC G C I+ +SL + + + NH  
Sbjct 195429 ICNIRSINIKFADYGM-KWILSPLSTVLTICYGIC--SISSYQKTSMLYGTIITNHM--- 195590

Query 70 GHSPFANLKSCCVPTKLRPMSMLYYDDGQNIKKDIQNMIVEECGC 115  
P + CC P R + Y G+NI I N + EC C  
Sbjct 195591 ---PDNTIPQCCYPIT-RSNFTIRYKVGRIKTDVINNFMPLECAC 195716

>NC\_024446.1 Penguinpox virus isolate PSan92, complete genome  
Length=306862

Score = 45.1 bits (105), Expect = 1e-05, Method: Compositional matrix adjust.  
Identities = 30/97 (31%), Positives = 45/97 (46%), Gaps = 10/97 (10%)  
Frame = +1

Query 19 SFKDIGWNDWIIAPSGYHANYCEGECPSHIAGTSGSSLSFHSTVINHYRMRGHSPFANLK 78  
S+ +G+ WI P G YC G C + G+ S + TV+ +Y +  
Sbjct 166051 SYVHLGYK-WIHEPRGIQFTYCYGTC---VMGSYDESSVIYGTVVVTNYISD-----KGIP 166203

Query 79 SCCVPTKLRPMSMLYYDDGQNIKKDIQNMIVEECGC 115  
SCC P + +++ YY G+NI K I N + CGC  
Sbjct 166204 SCCSPKRREDITISYR-GRNIEKHTIHNFMPTHC GC 166311

Score = 36.2 bits (82), Expect = 0.019, Method: Compositional matrix adjust.  
Identities = 21/53 (40%), Positives = 28/53 (53%), Gaps = 3/53 (6%)  
Frame = -2

Query 9 NICCKKQFFVSVFKDIGWNDWIIAPSGYHANYCEGECPSHIAGTSG--SSLSFH 59  
N C + +++F+DIG WI+ P G YC GEC S S S L+FH  
Sbjct 88656 NYCKIYRKYINFRDIGLK-WILHPPGIDYGVCVGECTSFAYTDSFLYSLLA FH 88501

>NC\_024447.1 Pigeonpox virus isolate FeP2, complete genome  
Length=282356

Score = 35.4 bits (80), Expect = 0.030, Method: Compositional matrix adjust.  
Identities = 21/53 (40%), Positives = 28/53 (53%), Gaps = 3/53 (6%)  
Frame = -3

Query 9 NICCKKQFFVSVFKDIGWNDWIIAPSGYHANYCEGECPSHIAGTSG--SSLSFH 59  
N C + +++F+DIG WI+ P G YC GEC S S S L+FH  
Sbjct 87540 NDCRIYRKYINFRDIGLK-WILHPPGIDYGVCVGECTSFAYTDSFLYSLLA FH 87385

>NC\_002188.1 Fowlpox virus, complete genome  
Length=288539

Score = 34.7 bits (78), Expect = 0.062, Method: Compositional matrix adjust.  
Identities = 27/101 (27%), Positives = 45/101 (45%), Gaps = 15/101 (15%)  
Frame = -2

Query 17 FVSVFKDIGWNDWIIAPSGYHANYCEGECPSHIAGTSG--SSLSFHSTVINHYRMRGHSPF 74  
+++F+ IG WI+ P G YC GEC S + S S L+FH +  
Sbjct 80197 YINFRSIGLK-WILHPPGIDYGCMGECQSFVYTD SFLYSLLA FH-----YIDG 80054

Query 75 ANLKSCCVPTKLRPMSMLYYDDGQNIKKDIQNMIVEECGC 115  
LK CC + + +++Y G+ ++ + V+ C C  
Sbjct 80053 IELKQCCSIQSMDDL-VVHYRLGRTPKTAILRKVSVKSKC 79934

Lambda K H a alpha  
 0.323 0.138 0.467 0.792 4.96

Gapped  
 Lambda K H a alpha sigma  
 0.267 0.0410 0.140 1.90 42.6 43.6

Effective search space used: 2143063900

**14. Interleukin-6|30-212**

Query= sp|P05231|30-212

Length=183

| <b>Sequences producing significant alignments:</b> |                                             | <b>Score</b>  | <b>E</b>     |
|----------------------------------------------------|---------------------------------------------|---------------|--------------|
|                                                    |                                             | <b>(Bits)</b> | <b>Value</b> |
| <b>NC_009333.1</b>                                 | <b>Human herpesvirus 8, complete genome</b> | <b>74.7</b>   | <b>5e-15</b> |

>NC\_009333.1 Human herpesvirus 8, complete genome  
 Length=137969

Score = 74.7 bits (182), Expect = 5e-15, Method: Composition-based stats.  
 Identities = 41/158 (26%), Positives = 77/158 (49%), Gaps = 0/158 (0%)  
 Frame = -3

```

Query 26      KQIRYILDGISALRKETCNKSNMCESSKEALAENNLNLPKMAEKDGCQSGFNEETCLVK 85
              +++ ++L I ++ C ++ +C+ E A +L LP + + D C GFNE +CL K
Sbjct 17733   QRLNWMLWVIDECFRDLCYRTGICKGILEPAAIFHLKLPAINDTDHCGLIGFNETSCLKK 17554

Query 86      IITGLLEFEVYLEYLQNRFESSEEQARAVQMSTKVLIQFLQKKAKNLDAITTPDPTNAS 145
              + G EFEV ++L F S +++ TK L +Q++ L P +
Sbjct 17553   LADGFFEFVFLFKFLTTEFGKSVINVDVMEELLTKTLGWDIQEELNKLTKTHYSPPKFDRG 17374

Query 146     LLTKLQAQNQWLQDMTTHLILRSFKEFLQSSLRALRQM 183
              LL +LQ W++ + +L + ++F ++R L +
Sbjct 17373   LLGRLQGLKYWVRHFASFYVLSAMEKFAGQAVRVLNSI 17260
  
```

Lambda K H a alpha  
 0.315 0.128 0.355 0.792 4.96

Gapped  
 Lambda K H a alpha sigma  
 0.267 0.0410 0.140 1.90 42.6 43.6

Effective search space used: 6503425488

**15. Resistin|19-108**

Query= sp|Q9HD89|19-108

Length=90

|                                                          | Score  | E     |
|----------------------------------------------------------|--------|-------|
| Sequences producing significant alignments:              | (Bits) | Value |
| NC_030901.1 <i>Gordonia</i> phage ClubL, complete genome | 37.0   | 0.004 |

>NC\_030901.1 *Gordonia* phage ClubL, complete genome  
Length=92618

Score = 37.0 bits (84), Expect = 0.004, Method: Compositional matrix adjust.  
Identities = 25/77 (32%), Positives = 32/77 (42%), Gaps = 9/77 (12%)  
Frame = -2

```
Query 18      AGSLIF---RAISSIGLEQCQSVTSRGLATCPRGFAVTGCTC-----GSACGSWDVRAET 69
              AG+L+   R +S + LE   V  RGD+A  P+G A                G   +W VR E
Sbjct 56569   AGALVLEFERQLSRL-LESGRVQDRGDVAEDPKG IARVVRHWHLHRRGEPAAAWRVRTER 56393

Query 70      TCHCQCAGMDWTGARCC 86
              A   W G R C
Sbjct 56392   PRRSARAASRWAGRRSC 56342
```

|        |       |       |       |       |
|--------|-------|-------|-------|-------|
| Lambda | K     | H     | a     | alpha |
| 0.324  | 0.133 | 0.456 | 0.792 | 4.96  |

Gapped

|        |        |       |      |       |       |
|--------|--------|-------|------|-------|-------|
| Lambda | K      | H     | a    | alpha | sigma |
| 0.267  | 0.0410 | 0.140 | 1.90 | 42.6  | 43.6  |

Effective search space used: 2149205100

## Adiponectin

### 15. HUMAN Adiponectin

Query= sp|Q15848|ADIPO\_HUMAN Adiponectin OS=Homo sapiens GN=ADIPOQ PE=1  
SV=1

Length=244

| Sequences producing significant alignments: |                                                         | Score<br>(Bits) | E<br>Value |
|---------------------------------------------|---------------------------------------------------------|-----------------|------------|
| NC_003390.2                                 | Synechococcus phage P60, complete genome                | 55.5            | 7e-08      |
| NC_031039.1                                 | Bacillus phage AR9, complete genome                     | 54.7            | 1e-07      |
| NC_016072.1                                 | Megavirus chiliensis, complete genome                   | 53.1            | 5e-07      |
| NC_020842.1                                 | Cellulophaga phage phiST genomic sequence               | 52.8            | 6e-07      |
| NC_010324.1                                 | Enterobacteria phage phiEco32, complete genome          | 52.4            | 8e-07      |
| NC_029120.1                                 | Shigella phage 75/02 Stx, complete genome               | 52.4            | 9e-07      |
| NC_031001.1                                 | Gordonia phage Terapin, complete genome                 | 52.0            | 1e-06      |
| NC_025416.1                                 | Staphylococcus phage MCE-2014, complete genome          | 51.2            | 2e-06      |
| NC_032108.1                                 | Cedratvirus A11 genome assembly, complete genome: mo... | 51.2            | 2e-06      |
| NC_017972.1                                 | Pseudomonas phage Lull, complete genome                 | 50.4            | 3e-06      |
| NC_021782.1                                 | Salmonella phage FSL SP-076, complete genome            | 50.4            | 4e-06      |
| NC_014649.1                                 | Acanthamoeba polyphaga mimivirus, complete genome       | 50.1            | 4e-06      |
| NC_021308.1                                 | Mycobacterium phage HINdeR, complete genome             | 50.1            | 4e-06      |
| NC_023607.1                                 | Mycobacterium phage 40AC, complete genome               | 50.1            | 5e-06      |
| NC_021772.1                                 | Salmonella phage FSL SP-058, complete genome            | 49.3            | 7e-06      |
| NC_011356.1                                 | Enterobacteria phage YYZ-2008, complete prophage genome | 49.3            | 9e-06      |
| NC_022336.1                                 | Propionibacterium phage PHL010M04, complete genome      | 48.5            | 1e-05      |
| NC_000852.5                                 | Paramecium bursaria Chlorella virus 1, complete genome  | 48.5            | 1e-05      |
| NC_018285.1                                 | Streptococcus phage YMC-2011, complete genome           | 48.5            | 1e-05      |
| NC_023639.1                                 | Mimivirus terra2 genome                                 | 48.5            | 1e-05      |
| NC_031279.1                                 | Mycobacterium phage Bactobuster, complete genome        | 48.1            | 2e-05      |
| NC_018842.1                                 | Propionibacterium phage P1.1, complete genome           | 47.8            | 2e-05      |
| NC_016071.1                                 | Salmonella phage PVP-SE1, complete genome               | 47.8            | 3e-05      |
| NC_027351.1                                 | Salmonella phage SSE-121, complete genome               | 47.8            | 3e-05      |
| NC_027628.1                                 | Propionibacterium phage Lauchelly, complete genome      | 47.4            | 3e-05      |
| NC_018840.1                                 | Propionibacterium phage P100_1, complete genome         | 47.0            | 4e-05      |
| NC_022087.1                                 | Mycobacterium phage AnnaL29, complete genome            | 47.0            | 5e-05      |
| NC_021795.1                                 | Cellulophaga phage phi17:1, complete genome             | 46.6            | 6e-05      |
| NC_028965.1                                 | Mycobacterium phage Pioneer, complete genome            | 45.8            | 1e-04      |
| NC_020104.1                                 | Acanthamoeba polyphaga moumouvirus, complete genome     | 45.8            | 1e-04      |
| NC_027386.1                                 | Propionibacterium phage PHL152M00, complete genome      | 45.8            | 1e-04      |
| NC_028881.1                                 | Enterobacteria phage vB_EcoM_VR5, complete genome       | 45.8            | 1e-04      |
| NC_031238.1                                 | Mycobacterium phage Catalina, complete genome           | 45.4            | 1e-04      |
| NC_005902.1                                 | Lymphocystis disease virus - isolate China, complete... | 45.4            | 1e-04      |
| NC_030394.2                                 | Short-finned eel ranavirus isolate ANGA14001, comple... | 45.4            | 1e-04      |
| NC_027357.1                                 | Propionibacterium phage PHL025M00, complete genome      | 45.4            | 1e-04      |
| NC_027401.1                                 | Propionibacterium phage PHL095N00, complete genome      | 45.4            | 2e-04      |
| NC_004167.1                                 | Bacteriophage phi-105 DNA, complete sequence            | 45.4            | 2e-04      |
| NC_007056.1                                 | Staphylococcus phage EW, complete genome                | 45.4            | 2e-04      |
| NC_021791.1                                 | Cellulophaga phage phi12:1, complete genome             | 45.1            | 2e-04      |
| NC_023423.1                                 | Pithovirus sibericum isolate P1084-T, complete genome   | 45.1            | 2e-04      |
| NC_027621.1                                 | Propionibacterium phage Wizzo, complete genome          | 45.1            | 2e-04      |
| NC_027630.1                                 | Propionibacterium phage Ouroboros, complete genome      | 45.1            | 2e-04      |
| NC_009015.1                                 | Burkholderia ambifaria phage BcepF1, complete genome    | 45.1            | 2e-04      |
| NC_029072.1                                 | Salmonella phage 19, complete genome                    | 45.1            | 2e-04      |
| NC_025434.1                                 | Shigella phage POCJ13, complete genome                  | 45.1            | 2e-04      |
| NC_011357.1                                 | Stx2-converting phage 1717, complete prophage genome    | 45.1            | 2e-04      |

|             |                                                         |      |       |
|-------------|---------------------------------------------------------|------|-------|
| NC_009514.1 | Phage cdtI DNA, complete genome                         | 45.1 | 2e-04 |
| NC_022098.1 | Pandoravirus salinus, complete genome                   | 44.7 | 3e-04 |
| NC_031003.1 | Propionibacterium phage Moyashi, complete genome        | 44.7 | 3e-04 |
| NC_004813.1 | Enterobacteria phage BP-4795, complete genome           | 44.7 | 3e-04 |
| NC_011132.1 | Sputnik virophage, complete genome                      | 44.3 | 3e-04 |
| NC_007055.1 | Staphylococcus phage 37, complete genome                | 44.3 | 3e-04 |
| NC_027626.1 | Propionibacterium phage Procrass1, complete genome      | 44.3 | 3e-04 |
| NC_022340.1 | Propionibacterium phage PHL114L00, complete genome      | 44.3 | 3e-04 |
| NC_020197.1 | Streptococcus phage TP-J34 complete genome              | 44.3 | 3e-04 |
| NC_000871.1 | Streptococcus phage Sfi19, complete genome              | 44.3 | 4e-04 |
| NC_024210.1 | Escherichia phage e4/1c, complete genome                | 43.9 | 4e-04 |
| NC_017974.1 | Cronobacter phage CR3, complete genome                  | 43.9 | 5e-04 |
| NC_031256.1 | Mycobacterium phage Loser, complete genome              | 43.9 | 5e-04 |
| NC_027400.1 | Propionibacterium phage PHL055N00, complete genome      | 43.5 | 5e-04 |
| NC_018083.1 | Clostridium phage phiCPV4, complete genome              | 43.5 | 5e-04 |
| NC_017980.1 | Clostridium phage phiCP7R, complete genome              | 43.5 | 5e-04 |
| NC_021858.1 | Pandoravirus dulcis, complete genome                    | 43.5 | 6e-04 |
| NC_014792.1 | Enterobacteria phage vB_EcoM-VR7, complete genome       | 43.5 | 6e-04 |
| NC_033423.1 | Lymphocystis disease virus Sa isolate SA9, complete ... | 43.5 | 6e-04 |
| NC_022335.1 | Propionibacterium phage PHL067M10, complete genome      | 43.5 | 7e-04 |
| NC_028967.1 | Propionibacterium phage PAC1, complete genome           | 43.1 | 7e-04 |
| NC_031922.1 | Synechococcus phage S-CAM9 isolate 1109NB16, complet... | 43.1 | 7e-04 |
| NC_027367.1 | Propionibacterium phage PHL132N00, complete genome      | 43.1 | 7e-04 |
| NC_018846.1 | Escherichia phage P13374, complete genome               | 43.1 | 8e-04 |
| NC_031065.1 | Salmonella phage vB_SnwM_CGG4-1, complete genome        | 43.1 | 8e-04 |
| NC_014260.1 | Enterobacteria phage IME08, complete genome             | 43.1 | 8e-04 |
| NC_008464.1 | Stx2-converting phage 86, complete genome               | 43.1 | 8e-04 |
| NC_027389.1 | Propionibacterium phage PHL141N00, complete genome      | 43.1 | 8e-04 |
| NC_022968.1 | Enterobacteria phage 4MG, complete genome               | 43.1 | 8e-04 |
| NC_018839.1 | Propionibacterium phage P14.4, complete genome          | 43.1 | 9e-04 |
| NC_027333.1 | Propionibacterium phage PHL070N00, complete genome      | 43.1 | 9e-04 |
| NC_023716.1 | Mycobacterium phage Alma, complete genome               | 43.1 | 9e-04 |
| NC_027370.1 | Propionibacterium phage PHL179M00, complete genome      | 42.7 | 0.001 |
| NC_028685.1 | Shigella phage Ss-VASD, complete genome                 | 42.7 | 0.001 |
| NC_027354.1 | Propionibacterium phage PHL301M00, complete genome      | 42.7 | 0.001 |
| NC_031005.1 | Propionibacterium phage QueenBey, complete genome       | 42.7 | 0.001 |
| NC_018852.1 | Propionibacterium phage P100D, complete genome          | 42.7 | 0.001 |
| NC_026440.1 | Pandoravirus inopinatum isolate KlaHel, complete genome | 42.7 | 0.001 |
| NC_018841.1 | Propionibacterium phage P101A, complete genome          | 42.4 | 0.001 |
| NC_022337.1 | Propionibacterium phage PHL071N05, complete genome      | 42.4 | 0.001 |
| NC_027629.1 | Propionibacterium phage Attacne, complete genome        | 42.4 | 0.001 |
| NC_027385.1 | Propionibacterium phage PHL092M00, complete genome      | 42.4 | 0.001 |
| NC_003225.3 | White spot syndrome virus strain CN01, complete genome  | 42.4 | 0.001 |
| NC_023557.1 | Erwinia phage Ea35-70, complete genome                  | 42.4 | 0.002 |
| NC_027294.1 | Propionibacterium phage PHL150M00, complete genome      | 42.4 | 0.002 |
| NC_015453.1 | Propionibacterium phage PAS50 endogenous virus, comp... | 42.4 | 0.002 |
| NC_028660.1 | Escherichia phage phi191, complete genome               | 42.4 | 0.002 |
| NC_029077.1 | Mycobacterium phage VohminGhazi, complete genome        | 42.0 | 0.002 |
| NC_022985.1 | Mycobacterium phage Zaka, complete genome               | 42.0 | 0.002 |
| NC_022965.1 | Mycobacterium phage CloudWang3, complete genome         | 42.0 | 0.002 |
| NC_022334.1 | Propionibacterium phage PHL112N00, complete genome      | 42.0 | 0.002 |
| NC_025444.1 | Mycobacteriophage RedRock, complete genome              | 42.0 | 0.002 |
| NC_023717.1 | Cronobacter phage CR9, complete genome                  | 41.6 | 0.003 |
| NC_023609.1 | Mycobacterium phage RhynO, complete genome              | 41.6 | 0.003 |
| NC_029018.1 | Mycobacterium phage Anubis, complete genome             | 41.2 | 0.003 |
| NC_027362.1 | Propionibacterium phage PHL116M00, complete genome      | 41.2 | 0.003 |
| NC_027624.1 | Propionibacterium phage SKKY, complete genome           | 41.2 | 0.003 |
| NC_019442.1 | Escherichia phage TL-2011c, complete genome             | 41.2 | 0.004 |



|             |                                                         |      |       |
|-------------|---------------------------------------------------------|------|-------|
| NC_027625.1 | Propionibacterium phage Kubed, complete genome          | 41.2 | 0.004 |
| NC_018084.1 | Clostridium phage phiZP2, complete genome               | 41.2 | 0.004 |
| NC_010353.1 | Streptococcus phage 858, complete genome                | 41.2 | 0.004 |
| NC_031254.1 | Arthrobacter phage Kitkat, complete genome              | 40.8 | 0.004 |
| NC_027984.1 | Stx2 converting phage vB_EcoP_24B, complete genome      | 40.8 | 0.004 |
| NC_004913.3 | Stx1 converting phage DNA, complete genome              | 40.8 | 0.004 |
| NC_000902.1 | Enterobacteria phage VT2-Sakai, complete genome         | 40.8 | 0.004 |
| NC_000924.1 | Enterobacteria phage 933W, complete genome              | 40.8 | 0.004 |
| NC_004914.3 | Stx2 converting phage II DNA, complete genome           | 40.8 | 0.004 |
| NC_010237.1 | Enterobacteria phage Min27, complete genome             | 40.8 | 0.004 |
| NC_028449.1 | Escherichia phage PA2, complete genome                  | 40.8 | 0.004 |
| NC_028656.1 | Enterobacteria phage VT2phi_272, complete sequence      | 40.8 | 0.004 |
| NC_018838.1 | Propionibacterium phage P100_A, complete genome         | 40.8 | 0.004 |
| NC_019914.1 | Staphylococcus phage StB27, complete genome             | 40.8 | 0.005 |
| NC_002515.1 | Mycoplasma phage P1, complete genome                    | 40.8 | 0.005 |
| NC_009541.1 | Propionibacterium phage PA6, complete genome            | 40.8 | 0.005 |
| NC_027295.1 | Propionibacterium phage PHL199M00, complete genome      | 40.4 | 0.006 |
| NC_024789.1 | Escherichia phage vB_EcoS_AKS96, complete genome        | 40.4 | 0.007 |
| NC_031074.1 | Gordonia phage Bantam, complete genome                  | 40.0 | 0.007 |
| NC_031927.1 | Synechococcus phage S-CAM7 isolate 0910CC49, complet... | 40.0 | 0.007 |
| NC_020490.2 | Staphylococcus phage StB12, complete genome             | 40.0 | 0.008 |
| NC_024354.1 | Cronobacter phage CR8, complete genome                  | 40.0 | 0.008 |
| NC_020205.1 | Xanthomonas citri phage CP2 DNA, complete genome        | 40.0 | 0.008 |
| NC_018270.1 | Weissella phage phiYS61, complete genome                | 40.0 | 0.008 |
| NC_018851.1 | Propionibacterium phage ATCC29399B_C, complete genome   | 40.0 | 0.009 |
| NC_018847.1 | Propionibacterium phage ATCC29399B_T, complete genome   | 40.0 | 0.009 |
| NC_030901.1 | Gordonia phage ClubL, complete genome                   | 40.0 | 0.009 |
| NC_030696.1 | Gordonia phage Smoothie, complete genome                | 40.0 | 0.009 |
| NC_031029.1 | Gordonia phage Cucurbita, complete genome               | 40.0 | 0.009 |
| NC_030936.1 | Gordonia phage Bachita, complete genome                 | 40.0 | 0.009 |
| NC_023731.1 | Mycobacterium phage Trixie, complete genome             | 39.7 | 0.011 |
| NC_007734.1 | Bacillus phage WBeta, complete genome                   | 39.7 | 0.011 |
| NC_027627.1 | Propionibacterium phage Solid, complete genome          | 39.7 | 0.012 |
| NC_027623.1 | Propionibacterium phage Pirate, complete genome         | 39.3 | 0.013 |
| NC_004682.1 | Mycobacterium phage Bxz2, complete genome               | 39.3 | 0.013 |
| NC_031084.1 | Propionibacterium phage BruceLethal, complete genome    | 39.3 | 0.013 |
| AC_000012.1 | Murine adenovirus A, complete genome                    | 39.3 | 0.014 |
| NC_000942.1 | Murine adenovirus A, complete genome                    | 39.3 | 0.014 |
| NC_027361.1 | Propionibacterium phage PHL085N00, complete genome      | 39.3 | 0.016 |
| NC_028798.1 | Mycobacterium phage MarQuardt, complete genome          | 39.3 | 0.016 |
| NC_015463.1 | Synechococcus phage S-CBS2, complete genome             | 38.9 | 0.019 |
| NC_027346.1 | Propionibacterium phage PHL171M01, complete genome      | 38.9 | 0.021 |
| NC_024793.1 | Escherichia phage vB_EcoS_AHP42, complete genome        | 38.5 | 0.022 |
| NC_020883.1 | Bacillus phage PM1 DNA, complete genome                 | 38.5 | 0.022 |
| NC_028957.1 | Enterobacteria phage vB_EcoM_VR26, complete genome      | 38.5 | 0.023 |
| NC_028774.1 | Klebsiella phage Sushi, complete genome                 | 38.5 | 0.024 |
| NC_019400.1 | Cronobacter phage vB_CsaM_GAP31, complete genome        | 38.5 | 0.024 |
| NC_024141.1 | Mycobacterium phage Kamy, complete genome               | 38.5 | 0.027 |
| NC_022990.1 | Zamilon virophage complete genome                       | 38.5 | 0.027 |
| NC_023562.1 | Mycobacterium phage BellusTerra, complete genome        | 38.5 | 0.028 |
| NC_018834.1 | Propionibacterium phage P9.1, complete genome           | 38.5 | 0.029 |
| NC_022096.1 | Pseudomonas phage PaBG, complete genome                 | 38.5 | 0.029 |
| NC_023719.1 | Bacillus phage G, complete genome                       | 38.1 | 0.030 |
| NC_023565.1 | Mycobacterium phage Nyxis, complete genome              | 38.1 | 0.032 |
| NC_028925.1 | Enterobacteria phage vB_EcoM_VR25, complete genome      | 38.1 | 0.032 |
| NC_022776.1 | Streptococcus phage TP-778L complete genome             | 38.1 | 0.033 |
| NC_015454.1 | Propionibacterium phage PAD20 endogenous virus, comp... | 37.7 | 0.042 |
| NC_020201.1 | Pectobacterium phage phiTE, complete genome             | 37.7 | 0.045 |

|             |                                                         |      |       |
|-------------|---------------------------------------------------------|------|-------|
| NC_027371.1 | Propionibacterium phage Pacnes 2012-15, complete genome | 37.7 | 0.047 |
| NC_028672.1 | Cronobacter phage PBES 02, complete genome              | 37.7 | 0.047 |
| NC_018853.1 | Streptomyce phage TG1, complete genome                  | 37.7 | 0.052 |
| NC_013645.1 | Streptococcus phage Abc2, complete genome               | 37.4 | 0.056 |
| NC_015569.1 | Synechococcus phage S-CRM01, complete genome            | 37.4 | 0.058 |
| NC_024148.1 | Mycobacterium phage Phantastic, complete genome         | 37.4 | 0.064 |
| NC_022341.1 | Propionibacterium phage PHL113M01, complete genome      | 37.0 | 0.071 |
| NC_018849.1 | Propionibacterium phage P105, complete genome           | 37.0 | 0.078 |
| NC_011023.1 | Mycobacterium phage Pukovnik, complete genome           | 36.6 | 0.095 |

>NC\_003390.2 Synechococcus phage P60, complete genome  
Length=46675

Score = 55.5 bits (132), Expect = 7e-08, Method: Compositional matrix adjust.  
Identities = 34/66 (52%), Positives = 42/66 (64%), Gaps = 0/66 (0%)  
Frame = +1

```
Query 40      MAGIPGHPGHNGAPGRDGRDGTPEKGEKGDPLIGPKGDIGETGVPGAEGPRGFPGIQG 99
           + G PG+ G +GA G +G G G G G G G GPKGD G+TG PGA+GP+G PG QG
Sbjct 39178   LKGDPNGNDGADGATGPEGPQGPQGNPGADGADGAQGPKGDKGDTGDPGAQGPQGNPGDQG 39357
```

```
Query 100     RKGEPG 105
           +G PG
Sbjct 39358   PQGNPG 39375
```

Score = 43.5 bits (101), Expect = 7e-04, Method: Compositional matrix adjust.  
Identities = 44/144 (31%), Positives = 64/144 (44%), Gaps = 11/144 (8%)  
Frame = +1

```
Query 48      GHNGAPGRDGRDGTPEKGEKGDPLIGPK---GDIGETGVPGAEGPRGF---PGIQGRK 101
           G+ GA G DG G G+KG+ GDPG GP+ GD G G PGA+G G G QG +
Sbjct 39247   GNPADGADGAQGPKGDKGDTGDPGAQGPQGNPGDQGPQGNPGADGADGAIGPEGPQGPQ 39426
```

```
Query 102     GEPGEGAYVYRSAFSVGLETYVTIPNMPPIRFTKIFYNQQN-HYDGSTGKFHCN-IPGLYY 159
           G G + +A +V + + + + I + Q + Y+GS F N + G
Sbjct 39427   GPEGPEGPMSTAALTVDINSDIASASRAIIYAPGSNGQASLKYNGS---FLINPLNGTLT 39597
```

```
Query 160     FAYHITVYMKDKVKSFLFKDKAML 183
           I DV V+ + +
Sbjct 39598   APTFIGDLTGDVSVATISSSGSNI 39669
```

Score = 38.9 bits (89), Expect = 0.018, Method: Compositional matrix adjust.  
Identities = 34/83 (41%), Positives = 42/83 (51%), Gaps = 16/83 (19%)  
Frame = +1

```
Query 40      MAGIPGHPGHNGAPGRDGRDGTPEKGEKGD-----PGLIGPKGDIGETGVP 86
           + G G PG +GA G G G GE+G +G PG GPKGD G+TG
Sbjct 38950   LQGPQGLPGADGADGAQGPQGIQGEQGLQGPQGLPGADGADSTVPGPQGPKGDKGDTGDA 39129
```

```
Query 87      GAEGPR---GFPGIQGRKGEPGE 106
           G +GP+ G G QG KG+PG
Sbjct 39130   GPQGPKGDTGDAGPQGLKGDPGN 39198
```

>NC\_031039.1 Bacillus phage AR9, complete genome

Length=251042

Score = 54.7 bits (130), Expect = 1e-07, Method: Compositional matrix adjust.  
Identities = 31/65 (48%), Positives = 36/65 (55%), Gaps = 0/65 (0%)  
Frame = -2

Query 42 GIPGHPGHNGAPGRDGRDGTPEKGEKGDPLIGPKGDIGETGVPGAEGPRGFPGIQGRK 101  
G G G G G G G GEKGE+GDPG G G G G+PG +G +G G QG +  
Sbjct 10522 GETGEKGEQGERGEKGEQKSGEKGERGDPGPRGEPGPAGMDGIPGEKGEQGEKGEQGER 10343

Query 102 GEPGE 106  
GE GE  
Sbjct 10342 GEKGE 10328

Score = 51.6 bits (122), Expect = 1e-06, Method: Compositional matrix adjust.  
Identities = 31/65 (48%), Positives = 35/65 (54%), Gaps = 0/65 (0%)  
Frame = -2

Query 42 GIPGHPGHNGAPGRDGRDGTPEKGEKGDPLIGPKGDIGETGVPGAEGPRGFPGIQGRK 101  
G G G G G G G GE+GEKG+ G G KG+ G+ G G GP G GI G K  
Sbjct 10558 GEKGEQGEKGEKGETGEKGEQGERGEKGEQKSGEKGERGDPGPRGEPGPAGMDGIPGEK 10379

Query 102 GEPGE 106  
GE GE  
Sbjct 10378 GEQGE 10364

Score = 50.4 bits (119), Expect = 4e-06, Method: Compositional matrix adjust.  
Identities = 30/65 (46%), Positives = 34/65 (52%), Gaps = 0/65 (0%)  
Frame = -2

Query 42 GIPGHPGHNGAPGRDGRDGTPEKGEKGDPLIGPKGDIGETGVPGAEGPRGFPGIQGRK 101  
G G G G G G G GEKGE+G G G +GD G G PG G G PG +G +  
Sbjct 10549 GEQGEKGEKGETGEKGEQGERGEKGEQKSGEKGERGDPGPRGEPGPAGMDGIPGEKGEQ 10370

Query 102 GEPGE 106  
GE GE  
Sbjct 10369 GEKGE 10355

Score = 50.1 bits (118), Expect = 5e-06, Method: Compositional matrix adjust.  
Identities = 31/65 (48%), Positives = 34/65 (52%), Gaps = 0/65 (0%)  
Frame = -2

Query 42 GIPGHPGHNGAPGRDGRDGTPEKGEKGDPLIGPKGDIGETGVPGAEGPRGFPGIQGRK 101  
G G G G G G G GEKGE+G+ G G +G GE G G GPRG PG G  
Sbjct 10576 GKQGERGEKGEQGEKGEKGETGEKGEQGERGEKGEQKSGEKGERGDPGPRGEPGPAGMD 10397

Query 102 GEPGE 106  
G PGE  
Sbjct 10396 GIPGE 10382

Score = 48.1 bits (113), Expect = 2e-05, Method: Compositional matrix adjust.  
Identities = 27/50 (54%), Positives = 33/50 (66%), Gaps = 3/50 (6%)  
Frame = -2

Query 57 GRDGTPEGEKGEKGDPLIGPKGDIGETGVPGAEGPRGFPGIQGRKGEPGE 106  
G+DG GE+GEKG+ G KG+ GETG G +G RG G QG+ GE GE  
Sbjct 10585 GKDGKQGERGEKGEQ---GEKGEKGETGEKGEQGERGEKGEQKSGEKGE 10445

Score = 45.8 bits (107), Expect = 1e-04, Method: Compositional matrix adjust.  
Identities = 27/58 (47%), Positives = 33/58 (57%), Gaps = 0/58 (0%)  
Frame = -2

Query 48 GHNGAPGRDGRDGTPEGEKGEKGDPLIGPKGDIGETGVPGAEGPRGFPGIQGRKGEPG 105  
G +G G G G GEKGEKG+ G G +G+ GE G G G +G G G +GEPG  
Sbjct 10585 GKDGKQGERGEKGEQGEKGEKGETGEKGEQGERGEKGEQKSGEKGERGDPGPRGEPG 10412

Score = 40.8 bits (94), Expect = 0.005, Method: Compositional matrix adjust.  
Identities = 26/67 (39%), Positives = 35/67 (52%), Gaps = 3/67 (4%)  
Frame = -2

Query 41 AGIPGHPGHNGAPGRDGRDGTPEGEKGE---KGDPLIGPKGDIGETGVPGAEGPRGFPGI 97  
G G G G G G+ G GE+G+ +G+PG G G GE G G +G +G G  
Sbjct 10516 TGEKGEQGERGEKGEQKSGEKGERGDPGPRGEPGPAGMDGIPGEKGEQGEKGEQGERGE 10337

Query 98 QGRKGEP 104  
+G KG+P  
Sbjct 10336 KGEKGD 10316

>NC\_016072.1 Megavirus chiliensis, complete genome  
Length=1259197

Score = 53.1 bits (126), Expect = 5e-07, Method: Compositional matrix adjust.  
Identities = 27/60 (45%), Positives = 35/60 (58%), Gaps = 0/60 (0%)  
Frame = -3

Query 47 PGHNGAPGRDGRDGTPEGEKGEKGDPLIGPKGDIGETGVPGAEGPRGFPGIQGRKGEPGE 106  
G G PG++G G PG KG+KGD I KGD G+ G+ G G +G G G KG+ G+  
Sbjct 679361 KGDKGDPGKNGKGLKGDPLKQKGDGSTMKGDKGDIGIKQNGSKGLKGRIGNKGQKGD 679182

Score = 50.4 bits (119), Expect = 3e-06, Method: Compositional matrix adjust.  
Identities = 40/97 (41%), Positives = 46/97 (47%), Gaps = 2/97 (2%)  
Frame = +1

Query 42 GIPGHPGHNGAPGRDGRDGTPEGEKGEKGDPLIGPKGDIGETGVPGAEGPRGFPGIQGRK 101  
G G G+ G G G G GEKGEKGD G G KGD+GE G G G +G G G K  
Sbjct 272875 GEKGDGFGNKGEKGNSEKGDGDLGEKGEKGDIGDKGEKGDGDLGEKGEKGERGYKGEKGDGDLGEK 273054

Query 102 GEPGEGAYVYRSVGLTYVTIPNMPPIRFTKIFYN 138  
GE G+ S S + TY+ P FT N  
Sbjct 273055 GEKGDGDLGEKGESGTSSFISTYLNT--TPGAFTSTVFN 273159

Score = 48.9 bits (115), Expect = 1e-05, Method: Compositional matrix adjust.  
Identities = 30/62 (48%), Positives = 39/62 (63%), Gaps = 0/62 (0%)  
Frame = +2

Query 45 GHPGHNGAPGRDGRDGTPEGEKGEKGDPLIGPKGDIGETGVPGAEGPRGFPGIQGRKGEP 104  
G+ G G G G DG GEKG+ GD GL G KGDIG+ G+ G +G G G++G KG+

Sbjct 275528 GNDGLKGEKGDIGDDGLKGEKGDIGDDGLKGEKGDIGDDGLKGEKGDLDGNDGLKGEKGD I 275707  
Query 105 GE 106  
G+  
Sbjct 275708 GD 275713

Score = 48.9 bits (115), Expect = 1e-05, Method: Compositional matrix adjust.  
Identities = 32/62 (52%), Positives = 34/62 (55%), Gaps = 0/62 (0%)  
Frame = +1

Query 45 GHPGHNGAPGRDGRDGTTPGEKGEKGDPLIGPKGDIGETGVPGAEGPRGFPGIQRKGEPE 104  
G G G G G G GEKGEKGD G G KGD+GE G G G +G G G KGE  
Sbjct 276658 GEKGEKGDLSGEKGEKGDLSGEKGEKGDLDGEKGEKGDLDGEKGEKGDVGDVKGEKGETGDKGEK 276837  
Query 105 GE 106  
GE  
Sbjct 276838 GE 276843

Score = 48.5 bits (114), Expect = 1e-05, Method: Compositional matrix adjust.  
Identities = 32/69 (46%), Positives = 41/69 (59%), Gaps = 3/69 (4%)  
Frame = +2

Query 40 MAGIPGHPGHNGAPGRDG---RDGTTPGEKGEKGDPLIGPKGDIGETGVPGAEGPRGFPG 96  
+ G G G+NG G G DG GEK+ GD GL G KGDIG+ G+ G +G G G  
Sbjct 275468 LKGEKGDLDGNNGLKGEKGDLDGNDGLKGEKGDIGDDGLKGEKGDIGDDGLKGEKGDIGDDG 275647  
Query 97 IQGRKGEPE 105  
++G KG+ G  
Sbjct 275648 LKGEKGDLDG 275674

Score = 48.1 bits (113), Expect = 2e-05, Method: Compositional matrix adjust.  
Identities = 32/62 (52%), Positives = 34/62 (55%), Gaps = 0/62 (0%)  
Frame = +1

Query 45 GHPGHNGAPGRDGRDGTTPGEKGEKGDPLIGPKGDIGETGVPGAEGPRGFPGIQRKGEPE 104  
G G G G G G GEKGEKGD G G KGD+GE G G G +G G G KGE  
Sbjct 276631 GEKGEKGDLDGEKGEKGDLSGEKGEKGDLSGEKGEKGDLDGEKGEKGDLDGEKGEKGDVGDVKGEK 276810  
Query 105 GE 106  
GE  
Sbjct 276811 GE 276816

Score = 47.4 bits (111), Expect = 3e-05, Method: Compositional matrix adjust.  
Identities = 31/62 (50%), Positives = 34/62 (55%), Gaps = 0/62 (0%)  
Frame = +1

Query 45 GHPGHNGAPGRDGRDGTTPGEKGEKGDPLIGPKGDIGETGVPGAEGPRGFPGIQRKGEPE 104  
G G G G G G GEKGEKGD G G KGD+GE G G G +G G G KGE  
Sbjct 276550 GEKGEKGDLDGEKGEKGDLDGEKGEKGDLDGEKGEKGDLSGEKGEKGDLSGEKGEK 276729  
Query 105 GE 106  
G+  
Sbjct 276730 GD 276735

Score = 47.4 bits (111), Expect = 3e-05, Method: Compositional matrix adjust.  
Identities = 32/62 (52%), Positives = 34/62 (55%), Gaps = 0/62 (0%)  
Frame = +1

Query 45 GHPGHNGAPGRDGRDGTTPGEKGEKGDPLIGPKGDIGETGVPGAEGPRGFPGIQGRKGE 104  
G G G G G G GEKGEKGD G G KGDIG+ G G G +G G G KGE  
Sbjct 276874 GDKGEKGETGDKGEKGDLEKGEKGDLEKGEKGDIGDKGEKGETGDKGEKGETGDKGEK 277053

Query 105 GE 106  
GE  
Sbjct 277054 GE 277059

Score = 47.4 bits (111), Expect = 4e-05, Method: Compositional matrix adjust.  
Identities = 31/65 (48%), Positives = 37/65 (57%), Gaps = 0/65 (0%)  
Frame = +1

Query 42 GIPGHPGHNGAPGRDGRDGTTPGEKGEKGDPLIGPKGDIGETGVPGAEGPRGFPGIQGRK 101  
G G G G G G G G+KGEKGD G IG KGD G+ G G +G +G G +G K  
Sbjct 272686 GEKGDSDGDKGEKGDLEKGEKGNIGDKGEKGDMDIGLKGDKGDVGDKGEKGDKGDSDGKGEK 272865

Query 102 GEPGE 106  
G+ GE  
Sbjct 272866 GDIGE 272880

Score = 47.0 bits (110), Expect = 4e-05, Method: Compositional matrix adjust.  
Identities = 31/65 (48%), Positives = 35/65 (54%), Gaps = 0/65 (0%)  
Frame = +1

Query 42 GIPGHPGHNGAPGRDGRDGTTPGEKGEKGDPLIGPKGDIGETGVPGAEGPRGFPGIQGRK 101  
G G G G G G G GEKGEKGD G G KGD+G+ G G G +G G G K  
Sbjct 276676 GDSGEKGEKGDSDGKGEKGDLEKGEKGDLEKGEKGDVGDKGEKGETGDKGEKGETGDK 276855

Query 102 GEPGE 106  
GE G+  
Sbjct 276856 GEKGD 276870

Score = 46.6 bits (109), Expect = 7e-05, Method: Compositional matrix adjust.  
Identities = 30/65 (46%), Positives = 39/65 (60%), Gaps = 0/65 (0%)  
Frame = +1

Query 42 GIPGHPGHNGAPGRDGRDGTTPGEKGEKGDPLIGPKGDIGETGVPGAEGPRGFPGIQGRK 101  
G G G G G G G GEKG+ GD GL G KGD+G+TG+ G +G G G++G K  
Sbjct 873385 GEKGDIGDTGLKGEKGDIGDKGEKGDIGDTGLKGEKGDIGDTGLKGEKGDIGDTGLKGEK 873564

Query 102 GEPGE 106  
G+ G+  
Sbjct 873565 GDIGD 873579

Score = 46.2 bits (108), Expect = 8e-05, Method: Compositional matrix adjust.  
Identities = 30/71 (42%), Positives = 34/71 (48%), Gaps = 6/71 (8%)  
Frame = -3

Query 42 GIPGHPGHNGAPGRDGRDGTTPGE-----KGEKGDPLIGPKGDIGETGVPGAEGPRGF 95

GI G G G GR G G G+ KGE G G IG KGDIG G G++G G  
 Sbjct 679250 GIKGQNGSKGLKGRIGNKGQKGDSDGSSNMKGETGSKGDIGSKGDIGSKGDIGSKGESGST 679071

Query 96 GIQGRKGEPEG 106  
 +G KG G  
 Sbjct 679070 AEKGDKGNDGN 679038

Score = 46.2 bits (108), Expect = 9e-05, Method: Compositional matrix adjust.  
 Identities = 27/69 (39%), Positives = 39/69 (57%), Gaps = 0/69 (0%)  
 Frame = +2

Query 48 GHNGAPGRDGRDGTPEKKEKGDPLIGPKGDIGETGVPGAEGPRGFPGIQRKGEPEG 107  
 G G G G DG+ G+KG+ G+ GL G KGDIG G+ G +G G G++G+KG+ G+  
 Sbjct 274934 GSKGEKGNIGNDGSKGQKGDIGNNGLKGQKGDIGNNGLKGQKGDIGNNGLKGQKGDIGDK 275113

Query 108 AYVYRSAFS 116  
 +  
 Sbjct 275114 GNIGNDGLK 275140

Score = 45.8 bits (107), Expect = 1e-04, Method: Compositional matrix adjust.  
 Identities = 31/65 (48%), Positives = 39/65 (60%), Gaps = 0/65 (0%)  
 Frame = +1

Query 42 GIPGHPGHNGAPGRDGRDGTPEKKEKGDPLIGPKGDIGETGVPGAEGPRGFPGIQRK 101  
 G G G G G G G G+KGEKGD G G KGDIG+TG+ G +G G G++G K  
 Sbjct 873601 GDKGEKGDIGDTGLKGDKGDLGDKGEKGDIGDKGEKGDIGDTGLKGDKDLGDTGLKGDK 873780

Query 102 GEPGE 106  
 G+ G+  
 Sbjct 873781 GDIGD 873795

Score = 45.8 bits (107), Expect = 1e-04, Method: Compositional matrix adjust.  
 Identities = 28/68 (41%), Positives = 32/68 (47%), Gaps = 3/68 (4%)  
 Frame = -3

Query 42 GIPGHPGHNGAPGRDGRDGTPEKKEKGDPL---IGPKGDIGETGVPGAEGPRGFPGIQ 98  
 G+ G G+ G G G GE G KGD G IG KGDIG G G+ +G G  
 Sbjct 679223 GLKGRIGNKGQKGDSDGSSNMKGETGSKGDIGSKGDIGSKGDIGSKGESGSTAEKGDKGND 679044

Query 99 GRKGEPEG 106  
 G KG G  
 Sbjct 679043 GNKGNDGN 679020

Score = 45.8 bits (107), Expect = 1e-04, Method: Compositional matrix adjust.  
 Identities = 32/70 (46%), Positives = 39/70 (56%), Gaps = 3/70 (4%)  
 Frame = +2

Query 40 MAGIPGHPGHNGAPGRD---GRDGTPEKKEKGDPLIGPKGDIGETGVPGAEGPRGFPG 96  
 + G G G G RD G G PG KG KG+ G IG KG+ GE G G +G +G PG  
 Sbjct 274241 IRGKHGTKGEKGESCRDLTKGEKGDPGNKGNGEKGKDIGNKGNKGEKGDIGNKGEKGD 274420

Query 97 IQGRKGEPEG 106  
 +G KGE G+  
 Sbjct 274421 NKGEKGEKGD 274450

Score = 45.4 bits (106), Expect = 1e-04, Method: Compositional matrix adjust.  
Identities = 28/62 (45%), Positives = 38/62 (61%), Gaps = 0/62 (0%)  
Frame = +2

Query 45 GHPGHNGAPGRDGRDGTPEKGEKGDPLIGPKGDIGETGVPGAEGPRGFPGIQGRKGE 104  
G+ G G G G DG GEKG+ G+ GL G KGD+G G+ G +G G G++G KG+  
Sbjct 275384 GNDGLKGNKGDLDGNDGLKGEKGDLDGNDGLKGEKGDLDGNDGLKGEKGDLDGNDGLKGEKGD 275563

Query 105 GE 106  
G+  
Sbjct 275564 GD 275569

Score = 45.4 bits (106), Expect = 2e-04, Method: Compositional matrix adjust.  
Identities = 31/75 (41%), Positives = 40/75 (53%), Gaps = 0/75 (0%)  
Frame = +1

Query 41 AGIPGHPGHNGAPGRDGRDGTPEKGEKGDPLIGPKGDIGETGVPGAEGPRGFPGIQGR 100  
G+ G G G G G G G G+KGEKGD G G KGDIG+TG+ G +G G G +G  
Sbjct 873508 TGLKGEKGDIGDTGLKGEKGDIGDKGEKGDLDGDKGEKGDIGDTGLKGDKGDLDGDKGEKGD 873687

Query 101 KGEPGEGAYVYRSAF 115  
G+ GE + +  
Sbjct 873688 IGDKGEKGDIGDTGL 873732

Score = 45.4 bits (106), Expect = 2e-04, Method: Compositional matrix adjust.  
Identities = 36/86 (42%), Positives = 42/86 (49%), Gaps = 1/86 (1%)  
Frame = +2

Query 42 GIPGHPGHNGAPGRDGRDGTPEKGEKGDPLIGPKGDIGETGVPGAEGPRGFPGIQGRK 101  
G G+ G G G G G PG KGEKG+ G IG KGDIG G G +G G G +G  
Sbjct 274355 GNKGNKGEKGDIGNKGEKGDGNKGEKGDIGNKGDIGNKGDIGNKGDIGNKGEKGD 274534

Query 102 GEPGE-GAYVYRSAFSVGLETYVTIP 126  
G GE G + + T V IP  
Sbjct 274535 GNKGEKGDIGDKGVNGSQILTGVGIP 274612

Score = 45.1 bits (105), Expect = 2e-04, Method: Compositional matrix adjust.  
Identities = 31/65 (48%), Positives = 38/65 (58%), Gaps = 0/65 (0%)  
Frame = +1

Query 42 GIPGHPGHNGAPGRDGRDGTPEKGEKGDPLIGPKGDIGETGVPGAEGPRGFPGIQGRK 101  
G G G G G G G G KGEKGD G G KGDIG+TG+ G +G G G++G K  
Sbjct 873349 GDKGEKGDIGDKGEKGDIGDTGLKGEKGDIGDKGEKGDIGDTGLKGEKGDLDGDTGLKGEK 873528

Query 102 GEPGE 106  
G+ G+  
Sbjct 873529 GDIGD 873543

Score = 45.1 bits (105), Expect = 2e-04, Method: Compositional matrix adjust.  
Identities = 32/65 (49%), Positives = 35/65 (54%), Gaps = 0/65 (0%)  
Frame = +1



Query 42 GIPGHPGHNGAPGRDGRDGTTPGEKGEKGDPLIGPKGDIGETGVPGAEGPRGFPGIQGRK 101  
 G G G G G G G G G+KGEKGD G G KGD+GE G G G +G G G K  
 Sbjct 276838 GETGDKGEKGDLDGDKGEKGETGDKGEKGDLDGDKGEKGDLDGDKGEKGDIGDKGEKGETGDK 277017

Query 102 GEPGE 106  
 GE GE  
 Sbjct 277018 GEKGE 277032

Score = 44.7 bits (104), Expect = 2e-04, Method: Compositional matrix adjust.  
 Identities = 31/76 (41%), Positives = 40/76 (53%), Gaps = 0/76 (0%)  
 Frame = +1

Query 40 MAGIPGHPGHNGAPGRDGRDGTTPGEKGEKGDPLIGPKGDIGETGVPGAEGPRGFPGIQG 99  
 + G G G G G G G G GEKG+ GD GL G KGDIG+TG+ G +G G G +G  
 Sbjct 873415 LKGEKGDIGDKGEKGDIGDTGLKGEKGDLDGDTGLKGEKGDIGDTGLKGEKGDIGDKGEK 873594

Query 100 RKGEPGEGAYVYRSAF 115  
 G+ GE + +  
 Sbjct 873595 DLGDKGEKGDIGDTGL 873642

Score = 44.7 bits (104), Expect = 2e-04, Method: Compositional matrix adjust.  
 Identities = 34/90 (38%), Positives = 42/90 (47%), Gaps = 4/90 (4%)  
 Frame = +1

Query 45 GHPGHNGAPGRDGRDGTTPGEKGEKGDPLIGPKGDIGETGVPGAEGPRGFPGIQGRKGE 104  
 G G G G G G G G+KGEKG+ G G KGD+G+ G G G +G G G KGE  
 Sbjct 276982 GDKGEKGETGDKGEKGETGDKGEKGETGDKGEKGDVGDKGEKGETGDKGEKGETGDKGEK 277161

Query 105 GE----GAYVYRSAFSVGLETYVTIPNMPI 130  
 G+ G + ET V+ N I  
 Sbjct 277162 GDIGDKGETATCEIVNTDGETRVSACNTGI 277251

Score = 44.7 bits (104), Expect = 2e-04, Method: Compositional matrix adjust.  
 Identities = 31/62 (50%), Positives = 33/62 (53%), Gaps = 0/62 (0%)  
 Frame = +1

Query 45 GHPGHNGAPGRDGRDGTTPGEKGEKGDPLIGPKGDIGETGVPGAEGPRGFPGIQGRKGE 104  
 G G G G G G G GEKGEKGD G G KGD GE G G G +G G G KGE  
 Sbjct 276577 GEKGEKGDLDGDKGEKGDLDGDKGEKGDLDGDKGEKGDSDGDKGEKGDSDGDKGEKGDLDGDKGEK 276756

Query 105 GE 106  
 G+  
 Sbjct 276757 GD 276762

Score = 44.7 bits (104), Expect = 2e-04, Method: Compositional matrix adjust.  
 Identities = 28/62 (45%), Positives = 39/62 (63%), Gaps = 0/62 (0%)  
 Frame = +2

Query 45 GHPGHNGAPGRDGRDGTTPGEKGEKGDPLIGPKGDIGETGVPGAEGPRGFPGIQGRKGE 104  
 G+ G G G G +G GEKG+ G+ GL G KGDIG+ G+ G +G G G++G KG+  
 Sbjct 275456 GNDGLKGEKGDLDGNNGLKGEKGDLDGNDGLKGEKGDIGDDGLKGEKGDIGDDGLKGEKGDIG 275635

Query 105 GE 106  
 G+

Sbjct 275636 GD 275641

Score = 44.7 bits (104), Expect = 3e-04, Method: Compositional matrix adjust.  
Identities = 28/62 (45%), Positives = 38/62 (61%), Gaps = 0/62 (0%)  
Frame = +2

Query 45 GHPGHNGAPGRDGRDGTPEKGEKGDPLIGPKGDIGETGVPGAEGPRGFPGIQGRKGEP 104  
G+ G G G G DG GEKG+ G+ GL G KGD+G G+ G +G G G++G KG+  
Sbjct 275420 GNDGLKGEKGDLDGNDGLKGEKGDLDGNNGLKGEKGDLDGNDGLKGEKGDIGDDGLKGEKEDI 275599

Query 105 GE 106  
G+  
Sbjct 275600 GD 275605

Score = 44.7 bits (104), Expect = 3e-04, Method: Compositional matrix adjust.  
Identities = 31/62 (50%), Positives = 33/62 (53%), Gaps = 0/62 (0%)  
Frame = +1

Query 45 GHPGHNGAPGRDGRDGTPEKGEKGDPLIGPKGDIGETGVPGAEGPRGFPGIQGRKGEP 104  
G G G G G G GEKGEKGD G G KGD GE G G G +G G G KGE  
Sbjct 276604 GEKGEKGDLDGEKGEKGDLDGEKGEKGDSEKGEKGDSEKGEKGDLDGEKGEKGDLDGEKGEK 276783

Query 105 GE 106  
G+  
Sbjct 276784 GD 276789

Score = 44.3 bits (103), Expect = 3e-04, Method: Compositional matrix adjust.  
Identities = 32/65 (49%), Positives = 38/65 (58%), Gaps = 0/65 (0%)  
Frame = +2

Query 42 GIPGHPGHNGAPGRDGRDGTPEKGEKGDPLIGPKGDIGETGVPGAEGPRGFPGIQGRK 101  
G G G G G G DG GEKG+ GD GL G KGDIG+ G+ G +G +G G G K  
Sbjct 336539 GEKGDIGDKGEKGDGDFDGLKGEKGDGDFDGLKGDGKGDIGDNLKGDGKGEKGDIGDNLK 336718

Query 102 GEPGE 106  
G+ GE  
Sbjct 336719 GDKGE 336733

Score = 44.3 bits (103), Expect = 3e-04, Method: Compositional matrix adjust.  
Identities = 30/66 (45%), Positives = 38/66 (58%), Gaps = 0/66 (0%)  
Frame = +1

Query 41 AGIPGHPGHNGAPGRDGRDGTPEKGEKGDPLIGPKGDIGETGVPGAEGPRGFPGIQGR 100  
G+ G G G G G G GEKG+ GD GL G KGD+G+TG+ G +G G G +G  
Sbjct 873634 TGLKGDGDLGDKGEKGDIGDKGEKGDIGDTGLKGDGDLGDTGLKGDGKGDIGDKGEKGD 873813

Query 101 KGEPGE 106  
G+ GE  
Sbjct 873814 IGDKGE 873831

Score = 44.3 bits (103), Expect = 4e-04, Method: Compositional matrix adjust.  
Identities = 33/85 (39%), Positives = 44/85 (52%), Gaps = 18/85 (21%)  
Frame = +1

Query 40 MAGIPGHPGHNGAPGRDGRDGTTPGEKGE-----KGDPLIGPKGDIG 81  
+ G G G G G +G DG+ G+KG+ KGD G IG KGDIG  
Sbjct 872875 LKGQKGDIGLKGKGETGDNGNDGSKGDKGDIGDNGLKGDKGDIGDDGLKGDKGDIGDKGDIG 873054

Query 82 ETGVPGAEGPRGFPGIQGRKGEPE 106  
ETG+ G +G G G++G KG+ G+  
Sbjct 873055 ETGLKGDKGDIGDNGLKGDKGDLD 873129

Score = 43.9 bits (102), Expect = 4e-04, Method: Compositional matrix adjust.  
Identities = 31/67 (46%), Positives = 38/67 (57%), Gaps = 0/67 (0%)  
Frame = +2

Query 40 MAGIPGHPGHNGAPGRDGRDGTTPGEKGEKGDPLIGPKGDIGETGVPGAEGPRGFPGIQG 99  
+ G G G G G G G G+KGEKGD G G KGDIG+ G G +G +G G +G  
Sbjct 337145 LKGEKGDIGDKGNKGEKGDIGDKGDKGEKGDIGDKGQKGDIGDKGQKGDIGDKGDKGDIGDKG 337324

Query 100 RKGEPE 106  
KG+ GE  
Sbjct 337325 EKGDAE 337345

Score = 43.9 bits (102), Expect = 5e-04, Method: Compositional matrix adjust.  
Identities = 31/66 (47%), Positives = 36/66 (55%), Gaps = 0/66 (0%)  
Frame = +1

Query 41 AGIPGHPGHNGAPGRDGRDGTTPGEKGEKGDPLIGPKGDIGETGVPGAEGPRGFPGIQGR 100  
G+ G G G G G G GEK+ GD GL G KGDIG+ G G G +G G G  
Sbjct 873967 TGLKGEKGDIGDKGEKGDGDKGEKGDIGDTGLKGEKGDIGDKGEKGDIGDKGEKGDIGD 874146

Query 101 KGEPE 106  
KGE G+  
Sbjct 874147 KGEKGD 874164

Score = 43.9 bits (102), Expect = 5e-04, Method: Compositional matrix adjust.  
Identities = 29/62 (47%), Positives = 39/62 (63%), Gaps = 0/62 (0%)  
Frame = +1

Query 45 GHPGHNGAPGRDGRDGTTPGEKGEKGDPLIGPKGDIGETGVPGAEGPRGFPGIQGRKGEPE 104  
G G G G G +G G+KG+ GD GL G KGDIG+TG+ G +G G G++G KG+  
Sbjct 873160 GDNGLKGDKGDIGDNGLKGDKGDLDLGLKGEKGDIGDTGLKGDKNIGDTGLKGDKGDLD 873339

Query 105 GE 106  
G+  
Sbjct 873340 GD 873345

Score = 43.5 bits (101), Expect = 6e-04, Method: Compositional matrix adjust.  
Identities = 31/71 (44%), Positives = 35/71 (49%), Gaps = 0/71 (0%)  
Frame = +2

Query 35 ACTGWMAGIPGHPGHNGAPGRDGRDGTTPGEKGEKGDPLIGPKGDIGETGVPGAEGPRGF 94  
+C G G PG+ G G G G G KGEKGD G G KGD G G G +G G  
Sbjct 274280 SCRDLTKGEKGDGPNKGNKGEKGDIGNKGNKGEKGDIGNKGEKGDGPNKGEKGEKGDIGN 274459

Query 95 PGIQGRKGEPE 105

G G KG+ G  
Sbjct 274460 KGDIGNKGDIG 274492

Score = 43.5 bits (101), Expect = 7e-04, Method: Compositional matrix adjust.  
Identities = 31/67 (46%), Positives = 36/67 (54%), Gaps = 0/67 (0%)  
Frame = +2

Query 40 MAGIPGHPGHNGAPGRDGRDGTTPGEKGEKGDPLIGPKGDIGETGVPGAEGPRGFPGIQQ 99  
+ G G G G G G G G+KGEKGD G G KGDIG+ G G G F G +G  
Sbjct 336713 LKGDKGEKGDIGDNGLKGDKGEKGDKGEKGDKGEKGDIGDKGNKGESGSAVFKGDKG 336892

Query 100 RKGEPGE 106  
KG+ GE  
Sbjct 336893 EKGDTGE 336913

Score = 43.1 bits (100), Expect = 7e-04, Method: Compositional matrix adjust.  
Identities = 30/61 (49%), Positives = 35/61 (57%), Gaps = 0/61 (0%)  
Frame = +2

Query 45 GHPGHNGAPGRDGRDGTTPGEKGEKGDPLIGPKGDIGETGVPGAEGPRGFPGIQQGRKGE 104  
G G G G G G G G+KGEKGD G KGDIGETG+ G +G +G G +G GE  
Sbjct 339410 GDVGEKGDVGDKGEKGDVGDKGEKGDISDKGEKGDIGETGLKGDKGEKGDIGDKGDIGET 339589

Query 105 G 105  
G  
Sbjct 339590 G 339592

Score = 43.1 bits (100), Expect = 7e-04, Method: Compositional matrix adjust.  
Identities = 32/65 (49%), Positives = 36/65 (55%), Gaps = 0/65 (0%)  
Frame = +1

Query 42 GIPGHPGHNGAPGRDGRDGTTPGEKGEKGDPLIGPKGDIGETGVPGAEGPRGFPGIQQGRK 101  
G G G G G G G G GEKG+KGD G G KGDIGE G G +G +G G +G  
Sbjct 272758 GEKGDMDIGLKGDKGDVGDKGEKGDKGDSDGEKGEKGDIGEKGDGDFGKGEKGNSEKGD 272937

Query 102 GEPGE 106  
GE GE  
Sbjct 272938 GEKGE 272952

Score = 43.1 bits (100), Expect = 8e-04, Method: Compositional matrix adjust.  
Identities = 31/65 (48%), Positives = 34/65 (52%), Gaps = 0/65 (0%)  
Frame = +1

Query 42 GIPGHPGHNGAPGRDGRDGTTPGEKGEKGDPLIGPKGDIGETGVPGAEGPRGFPGIQQGRK 101  
G G G G G G G G GEKGEKGD G G KG+ G+ G G G +G G G K  
Sbjct 276703 GDSGEKGEKGDIGLGEKGEKGDIGLGEKGEKGDVGDKGEKGETGDKGEKGETGDKGEKGDIGDK 276882

Query 102 GEPGE 106  
GE GE  
Sbjct 276883 GEKGE 276897

Score = 43.1 bits (100), Expect = 8e-04, Method: Compositional matrix adjust.  
Identities = 31/65 (48%), Positives = 35/65 (54%), Gaps = 0/65 (0%)

Frame = +1

Query 42 GIPGHPGHNGAPGRDGRDGTTPGEKGEKGDPLIGPKGDIGETGVPGAEGPRGFPGIQGRK 101  
G G G G G G G G G+KGEKG+ G G KGD+GE G G G +G G G K  
Sbjct 276811 GETGDKGEKGETGDKGEKGDLDGDKGEKGETGDKGEKGDLDGDKGEKGDLDGDKGEKGDIGDK 276990

Query 102 GEPGE 106  
GE GE  
Sbjct 276991 GEKGE 277005

Score = 43.1 bits (100), Expect = 8e-04, Method: Compositional matrix adjust.  
Identities = 29/65 (45%), Positives = 35/65 (54%), Gaps = 0/65 (0%)  
Frame = +1

Query 42 GIPGHPGHNGAPGRDGRDGTTPGEKGEKGDPLIGPKGDIGETGVPGAEGPRGFPGIQGRK 101  
G G G G G G G G G EKG+ GD GL G KGD+G+ G G +G G G +G  
Sbjct 272695 GDSGDKGEKGDGDKGEKGNIGDKGEKGMGDIGLKGDKGDVGDGKGEKGDGDSGDKGEKGDIGDI 272874

Query 102 GEPGE 106  
GE G+  
Sbjct 272875 GEKGD 272889

Score = 43.1 bits (100), Expect = 0.001, Method: Compositional matrix adjust.  
Identities = 28/64 (44%), Positives = 33/64 (52%), Gaps = 3/64 (5%)  
Frame = -3

Query 45 GHPGHNGAPGRDGRDGTTPGEKGEKGDPLIGPKGDIGETGVPGAEGPRGFPGIQGRKGEP 104  
G G NG+ G GR G KG+KGD G KG+ G G G++G G G G KGE  
Sbjct 679250 GIKGQNGSKGLKGR---IGNKQKGDSSNMKGETGSKGDIGSKGDIGSKGDIGSKGES 679080

Query 105 GEGA 108  
G A  
Sbjct 679079 GSTA 679068

Score = 42.7 bits (99), Expect = 0.001, Method: Compositional matrix adjust.  
Identities = 36/97 (37%), Positives = 47/97 (48%), Gaps = 5/97 (5%)  
Frame = +2

Query 40 MAGIPGHPGHNGAPGRDGRDGTTPGEKGEKGDPLIGPKGDIGETGVPGAEGPRGFPGIQG 99  
+ G G G G G G G G G+KGEKGD G G KGD GE G G +G +G G +G  
Sbjct 339593 LKGDKGDIGDKGDIGDKGDKGEKGDIGDKGDKGEKGDIGDKGDKGEKGDIGDKGDKGDKGDKG 339772

Query 100 RKGEPGEGAYVYRSAFSVGLETYVTIPNMPPIRFTKIF 136  
G+ GE ++F + T+ I P F+ I  
Sbjct 339773 DIGDKGEKGDVATSF---ISTF--IQTPGVFESSIV 339868

Score = 42.7 bits (99), Expect = 0.001, Method: Compositional matrix adjust.  
Identities = 31/65 (48%), Positives = 37/65 (57%), Gaps = 0/65 (0%)  
Frame = +1

Query 42 GIPGHPGHNGAPGRDGRDGTTPGEKGEKGDPLIGPKGDIGETGVPGAEGPRGFPGIQGRK 101  
G G G G G G G G G+KGEKGD G G KGDIG+TG+ G +G G G +G  
Sbjct 873934 GDKGEKGDIGDITGLKGEKGDIGDKGEKGDIGDKGEKGDIGDITGLKGEKGDIGDKGEKGDIGDI 874113

Query 102 GEPGE 106  
G+ GE  
Sbjct 874114 GDKGE 874128

Score = 42.7 bits (99), Expect = 0.001, Method: Compositional matrix adjust.  
Identities = 29/61 (48%), Positives = 35/61 (57%), Gaps = 0/61 (0%)  
Frame = +1

Query 45 GHPGHNGAPGRDGRDGTTPGEKGEKGDPLIGPKGDIGETGVPGAEGPRGFPGIQGRKGEP 104  
G G G G G G GEKG GD GL G KGDIG+ G+ G +G G G++G KG+  
Sbjct 276226 GEKGEKGLDGDKEKGDLEKGNIGDTGLKGDKGDIGDAGLKGDKDGLDAGLKGDKGDI 276405

Query 105 G 105  
G  
Sbjct 276406 G 276408

Score = 42.7 bits (99), Expect = 0.001, Method: Compositional matrix adjust.  
Identities = 33/77 (43%), Positives = 41/77 (53%), Gaps = 3/77 (4%)  
Frame = +2

Query 42 GIPGHPGHNGAPGRDGRDGTTPGE---KGEKGDPLIGPKGDIGETGVPGAEGPRGFPGIQ 98  
G G G NG G G G GE KG+KG+ G IG KGDIGETG+ G +G G G +  
Sbjct 336296 GEKGDIGENGLKGDKEKGDIGETGLKGDKEKGDIGEKGDIGETGLKGDKGLDGDKEKGD 336475

Query 99 GRKGEPGEGAYVYRSAF 115  
G G+ GE + +  
Sbjct 336476 GDLGDKGEKGDIGETGL 336526

Score = 42.4 bits (98), Expect = 0.001, Method: Compositional matrix adjust.  
Identities = 30/62 (48%), Positives = 34/62 (55%), Gaps = 0/62 (0%)  
Frame = +1

Query 45 GHPGHNGAPGRDGRDGTTPGEKGEKGDPLIGPKGDIGETGVPGAEGPRGFPGIQGRKGEP 104  
G G G G G G G+KGEKGD G G KGD+G+ G G G +G G G KGE  
Sbjct 874114 GDKGEKGDIGDKGEKGDIGDKGEKGDLDGKGEKGDLDGDKGDIGDKGEKGDLDGDKGEK 874293

Query 105 GE 106  
GE  
Sbjct 874294 GE 874299

Score = 42.4 bits (98), Expect = 0.001, Method: Compositional matrix adjust.  
Identities = 28/63 (44%), Positives = 36/63 (57%), Gaps = 0/63 (0%)  
Frame = +1

Query 44 PGHPGHNGAPGRDGRDGTTPGEKGEKGDPLIGPKGDIGETGVPGAEGPRGFPGIQGRKGE 103  
G G G G G G G+KGEKGD+ G G KGD+G+ G+ G +G G G +G KG+  
Sbjct 272665 KGDLDGDKGEKGDSDGDKGEKGDKEKGNIGDKGEKGDMDIGLKGDKGDVGDGDKGEKGD 272844

Query 104 PGE 106  
GE  
Sbjct 272845 SGE 272853

Score = 42.4 bits (98), Expect = 0.001, Method: Compositional matrix adjust.

Identities = 34/80 (43%), Positives = 37/80 (46%), Gaps = 12/80 (15%)  
Frame = +1

Query 42 GIPGHPGHNGAPGRDGRDGTTPGEKGEKGD-----PGLIGPKGDIGETGVPGA 89  
G+ G G G G G G G GEKGEKGD G G KGD+GE G G  
Sbjct 272785 GLKGDKGDVGDKGEKGDGDSGEKGEKGDIGEKGDFGNKGEKGNSEKGDLEKGEKGD 272964

Query 90 GPRGFPGIQGRKGEPEGAY 109  
G +G G G KGE GE Y  
Sbjct 272965 GDKGEKGDLEKGEKGERGY 273024

Score = 42.4 bits (98), Expect = 0.002, Method: Compositional matrix adjust.  
Identities = 26/55 (47%), Positives = 33/55 (60%), Gaps = 4/55 (7%)  
Frame = +2

Query 35 ACT----GWMAGIPGHPGHNGAPGRDGRDGTTPGEKGEKGD PGLIGPKGDIGETGV 85  
ACT G ++G PG G G G G DG+ G+KG+ G+ GL G KGDIG G+  
Sbjct 338918 ACTWILVGNLSGSPGQQGEKGEKGDIGNDGSKGDKGDLGNDGLKGEKGDIGVKGI 339082

Score = 42.4 bits (98), Expect = 0.002, Method: Compositional matrix adjust.  
Identities = 29/61 (48%), Positives = 35/61 (57%), Gaps = 0/61 (0%)  
Frame = +1

Query 45 GHPGHNGAPGRDGRDGTTPGEKGEKGD PGLIGPKGDIGETGVPGAEGPRGFPGIQGRKGE 104  
G G G G G G G +KGEKGD G G KGDIG+TG+ G +G G G +G G+  
Sbjct 873790 GDKGEKGDIGDKGEKGDIGDKGEKGDIGDKGEKGDIGDTGLKGEKGDLEKGEKGDIGDT 873969

Query 105 G 105  
G  
Sbjct 873970 G 873972

Score = 42.4 bits (98), Expect = 0.002, Method: Compositional matrix adjust.  
Identities = 30/70 (43%), Positives = 41/70 (59%), Gaps = 3/70 (4%)  
Frame = +1

Query 40 MAGIPGHPGHNGAPGRDGR---DGTPGEKGEKGD PGLIGPKGDIGETGVPGAEGPRGFPG 96  
+ G G G NG G G +G G+KG+ GD GL G KGDIG+ G+ G +G G G  
Sbjct 873064 LKGDKGDIGDNLKGDKGDLDGNDGLKGDKGDGDFDNLKGDKGDIGDNLKGDKGDLEKGD 873243

Query 97 IQGRKGEPEG 106  
++G KG+ G+  
Sbjct 873244 LKGEKGDIGD 873273

Score = 42.4 bits (98), Expect = 0.002, Method: Compositional matrix adjust.  
Identities = 30/71 (42%), Positives = 38/71 (54%), Gaps = 6/71 (8%)  
Frame = +2

Query 42 GIPGHPGHNGAPGRDGRDGTTPGE-----KGEKGD PGLIGPKGDIGETGVPGAEGPRGFPG 95  
G G GH G G DG G GE KG+KG+ G G KGD+G G+ G +G G  
Sbjct 287501 GEKGDKGHKGDFGNDGIKGDKGESGSAVFKGDKGEKGDKGQKGDLDGNDGIKGDKGESGSA 287680

Query 96 GIQGRKGEPEG 106  
++G KGE G+  
Sbjct 287681 VLKGDKGEKGD 287713

Score = 42.0 bits (97), Expect = 0.002, Method: Compositional matrix adjust.  
Identities = 28/62 (45%), Positives = 34/62 (55%), Gaps = 0/62 (0%)  
Frame = +1

Query 45 GHPGHNGAPGRDGRDGTTPGEKGEKGDPLIGPKGDIGETGVPGAEGPRGFPGIQGRKGEP 104  
G G G G G G G+KGEKG+ G G KGD+G+ G G G +G G G KGE  
Sbjct 276766 GEKGEKGDVGDKGEKGETGDKGEKGETGDKGEKGDLDKGEKGETGDKGEKGDLDKGEKGEK 276945

Query 105 GE 106  
G+  
Sbjct 276946 GD 276951

Score = 42.0 bits (97), Expect = 0.002, Method: Compositional matrix adjust.  
Identities = 31/65 (48%), Positives = 36/65 (55%), Gaps = 0/65 (0%)  
Frame = +2

Query 42 GIPGHPGHNGAPGRDGRDGTTPGEKGEKGDPLIGPKGDIGETGVPGAEGPRGFPGIQGRK 101  
G G G G G G G KG+KG+ G IG KGDIGETG+ G +G G G G K  
Sbjct 339464 GDKGEKGDIDSKGEKGDIGETGLKGDKGEKGDIGDKGDIGETGLKGDKGDIGDKGDIGDK 339643

Query 102 GEPGE 106  
G+ GE  
Sbjct 339644 GDKGE 339658

Score = 42.0 bits (97), Expect = 0.002, Method: Compositional matrix adjust.  
Identities = 31/65 (48%), Positives = 35/65 (54%), Gaps = 0/65 (0%)  
Frame = +1

Query 42 GIPGHPGHNGAPGRDGRDGTTPGEKGEKGDPLIGPKGDIGETGVPGAEGPRGFPGIQGRK 101  
G G G G G G G G+KGEKGD G G KGDIG+ G G G +G G G K  
Sbjct 874024 GDKGEKGDIDGDTGLKGEKGDIGDKGEKGDIGDKGEKGDIGDKGEKGDIGDKGEKGDLDGDK 874203

Query 102 GEPGE 106  
GE G+  
Sbjct 874204 GEKGD 874218

Score = 42.0 bits (97), Expect = 0.002, Method: Compositional matrix adjust.  
Identities = 30/62 (48%), Positives = 38/62 (61%), Gaps = 0/62 (0%)  
Frame = +2

Query 45 GHPGHNGAPGRDGRDGTTPGEKGEKGDPLIGPKGDIGETGVPGAEGPRGFPGIQGRKGEP 104  
G G G G G G G+KG+KGD G G KGDIGETG+ G +G +G G +G KG+  
Sbjct 336404 GEKGDIGETGLKGDKGDLDGDKGDKGDLDGDKGEKGDIGETGLKGDKGEKGDIGDKGEKGD 336583

Query 105 GE 106  
G+  
Sbjct 336584 GD 336589

Score = 42.0 bits (97), Expect = 0.002, Method: Compositional matrix adjust.  
Identities = 28/66 (42%), Positives = 36/66 (55%), Gaps = 0/66 (0%)  
Frame = +2



Query 40 MAGIPGHPGHNGAPGRDGRDGTTPGEKGEKGDPLIGPKGDIGETGVPGAEGPRGFPGIQQ 99  
+ G G G G G G DG G KG+ G+ GL G KGD G G+ G +G G G++G  
Sbjct 275135 LKGQKGDLDGDKGDKGDLGNDGLKGNKGDLDGNDGLKGEKGDGFGNDGLKGEKGDGFGNDGLKG 275314

Query 100 RKGEPG 105  
KG+ G  
Sbjct 275315 EKGDLG 275332

Score = 42.0 bits (97), Expect = 0.002, Method: Compositional matrix adjust.  
Identities = 30/66 (45%), Positives = 38/66 (58%), Gaps = 0/66 (0%)  
Frame = +1

Query 40 MAGIPGHPGHNGAPGRDGRDGTTPGEKGEKGDPLIGPKGDIGETGVPGAEGPRGFPGIQQ 99  
+ G G+ G G G G G G+KGEKGD G G KGDIG+TG+ G +G G G +G  
Sbjct 873280 LKGDKGNIGDTGLKGDGDLGNDIGDKGEKGDIGDKGEKGDIGDTGLKGEKGDIGDKGEK 873459

Query 100 RKGEPG 105  
G+ G  
Sbjct 873460 DIGDTG 873477

Score = 42.0 bits (97), Expect = 0.002, Method: Compositional matrix adjust.  
Identities = 30/65 (46%), Positives = 34/65 (52%), Gaps = 0/65 (0%)  
Frame = +1

Query 42 GIPGHPGHNGAPGRDGRDGTTPGEKGEKGDPLIGPKGDIGETGVPGAEGPRGFPGIQQGRK 101  
G G G G G G G G GEKGE GD G G GD GE G G +G +G G +G K  
Sbjct 276955 GEKGEKGDIGDKGEKGETGDKGEKGETGDKGEKGETGDKGEKGDVGDGKGEKGETGDKGEK 277134

Query 102 GEPGE 106  
GE G+  
Sbjct 277135 GETGD 277149

Score = 42.0 bits (97), Expect = 0.002, Method: Compositional matrix adjust.  
Identities = 31/65 (48%), Positives = 35/65 (54%), Gaps = 0/65 (0%)  
Frame = +2

Query 42 GIPGHPGHNGAPGRDGRDGTTPGEKGEKGDPLIGPKGDIGETGVPGAEGPRGFPGIQQGRK 101  
G G G G G G G G GE G KGD G IG KGDIG+ G G +G +G G G K  
Sbjct 339518 GETGLKGDGKGEKGDIGDKGDIGETGLKGDGKGDIGDKGDIGDKGDGKGEKGDGKGEKGDIGDK 339697

Query 102 GEPGE 106  
GE G+  
Sbjct 339698 GEKGD 339712

Score = 41.6 bits (96), Expect = 0.002, Method: Compositional matrix adjust.  
Identities = 38/103 (37%), Positives = 48/103 (47%), Gaps = 13/103 (13%)  
Frame = +2

Query 41 AGIPGHPGHNGAPGRDGRDGTTPGEKGEKGD---PGLIGPKGDIGETGVPGAEGPRGFPGI 97  
G G G G G G G G GEKGEKGD G IG KGDIG G G +G +G G  
Sbjct 274361 KGNKGEKGDIGNKGEKGDGPNKGEKGEKGDIGNKGDIGNKGDIGNKGDIGNKGEKGDLDGN 274540

Query 98 QGRKGEPEGE-GAYVYRSFAFSVGL-----ETYVTIPNMPI 130  
+G KG+ G+ G + VG+ + Y+ I N +

Sbjct 274541 KGEKGDIGDKGVNGSQILTGVGIPSDNLGNVGDIIYIDITNNDL 274669

Score = 41.6 bits (96), Expect = 0.003, Method: Compositional matrix adjust.  
Identities = 26/62 (42%), Positives = 39/62 (63%), Gaps = 0/62 (0%)  
Frame = +2

Query 42 GIPGHPGHNGAPGRDGRDGTTPGEKGEKGDPLIGPKGDIGETGVPGAEGPRGFPGIQGRK 101  
G G+ G++G G+ G G G+KG+ G+ GL G KGD+G G+ G +G G G++G K  
Sbjct 275105 GDKGNIGNDGLKQKQKGLDGLDKGDKGDLGNDGLKGNKGLDGLNDGLKGEKGDGFGNDGLKGEK 275284

Query 102 GE 103  
G+  
Sbjct 275285 GD 275290

Score = 41.2 bits (95), Expect = 0.003, Method: Compositional matrix adjust.  
Identities = 30/65 (46%), Positives = 34/65 (52%), Gaps = 0/65 (0%)  
Frame = +1

Query 42 GIPGHPGHNGAPGRDGRDGTTPGEKGEKGDPLIGPKGDIGETGVPGAEGPRGFPGIQGRK 101  
G G G G G G G GEKGEKGD G G KG+ G+ G G G +G G G K  
Sbjct 276892 GETGDKGEKGDLEKGEKGDLEKGEKGDIGDKGEKGETGDKGEKGETGDKGEKGETGDK 277071

Query 102 GEPGE 106  
GE G+  
Sbjct 277072 GEKGD 277086

Score = 41.2 bits (95), Expect = 0.003, Method: Compositional matrix adjust.  
Identities = 30/69 (43%), Positives = 42/69 (61%), Gaps = 3/69 (4%)  
Frame = +1

Query 41 AGIPGHPGHNGAPGRDGRDGTTPGEKGE---KGDPLIGPKGDIGETGVPGAEGPRGFPGI 97  
AG+ G G G G G G GEK+ KG+ G +G KG+IG+TG+ G +G G G+  
Sbjct 276169 AGLKGDKGDIGDKGEKGNLGEKGEKGDLDGDKGEKGDLEKGNIGDTGLKGDIGDAGL 276348

Query 98 QGRKGEPEGE 106  
+G KG+ G+  
Sbjct 276349 KGDKGDLGD 276375

Score = 41.2 bits (95), Expect = 0.003, Method: Compositional matrix adjust.  
Identities = 29/62 (47%), Positives = 34/62 (55%), Gaps = 0/62 (0%)  
Frame = +1

Query 45 GHPGHNGAPGRDGRDGTTPGEKGEKGDPLIGPKGDIGETGVPGAEGPRGFPGIQGRKGEPE 104  
G G G G G G G+KGEKGD G G KGD+G+ G G G +G G G KGE  
Sbjct 874087 GDKGEKGDIGDKGEKGDIGDKGEKGDIGDKGEKGDLDGDKGEKGDLDGDKGDIGDKGEK 874266

Query 105 GE 106  
G+  
Sbjct 874267 GD 874272

Score = 41.2 bits (95), Expect = 0.003, Method: Compositional matrix adjust.  
Identities = 30/65 (46%), Positives = 37/65 (57%), Gaps = 0/65 (0%)  
Frame = +2

Query 42 GIPGHPGHNGAPGRDGRDGTTPGEKGEKGDPLIGPKGDIGETGVPGAEGPRGFPGIQGRK 101  
G G G G G G G G G+KGEKGD G G KGD+G+TG+ G +G G G +G  
Sbjct 337331 GDAGEKGEKGDLDGEKGDIGDKGEKGDIGNKGEKGDLDGDTGLKGDKGDLDGDKGDGDL 337510

Query 102 GEPGE 106  
G+ GE  
Sbjct 337511 GDKGE 337525

Score = 41.2 bits (95), Expect = 0.003, Method: Compositional matrix adjust.  
Identities = 31/65 (48%), Positives = 35/65 (54%), Gaps = 0/65 (0%)  
Frame = +2

Query 42 GIPGHPGHNGAPGRDGRDGTTPGEKGEKGDPLIGPKGDIGETGVPGAEGPRGFPGIQGRK 101  
G G G G G G G G G+KGEKGD G G KGD+GE G G G +G G G K  
Sbjct 337250 GQKGDIGDKGQKGDKGDIGDKGEKGDAGEKGEKGDLDGEKGDIGDKGEKGDIGNK 337429

Query 102 GEPGE 106  
GE G+  
Sbjct 337430 GEKGD 337444

Score = 41.2 bits (95), Expect = 0.003, Method: Compositional matrix adjust.  
Identities = 30/67 (45%), Positives = 36/67 (54%), Gaps = 0/67 (0%)  
Frame = +2

Query 40 MAGIPGHPGHNGAPGRDGRDGTTPGEKGEKGDPLIGPKGDIGETGVPGAEGPRGFPGIQG 99  
+ G G G G G G G G G+KG+ GD G IG KGD GE G G +G G G +G  
Sbjct 339530 LKGDKGEKGDIGDKGDIGETGLKGDKGDIGDKGDIGDKGDKGEKGDIGDKGEKGD 339709

Query 100 RKGEPGE 106  
KGE G+  
Sbjct 339710 DKGEKGD 339730

Score = 41.2 bits (95), Expect = 0.003, Method: Compositional matrix adjust.  
Identities = 31/72 (43%), Positives = 41/72 (57%), Gaps = 1/72 (1%)  
Frame = +2

Query 42 GIPGHPGHNGAPGRDGRDGTTPGEKGEKGDPLIGPKGDIGETGVPGAEGPRGFPGIQGRK 101  
G+ G G G G +G G GEKGD+ GD GL G KG+ G+ G G +G +G G G K  
Sbjct 336665 GLKGDKGEKGDIGDNLKGDKGEKGDIGDNLKGDKGEKGDKGEKGDIGDK 336844

Query 102 GEPGE-GAYVYR 112  
G GE G+ V++  
Sbjct 336845 GNKGESGSAVFK 336880

Score = 41.2 bits (95), Expect = 0.004, Method: Compositional matrix adjust.  
Identities = 27/74 (36%), Positives = 35/74 (47%), Gaps = 1/74 (1%)  
Frame = -3

Query 42 GIPGHPGHNGAPGRDGRDGTTPGEKGEKGDPLIGPKGDIGETGVPGAEGPRGFPGIQGRK 101  
G G G G G G G+ G+ G KGD G G G E G G +G +G G +G K  
Sbjct 679187 GDSGSSNMKGETGSKGDIGSKGDIGSKGDIGSKGESGSTAEKGDKNNDGNKNDGNKGD 679008

Query 102 GEPGEGAYVYRSAF 115

G G+G + YR +  
Sbjct 679007 GMQGKG-FKYRCNY 678969

Score = 41.2 bits (95), Expect = 0.004, Method: Compositional matrix adjust.  
Identities = 27/64 (42%), Positives = 38/64 (59%), Gaps = 0/64 (0%)  
Frame = +1

Query 43 IPGHPGHNGAPGRDGRDGTTPGEKGEKGDPLIGPKGDIGETGVPGAEGPRGFPGIQRKG 102  
+ G G G G G G G+KG+ GD GL G KGD+G+ G+ G +G G G++G KG  
Sbjct 873010 LKGDKGDIGDKGDIGETGLKGDKGDIGDNGLKGDKGDLDNGLKGDKGDGDFDNGDKGDKG 873189

Query 103 EPGE 106  
+ G+  
Sbjct 873190 DIGD 873201

Score = 40.8 bits (94), Expect = 0.004, Method: Compositional matrix adjust.  
Identities = 32/70 (46%), Positives = 40/70 (57%), Gaps = 3/70 (4%)  
Frame = +1

Query 40 MAGIPGHPGHNGAPGRDGRDGTTPGEKGEK---GDPGLIGPKGDIGETGVPGAEGPRGFPG 96  
+ G G G NG G G G G KGEK GD GL G KG+IG+TG+ G +G G G  
Sbjct 873172 LKGDKGDIGDNGLKGDKGDLDLGLKGEKGDIGDTGLKGDKNIGDTGLKGDKGDLDIG 873351

Query 97 IQGRKGEPE 106  
+G KG+ G+  
Sbjct 873352 DKGEKGDIGD 873381

Score = 40.8 bits (94), Expect = 0.004, Method: Compositional matrix adjust.  
Identities = 31/74 (42%), Positives = 38/74 (51%), Gaps = 0/74 (0%)  
Frame = +1

Query 42 GIPGHPGHNGAPGRDGRDGTTPGEKGEKGDPLIGPKGDIGETGVPGAEGPRGFPGIQRK 101  
G G G G G G G G KGEKGD G G KGDIG+TG+ G +G G G +G  
Sbjct 873844 GDKGEKGDIGDKGEKGDIGDTGLKGEKGDLDGDKGEKGDIGDTGLKGEKGDIGDKGEKGD 874023

Query 102 GEPGEGAYVYRSAF 115  
G+ GE + +  
Sbjct 874024 GDKGEKGDIGDTGL 874065

Score = 40.8 bits (94), Expect = 0.005, Method: Compositional matrix adjust.  
Identities = 30/71 (42%), Positives = 37/71 (52%), Gaps = 6/71 (8%)  
Frame = +1

Query 42 GIPGHPGHNGAPGRDGRDGTTPGE-----KGEKGDPLIGPKGDIGETGVPGAEGPRGFPG 95  
G G G G G DG G GE KG+KGD G+ G KGD+G G+ G +G G  
Sbjct 271336 GDVGEKGDKGDLDGNDGDKGDKGESGSAVFKGDKGDVGIKGDKGDLDGNDGIKGDKGESGSA 271515

Query 96 GIQRKGEPE 106  
+G KG+ GE  
Sbjct 271516 VFKGDKGDVGE 271548

Score = 40.8 bits (94), Expect = 0.005, Method: Compositional matrix adjust.  
Identities = 30/65 (46%), Positives = 35/65 (54%), Gaps = 0/65 (0%)

Frame = +1

Query 42 GIPGHPGHNGAPGRDGRDGTTPGEKGEKGDPLIGPKGDIGETGVPGAEGPRGFPGIQGRK 101  
G G G G G G G G+KGEKGD G G KGDIG+ G G G +G G G K  
Sbjct 874051 GDTGLKGEKGDIGDKGEKGDIGDKGEKGDIGDKGEKGDIGDKGEKGDIGDKGEKGDIGDKGEKGDIGDK 874230

Query 102 GEPGE 106  
G+ G+  
Sbjct 874231 GDKGD 874245

Score = 40.8 bits (94), Expect = 0.005, Method: Compositional matrix adjust.  
Identities = 29/62 (47%), Positives = 36/62 (58%), Gaps = 0/62 (0%)  
Frame = +2

Query 45 GHPGHNGAPGRDGRDGTTPGEKGEKGDPLIGPKGDIGETGVPGAEGPRGFPGIQGRKGE 104  
G G G G G G G GEK+ GD GL G KGD G+ G+ G +G G G++G KGE  
Sbjct 336512 GETGLKGDKGEKGDIGDKGEKGDIFGDDGLKGEKGDIFGDDGLKGDKGDIGDNLKGDKGEK 336691

Query 105 GE 106  
G+  
Sbjct 336692 GD 336697

Score = 40.8 bits (94), Expect = 0.005, Method: Compositional matrix adjust.  
Identities = 22/60 (37%), Positives = 31/60 (52%), Gaps = 0/60 (0%)  
Frame = -3

Query 41 AGIPGHPGHNGAPGRDGRDGTTPGEKGEKGDPLIGPKGDIGETGVPGAEGPRGFPGIQGR 100  
+ + G G G G G G G+ G+ G KG+ G KGD G G G +G +G G+QG+  
Sbjct 679172 SNMKGETGSKGDIGSKGDIGSKGDIGSKGESGSTAEKGDKNNDGNKNDGNKGDGMQK 678993

Score = 40.8 bits (94), Expect = 0.005, Method: Compositional matrix adjust.  
Identities = 28/65 (43%), Positives = 37/65 (57%), Gaps = 0/65 (0%)  
Frame = +2

Query 42 GIPGHPGHNGAPGRDGRDGTTPGEKGEKGDPLIGPKGDIGETGVPGAEGPRGFPGIQGRK 101  
G G G G G G G G+KG+ G+ GL G KGDIG+ G G +G +G G +G K  
Sbjct 339500 GEKGDIGETGLKGDKGEKGDIGDKGDIGETGLKGDKGDIGDKGDIGDKGDIGDKGEKGDKGEK 339679

Query 102 GEPGE 106  
G+ G+  
Sbjct 339680 GDIGD 339694

Score = 40.8 bits (94), Expect = 0.005, Method: Compositional matrix adjust.  
Identities = 30/66 (45%), Positives = 35/66 (53%), Gaps = 0/66 (0%)  
Frame = +1

Query 41 AGIPGHPGHNGAPGRDGRDGTTPGEKGEKGDPLIGPKGDIGETGVPGAEGPRGFPGIQGR 100  
+G G G G G G G G GEKGD G G KGDIG+ G G G +G G +G  
Sbjct 272845 SGEKGEKGDIGEKGDIFGNKGEKGNSEKGDIGDKGEKGDIGDKGEKGDIGDKGEKGERGY 273024

Query 101 KGEPEGE 106  
KGE G+  
Sbjct 273025 KGEKGD 273042

Score = 40.8 bits (94), Expect = 0.005, Method: Compositional matrix adjust.  
Identities = 27/62 (44%), Positives = 37/62 (60%), Gaps = 0/62 (0%)  
Frame = +1

Query 45 GHPGHNGAPGRDGRDGTPEKGEKGDPLIGPKGDIGETGVPGAEGPRGFPGIQGRKGEP 104  
G G G G G +G G+KG+ GD GL G KGD G+ G+ G +G G G++G KG+  
Sbjct 873052 GETGLKGDKGDIGDNLKGDKGLDNLKGDKGDGDFDNLKGDKGDIGDNLKGDKGD 873231

Query 105 GE 106  
G+  
Sbjct 873232 GD 873237

Score = 40.4 bits (93), Expect = 0.005, Method: Compositional matrix adjust.  
Identities = 30/65 (46%), Positives = 34/65 (52%), Gaps = 0/65 (0%)  
Frame = +1

Query 42 GIPGHPGHNGAPGRDGRDGTPEKGEKGDPLIGPKGDIGETGVPGAEGPRGFPGIQGRK 101  
G G G G G G G GEKGE GD G G GD GE G G +G +G G +G K  
Sbjct 276928 GEKGEKGLGEKGEKGDIGDKGEKGETGDKGEKGETGDKGEKGETGDKGEKGDVGDKGEK 277107

Query 102 GEPGE 106  
GE G+  
Sbjct 277108 GETGD 277122

Score = 40.4 bits (93), Expect = 0.006, Method: Compositional matrix adjust.  
Identities = 30/65 (46%), Positives = 35/65 (54%), Gaps = 0/65 (0%)  
Frame = +1

Query 42 GIPGHPGHNGAPGRDGRDGTPEKGEKGDPLIGPKGDIGETGVPGAEGPRGFPGIQGRK 101  
G G G G G G G G+KG+ GD GL G KGDIG+ G G G +G G G K  
Sbjct 873673 GEKGDIGDKGEKGDIGDTGLKGDKGLDGLTGLKGDKGDIGDKGEKGDIGDKGEKGDIGDK 873852

Query 102 GEPGE 106  
GE G+  
Sbjct 873853 GEKGD 873867

Score = 40.4 bits (93), Expect = 0.006, Method: Compositional matrix adjust.  
Identities = 29/70 (41%), Positives = 40/70 (57%), Gaps = 3/70 (4%)  
Frame = +1

Query 40 MAGIPGHPGHNGAPGRDGR---DGTPPEKGEKGDPLIGPKGDIGETGVPGAEGPRGFPG 96  
+ G G G NG G G +G G+KG+ GD GL G KGD+G+ G+ G +G G G  
Sbjct 873100 LKGDKGLDNLKGDKGDGDFDNLKGDKGDIGDNLKGDKGLDGLGLKGEKGDIGDTG 873279

Query 97 IQGRKGEPGE 106  
++G KG G+  
Sbjct 873280 LKGDKNIGD 873309

Score = 40.4 bits (93), Expect = 0.007, Method: Compositional matrix adjust.  
Identities = 28/73 (38%), Positives = 33/73 (45%), Gaps = 6/73 (8%)  
Frame = -3

Query 40 MAGIPGHPGHNGAPGRDGRDGTPE-----KGEKGDPLIGPKGDIGETGVPGAEGPRG 93

G G PG NG G G G G+ KG+KGD G+ G G G G G +G +G  
 Sbjct 679364 CKGDKGDPGKNGLKGDPLKQKGDGSTMKGDKDIGIKGQNGSKGLKGRIGNKGQKG 679185  
 Query 94 FPGIQGRKGEPE 106  
 G KGE G  
 Sbjct 679184 DSGSSNMKGETGS 679146

Score = 40.0 bits (92), Expect = 0.007, Method: Compositional matrix adjust.  
 Identities = 31/65 (48%), Positives = 35/65 (54%), Gaps = 0/65 (0%)  
 Frame = +2

Query 42 GIPGHPGHNGAPGRDGRDGTPEKEKGDPLIGPKGDIGETGVPGAEGPRGFPGIQGRK 101  
 G G G G G G G GEKG+ GD GL G KGD+G+ G G G +G G G K  
 Sbjct 337367 GEKGDKGDIGDKGEKGDIGNKGEKGDLDGTGLKGDKGLDGDGDKGDLGDKGEKGDLDGK 337546  
 Query 102 GEPGE 106  
 GE GE  
 Sbjct 337547 GEKGE 337561

Score = 40.0 bits (92), Expect = 0.007, Method: Compositional matrix adjust.  
 Identities = 34/75 (45%), Positives = 38/75 (51%), Gaps = 9/75 (12%)  
 Frame = +2

Query 41 AGIPGHPGHNGAPGRDGRDGTPEK-----EKGD-----GLIGPKGDIGETGVPGAEGP 91  
 G PG+ G+ G G G G GEKG EKGD G G KGDIG G G +G  
 Sbjct 274307 KGDGPNKGNKGEKGDIGNKGNKGEKGDIGNKGEKGDGPNKGEKGEKGDIGNKGDIGNKGD 274486  
 Query 92 RGFPGIQGRKGEPE 106  
 G G G KGE G+  
 Sbjct 274487 IGNKGDIGNKGEKGD 274531

Score = 40.0 bits (92), Expect = 0.007, Method: Compositional matrix adjust.  
 Identities = 32/76 (42%), Positives = 41/76 (54%), Gaps = 0/76 (0%)  
 Frame = +1

Query 42 GIPGHPGHNGAPGRDGRDGTPEKEKGDPLIGPKGDIGETGVPGAEGPRGFPGIQGRK 101  
 GI G G +G+ G G GEKG+KGD G G KGD GE+G +G +G G +G K  
 Sbjct 271093 GIKGDKGESGSAVFKGDKGDVGEKGDKGLDNDGIKGDKGESGSAVFKGDKGDIGEKGDK 271272  
 Query 102 GEPGEGAYVYRSAFSV 117  
 G+ GE S +V  
 Sbjct 271273 GDIGEKGDKGESGSAV 271320

Score = 40.0 bits (92), Expect = 0.008, Method: Compositional matrix adjust.  
 Identities = 28/64 (44%), Positives = 37/64 (58%), Gaps = 0/64 (0%)  
 Frame = +1

Query 42 GIPGHPGHNGAPGRDGRDGTPEKEKGDPLIGPKGDIGETGVPGAEGPRGFPGIQGRK 101  
 G G G G G G G G+KG+ GD GL G KGD+G+ G+ G +G G G++G K  
 Sbjct 276253 GDKGEKGLDGEKGNIGDTGLKGDKGDIGDAGLKGDKGLDAGLKGDKGDIGNDGLKGEK 276432  
 Query 102 GEPG 105  
 G+ G  
 Sbjct 276433 GDLG 276444

Score = 40.0 bits (92), Expect = 0.008, Method: Compositional matrix adjust.  
Identities = 28/64 (44%), Positives = 38/64 (59%), Gaps = 0/64 (0%)  
Frame = +2

Query 42 GIPGHPGHNGAPGRDGRDGTTPGEKGEKGDPLIGPKGDIGETGVPGAEGPRGFPGIQGRK 101  
GI G G +G+ G G G+KG+KGD G G KGD GE+G +G +G G +G+K  
Sbjct 287546 GIKGDKGESGSAVFKGDKGEKGDKGQKGLGNDGIKGDKGESGSAVLKGDKGEKGDKGQK 287725

Query 102 GEPG 105  
G+ G  
Sbjct 287726 GDLG 287737

Score = 40.0 bits (92), Expect = 0.008, Method: Compositional matrix adjust.  
Identities = 30/74 (41%), Positives = 36/74 (49%), Gaps = 0/74 (0%)  
Frame = +1

Query 42 GIPGHPGHNGAPGRDGRDGTTPGEKGEKGDPLIGPKGDIGETGVPGAEGPRGFPGIQGRK 101  
G G G G G G G G+KGEKGD G G KGDIG+ G G G G G +G  
Sbjct 873754 GDTGLKGDKGDIGDKGEKGDIGDKGEKGDIGDKGEKGDIGDKGEKGDIGDTGLKGEKGD 873933

Query 102 GEPGEGAYVYRSFAF 115  
G+ GE + +  
Sbjct 873934 GDKGEKGDIGDTGL 873975

Score = 40.0 bits (92), Expect = 0.008, Method: Compositional matrix adjust.  
Identities = 26/56 (46%), Positives = 31/56 (55%), Gaps = 0/56 (0%)  
Frame = +2

Query 45 GHPGHNGAPGRDGRDGTTPGEKGEKGDPLIGPKGDIGETGVPGAEGPRGFPGIQGR 100  
G G G G G DG GEK+ GD GL G KGD+G G+ G +G G G+ G  
Sbjct 275564 GDDGLKGEKGDIGDDGLKGEKGDIGDDGLKGEKGDIGDDGLKGEKGDIGDDGLNGE 275731

Score = 40.0 bits (92), Expect = 0.008, Method: Compositional matrix adjust.  
Identities = 28/64 (44%), Positives = 38/64 (59%), Gaps = 0/64 (0%)  
Frame = +2

Query 42 GIPGHPGHNGAPGRDGRDGTTPGEKGEKGDPLIGPKGDIGETGVPGAEGPRGFPGIQGRK 101  
GI G G +G+ G G G+KG+KGD G G KGD GE+G +G +G G +G+K  
Sbjct 287645 GIKGDKGESGSAVLKGDKGEKGDKGQKGLGNDGIKGDKGESGSAVFKGDKGEKGDKGQK 287824

Query 102 GEPG 105  
G+ G  
Sbjct 287825 GDLG 287836

Score = 40.0 bits (92), Expect = 0.008, Method: Compositional matrix adjust.  
Identities = 31/65 (48%), Positives = 35/65 (54%), Gaps = 0/65 (0%)  
Frame = +1

Query 42 GIPGHPGHNGAPGRDGRDGTTPGEKGEKGDPLIGPKGDIGETGVPGAEGPRGFPGIQGRK 101  
G G+ G G G G G GEKG GD GL G KGDIG+ G G G +G G G K  
Sbjct 276082 GEKGNLGDAGLKGDKGDIGDKGEKGNLGDAGLKGDKGDIGDKGEKGNLGEKGEKGDIGDK 276261



Query 102 GEPGE 106  
GE G+  
Sbjct 276262 GEKGD 276276

Score = 40.0 bits (92), Expect = 0.008, Method: Compositional matrix adjust.  
Identities = 28/74 (38%), Positives = 40/74 (54%), Gaps = 1/74 (1%)  
Frame = +2

Query 40 MAGIPGHPGHNGAPGRDGRDGTTPGEKGEKGDPLIGPKGDIGETGVPGAEGPRGFPGIQG 99  
+ G G G+ G G+ G G G KG+KG+ G KGD+G G G +G G +G  
Sbjct 287261 LEKEKGDKGYKGDKGQKGLDNDGVKGDKEKAKEKQKGLDNDGTGKDKGESGSAVFKG 287440

Query 100 RKGEPGE-GAYVYR 112  
KG+ GE G+ V++  
Sbjct 287441 DKGDKGESGSAVFK 287482

Score = 40.0 bits (92), Expect = 0.009, Method: Compositional matrix adjust.  
Identities = 31/74 (42%), Positives = 38/74 (51%), Gaps = 9/74 (12%)  
Frame = +1

Query 42 GIPGHPGHNGAPGRDGRDGTTPGE-----KGEKGDPLIGPKGDIGETGVPGAEGPRG-- 93  
G G G G G DG G GE KG+KGD G G KGD+G G+ G +G G  
Sbjct 271732 GDVGEKGDKGLDNDGDKGDKGESGSAVFKGDKGDVGEKGDGLDNDGIKGDKGESGSS 271911

Query 94 -FPGIQGRKGEPE 106  
F G +G KG+ G+  
Sbjct 271912 VFKGDKEKGDKGD 271953

Score = 40.0 bits (92), Expect = 0.009, Method: Compositional matrix adjust.  
Identities = 29/65 (45%), Positives = 34/65 (52%), Gaps = 0/65 (0%)  
Frame = +1

Query 42 GIPGHPGHNGAPGRDGRDGTTPGEKGEKGDPLIGPKGDIGETGVPGAEGPRGFPGIQGRK 101  
G G G G G G G GEKG+ GD GL G KGD+G+ G G G G +G  
Sbjct 873817 GDKGEKGDIGDKGEKGDIGDKGEKGDIGDTGLKGEKGDLDGKGEKGDIGDTGLKGEKGD 873996

Query 102 GEPGE 106  
G+ GE  
Sbjct 873997 GDKGE 874011

Score = 40.0 bits (92), Expect = 0.009, Method: Compositional matrix adjust.  
Identities = 30/65 (46%), Positives = 34/65 (52%), Gaps = 0/65 (0%)  
Frame = +1

Query 42 GIPGHPGHNGAPGRDGRDGTTPGEKGEKGDPLIGPKGDIGETGVPGAEGPRGFPGIQGRK 101  
G G G G G G G GEKGE GD G G GD GE G G +G +G G +G K  
Sbjct 276766 GEKGEKGDVGDGKGEKGETGDKGEKGETGDKGEKGDLDGKGEKGETGDKGEKGDLDGKGEK 276945

Query 102 GEPGE 106  
G+ GE  
Sbjct 276946 GDLGE 276960

Score = 40.0 bits (92), Expect = 0.009, Method: Compositional matrix adjust.



Query 105 GE 106  
G+  
Sbjct 276973 GD 276978

Score = 39.7 bits (91), Expect = 0.012, Method: Compositional matrix adjust.  
Identities = 30/74 (41%), Positives = 38/74 (51%), Gaps = 9/74 (12%)  
Frame = +2

Query 42 GIPGHPGHNGAPGRDGRDGTTPGE-----KGEKGDPLIGPKGDIGETGVPGAEGPRG-- 93  
G G G G G DG G GE KG+KG+ G G KGD+G G+ G +G G  
Sbjct 288122 GEKGDKGQKGDLDGNDGLKGDKGESGSAVFKGDKGEKGDKGQKGDLDGNDGIKGDKGESGSA 288301

Query 94 -FPGIQGRKGEPE 106  
F G +G KG+ G+  
Sbjct 288302 VFKGDKGEKGDKGQ 288343

Score = 39.7 bits (91), Expect = 0.012, Method: Compositional matrix adjust.  
Identities = 30/65 (46%), Positives = 36/65 (55%), Gaps = 3/65 (5%)  
Frame = +1

Query 45 GHPGHNGAPGRDGRDGTTPGE---KGEKGDPLIGPKGDIGETGVPGAEGPRGFPGIQGRK 101  
G G G G DG G G+ KGEKGD G GPKGD G G G +G G G++G K  
Sbjct 275947 GEKGDKGGIGNDGLKGDKGDIGDKGEKGDIGDAGPKGDEGNIGDKGEKGNLDAGLKGDK 276126

Query 102 GEPGE 106  
G+ G+  
Sbjct 276127 GDIGD 276141

Score = 39.7 bits (91), Expect = 0.012, Method: Compositional matrix adjust.  
Identities = 28/64 (44%), Positives = 38/64 (59%), Gaps = 0/64 (0%)  
Frame = +2

Query 42 GIPGHPGHNGAPGRDGRDGTTPGEKGEKGDPLIGPKGDIGETGVPGAEGPRGFPGIQGRK 101  
GI G G +G+ G G G+KG+KGD G G KGD GE+G +G +G G +G+K  
Sbjct 287969 GIKGDKGESGSAVFKGDKGEKGDKGQKGDLDGNDGLKGDKGESGSAVFKGDKGEKGDKGQK 288148

Query 102 GEPG 105  
G+ G  
Sbjct 288149 GDLG 288160

Score = 39.7 bits (91), Expect = 0.013, Method: Compositional matrix adjust.  
Identities = 30/71 (42%), Positives = 40/71 (56%), Gaps = 6/71 (8%)  
Frame = +2

Query 42 GIPGHPGHNGAPGRDGRDGTTPGEKGEKGDPLIGP-----KGDIGETGVPGAEGPRGF 95  
G GH G G G +G G+ G+ G+KGD G IG KGD+G G G +G +G  
Sbjct 289190 GDKGHKGDLDGNDGDEGDKGSKGDLGDKGDKGHIGDTGDKGHKGDLDGNDGDKGDQGDI 289369

Query 96 GIQGRKGEPE 106  
GI+G KG+ G+  
Sbjct 289370 GIKGEKGDLDG 289402

Score = 39.3 bits (90), Expect = 0.013, Method: Compositional matrix adjust.  
Identities = 31/65 (48%), Positives = 34/65 (52%), Gaps = 0/65 (0%)  
Frame = +1

Query 42 GIPGHPGHNGAPGRDGRDGTTPGEKGEKGDPLIGPKGDIGETGVPGAEGPRGFPGIQGRK 101  
G G G G G G G G KGEKGD G G KGDIG+ G G G +G G G K  
Sbjct 873997 GDKGEKGDFFGDKGEKGDIGDTGLKGEKGDIGDKGEKGDIGDKGEKGDIGDKGEKGDIGDK 874176

Query 102 GEPGE 106  
GE G+  
Sbjct 874177 GEKGD 874191

Score = 39.3 bits (90), Expect = 0.013, Method: Compositional matrix adjust.  
Identities = 31/68 (46%), Positives = 39/68 (57%), Gaps = 3/68 (4%)  
Frame = +2

Query 42 GIPGHPGHNGAPGRDGRDGTTPGEKGEKGDPLIG---PKGDIGETGVPGAEGPRGFPGIQ 98  
G G G G G +G G GEKG+ GD GL G KGDIG+ G+ G +G +G G +  
Sbjct 336620 GDDGLKGDKGDIGDNLKGDKGEKGDIGDNLKGDKGEKGDIGDNLKGDKGEKGDIGDKGEK 336799

Query 99 GRKGEPGE 106  
G KGE G+  
Sbjct 336800 GDKGEKGD 336823

Score = 39.3 bits (90), Expect = 0.013, Method: Compositional matrix adjust.  
Identities = 28/67 (42%), Positives = 35/67 (52%), Gaps = 0/67 (0%)  
Frame = +2

Query 43 IPGHPGHNGAPGRDGRDGTTPGEKGEKGDPLIGPKGDIGETGVPGAEGPRGFPGIQGRKG 102  
+ G G G G+ G G G KG+KG+ G KGD GE G G +G G GI+G KG  
Sbjct 287684 LKGDKGEKGDKGQKGDNLGNDGIKGDKGESGSAVFKGDKGEKGDKGQKGDNLGNDGIKGDKG 287863

Query 103 EPGEGAY 109  
E G +  
Sbjct 287864 ESGSAVF 287884

Score = 39.3 bits (90), Expect = 0.014, Method: Compositional matrix adjust.  
Identities = 30/70 (43%), Positives = 34/70 (49%), Gaps = 3/70 (4%)  
Frame = +2

Query 40 MAGIPGHPGHNGAPGRDGRDGTTPGEKGEKGDPLIGPKGDIGETGVPGAEGPRGFPGIQG 99  
G G G G G G DG G+KGE G L KGD GE G G +G G GI+G  
Sbjct 287585 FKGDKGEKGDKGQKGDNLGNDGIKGDKGESGSAVL---KGDKGEKGDKGQKGDNLGNDGIKGD 287755

Query 100 RKGEPGEGAY 109  
KGE G +  
Sbjct 287756 DKGESGSAVF 287785

Score = 39.3 bits (90), Expect = 0.014, Method: Compositional matrix adjust.  
Identities = 29/79 (37%), Positives = 37/79 (47%), Gaps = 9/79 (11%)  
Frame = +2

Query 40 MAGIPGHPGHNGAPGRDGRDGTTPGEKGE-----KGDPLIGPKGDIGETGVPGAEG 90  
+ G G G G G G DG G+KGE KG+ G G KGD+G G+ G +G

Sbjct 287684 LKGDKEKGDKGQKGLGNDGIKGDKGESGSAVFKGDKGEKGDKGQKGLGNDGIKGDKG 287863  
Query 91 PRGFPGIQGRKGEPEGAY 109  
G +G KGE G +  
Sbjct 287864 ESGSAVFKGDKGESGSAVF 287920

Score = 39.3 bits (90), Expect = 0.015, Method: Compositional matrix adjust.  
Identities = 30/69 (43%), Positives = 39/69 (57%), Gaps = 3/69 (4%)  
Frame = +2

Query 41 AGIPGHPGHNGAPGRDGRDGTPEKGEKGD---PGLIGPKGDIGETGVPGAEGPRGFPGI 97  
G G G+NG G+ G G G KG+KGD GL G KGD+G+ G G +G +G G  
Sbjct 274976 KGQKGDIGNNGLKGQKGDIGNNGLKGQKGDIGNNGLKGQKGLDGDKNIGNDGLKGQKGD 275155

Query 98 QGRKGEPEG 106  
G KG+ G+  
Sbjct 275156 LGDKGDKGD 275182

Score = 39.3 bits (90), Expect = 0.015, Method: Compositional matrix adjust.  
Identities = 30/65 (46%), Positives = 34/65 (52%), Gaps = 0/65 (0%)  
Frame = +1

Query 42 GIPGHPGHNGAPGRDGRDGTPEKGEKGD PGLIGPKGDIGETGVPGAEGPRGFPGIQGRK 101  
G G G G G G G GEKGE GD G G GD GE G G +G +G G +G K  
Sbjct 276739 GEKGEKGLDGEKGEKGDVGDKEKGETGDKGEKGETGDKGEKGLDGDKEKGETGDKGEK 276918

Query 102 GEPGE 106  
G+ GE  
Sbjct 276919 GDLGE 276933

Score = 39.3 bits (90), Expect = 0.015, Method: Compositional matrix adjust.  
Identities = 32/92 (35%), Positives = 46/92 (50%), Gaps = 3/92 (3%)  
Frame = -3

Query 38 GWMAGIPGHPGHNGAPGRDGRDGTPEKGEKGD PGLIGPKGDIGETGVPGAEGPRGFPGI 97  
G G G G NG G G G G+KG++GD G G +GD G+ G G +G +G G  
Sbjct 1129871 GGFKGGDGSKGENGRHGLRGLKGDKGDQGDQGDQGDQGDQGDQGDQGDQGDQGDQGDQGDQGD 1129692

Query 98 QGRKGE---PEGAYVYRSAFSVGLETYVTIP 126  
QG+ GE G+ ++ ++ VT+P  
Sbjct 1129691 QQVGEQGIKGDNSLIFTFEYTTPGNFSVTVP 1129596

Score = 39.3 bits (90), Expect = 0.015, Method: Compositional matrix adjust.  
Identities = 30/74 (41%), Positives = 38/74 (51%), Gaps = 9/74 (12%)  
Frame = +2

Query 42 GIPGHPGHNGAPGRDGRDGTPE-----KGEKGD PGLIGPKGDIGETGVPGAEGPRG-- 93  
G G G G G DG G GE KG+KG+ G G KGD+G G+ G +G G  
Sbjct 287600 GEKGDKGQKGLGNDGIKGDKGESGSAVLKGDKEKGDKGQKGLGNDGIKGDKGESGSA 287779

Query 94 -FPGIQGRKGEPEG 106  
F G +G KG+ G+  
Sbjct 287780 VFKGDKEKGDKGQ 287821

Score = 39.3 bits (90), Expect = 0.015, Method: Compositional matrix adjust.  
Identities = 27/62 (44%), Positives = 36/62 (58%), Gaps = 0/62 (0%)  
Frame = +2

Query 45 GHPGHNGAPGRDGRDGTTPGEKGEKGDPLIGPKGDIGETGVPGAEGPRGFPGIQGRKGEP 104  
G G G G G G G +KG+KG+ G G KGDIG+ G G +G +G G +G KG+  
Sbjct 339581 GETGLKGDKGDIGDKGDIGDKGDKGEKGDKGEKGDIGDKGEKGDKGEKGDIGDKGEKGD 339760

Query 105 GE 106  
G+  
Sbjct 339761 GD 339766

Score = 39.3 bits (90), Expect = 0.015, Method: Compositional matrix adjust.  
Identities = 31/64 (48%), Positives = 36/64 (56%), Gaps = 6/64 (9%)  
Frame = +2

Query 49 HNGAPGRDGRDGTTPGEKGEKGD-----PGLIGPKGDIGETGVPGAEGPRGFPGIQGRKG 102  
+NG G G G GEKGEKGD G G KGDIGE G+ G +G +G G G KG  
Sbjct 336200 NNGLKGDKGDLDGDKGEKGEKGDIGENGLKGDKGEKGDIGENGLKGDKGEKGDIGETGLKG 336379

Query 103 EPGE 106  
+ GE  
Sbjct 336380 DKGE 336391

Score = 39.3 bits (90), Expect = 0.017, Method: Compositional matrix adjust.  
Identities = 28/61 (46%), Positives = 35/61 (57%), Gaps = 0/61 (0%)  
Frame = +1

Query 45 GHPGHNGAPGRDGRDGTTPGEKGEKGDPLIGPKGDIGETGVPGAEGPRGFPGIQGRKGEP 104  
G G G G G G G +KG+ GD GL G KGDIG G+ G +G G G++G KG+  
Sbjct 276298 GDTGLKGDKGDIGDAGLKGDKGDLGDAGLKGDIGNDGLKGEKGDLDGNDGLKGEKGD 276477

Query 105 G 105  
G  
Sbjct 276478 G 276480

Score = 39.3 bits (90), Expect = 0.017, Method: Compositional matrix adjust.  
Identities = 39/102 (38%), Positives = 50/102 (49%), Gaps = 8/102 (8%)  
Frame = +2

Query 42 GIPGHPGHN--GAPGRDGRDGTTPGE--KGEKGDPLIGPKGDIGETGVPGAEGPRGFPGI 97  
G+ G G + G G G G GE KG+KGD G KGDIGE G+ G EG +G G  
Sbjct 283478 GLKGDLDGESIKGDSGEKGLKGDIGESIKGDKDQGES-IKGDIGEKLKGDDEGEKGSKGD 283654

Query 98 QGRKGEPGEGAYVYRSVGLVLETYVTIPNMPPIRFKIFYNQ 139  
QG KG+ G++ S YV+ PN + +Y Q  
Sbjct 283655 QGLKGDA--GSFTATSWPTLSNIYVS-PNASLAVGAAYYTQ 283771

Score = 38.9 bits (89), Expect = 0.017, Method: Compositional matrix adjust.  
Identities = 31/68 (46%), Positives = 36/68 (53%), Gaps = 5/68 (7%)  
Frame = +2

Query 43 IPGHPGHNGAPGRDGRD--GTPGEKGEKGDPLIGPKGDIGETGVPGAEGPRGFPGIQGR 100

I G G G G G G G G+KGEKGD G G KGD GE+ + G G +G G QG  
 Sbjct 282629 IKGDSGEKGLKGDQGESIKGDSGDKGEKGDGDKGLKGDQGES- IKGDSGEKGLKGDQGE 282805  
 Query 101 --KGEPPGE 106  
 KG+ GE  
 Sbjct 282806 SIKGDSGE 282829

Score = 38.9 bits (89), Expect = 0.017, Method: Compositional matrix adjust.  
 Identities = 32/69 (46%), Positives = 37/69 (54%), Gaps = 3/69 (4%)  
 Frame = +1

Query 41 AGIPGHPGHNGAPGRDGRDGTPEKGEKGDPLIGPKGDI---GETGVPGAEGPRGFPGI 97  
 G+ G G G G G G G G+KGEKGD G G KGD GE G G +G +G G  
 Sbjct 873724 TGLKGDKGDLDGDTGLKGDKGDIGDKGEKGDIGDKGEKGDIGDKGEKGDIGDKGEKGDIGD 873903  
 Query 98 QGRKGEPPGE 106  
 G KGE G+  
 Sbjct 873904 TGLKGEKGD 873930

Score = 38.9 bits (89), Expect = 0.017, Method: Compositional matrix adjust.  
 Identities = 32/71 (45%), Positives = 35/71 (49%), Gaps = 6/71 (8%)  
 Frame = +1

Query 42 GIPGHPGHNGAPGRDGRDGTPE-----KGEKGDPLIGPKGDIGETGVPGAEGPRGF 95  
 G G G G G DG G GE KG+KGD G G KGDIGE G G G F  
 Sbjct 271147 GDVGEKGDKGDLDGNDGDKGDKGESGSAVFKGDKGDIGEKGDIGEKGDIGEKGDIGEKGDIGEK 271326  
 Query 96 GIQGRKGEPPGE 106  
 G +G GE G+  
 Sbjct 271327 GDKGDVGEKGD 271359

Score = 38.9 bits (89), Expect = 0.017, Method: Compositional matrix adjust.  
 Identities = 30/71 (42%), Positives = 36/71 (51%), Gaps = 6/71 (8%)  
 Frame = +1

Query 42 GIPGHPGHNGAPGRDGRDGTPE-----KGEKGDPLIGPKGDIGETGVPGAEGPRGF 95  
 G G G G G DG G GE KG+KGD G G KGD+G G+ G +G G  
 Sbjct 271534 GDVGEKGDKGDLDGNDGDKGDKGESGSAVFKGDKGDVGEKGDIGEKGDIGEKGDIGEKGDIGEK 271713  
 Query 96 GIQGRKGEPPGE 106  
 +G KG+ GE  
 Sbjct 271714 VFKGDKGDVGE 271746

Score = 38.9 bits (89), Expect = 0.018, Method: Compositional matrix adjust.  
 Identities = 31/67 (46%), Positives = 37/67 (55%), Gaps = 6/67 (9%)  
 Frame = +2

Query 45 GHPGHNGAPGRDGRDGTPEKGEKGD-----PGLIGPKGDIGETGVPGAEGPRGFPGIQ 98  
 G G G G G +G G+KGEKGD G G KGDIGETG+ G +G +G G +  
 Sbjct 336233 GDKGEKGEKGDIGENGLKGDKGEKGDIGENGLKGDKGEKGDIGETGLKGDKGEKGDIGEK 336412  
 Query 99 GRKGEPPG 105  
 G GE G  
 Sbjct 336413 GDIGETG 336433

Score = 38.9 bits (89), Expect = 0.018, Method: Compositional matrix adjust.  
 Identities = 29/65 (45%), Positives = 35/65 (54%), Gaps = 0/65 (0%)  
 Frame = +1

Query 42 GIPGHPGHNGAPGRDGRDGTTPGEKGEKGDPLIGPKGDIGETGVPGAEGPRGFPGIQGRK 101  
 G G G G G G G GE G+KG+ G +G KG+ GETG G +G G G +G  
 Sbjct 276775 GEKGDVGDKGEKGETGDKGEKGETGDKGEKGDLDGKGEKGETGDKGEKGDLDGKGEKGDLD 276954

Query 102 GEPGE 106  
 GE GE  
 Sbjct 276955 GEKGE 276969

Score = 38.9 bits (89), Expect = 0.018, Method: Compositional matrix adjust.  
 Identities = 29/65 (45%), Positives = 37/65 (57%), Gaps = 0/65 (0%)  
 Frame = +2

Query 42 GIPGHPGHNGAPGRDGRDGTTPGEKGEKGDPLIGPKGDIGETGVPGAEGPRGFPGIQGRK 101  
 G G G G G G G G+KGEKGD G G KGD G+ G+ G +G G G++G K  
 Sbjct 336467 GDKGDLDGKGEKGDIGETGLKGDKGEKGDIGDKGEKGDIFGDDGLKGEKGDIFGDDGLKGD 336646

Query 102 GEPGE 106  
 G+ G+  
 Sbjct 336647 GDIGD 336661

Score = 38.9 bits (89), Expect = 0.019, Method: Compositional matrix adjust.  
 Identities = 31/71 (44%), Positives = 36/71 (51%), Gaps = 6/71 (8%)  
 Frame = +1

Query 42 GIPGHPGHNGAPGRDGRDGTTPGEKGE-----KGDPLIGPKGDIGETGVPGAEGPRGF 95  
 G G G G G G DG G+KGE KGD G IG KGD G+ G G +G G  
 Sbjct 271138 GDKGDVGEKGDKGDLDGNDGIKGDKGESGSAVFKGDKDIGEKGDIGDKGDKGESGSA 271317

Query 96 GIQGRKGEPEGE 106  
 +G KG+ GE  
 Sbjct 271318 VFKGDKGDVGE 271350

Score = 38.9 bits (89), Expect = 0.019, Method: Compositional matrix adjust.  
 Identities = 31/71 (44%), Positives = 39/71 (55%), Gaps = 6/71 (8%)  
 Frame = +2

Query 42 GIPGHPGHNGAPGRDGRDGTTPGEKGE-----KGDPLIGPKGDIGETGVPGAEGPRGF 95  
 GI G G G G G G GEKG+ KG+ G IG KGD GE G G +G +G  
 Sbjct 337088 GIKGEKGEKGDKGEIGETGLKGEKGDIGDKGNKGEKGDIGDKGDKGEKGDIGDKGQKGD 337267

Query 96 GIQGRKGEPEGE 106  
 G +G+KG+ G+  
 Sbjct 337268 GDKGQKGDKGD 337300

Score = 38.9 bits (89), Expect = 0.020, Method: Compositional matrix adjust.  
 Identities = 33/81 (41%), Positives = 43/81 (53%), Gaps = 10/81 (12%)  
 Frame = +1



Query 42 GIPGHPGHNGAPGRDGRDGTTPGEKGEKGDPLIGPKGDIGETGVP-----GAEGPR 92  
 GI G G +G+ G G GEKG+KGD G G KGD GE+G G +G +  
 Sbjct 271678 GIKGDKGESGSAVFKGDKGDVGEKGDGDLGNDGDKGDKGESGSAVFKGDKGDVGEKGDK 271857

Query 93 GFPGIQGRKGEPE-GAYVYR 112  
 G G G KG+ GE G+ V++  
 Sbjct 271858 GDLGNDGIKGDKGESGSSVFK 271920

Score = 38.9 bits (89), Expect = 0.021, Method: Compositional matrix adjust.  
 Identities = 33/81 (41%), Positives = 43/81 (53%), Gaps = 10/81 (12%)  
 Frame = +1

Query 42 GIPGHPGHNGAPGRDGRDGTTPGEKGEKGDPLIGPKGDIGETGVP-----GAEGPR 92  
 GI G G +G+ G G GEKG+KGD G G KGD GE+G G +G +  
 Sbjct 271480 GIKGDKGESGSAVFKGDKGDVGEKGDGDLGNDGDKGDKGESGSAVFKGDKGDVGEKGDK 271659

Query 93 GFPGIQGRKGEPE-GAYVYR 112  
 G G G KG+ GE G+ V++  
 Sbjct 271660 GDLGNDGIKGDKGESGSAVFK 271722

Score = 38.9 bits (89), Expect = 0.021, Method: Compositional matrix adjust.  
 Identities = 30/74 (41%), Positives = 38/74 (51%), Gaps = 9/74 (12%)  
 Frame = +2

Query 42 GIPGHPGHNGAPGRDGRDGTTPGE-----KGEKGDPLIGPKGDIGETGVPGAEGPRG-- 93  
 G G G G G DG G GE KG+KG+ G G KGD+G G+ G +G G  
 Sbjct 288023 GEKGDKGQKGDGDLGNDGLKGDKGESGSAVFKGDKGEKGDGQKGDGDLGNDGLKGDKGESGSA 288202

Query 94 -FPGIQGRKGEPE 106  
 F G +G KG+ G+  
 Sbjct 288203 VFKGDKGEKGDGQ 288244

Score = 38.9 bits (89), Expect = 0.022, Method: Compositional matrix adjust.  
 Identities = 28/67 (42%), Positives = 37/67 (55%), Gaps = 0/67 (0%)  
 Frame = +1

Query 40 MAGIPGHPGHNGAPGRDGRDGTTPGEKGEKGDPLIGPKGDIGETGVPGAEGPRGFPGIQG 99  
 + G G G G G G G G KG+KGD G IG KG+ G+ G G +G G G++G  
 Sbjct 873244 LKGEKGDIGDTGLKGDGKGNIGDTGLKGDGDLGDLGDKGEKGDIGDKGEKGDIGDTGLK 873423

Query 100 RKGEPE 106  
 KG+ G+  
 Sbjct 873424 EKGDIGD 873444

Score = 38.5 bits (88), Expect = 0.024, Method: Compositional matrix adjust.  
 Identities = 27/65 (42%), Positives = 34/65 (52%), Gaps = 0/65 (0%)  
 Frame = +1

Query 42 GIPGHPGHNGAPGRDGRDGTTPGEKGEKGDPLIGPKGDIGETGVPGAEGPRGFPGIQGRK 101  
 G+ G G G G G G G GEKG+ GD G KGD+G+ G G G +G G +G K  
 Sbjct 272560 GLKGDGKGDGDLGDKGDLGDKGEKGDGDKGKSDKGLGDKGEKGDGSDGDKGEKGDGKGEK 272739

Query 102 GEPGE 106  
 G G+

Sbjct 272740 GNIGD 272754

Score = 38.5 bits (88), Expect = 0.024, Method: Compositional matrix adjust.  
Identities = 24/50 (48%), Positives = 31/50 (62%), Gaps = 3/50 (6%)  
Frame = +2

Query 60 GTPGEKGEKGDPLIGPKGDIGETGVPGAEGPRG---FPGIQGRKGEPE 106  
G GEKG+KGD G G KGD+G G+ G +G G F G +G KG+ G+  
Sbjct 288560 GDKGEKGDKGDSDGDKGQKGDLDGNDGLKGDKGESGSAVFKGDKGEKGDKGQ 288709

Score = 38.5 bits (88), Expect = 0.025, Method: Compositional matrix adjust.  
Identities = 30/76 (39%), Positives = 38/76 (50%), Gaps = 9/76 (12%)  
Frame = +2

Query 40 MAGIPGHPGHNGAPGRDGRDGTPE-----KGEKGDPLIGPKGDIGETGVPGAEGPRG 93  
G G G G G DG G GE KG+KG+ G G KGD+G G+ G +G G  
Sbjct 287918 FKGDKGDGKQKGDLDGNDGIKGDKGESGSAVFKGDKGEKGDGKQKGDLDGNDGLKGDKGESG 288097

Query 94 ---FPGIQGRKGEPE 106  
F G +G KG+ G+  
Sbjct 288098 SAVFKGDKGEKGDKGQ 288145

Score = 38.5 bits (88), Expect = 0.025, Method: Compositional matrix adjust.  
Identities = 28/66 (42%), Positives = 34/66 (52%), Gaps = 0/66 (0%)  
Frame = +2

Query 44 PGHPGHNGAPGRDGRDGTPEKGEKGDPLIGPKGDIGETGVPGAEGPRGFPGIQGRKGE 103  
G G G G+ G G G KG+KG+ G KGD GE G G +G G GI+G KGE  
Sbjct 288110 KGDGKGEKGDGKQKGDLDGNDGLKGDKGESGSAVFKGDKGEKGDGKQKGDLDGNDGIKGDKGE 288289

Query 104 PGE GAY 109  
G +  
Sbjct 288290 SGS AVF 288307

Score = 38.5 bits (88), Expect = 0.026, Method: Compositional matrix adjust.  
Identities = 28/70 (40%), Positives = 38/70 (54%), Gaps = 6/70 (9%)  
Frame = +2

Query 40 MAGIPGHPGHNGAPGRDGRDGTPE-----KGEKGDPLIGPKGDIGETGVPGAEGPRG 93  
+ G G G+NG G+ G G G KG+KGD G G KGD+G G+ G +G G  
Sbjct 275045 LKGQKGDIGNNGLKGQKGDLDGDKGNIGNDGLKQKGDLDGDKGDLDGNDGLKGNKGDLDG 275224

Query 94 FPGIQGRKGE 103  
G++G KG+  
Sbjct 275225 NDGLKGEKGD 275254

Score = 38.5 bits (88), Expect = 0.027, Method: Compositional matrix adjust.  
Identities = 27/64 (42%), Positives = 38/64 (59%), Gaps = 0/64 (0%)  
Frame = +2

Query 42 GIPGHPGHNGAPGRDGRDGTPEKGEKGDPLIGPKGDIGETGVPGAEGPRGFPGIQGRK 101  
G+ G G +G+ G G G+KG+KGD G G KGD GE+G +G +G G +G+K  
Sbjct 288167 GLKGDKGESGSAVFKGDKGEKGDGKQKGDLDGNDGIKGDKGESGSAVFKGDKGEKGDGKQK 288346

Query 102 GEPG 105  
G+ G  
Sbjct 288347 GDLG 288358

Score = 38.5 bits (88), Expect = 0.027, Method: Compositional matrix adjust.  
Identities = 29/66 (44%), Positives = 35/66 (53%), Gaps = 0/66 (0%)  
Frame = +1

Query 41 AGIPGHPGHNGAPGRDGRDGTPEKGEKGDPLIGPKGDIGETGVPGAEGPRGFPGIQGR 100  
+G G G G G G G GEKG+ GD G G GD GE G G +G +G G +G  
Sbjct 276709 SGEKGEKGDLDLGEKGEKGDLDLGEKGEKGDVGDGKGEKGETGDKGEKGETGDKGEKGDLDLGDKE 276888

Query 101 KGEPGE 106  
KGE G+  
Sbjct 276889 KGETGD 276906

Score = 38.5 bits (88), Expect = 0.028, Method: Compositional matrix adjust.  
Identities = 29/67 (43%), Positives = 34/67 (51%), Gaps = 0/67 (0%)  
Frame = +1

Query 40 MAGIPGHPGHNGAPGRDGRDGTPEKGEKGDPLIGPKGDIGETGVPGAEGPRGFPGIQG 99  
+ G G G G G G G G KGEKGD G G KGD+G+ G G G G +G  
Sbjct 873478 LKGEKGDLDLDTGLKGEKGDIGDTGLKGEKGDIGDKGEKGDLDLGDKEKGDIGDTGLKGDKE 873657

Query 100 RKGEPGE 106  
G+ GE  
Sbjct 873658 DLGDKE 873678

Score = 38.5 bits (88), Expect = 0.028, Method: Compositional matrix adjust.  
Identities = 27/64 (42%), Positives = 38/64 (59%), Gaps = 0/64 (0%)  
Frame = +2

Query 42 GIPGHPGHNGAPGRDGRDGTPEKGEKGDPLIGPKGDIGETGVPGAEGPRGFPGIQGRK 101  
G+ G G +G+ G G G +KG+KGD G G KGD GE+G +G +G G +G+K  
Sbjct 288068 GLKGDKGESGSAVFKGDKGEKGDKGQKGDLDLNDLKGDKGESGSAVFKGDKGEKGDKGQK 288247

Query 102 GEPG 105  
G+ G  
Sbjct 288248 GDLG 288259

Score = 38.5 bits (88), Expect = 0.028, Method: Compositional matrix adjust.  
Identities = 29/59 (49%), Positives = 34/59 (58%), Gaps = 6/59 (10%)  
Frame = +2

Query 54 GRDGRDGTPEKGEKGDPLIGPKGDIGETGVPGAEGPRGFPGIQGRKGEKGEK 106  
G G DG GEKGEKGD GL G KGDIG+ G G +G G G +G KG+ G+  
Sbjct 337070 GDKGDDGIKGEKGEKGDKEIGETGLKGEKGDIGDKGNKGEKGDIGDKGDKGEKGDIGD 337246

Score = 38.5 bits (88), Expect = 0.029, Method: Compositional matrix adjust.  
Identities = 27/67 (40%), Positives = 37/67 (55%), Gaps = 0/67 (0%)  
Frame = +1

Query 40 MAGIPGHPGHNGAPGRDGRDGTTPGEKGEKGDPLIGPKGDIGETGVPGAEGPRGFPGIQG 99  
 + G G G++G G G G+ KG+KGD G G KGD+G G+ G +G G +G  
 Sbjct 271060 IKGDKGDLGNDGIKGDKGESGSAVFKGDKGDVGEKGDKGLDNDGIKGDKGESGSAVFKG 271239

Query 100 RKGEPGE 106  
 KG+ GE  
 Sbjct 271240 DKGDIGE 271260

Score = 38.1 bits (87), Expect = 0.030, Method: Compositional matrix adjust.  
 Identities = 30/69 (43%), Positives = 38/69 (55%), Gaps = 3/69 (4%)  
 Frame = +1

Query 41 AGIPGHPGHNGAPGRDGRDGTTPGEK---GEKGDPLIGPKGDIGETGVPGAEGPRGFPGI 97  
 +G G G +G G G G GEK GEKG+ G +G KG+ GETG G +G G G  
 Sbjct 276682 SGEKGEKGDSEKGEKGDLEKGEKGDLEKGEKGDVGDKGEKGETGDKGEKGETGDKGE 276861

Query 98 QGRKGEPEGE 106  
 +G G+ GE  
 Sbjct 276862 KGDLEKGE 276888

Score = 38.1 bits (87), Expect = 0.030, Method: Compositional matrix adjust.  
 Identities = 31/68 (46%), Positives = 36/68 (53%), Gaps = 3/68 (4%)  
 Frame = +1

Query 42 GIPGHPGHNGAPGRDGRDGTTPGEKGEKGDPLIGPKGDIGETGVP---GAEGPRGFPGIQ 98  
 G G G G G G G GEKG+ GD GL G KGDIG+ G G +G +G G  
 Sbjct 873880 GEKGDIGDTGLKGEKGDLEKGEKGDIGDTGLKGEKGDIGDKGEKGDLEKGEKGDIGDT 874059

Query 99 GRKGEPEGE 106  
 G KGE G+  
 Sbjct 874060 GLKGEKGD 874083

Score = 38.1 bits (87), Expect = 0.031, Method: Compositional matrix adjust.  
 Identities = 27/66 (41%), Positives = 35/66 (53%), Gaps = 0/66 (0%)  
 Frame = +1

Query 44 PGHPGHNGAPGRDGRDGTTPGEKGEKGDPLIGPKGDIGETGVPGAEGPRGFPGIQGRKGE 103  
 G G G G G G G G+KG+KG+ G KGD G+ G+ G +G G GI+G KGE  
 Sbjct 271324 KGDKGDVGEKGDKGLDNDGDKGDKGESGSAVFKGDKGDVGIKGDKGLDNDGIKGDKGE 271503

Query 104 PGE GAY 109  
 G +  
 Sbjct 271504 SGS AVF 271521

Score = 38.1 bits (87), Expect = 0.031, Method: Compositional matrix adjust.  
 Identities = 30/65 (46%), Positives = 34/65 (52%), Gaps = 0/65 (0%)  
 Frame = +1

Query 42 GIPGHPGHNGAPGRDGRDGTTPGEKGEKGDPLIGPKGDIGETGVPGAEGPRGFPGIQGRK 101  
 G G G G G +G G GEKG GD GL G KGDIG+ G G G G +G  
 Sbjct 276019 GEKGDIGDAGPKGDEGNIGDKGEKGNLGDAGLKGDKGDIGDKGEKGNLGDAGLKGDKGDI 276198

Query 102 GEPGE 106  
 G+ GE

Sbjct 276199 GDKGE 276213

Score = 38.1 bits (87), Expect = 0.031, Method: Compositional matrix adjust.  
Identities = 24/56 (43%), Positives = 32/56 (57%), Gaps = 0/56 (0%)  
Frame = +2

Query 60 GTPGEKGEKGDPLIGPKGDIGETGVPGAEGPRGFPGIQGRKGEPGEGAYVYRSAF 115  
G G+KG+ GD G G KGDIGE G+ G +G +G G G KG+ GE + +  
Sbjct 336206 GLKGDKGLDGLDKGEKGEKGDIGENGLKGDKGEKGDIGENGLKGDKGEKGDIGETGL 336373

Score = 38.1 bits (87), Expect = 0.032, Method: Compositional matrix adjust.  
Identities = 32/68 (47%), Positives = 37/68 (54%), Gaps = 5/68 (7%)  
Frame = +2

Query 43 IPGHPhNGAPGRDGRD--GTPGEKGEKGDPLIGPKGDIGETGVPGAEGP--RGFPGIQ 98  
I G G G G DG G G KGEKGD G KGDIGE G+ G +G +G G +  
Sbjct 282143 IKGDSGEKGLKGDGDESIGKGDIGTKGEKGDQGES-IKGDIGEKGLKGDGDESIGKGDIGTK 282319

Query 99 GRKGEPGE 106  
G KG+ GE  
Sbjct 282320 GEKGDGGE 282343

Score = 38.1 bits (87), Expect = 0.032, Method: Compositional matrix adjust.  
Identities = 32/68 (47%), Positives = 37/68 (54%), Gaps = 5/68 (7%)  
Frame = +2

Query 43 IPGHPhNGAPGRDGRD--GTPGEKGEKGDPLIGPKGDIGETGVPGAEGP--RGFPGIQ 98  
I G G G G DG G G KGEKGD G KGDIGE G+ G +G +G G +  
Sbjct 283250 IKGDSGEKGLKGDGDESIGKGDIGTKGEKGDQGES-IKGDIGEKGLKGDGDESIGKGDIGTK 283426

Query 99 GRKGEPGE 106  
G KG+ GE  
Sbjct 283427 GEKGDGGE 283450

Score = 38.1 bits (87), Expect = 0.032, Method: Compositional matrix adjust.  
Identities = 27/67 (40%), Positives = 34/67 (51%), Gaps = 0/67 (0%)  
Frame = +2

Query 40 MAGIPGHPhNGAPGRDGRDGTPEKGEKGDPLIGPKGDIGETGVPGAEGPRGFPGIQG 99  
+ G G G G G DGT G+KGE G G KGD GE+G +G +G G +G  
Sbjct 287333 VKGDKGEKAKEKQKGDLDNDGTGDKGESGSAVFKGDKGDKGESGSAVFKGDKGEKGEK 287512

Query 100 RKGEPEGE 106  
KG G+  
Sbjct 287513 DKGHKGD 287533

Score = 38.1 bits (87), Expect = 0.033, Method: Compositional matrix adjust.  
Identities = 29/64 (45%), Positives = 37/64 (58%), Gaps = 0/64 (0%)  
Frame = +1

Query 42 GIPGHPhNGAPGRDGRDGTPEKGEKGDPLIGPKGDIGETGVPGAEGPRGFPGIQGRK 101  
G G G +G+ G G GEKG+KGD G G KGD GE+G +G +G GI+G K  
Sbjct 271282 GEKGDKGESGSAVFKGDKGDVGEKGDKGLDNDGDKGDKGESGSAVFKGDKGDVGIKGD 271461

Query 102 GEPG 105  
G+ G  
Sbjct 271462 GDLG 271473

Score = 38.1 bits (87), Expect = 0.035, Method: Compositional matrix adjust.  
Identities = 29/66 (44%), Positives = 33/66 (50%), Gaps = 0/66 (0%)  
Frame = +2

Query 40 MAGIPGHPGHNGAPGRDGRDGTTPGEKGEKGDPLIGPKGDIGETGVPGAEGPRGFPGIQG 99  
G G G G G G G G KG+KG+ G KGD GE G G +G G GI+G  
Sbjct 287477 FKGDKGEKGEKGDKGHKGDFGNDGIKGDKGESGSAVFKGDKGEKGDKGQKGDLDGNDGIK 287656

Query 100 RKGEPG 105  
KGE G  
Sbjct 287657 DKGESG 287674

Score = 38.1 bits (87), Expect = 0.035, Method: Compositional matrix adjust.  
Identities = 30/69 (43%), Positives = 37/69 (54%), Gaps = 3/69 (4%)  
Frame = +1

Query 41 AGIPGHPGHNGAPGRDGRDGTTPGEKGEKGDPLIGPKGDI---GETGVPGAEGPRGFPGI 97  
G+ G G G G G G GEKG+ GD GL G KGD+ GE G G +G +G G  
Sbjct 873544 TGLKGEKGDIGDKGEKGDLDGKGEKGDIGDTGLKGDKGDLDGKGEKGDIGDKGEKGDIGD 873723

Query 98 QGRKGEPE 106  
G KG+ G+  
Sbjct 873724 TGLKGDKGD 873750

Score = 37.7 bits (86), Expect = 0.041, Method: Compositional matrix adjust.  
Identities = 27/68 (40%), Positives = 39/68 (57%), Gaps = 6/68 (9%)  
Frame = +2

Query 45 GHPGHNGAPGRDGRDGTTPGEKGEKGDPLIGPKGDIGETGVPGAEGPR-----GFPGIQ 98  
G+ G G G G +G G+KG+ G+ GL G KGDIG G+ G +G G G++  
Sbjct 274961 GNDGSKGQKGDIGNNGLKGQKGDIGNNGLKGQKGDIGNNGLKGQKGDLDGKGNIGNDGLK 275140

Query 99 GRKGEPE 106  
G+KG+ G+  
Sbjct 275141 GQKGDLDG 275164

Score = 37.7 bits (86), Expect = 0.041, Method: Compositional matrix adjust.  
Identities = 29/66 (44%), Positives = 33/66 (50%), Gaps = 0/66 (0%)  
Frame = +1

Query 41 AGIPGHPGHNGAPGRDGRDGTTPGEKGEKGDPLIGPKGDIGETGVPGAEGPRGFPGIQGR 100  
G+ G G G G G G G KGEKGD G G KGD G+ G G G G +G  
Sbjct 873904 TGLKGEKGDLDGKGEKGDIGDTGLKGEKGDIGDKGEKGDGDKGEKGDIGDTGLKGEKGD 874083

Query 101 KGEPE 106  
G+ GE  
Sbjct 874084 IGDKGE 874101

Score = 37.7 bits (86), Expect = 0.044, Method: Compositional matrix adjust.  
Identities = 28/62 (45%), Positives = 32/62 (52%), Gaps = 0/62 (0%)  
Frame = +2

Query 45 GHPGHNGAPGRDGRDGTTPGEKGEKGDPLIGPKGDIGETGVPGAEGPRGFPGIQGRKGEP 104  
G G G G G G GEKG+KGD G G KGDIG G G G G +G G+  
Sbjct 337313 GDKGEKGDAGEKGEKGDLEKGDIGDKGEKGDIGNKGEKGDLDLDTGLKGDKGDLDGK 337492

Query 105 GE 106  
G+  
Sbjct 337493 GD 337498

Score = 37.7 bits (86), Expect = 0.045, Method: Compositional matrix adjust.  
Identities = 29/65 (45%), Positives = 34/65 (52%), Gaps = 0/65 (0%)  
Frame = +1

Query 42 GIPGHPGHNGAPGRDGRDGTTPGEKGEKGDPLIGPKGDIGETGVPGAEGPRGFPGIQGRK 101  
G G G G G G G G+KGEKGD G G KGD GE G G +G +G G G K  
Sbjct 272614 GDKGEKGDLDGKGEKSDKGDLDGKGEKGDSDGKGEKGDKGEKGNIGDKGEKGDMDIGLK 272793

Query 102 GEPGE 106  
G+ G+  
Sbjct 272794 GDKGD 272808

Score = 37.7 bits (86), Expect = 0.046, Method: Compositional matrix adjust.  
Identities = 30/65 (46%), Positives = 34/65 (52%), Gaps = 0/65 (0%)  
Frame = +1

Query 42 GIPGHPGHNGAPGRDGRDGTTPGEKGEKGDPLIGPKGDIGETGVPGAEGPRGFPGIQGRK 101  
G G G G G G G G KG+KGD G G KGDIG+ G G G +G G G K  
Sbjct 873700 GEKGDIGDTGLKGDKGDLDLDTGLKGDKGDIGDKGEKGDIGDKGEKGDIGDKGEKGDIGDK 873879

Query 102 GEPGE 106  
GE G+  
Sbjct 873880 GEKGD 873894

Score = 37.7 bits (86), Expect = 0.046, Method: Compositional matrix adjust.  
Identities = 28/64 (44%), Positives = 37/64 (58%), Gaps = 0/64 (0%)  
Frame = +2

Query 42 GIPGHPGHNGAPGRDGRDGTTPGEKGEKGDPLIGPKGDIGETGVPGAEGPRGFPGIQGRK 101  
G+ G G G G G G G G+KG+KGD G G KGD GE+G +G +G G +G+K  
Sbjct 288533 GLKGDKGDVGDGKGEKGDKGDSDGDKGQKGDLDGNDGLKGDKGESESAVFKGDGKGEKGDGKQK 288712

Query 102 GEPG 105  
G+ G  
Sbjct 288713 GDLG 288724

Score = 37.7 bits (86), Expect = 0.050, Method: Compositional matrix adjust.  
Identities = 29/65 (45%), Positives = 36/65 (55%), Gaps = 0/65 (0%)  
Frame = +2

Query 42 GIPGHPGHNGAPGRDGRDGTTPGEKGEKGDPLIGPKGDIGETGVPGAEGPRGFPGIQGRK 101  
G G G G G G G G+KG+KGD G G KGD G+ G G +G +G G +G K

Sbjct 337178 GNKGEKGDIGDKGDKGEKGDIGDKGQKGDIGDKGQKGDGDKGDIGDKGEKGDAGEKGEK 337357

Query 102 GEPGE 106  
G+ GE

Sbjct 337358 GDLGE 337372

Score = 37.4 bits (85), Expect = 0.058, Method: Compositional matrix adjust.  
Identities = 27/66 (41%), Positives = 34/66 (52%), Gaps = 0/66 (0%)  
Frame = +2

Query 44 PGHPGHNGAPGRDGRDGTTPGEKGEKGDPLIGPKGDIGETGVPGAEGPRGFPGIQGRKGE 103  
G G G G+ G G G KG+KG+ G KGD GE G G +G G G++G KGE

Sbjct 288011 KGDGKGEKGDGKQKGDLDGNDGLKGDGKESGSAVFKGDKGEKGDGKQKGDLDGNDGLKGDGKGE 288190

Query 104 PGE GAY 109  
G +

Sbjct 288191 SGSAVF 288208

Score = 37.4 bits (85), Expect = 0.060, Method: Compositional matrix adjust.  
Identities = 33/81 (41%), Positives = 43/81 (53%), Gaps = 13/81 (16%)  
Frame = +1

Query 42 GIPGHPGHNGAPGRDGRDGTTPGEKGEKGDPLIGPKGDIGETGVP-----GAEGPR 92  
GI G G +G+ G G GEKG+KGD IG KGD GE+G G +G +

Sbjct 271192 GIKGDGKESGSAVFKGDKGDIGEKGDGKGD---IGEKGDGKESGSAVFKGDKGVDGKGDGK 271362

Query 93 GFPGIQGRKGE PGE-GAYVYR 112  
G G G KG+ GE G+ V++

Sbjct 271363 GDLGNDGDKGDKGESGSAVFK 271425

Score = 37.4 bits (85), Expect = 0.060, Method: Compositional matrix adjust.  
Identities = 30/65 (46%), Positives = 37/65 (57%), Gaps = 3/65 (5%)  
Frame = +2

Query 45 GHPGHNGAPGRDGRDGTTPGEKGEKGDPLIG---PKGDIGETGVPGAEGPRGFPGIQGRK 101  
G G G G G DG G+KG+ GD GL G KGDIG+ G+ G +G +G G G K

Sbjct 336584 GDDGLKGEKGDGFDGDDGLKGDGKGDIGDNLKGDGKGEKGDIGDNLKGDGKGEKGDIGDNLK 336763

Query 102 GEPGE 106  
G+ GE

Sbjct 336764 GDKGE 336778

Score = 37.4 bits (85), Expect = 0.061, Method: Compositional matrix adjust.  
Identities = 30/65 (46%), Positives = 34/65 (52%), Gaps = 0/65 (0%)  
Frame = +2

Query 42 GIPGHPGHNGAPGRDGRDGTTPGEKGEKGDPLIGPKGDIGETGVPGAEGPRGFPGIQGRK 101  
G G G G G G G G G+KG+KGD G G KGD GE G G G +G G G K

Sbjct 337223 GEKGDIGDKGQKGDIGDKGQKGDGDKGDIGDKGKGDAGEKGEKGDAGEKGDAGEKGDAGEKGDAGEK 337402

Query 102 GEPGE 106  
GE G+

Sbjct 337403 GEKGD 337417



Score = 37.4 bits (85), Expect = 0.062, Method: Compositional matrix adjust.  
Identities = 29/71 (41%), Positives = 39/71 (55%), Gaps = 6/71 (8%)  
Frame = +2

Query 42 GIPGHPGHNGAPGRDGRDGTTPGEKGEKGDPLIGPKGDIGETGVPGAEGPRG-----FP 95  
GI G G +G+ G G G+KG+KGD G G KGD GE+G +G +G F  
Sbjct 287744 GIKGDKGESGSAVFKGDKGEKGDKGQKGLDNDGIKDKGESGSAVFKGDKGESGSAVFK 287923

Query 96 GIQGRKGEPEGE 106  
G +G KG+ G+  
Sbjct 287924 GDKGDKGQKGD 287956

Score = 37.4 bits (85), Expect = 0.063, Method: Compositional matrix adjust.  
Identities = 28/65 (43%), Positives = 36/65 (55%), Gaps = 0/65 (0%)  
Frame = +2

Query 42 GIPGHPGHNGAPGRDGRDGTTPGEKGEKGDPLIGPKGDIGETGVPGAEGPRGFPGIQGRK 101  
G G G G G G G G+ GEKGD G IG KG+ G+ G G +G G G++G K  
Sbjct 337295 GDKGDIGDKGEKGDAGEKGEKGDLDGEKGDKGDIGDKGEKGDIGNKGEKGDLDGDTGLKGDK 337474

Query 102 GEPGE 106  
G+ G+  
Sbjct 337475 GDLGD 337489

Score = 37.4 bits (85), Expect = 0.067, Method: Compositional matrix adjust.  
Identities = 30/71 (42%), Positives = 36/71 (51%), Gaps = 6/71 (8%)  
Frame = +1

Query 42 GIPGHPGHNGAPGRDGRDGTTPGEKGE-----KGDPLIGPKGDIGETGVPGAEGPRGF 95  
G G G G G G DG G+KGE KGD G G KGD G+ G G +G +G  
Sbjct 271822 GDKGDVGEKGDKGLDNDGIKDKGESGSSVFKGDKGEKGDKGDGLDNDGIKDKGES 272001

Query 96 GIQGRKGEPEGE 106  
G G KG+ G+  
Sbjct 272002 GDDGLKGDIGD 272034

Score = 37.0 bits (84), Expect = 0.073, Method: Compositional matrix adjust.  
Identities = 27/62 (44%), Positives = 34/62 (55%), Gaps = 0/62 (0%)  
Frame = +1

Query 45 GHPGHNGAPGRDGRDGTTPGEKGEKGDPLIGPKGDIGETGVPGAEGPRGFPGIQGRKGEPE 104  
G G G G G G GEK +KGD G G KGD G+ G G +G +G G +G KG+  
Sbjct 272596 GDKGDLGDKGEKGDLDGKGEKSDKGDLDGKGEKGDSDGKGEKGDKGEKGNIGDKGEKGD 272775

Query 105 GE 106  
G+  
Sbjct 272776 GD 272781

Score = 37.0 bits (84), Expect = 0.073, Method: Compositional matrix adjust.  
Identities = 29/65 (45%), Positives = 34/65 (52%), Gaps = 0/65 (0%)  
Frame = +2

Query 42 GIPGHPGHNGAPGRDGRDGTTPGEKGEKGDPLIGPKGDIGETGVPGAEGPRGFPGIQGRK 101

Sbjct 339293 G G G G G G G GEKG+ GD G G KGD+G+ G G G +G G G K  
 GETGLKGDKGDKGDLGDLGEKGEKGDVGDVGDGKGEKGDVGDVGEKGDVGDGKGEKGDVGDK 339472

Query 102 GEPGE 106  
 GE G+

Sbjct 339473 GEKGD 339487

Score = 37.0 bits (84), Expect = 0.075, Method: Compositional matrix adjust.  
 Identities = 31/88 (35%), Positives = 38/88 (43%), Gaps = 21/88 (24%)  
 Frame = +2

Query 40 MAGIPGHPGHNGAPGRDGRDGTTPGEKGE-----KGDPLIGPKGDIG 81  
 G G G G G G DG G+KGE KGD G G KGD+G

Sbjct 287783 FKGDKGEKGDKGQKGDLDGNDGIKGDKGESGSAVFKGDKGESGSAVFKGDKGDKGQKGDLDG 287962

Query 82 ETGVPGAEGPRG---FPGIQGRKGEPEGE 106  
 G+ G +G G F G +G KG+ G+

Sbjct 287963 NDGIKGDKGESGSAVFKGDKGEKGDKGQ 288046

Score = 37.0 bits (84), Expect = 0.077, Method: Compositional matrix adjust.  
 Identities = 30/65 (46%), Positives = 36/65 (55%), Gaps = 3/65 (5%)  
 Frame = +2

Query 45 GHPGHNGAPGRDGRDGTTPGEKGEKGDPLIGPKGDIGETGVP---GAEGPRGFPGIQGRK 101  
 G G G G G G G+KGEKGD G IG KG+ GE+G G +G +G G G K

Sbjct 336746 GDNGLKGDKGEKGDGKGEKGDGKGDIGDKGNKGESGSAVFKGDKGEKGDGTGEIGLK 336925

Query 102 GEPGE 106  
 GE G+

Sbjct 336926 GEKGD 336940

Score = 37.0 bits (84), Expect = 0.078, Method: Compositional matrix adjust.  
 Identities = 28/65 (43%), Positives = 34/65 (52%), Gaps = 3/65 (5%)  
 Frame = +1

Query 45 GHPGHNGAPGRDGRDGTTPGEKGEKGDPLIGPKGDIGETGVPGAEGPRGFPGIQGRKGEPE 104  
 G+ G G G G DG G+KGE G G KGD+GE G +G G GI+G KGE

Sbjct 271048 GNDGIKGDKGDLDGNDGIKGDKGESGSAVFKGDKGDVGE---KGDKGDLDGNDGIKGDKGES 271218

Query 105 GEGAY 109  
 G +

Sbjct 271219 GSAVF 271233

Score = 37.0 bits (84), Expect = 0.081, Method: Compositional matrix adjust.  
 Identities = 28/66 (42%), Positives = 35/66 (53%), Gaps = 0/66 (0%)  
 Frame = +2

Query 41 AGIPGHPGHNGAPGRDGRDGTTPGEKGEKGDPLIGPKGDIGETGVPGAEGPRGFPGIQGR 100  
 G+ G G G G G G G KG+KGD G G KGD+G+ G G G G G +G

Sbjct 336365 TGLKGDKGEKGDIGEKGDIGETGLKGDKGDLDGDKGDLDGDKGEKGDIGETGLKGDKGE 336544

Query 101 KGEPGE 106  
 KG+ G+

Sbjct 336545 KGDIGD 336562

Score = 37.0 bits (84), Expect = 0.083, Method: Compositional matrix adjust.  
Identities = 30/74 (41%), Positives = 38/74 (51%), Gaps = 9/74 (12%)  
Frame = +2

Query 42 GIPGHPGHNGAPGRDGRDGTPE-----KGEKGDPLIGPKGDIGETGVPGAEGPRG-- 93  
G G G G G DG G GE KG+KG+ G G KGD+G G+ G +G G  
Sbjct 288587 GDSGDKGQKGDLDGNDGLKGDKGESGSAVFKGDKGEKGDKGQKGDLDGNDGIKGDKGESGSA 288766

Query 94 -FPGIQGRKGEPE 106  
F G +G KG+ G+  
Sbjct 288767 VFKGDKGEKGDKGQ 288808

Score = 37.0 bits (84), Expect = 0.090, Method: Compositional matrix adjust.  
Identities = 29/68 (43%), Positives = 38/68 (56%), Gaps = 3/68 (4%)  
Frame = +2

Query 42 GIPGHPGHNGAPGRDGRDGTPEKGEKGDPLIGPKGD---IGETGVPGAEGPRGFPGIQ 98  
G GH G G G G G G++G+KG G +G KGD IG+TG G +G G G +  
Sbjct 289163 GDKGHIGDTGDKGHKGDLDGNDGLKGDKESGDLGDKGDGHIGDTGDKGHKGDLDGNDGLKGDK 289342

Query 99 GRKGEPE 106  
G KG+ G+  
Sbjct 289343 GDKGDQGD 289366

>NC\_020842.1 Cellulophaga phage phiST genomic sequence  
Length=79114

Score = 52.8 bits (125), Expect = 6e-07, Method: Compositional matrix adjust.  
Identities = 34/73 (47%), Positives = 40/73 (55%), Gaps = 6/73 (8%)  
Frame = -3

Query 40 MAGIPGHPGHNGAPGRDGRDGTPEKGEKGD-----PGLIGPKGDIGETGVPGAEGPRG 93  
+ G G G G G G G G GEKGEKGD G+ G KGDIG TG+ GA+G G  
Sbjct 56144 LKGSDDLVEKGEKGDVGEKGDVGEKGEKGDVGTGADGIQGEKGDIGPTGLTGAKGDIG 55965

Query 94 FPGIQGRKGEPE 106  
G QG KG+ G+  
Sbjct 55964 LTGAQGEKGDQGD 55926

Score = 48.1 bits (113), Expect = 2e-05, Method: Compositional matrix adjust.  
Identities = 35/89 (39%), Positives = 40/89 (45%), Gaps = 24/89 (27%)  
Frame = -3

Query 42 GIPGHPGHNGAPGRDGRDGTPEKGEKGDPLIGPKGDIGETG----- 84  
G G G G G G DG GEKG+ G GL G KGDIG TG  
Sbjct 56084 GDVGEKGEKGDVGTGADGIQGEKGDIGPTGLTGAKGDIGLGTGAQGEKGDQGDVGEKGEK 55905

Query 85 -----VPGAEGPRGFPGIQGRKGEPE 106  
+ GA+G +G GIQG KGE G+  
Sbjct 55904 GEKGDIGLGTGAQGDQGIQGIQGEKGEKGD 55818

>NC\_010324.1 Enterobacteria phage phiEco32, complete genome

Length=77554

Score = 52.4 bits (124), Expect = 8e-07, Method: Compositional matrix adjust.  
Identities = 38/120 (32%), Positives = 53/120 (44%), Gaps = 8/120 (7%)  
Frame = -2

Query 42 GIPGHPGHNGAPGRDGRDGTTPGEKGEKGDPLIGPKGDIGETGVPGAEGPRGFPPGIQGRK 101  
G G G GA G DG+DG G+ G +G+ G G G GETG+ GA G G G+ G+  
Sbjct 70242 GDQGEKGDGTGANGIDGKDGIDGKDGAQGEKGDSDGADGKKGETGLTGAAGLNGVDGLNGKN 70063

Query 102 GEPGEGAYVYRSASFVGLETYVTIPNMPPIRFTKIFYNQQNHYDGSTGKFHCNIPGLYYFA 161  
G+ + + V +A S I + K F + Q D + I G+ A  
Sbjct 70062 GKDADMSAVNANAKS-----IKALEQSTNKRFAQLQKQVDRNRDHASAGISGVAAMA 69907

Score = 38.1 bits (87), Expect = 0.036, Method: Compositional matrix adjust.  
Identities = 22/46 (48%), Positives = 27/46 (59%), Gaps = 0/46 (0%)  
Frame = -2

Query 60 GTPGEKGEKGDPLIGPKGDIGETGVPGAEGPRGFPPGIQGRKGEPE 105  
G G ++GEKGD G G G G G GA+G +G G G +KGE G  
Sbjct 70251 GEKGDQGEKGDGTGANGIDGKDGIDGKDGAQGEKGDSDGADGKKGETG 70114

>NC\_029120.1 Shigella phage 75/02 Stx, complete genome  
Length=60875

Score = 52.4 bits (124), Expect = 9e-07, Method: Compositional matrix adjust.  
Identities = 56/192 (29%), Positives = 76/192 (40%), Gaps = 22/192 (11%)  
Frame = +2

Query 42 GIPGHPGHNGAPGRDGRDGTTPGEKGEKGDPLIGPKGDIGETGVPGAEGPRGFPPGIQGRK 101  
G G G G G G G GE+G KGD G +GPKG+ G+ GV G GP G G +G  
Sbjct 38282 GEKGEQGERGPPQIPGLKGDGTGERGPKGDQGDMPKGEKGDPGVAGPAGPEGPQGPKGDT 38461

Query 102 GEPGEGAYVYRSA-----FSVGLETYVTI-----PNMPPIRFTKIFYNQQNHYDGST 147  
G PG+G + +A F+ G+ +T+ ++ IR K D +  
Sbjct 38462 GAPGQGTPELLTTANTWTQAQTFNGGINGNLTVNGNGSFNDVQIRSDKRNKRNLVKLDNAL 38641

Query 148 GKFHCNIPGLYYFAYHITVYMKDVKVSFLFKKDKAM--LFTYDQYQENNVDAQSGSVLLHL 205  
+ LY Y + V + KA+ L T D D SG L L  
Sbjct 38642 DRLEALTGYLYEIQYSADGWQTSVGLIAQDAQKALPELVTE-----ADVISGEKRLRL 38803

Query 206 EVGDQVWLQVYG 217  
+ L V G  
Sbjct 38804 NYNGIALLVEG 38839

Score = 42.4 bits (98), Expect = 0.002, Method: Compositional matrix adjust.  
Identities = 27/61 (44%), Positives = 33/61 (54%), Gaps = 0/61 (0%)  
Frame = +2

Query 45 GHPGHNGAPGRDGRDGTTPGEKGEKGDPLIGPKGDIGETGVPGAEGPRGFPPGIQGRKGEPE 104  
G G G G G G GE+G+ G G +GP G GE G G GP+G PG++G GE  
Sbjct 38174 GPKGETGVPVGPQGPAGPKGERGDVGAQGAQAVGPAGPRGEKGEQGERGPPQIPGLKGDGTGER 38353

Query 105 G 105  
G

Sbjct 38354 G 38356

>NC\_031001.1 Gordonia phage Terapin, complete genome  
Length=66611

Score = 52.0 bits (123), Expect = 1e-06, Method: Compositional matrix adjust.  
Identities = 34/71 (48%), Positives = 43/71 (61%), Gaps = 3/71 (4%)  
Frame = +3

Query 42 GIPGHPGHNGAPGRDGRDGTPEKGEKGDPLIGPKGDIGETG---VPGAEGPRGFPGIQ 98  
GI G G G G DG +G G +G KGD GL G KGD G+TG + G +GP+G GIQ  
Sbjct 24750 GIQGIQGVQGIQGEDGPEGPQGPQGTGKDTGLKGDKGDGDTGDQGIQGVQGPKGDQGIQ 24929

Query 99 GRKGEPGEGAY 109  
G +G PG ++  
Sbjct 24930 GVQGPPTTSW 24962

Score = 44.7 bits (104), Expect = 3e-04, Method: Compositional matrix adjust.  
Identities = 27/51 (53%), Positives = 34/51 (67%), Gaps = 6/51 (12%)  
Frame = +2

Query 63 GEKGEKGDPLIGPKGDIGET-----GVPGAEGPRGFPGIQGRKGEPGEG 107  
GEK++GDPG GPKGD G+T GVPG +GP+G G +G G+ G G  
Sbjct 23930 GEKGDQGDGPGPQGPKGDGDTGSQGLQGVPGDQGPQDRGEKGDGTGDTGRG 24082

Score = 37.7 bits (86), Expect = 0.050, Method: Compositional matrix adjust.  
Identities = 21/42 (50%), Positives = 29/42 (69%), Gaps = 0/42 (0%)  
Frame = +2

Query 65 KGEKGDPLIGPKGDIGETGVPGAEGPRGFPGIQGRKGEPGE 106  
+GEKGD G GP+G G+ G G++G +G PG QG +G+ GE  
Sbjct 23927 RGEKGDQGDGPGPQGPKGDGDTGSQGLQGVPGDQGPQDRGE 24052

>NC\_025416.1 Staphylococcus phage MCE-2014, complete genome  
Length=141907

Score = 51.2 bits (121), Expect = 2e-06, Method: Compositional matrix adjust.  
Identities = 37/94 (39%), Positives = 45/94 (48%), Gaps = 3/94 (3%)  
Frame = -2

Query 40 MAGIPGHPGHNGAPGRDGRDGTPEKGEKGD---PGLIGPKGDIGETGVPGAEGPRGFPG 96  
+ G G G G G G G PGEKGE+G+ G GPKGDIG G G GP+G G  
Sbjct 10917 LKGADGAQGEQGPQGPKGDGKGEPEKGEQGERGPEGSEGPKGDIGPQGPPTGPMGPKGDKG 10738

Query 97 IQGRKGEPGEGAYVYRSFVGLLETYVTIPNMPI 130  
G KGE G G+ + E Y +P+  
Sbjct 10737 NTGEKGEKNGSVNQTRLPQILREQYFENLEIPV 10636

Score = 40.0 bits (92), Expect = 0.008, Method: Compositional matrix adjust.  
Identities = 33/91 (36%), Positives = 39/91 (43%), Gaps = 23/91 (25%)  
Frame = -2

Query 39 WMAGIPGHPGHNGAPGRDGRDGTPEKGEKGDPLIGPKGDIGETGV----- 85

W+ I G G G G G G G KG++G G GPKGD G GV  
 Sbjct 11115 WVKSIKGEQGPQGIKGRGLQGPQGPKGDRGLQGPQGPKGDRGADGVDGIDGTMTEELT 10936  
 Query 86 -----PGAEGPRGFPGIQGRKGEPE 106  
 GA+G +G G +G KGEPE  
 Sbjct 10935 EEQKATLKGADGAQGEQGPQGPKGDKGEPE 10843

Score = 38.9 bits (89), Expect = 0.018, Method: Compositional matrix adjust.  
 Identities = 32/80 (40%), Positives = 38/80 (48%), Gaps = 14/80 (18%)  
 Frame = -2

Query 40 MAGIPGHPGHNGAPGRDGRDGT-----PGEKGEKGDPLIGPKGDIGETGV 85  
 + G G G GA G DG DGT G G +G+ G GPKGD GE G  
 Sbjct 11022 LQGPQGPKGDRGADGVDGIDGTMTEELTEEQKATLKGADGAQGEQGPQGPKGDKGEPE 10843  
 Query 86 PGAEGPRGFPGIQGRKGEPE 105  
 G +G RG G +G KG+ G  
 Sbjct 10842 KGEQGERGPEGSEGPKGDIG 10783

>NC\_032108.1 Cedratvirus All genome assembly, complete genome: monopartite  
 Length=589068

Score = 51.2 bits (121), Expect = 2e-06, Method: Compositional matrix adjust.  
 Identities = 36/83 (43%), Positives = 43/83 (52%), Gaps = 18/83 (22%)  
 Frame = -3

Query 42 GIPGHPGHNGAPGRDGRDGTTPGEKGEKGDPLIGPKGDIGETG-----VP 86  
 G PG PG +G PG+DG+DG G+ GEKGDG G G GE G P  
 Sbjct 567682 GDPGEPKGDGEPGKDGKDLNGKDGEKGDPLIGPKGDIGETG-----VP 567503  
 Query 87 GAEGPRGF---PGIQGRKGEPE 106  
 G +G +G PG G+ GE GE  
 Sbjct 567502 GKDGEKGDQGPQGPKGDKGEKGE 567434

Score = 49.7 bits (117), Expect = 6e-06, Method: Compositional matrix adjust.  
 Identities = 31/65 (48%), Positives = 38/65 (58%), Gaps = 6/65 (9%)  
 Frame = -3

Query 42 GIPGHPGHNGAPGRDGRDGTTPGEKGEKGDPLIGPKGDIGETGVPGAEGPRGFPGIQGRK 101  
 G G G G PG+DG +G GEKGEKGD G+ G+ G PG +G G G G K  
 Sbjct 567763 GEKGEKGDQGEPEPKDGLNGKDGEKGEKGDPLIGPKGDIGETGVPGAEGPRGFPGIQGRK 567602  
 Query 102 GEPGE 106  
 G+PG+  
 Sbjct 567601 GDPGK 567587

Score = 49.3 bits (116), Expect = 8e-06, Method: Compositional matrix adjust.  
 Identities = 31/70 (44%), Positives = 42/70 (60%), Gaps = 6/70 (9%)  
 Frame = -3

Query 43 IPGHPGHNGAPGRDGRDGTTPGEKGEKGDPLIGPKGDIGETGVPGAEGPRGFPG 96  
 I G G +G G +G+DG GEKG++G+P G G KG+ G+ G PG +G G G  
 Sbjct 567877 IAGEKGRDGLNGKDGEKGEKGDQGEPEPKDGLNGKDGEKGEKGDQGEPEPKDGLNGKDG 567698

Query 97 IQGRKGEPEG 106  
+G KG+PGE  
Sbjct 567697 EKGEKGDPEG 567668

Score = 48.1 bits (113), Expect = 2e-05, Method: Compositional matrix adjust.  
Identities = 46/167 (28%), Positives = 63/167 (38%), Gaps = 33/167 (20%)  
Frame = +3

Query 42 GIPGHPGHNGAPGRDGRDGTPEKGEKGDPLIGPKGDIGETGVPGAEGPRGFPGIQGRK 101  
G+ G+ G G G G G+ G GE+G G G G G TGV GA+G G G QG+  
Sbjct 523470 GVTGNTGVTGQQGNTGVTGSQGNIGERGVTGADGVTGQQGNTGVTGADGVTGNTGSQQT 523649

Query 102 GEPGE-----GAYVYRSAFSVGLETYVTIPNMPPIRFTKI-----F 136  
G G G+ A S +T N+P +  
Sbjct 523650 GVTGSQQTGVTGSQQTGVTGSQQTGALSSEFMDAITSTNIPYVIANVTPYEFDEVTL 523829

Query 137 YNQQNHYDGTGKGFHCNIPGLYYFAYHI-----TVYMKDVKVSL 175  
+ + Y+ T +F G+YY+A+ I VYM V L  
Sbjct 523830 ISPGSTYNAVTFNEFVAGSTGVYVYAFKICGYNTSATNVYMLTNSVQL 523970

Score = 45.4 bits (106), Expect = 1e-04, Method: Compositional matrix adjust.  
Identities = 31/67 (46%), Positives = 36/67 (54%), Gaps = 6/67 (9%)  
Frame = -3

Query 42 GIPGHPGHNGAPGRDGRDGTPEKGEKGD-----GLIGPKGDIGETGVPGAEGPRGF 95  
G G G G PG+DG +G GEKGEKGD G+ G G+ GE G PG G G P  
Sbjct 567826 GEKGEKGDQGEPEGKDGINGKDGKGEKGEKGDQGEPEGKDGINGKDGKGEKGEKGDPEPEGKDGEP 567647

Query 96 GIQGRKG 102  
G G+ G  
Sbjct 567646 GKDGKDG 567626

Score = 44.3 bits (103), Expect = 4e-04, Method: Compositional matrix adjust.  
Identities = 28/67 (42%), Positives = 33/67 (49%), Gaps = 2/67 (3%)  
Frame = +3

Query 41 AGIPGHPGHNGAPGRDGRDGTPEK--GEKGDPLIGPKGDIGETGVPGAEGPRGFPGIQ 98  
A I G G+ G G G G G G+ G+ G G+ GETGV G EG G PG+  
Sbjct 258429 ASITGETGNTGVTGAQGETGVTGVSVTGATGEVGTGNNGNTGETGVTGEEGASGLPGLT 258608

Query 99 GRKGEPEG 105  
G G G  
Sbjct 258609 GEGGVTG 258629

Score = 43.9 bits (102), Expect = 4e-04, Method: Compositional matrix adjust.  
Identities = 27/64 (42%), Positives = 34/64 (53%), Gaps = 0/64 (0%)  
Frame = +3

Query 42 GIPGHPGHNGAPGRDGRDGTPEKGEKGDPLIGPKGDIGETGVPGAEGPRGFPGIQGRK 101  
G+ G G G G G DG G G +G+ G G GDIG TGV G++G G G+ G  
Sbjct 258600 GLTGEQGVVTGNTGSTGVDGLTGVGTGAQGNTGNTGLTGDIGNTGVTGSQGNTGNTGLTGNT 258779

Query 102 GEPG 105  
G+ G

Sbjct 258780 GQTG 258791

Score = 42.0 bits (97), Expect = 0.002, Method: Compositional matrix adjust.  
Identities = 28/68 (41%), Positives = 36/68 (53%), Gaps = 2/68 (3%)  
Frame = -2

Query 42 GIPGHPGHNGAPGRDGRDGT--PGEKGEKGDPLIGPKGDIGETGVPGAEGPRGFPGIQQ 99  
G+ G+ G G G G G G G +G G+ G+ GP+G++G TGV G G G G QQ  
Sbjct 211040 GVTGNTGVTGQQGNTGVTGAGETGAQGVNTGVTGTPQGEVNTGVTGEVGVTVTGSQG 210861

Query 100 RKGEPGEG 107  
G GEG  
Sbjct 210860 NTGATGEG 210837

Score = 41.6 bits (96), Expect = 0.002, Method: Compositional matrix adjust.  
Identities = 28/65 (43%), Positives = 38/65 (58%), Gaps = 3/65 (5%)  
Frame = -3

Query 42 GIPGHPGHNGAPGRDGRDGTTPGEKGEKGDPLIGPKGDIGETGVPGAEGPRGFPGIQQGRK 101  
G G PG +G +G+DG GEKG+ G+PG G G G+ G+ G +G +G PG G  
Sbjct 567745 GDQGEPEGKDG I---NGKDGEKGEKGDPEPGKDGEPKDGKDLNGKDGEKGDPEKDGKDLN 567575

Query 102 GEPGE 106  
G+ GE  
Sbjct 567574 GKDGE 567560

Score = 40.0 bits (92), Expect = 0.007, Method: Compositional matrix adjust.  
Identities = 29/63 (46%), Positives = 34/63 (54%), Gaps = 3/63 (5%)  
Frame = +3

Query 45 GHPGHNGAPGRDGRDGTTPGEKGEKGDPLIGPKGDIGETGVPGAEGPRGFPGIQQGRK--G 102  
G+ G GA G G G G+ G G+ G IG GDIG TGV GA G +G G+ G G  
Sbjct 258267 GNTGVTGAQGETGVTGADGDIGNTGETG-IGVTDIGNTGVTGASGEQGETGVTGASITG 258443

Query 103 EPG 105  
E G  
Sbjct 258444 ETG 258452

Score = 40.0 bits (92), Expect = 0.008, Method: Compositional matrix adjust.  
Identities = 28/62 (45%), Positives = 31/62 (50%), Gaps = 0/62 (0%)  
Frame = -3

Query 42 GIPGHPGHNGAPGRDGRDGTTPGEKGEKGDPLIGPKGDIGETGVPGAEGPRGFPGIQQGRK 101  
G PG G NG G G G PGE G+ G+PG G G G+ G G G G G K  
Sbjct 567736 GEPGKDGINGKDGKGEKGEKGDPEPGKDGEPKDGKDLNGKDGEKGDPEKDGKDLNGKDGK 567557

Query 102 GE 103  
GE  
Sbjct 567556 GE 567551

Score = 40.0 bits (92), Expect = 0.009, Method: Compositional matrix adjust.  
Identities = 34/83 (41%), Positives = 41/83 (49%), Gaps = 15/83 (18%)  
Frame = -3



Query 42 GIPGHPGHNGAPGRDGRDGTTPGEKGE-----KGDPLIGPKGDIGETGVPGA 89  
 G+ G G G PG+DG +G GEKGE G+PG G KGD G PG +  
 Sbjct 567628 GLNGKDGEKGDGPKDGLNGKDGEKGEKGDGPKDGDGKDGEKGDGPKDGEKGD---QGPPGKD 567458

Query 90 GPRGFPGIQGRKGEPEGAYVYR 112  
 G G G +G GEPG+ A R  
 Sbjct 567457 GKDGEKGEKGDGPEPGKDAPRER 567389

Score = 39.3 bits (90), Expect = 0.016, Method: Compositional matrix adjust.  
 Identities = 24/55 (44%), Positives = 28/55 (51%), Gaps = 0/55 (0%)  
 Frame = +2

Query 52 APGRDGRDGTTPGEKGEKGDPLIGPKGDIGETGVPGAEGPRGFPGIQGRKGEPE 106  
 A G G G G G +G+ G+ G GD+G TGV G G G G QG G GE  
 Sbjct 185036 AQQNTGVTGENGVTGAQQNTGVTGTDVGTGVTGVTGASGNTGSQGNTGVTGE 185200

Score = 38.9 bits (89), Expect = 0.022, Method: Compositional matrix adjust.  
 Identities = 29/88 (33%), Positives = 39/88 (44%), Gaps = 7/88 (8%)  
 Frame = -3

Query 42 GIPGHPGHNGAPGRDGRDGTTPGEKGEKGDPLIGPKGDIGETGVPGAEGPRGFPGIQG-- 99  
 G G G G PG+DG+DG GEKG+ G+PG P+ + E G + P G  
 Sbjct 567502 GKDGEKGDQGPFGKDGKDGEKGEKGDGPEPGKDAPRERLEEQQKYLSSPEGLSTNSTL 567323

Query 100 -RKGEPEGAYVYRSAFVSVGLETYVTIP 126  
 + EP + SVG E + P  
 Sbjct 567322 LKSEEP----FAINGNLSVGYENKTSAP 567251

>NC\_017972.1 Pseudomonas phage Lull, complete genome  
 Length=280538

Score = 50.4 bits (119), Expect = 3e-06, Method: Compositional matrix adjust.  
 Identities = 37/77 (48%), Positives = 44/77 (57%), Gaps = 4/77 (5%)  
 Frame = +1

Query 29 LPLPKGACTGWMAGIPGHPGHNGAPGRDGRDGTTPGEKGEKGDPLIG---PKGDIGETGV 85  
 LP+P G G G PG +G G+DGRDG PG G +G G+IG PKG+ G TG  
 Sbjct 188590 LPVPSRIPVG-PTGPQGLPGLDGKNGKDRDGAPGAGCEGPGQVIGQTGPKGETGRTGQ 188766

Query 86 PGAEGPRGFPGIQGRK 102  
 PG GP G G QG +G  
 Sbjct 188767 PGPAGPTGPTGPQGLQG 188817

Score = 40.0 bits (92), Expect = 0.008, Method: Compositional matrix adjust.  
 Identities = 28/62 (45%), Positives = 34/62 (55%), Gaps = 0/62 (0%)  
 Frame = +3

Query 42 GIPGHPGHNGAPGRDGRDGTTPGEKGEKGDPLIGPKGDIGETGVPGAEGPRGFPGIQGRK 101  
 G PG PG + G+DG+DG G G +G G GP GD G G GA GP G G G +  
 Sbjct 185445 GDPGRPGRDAEDGKDGDGQAGCAGPRGPEGRPGMPGDPGIEGEVGAAPGPGYGPLGPTGPR 185624

Query 102 GE 103  
 G+

Sbjct 185625 GD 185630

Score = 39.3 bits (90), Expect = 0.013, Method: Compositional matrix adjust.  
Identities = 25/43 (58%), Positives = 27/43 (63%), Gaps = 3/43 (7%)  
Frame = +1

Query 56 DGRDGTTPGEKGEKGDPLIGPKGDIGETGVPGAEGPRGFPGIQ 98  
DGRDGT G GE+G G GP G G+T G EGPRG GIQ  
Sbjct 189712 DGRDGTNGRDGEQGATGCQPPGPRGDT---GPEGPRGPQGIQ 189831

Score = 37.4 bits (85), Expect = 0.056, Method: Compositional matrix adjust.  
Identities = 43/139 (31%), Positives = 56/139 (40%), Gaps = 8/139 (6%)  
Frame = +2

Query 45 GHPGHNGAPGRDGRDGTTPGEKGEKGDPLIGPKGDIGETGVPGAEGPRGF---PGIQGRK 101  
G PG G G G G G G G GP+G IG TG G GP+G G G K  
Sbjct 194126 GLPGEKGPPIGPTGPAGPTGPSGGAGQIGPTGPQGIIGLTGATGPTGPQGEIGPIGPTGPK 194305

Query 102 GEPG-EGAYVYRSFAFSVGLETYVTIPNMP---IRFTKIFYNQNHYDGSTGKFHCNIPGL 157  
GE G EGA + V +P P FT F+ +N G G +  
Sbjct 194306 GESGTEGATGLQGPPGEPGPAGVGLPGPPGASAIFTNDFWTHENPSVGRYGSIEVGDKTM 194485

Query 158 YYF-AYHITVYMKDVKVSL 175  
Y + ++D+ ++L  
Sbjct 194486 EIMGTYKSSSSVQDISLTL 194542

>NC\_021782.1 Salmonella phage FSL SP-076, complete genome  
Length=72098

Score = 50.4 bits (119), Expect = 4e-06, Method: Compositional matrix adjust.  
Identities = 37/119 (31%), Positives = 53/119 (45%), Gaps = 4/119 (3%)  
Frame = +3

Query 40 MAGIPGHPGHNGAPGRDGRDGTTPGEKGEKGDPLIGPKGDI---GETGVPGAEGPRGFPG 96  
+G G G NG G +GRDG G+ G KGD G G G GE G G G G G  
Sbjct 7149 ASGKDGKDGLNGTNGTNGRDGVDGKDGAKGDTGAQGEAGKDGLNGENKDGKGLNGTNGLDG 7328

Query 97 IQGRKGEPEGAYVYRSFAFSVGLETYVTIPNMPPIRFTKIFYNQNHYDGSTGKFHCNIP 155  
+G KG+ G+ + + G + +T N K +Q+ ++ ST + N+  
Sbjct 7329 AKGDKGDEGKQGIAGIAGLN-GKDADMTQVNANTEANKSISKRQDAFEKSTNQRFANMD 7502

Score = 47.4 bits (111), Expect = 3e-05, Method: Compositional matrix adjust.  
Identities = 27/65 (42%), Positives = 36/65 (55%), Gaps = 0/65 (0%)  
Frame = +3

Query 42 GIPGHPGHNGAPGRDGRDGTTPGEKGEKGDPLIGPKGDIGETGVPGAEGPRGFPGIQGRK 101  
G G G +GA G+DG +G G KG+KGD G G G G+ G+ G G G G+ G+  
Sbjct 7047 GKDGIDGKDGANGKDGINGIDGAKGDKGDKGDTGASGKDGKDGKGLNGTNGTNGRDGVDGKD 7226

Query 102 GEPGE 106  
G G+  
Sbjct 7227 GAKGD 7241

Score = 47.4 bits (111), Expect = 3e-05, Method: Compositional matrix adjust.  
Identities = 29/64 (45%), Positives = 33/64 (52%), Gaps = 0/64 (0%)  
Frame = +3

Query 42 GIPGHPGHNGAPGRDGRDGTTPGEKGEKGDPLIGPKGDIGETGVPGAEGPRGFPGIQGRK 101  
GI G G NG G +G DG G+KG+KGD G G G G G G G G G K  
Sbjct 7056 GIDGKDGANGKDGINGIDGAKGDKGDKGDTGASGKDGKDLNGTNGTNGRDGVDGKDGAK 7235

Query 102 GEPG 105  
G+ G  
Sbjct 7236 GDTG 7247

Score = 46.6 bits (109), Expect = 5e-05, Method: Compositional matrix adjust.  
Identities = 27/63 (43%), Positives = 32/63 (51%), Gaps = 0/63 (0%)  
Frame = +3

Query 43 IPGHPGHNGAPGRDGRDGTTPGEKGEKGDPLIGPKGDIGETGVPGAEGPRGFPGIQGRKG 102  
I G G +G G DG+DG G+ G G G G KGD G+TG G +G G G G G  
Sbjct 7023 IKGQDGDGKDGIDGKDGANGKDGINGIDGAKGDKGDKGDTGASGKDGKDLNGTNGTNG 7202

Query 103 EPG 105  
G  
Sbjct 7203 RDG 7211

>NC\_014649.1 Acanthamoeba polyphaga mimivirus, complete genome  
Length=1181549

Score = 50.1 bits (118), Expect = 4e-06, Method: Compositional matrix adjust.  
Identities = 33/80 (41%), Positives = 44/80 (55%), Gaps = 2/80 (3%)  
Frame = +3

Query 27 VLLPLPKGACTGWMAGIPGHPGHNGAPGRDGRDGTTPGEKGEKGDPLIGPKGDIGETGVP 86  
L+ +GA G+ G PG NG+ G G G G+KG KGD G G KGD G G+  
Sbjct 298362 TLVSNLRGAS--GAQGVKGDPSNGSKGKTKGEKGDGKDKGSKGDNKEKGEKGDAGLNGLD 298535

Query 87 GAEGPRGFPGIQGRKGEPGE 106  
G++G +G G +G KG G+  
Sbjct 298536 GSKGDKGDDGSKGSKGNKGD 298595

Score = 49.7 bits (117), Expect = 6e-06, Method: Compositional matrix adjust.  
Identities = 32/67 (48%), Positives = 39/67 (58%), Gaps = 0/67 (0%)  
Frame = -1

Query 40 MAGIPGHPGHNGAPGRDGRDGTTPGEKGEKGDPLIGPKGDIGETGVPGAEGPRGFPGIQG 99  
+ G G G G G G G GEKG+KGD G IG KGD G+TG G +G +G G +G  
Sbjct 884876 IKGDKGDIGEKGDGKDIGEKGNKGEKGDGKDKGDKDIGEKGDGKDTGSKGDKGDKGEKGDGK 884697

Query 100 RKGEPGE 106  
KGE G+  
Sbjct 884696 DKGEKGD 884676

Score = 49.7 bits (117), Expect = 6e-06, Method: Compositional matrix adjust.  
Identities = 32/66 (48%), Positives = 39/66 (59%), Gaps = 0/66 (0%)  
Frame = -1

Query 41 AGIPGHPGHNGAPGRDGRDGTTPGEKGEKGDPLIGPKGDIGETGVPGAEGPRGFPGIQGR 100  
AG+ G G G G G G G +KGEKGD GL G KGDIG G G +G RG G +G  
Sbjct 883829 AGLKGDKGDIGQKGDKGTGDRGDKGEKGDAGLKGNKGDIGLKGDKGTGDRGDKGTGDKD 883650

Query 101 KGEPGE 106  
+G+ G+  
Sbjct 883649 RGDKGD 883632

Score = 48.9 bits (115), Expect = 1e-05, Method: Compositional matrix adjust.  
Identities = 29/65 (45%), Positives = 39/65 (60%), Gaps = 0/65 (0%)  
Frame = -1

Query 42 GIPGHPGHNGAPGRDGRDGTTPGEKGEKGDPLIGPKGDIGETGVPGAEGPRGFPGIQGRK 101  
G+ G G+NG PG G G G+KGE G+ G G KGD G+ G G +G +G G +G K  
Sbjct 885743 GLKGEKGNNGDPGEKGEKGA KGD KGESGEKGA KGD KGDIGEKGEKGD KGDIGEKGEK 885564

Query 102 GEPGE 106  
G+ G+  
Sbjct 885563 GDKGD 885549

Score = 48.9 bits (115), Expect = 1e-05, Method: Compositional matrix adjust.  
Identities = 30/65 (46%), Positives = 41/65 (63%), Gaps = 0/65 (0%)  
Frame = +1

Query 42 GIPGHPGHNGAPGRDGRDGTTPGEKGEKGDPLIGPKGDIGETGVPGAEGPRGFPGIQGRK 101  
GI G G G G G +GT G+KG+ GD G+ G KGDIG+ G+ G +G +G G +G K  
Sbjct 237829 GIKGDNGTKGDNGTKGDNGTKGD KGDIGDNGIKGD KGDIGDNGIKGD KGNKGDNGDKGNK 238008

Query 102 GEPGE 106  
G+ G+  
Sbjct 238009 GDKGD 238023

Score = 48.9 bits (115), Expect = 1e-05, Method: Compositional matrix adjust.  
Identities = 32/67 (48%), Positives = 39/67 (58%), Gaps = 0/67 (0%)  
Frame = -1

Query 40 MAGIPGHPGHNGAPGRDGRDGTTPGEKGEKGDPLIGPKGDIGETGVPGAEGPRGFPGIQG 99  
G G G GA G G G GEKGEKGD G IG KG+ G+ G G +G +G G +G  
Sbjct 885686 AKGDKGESGEKGA KGD KGDIGEKGEKGD KGDIGEKGEKGD KGDIGEKGD KGDIGEKGD LGEK 885507

Query 100 RKGEPGE 106  
KG+PG+  
Sbjct 885506 EKGDPGQ 885486

Score = 48.1 bits (113), Expect = 2e-05, Method: Compositional matrix adjust.  
Identities = 29/64 (45%), Positives = 39/64 (61%), Gaps = 0/64 (0%)  
Frame = -3

Query 42 GIPGHPGHNGAPGRDGRDGTTPGEKGEKGDPLIGPKGDIGETGVPGAEGPRGFPGIQGRK 101  
G G+ G G+ G G +G G++G+KGD G G KGD G G G++G +G GI+G K  
Sbjct 879108 GSKGYKGD KGS KGTGKNNGFKGD RGD KGD KGS KGDNGIKGNKGS KGD KGDNGIKGEK 878929

Query 102 GEPG 105

GE G  
Sbjct 878928 GESG 878917

Score = 47.0 bits (110), Expect = 4e-05, Method: Compositional matrix adjust.  
Identities = 32/65 (49%), Positives = 37/65 (57%), Gaps = 6/65 (9%)  
Frame = -1

Query 42 GIPGHPGHNGAPGRDGRDGTTPGEKGEKGDPLIGPKGDIGETGVPGAEGPRGFPGIQGRK 101  
GI G G G G G +G PGEKGEK G KGD GE+G GA+G +G G G K  
Sbjct 885770 GIKGEKGDRLKGEKGNNGDPGEKGEK-----GAKGDKGESGEKGAKGDKGDKDIGEK 885609

Query 102 GEPGE 106  
GE G+  
Sbjct 885608 GEKGD 885594

Score = 47.0 bits (110), Expect = 5e-05, Method: Compositional matrix adjust.  
Identities = 31/67 (46%), Positives = 38/67 (57%), Gaps = 3/67 (4%)  
Frame = +2

Query 42 GIPGHPGHNGAPGRDGRDGTTPGEKGEKGDPLIGPKG---DIGETGVPGAEGPRGFPGIQ 98  
G G PG G+ G G G G KG+KGDPG+ G G D G+ G G++G +G GI  
Sbjct 293147 GDKGDPGIKGSKGEKGSKGDGKSGDKGDPGIKGESGADADKGDGDKGSKGDKGDKGID 293326

Query 99 GRKGEPG 105  
G KGE G  
Sbjct 293327 GNKGEKG 293347

Score = 47.0 bits (110), Expect = 5e-05, Method: Compositional matrix adjust.  
Identities = 29/65 (45%), Positives = 39/65 (60%), Gaps = 0/65 (0%)  
Frame = +1

Query 42 GIPGHPGHNGAPGRDGRDGTTPGEKGEKGDPLIGPKGDIGETGVPGAEGPRGFPGIQGRK 101  
GI G G G G G G G +KG+KG+ G+ G KGD G GV G +G +G G++G K  
Sbjct 239917 GIKGESGSKGDKGEKGNKGYKGDGDKGNLGIKGDGDKGIKGVKGTGDKGDKTKGVKGTK 240096

Query 102 GEPGE 106  
G+ G+  
Sbjct 240097 GDKGD 240111

Score = 46.2 bits (108), Expect = 8e-05, Method: Compositional matrix adjust.  
Identities = 29/63 (46%), Positives = 34/63 (54%), Gaps = 0/63 (0%)  
Frame = -3

Query 43 IPGHPGHNGAPGRDGRDGTTPGEKGEKGDPLIGPKGDIGETGVPGAEGPRGFPGIQGRKG 102  
+ G G G+ G G DG G KG KGD G G KGD G+ G G G +G G +G KG  
Sbjct 879348 LKGEKGEIGSKGTGDDGNKGNKGIKGDGKTTGDKGDKGDVGNKGDAGDKGDAGKKGEKG 879169

Query 103 EPG 105  
E G  
Sbjct 879168 EMG 879160

Score = 45.8 bits (107), Expect = 1e-04, Method: Compositional matrix adjust.  
Identities = 30/65 (46%), Positives = 37/65 (57%), Gaps = 0/65 (0%)

Frame = -1

Query 42 GIPGHPGHNGAPGRDGRDGTTPGEKGEKGDPLIGPKGDIGETGVPGAEGPRGFPGIQGRK 101  
G PG G GA G G G G KG+KGD G IG KG+ G+ G G +G +G G G K  
Sbjct 885716 GDPGEKGEKGAKGDKGESGEKGAKGDKGDKDIGEKGEKGDIGEKGEKGDIGEK 885537

Query 102 GEPGE 106  
G+ G+  
Sbjct 885536 GDKGD 885522

Score = 45.8 bits (107), Expect = 1e-04, Method: Compositional matrix adjust.  
Identities = 29/65 (45%), Positives = 36/65 (55%), Gaps = 0/65 (0%)  
Frame = -3

Query 42 GIPGHPGHNGAPGRDGRDGTTPGEKGEKGDPLIGPKGDIGETGVPGAEGPRGFPGIQGRK 101  
G G G NG G G +G G KG+KGD G G KGD G+ G G +G +G G G K  
Sbjct 878127 GDNGDKDNGDKGNKGDNGDKGNKGDNGDKGNKGDNGDKGNKGDNGDKGNKGD 877948

Query 102 GEPGE 106  
G+ G+  
Sbjct 877947 GDNGD 877933

Score = 45.4 bits (106), Expect = 2e-04, Method: Compositional matrix adjust.  
Identities = 30/64 (47%), Positives = 38/64 (59%), Gaps = 0/64 (0%)  
Frame = +3

Query 42 GIPGHPGHNGAPGRDGRDGTTPGEKGEKGDPLIGPKGDIGETGVPGAEGPRGFPGIQGRK 101  
G G G +G G +G G G+KG KG+ GL G KGDIG+ G G++G G G +G K  
Sbjct 298884 GNKGDKGEDGLKGENGDIGDKGDKGSKGEDGLKGDIGDKGDKGSKGEDGLK 299063

Query 102 GEPG 105  
GE G  
Sbjct 299064 GEIG 299075

Score = 45.1 bits (105), Expect = 2e-04, Method: Compositional matrix adjust.  
Identities = 32/76 (42%), Positives = 42/76 (55%), Gaps = 4/76 (5%)  
Frame = -3

Query 45 GHPGHNGAPGRDGRDGTTPGEKGEKGDPLIGPKGDIGETGVPGAEGPRGFPGIQGRKGE 104  
G G+ G G G G G KG++GD G G KGD G+ G+ G +G +G G G KGE  
Sbjct 879108 GSKGYKGDGKSGKGTGNNGFKGDRGDKGDKGDKGDKGDKGDKGDKGDKGDK 878929

Query 105 GE-GAYVYRSAFSVGL 119  
GE G+ + F +GL  
Sbjct 878928 GESGSSIL---FGMGL 878890

Score = 45.1 bits (105), Expect = 2e-04, Method: Compositional matrix adjust.  
Identities = 29/65 (45%), Positives = 34/65 (52%), Gaps = 0/65 (0%)  
Frame = -3

Query 42 GIPGHPGHNGAPGRDGRDGTTPGEKGEKGDPLIGPKGDIGETGVPGAEGPRGFPGIQGRK 101  
G G G NG G G G G+KG+KGD G G KGD G+ G G G +G G G K  
Sbjct 878244 GDKGDKDNGDKGNKGDNGDKGDKGDKGDKGDKGDKGDKGDKGDKGDKGDKGDK 878065

Query 102 GEPGE 106  
G G+  
Sbjct 878064 GNKGD 878050

Score = 45.1 bits (105), Expect = 2e-04, Method: Compositional matrix adjust.  
Identities = 33/64 (52%), Positives = 36/64 (56%), Gaps = 0/64 (0%)  
Frame = +3

Query 42 GIPGHPGHNGAPGRDGRDGTTPGEKGEKGDPLIGPKGDIGETGVPGAEGPRGFPIQGRK 101  
G G+ G G G G DGT GEKGEKG G G KGD GE G+ G G G G +G K  
Sbjct 298785 GEKGNKGDKGDVGVKDDGTKEKGEKGTGDKGNKGDKGEDGLKGENGDIGDKGDKGSK 298964

Query 102 GEPG 105  
GE G  
Sbjct 298965 GEDG 298976

Score = 44.7 bits (104), Expect = 3e-04, Method: Compositional matrix adjust.  
Identities = 29/70 (41%), Positives = 40/70 (57%), Gaps = 6/70 (9%)  
Frame = +1

Query 42 GIPGHPGHNGAPGRDG-----RDGTPGEKGEKGDPLIGPKGDIGETGVPGAEGPRGF 95  
GI G+ G G G +G G+ G+KGEKG+ G G KGD G G+ G +G +G  
Sbjct 239863 GIKGNKGDKGIKSEGDKGIKGESGSKGDKGEKGNKGYKGDKDKGNLGIKGDKDKGIK 240042

Query 96 GIQGRKGEPE 105  
G++G KG+ G  
Sbjct 240043 GVKGTGDKG 240072

Score = 44.3 bits (103), Expect = 3e-04, Method: Compositional matrix adjust.  
Identities = 28/69 (41%), Positives = 36/69 (52%), Gaps = 0/69 (0%)  
Frame = -3

Query 42 GIPGHPGHNGAPGRDGRDGTTPGEKGEKGDPLIGPKGDIGETGVPGAEGPRGFPIQGRK 101  
G G G+ G G +G G G+KG+ GD G G KGD G+ G G G +G G +G K  
Sbjct 878082 GDNGDKGNKGDKGDNGDKGNKGDKGDNGDKGNKGDKGDNGDKDNGDKDNGDKGDK 877903

Query 102 GEPGEGAYV 110  
GE G +  
Sbjct 877902 GESGSSCQI 877876

Score = 44.3 bits (103), Expect = 3e-04, Method: Compositional matrix adjust.  
Identities = 32/71 (45%), Positives = 41/71 (58%), Gaps = 6/71 (8%)  
Frame = +1

Query 42 GIPGHPGHNGAPGRDGRDGTTPGEKGE-----KGDPLIGPKGDIGETGVPGAEGPRGF 95  
GI G G NG G +G +GT G+KG+ KGD G G KGD G G G +G +G  
Sbjct 238198 GIKGDKGDNGTKGDNGDNGTKGDKGDNGIKGDKGDKGTGDKGDKGTGDKDNGDKGTGDN 238377

Query 96 GIQGRKGEPE 106  
GI+G KG+ G+  
Sbjct 238378 GIKGYKGDIGD 238410

Score = 44.3 bits (103), Expect = 3e-04, Method: Compositional matrix adjust.

Identities = 29/65 (45%), Positives = 36/65 (55%), Gaps = 0/65 (0%)  
Frame = +1

Query 42 GIPGHPGHNGAPGRDGRDGTTPGEKGEKGDPLIGPKGDIGETGVPGAEGPRGFPGIQGRK 101  
G G G G G G G GEKG +GD G G KG+ G+ G+ G+EG +G G G K  
Sbjct 239764 GDKGIKGDKNEGDKGDKGNKGEKGNRGDEGDKGIKGNKGDGKGIKSEGDGKIKGESGSK 239943

Query 102 GEPGE 106  
G+ GE  
Sbjct 239944 GDKGE 239958

Score = 44.3 bits (103), Expect = 4e-04, Method: Compositional matrix adjust.  
Identities = 30/65 (46%), Positives = 40/65 (62%), Gaps = 3/65 (5%)  
Frame = +3

Query 45 GHPGHNGAPGRDGRDGTTPGEKGEKGDPLIGPKGDI---GETGVPGAEGPRGFPGIQGRK 101  
G G G+ G DG G+ G+KGE G+ G G KGDI G+ G G +G +G PG++G K  
Sbjct 299001 GDKGDGKSGKEDGLKSGKGDGKGEIGNKGDGDKGDIGIKGDGDKGDKGDPGLKGEK 299180

Query 102 GEPGE 106  
GE G+  
Sbjct 299181 GEKGD 299195

Score = 43.9 bits (102), Expect = 4e-04, Method: Compositional matrix adjust.  
Identities = 28/65 (43%), Positives = 37/65 (57%), Gaps = 0/65 (0%)  
Frame = -3

Query 42 GIPGHPGHNGAPGRDGRDGTTPGEKGEKGDPLIGPKGDIGETGVPGAEGPRGFPGIQGRK 101  
G G G+ G G +G G G+KG KGD G G KGD G+ G G +G +G G +G K  
Sbjct 878163 GDNGDKGNKGDKGDNGDKGDKGDKGNKGDNGDKGNKGDKGDNGDKGNKGDKGDNGDKGNK 877984

Query 102 GEPGE 106  
G+ G+  
Sbjct 877983 GDKGD 877969

Score = 43.9 bits (102), Expect = 5e-04, Method: Compositional matrix adjust.  
Identities = 30/64 (47%), Positives = 37/64 (58%), Gaps = 0/64 (0%)  
Frame = -3

Query 42 GIPGHPGHNGAPGRDGRDGTTPGEKGEKGDPLIGPKGDIGETGVPGAEGPRGFPGIQGRK 101  
G G G+ G G G G G+KGEKG+ G +G KGDIG G G G +G GI+G K  
Sbjct 878775 GEKGDGRGNVGDGKGEKGDIGLKGDKGEKGEKGNVGDGKDIGTKGDKGNVGDGKDIGIKGEK 878596

Query 102 GEPG 105  
G+ G  
Sbjct 878595 GDIG 878584

Score = 43.9 bits (102), Expect = 5e-04, Method: Compositional matrix adjust.  
Identities = 29/65 (45%), Positives = 34/65 (52%), Gaps = 0/65 (0%)  
Frame = -3

Query 42 GIPGHPGHNGAPGRDGRDGTTPGEKGEKGDPLIGPKGDIGETGVPGAEGPRGFPGIQGRK 101  
G G G NG G G +G G KG+KGD G G KGD G+ G G +G G G G K  
Sbjct 878271 GNKGDKGDNGDKGDKGDKGDKGNKGDKGDNGDKGDKGDKGDKGDKGDKGDKGDKGDKGDKGDKGDK 878092



Query 102 GEPGE 106  
G G+  
Sbjct 878091 GNKGD 878077

Score = 43.9 bits (102), Expect = 5e-04, Method: Compositional matrix adjust.  
Identities = 31/68 (46%), Positives = 39/68 (57%), Gaps = 3/68 (4%)  
Frame = +1

Query 42 GIPGHPGHNGAPGRDG---RDGTPGEKGEKGDPLIGPKGDIGETGVPGAEGPRGFPGIQ 98  
GI G G G G +G +GT G+ G KGD G G KGDIG+ G+ G +G G GI+  
Sbjct 237784 GIKGDKGSEGIKGDNGIKGDNGTKGDNGTKGDNGTKGDKGDIGDNGIKGDKGDIGDNGIK 237963

Query 99 GRKGEPGE 106  
G KG G+  
Sbjct 237964 GDKGNKGD 237987

Score = 43.9 bits (102), Expect = 5e-04, Method: Compositional matrix adjust.  
Identities = 29/70 (41%), Positives = 41/70 (59%), Gaps = 0/70 (0%)  
Frame = +1

Query 37 TGWMAGIPGHPGHNGAPGRDGRDGTTPGEKGEKGDPLIGPKGDIGETGVPGAEGPRGFPG 96  
T + G+ G G++G+ G DG G G KGE G G +G KGD G G G++G +G G  
Sbjct 296380 TKGITGLKGTGKNSGSKGDDGDKGIQGLKGEFGTKGNVGDKGDGTGINGEKGSDGDKGNKG 296559

Query 97 IQGRKGEPGE 106  
+ G KG+ G+  
Sbjct 296560 LDGIKGDLDG 296589

Score = 43.5 bits (101), Expect = 6e-04, Method: Compositional matrix adjust.  
Identities = 28/60 (47%), Positives = 36/60 (60%), Gaps = 0/60 (0%)  
Frame = +1

Query 40 MAGIPGHPGHNGAPGRDGRDGTTPGEKGEKGDPLIGPKGDIGETGVPGAEGPRGFPGIQG 99  
+ G G+ G NG G G G G+KG KGD G IG KGDIG+ G+ G +G G G++G  
Sbjct 237958 IKGDKGNKGDNGDKGNKGDKGDIGDKGMKGDKGDIGDKGMKGDKGDIGDKGMKGD 238137

Score = 43.5 bits (101), Expect = 7e-04, Method: Compositional matrix adjust.  
Identities = 30/69 (43%), Positives = 39/69 (57%), Gaps = 0/69 (0%)  
Frame = +1

Query 42 GIPGHPGHNGAPGRDGRDGTTPGEKGEKGDPLIGPKGDIGETGVPGAEGPRGFPGIQGRK 101  
G G G NG+ G G G G KG KGD G G KGD+G+TG+ G++G +G G +G  
Sbjct 296701 GDKGSKGDNGSKGESGDKGIFGLKGSKGDIGDKGEKGDLDGDTGLKGSKGLKGSKGDGLV 296880

Query 102 GEPGEGAYV 110  
GE +V  
Sbjct 296881 NVKGENGFV 296907

Score = 43.5 bits (101), Expect = 7e-04, Method: Compositional matrix adjust.  
Identities = 34/68 (50%), Positives = 38/68 (56%), Gaps = 3/68 (4%)  
Frame = -1

Query 42 GIPGHPGHNGAPGRDGRDGTTPGEKGEKGDPLIGP---KGDIGETGVPGAEGPRGFPGIQ 98  
 GI G G G G G G GEKG KGD G IG KGDIG+ G G +G G GI+  
 Sbjct 885050 GIKGDIGDKGEKGDIGEKGDKGEKGIKGDKGDIGEKGNKGDIGDKGEKGDKIDGDKGIK 884871

Query 99 GRKGEPGE 106  
 G KG+ GE  
 Sbjct 884870 GDKGDIGE 884847

Score = 43.5 bits (101), Expect = 7e-04, Method: Compositional matrix adjust.  
 Identities = 23/46 (50%), Positives = 31/46 (67%), Gaps = 0/46 (0%)  
 Frame = +2

Query 57 GRDGTTPGEKGEKGDPLIGPKGDIGETGVPGAEGPRGFPGIQGRKG 102  
 G +G G KG+KGDGP+ G KG+ G G G++G +G PGI+G G  
 Sbjct 293120 GENGDKGNKGDKDPGIKGSKGEKGSKGDKGSKGDKDPGIKGESG 293257

Score = 43.1 bits (100), Expect = 8e-04, Method: Compositional matrix adjust.  
 Identities = 33/89 (37%), Positives = 41/89 (46%), Gaps = 6/89 (7%)  
 Frame = -3

Query 42 GIPGHPGHNGAPGRDGRDGTTPGEKGEKGDPLIGPKGDIGETGVPGAEGPRGFPGIQGRK 101  
 G G G G G G +G G KG+KGD G G KGD G+ G G +G G G G K  
 Sbjct 878091 GNKGDNGDKGNKGDKGDNGDKGNKGDKGDNGDKGNKGDKGDNGDKGDNGDKGDNGDK 877912

Query 102 GEPGEGAYVYRSFAFSVGLETYVTIPNMPI 130  
 G+ GE S S +E + M +  
 Sbjct 877911 GDKGE-----SGSSCQIENNDGVTIMSV 877843

Score = 43.1 bits (100), Expect = 9e-04, Method: Compositional matrix adjust.  
 Identities = 28/65 (43%), Positives = 36/65 (55%), Gaps = 0/65 (0%)  
 Frame = -3

Query 42 GIPGHPGHNGAPGRDGRDGTTPGEKGEKGDPLIGPKGDIGETGVPGAEGPRGFPGIQGRK 101  
 G G G+ G G G G G+KG+KGD G G KGD G+ G G +G G G +G K  
 Sbjct 878307 GNKGDKGNKGDKGNKGDKGDNGDKGDKGDNGDKGNKGDKGDNGDKGDKGDNGDKGNKGDK 878128

Query 102 GEPGE 106  
 G+ G+  
 Sbjct 878127 GDNGD 878113

Score = 42.7 bits (99), Expect = 0.001, Method: Compositional matrix adjust.  
 Identities = 32/74 (43%), Positives = 41/74 (55%), Gaps = 9/74 (12%)  
 Frame = -1

Query 42 GIPGHPGHNGAPGRDGRDGTTPGEKGE-----KGDPLIGPKGDIGETGVPGAEGPR 92  
 GI G G+ G G G DG+ G+KG+ KGD G+ G GD GE G G +G +  
 Sbjct 885167 GIDGKGNKGDGTGDKGIDGSKGDKGDTGNKGDIGDKGDQGIKGDIGDKGEKGDIGEKGDK 884988

Query 93 GFPGIQGRKGEPGE 106  
 G GI+G KG+ GE  
 Sbjct 884987 GEKGIKGDKGDIGE 884946

Score = 42.7 bits (99), Expect = 0.001, Method: Compositional matrix adjust.

Identities = 31/65 (48%), Positives = 36/65 (55%), Gaps = 0/65 (0%)  
Frame = -1

```
Query 42      GIPGHPGHNGAPGRDGRDGTTPGEKGEKGDPLIGPKGDIGETGVPGAEGPRGFPGIQGRK 101
                G G G G G G DG G KG+KGD G G KGDIGE G G +G +G G G K
Sbjct 884942  GNKGDIGDKGEKGDGDKGIDGDKGIKGDKGDIGEKGDKGDIGEKGDKGDIGEKGDKGDIGEKGDKGDIGEK 884763

Query 102     GEPGE 106
                G+ G+
Sbjct 884762  GDKGD 884748
```

Score = 42.7 bits (99), Expect = 0.001, Method: Compositional matrix adjust.  
Identities = 30/65 (46%), Positives = 38/65 (58%), Gaps = 0/65 (0%)  
Frame = +3

```
Query 42      GIPGHPGHNGAPGRDGRDGTTPGEKGEKGDPLIGPKGDIGETGVPGAEGPRGFPGIQGRK 101
                G G G +G G G G G+KG KG+ GL G KGD GE G G +G +G GI+G K
Sbjct 298947  GDKGSKGEDGLKGDKGDIGDKGDKGSKGEDGLKGSKGDKGEIGNKGDKGDIGIKGDK 299126

Query 102     GEPGE 106
                G+ G+
Sbjct 299127  GDIGD 299141
```

Score = 42.7 bits (99), Expect = 0.001, Method: Compositional matrix adjust.  
Identities = 32/68 (47%), Positives = 39/68 (57%), Gaps = 3/68 (4%)  
Frame = +1

```
Query 42      GIPGHPGHNGAPGRDGRDGTTPGEKGEKGD---PGLIGPKGDIGETGVPGAEGPRGFPGIQ 98
                G G G+NG G+ G +G G+ GEKGD G G KGDIGE G G +G G G +
Sbjct 238504  GSKGDKGYNGEIGQKGDNGEKGDNGEKGDNGEKGDGKGEKGDIGEKGDNKEKGDIGEKGDK 238683

Query 99      GRKGEPGE 106
                G KG+ GE
Sbjct 238684  GSKGDKGE 238707
```

Score = 42.7 bits (99), Expect = 0.001, Method: Compositional matrix adjust.  
Identities = 31/67 (46%), Positives = 37/67 (55%), Gaps = 3/67 (4%)  
Frame = -1

```
Query 40      MAGIPGHPGHNGAPGRDGRDGTTPGEKGEKGDPLIGPKGDIGETGVPGAEGPRGFPGIQG 99
                G G G G G G G GEKGEKGD G IG KGD G+ G +G +G PG +G
Sbjct 885650  AKGDKGDKGDIGEKGDKGDIGEKGDKGDIGEKGDKGDL---GEKGEKGDGPGQKG 885480

Query 100     RKGEPGE 106
                KG+ G+
Sbjct 885479  EKGDKGD 885459
```

Score = 42.7 bits (99), Expect = 0.001, Method: Compositional matrix adjust.  
Identities = 32/68 (47%), Positives = 38/68 (56%), Gaps = 3/68 (4%)  
Frame = -1

```
Query 42      GIPGHPGHNGAPGRDGRDGTTPGEKGEKGD---DPGLIGPKGDIGETGVPGAEGPRGFPGIQ 98
                GI G G G G G G G GEKG+KG D G+ G KGDIGE G G G +G G +
Sbjct 884978  GIKGDKGDIGEKGDKGIDGDKGEKGDGDKGIDGDKGIKGDKGDIGEKGDKGDIGEKGDKGDKIGEKGDKGDK 884799
```

Query 99 GRKGEPGE 106  
G KG+ G+  
Sbjct 884798 GDKGDKGD 884775

Score = 42.4 bits (98), Expect = 0.001, Method: Compositional matrix adjust.  
Identities = 28/65 (43%), Positives = 38/65 (58%), Gaps = 0/65 (0%)  
Frame = +1

Query 42 GIPGHPGHNGAPGRDGRDGTPEKGEKGDPLIGPKGDIGETGVPGAEGPRGFPGIQGRK 101  
G G G +G+ G G G G KG+KGD G +G KGD G+ G+ G +G +G G +G K  
Sbjct 239908 GDKGIKGESGSKGDKGEKGNKGYKGDGDKGNLGIKGDGDKGIKGVKGTGDKGTGKGVK 240087

Query 102 GEPGE 106  
G G+  
Sbjct 240088 GTKGD 240102

Score = 42.4 bits (98), Expect = 0.001, Method: Compositional matrix adjust.  
Identities = 32/70 (46%), Positives = 39/70 (56%), Gaps = 6/70 (9%)  
Frame = +1

Query 42 GIPGHPGHNGAPGRDGRDGTPEG---KGEKGDPLIGPKGDIGETGVPGAEGP---RGFP 95  
GI G G G G G GT G+ KG KGD G+ G KGDIG+ G+ G G +G  
Sbjct 238279 GIKGDGDKGTGDKGDKGTGKDNNGDKGTGKDNNGIKGYKGDIGDKGIKGESGANADKGDK 238458

Query 96 GIQGRKGEPE 105  
GI+G KG+ G  
Sbjct 238459 GIKGDGDKG 238488

Score = 42.4 bits (98), Expect = 0.002, Method: Compositional matrix adjust.  
Identities = 30/62 (48%), Positives = 34/62 (55%), Gaps = 0/62 (0%)  
Frame = -1

Query 45 GHPGHNGAPGRDGRDGTPEKGEKGDPLIGPKGDIGETGVPGAEGPRGFPGIQGRKGEPE 104  
G G G G G G PG+KGEKGD G G KGD G+ G G +G G G G KG+  
Sbjct 885545 GEKGDGKDLGEKGEKGDGQKGEKGDGDFGDKGDKDIGEKGDGDKDIGDKGEIGNKGDV 885366

Query 105 GE 106  
GE  
Sbjct 885365 GE 885360

Score = 42.0 bits (97), Expect = 0.002, Method: Compositional matrix adjust.  
Identities = 29/64 (45%), Positives = 36/64 (56%), Gaps = 0/64 (0%)  
Frame = +1

Query 40 MAGIPGHPGHNGAPGRDGRDGTPEKGEKGDPLIGPKGDIGETGVPGAEGPRGFPGIQG 99  
+ G PG+ G +G G +G G+ GE G KGD G G G G G G++G G GIQG  
Sbjct 296281 IKGDPGNKGEDGIKGTNGLKGSKGETGSKGDDGTKGITGLKGTGKNSGSKGDDGDKGIQG 296460

Query 100 RKGE 103  
KGE  
Sbjct 296461 LKGE 296472

Score = 42.0 bits (97), Expect = 0.002, Method: Compositional matrix adjust.  
Identities = 28/66 (42%), Positives = 34/66 (52%), Gaps = 0/66 (0%)  
Frame = +1

Query 40 MAGIPGHPGHNGAPGRDGRDGTTPGEKGEKGDPLIGPKGDIGETGVPGAEGPRGFPGIQG 99  
+ GI G G G PG G DG G G KG G G KGD G G+ G +G +G G +G  
Sbjct 296254 IKGIIGSKGIKGDGPNKGEDGIKGTNGLKGSKGETGSKGDDGTKGITGLKGTKGNSGSKG 296433

Query 100 RKGEPE 105  
G+ G  
Sbjct 296434 DDGDKG 296451

Score = 42.0 bits (97), Expect = 0.002, Method: Compositional matrix adjust.  
Identities = 31/64 (48%), Positives = 37/64 (58%), Gaps = 1/64 (2%)  
Frame = +1

Query 42 GIPGHPGHNGAPGRDGRDGTTPGEKGEKGDPLIGPKGDIGETGVPGAEGPRGFPGIQGRK 101  
GI G G NG+ G G GT G KG+KG G KG GETG G +G +G G +G K  
Sbjct 295984 GIKGMNGFNKSGIKGDKGTDGIKGDGKQDNF-GSKGQKGETGSKGDDGIKGITGSKGFK 296160

Query 102 GEPG 105  
G+PG  
Sbjct 296161 GDPG 296172

Score = 42.0 bits (97), Expect = 0.002, Method: Compositional matrix adjust.  
Identities = 27/65 (42%), Positives = 36/65 (55%), Gaps = 0/65 (0%)  
Frame = -3

Query 42 GIPGHPGHNGAPGRDGRDGTTPGEKGEKGDPLIGPKGDIGETGVPGAEGPRGFPGIQGRK 101  
G G G G G G +G G+KG+ GD G G KGD G+ G G +G +G G +G K  
Sbjct 878235 GDKDNGDKGNKGDGKDNKDKGDKDNGDKGNKGDGKDNKDKGDKGDKGDKGNK 878056

Query 102 GEPGE 106  
G+ G+  
Sbjct 878055 GDKGD 878041

Score = 42.0 bits (97), Expect = 0.002, Method: Compositional matrix adjust.  
Identities = 30/67 (45%), Positives = 36/67 (54%), Gaps = 0/67 (0%)  
Frame = -1

Query 40 MAGIPGHPGHNGAPGRDGRDGTTPGEKGEKGDPLIGPKGDIGETGVPGAEGPRGFPGIQG 99  
+ G G G G G G G GEKG KG+ G G KGDIGE G G G +G G +G  
Sbjct 884894 IDGDKGIKGDKGDIGEKGDIGEKGNKGEKGDGDKGDIGEKGDGDTGSKGDKGDKG 884715

Query 100 RKGEPE 106  
KG+ G+  
Sbjct 884714 EKGDKGD 884694

Score = 41.6 bits (96), Expect = 0.002, Method: Compositional matrix adjust.  
Identities = 28/62 (45%), Positives = 34/62 (55%), Gaps = 0/62 (0%)  
Frame = +2

Query 45 GHPGHNGAPGRDGRDGTTPGEKGEKGDPLIGPKGDIGETGVPGAEGPRGFPGIQGRKGEPE 104  
G G G+ G G G G KGEKG G G KGDIG G GA+ +G G +G KG+

Sbjct 293273 GDKGDKGSKGDKGDKGIDGNKGEKGSKGDGDKGDKDIGLKGESGADADKGDGDKGSKGDK 293452  
Query 105 GE 106  
G+  
Sbjct 293453 GD 293458

Score = 41.6 bits (96), Expect = 0.002, Method: Compositional matrix adjust.  
Identities = 28/66 (42%), Positives = 35/66 (53%), Gaps = 0/66 (0%)  
Frame = +2

Query 45 GHPGHNGAPGRDGRDGTPEKGEKGDPLIGPKGDIGETGVPGAEGPRGFPGIQGRKGEP 104  
G G +GA G G G KG+KGD G IGPKG+ G G +G +G G +G KG  
Sbjct 293381 GLKGESGADADKGDGDKGSKGDKGDKDIGPKGESGADADKGDGDKGSKGDKGDKGTK 293560

Query 105 GEGAYV 110  
GE +  
Sbjct 293561 GESGLI 293578

Score = 41.6 bits (96), Expect = 0.002, Method: Compositional matrix adjust.  
Identities = 28/60 (47%), Positives = 34/60 (57%), Gaps = 0/60 (0%)  
Frame = -1

Query 47 PGHNGAPGRDGRDGTPEKGEKGDPLIGPKGDIGETGVPGAEGPRGFPGIQGRKGEPGE 106  
G G G G DG G KG+ GD G+ G KGD G+TG G G +G GI+G G+ GE  
Sbjct 885197 KGEKGDGKNGKIDGEGKNGKGTGDKGIDGSKGDKGDTGNKGDIGDKGDQGIKGDIGDKGE 885018

Score = 41.6 bits (96), Expect = 0.003, Method: Compositional matrix adjust.  
Identities = 29/64 (45%), Positives = 35/64 (55%), Gaps = 0/64 (0%)  
Frame = +1

Query 42 GIPGHPGHNGAPGRDGRDGTPEKGEKGDPLIGPKGDIGETGVPGAEGPRGFPGIQGRK 101  
G+ G G +G G +G G G+KG KGD G G KGD G G G G GI+G K  
Sbjct 239701 GVKGDGKDSGIKGENGLKGDVGDGKIKGDKGNEGDKGDKGNKGEKGNRGDEGDKGIKGNK 239880

Query 102 GEPG 105  
G+ G  
Sbjct 239881 GDKG 239892

Score = 41.6 bits (96), Expect = 0.003, Method: Compositional matrix adjust.  
Identities = 27/65 (42%), Positives = 38/65 (58%), Gaps = 0/65 (0%)  
Frame = -3

Query 42 GIPGHPGHNGAPGRDGRDGTPEKGEKGDPLIGPKGDIGETGVPGAEGPRGFPGIQGRK 101  
G G G G+ G G G G+KG++GD G +G KG+ G+TG G G +G G +G K  
Sbjct 88518 GDQGDGKDTGSKGDQGDGDKGDQGDGDKGDVGDGKGNKGTGSKGDVGDGDKGDVGDGDKGDK 88339

Query 102 GEPGE 106  
G+ G+  
Sbjct 88338 GDTGD 88324

Score = 41.6 bits (96), Expect = 0.003, Method: Compositional matrix adjust.  
Identities = 28/65 (43%), Positives = 33/65 (51%), Gaps = 0/65 (0%)  
Frame = -3

Query 42 GIPGHPGHNGAPGRDGRDGTTPGEKGEKGDPLIGPKGDIGETGVPGAEGPRGFPGIQGRK 101  
G G G NG G G +G G KG+KGD G G GD G G G +G +G G G K  
Sbjct 878208 GNKGDKGDNGDKGDKGDNNGDKGNKGDKGDNGDKGDNNGDKGNKGDNGDKGNKGDKGDNGDK 878029

Query 102 GEPGE 106  
G G+  
Sbjct 878028 GNKGD 878014

Score = 41.6 bits (96), Expect = 0.003, Method: Compositional matrix adjust.  
Identities = 26/65 (40%), Positives = 35/65 (54%), Gaps = 0/65 (0%)  
Frame = -3

Query 42 GIPGHPGHNGAPGRDGRDGTTPGEKGEKGDPLIGPKGDIGETGVPGAEGPRGFPGIQGRK 101  
G G+ G G G G +G G+KG+ GD G G KGD G+ G G G +G G +G  
Sbjct 878298 GDKGNKGDKGNKGDKGDNGDKGDKGDNGDKGNKGDKGDNGDKGDKGDNGDKGNKGDKGD 878119

Query 102 GEPGE 106  
G+ G+  
Sbjct 878118 GDKGD 878104

Score = 41.6 bits (96), Expect = 0.003, Method: Compositional matrix adjust.  
Identities = 27/65 (42%), Positives = 36/65 (55%), Gaps = 0/65 (0%)  
Frame = +3

Query 42 GIPGHPGHNGAPGRDGRDGTTPGEKGEKGDPLIGPKGDIGETGVPGAEGPRGFPGIQGRK 101  
G+ G G G G G G G KG+KG+ GL G GDIG+ G G++G G G +G  
Sbjct 298821 GVKGDDGTKEKGEKGTGDKGNKGDKGEDGLKGENGDIGDKGDKGSKGEDGLKGDKGD 299000

Query 102 GEPGE 106  
G+ G+  
Sbjct 299001 GDKGD 299015

Score = 41.6 bits (96), Expect = 0.003, Method: Compositional matrix adjust.  
Identities = 27/65 (42%), Positives = 37/65 (57%), Gaps = 0/65 (0%)  
Frame = -3

Query 42 GIPGHPGHNGAPGRDGRDGTTPGEKGEKGDPLIGPKGDIGETGVPGAEGPRGFPGIQGRK 101  
G G G G G G G G+ G+KGD G +G KGD+G+ G G +G +G G +G K  
Sbjct 88347 GDKGDTGDKGDKGDTGDKGDKGDVGDKGDVGDVGDKGDVGDKGDVGDKGDVGDKGD 88168

Query 102 GEPGE 106  
G+ G+  
Sbjct 88167 GDIGD 88153

Score = 41.2 bits (95), Expect = 0.003, Method: Compositional matrix adjust.  
Identities = 27/65 (42%), Positives = 35/65 (54%), Gaps = 0/65 (0%)  
Frame = -3

Query 42 GIPGHPGHNGAPGRDGRDGTTPGEKGEKGDPLIGPKGDIGETGVPGAEGPRGFPGIQGRK 101  
G G+ G G G G +G G KG+ GD G G KGD G+ G G +G G G +G K  
Sbjct 878154 GDKGNKGDKGDNGDKGDNNGDKGNKGDNGDKGNKGDKGDNGDKGNKGDKGD 877975

Query 102 GEPGE 106

Sbjct 877974 G+ G+ GDKGD 877960

Score = 41.2 bits (95), Expect = 0.003, Method: Compositional matrix adjust.  
Identities = 26/65 (40%), Positives = 36/65 (55%), Gaps = 0/65 (0%)  
Frame = -3

Query 42 GIPGHPGHNGAPGRDGRDGTTPGEKGEKGDPLIGPKGDIGETGVPGAEGPRGFPGIQGRK 101  
G G G G G +G G +KG+ GD G G KG+ G+ G G +G +G G +G K  
Sbjct 878199 GDKGDNGDKGDKGDNKGNKGDKNKGDKNKGDKNKGDKNKGDKNKGDKNKGDKNKGDKNK 878020

Query 102 GEPGE 106  
G+ G+  
Sbjct 878019 GDKGD 878005

Score = 41.2 bits (95), Expect = 0.003, Method: Compositional matrix adjust.  
Identities = 28/61 (46%), Positives = 35/61 (57%), Gaps = 0/61 (0%)  
Frame = -1

Query 45 GHPGHNGAPGRDGRDGTTPGEKGEKGDPLIGPKGDIGETGVPGAEGPRGFPGIQGRKGEP 104  
G G G PG+ G G G+ G+KGD G IG KGD G+ G G G +G G +G KG+  
Sbjct 885518 GEKGEKGDPGQKGEKGDKDFGDKGDKDIGEKGDIGDKGEIGNKGDVGEKGSKGDK 885339

Query 105 G 105  
G  
Sbjct 885338 G 885336

Score = 41.2 bits (95), Expect = 0.004, Method: Compositional matrix adjust.  
Identities = 27/65 (42%), Positives = 34/65 (52%), Gaps = 0/65 (0%)  
Frame = -3

Query 42 GIPGHPGHNGAPGRDGRDGTTPGEKGEKGDPLIGPKGDIGETGVPGAEGPRGFPGIQGRK 101  
G G G G G G G +KG KGD G G KGD G+ G G +G +G G +G K  
Sbjct 878343 GDKGDKSDKGDKNKGDKNKGDKNKGDKNKGDKNKGDKNKGDKNKGDKNKGDKNKGDKNK 878164

Query 102 GEPGE 106  
G+ G+  
Sbjct 878163 GDNGD 878149

Score = 40.8 bits (94), Expect = 0.004, Method: Compositional matrix adjust.  
Identities = 29/65 (45%), Positives = 33/65 (51%), Gaps = 0/65 (0%)  
Frame = +1

Query 42 GIPGHPGHNGAPGRDGRDGTTPGEKGEKGDPLIGPKGDIGETGVPGAEGPRGFPGIQGRK 101  
G G G G G G G PG KGE G G G KG GETG G +G +G G++G K  
Sbjct 296233 GTKGDDGIKGIIGSKGIKGDGPNKGEDGIKGTNGLKGSKGETGSKGDDGTGKITGLKGTK 296412

Query 102 GEPGE 106  
G G  
Sbjct 296413 GNSGS 296427

Score = 40.8 bits (94), Expect = 0.004, Method: Compositional matrix adjust.  
Identities = 26/65 (40%), Positives = 36/65 (55%), Gaps = 0/65 (0%)



Frame = -3

Query 42 GIPGHPGHNGAPGRDGRDGTTPGEKGEKGDPLIGPKGDIGETGVPGAEGPRGFPGIQGRK 101  
G G+ G G G G G G+ G+KGD G G KG+ G+ G G +G +G G +G K  
Sbjct 878316 GDKGNKGDKNKGDKNKGDKNKGDKNKGDKNKGDKNKGDKNKGDKNKGDKNKGDKNK 878137

Query 102 GEPGE 106  
G+ G+  
Sbjct 878136 GDKGD 878122

Score = 40.8 bits (94), Expect = 0.005, Method: Compositional matrix adjust.  
Identities = 31/79 (39%), Positives = 40/79 (51%), Gaps = 12/79 (15%)  
Frame = +1

Query 40 MAGIPGHPGHNGAPGRDGRDGTTPGEKGEKGDPLIGPKGDIGETGVPGAEGPRGFPG--- 96  
+ GI G G G PG G +G G KG KG G +G KGD G G+ G++G +G PG  
Sbjct 296128 IKGITGSKGFKGDPGTKGENGINTKGLKGSQDLGTKGDDGIKGIIGSKGIKGDPGNKG 296307

Query 97 -----IQGRKGEPGE 106  
++G KGE G  
Sbjct 296308 EDGIKGTNGLKGSKGETGS 296364

Score = 40.8 bits (94), Expect = 0.005, Method: Compositional matrix adjust.  
Identities = 30/72 (42%), Positives = 41/72 (57%), Gaps = 1/72 (1%)  
Frame = -1

Query 42 GIPGHPGHNGAPGRDGRDGTTPGEKGEKGDPLIGPKGDIGETGVPGAEGPRGFPGIQGRK 101  
G+ G G G G G G G+KG++ D GL G KGD G+TG G +G +G G +G K  
Sbjct 883574 GVKGDKGDKNKGDKNKGNIGIKGDKGDRSDKGLKGDKGDKGDGTGDIKGLKGDIGEKGIK 883395

Query 102 GEPG-EGAYVYR 112  
G+ G G+ Y+  
Sbjct 883394 GDKGINGSKGYK 883359

Score = 40.8 bits (94), Expect = 0.005, Method: Compositional matrix adjust.  
Identities = 24/46 (52%), Positives = 30/46 (65%), Gaps = 0/46 (0%)  
Frame = -1

Query 60 GTPGEKGEKGDPLIGPKGDIGETGVPGAEGPRGFPGIQGRKGEPG 105  
G G+KG+ GD GL G KGDIGE G+ G +G G G +G KG+ G  
Sbjct 883475 GDKGDKGDGTGDIKGLKGDIGEKGIKGDKINGSKGYKGDKGDGK 883338

Score = 40.8 bits (94), Expect = 0.005, Method: Compositional matrix adjust.  
Identities = 30/64 (47%), Positives = 36/64 (56%), Gaps = 0/64 (0%)  
Frame = +3

Query 42 GIPGHPGHNGAPGRDGRDGTTPGEKGEKGDPLIGPKGDIGETGVPGAEGPRGFPGIQGRK 101  
G+ G G G G G G G KG KGD G IG KGD G+ G G +G +G G +G K  
Sbjct 298974 GLKGDKGDIGDKGDKGSKGEDGLKGSKGDKEIGNKGDKGDIGIKGDIGDKGDIGDKGDK 299153

Query 102 GEPG 105  
G+PG  
Sbjct 299154 GDPG 299165

Score = 40.8 bits (94), Expect = 0.005, Method: Compositional matrix adjust.  
Identities = 28/65 (43%), Positives = 35/65 (54%), Gaps = 0/65 (0%)  
Frame = +2

Query 42 GIPGHPGHNGAPGRDGRDGTTPGEKGEKGDPLIGPKGDIGETGVPGAEGPRGFPGIQGRK 101  
G G G G G G D G+KG+KG G G KGDIG G GA+ +G G +G K  
Sbjct 293354 GDKGDKDIGLKGESGADADKGDGDKGSKGDKGDKDIGPKGESGADADKGDGDKGSK 293533

Query 102 GEPGE 106  
G+ G+  
Sbjct 293534 GDKGD 293548

Score = 40.8 bits (94), Expect = 0.005, Method: Compositional matrix adjust.  
Identities = 31/65 (48%), Positives = 35/65 (54%), Gaps = 0/65 (0%)  
Frame = -1

Query 42 GIPGHPGHNGAPGRDGRDGTTPGEKGEKGDPLIGPKGDIGETGVPGAEGPRGFPGIQGRK 101  
G G G G G G G GEKGEKGDGP G KGD G+ G G +G G G +G  
Sbjct 885581 GEKGEKGDKGDIGEKGDGDLGEKGEKGDPGQKGEKGDKDFGDKGDKDIGEKGDGDI 885402

Query 102 GEPGE 106  
G+ GE  
Sbjct 885401 GDKGE 885387

Score = 40.8 bits (94), Expect = 0.005, Method: Compositional matrix adjust.  
Identities = 28/58 (48%), Positives = 32/58 (55%), Gaps = 0/58 (0%)  
Frame = -1

Query 42 GIPGHPGHNGAPGRDGRDGTTPGEKGEKGDPLIGPKGDIGETGVPGAEGPRGFPGIQG 99  
G PG G G G G G G+ GEKGD G IG KG+IG G G +G +G GI G  
Sbjct 885500 GDPGQKGEKGDKDFGDKGDKGDIGEKGDKGDIGDKGEIGNKGDVGEKGSKGDKGIDG 885327

Score = 40.8 bits (94), Expect = 0.005, Method: Compositional matrix adjust.  
Identities = 29/65 (45%), Positives = 33/65 (51%), Gaps = 0/65 (0%)  
Frame = -1

Query 42 GIPGHPGHNGAPGRDGRDGTTPGEKGEKGDPLIGPKGDIGETGVPGAEGPRGFPGIQGRK 101  
G G G G G G G G+KG KGD G G KGDIG G G G +G G G K  
Sbjct 883997 GSKGEKGDTEKGDGKGNKGRDGDGKIGKDIGSKGDKGDIGNKGDKGRDGDGKIGKDAGLK 883818

Query 102 GEPGE 106  
G+ G+  
Sbjct 883817 GDKGD 883803

Score = 40.4 bits (93), Expect = 0.005, Method: Compositional matrix adjust.  
Identities = 29/63 (46%), Positives = 34/63 (54%), Gaps = 0/63 (0%)  
Frame = -1

Query 40 MAGIPGHPGHNGAPGRDGRDGTTPGEKGEKGDPLIGPKGDIGETGVPGAEGPRGFPGIQG 99  
+ G G G G G G G G+KG KGD GL G KGDIG+ G G +G RG G +G  
Sbjct 883922 IKGDIGSKGDKGDIGNKGDKGRDGDGKIGKDAGLKGDKGDIGQKGDGKTKGDRGDKGEK 883743

Query 100 RKG 102

G  
Sbjct 883742 DAG 883734

Score = 40.4 bits (93), Expect = 0.006, Method: Compositional matrix adjust.  
Identities = 29/69 (42%), Positives = 38/69 (55%), Gaps = 3/69 (4%)  
Frame = -1

Query 41 AGIPGHPGHNGAPGRDGRDGTTPGEK---GEKGDPLIGPKGDIGETGVPGAEGPRGFPGI 97  
AG+ G+ G G G G G G+K G++GD G IG KGD G+ G G G +G G  
Sbjct 883739 AGLKGNKGDIGLKGDKGTGDRGDKGTGDRGDKDIGNKGDKGDGDKGTGDRGDKGVKGD 883560

Query 98 QGRKGEPGE 106  
+G KG G+  
Sbjct 883559 KGDKGNKGD 883533

Score = 40.4 bits (93), Expect = 0.006, Method: Compositional matrix adjust.  
Identities = 26/65 (40%), Positives = 34/65 (52%), Gaps = 0/65 (0%)  
Frame = -3

Query 42 GIPGHPGHNGAPGRDGRDGTTPGEKGEKGDPLIGPKGDIGETGVPGAEGPRGFPGIQGRK 101  
G G G NG G +G G G+ G+KG+ G G GD G G G +G G +G K  
Sbjct 878145 GNKGDKGDNGDKDNGDKGNKGDNGDKGNKGDKGDNGDKGNKGDKGDNGDKGNKGDKGDK 877966

Query 102 GEPGE 106  
G+ G+  
Sbjct 877965 GDNGD 877951

Score = 40.4 bits (93), Expect = 0.006, Method: Compositional matrix adjust.  
Identities = 27/65 (42%), Positives = 37/65 (57%), Gaps = 0/65 (0%)  
Frame = -3

Query 42 GIPGHPGHNGAPGRDGRDGTTPGEKGEKGDPLIGPKGDIGETGVPGAEGPRGFPGIQGRK 101  
G G G G G G G G+KG+ GD G +G KGD+G+ G G +G +G G +G K  
Sbjct 87798 GDTGDKGDTGDKGDTGDKGDTGDKGDVGDKGDVGDKGDVGDKGDVGDKGDIGDKGDK 87619

Query 102 GEPGE 106  
G+ G+  
Sbjct 87618 GDLGD 87604

Score = 40.4 bits (93), Expect = 0.006, Method: Compositional matrix adjust.  
Identities = 28/65 (43%), Positives = 36/65 (55%), Gaps = 0/65 (0%)  
Frame = +1

Query 42 GIPGHPGHNGAPGRDGRDGTTPGEKGEKGDPLIGPKGDIGETGVPGAEGPRGFPGIQGRK 101  
G G+ G G G G G+ G+KG KGD G G KG+ GE G G +G +G G +G K  
Sbjct 239458 GSKGYKGDKGDKGIKGNKTSKGDKSKGDKGEKGSKGNKGEKGEKGFKEKGSKGEKGSK 239637

Query 102 GEPGE 106  
G G+  
Sbjct 239638 GNKGD 239652

Score = 40.4 bits (93), Expect = 0.006, Method: Compositional matrix adjust.  
Identities = 28/65 (43%), Positives = 36/65 (55%), Gaps = 0/65 (0%)

Frame = -1

Query 42 GIPGHPGHNGAPGRDGRDGTTPGEKGEKGDPLIGPKGDIGETGVPGAEGPRGFPGIQGRK 101  
G G G+ G G G G G+KG KGD G G KGD G G+ G +G R G++G K  
Sbjct 883646 GDKGDIGNKGDKGDGKGTGDRGDKGVKGDKGDKNKGDKNIGIKGDKGDRSDKGLKGDK 883467

Query 102 GEPGE 106  
G+ G+  
Sbjct 883466 GDKGD 883452

Score = 40.4 bits (93), Expect = 0.007, Method: Compositional matrix adjust.  
Identities = 27/64 (42%), Positives = 34/64 (53%), Gaps = 0/64 (0%)  
Frame = -3

Query 42 GIPGHPGHNGAPGRDGRDGTTPGEKGEKGDPLIGPKGDIGETGVPGAEGPRGFPGIQGRK 101  
G G+ G G G G G G+KG KGD G G KGD G+ G G +G +G G +G  
Sbjct 878280 GDKGNKGDKGDNGDKGDKGDNKGNKGDKGDNGDKGDKGDNKGNKGDKGDNGDKGDN 878101

Query 102 GEPG 105  
G+ G  
Sbjct 878100 GDKG 878089

Score = 40.4 bits (93), Expect = 0.007, Method: Compositional matrix adjust.  
Identities = 29/67 (43%), Positives = 36/67 (54%), Gaps = 3/67 (4%)  
Frame = +1

Query 42 GIPGHPGH---NGAPGRDGRDGTTPGEKGEKGDPLIGPKGDIGETGVPGAEGPRGFPGIQ 98  
GI G G G G G G G+KG KGD G G KG+ G+ G G +G +G GI+  
Sbjct 239143 GIKGESGSAVFKGDGKGTGDKGNKGDKNKGDKGTNGDKGNKGDKGSKGDGKGTGDKGIK 239322

Query 99 GRKGEPG 105  
G KG+ G  
Sbjct 239323 GDKGDKG 239343

Score = 40.4 bits (93), Expect = 0.007, Method: Compositional matrix adjust.  
Identities = 28/62 (45%), Positives = 35/62 (56%), Gaps = 0/62 (0%)  
Frame = +2

Query 45 GHPGHNGAPGRDGRDGTTPGEKGEKGDPLIGPKGDIGETGVPGAEGPRGFPGIQGRKGEP 104  
G G+ G G G G+ GEKG KGD G G KGD G G GA+ +G G +G KG+  
Sbjct 293129 GDKGNKGDKGDPIKGSKGEKGSKGDKGSKGDKGDPIKGESGADADKGDKGDKGSKGDK 293308

Query 105 GE 106  
G+  
Sbjct 293309 GD 293314

Score = 40.0 bits (92), Expect = 0.007, Method: Compositional matrix adjust.  
Identities = 28/67 (42%), Positives = 37/67 (55%), Gaps = 3/67 (4%)  
Frame = +1

Query 43 IPGHPGHNGAPGRDGRDGTTPGEKGE---KGDPLIGPKGDIGETGVPGAEGPRGFPGIQG 99  
G G NG G G +G G+KG+ KGD G G KGD G+ G+ G +G +G G +G  
Sbjct 238147 TKGDKGDNGTKGDKGDNGIKGDKGDNGTKGDNGDNGTKGDKGDNGIKGDKGDGKGTGDKG 238326

Query 100 RKGEPGE 106  
KG G+  
Sbjct 238327 DKGTKGD 238347

Score = 40.0 bits (92), Expect = 0.008, Method: Compositional matrix adjust.  
Identities = 28/64 (44%), Positives = 34/64 (53%), Gaps = 0/64 (0%)  
Frame = +1

Query 42 GIPGHPGHNGAPGRDGRDGTTPGEKGEKGDPLIGPKGDIGETGVPGAEGPRGFPGIQGRK 101  
G G G G G G G GEKG KG+ G G KGD G+ G G G +G G++G K  
Sbjct 239539 GDKGEKGSKGNKGEKGEKGFKEKGSKGEKGSKGNKGDGDKGFKGDNGIKGNIGVKGDK 239718

Query 102 GEPG 105  
G+ G  
Sbjct 239719 GDSG 239730

Score = 40.0 bits (92), Expect = 0.008, Method: Compositional matrix adjust.  
Identities = 22/40 (55%), Positives = 28/40 (70%), Gaps = 0/40 (0%)  
Frame = +3

Query 63 GEKGEKGDPLIGPKGDIGETGVPGAEGPRGFPGIQGRKG 102  
G KG KGD G G KGD+G+TG+ G +G +G PGI+G G  
Sbjct 299757 GTKGVKGDKGSKGDGLDGTGIKGDKGEKGDPIKGEAG 299876

Score = 40.0 bits (92), Expect = 0.009, Method: Compositional matrix adjust.  
Identities = 27/65 (42%), Positives = 35/65 (54%), Gaps = 0/65 (0%)  
Frame = +1

Query 42 GIPGHPGHNGAPGRDGRDGTTPGEKGEKGDPLIGPKGDIGETGVPGAEGPRGFPGIQGRK 101  
G G G G G G G G KG+KG+ G G KG+ GE G G +G +G G +G K  
Sbjct 239467 GYKGDKGDKGIKNTGSKGDKGSKGDKGEKGSKGNKGEKGEKGFKEKGSKGEKGSKGNK 239646

Query 102 GEPGE 106  
G+ G+  
Sbjct 239647 GDKGD 239661

Score = 40.0 bits (92), Expect = 0.009, Method: Compositional matrix adjust.  
Identities = 29/68 (43%), Positives = 36/68 (53%), Gaps = 3/68 (4%)  
Frame = +2

Query 42 GIPGHPGHNGAPGRDGRDGTTPGEKGEKGDPLIGPKGD---IGETGVPGAEGPRGFPGIQ 98  
G G G G G G D G+KGEKGD G+ G KGD G+TG+ G G G +  
Sbjct 294137 GEKGEKGDVGIKGESGADADKGDKGEKGDKGVNGDKGDKGSKGDTGIKGEAGTAANKGDK 294316

Query 99 GRKGEPEGE 106  
G KG+ G+  
Sbjct 294317 GSKGDKGD 294340

Score = 40.0 bits (92), Expect = 0.009, Method: Compositional matrix adjust.  
Identities = 27/64 (42%), Positives = 33/64 (52%), Gaps = 0/64 (0%)  
Frame = -3

Query 42 GIPGHPGHNGAPGRDGRDGTTPGEKGEKGDPLIGPKGDIGETGVPGAEGPRGFPGIQGRK 101

Sbjct 878217 G G+ G G G G G G+KG KGD G G KGD G+ G G G +G G +G  
 GDKGNKGDKGDNGDKGDKGDNGDKGNKGDKGDNGDKGNKGDNGDKGNKGDNGDKGNKGDKGDN 878038

Query 102 GEPG 105  
 G+ G

Sbjct 878037 GDKG 878026

Score = 39.7 bits (91), Expect = 0.010, Method: Compositional matrix adjust.  
 Identities = 29/64 (45%), Positives = 35/64 (55%), Gaps = 0/64 (0%)  
 Frame = -3

Query 42 GIPGHPGHNGAPGRDGRDGTTPGEKGEKGDPLIGPKGDIGETGVPGAEGPRGFPGIQGRK 101  
 G G G G G G G G KG+KGD G IG KG+IG G G +G +G G +G K

Sbjct 878631 GDKGDIGIKGEKGDIGTKGDIGNKGDKGDIGNKGNIGNKGEKGDKGVKGDIGEKGEK 878452

Query 102 GEPG 105  
 G+ G

Sbjct 878451 GDKG 878440

Score = 39.7 bits (91), Expect = 0.010, Method: Compositional matrix adjust.  
 Identities = 30/65 (46%), Positives = 35/65 (54%), Gaps = 0/65 (0%)  
 Frame = -1

Query 42 GIPGHPGHNGAPGRDGRDGTTPGEKGEKGDPLIGPKGDIGETGVPGAEGPRGFPGIQGRK 101  
 GI G G G G G G G G++G KGD G G KGDIGE G G +G +G G G K

Sbjct 885122 GIDGSKGDKGDTGNKGDIGDKGDQGIKGDIGDKGEKGDIGEKGDKGEKGIKGDKGDIGEK 884943

Query 102 GEPGE 106  
 G G+

Sbjct 884942 GNKGD 884928

Score = 39.7 bits (91), Expect = 0.010, Method: Compositional matrix adjust.  
 Identities = 28/64 (44%), Positives = 36/64 (56%), Gaps = 0/64 (0%)  
 Frame = +1

Query 42 GIPGHPGHNGAPGRDGRDGTTPGEKGEKGDPLIGPKGDIGETGVPGAEGPRGFPGIQGRK 101  
 G G+ G+ G G G G G+KG+KG G+ G KGD G GV G +G +G G G K

Sbjct 239953 GEKGNKGYKGDKGDKNLGIKGDKDKGIKGVKGTGDKGTGKGVKGTGDKDKGDKGTNGDK 240132

Query 102 GEPG 105  
 G+ G

Sbjct 240133 GDKG 240144

Score = 39.7 bits (91), Expect = 0.011, Method: Compositional matrix adjust.  
 Identities = 30/64 (47%), Positives = 33/64 (52%), Gaps = 3/64 (5%)  
 Frame = -1

Query 43 IPGHPGHNGAPGRDGRDGTTPGEKGEKGDPLIGPKGDIGETGVPGAEGPRGFPGIQGRKG 102  
 I G G G G G G GT GEKGD G G KGD GE G G +G RG GI+G G

Sbjct 884075 IKGDKGEKGDKNAGDKGTS---GEKGDLSKGEKGDTEKGDKNKGDGRGDKGIKGDIG 883905

Query 103 EPGE 106  
 G+

Sbjct 883904 SKGD 883893

Score = 39.7 bits (91), Expect = 0.011, Method: Compositional matrix adjust.  
Identities = 27/65 (42%), Positives = 35/65 (54%), Gaps = 0/65 (0%)  
Frame = -3

Query 42 GIPGHPGHNGAPGRDGRDGTTPGEKGEKGDPLIGPKGDIGETGVPGAEGPRGFPGIQGRK 101  
G G G G G G G G+KG+ GD G +G KGD+G+ G G G +G G G K  
Sbjct 88329 GDKGDKGDTGDKGDKGDVGDGDKGDVGDGDKGDVGDGDKGDKGDTGDKGDKGDIGDK 88150

Query 102 GEPGE 106  
G+ G+  
Sbjct 88149 GDKGD 88135

Score = 39.7 bits (91), Expect = 0.011, Method: Compositional matrix adjust.  
Identities = 26/65 (40%), Positives = 33/65 (51%), Gaps = 0/65 (0%)  
Frame = -3

Query 42 GIPGHPGHNGAPGRDGRDGTTPGEKGEKGDPLIGPKGDIGETGVPGAEGPRGFPGIQGRK 101  
G G+ G G G G G+KG KGD G G KGD G+ G G G +G G +G  
Sbjct 878361 GDKGNKGDKGDKSDKGDKNKGDKNKGDKNKGDKNKGDKNKGDKNKGDKNKGDKNKGDKN 878182

Query 102 GEPGE 106  
G+ G+  
Sbjct 878181 GDKGD 878167

Score = 39.7 bits (91), Expect = 0.012, Method: Compositional matrix adjust.  
Identities = 26/64 (41%), Positives = 35/64 (55%), Gaps = 0/64 (0%)  
Frame = -3

Query 43 IPGHPGHNGAPGRDGRDGTTPGEKGEKGDPLIGPKGDIGETGVPGAEGPRGFPGIQGRKG 102  
I G G G G G G G+KG++GD G G KGD+G+ G G G +G G +G G  
Sbjct 88533 IKGEKGDQGDKGDTSKGDQGDKGDQGDKGDQGDKGDVGDGKNKGDTSKGDVGDGKGDV 88354

Query 103 EPGE 106  
+ G+  
Sbjct 88353 DKGD 88342

Score = 39.7 bits (91), Expect = 0.012, Method: Compositional matrix adjust.  
Identities = 27/62 (44%), Positives = 36/62 (58%), Gaps = 0/62 (0%)  
Frame = -3

Query 45 GHPGHNGAPGRDGRDGTTPGEKGEKGDPLIGPKGDIGETGVPGAEGPRGFPGIQGRKGEP 104  
G G++G G G G G+KG KG G G KGD G+ G G++G +G GI+G KG  
Sbjct 879144 GDKGNDGIKGDGFSKGYKGDGSKGTKGNNGFKGDRGDKGDKGSKGDKGDNIGKGNKGSK 878965

Query 105 GE 106  
G+  
Sbjct 878964 GD 878959

Score = 39.7 bits (91), Expect = 0.013, Method: Compositional matrix adjust.  
Identities = 27/67 (40%), Positives = 33/67 (49%), Gaps = 0/67 (0%)  
Frame = -3

Query 40 MAGIPGHPGHNGAPGRDGRDGTTPGEKGEKGDPLIGPKGDIGETGVPGAEGPRGFPGIQQ 99  
 + G G G G G DG G G KG+KG G G KGD+G G G +G G G +G  
 Sbjct 879348 LKGEKGEIGSKGTKGDDGNKGNKGIKGDKGTGDKGDKGDVGNKGDAGDKGDAGKKGEK 879169

Query 100 RKGEPGE 106  
 G G+  
 Sbjct 879168 EMGNKGD 879148

Score = 39.3 bits (90), Expect = 0.013, Method: Compositional matrix adjust.  
 Identities = 26/65 (40%), Positives = 33/65 (51%), Gaps = 0/65 (0%)  
 Frame = -3

Query 42 GIPGHPGHNGAPGRDGRDGTTPGEKGEKGDPLIGPKGDIGETGVPGAEGPRGFPGIQRK 101  
 G G G G G +G G G+KG+ GD G G GD G G G +G G +G K  
 Sbjct 878262 GDKGDNGDKGDKGDNGDKGNKGDKGDNGDKGDKGDNGDKGNKGDKGDNGDKGDKGNK 878083

Query 102 GEPGE 106  
 G+ G+  
 Sbjct 878082 GDNGD 878068

Score = 39.3 bits (90), Expect = 0.013, Method: Compositional matrix adjust.  
 Identities = 27/65 (42%), Positives = 34/65 (52%), Gaps = 0/65 (0%)  
 Frame = -3

Query 42 GIPGHPGHNGAPGRDGRDGTTPGEKGEKGDPLIGPKGDIGETGVPGAEGPRGFPGIQRK 101  
 G G G G G G G G+ G+KGD G G KGD G+ G G +G G G +G K  
 Sbjct 878190 GDNGDKGDKGDNGDKGNKGDKGDNGDKGDKGDNGDKGNKGDKGDNGDKGNKGDK 878011

Query 102 GEPGE 106  
 G+ G+  
 Sbjct 878010 GDNGD 877996

Score = 39.3 bits (90), Expect = 0.013, Method: Compositional matrix adjust.  
 Identities = 30/65 (46%), Positives = 35/65 (54%), Gaps = 0/65 (0%)  
 Frame = +3

Query 42 GIPGHPGHNGAPGRDGRDGTTPGEKGEKGDPLIGPKGDIGETGVPGAEGPRGFPGIQRK 101  
 G G G NG G G G+ GE G KGD G IG KGD G G G +G +G G G K  
 Sbjct 298902 GEDGLKGENGDIGDKGDKGSKGEDGLKGDKGDIGDKGDKGSKGEDGLKGSKGDKGEIGNK 299081

Query 102 GEPGE 106  
 G+ G+  
 Sbjct 299082 GDKGD 299096

Score = 39.3 bits (90), Expect = 0.013, Method: Compositional matrix adjust.  
 Identities = 29/65 (45%), Positives = 36/65 (55%), Gaps = 0/65 (0%)  
 Frame = -1

Query 42 GIPGHPGHNGAPGRDGRDGTTPGEKGEKGDPLIGPKGDIGETGVPGAEGPRGFPGIQRK 101  
 G G+ G G G G G G+KG KGD G IG KGD G+ G G +G +G G +G  
 Sbjct 884951 GEKGNKGDIGDKGEKGDKIDGDKGIKGDKGDIGEKGDKGDIGEKGNKGEKGDKGDKGD 884772

Query 102 GEPGE 106  
 GE G+



Sbjct 884771 GEKGD 884757

Score = 39.3 bits (90), Expect = 0.014, Method: Compositional matrix adjust.  
Identities = 26/63 (41%), Positives = 33/63 (52%), Gaps = 0/63 (0%)  
Frame = +1

Query 40 MAGIPGHPGHNGAPGRDGRDGTPEKEKGEKGDPLIGPKGDIGETGVPGAEGPRGFPGIQG 99  
+ G G G G+ G G G+ G KGEKG+ G G KG GE G G +G +G G +G  
Sbjct 239497 IKGNTGSKGDKGSKGDKGEKGSKGNKGEKGEKGFKEKGSKGEKGSKGNKGDGDKGDKGFKG 239676

Query 100 RKG 102  
G  
Sbjct 239677 DNG 239685

Score = 39.3 bits (90), Expect = 0.015, Method: Compositional matrix adjust.  
Identities = 28/64 (44%), Positives = 33/64 (52%), Gaps = 0/64 (0%)  
Frame = -3

Query 42 GIPGHPGHNGAPGRDGRDGTPEKEKGEKGDPLIGPKGDIGETGVPGAEGPRGFPGIQGRK 101  
G G G+ G G G GT G+KG+KGD G G GD G+ G G +G G G G K  
Sbjct 879315 GTKGDDGNKGNKGIKGDKGTGDKGDKGDVGNKGDAGDKGDAGKKGEKGEKGMGNKGDIGDK 879136

Query 102 GEPG 105  
G G  
Sbjct 879135 GNDG 879124

Score = 39.3 bits (90), Expect = 0.015, Method: Compositional matrix adjust.  
Identities = 27/64 (42%), Positives = 34/64 (53%), Gaps = 0/64 (0%)  
Frame = -3

Query 42 GIPGHPGHNGAPGRDGRDGTPEKEKGEKGDPLIGPKGDIGETGVPGAEGPRGFPGIQGRK 101  
G G G G G G G G+ G+KG+ G +G KGDIG+ G G +G G G +G K  
Sbjct 879261 GTTGDKGDKGDVGNKGDAGDKGDAGKKGEKGEKGMGNKGDIGDKGNDGIKGDGFSKGYKGDK 879082

Query 102 GEPG 105  
G G  
Sbjct 879081 GSKG 879070

Score = 39.3 bits (90), Expect = 0.015, Method: Compositional matrix adjust.  
Identities = 30/67 (45%), Positives = 37/67 (55%), Gaps = 3/67 (4%)  
Frame = +1

Query 47 PGHNGAPGRDGRDGTPEKEKGEKGDPLIGPKGDIGETGV---PGAEGPRGFPGIQGRKGE 103  
G NG G G G+ G+KGE GD G IG KGD G GV G +G +GF G G KG+  
Sbjct 296887 KGENGFVGDLSKSGSKGDKGESDGDIGIKGDKGAKGVTGDKGDKGTGKGFIGNVGFKGD 297066

Query 104 PGEYAYV 110  
G+ +  
Sbjct 297067 TGDKGII 297087

Score = 39.3 bits (90), Expect = 0.016, Method: Compositional matrix adjust.  
Identities = 32/68 (47%), Positives = 36/68 (53%), Gaps = 3/68 (4%)  
Frame = -1

Query 42 GIPGHPGHNGAPGRDGRDGTTPGEKGEKGD---PGLIGPKGDIGETGVPGAEGPRGFPGIQ 98  
 G G G G G G G GEKG+KGD G G KGDIGE G G G +G G  
 Sbjct 885671 GESGEKGAKGDKGDKDIGEKGEKGDGDKDIGEKGEKGDGDKDIGEKGDGDLGEKGEKGD 885492

Query 99 GRKGEPEGE 106  
 G+KGE G+  
 Sbjct 885491 GQKGEKGD 885468

Score = 39.3 bits (90), Expect = 0.016, Method: Compositional matrix adjust.  
 Identities = 28/64 (44%), Positives = 34/64 (53%), Gaps = 0/64 (0%)  
 Frame = +1

Query 42 GIPGHPGHNGAPGRDGRDGTTPGEKGEKGD PGLIGPKGDIGETGVPGAEGPRGFPGIQGRK 101  
 G G G G+ G G G G KG+KG+ G G KGDIG G+ G G F G +G K  
 Sbjct 239017 GDKGSKGDKGSKGDKGDKGDEGIKGDKNKGDKGDKDIGSQGIKGESGSAVFKGDKGTK 239196

Query 102 GEPG 105  
 G+ G  
 Sbjct 239197 GDKG 239208

Score = 38.9 bits (89), Expect = 0.018, Method: Compositional matrix adjust.  
 Identities = 27/65 (42%), Positives = 35/65 (54%), Gaps = 0/65 (0%)  
 Frame = -3

Query 42 GIPGHPGHNGAPGRDGRDGTTPGEKGEKGD PGLIGPKGDIGETGVPGAEGPRGFPGIQGRK 101  
 G G G G G G G G+KG+ GD G +G KGD+G+ G G G +G G G K  
 Sbjct 87780 GDTGDKGDTGDKGDTGDKGDVGDGDKGDVGDGDKGDVGDGDKGDIGDKGDKDLGDK 87601

Query 102 GEPGE 106  
 G+ G+  
 Sbjct 87600 GDKGD 87586

Score = 38.9 bits (89), Expect = 0.018, Method: Compositional matrix adjust.  
 Identities = 24/56 (43%), Positives = 33/56 (59%), Gaps = 6/56 (11%)  
 Frame = +1

Query 60 GTPGEKGEKGD PGLIGPKGDIGETGVPGAEGPRGFPGIQGRKGEPEGAYVYRSAF 115  
 GT G KGEKG G +GPKG+ G+ G G++G R G KGEPE + Y +++  
 Sbjct 291823 GTGGCKGEKGIKGE LGPKGNTGQKGDIGSKGDR-----GDKGEPTISMFSYINSY 291972

Score = 38.9 bits (89), Expect = 0.019, Method: Compositional matrix adjust.  
 Identities = 27/65 (42%), Positives = 35/65 (54%), Gaps = 0/65 (0%)  
 Frame = -3

Query 42 GIPGHPGHNGAPGRDGRDGTTPGEKGEKGD PGLIGPKGDIGETGVPGAEGPRGFPGIQGRK 101  
 G G G G G G G G+ G+KGD G +G KGD G+ G G G +G G +G K  
 Sbjct 88374 GDKGDVGDGDKGDKGDTGDKGDKGDTGDKGDKGDVGDGDKGDVGDGDKGDVGDGDKGD 88195

Query 102 GEPGE 106  
 G+ G+  
 Sbjct 88194 GDTGD 88180

Score = 38.9 bits (89), Expect = 0.019, Method: Compositional matrix adjust.  
Identities = 29/70 (41%), Positives = 37/70 (53%), Gaps = 3/70 (4%)  
Frame = -1

Query 40 MAGIPGHPGHNGAPGRDGRDGTTPGEKGEKGDPLG---IGPKGDIGETGVPGAEGPRGFPG 96  
+G G G G G G G G KG++GD G+ IG KGD G+ G G +G RG G  
Sbjct 884021 TSGEKGDLSKGEKGDTEKGDKNKGDGRDGIKGDIGSKGDKGDIGNKGDKGDRGDKG 883842

Query 97 IQGRKGEPE 106  
I+G G G+  
Sbjct 883841 IKGDAGLKGD 883812

Score = 38.9 bits (89), Expect = 0.019, Method: Compositional matrix adjust.  
Identities = 29/65 (45%), Positives = 33/65 (51%), Gaps = 0/65 (0%)  
Frame = +3

Query 42 GIPGHPGHNGAPGRDGRDGTTPGEKGEKGDPLGIGPKGDIGETGVPGAEGPRGFPGIQGRK 101  
G G G G G G G GE G KG+ G IG KGD G G G +G +G G +G K  
Sbjct 298839 GTKGEKGEKGTGDKGNKGDGEDGLKGENGDIGDKGDKGSKGEDGLKGDKGDIKDKGDK 299018

Query 102 GEPGE 106  
G GE  
Sbjct 299019 GSKGE 299033

Score = 38.9 bits (89), Expect = 0.020, Method: Compositional matrix adjust.  
Identities = 31/68 (46%), Positives = 37/68 (54%), Gaps = 3/68 (4%)  
Frame = -1

Query 42 GIPGHPGHNGAPGRDGRDGTTPGEKGEKGDPLGIGPKGDIGETGVV---GAEGPRGFPGIQ 98  
G G G G G G G GEKG+KG+ G+ G KGDIGE G G +G +G GI  
Sbjct 885068 GDKGDQGIKGDIGDKGEKGDIGEKGDKEKGIKGDIGEKGNKGDIGDKGEKGDKGID 884889

Query 99 GRKGEPE 106  
G KG G+  
Sbjct 884888 GDKGIKGD 884865

Score = 38.9 bits (89), Expect = 0.020, Method: Compositional matrix adjust.  
Identities = 28/64 (44%), Positives = 34/64 (53%), Gaps = 0/64 (0%)  
Frame = +2

Query 42 GIPGHPGHNGAPGRDGRDGTTPGEKGEKGDPLGIGPKGDIGETGVPGAEGPRGFPGIQGRK 101  
G G G G G DG G G KG+KGD G IG KG+ G G +G +G G +G K  
Sbjct 293282 GDKGSKGDKGDKGIDGNKGEKGSKGDGDKGDIKLGESGADADKGDGDKGSKGDKGDK 293461

Query 102 GEPG 105  
G+ G  
Sbjct 293462 GDIG 293473

Score = 38.9 bits (89), Expect = 0.020, Method: Compositional matrix adjust.  
Identities = 28/65 (43%), Positives = 37/65 (57%), Gaps = 0/65 (0%)  
Frame = -3

Query 42 GIPGHPGHNGAPGRDGRDGTTPGEKGEKGDPLGIGPKGDIGETGVPGAEGPRGFPGIQGRK 101  
G G G G G G G G +KG+KGD G G KGD+G+ G G +G +G G +G K

Sbjct 87699 GDKGDVGDKGDVGDKGDIGDKGDKGDLGDKGDKGDVGDKGDVGDKGDIGDKGDK 87520

Query 102 GEPGE 106  
G+ G+

Sbjct 87519 GDLGD 87505

Score = 38.9 bits (89), Expect = 0.020, Method: Compositional matrix adjust.  
Identities = 28/65 (43%), Positives = 36/65 (55%), Gaps = 0/65 (0%)  
Frame = -3

Query 42 GIPGHPGHNGAPGRDGRDGTPEKEKGEKGDPLIGPKGDIGETGVPGAEGPRGFPGIQGRK 101  
G G+ G G+ G G G G+KG+KGD G G KGD G+ G G G +G G G K

Sbjct 88419 GDKGNKGDGTGSKGDVGDKGDVGDKGDGTGDKGDKGDTGDKGDKGDVGDKGDVGDGDK 88240

Query 102 GEPGE 106  
G+ G+

Sbjct 88239 GDVGD 88225

Score = 38.9 bits (89), Expect = 0.021, Method: Compositional matrix adjust.  
Identities = 26/65 (40%), Positives = 36/65 (55%), Gaps = 0/65 (0%)  
Frame = -3

Query 42 GIPGHPGHNGAPGRDGRDGTPEKEKGEKGDPLIGPKGDIGETGVPGAEGPRGFPGIQGRK 101  
G G G G G G G G+ G+KG+ G G KGD+G+ G G +G +G G +G K

Sbjct 88491 GSKGDQGDKGDQGDKGDQGDKGDVGDKGNKGDGTGSKGDVGDKGDVGDKGDGTGDKGDK 88312

Query 102 GEPGE 106  
G+ G+

Sbjct 88311 GDTGD 88297

Score = 38.9 bits (89), Expect = 0.022, Method: Compositional matrix adjust.  
Identities = 28/64 (44%), Positives = 32/64 (50%), Gaps = 0/64 (0%)  
Frame = +1

Query 42 GIPGHPGHNGAPGRDGRDGTPEKEKGEKGDPLIGPKGDIGETGVPGAEGPRGFPGIQGRK 101  
G G G G G G G G G KGD G G KG+ G G G +G +GF G +G K

Sbjct 239440 GDKGDKGSKYKGDKGDKGIKNTGSKGDKGSKGDKGEKGSKNKGEKGEKGFKEKGSK 239619

Query 102 GEPG 105  
GE G

Sbjct 239620 GEKG 239631

Score = 38.5 bits (88), Expect = 0.023, Method: Compositional matrix adjust.  
Identities = 28/58 (48%), Positives = 32/58 (55%), Gaps = 0/58 (0%)  
Frame = +3

Query 48 GHNGAPGRDGRDGTPEKEKGEKGDPLIGPKGDIGETGVPGAEGPRGFPGIQGRKGEPG 105  
G G G G G GEKG KGD G +G KGD G G G +G +G G +G KGE G

Sbjct 298740 GDKGITGDKGDKEIGEKGKGDKGDVGVKGDGDKGDKGDKGDKGDKGDKGDKGDKGDKGDK 298913

Score = 38.5 bits (88), Expect = 0.024, Method: Compositional matrix adjust.  
Identities = 29/68 (43%), Positives = 36/68 (53%), Gaps = 3/68 (4%)  
Frame = +1

Query 42 GIPGHPGHNGAPGRDGRDGTTPGEKGE---KGDPLIGPKGDIGETGVPGAEGPRGFPGIQ 98  
G G G N G G +GT G+KG+ KGD G G KGD G+ G G +G G G +  
Sbjct 238117 GDKGMKGDNSTKGDKGDNGTKGDKGDNGIKGDKGDNGTKGDNGDNGTKGDKGDNGIKGDK 238296

Query 99 GRKGEPGE 106  
G KG G+  
Sbjct 238297 GDKGTKGD 238320

Score = 38.5 bits (88), Expect = 0.024, Method: Compositional matrix adjust.  
Identities = 27/65 (42%), Positives = 37/65 (57%), Gaps = 0/65 (0%)  
Frame = +1

Query 42 GIPGHPGHNGAPGRDGRDGTTPGEKGEKGDPLIGPKGDIGETGVPGAEGPRGFPGIQGRK 101  
G G G+ G G G +G G KG KGD G+ G +GD G G G++G +G G +G K  
Sbjct 239800 GDKGDKGNKGEKGNRDEGDKGIKGNKGDKGIKSGEDKGIKGESGSKGDKGEKGNKGYK 239979

Query 102 GEPGE 106  
G+ G+  
Sbjct 239980 GDKGD 239994

Score = 38.5 bits (88), Expect = 0.024, Method: Compositional matrix adjust.  
Identities = 27/64 (42%), Positives = 35/64 (55%), Gaps = 3/64 (5%)  
Frame = +2

Query 42 GIPGHPGHNGAPGRDGRDGTTPGEKGEKGDPLIGPKGDIGETGVPGAEGPRGFPGIQGRK 101  
G G G G PG G G +KG+KGD G KGD G+ G+ G +G +G G +G K  
Sbjct 293201 GDKGSKGDKGDPGKIGESGADADKGDKGDK---GSKGDKGDKGIDGNKGEKGSKGDKGDK 293371

Query 102 GEPG 105  
G+ G  
Sbjct 293372 GDIG 293383

Score = 38.5 bits (88), Expect = 0.025, Method: Compositional matrix adjust.  
Identities = 22/44 (50%), Positives = 29/44 (66%), Gaps = 0/44 (0%)  
Frame = +2

Query 60 GTPGEKGEKGDPLIGPKGDIGETGVPGAEGPRGFPGIQGRKGE 103  
G G+KG+KGD GL G KGD G+ G G +G +G G +G KG+  
Sbjct 294527 GLKGDKGDKGDVGLKGDKGDVGSKGDKGDKGSKGDKGSKGD 294658

Score = 38.5 bits (88), Expect = 0.026, Method: Compositional matrix adjust.  
Identities = 22/55 (40%), Positives = 30/55 (55%), Gaps = 0/55 (0%)  
Frame = -3

Query 63 GEKGEKGDPLIGPKGDIGETGVPGAEGPRGFPGIQGRKGEPEGAYVYRSAFSV 117  
G+KG KGD G+ G KGD G+ G G G +G G +G KG+ G+ S +  
Sbjct 879612 GDKGSKGDIGVKGSKGDNGDKGSKGDIGVKGSKGDKNKGDKNGLSILSGLDI 879448

Score = 38.5 bits (88), Expect = 0.026, Method: Compositional matrix adjust.  
Identities = 29/67 (43%), Positives = 38/67 (57%), Gaps = 3/67 (4%)  
Frame = -1

Query 42 GIPGHPGHNGAPGRDGRDGTTPGEKGEKGDPLIGPKGDI---GETGVPGAEGPRGFPGIQ 98  
 G G G+ G G G GT G++G+KG G G KGDI G+ G G +G RG G++  
 Sbjct 883745 GDAGLKGNGKGDIGLKGDKGTKGDRGDKGTGDKDRGDKDIGNKGDKGDKGTGDKDRGDKGVK 883566

Query 99 GRKGEPG 105  
 G KG+ G  
 Sbjct 883565 GDKGDKG 883545

Score = 38.5 bits (88), Expect = 0.027, Method: Compositional matrix adjust.  
 Identities = 30/68 (44%), Positives = 36/68 (53%), Gaps = 3/68 (4%)  
 Frame = +1

Query 42 GIPGHPGHNGAPGRDGRDGTTPGEKGE---KGDPLIGPKGDIGETGVPGAEGPRGFPGIQ 98  
 G G G NG G G +G G+KG+ KGD G G KGD G+ G G G +G+ G  
 Sbjct 238225 GTKGDNGDNGTKGDKGDNIGKDKGDKGTGDKGDKGTGDKDNGDKGTGDKDNGIKGYKGGDI 238404

Query 99 GRKGEPGE 106  
 G KG GE  
 Sbjct 238405 GDKGIKGE 238428

Score = 38.5 bits (88), Expect = 0.027, Method: Compositional matrix adjust.  
 Identities = 27/67 (40%), Positives = 35/67 (52%), Gaps = 0/67 (0%)  
 Frame = -3

Query 40 MAGIPGHPGHNGAPGRDGRDGTTPGEKGEKGDPLIGPKGDIGETGVPGAEGPRGFPGIQG 99  
 + G G G G G G G G G+KG+ GD G G KGD+G+ G G +G G G G  
 Sbjct 87840 IKGEKGDKGDGTGDKGDTGDKGDTGDKGDTGDKGDTGDKGDVGDKGDVGDKGDVGDKGDVGD 87661

Query 100 RKGEPEGE 106  
 KG+ G+  
 Sbjct 87660 DKGDKGD 87640

Score = 38.5 bits (88), Expect = 0.027, Method: Compositional matrix adjust.  
 Identities = 29/67 (43%), Positives = 37/67 (55%), Gaps = 3/67 (4%)  
 Frame = +1

Query 42 GIPGHPGHNGAPGRDGRDGTTPGEKGEKGDPLIGP---KGDIGETGVPGAEGPRGFPGIQ 98  
 G G G G G +G G G KG+KGD G+ G KGD+G+ G+ G +G G G +  
 Sbjct 239638 GNKGDKGDKGFKGDNGIKGNIGVKGDKGDGSGIKGENGLKGDVGDKGIKGDKGNEDKGDK 239817

Query 99 GRKGEPG 105  
 G KGE G  
 Sbjct 239818 GNKGEKG 239838

Score = 38.5 bits (88), Expect = 0.027, Method: Compositional matrix adjust.  
 Identities = 29/65 (45%), Positives = 36/65 (55%), Gaps = 0/65 (0%)  
 Frame = -1

Query 42 GIPGHPGHNGAPGRDGRDGTTPGEKGEKGDPLIGPKGDIGETGVPGAEGPRGFPGIQGRK 101  
 G G G G G G G G G+KGEKGD G+ G KG G+ G G +G +G G +G K  
 Sbjct 884987 GEKGIKGDKGDIGEKGNKGDIGDKGEKGDKIDGDKGIKGDIGEKGDKGDIGEKGNK 884808

Query 102 GEPGE 106  
 GE G+

Sbjct 884807 GEKGD 884793

Score = 38.5 bits (88), Expect = 0.029, Method: Compositional matrix adjust.  
Identities = 30/69 (43%), Positives = 36/69 (52%), Gaps = 3/69 (4%)  
Frame = -3

Query 40 MAGIPGHPGHNGAPGRDGRDGTTPGEKGD---EKGDPLIGPKGDIGETGVPGAEGPRGFPG 96  
+ G G G G G G GT G+KG +KGD G+ G KGDIG G G +G +G G  
Sbjct 878718 LKGDKGEKGEKGNVGDKGDIGTKGDKGNVGDKGDIGIKGEKGDIGTKGDIGNKGDKGDGK 878539  
Query 97 IQGRKGEPEG 105  
G KG G  
Sbjct 878538 DIGNKGNI 878512

Score = 38.5 bits (88), Expect = 0.030, Method: Compositional matrix adjust.  
Identities = 23/47 (49%), Positives = 31/47 (66%), Gaps = 0/47 (0%)  
Frame = -1

Query 60 GTPGEKGEKGDPLIGPKGDIGETGVPGAEGPRGFPGIQGRKGEPEG 106  
G G+KG+KGD G IG KGD G+ G G +G +G G +G KG+ G+  
Sbjct 883484 GLKGDKGDKGDGTGDIKGLKGDIGEKGIKGDKINGSKGYKGDKGD 883344

Score = 38.1 bits (87), Expect = 0.030, Method: Compositional matrix adjust.  
Identities = 27/65 (42%), Positives = 36/65 (55%), Gaps = 0/65 (0%)  
Frame = -1

Query 42 GIPGHPGHNGAPGRDGRDGTTPGEKGEKGDPLIGPKGDIGETGVPGAEGPRGFPGIQGRK 101  
G G+ G G G G G+ GEKG+ G+ G G KGD G+ G+ G G +G G G K  
Sbjct 884051 GDKGNAGDKGTSGEKGDLSKGEKGDTEKGDKNKGDGRDGIKGDIGSKGDKGDIGNK 883872  
Query 102 GEPGE 106  
G+ G+  
Sbjct 883871 GDKGD 883857

Score = 38.1 bits (87), Expect = 0.032, Method: Compositional matrix adjust.  
Identities = 27/65 (42%), Positives = 33/65 (51%), Gaps = 0/65 (0%)  
Frame = -3

Query 42 GIPGHPGHNGAPGRDGRDGTTPGEKGEKGDPLIGPKGDIGETGVPGAEGPRGFPGIQGRK 101  
G G G G G+ G G G KG+ GD G G KGD G G G +G +G G G K  
Sbjct 879225 GNKGDAGDKGDAGKKGEKGEKGNKGDIGDKGNDGIKGDGFGSKGYKGDKGSKGTGNNGFK 879046  
Query 102 GEPGE 106  
G+ G+  
Sbjct 879045 GDRGD 879031

Score = 38.1 bits (87), Expect = 0.032, Method: Compositional matrix adjust.  
Identities = 29/67 (43%), Positives = 37/67 (55%), Gaps = 3/67 (4%)  
Frame = +1

Query 42 GIPGHPGHNGAPGRDGRDGTTPGEKGEKGDPL---IGPKGDIGETGVPGAEGPRGFPGIQ 98  
G G G G G G G G+KG KGD G+ IG KGD G++G+ G G +G G +  
Sbjct 239593 GFKGEKGSKGEKGSKNKGDKDKGFKGDNIGKGNIGVKGDKGDSDGIKGENGLKGDVGDK 239772

Query 99 GRKGEFG 105  
G KG+ G  
Sbjct 239773 GIKGDKG 239793

Score = 38.1 bits (87), Expect = 0.032, Method: Compositional matrix adjust.  
Identities = 27/65 (42%), Positives = 35/65 (54%), Gaps = 0/65 (0%)  
Frame = -3

Query 42 GIPGHPGHNGAPGRDGRDGTTPGEKGEKGDPLIGPKGDIGETGVPGAEGPRGFPGIQRK 101  
G G G G G G G G+ G+KGD G +G KGD+G+ G G G +G G G K  
Sbjct 87681 GDKGDVGDKGDKGDKDIGDKGDKGDLGDKGDKGDVGDGDKGDVGDGDKGDKGDKGDKGDKGDLGDK 87502

Query 102 GEPGE 106  
G+ G+  
Sbjct 87501 GDKGD 87487

Score = 38.1 bits (87), Expect = 0.035, Method: Compositional matrix adjust.  
Identities = 29/70 (41%), Positives = 38/70 (54%), Gaps = 3/70 (4%)  
Frame = +1

Query 39 WM--AGIPGHPGHNGAPGRDGRDGTTPGEKGEKGDPLIGPKGDIGETGVPGAEGPRGFPG 96  
W+ G+ G G G G G G G+KGE G G G KGD+G+ G GA+G +G G  
Sbjct 237538 WIPQVGLKGSQGDQGYKGDQGSKGDGKQKGEFGSAGFKGDGDMGQKGETGAKGDKGDKG 237717

Query 97 IQGRKGEPEG 106  
+G KG G+  
Sbjct 237718 -EGSKGSKGD 237744

Score = 38.1 bits (87), Expect = 0.035, Method: Compositional matrix adjust.  
Identities = 25/65 (38%), Positives = 35/65 (54%), Gaps = 0/65 (0%)  
Frame = -3

Query 42 GIPGHPGHNGAPGRDGRDGTTPGEKGEKGDPLIGPKGDIGETGVPGAEGPRGFPGIQRK 101  
G G G+ G G +G G G+ G+KGD+ G G GD G+ G G +G G G +G K  
Sbjct 878226 GDNGDKGNKGDGKGDNGDKGDKGDNNGDKGNKGDGKDNNGDKGNKGDGKDNNGDKGNKGDGK 878047

Query 102 GEPGE 106  
G+ G+  
Sbjct 878046 GDNGD 878032

Score = 38.1 bits (87), Expect = 0.035, Method: Compositional matrix adjust.  
Identities = 29/64 (45%), Positives = 32/64 (50%), Gaps = 0/64 (0%)  
Frame = +1

Query 42 GIPGHPGHNGAPGRDGRDGTTPGEKGEKGDPLIGPKGDIGETGVPGAEGPRGFPGIQRK 101  
G G G G G G G G G G+ G G G +G +GF G G K  
Sbjct 239512 GSKGDKGSKGDKGEKGSKGNKGEKGEKGFKEKGSKGEKGSKGNKGDGDKGDKGDKGDKGDKGDKGDKGDKGDK 239691

Query 102 GEPG 105  
G G  
Sbjct 239692 GNIG 239703



Score = 38.1 bits (87), Expect = 0.037, Method: Compositional matrix adjust.  
Identities = 25/65 (38%), Positives = 35/65 (54%), Gaps = 0/65 (0%)  
Frame = -3

Query 42 GIPGHPGHNGAPGRDGRDGTTPGEKGEKGDPLIGPKGDIGETGVPGAEGPRGFPIQGRK 101  
G G G+ G G +G G G+ G+KG+ G G GD G+ G G +G +G G G K  
Sbjct 878289 GNKGDKNKGDKNKGDNDKGDKNKGDKNKGDKNKGDNDKGDKNKGDKNKGDNDK 878110

Query 102 GEPGE 106  
G+ G+  
Sbjct 878109 GDNGD 878095

Score = 38.1 bits (87), Expect = 0.038, Method: Compositional matrix adjust.  
Identities = 28/65 (43%), Positives = 35/65 (54%), Gaps = 0/65 (0%)  
Frame = -3

Query 42 GIPGHPGHNGAPGRDGRDGTTPGEKGEKGDPLIGPKGDIGETGVPGAEGPRGFPIQGRK 101  
G G G G G G G G+KG+KGD G G KGD+G+ G G G +G G G K  
Sbjct 87600 GDKGDVGDKNKGDKNKGDKNKGDKNKGDKNKGDKNKGDKNKGDKNKGDKNK 87421

Query 102 GEPGE 106  
G+ G+  
Sbjct 87420 GDKGD 87406

Score = 37.7 bits (86), Expect = 0.041, Method: Compositional matrix adjust.  
Identities = 24/55 (44%), Positives = 30/55 (55%), Gaps = 0/55 (0%)  
Frame = +1

Query 42 GIPGHPGHNGAPGRDGRDGTTPGEKGEKGDPLIGPKGDIGETGVPGAEGPRGFPG 96  
G G G+ G G G GT G+KG KGD G G KG G+ G+ G +G +G G  
Sbjct 239188 GTKGDKNKGDKNKGDKNKGDKNKGDKNKGDKNKGDKNKGDKNKGDKNK 239352

Score = 37.7 bits (86), Expect = 0.041, Method: Compositional matrix adjust.  
Identities = 26/58 (45%), Positives = 31/58 (53%), Gaps = 0/58 (0%)  
Frame = +2

Query 48 GHNGAPGRDGRDGTTPGEKGEKGDPLIGPKGDIGETGVPGAEGPRGFPIQGRKGEPG 105  
G NG G G G PG KG KG+ G G KG G+ G PG +G G +G KG+ G  
Sbjct 293120 GENGDKNKGDKNKGDKNKGDKNKGDKNKGDKNKGDKNKGDKNKGDKNK 293293

Score = 37.7 bits (86), Expect = 0.041, Method: Compositional matrix adjust.  
Identities = 29/67 (43%), Positives = 37/67 (55%), Gaps = 0/67 (0%)  
Frame = +1

Query 40 MAGIPGHPGHNGAPGRDGRDGTTPGEKGEKGDPLIGPKGDIGETGVPGAEGPRGFPIQG 99  
+ G G G NG G G G G+KG KGD G IG KG G+ G G +G G G++G  
Sbjct 237922 IKGDKNKGDKNKGDKNKGDKNKGDKNKGDKNKGDKNKGDKNKGDKNK 238101

Query 100 RKGEPE 106  
KG+ G+  
Sbjct 238102 DKGDIGD 238122

Score = 37.7 bits (86), Expect = 0.041, Method: Compositional matrix adjust.

Identities = 28/67 (42%), Positives = 37/67 (55%), Gaps = 0/67 (0%)  
Frame = -1

Query 40 MAGIPGHPGHNGAPGRDGRDGTTPGEKGEKGDPLIGPKGDIGETGVPGAEGPRGFPGIQG 99  
+ G G G G G G G GEKG KGD G+ G KG G+ G G++G +G G +G  
Sbjct 883481 LKGDKGDKGDGTGDIKGLKGDKGDIGEKGIKGDKINGSKGYKGDKDKGSKGDKNKGDGK 883302

Query 100 RKGEPGE 106  
KG+ G+  
Sbjct 883301 SKGDKGD 883281

Score = 37.7 bits (86), Expect = 0.043, Method: Compositional matrix adjust.  
Identities = 27/65 (42%), Positives = 35/65 (54%), Gaps = 0/65 (0%)  
Frame = -3

Query 42 GIPGHPGHNGAPGRDGRDGTTPGEKGEKGDPLIGPKGDIGETGVPGAEGPRGFPGIQGRK 101  
G G G G G G G G+KG+KGD G G KGD+G+ G G G +G G +G  
Sbjct 88392 GSKGDVGDKGDVGDKGDKGDGTGDKGDKGDTGDKGDKGDVGDKGDVGDKGDVGDKGDV 88213

Query 102 GEPGE 106  
G+ G+  
Sbjct 88212 GDKGD 88198

Score = 37.7 bits (86), Expect = 0.043, Method: Compositional matrix adjust.  
Identities = 26/62 (42%), Positives = 34/62 (55%), Gaps = 0/62 (0%)  
Frame = -3

Query 45 GHPGHNGAPGRDGRDGTTPGEKGEKGDPLIGPKGDIGETGVPGAEGPRGFPGIQGRK 104  
G G G G G G G G+KG+KGD G G KGD+G+ G G +G G G +G G+  
Sbjct 88356 GDKGDKGDTGDKGDKGDTGDKGDKGDVGDKGDVGDKGDVGDKGDVGDKGDVGDKGD 88177

Query 105 GE 106  
G+  
Sbjct 88176 GD 88171

Score = 37.7 bits (86), Expect = 0.043, Method: Compositional matrix adjust.  
Identities = 28/65 (43%), Positives = 35/65 (54%), Gaps = 0/65 (0%)  
Frame = -3

Query 42 GIPGHPGHNGAPGRDGRDGTTPGEKGEKGDPLIGPKGDIGETGVPGAEGPRGFPGIQGRK 101  
G G+ G G G G G G KG+ G+ G G KGDIG G G +G +G G++G  
Sbjct 878649 GDKGNVGDKGDIGIKGEKGDIGTKGDIGNKGDKGDIGNKGNIGNKGEKGDKGVKGD 878470

Query 102 GEPGE 106  
GE GE  
Sbjct 878469 GEKGE 878455

Score = 37.7 bits (86), Expect = 0.044, Method: Compositional matrix adjust.  
Identities = 30/65 (46%), Positives = 33/65 (51%), Gaps = 0/65 (0%)  
Frame = +1

Query 42 GIPGHPGHNGAPGRDGRDGTTPGEKGEKGDPLIGPKGDIGETGVPGAEGPRGFPGIQGRK 101  
GI G G G G DG G G GE G G G KGD GE G G +G +G G G K  
Sbjct 238459 GIKGDKGDKGIKGDGSKGDKGYNGEIGQKGDNGEKGDNGEKGDNGEKGDKGEKGDIGEK 238638

Query 102 GEPGE 106  
G+ GE  
Sbjct 238639 GDNGE 238653

Score = 37.7 bits (86), Expect = 0.047, Method: Compositional matrix adjust.  
Identities = 28/64 (44%), Positives = 35/64 (55%), Gaps = 0/64 (0%)  
Frame = -1

Query 42 GIPGHPGHNGAPGRDGRDGTTPGEKGEKGDPLIGPKGDIGETGVPGAEGPRGFPGIQGRK 101  
G G G+ G G G G G+ G KGD G IG KGD G G G +G +G G++G K  
Sbjct 883898 GDKGDIGNKGDKDRGDKGIKGDAGLKGDKGDIGQKGDKGTGDRGDKGEKGDAGLKGNK 883719

Query 102 GEPG 105  
G+ G  
Sbjct 883718 GDIG 883707

Score = 37.7 bits (86), Expect = 0.047, Method: Compositional matrix adjust.  
Identities = 26/65 (40%), Positives = 34/65 (52%), Gaps = 0/65 (0%)  
Frame = -3

Query 42 GIPGHPGHNGAPGRDGRDGTTPGEKGEKGDPLIGPKGDIGETGVPGAEGPRGFPGIQGRK 101  
G G+ G G G G G G KG KG+ G G +GD G+ G G +G G G +G K  
Sbjct 879144 GDKGNDGIKGDGFGSKGYKGDKSGKGTGNNGFKGDRGDKGDKSGDKGDNIGKGNKGSK 878965

Query 102 GEPGE 106  
G+ G+  
Sbjct 878964 GDKGD 878950

Score = 37.7 bits (86), Expect = 0.048, Method: Compositional matrix adjust.  
Identities = 28/65 (43%), Positives = 37/65 (57%), Gaps = 0/65 (0%)  
Frame = +3

Query 42 GIPGHPGHNGAPGRDGRDGTTPGEKGEKGDPLIGPKGDIGETGVPGAEGPRGFPGIQGRK 101  
G+ G G G G G G G KG+KGD G G KG GE G+ G++G +G G +G K  
Sbjct 298911 GLKGENDIGDKGDKGSKGEDGLKGDKGDIGDKGDKGSKGEDGLKGSKGDKEIGNKGDK 299090

Query 102 GEPGE 106  
G+ G+  
Sbjct 299091 GDKGD 299105

Score = 37.7 bits (86), Expect = 0.048, Method: Compositional matrix adjust.  
Identities = 26/65 (40%), Positives = 34/65 (52%), Gaps = 0/65 (0%)  
Frame = -3

Query 42 GIPGHPGHNGAPGRDGRDGTTPGEKGEKGDPLIGPKGDIGETGVPGAEGPRGFPGIQGRK 101  
G G G G G G G G+KG KGD G G KG+ G+ G G +G +G G +G  
Sbjct 878136 GDKGDNGDKGDNKGNKGDNGDKGNKGDKGDNGDKGNKGDKGDNGDKGNKGDKGDKGDN 877957

Query 102 GEPGE 106  
G+ G+  
Sbjct 877956 GDKGD 877942



Sbjct 885545 GEKGDKGLGEKGEKGDPGQKGEKGDKGFDFDKDKGDIGEKGDIGDKGEIGNKGDV 885366  
 Query 102 GE 105  
 GE G  
 Sbjct 885365 GEKG 885354

Score = 37.7 bits (86), Expect = 0.052, Method: Compositional matrix adjust.  
 Identities = 27/64 (42%), Positives = 33/64 (52%), Gaps = 0/64 (0%)  
 Frame = -1

Query 43 IPGHPGHNGAPGRDGRDGTGPEKGEKGDPLIGPKGDIGETGVPGAEGPRGFPGIQRKG 102  
 + G G G G DG G G+ G+KG G G KGD G G G +G +G G G KG  
 Sbjct 885200 LKGEKGDKGNKIDGEEKGNKGDGTGDKGIDGSKGDKGDTGNKGDIGDKGDQGIKGDIGDKG 885021

Query 103 EPGE 106  
 E G+  
 Sbjct 885020 EKGD 885009

Score = 37.4 bits (85), Expect = 0.054, Method: Compositional matrix adjust.  
 Identities = 27/67 (40%), Positives = 37/67 (55%), Gaps = 0/67 (0%)  
 Frame = +1

Query 40 MAGIPGHPGHNGAPGRDGRDGTGPEKGEKGDPLIGPKGDIGETGVPGAEGPRGFPGIQ 99  
 + G G G G G G G G+KG+KG+ G G +GD G+ G+ G +G +G G +G  
 Sbjct 239731 IKGENGLKGDVGDGDKGDKGNEGDKGDKGNKGEKGNRGDEGDKGDKGDKGDKGSE 239910

Query 100 RKGEPGE 106  
 KG GE  
 Sbjct 239911 DKGKGE 239931

Score = 37.4 bits (85), Expect = 0.055, Method: Compositional matrix adjust.  
 Identities = 29/68 (43%), Positives = 35/68 (51%), Gaps = 3/68 (4%)  
 Frame = +1

Query 42 GIPGHPGHNGAPGRDGRDGTGPEK---GEKGDPLIGPKGDIGETGVPGAEGPRGFPGIQ 98  
 G G G NG G G +GT G+ G KGD G G KGD G+ G G +G +G G  
 Sbjct 238171 GTKGDKGDNGIKGDKGDNGTGKGDNGDNGTKGDKGDNGIKGDKGDKGDKGDKGDKG 238350

Query 99 GRKGE 106  
 G KG G+  
 Sbjct 238351 GDKGTKGD 238374

Score = 37.4 bits (85), Expect = 0.055, Method: Compositional matrix adjust.  
 Identities = 25/63 (40%), Positives = 33/63 (52%), Gaps = 0/63 (0%)  
 Frame = -3

Query 44 PGHPGHNGAPGRDGRDGTGPEKGEKGDPLIGPKGDIGETGVPGAEGPRGFPGIQRKGE 103  
 G G+ G G G G KG+KG+ G G KGD G+ G G +G G G +G KG+  
 Sbjct 878364 KGDGKGNKGDGKSDKGDGKGNKGDGKGNKGDGKGNKGDGKGNKGDGKGNKGDGKGNK 878185

Query 104 PGE 106  
 G+  
 Sbjct 878184 NGD 878176

Score = 37.4 bits (85), Expect = 0.057, Method: Compositional matrix adjust.  
Identities = 28/65 (43%), Positives = 36/65 (55%), Gaps = 0/65 (0%)  
Frame = -1

Query 42 GIPGHPGHNGAPGRDGRDGTTPGEKGEKGDPLIGPKGDIGETGVPGAEGPRGFPGIQGRK 101  
G G G+ G G G G G+ G+KG+ G IG KGD GE G+ G +G G G +G  
Sbjct 885104 GDKGDTGNKGDIGDKGDQGIKGDIGDKGEKGDIGEKGDKEKGIKGDKGDIGEKGNKGGDI 884925

Query 102 GEPGE 106  
G+ GE  
Sbjct 884924 GDKGE 884910

Score = 37.4 bits (85), Expect = 0.061, Method: Compositional matrix adjust.  
Identities = 27/65 (42%), Positives = 34/65 (52%), Gaps = 0/65 (0%)  
Frame = -3

Query 42 GIPGHPGHNGAPGRDGRDGTTPGEKGEKGDPLIGPKGDIGETGVPGAEGPRGFPGIQGRK 101  
G G G G G G G G G KG+ GD G +G KGD G+TG G +G G G +G  
Sbjct 88455 GDKGDQGDKGDVGDKNKGDGTGSKGDVGDKNKGDVGDKNKGDGTGDKGDKGDTGDKGDKGDV 88276

Query 102 GEPGE 106  
G+ G+  
Sbjct 88275 GDKGD 88261

Score = 37.4 bits (85), Expect = 0.062, Method: Compositional matrix adjust.  
Identities = 27/62 (44%), Positives = 33/62 (53%), Gaps = 0/62 (0%)  
Frame = -3

Query 45 GHPGHNGAPGRDGRDGTTPGEKGEKGDPLIGPKGDIGETGVPGAEGPRGFPGIQGRKGEP 104  
G G G G G G G+ G KGD G +G KGDIG G G G +G G +G KG+  
Sbjct 878721 GLKGDKEKGEKGNVGDKNKGDIGTKGDKGNVGDKNKGDIGIKGEKGDIGTKGDIGNKGDKNKGD 878542

Query 105 GE 106  
G+  
Sbjct 878541 GD 878536

Score = 37.4 bits (85), Expect = 0.064, Method: Compositional matrix adjust.  
Identities = 28/65 (43%), Positives = 35/65 (54%), Gaps = 0/65 (0%)  
Frame = -3

Query 42 GIPGHPGHNGAPGRDGRDGTTPGEKGEKGDPLIGPKGDIGETGVPGAEGPRGFPGIQGRK 101  
G G G G G G G G G+KG+KGD G G KGD+G+ G G G +G G G K  
Sbjct 87627 GDKGDLGDKGDKGDVGDKNKGDVGDKNKGDIGDKGDKGDLGDKGDKGDVGDKNKGDVGDKNK 87448

Query 102 GEPGE 106  
G+ G+  
Sbjct 87447 GDKGD 87433

Score = 37.4 bits (85), Expect = 0.065, Method: Compositional matrix adjust.  
Identities = 29/70 (41%), Positives = 35/70 (50%), Gaps = 5/70 (7%)  
Frame = +1

Query 42 GIPGHPGHNGAPGRDGRD-----GTPGEKGEKGDPLIGPKGDIGETGVPGAEGPRGFPG 96

GI G G +G G G+D G GE G KGD G+ G G G G PG +G G G  
 Sbjct 296020 GIKGDKGTDGIKGDKGQDNFVSGKQKGETGSKGDDGIKGITGSKGFKGDPGTKGENGING 296199  
 Query 97 IQGRKGEPE 106  
 +G KG G+  
 Sbjct 296200 TKGLKGSQGD 296229

Score = 37.0 bits (84), Expect = 0.070, Method: Compositional matrix adjust.  
 Identities = 27/65 (42%), Positives = 35/65 (54%), Gaps = 0/65 (0%)  
 Frame = +1

Query 42 GIPGHPGHNGAPGRDGRDGTPEKEKEDPGLIGPKGDIGETGVPGAEGPRGFPGIQGRK 101  
 G G G G G G G G +KG+ GD G+ G KGDIG+ G+ G +G G G K  
 Sbjct 238000 GNKGDKGDIGDKGMKGDIGDKGDIGDKGMKGDIGDKGMKGDNDSTKGDKGDNGTK 238179  
 Query 102 GEPGE 106  
 G+ G+  
 Sbjct 238180 GDKGD 238194

Score = 37.0 bits (84), Expect = 0.072, Method: Compositional matrix adjust.  
 Identities = 24/61 (39%), Positives = 33/61 (54%), Gaps = 0/61 (0%)  
 Frame = -3

Query 46 HPGHNGAPGRDGRDGTPEKEKEDPGLIGPKGDIGETGVPGAEGPRGFPGIQGRKGEPE 105  
 + G G G G G +KG KGD G G KG+ G+ G G +G +G G +G KG+ G  
 Sbjct 878367 NKGDKGNKGDKGDKSDKGDKGNKGDKGNKGDKGNKGDKGNKGDNDKGDKGDNDKGNKGDK 878188  
 Query 106 E 106  
 +  
 Sbjct 878187 D 878185

Score = 37.0 bits (84), Expect = 0.072, Method: Compositional matrix adjust.  
 Identities = 29/65 (45%), Positives = 33/65 (51%), Gaps = 0/65 (0%)  
 Frame = -1

Query 42 GIPGHPGHNGAPGRDGRDGTPEKEKEDPGLIGPKGDIGETGVPGAEGPRGFPGIQGRK 101  
 G G G G G G G G KG KGD GL G KG G+ G G +G RG G G K  
 Sbjct 883799 GQKGDKGTGKDRGDKGEKGDAGLKGKGDIGLKGDKGTGKDRGDKGTGKDRGDKGDIGNK 883620  
 Query 102 GEPGE 106  
 G+ G+  
 Sbjct 883619 GDKGD 883605

Score = 37.0 bits (84), Expect = 0.074, Method: Compositional matrix adjust.  
 Identities = 27/65 (42%), Positives = 36/65 (55%), Gaps = 0/65 (0%)  
 Frame = -1

Query 42 GIPGHPGHNGAPGRDGRDGTPEKEKEDPGLIGPKGDIGETGVPGAEGPRGFPGIQGRK 101  
 G G G G G G G G +G GEKG+ G IG KG+ G+ G+ G +G +G G G K  
 Sbjct 885023 GEKGDIGEKGDKGEKGIKGDIGEKGNKGDIGDKGEKGDIGDKGIDGDKGIKGDKGDIGEK 884844  
 Query 102 GEPGE 106  
 G+ G+  
 Sbjct 884843 GDKGD 884829

Score = 37.0 bits (84), Expect = 0.074, Method: Compositional matrix adjust.  
Identities = 27/70 (39%), Positives = 34/70 (49%), Gaps = 0/70 (0%)  
Frame = -3

Query 40 MAGIPGHPGHNGAPGRDGRDGTTPGEKGEKGDPLIGPKGDIGETGVPGAEGPRGFPGIQG 99  
G G G G G G G G+KGEKG+ G G GD G G+ G G +G+ G +G  
Sbjct 879258 TTGDKGDKGDVGNKGDAGDKGDAGKKGEKGEKGMGNKGDIGDKGNDGIKGDGFGSKGYKGDKG 879079

Query 100 RKGEPGEGAY 109  
KG G +  
Sbjct 879078 SKGTKGNNGF 879049

Score = 37.0 bits (84), Expect = 0.077, Method: Compositional matrix adjust.  
Identities = 32/74 (43%), Positives = 36/74 (49%), Gaps = 9/74 (12%)  
Frame = +1

Query 42 GIPGHPGHNGAPGRDGRDGTTPGEKGEKGDPL-----IGPKGDIGETGVPGAEGPR 92  
GI G G N G G G G+KG KGD G IG KGD GE G G +G  
Sbjct 238414 GIKGESGANADKGDGKGIKGDGDKGDKGDDGSKGDKGYNGEIGQKGDNGEKGDNGEKGDN 238593

Query 93 GFPGIQGRKGEPE 106  
G G +G KG+ GE  
Sbjct 238594 GEKGDKGEKGDIGE 238635

Score = 37.0 bits (84), Expect = 0.089, Method: Compositional matrix adjust.  
Identities = 28/64 (44%), Positives = 35/64 (55%), Gaps = 0/64 (0%)  
Frame = -1

Query 42 GIPGHPGHNGAPGRDGRDGTTPGEKGEKGDPLIGPKGDIGETGVPGAEGPRGFPGIQGRK 101  
G G G+ G G G G G KG+KGD G G KGD G+ G+ G G +G G G+K  
Sbjct 883970 GEKGDKGNKGDGRDGDGKGIKGDIGSKGDKGDIGNKGDGDKGRDGDGKGIKGDAGLKGDKGDIGQK 883791

Query 102 GEPG 105  
G+ G  
Sbjct 883790 GDKG 883779

Score = 36.6 bits (83), Expect = 0.098, Method: Compositional matrix adjust.  
Identities = 27/68 (40%), Positives = 34/68 (50%), Gaps = 3/68 (4%)  
Frame = +1

Query 42 GIPGHPGHNGAPGRDGRDGTTPGEKGEKGDPLIGP---KGDIGETGVPGAEGPRGFPGIQ 98  
G G G G G G G G+KG+KG G IG KGD G+ G+ G G +G G  
Sbjct 296944 GESGDKGDIGIKGDGKAKGVTGDKGDKGTGKGFIGNVGFKGDGDKGIIGDNGSKGIKGS 297123

Query 99 GRKGEPE 106  
KG+ G+  
Sbjct 297124 NNGDKGD 297147

Score = 36.6 bits (83), Expect = 0.098, Method: Compositional matrix adjust.  
Identities = 27/65 (42%), Positives = 35/65 (54%), Gaps = 0/65 (0%)  
Frame = -1



Query 42 GIPGHPGHNGAPGRDGRDGTTPGEKGEKGDPLIGPKGDIGETGVPGAEGPRGFPGIQGRK 101  
 G G G G G G G G+ G+KGD G G +GD GE G G +G +G G++G K  
 Sbjct 883871 GDKGDRGDKGIKGDAGLKGDKDIGQKGDKGTKGDRGDKGEKGDAGLKGDKDIGLKGDK 883692

Query 102 GEPGE 106  
 G G+  
 Sbjct 883691 GTKGD 883677

Score = 36.6 bits (83), Expect = 0.099, Method: Compositional matrix adjust.  
 Identities = 28/65 (43%), Positives = 33/65 (51%), Gaps = 0/65 (0%)  
 Frame = +1

Query 41 AGIPGHPGHNGAPGRDGRDGTTPGEKGEKGDPLIGPKGDIGETGVPGAEGPRGFPGIQGRK 100  
 G G G G G G G PG KGE G G G KG G+ G G +G +G G +G  
 Sbjct 296104 TGSKGDDGIKGITGSKGFKGDPGKGENGINGTKGLKGSQGDLDGKDDGIKGIIGSKGI 296283

Query 101 KGEPG 105  
 KG+PG  
 Sbjct 296284 KGDPG 296298

>NC\_021308.1 Mycobacterium phage HINder, complete genome  
 Length=52617

Score = 50.1 bits (118), Expect = 4e-06, Method: Compositional matrix adjust.  
 Identities = 33/59 (56%), Positives = 40/59 (68%), Gaps = 0/59 (0%)  
 Frame = +3

Query 45 GHPGHNGAPGRDGRDGTTPGEKGEKGDPLIGPKGDIGETGVPGAEGPRGFPGIQGRKGE 103  
 G PG GAPG DG DG G +G+ G G+ GPKGD G+TG G +GP+G GIQG KG+  
 Sbjct 4083 GDPGDPGAPGADGADGAQGPQGDGPGQGIQGPKGDKGDTGDTGPPQPKGDQGIQGPKGD 4259

>NC\_023607.1 Mycobacterium phage 40AC, complete genome  
 Length=53396

Score = 50.1 bits (118), Expect = 5e-06, Method: Compositional matrix adjust.  
 Identities = 33/67 (49%), Positives = 42/67 (63%), Gaps = 0/67 (0%)  
 Frame = +3

Query 40 MAGIPGHPGHNGAPGRDGRDGTTPGEKGEKGDPLIGPKGDIGETGVPGAEGPRGFPGIQG 99  
 + G G G GA G G+ G G+KG+KGD GL GP+GD G G GA GP+G G+QG  
 Sbjct 4944 LKGADGEQGPAGADGAQQGQGPKGDKGDKGDTGLQGPQGDGPKGDTGATGPKGDTGLQG 5123

Query 100 RKGEPGE 106  
 KG+ G+  
 Sbjct 5124 PKGDKGD 5144

Score = 40.8 bits (94), Expect = 0.005, Method: Compositional matrix adjust.  
 Identities = 34/76 (45%), Positives = 41/76 (54%), Gaps = 9/76 (12%)  
 Frame = +3

Query 45 GHPGHNGAPGRDGRDGTTPGEKGEKGDPLIGPKGDIGETGVPGAEGPRGFPGIQGRKGE 104  
 G G G G +G DG G KG+KGD G +GP+ G+ GA GPRG G +G GE  
 Sbjct 4704 GDTGATGPAGTNGVDGAQGPKGDKGDQGEMGPQ-----GLTGATGPRGLEGPKGDTGER 4865

Query 105 GEGAYVYRSAFSVGL 120  
G Y SA+ V LE  
Sbjct 4866 GPLGY---SAYQVALE 4904

>NC\_021772.1 Salmonella phage FSL SP-058, complete genome  
Length=72394

Score = 49.3 bits (116), Expect = 7e-06, Method: Compositional matrix adjust.  
Identities = 32/73 (44%), Positives = 38/73 (52%), Gaps = 9/73 (12%)  
Frame = +2

Query 42 GIPGHPGHNGAPGRDGRDGTPEKGEKGDPE-----GLIGPKGDIGETGVPGAEGPR 92  
GI G G NG G +G DG G+KG+KGD GL G G G GV G +G +  
Sbjct 11471 GIDGKDGANGKDGINGIDGAKGDKGDKGDTGASGKDGKDGKGLNGTNGTNGRVDGKDGAK 11650

Query 93 GFPGIQGRKGEPE 105  
G G QG +GE G  
Sbjct 11651 GDTGAQGERGEQG 11689

Score = 48.5 bits (114), Expect = 1e-05, Method: Compositional matrix adjust.  
Identities = 37/128 (29%), Positives = 55/128 (43%), Gaps = 13/128 (10%)  
Frame = +2

Query 40 MAGIPGHPGHNGAPGRDGRDGTPEKGEKGDPEGLIGPKGDI-----GETGVPG 87  
+G G G NG G +GRDG G+ G KGD G G +G+ GE G G  
Sbjct 11564 ASGKDGKDGKGLNGTNGTNGRVDGKDGKDGKDTGAQGERGEQGIQGEAGKDGKGLNGENKDG 11743

Query 88 AEGPRGFPGIQGRKGEPEGAYVYRSAFSVGL ETYVTIPNMPPIRFTKIFYNQNHYD GST 147  
G G G +G KG+ G+ + + G + +T N K +Q+ ++ ST  
Sbjct 11744 LNGTNGLDGAKGDKGDEGKQGIAGIAGLN-GKDADMTQVNANTEANKSISKRQDAFEKST 11920

Query 148 GKFHCNIP 155  
+ N+  
Sbjct 11921 NQRFANMD 11944

Score = 47.0 bits (110), Expect = 5e-05, Method: Compositional matrix adjust.  
Identities = 27/65 (42%), Positives = 36/65 (55%), Gaps = 0/65 (0%)  
Frame = +2

Query 42 GIPGHPGHNGAPGRDGRDGTPEKGEKGDPEGLIGPKGDIGETGVPGAEGPRGFPGIQGRK 101  
G G G +GA G+DG +G G KG+KGD G G G G+ G+ G G G G+ G+  
Sbjct 11462 GKDGIDGKDGANGKDGINGIDGAKGDKGDKGDTGASGKDGKDGKGLNGTNGTNGRVDGKDG 11641

Query 102 GEPGE 106  
G G+  
Sbjct 11642 GAKGD 11656

Score = 46.2 bits (108), Expect = 9e-05, Method: Compositional matrix adjust.  
Identities = 27/63 (43%), Positives = 32/63 (51%), Gaps = 0/63 (0%)  
Frame = +2

Query 43 IPGHPGHNGAPGRDGRDGTPEKGEKGDPEGLIGPKGDIGETGVPGAEGPRGFPGIQGRK 102  
I G G +G G DG+DG G+ G G G G KGD G+TG G +G G G G G  
Sbjct 11438 IKGQNGKDGKDGIDGKDGANGKDGINGIDGAKGDKGDKGDTGASGKDGKDGKGLNGTNGTNG 11617

Query 103 EPG 105  
G  
Sbjct 11618 RDG 11626

Score = 45.4 bits (106), Expect = 2e-04, Method: Compositional matrix adjust.  
Identities = 29/64 (45%), Positives = 35/64 (55%), Gaps = 3/64 (5%)  
Frame = +2

Query 42 GIPGHPGHNGAPGRDGRDGTPEKGEKGDPLIGPKGDIGETGVPGAEGPRGFPGIQGRK 101  
G G G GA G+DG+DG G G G G+ G G G+T GA+G RG GIQG  
Sbjct 11534 GDKGDKGDTGASGKDGKDLNGTNGTNGRDGVDGKDGAKGDT---GAQGERGEQGIQGEA 11704

Query 102 GEPG 105  
G+ G  
Sbjct 11705 GKDG 11716

>NC\_011356.1 Enterobacteria phage YYZ-2008, complete prophage genome  
Length=54896

Score = 49.3 bits (116), Expect = 9e-06, Method: Compositional matrix adjust.  
Identities = 32/70 (46%), Positives = 39/70 (56%), Gaps = 0/70 (0%)  
Frame = +1

Query 43 IPGHPGHNGAPGRDGRDGTPEKGEKGDPLIGPKGDIGETGVPGAEGPRGFPGIQGRK 102  
+ G PG G G G G G+KGE+GD G +G G+ G G GA GP G G QG KG  
Sbjct 50290 VVGPPGPKGEQGPAGPQPKGDKGERGDTGVPVATGERGPKGETGAAGPVGATGPGQPKG 50469

Query 103 EPGEGAYVYR 112  
+PGE +R  
Sbjct 50470 DPGETQIRFR 50499

>NC\_022336.1 Propionibacterium phage PHL010M04, complete genome  
Length=29511

Score = 48.5 bits (114), Expect = 1e-05, Method: Compositional matrix adjust.  
Identities = 32/76 (42%), Positives = 43/76 (57%), Gaps = 6/76 (8%)  
Frame = +3

Query 42 GIPGHPGHNGAPGRDGRDGTPEKGEKGDPLIGPKGDIGETGVPGAEGPRGFPGIQGRK 101  
G+PG G +G G DGRDG+ GE+G+ G G GP+G+ GE GP+G G+ G  
Sbjct 15015 GVPGRAGDDGVNGADGRDGSAGERGDVGPSGSAGPQGERGE-----RGPQGPAGVNGSD 15176

Query 102 GEPGEGAYVYRSAFSV 117  
G+ G+ RS SV  
Sbjct 15177 GKDGKDGDRDGRSVVSV 15224

>NC\_000852.5 Paramecium bursaria Chlorella virus 1, complete genome  
Length=330611

Score = 48.5 bits (114), Expect = 1e-05, Method: Compositional matrix adjust.  
Identities = 30/88 (34%), Positives = 43/88 (49%), Gaps = 0/88 (0%)  
Frame = -3

Query 45 GHPGHNGAPGRDGRDGTTPGEKGEKGDPLIGPKGDIGETGVPGAEGPRGFPGIQGRKGEP 104  
 G G G G G G GEKGEKGD G G +G+ G+ G G +G +G G +G +GE  
 Sbjct 315729 GEKGDQGEKGDQGEKGDQGEKGEKGDQGEKGDQGEKGDQGEKGDQGEKGDQGEKGDQGEK 315550

Query 105 GEGAYVYRSAFSVGLETYVTIPNMPIRF 132  
 G+ ++ T + +M +R  
 Sbjct 315549 GDTTALFGFFRRKNASTPKNMEDMALRL 315466

Score = 45.4 bits (106), Expect = 2e-04, Method: Compositional matrix adjust.  
 Identities = 28/62 (45%), Positives = 34/62 (55%), Gaps = 0/62 (0%)  
 Frame = -3

Query 42 GIPGHPGHNGAPGRDGRDGTTPGEKGEKGDPLIGPKGDIGETGVPGAEGPRGFPGIQGRK 101  
 G G G G G G G GEKG++G+ G G KGD GE G G +G +G G QG K  
 Sbjct 315729 GEKGDQGEKGDQGEKGDQGEKGEKGDQGEKGDQGEKGDQGEKGDQGEKGDQGEKGDQGEK 315550

Query 102 GE 103  
 G+  
 Sbjct 315549 GD 315544

Score = 37.4 bits (85), Expect = 0.061, Method: Compositional matrix adjust.  
 Identities = 21/42 (50%), Positives = 27/42 (64%), Gaps = 0/42 (0%)  
 Frame = -3

Query 65 KGEKGDPLIGPKGDIGETGVPGAEGPRGFPGIQGRKGEPGE 106  
 KGEKGD G G +G+ G+ G G +G +G G QG KG+ GE  
 Sbjct 315732 KGEKGDQGEKGDQGEKGDQGEKGEKGDQGEKGDQGEKGDQGE 315607

>NC\_018285.1 Streptococcus phage YMC-2011, complete genome  
 Length=40758

Score = 48.5 bits (114), Expect = 1e-05, Method: Compositional matrix adjust.  
 Identities = 30/59 (51%), Positives = 37/59 (63%), Gaps = 6/59 (10%)  
 Frame = +2

Query 56 DGRDGTTPGEKGEKGDPLIGPKGDI---GETGVPGAEGPRGFPGIQGRKGEPGEGAYVY 111  
 DGR+G KG+KGDGP GPKGD GE G+ G +GP+G GI G KG G+ Y +  
 Sbjct 1409 DGRNGV---KGDKGDGPAGPKGDRGLQGERGLQGLQGPKGQDQIPGVKGADGKTQYTH 1576

Score = 38.9 bits (89), Expect = 0.017, Method: Compositional matrix adjust.  
 Identities = 26/56 (46%), Positives = 30/56 (54%), Gaps = 0/56 (0%)  
 Frame = +2

Query 42 GIPGHPGHNGAPGRDGRDGTTPGEKGEKGDPLIGPKGDIGETGVPGAEGPRGFPGI 97  
 G G G G PG G G G +GE+G GL GPKGD G GV GA+G + I  
 Sbjct 1412 GRNGVKGDKGDGPAGPKGDRGLQGERGLQGLQGPKGQDQIPGVKGADGKTQYTHI 1579

>NC\_023639.1 Mimivirus terra2 genome  
 Length=1168989

Score = 48.5 bits (114), Expect = 1e-05, Method: Compositional matrix adjust.  
 Identities = 31/65 (48%), Positives = 38/65 (58%), Gaps = 0/65 (0%)  
 Frame = -1

Query 42 GIPGHPGHNGAPGRDGRDGTTPGEKGEKGDPLIGPKGDIGETGVPGAEGPRGFPGIQGRK 101  
G G G G G G G G G+KGEKGD GL G KDIG+ G G +G RG G +G +  
Sbjct 645750 GSKGDKDIGQKGDKGTGDRGDKGEKGDAGLKGDKDIGQKGDKGIKDRGDKGTKGDR 645571

Query 102 GEPGE 106  
G+ G+  
Sbjct 645570 GDKGD 645556

Score = 48.5 bits (114), Expect = 2e-05, Method: Compositional matrix adjust.  
Identities = 32/65 (49%), Positives = 35/65 (54%), Gaps = 0/65 (0%)  
Frame = +1

Query 42 GIPGHPGHNGAPGRDGRDGTTPGEKGEKGDPLIGPKGDIGETGVPGAEGPRGFPGIQGRK 101  
G G G G G G G G GEKGEKGD G G KGD GE G+ G G G G +G K  
Sbjct 58972 GDNGEKGEKGDNGEKGEKGNNGEKGEKGDNGEKGEKGDNGEKGIKGDPGSNGSKGTKGEK 59151

Query 102 GEPGE 106  
GE G+  
Sbjct 59152 GEKGD 59166

Score = 47.8 bits (112), Expect = 2e-05, Method: Compositional matrix adjust.  
Identities = 28/61 (46%), Positives = 37/61 (61%), Gaps = 0/61 (0%)  
Frame = +1

Query 42 GIPGHPGHNGAPGRDGRDGTTPGEKGEKGDPLIGPKGDIGETGVPGAEGPRGFPGIQGRK 101  
G G G G+ G G +G G KG+KGDGP+ G KG+ G G G++G +G PGI+G  
Sbjct 57982 GEKGDKDGKSGKGTGKENGDKGNKGDKGDPIKGSKGEKGSKGDKSGDKGDPGIKGES 58161

Query 102 G 102  
G  
Sbjct 58162 G 58164

Score = 47.0 bits (110), Expect = 5e-05, Method: Compositional matrix adjust.  
Identities = 32/80 (40%), Positives = 44/80 (55%), Gaps = 2/80 (3%)  
Frame = +2

Query 27 VLLPLPKGACTGWMAGIPGHPGHNGAPGRDGRDGTTPGEKGEKGDPLIGPKGDIGETGVP 86  
L+ +GA G+ G PG NG+ G G G G+KG KG G G KGD G G+  
Sbjct 63305 TLVSNLRGAS--GAQGVKGDPGSNGSKGTKGEKGDKGDKSGKGVNGEKGEKGDAGLNGLD 63478

Query 87 GAEGPRGFPGIQGRKGEPGE 106  
G++G +G G +G KG+ G+  
Sbjct 63479 GSKGDKGDDGSKGSKGDKGD 63538

Score = 46.6 bits (109), Expect = 5e-05, Method: Compositional matrix adjust.  
Identities = 34/79 (43%), Positives = 39/79 (49%), Gaps = 3/79 (4%)  
Frame = +1

Query 40 MAGIPGHPGHNGAPGRDGRDGTTP---GEKGEKGDPLIGPKGDIGETGVPGAEGPRGFPG 96  
+ G G G NG G G G+ G+KG KGD G G KGD GETG+ G G F G  
Sbjct 3082 LKGSQGEKGENGQKGLKGESGSSAFKGDKSGKGDKNNGDKGDKGETGIKGESGSAVFKG 3261

Query 97 IQGRKGEPGEGAYVYRSAF 115

+G KGE G                  S F  
Sbjct 3262 DKGDKGETGTKGESGSSVF 3318

Score = 46.2 bits (108), Expect = 7e-05, Method: Compositional matrix adjust.  
Identities = 30/65 (46%), Positives = 36/65 (55%), Gaps = 0/65 (0%)  
Frame = +2

Query 42 GIPGHPGHNGAPGRDGRDGTTPGEKGEKGDPLIGPKGDIGETGVPGAEGPRGFPGIQGRK 101  
GI G G G G GR G G+KG+ GD G G KGDIG G G G +G G +G K  
Sbjct 1373 GIKGDKGSKGDKGDKGRKGDKGDIGDKGSKGDKGDIGAKGSKGDIGSKGSKGDKGSK 1552

Query 102 GEPGE 106  
G+ G+  
Sbjct 1553 GDKGD 1567

Score = 46.2 bits (108), Expect = 9e-05, Method: Compositional matrix adjust.  
Identities = 31/67 (46%), Positives = 38/67 (57%), Gaps = 3/67 (4%)  
Frame = +1

Query 42 GIPGHPGHNGAPGRDGRDGTTPGEKGEKGDPLIGPKG---DIGETGVPGAEGPRGFPGIQ 98  
G G PG G+ G G G G KG+KGDPG+ G G D G+ G G++G +G GI  
Sbjct 58054 GDKGDPGIKGSKEKGSKGDKGSKGDKGDPGIKGESGADADKGDGDKGSKGDKGDKGID 58233

Query 99 GRKGEPG 105  
G KGE G  
Sbjct 58234 GNKGEKG 58254

Score = 45.4 bits (106), Expect = 1e-04, Method: Compositional matrix adjust.  
Identities = 30/64 (47%), Positives = 38/64 (59%), Gaps = 0/64 (0%)  
Frame = +2

Query 42 GIPGHPGHNGAPGRDGRDGTTPGEKGEKGDPLIGPKGDIGETGVPGAEGPRGFPGIQGRK 101  
G G G +G G +G G G+KG KG+ GL G KGDIG+ G G++G G G +G K  
Sbjct 63827 GNKGDKGEDGLKGENDIGDKGDKGSKGEDGLKGDKGDIGDKGDKGSKGEDGLKGSKGDK 64006

Query 102 GEPG 105  
GE G  
Sbjct 64007 GEIG 64018

Score = 45.4 bits (106), Expect = 1e-04, Method: Compositional matrix adjust.  
Identities = 32/68 (47%), Positives = 39/68 (57%), Gaps = 3/68 (4%)  
Frame = +1

Query 42 GIPGHPGHNGAPGRDGRDGTTPGEKGEKGDPLIGPKGD---IGETGVPGAEGPRGFPGIQ 98  
G G G G PG +G GT GEKGEKGD G+ G KGD G+TG+ G G G +  
Sbjct 59080 GDNKEKGIKGDPSNGSKGKGTKEKGEKGDKGVNNGDKGDKGSKGDTGIKGEAGTAANKGDK 59259

Query 99 GRKGEPGE 106  
G KG+ G+  
Sbjct 59260 GSKGDKGD 59283

Score = 45.1 bits (105), Expect = 2e-04, Method: Compositional matrix adjust.  
Identities = 33/64 (52%), Positives = 36/64 (56%), Gaps = 0/64 (0%)

Frame = +2

Query 42 GIPGHPGHNGAPGRDGRDGTTPGEKGEKGDPLIGPKGDIGETGVPGAEGPRGFPGIQGRK 101  
G G+ G G G G DGT GEKGEKG G G KGD GE G+ G G G +G K  
Sbjct 63728 GEKGNKGDVGVKGGDDGKGEKGEKGTGDKGNKGDGKEDGLKGENGDIGDKGDKGSK 63907

Query 102 GEPG 105  
GE G  
Sbjct 63908 GEDG 63919

Score = 44.7 bits (104), Expect = 3e-04, Method: Compositional matrix adjust.  
Identities = 29/64 (45%), Positives = 37/64 (58%), Gaps = 0/64 (0%)  
Frame = +1

Query 42 GIPGHPGHNGAPGRDGRDGTTPGEKGEKGDPLIGPKGDIGETGVPGAEGPRGFPGIQGRK 101  
G G PG G G DG +G G+ GEKGD G G G+ G TG G +G +G G++G K  
Sbjct 3508 GDKGDPGKIGDKGSDGINGVKGDNKEKGDKGSKGDNGEKGSTGYNGEKSGKDNGLKGSK 3687

Query 102 GEPG 105  
G+ G  
Sbjct 3688 GDNG 3699

Score = 44.3 bits (103), Expect = 3e-04, Method: Compositional matrix adjust.  
Identities = 30/65 (46%), Positives = 40/65 (62%), Gaps = 3/65 (5%)  
Frame = +2

Query 45 GHPGHNGAPGRDGRDGTTPGEKGEKGDPLIGPKGDI---GETGVPGAEGPRGFPGIQGRK 101  
G G G+ G DG G+ G+KGE G+ G G KGDI G+ G G +G +G PG++G K  
Sbjct 63944 GDKGDKGSKGEDGLKGSKGDKEIGNKGDGDKGDKDIGIKGDKDIGDKGDKDPGLKGEK 64123

Query 102 GEPGE 106  
GE G+  
Sbjct 64124 GEKGD 64138

Score = 44.3 bits (103), Expect = 4e-04, Method: Compositional matrix adjust.  
Identities = 31/64 (48%), Positives = 35/64 (55%), Gaps = 0/64 (0%)  
Frame = +1

Query 42 GIPGHPGHNGAPGRDGRDGTTPGEKGEKGDPLIGPKGDIGETGVPGAEGPRGFPGIQGRK 101  
G G G G G G G +KGEKGD G G KG GE G G +G +G PGI+G K  
Sbjct 57910 GDKGDKGEIGIQGLKGESGADADKGEKGDGDKGSKGKTKGENGDGKGNKGDGDPGKGSK 58089

Query 102 GEPG 105  
GE G  
Sbjct 58090 GEKG 58101

Score = 43.9 bits (102), Expect = 5e-04, Method: Compositional matrix adjust.  
Identities = 28/64 (44%), Positives = 36/64 (56%), Gaps = 0/64 (0%)  
Frame = -3

Query 43 IPGHPGHNGAPGRDGRDGTTPGEKGEKGDPLIGPKGDIGETGVPGAEGPRGFPGIQGRKG 102  
I G G G G G G G +KG++GD G +G KGD G+TG G G +G G G KG  
Sbjct 801097 IKGEKGDQGDKGDGTSKGDQGDGDKGDVGDGDKGDKGDTGSKGDVGDGDKGDVGDGDKG 800918

Query 103 EPGE 106  
+ G+  
Sbjct 800917 DTGD 800906

Score = 43.5 bits (101), Expect = 5e-04, Method: Compositional matrix adjust.  
Identities = 30/69 (43%), Positives = 39/69 (57%), Gaps = 0/69 (0%)  
Frame = +3

Query 42 GIPGHPGHNGAPGRDGRDGTPEKGEKGDPLIGPKGDIGETGVPGAEGPRGFPGIQGRK 101  
G G G NG+ G G G G KG KGD G G KGD+G+TG+ G++G +G G +G  
Sbjct 61644 GDKGSKGDNGSKGESGDKGIFGLKGSKGDIGDKGEKGDLDGTGLKGSKGLKGSKGDKGLV 61823

Query 102 GEPGEGAYV 110  
GE +V  
Sbjct 61824 NVKGENGFV 61850

Score = 43.5 bits (101), Expect = 6e-04, Method: Compositional matrix adjust.  
Identities = 30/62 (48%), Positives = 34/62 (55%), Gaps = 0/62 (0%)  
Frame = -1

Query 45 GHPGHNGAPGRDGRDGTPEKGEKGDPLIGPKGDIGETGVPGAEGPRGFPGIQGRKGE 104  
G G G G G G PG+KGEKGD G G KGD G+ G G +G G G G KG+  
Sbjct 647424 GEKGDKGDLDGEKGEKGDPGQKGEKGDKGFDFDKGDIGEKGDIGDKGESGDKGDV 647245

Query 105 GE 106  
GE  
Sbjct 647244 GE 647239

Score = 43.5 bits (101), Expect = 6e-04, Method: Compositional matrix adjust.  
Identities = 31/71 (44%), Positives = 38/71 (54%), Gaps = 6/71 (8%)  
Frame = +1

Query 42 GIPGHPGHNGAPGRDGRDGTPEKGEKGDPLIGPKG-----DIGETGVPGAEGPRGF 95  
GI G+ G G G G G KG+KGD G+ G KG D GETG+ G G +G  
Sbjct 4369 GIKGNKGDKGTQGIKGESGQAANKGDKDKGIKGDKNKGNKGDKGETGIKGNIGEKGLN 4548

Query 96 GIQGRKGEPE 106  
G +G KG+ GE  
Sbjct 4549 GDKGIKGDKGE 4581

Score = 43.5 bits (101), Expect = 6e-04, Method: Compositional matrix adjust.  
Identities = 29/64 (45%), Positives = 35/64 (55%), Gaps = 0/64 (0%)  
Frame = +1

Query 42 GIPGHPGHNGAPGRDGRDGTPEKGEKGDPLIGPKGDIGETGVPGAEGPRGFPGIQGRK 101  
G G G G+ G G G G+KG KGD G+ G KGD G G G +G +G G +G K  
Sbjct 4819 GSKGDKGEKGSKGDKNKGDNGDKGVKGDKNKGDKNIGFKGDKGSKGDKDKGIK 4998

Query 102 GEPG 105  
GE G  
Sbjct 4999 GEKG 5010

Score = 43.5 bits (101), Expect = 6e-04, Method: Compositional matrix adjust.



Identities = 32/70 (46%), Positives = 39/70 (56%), Gaps = 3/70 (4%)  
Frame = +1

Query 42 GIPGHPGHNGAPGRDGRDGTTPGE---KGEKGDPLIGPKGDIGETGVPGAEGPRGFPGIQ 98  
G G G G+ G +G G+ G+ KG KGD GL G KGD G G G +G +G G +  
Sbjct 3598 GSKGDNGEKGSTGYNGEKGSKGDNGLKGSKGDNGLKGSKGDNGLKGNKGVKGNKGDKGSK 3777

Query 99 GRKGEPGEGA 108  
G KG GEGA  
Sbjct 3778 GDKGNSGEGA 3807

Score = 43.1 bits (100), Expect = 9e-04, Method: Compositional matrix adjust.  
Identities = 28/61 (46%), Positives = 35/61 (57%), Gaps = 0/61 (0%)  
Frame = -1

Query 45 GHPGHNGAPGRDGRDGTTPGEKGEKGDPLIGPKGDIGETGVPGAEGPRGFPGIQGRKGEP 104  
G G G PG+ G G G+ G+KGD G IG KGD G+ G G G +G G +G KG+  
Sbjct 647397 GEKGEKGDPGQKGEKGDKDFGDKGDKDIGEKGDKGDIGDKGESGDKGDVGEKGDKGDK 647218

Query 105 G 105  
G  
Sbjct 647217 G 647215

Score = 43.1 bits (100), Expect = 0.001, Method: Compositional matrix adjust.  
Identities = 30/64 (47%), Positives = 34/64 (53%), Gaps = 0/64 (0%)  
Frame = +1

Query 42 GIPGHPGHNGAPGRDGRDGTTPGEKGEKGDPLIGPKGDIGETGVPGAEGPRGFPGIQGRK 101  
G G G G G G G GEKG KGD GL G KGD G G G G +G G++G K  
Sbjct 3580 GEKGDKGSKGDNGEKGSTGYNGEKGSKGDNGLKGSKGDNGLKGSKGDNGLKGNKGVKGNK 3759

Query 102 GEPG 105  
G+ G  
Sbjct 3760 GDKG 3771

Score = 42.7 bits (99), Expect = 0.001, Method: Compositional matrix adjust.  
Identities = 30/65 (46%), Positives = 38/65 (58%), Gaps = 0/65 (0%)  
Frame = +2

Query 42 GIPGHPGHNGAPGRDGRDGTTPGEKGEKGDPLIGPKGDIGETGVPGAEGPRGFPGIQGRK 101  
G G G +G G G G G+KG KG+ GL G KGD GE G G +G +G GI+G K  
Sbjct 63890 GDKGSKGEDGLKGDKGDIGDKGDKGSKGEDGLKGSKGDKGEIGNKGDKGDIGIKGDK 64069

Query 102 GEPGE 106  
G+ G+  
Sbjct 64070 GDIGD 64084

Score = 42.7 bits (99), Expect = 0.001, Method: Compositional matrix adjust.  
Identities = 29/65 (45%), Positives = 37/65 (57%), Gaps = 0/65 (0%)  
Frame = +1

Query 42 GIPGHPGHNGAPGRDGRDGTTPGEKGEKGDPLIGPKGDIGETGVPGAEGPRGFPGIQGRK 101  
G G G+ G+ G G G+ G+KG KGD G G KGD G G G +G GF G +G K  
Sbjct 4792 GNKGDKGNKGSKGDKGEKGSKGDKNKGDNDKGVKGDKGMKGDKGDKNIGFKGDKGSK 4971

Query 102 GEPGE 106  
G+ G+  
Sbjct 4972 GDKGD 4986

Score = 42.7 bits (99), Expect = 0.001, Method: Compositional matrix adjust.  
Identities = 29/62 (47%), Positives = 35/62 (56%), Gaps = 0/62 (0%)  
Frame = +2

Query 44 PGHPGHNGAPGRDGRDGTTPGEKGEKGDPLIGPKGDIGETGVPGAEGPRGFPPGIQGRKGE 103  
G G+ G+ G G G GEKG KG+ G G KGD G G G +G +GF G +G KGE  
Sbjct 1136 KGIKNTGSKGDKGSKGDKGEKGSKGNKGDKGEKGDKGSKGEKGFKEKGFKEKGIKGE 1315

Query 104 PG 105  
G  
Sbjct 1316 KG 1321

Score = 42.7 bits (99), Expect = 0.001, Method: Compositional matrix adjust.  
Identities = 29/65 (45%), Positives = 35/65 (54%), Gaps = 0/65 (0%)  
Frame = +2

Query 42 GIPGHPGHNGAPGRDGRDGTTPGEKGEKGDPLIGPKGDIGETGVPGAEGPRGFPPGIQGRK 101  
G G G G G G G G+KGEKGD G G KG GE G G +G +G G +G K  
Sbjct 1157 GSKGDKGSKGDKGEKGSKGNKGDKGEKGDKGSKGEKGFKEKGFKEKGIKGEKGSKGSK 1336

Query 102 GEPGE 106  
G+ G+  
Sbjct 1337 GDKGD 1351

Score = 42.4 bits (98), Expect = 0.001, Method: Compositional matrix adjust.  
Identities = 30/68 (44%), Positives = 35/68 (51%), Gaps = 0/68 (0%)  
Frame = -1

Query 42 GIPGHPGHNGAPGRDGRDGTTPGEKGEKGDPLIGPKGDIGETGVPGAEGPRGFPPGIQGRK 101  
G G G G G G G GEKGEKGD G IG KGD G+T G +G +G G +G  
Sbjct 646713 GEKGEKGDKGDIGEKGNKGDIGEKGEKGDKGDIGEKGDKGDTSKGDKGDKEKGDKGD 646534

Query 102 GEPGEGAY 109  
G+ Y  
Sbjct 646533 SSKGDKGY 646510

Score = 42.4 bits (98), Expect = 0.001, Method: Compositional matrix adjust.  
Identities = 29/64 (45%), Positives = 36/64 (56%), Gaps = 0/64 (0%)  
Frame = +3

Query 40 MAGIPGHPGHNGAPGRDGRDGTTPGEKGEKGDPLIGPKGDIGETGVPGAEGPRGFPPGIQ 99  
+ G PG+ G +G G +G G+ GE G KGD G G G G G G+G G GIQG  
Sbjct 61224 IKGDPGNKGEDGIKGTNGLKGSKGETGSKGDDGTGKITGLKGTGNSGSKGDDGDKGIQG 61403

Query 100 RKGE 103  
KGE  
Sbjct 61404 LKGE 61415





Query 102 GEPGE 106  
G+ GE  
Sbjct 645687 GDKGE 645673

Score = 41.2 bits (95), Expect = 0.003, Method: Compositional matrix adjust.  
Identities = 30/65 (46%), Positives = 36/65 (55%), Gaps = 0/65 (0%)  
Frame = +1

Query 42 GIPGHPGHNGAPGRDGRDGTPEKEKGEKGDPLIGPKGDIGETGVPGAEGPRGFPGIQGRK 101  
G G G+ G G G G KG+KGD G IG KGD G G G +G +G GI+G K  
Sbjct 4846 GSKGDKGNKGDNGDKGVKGDGMKGDGDKGNIGFKGDKGSKGDKGDKGIKGEKGIKGDK 5025

Query 102 GEPGE 106  
G G+  
Sbjct 5026 GTKGD 5040

Score = 41.2 bits (95), Expect = 0.003, Method: Compositional matrix adjust.  
Identities = 29/65 (45%), Positives = 33/65 (51%), Gaps = 0/65 (0%)  
Frame = +3

Query 42 GIPGHPGHNGAPGRDGRDGTPEKEKGEKGDPLIGPKGDIGETGVPGAEGPRGFPGIQGRK 101  
G G G G G G G PG KGE G G G KG GETG G +G +G G++G K  
Sbjct 61176 GTKGDDGIKGIIGSKGIKGDGPNKGEDGIKGTNGLKGSKGETGSKGDDGKGITGLKGTK 61355

Query 102 GEPGE 106  
G G  
Sbjct 61356 GNSGS 61370

Score = 41.2 bits (95), Expect = 0.004, Method: Compositional matrix adjust.  
Identities = 31/65 (48%), Positives = 33/65 (51%), Gaps = 3/65 (5%)  
Frame = +1

Query 45 GHPGHNGAPGRDGRDGTPEKEKGEKGDPLIGPKGDIGETGVPGAEGPRGF---PGIQGRK 101  
G G G G G G GEKGEK+ G G KGD GE G G G +G PG G K  
Sbjct 58954 GDKGEKGDNGEKGEKGDNGEKGEKGNNGEKGEKGDNGEKGEKGDNGEKGIKGDGPGSNGSK 59133

Query 102 GEPGE 106  
G GE  
Sbjct 59134 GTKGE 59148

Score = 41.2 bits (95), Expect = 0.004, Method: Compositional matrix adjust.  
Identities = 31/79 (39%), Positives = 40/79 (51%), Gaps = 12/79 (15%)  
Frame = +3

Query 40 MAGIPGHPGHNGAPGRDGRDGTPEKEKGEKGDPLIGPKGDIGETGVPGAEGPRGFPG--- 96  
+ GI G G G PG G +G G KG KG G +G KGD G G+ G++G +G PG  
Sbjct 61071 IKGITGSKGFKGDPGKENGINGTKLGLKGSQGDLDGDKGDDGIKGIIGSKGIKGDGPNKG 61250

Query 97 -----IQGRKGEPGE 106  
++G KGE G  
Sbjct 61251 EDGIKGTNGLKGSKGETGS 61307

Score = 40.8 bits (94), Expect = 0.004, Method: Compositional matrix adjust.  
Identities = 27/65 (42%), Positives = 37/65 (57%), Gaps = 0/65 (0%)  
Frame = +1

Query 42 GIPGHPGHNGAPGRDGRDGTTPGEKGEKGDPLIGPKGDIGETGVPGAEGPRGFPGIQGRK 101  
G G+ G NG G G G G+KG+KG+ G G KG G+ G G +G +G G +G K  
Sbjct 4855 GDKGNKGDNGDKGVKGDKGMKGDKGNIGFKGDKGSKGDKGDKGIKGEKGIKGDKGTK 5034

Query 102 GEPGE 106  
G+ G+  
Sbjct 5035 GDKGD 5049

Score = 40.8 bits (94), Expect = 0.004, Method: Compositional matrix adjust.  
Identities = 31/65 (48%), Positives = 35/65 (54%), Gaps = 0/65 (0%)  
Frame = -1

Query 42 GIPGHPGHNGAPGRDGRDGTTPGEKGEKGDPLIGPKGDIGETGVPGAEGPRGFPGIQGRK 101  
G G G G G G G G GEKGEKGDGP G KGD G+ G G +G G G +G  
Sbjct 647460 GEKGEKGDKGDIGEKGDKDLGEKGEKGDPPQKGEKGDKGDGDFGDKGDKDIGEKGDKDI 647281

Query 102 GEPGE 106  
G+ GE  
Sbjct 647280 GDKGE 647266

Score = 40.8 bits (94), Expect = 0.004, Method: Compositional matrix adjust.  
Identities = 30/64 (47%), Positives = 36/64 (56%), Gaps = 0/64 (0%)  
Frame = +2

Query 42 GIPGHPGHNGAPGRDGRDGTTPGEKGEKGDPLIGPKGDIGETGVPGAEGPRGFPGIQGRK 101  
G+ G G G G G G G KG KGD G IG KGD G+ G G +G +G G +G K  
Sbjct 63917 GLKGDKGDIGDKGDKGSKGEDGLKGSKGDKEIGNKGDKGDIGIKGDKDIGDKGDK 64096

Query 102 GEPG 105  
G+PG  
Sbjct 64097 GDPG 64108

Score = 40.8 bits (94), Expect = 0.005, Method: Compositional matrix adjust.  
Identities = 26/64 (41%), Positives = 35/64 (55%), Gaps = 0/64 (0%)  
Frame = +1

Query 42 GIPGHPGHNGAPGRDGRDGTTPGEKGEKGDPLIGPKGDIGETGVPGAEGPRGFPGIQGRK 101  
G G G+NG G G +G GEKG+ G+ G+ G G G G G +G +G G+ G K  
Sbjct 59008 GEKGEKGNNGEKGEKGDNGEKGEKGDNGEKGIKGDPPSNGSKGTKGEKGEKGDKGVNGDK 59187

Query 102 GEPG 105  
G+ G  
Sbjct 59188 GDKG 59199

Score = 40.8 bits (94), Expect = 0.005, Method: Compositional matrix adjust.  
Identities = 28/56 (50%), Positives = 34/56 (61%), Gaps = 3/56 (5%)  
Frame = -1

Query 51 GAPGRDGRDGTTPGEKGEKGDPLIGPKGDIGETGVPGAEGPRGFPGIQGRKGEPE 106  
G G G G GEKGEKGD G IG KGD G+ G +G +G PG +G KG+ G+

Sbjct 647496 GEKGEKGDKGDIGEKGEKGDKGDIGEKGDKGDLDL---GEKGEKGDGPGQKGEKGDKGD 647338

Score = 40.8 bits (94), Expect = 0.005, Method: Compositional matrix adjust.  
Identities = 27/62 (44%), Positives = 34/62 (55%), Gaps = 0/62 (0%)  
Frame = +2

Query 44 PGHPGHNGAPGRDGRDGTGPEKGEKGDPLIGPKGDIGETGVPGAEGPRGFPGIQRKGE 103  
G G G G G +G G+KG+KG+ G G KGDIG G+ G G F G +G KG+  
Sbjct 713 KGEKGSKGDKGYKGDDEGIKGDKGDKNKGDKGDIGSQGIKGESGSAVFKGDGKTKGD 892

Query 104 PG 105  
G  
Sbjct 893 KG 898

Score = 40.4 bits (93), Expect = 0.006, Method: Compositional matrix adjust.  
Identities = 26/67 (39%), Positives = 38/67 (57%), Gaps = 0/67 (0%)  
Frame = +1

Query 40 MAGIPGHNGAPGRDGRDGTGPEKGEKGDPLIGPKGDIGETGVPGAEGPRGFPGIQRG 99  
+ G+ G G + G G G G KG KG+ G G KGD G+ G+ G++G +G G +G  
Sbjct 57940 IQGLKGESGADADKGEKGDKGDKGSKGTGKENGDKGNKGDKGDGPGIKGSKGEKGSKGDGK 58119

Query 100 RKGEPGE 106  
KG+ G+  
Sbjct 58120 SKGDKGD 58140

Score = 40.4 bits (93), Expect = 0.006, Method: Compositional matrix adjust.  
Identities = 29/67 (43%), Positives = 36/67 (54%), Gaps = 0/67 (0%)  
Frame = +1

Query 40 MAGIPGHNGAPGRDGRDGTGPEKGEKGDPLIGPKGDIGETGVPGAEGPRGFPGIQRG 99  
+ G G + G G G G G KG KGD G G KG+IGE G+ G +G +G G G  
Sbjct 4408 IKGESGQAANKGDKGDGKGIKGDKNKGNKGDKGETGKGNIGEKGLNGDKGIKGDKGETG 4587

Query 100 RKGEPGE 106  
KG+ GE  
Sbjct 4588 TKGDIGE 4608

Score = 40.4 bits (93), Expect = 0.006, Method: Compositional matrix adjust.  
Identities = 30/65 (46%), Positives = 34/65 (52%), Gaps = 0/65 (0%)  
Frame = -1

Query 42 GIPGHNGAPGRDGRDGTGPEKGEKGDPLIGPKGDIGETGVPGAEGPRGFPGIQRK 101  
GI G G G G G G GEKG KGD G G KGD G+ G G +G G +G K  
Sbjct 646740 GIKGDKGDIGEKGEKGDKGDIGEKGNKGDIGEKGEKGDKGDIGEKGDKGDTSKGDGKDK 646561

Query 102 GEPGE 106  
GE G+  
Sbjct 646560 GEKGD 646546

Score = 40.4 bits (93), Expect = 0.006, Method: Compositional matrix adjust.  
Identities = 30/67 (45%), Positives = 35/67 (52%), Gaps = 3/67 (4%)  
Frame = +1

Query 43 IPGHPGHNGAPGRDGRDGTTPGEKGEKGDPLG---IGPKGDIGETGVPGAEGPRGFPGIQQ 99  
I G G G G G G +KGEKGDPG G KGD G+TG+ G G G +G  
Sbjct 58678 IKGDKGSKGD TGLKGESGADADKGEKGD PGNKGD KGSKGD KGD TGLKGESGADADKGD K 58857

Query 100 RKGEPGE 106  
KGE G+  
Sbjct 58858 DKGEKGD 58878

Score = 40.0 bits (92), Expect = 0.007, Method: Compositional matrix adjust.  
Identities = 22/40 (55%), Positives = 28/40 (70%), Gaps = 0/40 (0%)  
Frame = +2

Query 63 GEKGEKGDPLIGPKGDIGETGVPGAEGPRGFPGIQGRKG 102  
G KG KGD G G KGD+G+TG+ G +G +G PGI+G G  
Sbjct 64700 GTKGVKGD KGSKGD KGD LGDTGIKGD KGEKGD PGIKGEAG 64819

Score = 40.0 bits (92), Expect = 0.008, Method: Compositional matrix adjust.  
Identities = 28/65 (43%), Positives = 35/65 (54%), Gaps = 0/65 (0%)  
Frame = +2

Query 42 GIPGHPGHNGAPGRDGRDGTTPGEKGEKGDPLIGPKGDIGETGVPGAEGPRGFPGIQGRK 101  
G G G G G G G GEKG KG G G KG G+ G+ G +G +G G +GRK  
Sbjct 1247 GSKGEKGF KGEKGF KGEKGIKGEKGS KGSKGD KGD KGF KGD KGIKGD KGSKGD KGD KGRK 1426

Query 102 GEPGE 106  
G+ G+  
Sbjct 1427 GDKGD 1441

Score = 40.0 bits (92), Expect = 0.008, Method: Compositional matrix adjust.  
Identities = 29/65 (45%), Positives = 34/65 (52%), Gaps = 0/65 (0%)  
Frame = +1

Query 42 GIPGHPGHNGAPGRDGRDGTTPGEKGEKGDPLIGPKGDIGETGVPGAEGPRGFPGIQGRK 101  
G G G G G G G GEKGEKGD G G KGD G G G +G +G G +G  
Sbjct 58999 GDNKEKGEKGNNGEKGEKGDNGEKGEKGDNGEKGIKGD PGSNGSKGT KGEKGEKGD KGVN 59178

Query 102 GEPGE 106  
G+ G+  
Sbjct 59179 GDKGD 59193

Score = 40.0 bits (92), Expect = 0.008, Method: Compositional matrix adjust.  
Identities = 30/64 (47%), Positives = 34/64 (53%), Gaps = 3/64 (5%)  
Frame = -1

Query 43 IPGHPGHNGAPGRDGRDGTTPGEKGEKGDPLIGPKGDIGETGVPGAEGPRGFPGIQGRKG 102  
I G G G G G GT GEKGD G G KGDIG+ G G +G RG GI+G G  
Sbjct 645918 IKGD KGEKGD KGN TGD KGT S---GEKGD LGS KGEKGDIG QKGD KGD KGD RGD RGIKGDIG 645748

Query 103 EPGE 106  
G+  
Sbjct 645747 SKGD 645736



Score = 40.0 bits (92), Expect = 0.009, Method: Compositional matrix adjust.  
Identities = 27/50 (54%), Positives = 31/50 (62%), Gaps = 0/50 (0%)  
Frame = -1

Query 57 GRDGTTPGEKGEKGDPLIGPKGDIGETGVPGAEGPRGFPGIQGRKGEPE 106  
G G GEKG KGD G G KGDIG+ G G +G G GI+G KG+ GE  
Sbjct 646857 GNKGDIGEKGNKGDIGEKGNKGDIGDKGEKGDKGDIGDKGIKGDKGDIGE 646708

Score = 40.0 bits (92), Expect = 0.009, Method: Compositional matrix adjust.  
Identities = 28/61 (46%), Positives = 33/61 (54%), Gaps = 0/61 (0%)  
Frame = +1

Query 45 GHPGHNGAPGRDGRDGTTPGEKGEKGDPLIGPKGDIGETGVPGAEGPRGFPGIQGRKGEPE 104  
G G G+ G G G KGEKG G G KGDIG G GA+ +G G +G KG+  
Sbjct 58180 GDKGDKGSKGDKGDKGIDGNKGEKGSKGDGDKGDKGIDGLKGESGADADKGDGDKGSKGDK 58359

Query 105 G 105  
G  
Sbjct 58360 G 58362

Score = 40.0 bits (92), Expect = 0.009, Method: Compositional matrix adjust.  
Identities = 29/62 (47%), Positives = 36/62 (58%), Gaps = 0/62 (0%)  
Frame = -1

Query 42 GIPGHPGHNGAPGRDGRDGTTPGEKGEKGDPLIGPKGDIGETGVPGAEGPRGFPGIQGRK 101  
G G G +G G G G GEKGEKGD G IG KG+ G+ G G +G +G G +G K  
Sbjct 646776 GEKGDGKIDGDKGIKGDGDKGIDIGEKGEKGDGDKGIDIGEKGNKGDIGEKGEKGDGDKGIDIGEKGDK 646597

Query 102 GE 103  
G+  
Sbjct 646596 GD 646591

Score = 39.7 bits (91), Expect = 0.010, Method: Compositional matrix adjust.  
Identities = 27/65 (42%), Positives = 35/65 (54%), Gaps = 0/65 (0%)  
Frame = +2

Query 42 GIPGHPGHNGAPGRDGRDGTTPGEKGEKGDPLIGPKGDIGETGVPGAEGPRGFPGIQGRK 101  
G G G G+ G G G G+KG KG+ G G KG GE G+ G +G +G G +G K  
Sbjct 1175 GSKGDKGEKGSKGNKGDGDKGDKGSKGEKGFKGEKGFKGEKGIKGEKGSKGSKGDGDKDK 1354

Query 102 GEPGE 106  
G G+  
Sbjct 1355 GFKGD 1369

Score = 39.7 bits (91), Expect = 0.011, Method: Compositional matrix adjust.  
Identities = 31/65 (48%), Positives = 35/65 (54%), Gaps = 0/65 (0%)  
Frame = -1

Query 42 GIPGHPGHNGAPGRDGRDGTTPGEKGEKGDPLIGPKGDIGETGVPGAEGPRGFPGIQGRK 101  
G G G G G G G GEKG+KGD G G KGDIGE G G G +G G +G  
Sbjct 647424 GEKGDGKDLGEKGEKGDGPGQKGEKGDGKDFGDKGDKGIDIGEKGDGDKGIDGDKGESGDKGDV 647245

Query 102 GEPGE 106  
GE G+



Query 99 GRKGEPEGE 106  
G GE GE  
Sbjct 646659 GDIGEKGE 646636

Score = 39.3 bits (90), Expect = 0.014, Method: Compositional matrix adjust.  
Identities = 30/70 (43%), Positives = 35/70 (50%), Gaps = 3/70 (4%)  
Frame = +1

Query 40 MAGIPGHPGHNGAPGRDGRDGTPEGE---GEKGDPLIGPKGDIGETGVPGAEGPRGFPG 96  
+ G G G G G G D GEK G KGD G G KGD G G GA+ +G G  
Sbjct 58678 IKGDKGSKGDGTGLKGESGADADKGEKGDPGNKGDKGSKGDGTGLKGESGADADKGDGK 58857

Query 97 IQGRKGEPEGE 106  
+G KG+ GE  
Sbjct 58858 DKGEKGDKGE 58887

Score = 39.3 bits (90), Expect = 0.015, Method: Compositional matrix adjust.  
Identities = 28/65 (43%), Positives = 36/65 (55%), Gaps = 0/65 (0%)  
Frame = +2

Query 42 GIPGHPGHNGAPGRDGRDGTPEGEKGEKGDPLIGPKGDIGETGVPGAEGPRGFPGIQGRK 101  
G G G+ G G G G+ GEKG KG+ G G KG GE G G++G +G G +G K  
Sbjct 1193 GEKGSKGNKGDKGEKGDKGSKGEKGFKEKGFKEKGIKGEKGSKGSKGDKGDKGFKEKGD 1372

Query 102 GEPGE 106  
G G+  
Sbjct 1373 GIKGD 1387

Score = 39.3 bits (90), Expect = 0.016, Method: Compositional matrix adjust.  
Identities = 29/65 (45%), Positives = 33/65 (51%), Gaps = 0/65 (0%)  
Frame = +2

Query 42 GIPGHPGHNGAPGRDGRDGTPEGEKGEKGDPLIGPKGDIGETGVPGAEGPRGFPGIQGRK 101  
G G G G G G G GE G KG+ G IG KGD G G G +G +G G +G K  
Sbjct 63782 GTKGEKGEKGTGKGDKNKGDKGEDGLKGENGDIGDKGDKGSKGEDGLKGDIGDKGD 63961

Query 102 GEPGE 106  
G GE  
Sbjct 63962 GSKGE 63976

Score = 39.3 bits (90), Expect = 0.016, Method: Compositional matrix adjust.  
Identities = 28/65 (43%), Positives = 35/65 (54%), Gaps = 0/65 (0%)  
Frame = +1

Query 42 GIPGHPGHNGAPGRDGRDGTPEGEKGEKGDPLIGPKGDIGETGVPGAEGPRGFPGIQGRK 101  
G G G G G G D G+KG+KG G G KGDIG G GA+ +G G +G K  
Sbjct 58261 GDKGDKGDIGLKGESGADADKGDKGDKGSKGDKNKGDIGPKGESGADADKGDKGDKGSK 58440

Query 102 GEPGE 106  
G+ G+  
Sbjct 58441 GDKGD 58455

Score = 39.3 bits (90), Expect = 0.016, Method: Compositional matrix adjust.  
Identities = 28/60 (47%), Positives = 32/60 (53%), Gaps = 0/60 (0%)  
Frame = +2

Query 46 HPGHNGAPGRDGRDGTTPGEKGEKGDPLIGPKGDIGETGVPGAEGPRGFPGIQGRKGEPG 105  
G G G G G GEKG KGD G +G KGD G G G +G +G G +G KGE G  
Sbjct 63677 SKGDKGITGDKGDKGEIAGEKGNKGDGKDVGVKGGDDGKGEKGEKGTGDKGNKGDKGEDG 63856

Score = 39.3 bits (90), Expect = 0.017, Method: Compositional matrix adjust.  
Identities = 27/65 (42%), Positives = 35/65 (54%), Gaps = 0/65 (0%)  
Frame = +2

Query 42 GIPGHPGHNGAPGRDGRDGTTPGEKGEKGDPLIGPKGDIGETGVPGAEGPRGFPGIQGRK 101  
G G G G G G G+ G KG+KGD G G KG G+ G G +G +G G +G K  
Sbjct 1265 GFKGEKGFKEKGIKGEKSKGSKGDKGDKGFKGDKGIKGDGSKGDKGDKGRKGDGDK 1444

Query 102 GEPGE 106  
G+ G+  
Sbjct 1445 GDIGD 1459

Score = 38.9 bits (89), Expect = 0.018, Method: Compositional matrix adjust.  
Identities = 29/66 (44%), Positives = 34/66 (52%), Gaps = 1/66 (2%)  
Frame = +1

Query 44 PGHPGHNGAPGRDGRDGTTPGEKGEKGDPLIGPKGDIGETGVPGAEGPRGFPGIQGRKGE 103  
G G G G +G G G KG+KGDPG+ G KG G GV G G +G G +G GE  
Sbjct 3445 KGDKGDKGNSG-EGDKGDKGTGDKGDPGIKGDGKSDGINGVKGDNGEKGDGKSGKDN 3621

Query 104 PEGAY 109  
G Y  
Sbjct 3622 KGSTGY 3639

Score = 38.9 bits (89), Expect = 0.020, Method: Compositional matrix adjust.  
Identities = 28/66 (42%), Positives = 34/66 (52%), Gaps = 0/66 (0%)  
Frame = +1

Query 40 MAGIPGHPGHNGAPGRDGRDGTTPGEKGEKGDPLIGPKGDIGETGVPGAEGPRGFPGIQG 99  
+ G G G G G G+ G KGE GD G G KGD G G G +G +G G +G  
Sbjct 57949 LKGESGADADKGEKGDGDKGSKGTGKENGDKGNKGDGDPGIKSGKGEKSGKDKGSKG 58128

Query 100 RKGEPE 105  
KG+PG  
Sbjct 58129 DKGDPE 58146

Score = 38.9 bits (89), Expect = 0.020, Method: Compositional matrix adjust.  
Identities = 25/66 (38%), Positives = 33/66 (50%), Gaps = 0/66 (0%)  
Frame = -1

Query 65 KGEKGDPLIGPKGDIGETGVPGAEGPRGFPGIQGRKGEPEGAYVYRSAFEVGLETYVT 124  
KG+KGD G+ G KGD GE G G +G +G PG KGE G+ + S+  
Sbjct 646194 KGDKGDKGINGNKGDGKGEKGDGKGNPPTNAGKGEKGDGDKGDAGTSILFGQGAP 646015

Query 125 IPNMPI 130  
PN +

Sbjct 646014 DPNQGV 645997

Score = 38.9 bits (89), Expect = 0.020, Method: Compositional matrix adjust.  
Identities = 29/64 (45%), Positives = 34/64 (53%), Gaps = 0/64 (0%)  
Frame = +1

Query 42 GIPGHPGHNGAPGRDGRDGTTPGEKGEKGDPLIGPKGDIGETGVPGAEGPRGFPGIQRK 101  
G G G G G D G G+KG KGD G G KG+ G G G +G +G GI+G K  
Sbjct 58360 GNKGDIGPKGESGADADKGDGDKGSKGDGDKGTGKESGLIGTKGDGDKGDEGIKGDK 58539

Query 102 GEPG 105  
GE G  
Sbjct 58540 GEAG 58551

Score = 38.9 bits (89), Expect = 0.020, Method: Compositional matrix adjust.  
Identities = 28/69 (41%), Positives = 39/69 (57%), Gaps = 3/69 (4%)  
Frame = -1

Query 40 MAGIPGHPGHNGAPGRDGRDGTTPGEKGEKGDPL---IGPKGDIGETGVPGAEGPRGFPG 96  
+G G G G G G+ G G+KG++GD G+ IG KGD G+ G G +G +G G  
Sbjct 645864 TSGEKGDLSKGEKGDIGQKGDGDKGDRGRGIKGDIGSKGDKGDIGQKGDGDKGTGDRG 645685

Query 97 IQGRKGEPG 105  
+G KG+ G  
Sbjct 645684 DKGEKGDAG 645658

Score = 38.9 bits (89), Expect = 0.020, Method: Compositional matrix adjust.  
Identities = 28/64 (44%), Positives = 36/64 (56%), Gaps = 0/64 (0%)  
Frame = +1

Query 45 GHPGHNGAPGRDGRDGTTPGEKGEKGDPLIGPKGDIGETGVPGAEGPRGFPGIQRKGEP 104  
G G G G G G+ G+KG+KG+ G G KGD G+ G G G GF G +G KGE  
Sbjct 950218 GLKGSQGDQGYKGDQGSKGDGKQKGEFGNAGFKGDGDMGQKGESGNGVFKGDKGDKGEG 950397

Query 105 GEGA 108  
+G+  
Sbjct 950398 SKGS 950409

Score = 38.9 bits (89), Expect = 0.021, Method: Compositional matrix adjust.  
Identities = 28/65 (43%), Positives = 37/65 (57%), Gaps = 0/65 (0%)  
Frame = +1

Query 42 GIPGHPGHNGAPGRDGRDGTTPGEKGEKGDPLIGPKGDIGETGVPGAEGPRGFPGIQRK 101  
G G+ G G G G D G+KG+KG G G KG GE+G+ G +G +G G +G K  
Sbjct 58351 GDKGNKGDIGPKGESGADADKGDGDKGSKGDKGDKGTGKESGLIGTKGDGDKGDEGIK 58530

Query 102 GEPGE 106  
G+ GE  
Sbjct 58531 GDKGE 58545

Score = 38.5 bits (88), Expect = 0.023, Method: Compositional matrix adjust.  
Identities = 28/62 (45%), Positives = 34/62 (55%), Gaps = 0/62 (0%)  
Frame = -1

Query 45 GHPGHNGAPGRDGRDGTTPGEKGEKGDPLIGPKGDIGETGVPGAEGPRGFPGIQGRKGEP 104  
 G G G G DG G G+KG+ G+ G G KGDIGE G G G +G G +G GE  
 Sbjct 646785 GDKGEKGDKGIDGDKGIKGDIGEKGEKGDIGEKGNKGDIGEKGEKGDIGEK 646606

Query 105 GE 106  
 G+  
 Sbjct 646605 GD 646600

Score = 38.5 bits (88), Expect = 0.023, Method: Compositional matrix adjust.  
 Identities = 29/64 (45%), Positives = 34/64 (53%), Gaps = 0/64 (0%)  
 Frame = +2

Query 42 GIPGHPGHNGAPGRDGRDGTTPGEKGEKGDPLIGPKGDIGETGVPGAEGPRGFPGIQGRK 101  
 GI G G G+ G G G G+KG KGD G G KGD G G G +G G G +G K  
 Sbjct 1301 GIKGEKGSKSGKGDGKGFKGDGKGIKGDGKSGKGDGDKGRKGDGDKGIDGKSGKGDK 1480

Query 102 GEPG 105  
 G+ G  
 Sbjct 1481 GDIG 1492

Score = 38.5 bits (88), Expect = 0.023, Method: Compositional matrix adjust.  
 Identities = 27/65 (42%), Positives = 33/65 (51%), Gaps = 0/65 (0%)  
 Frame = +1

Query 42 GIPGHPGHNGAPGRDGRDGTTPGEKGEKGDPLIGPKGDIGETGVPGAEGPRGFPGIQGRK 101  
 GI G G G G G +G G+KG KGD G G G G+ G G G +G G +G K  
 Sbjct 950485 GIKGDNGTKGDNGTKGDNGIKGDGKGIKGDNGTKGDNGTKGDNGTKGDNGIKGDGKTKGDK 950664

Query 102 GEPGE 106  
 G G+  
 Sbjct 950665 GSKGD 950679

Score = 38.5 bits (88), Expect = 0.024, Method: Compositional matrix adjust.  
 Identities = 27/61 (44%), Positives = 33/61 (54%), Gaps = 1/61 (2%)  
 Frame = -1

Query 39 WMAGIPGHPGHNGAPGRDGRDGTTPGEKGEKGDPLIGPKGDIGETGVPGAEGPRGFPGIQ 98  
 W+ I G G G G DG G KG+ GD G+ G KGD G+TG G G +G GI+  
 Sbjct 647097 WIP-ITNLKGEKGDGKGNKGIDGKGNKGDGTGDKGIDGSKGDKGDTGNKGDIGDKGDQGIK 646921

Query 99 G 99  
 G  
 Sbjct 646920 G 646918

Score = 38.5 bits (88), Expect = 0.026, Method: Compositional matrix adjust.  
 Identities = 28/68 (41%), Positives = 35/68 (51%), Gaps = 3/68 (4%)  
 Frame = +1

Query 42 GIPGHPGHNGAPGRDGRDGTTPGEKGE---KGDPLIGPKGDIGETGVPGAEGPRGFPGIQ 98  
 GI G G G G +G G G KG+ KGD G+ G G G+ G G G +G GI+  
 Sbjct 950458 GIKGDKGSEGIKGDNGTKGDNGTKGDNGIKGDGKGIKGDNGTKGDNGTKGDNGTKGDNGIK 950637

Query 99 GRKGEPE 106



Frame = -1

```
Query 60 GTPGEKGEKGDPLIGPKGDIGETGVPGAEGPRGFPGIQGRKG 102
      G G+KG GD GL G KGDIGE G+ G +G G G +G KG
Sbjct 645399 GDKGDKGNTGDIGLKGDKDIGEKGIKGDKINGSKGSKGDKG 645271
```

Score = 38.1 bits (87), Expect = 0.032, Method: Compositional matrix adjust.  
Identities = 27/66 (41%), Positives = 35/66 (53%), Gaps = 0/66 (0%)  
Frame = +1

```
Query 45 GHPGHNGAPGRDGRDGTTPGEKGEKGDPLIGPKGDIGETGVPGAEGPRGFPGIQGRKGEP 104
      G G +GA G G G KG+KG+ G IGPKG+ G G +G +G G +G KG
Sbjct 58288 GLKGESGADADKGDKDKGSKGDKGNKGDIGPKGESGADADKGDKDKGSKGDKGDKGTK 58467
```

```
Query 105 GEGAYV 110
      GE +
Sbjct 58468 GESGLI 58485
```

Score = 38.1 bits (87), Expect = 0.034, Method: Compositional matrix adjust.  
Identities = 28/64 (44%), Positives = 34/64 (53%), Gaps = 0/64 (0%)  
Frame = +1

```
Query 42 GIPGHPGHNGAPGRDGRDGTTPGEKGEKGDPLIGPKGDIGETGVPGAEGPRGFPGIQGRK 101
      G G G G G DG G G KG+KGD G IG KG+ G G +G +G G +G K
Sbjct 58189 GDKGSKGDKGDKGIDGNKGEKGSKGDKDKGDKDIGLKGESGADADKGDKDKGSKGDKGNK 58368
```

```
Query 102 GEPG 105
      G+ G
Sbjct 58369 GDIG 58380
```

Score = 38.1 bits (87), Expect = 0.035, Method: Compositional matrix adjust.  
Identities = 28/65 (43%), Positives = 35/65 (54%), Gaps = 3/65 (5%)  
Frame = +2

```
Query 42 GIPGHPGH---NGAPGRDGRDGTTPGEKGEKGDPLIGPKGDIGETGVPGAEGPRGFPGIQ 98
      GI G G G G G G G+KG KGD G G KGD G+ G G++G +G G +
Sbjct 833 GIKGESGSAVFKGDKGDKGDKGNKGDKNKGDKDKGDKIGAKGSKGDKGTKGDK 1012
```

```
Query 99 GRKGE 103
      G KG+
Sbjct 1013 GIKGD 1027
```

Score = 38.1 bits (87), Expect = 0.036, Method: Compositional matrix adjust.  
Identities = 28/64 (44%), Positives = 36/64 (56%), Gaps = 0/64 (0%)  
Frame = +1

```
Query 42 GIPGHPGHNGAPGRDGRDGTTPGEKGEKGDPLIGPKGDIGETGVPGAEGPRGFPGIQGRK 101
      G+ G G G G G G+ G+KG+KG G G KGD G G G +G +G GI+G K
Sbjct 4909 GMKGDKDKGNIGFKGDKGSKGDKGDKGDKGDKGDKGDKGDKGDKGDKGDKGDKGDKGDKGDK 5088
```

```
Query 102 GEPG 105
      G+ G
Sbjct 5089 GDKG 5100
```



Score = 38.1 bits (87), Expect = 0.036, Method: Compositional matrix adjust.  
Identities = 28/65 (43%), Positives = 37/65 (57%), Gaps = 0/65 (0%)  
Frame = -1

Query 42 GIPGHPGHNGAPGRDGRDGTTPGEKGEKGDPLIGPKGDIGETGVPGAEGPRGFPGIQGRK 101  
G G+ G G G G G G+KG KGD G IG KG+ G+ G G +G +G G +G K  
Sbjct 646812 GEKGNKGDIGDKGEKGDKGIDGDKGIKGDKGDIGEKGEKGDKGDIGEKGNKGDIGEKGEK 646633

Query 102 GEPGE 106  
G+ G+  
Sbjct 646632 GDKGD 646618

Score = 38.1 bits (87), Expect = 0.037, Method: Compositional matrix adjust.  
Identities = 26/62 (42%), Positives = 35/62 (56%), Gaps = 0/62 (0%)  
Frame = -3

Query 42 GIPGHPGHNGAPGRDGRDGTTPGEKGEKGDPLIGPKGDIGETGVPGAEGPRGFPGIQGRK 101  
G G G G G G G+ G+ G+KGD G +G KGD G+ G G +G +G G +G K  
Sbjct 801028 GDQGDKGDVGDKGDKGDGTGSKGDVGDKGDKGDVGDKGDGTGDKGDIGDKGDKGDVGDKGDK 800849

Query 102 GE 103  
G+  
Sbjct 800848 GD 800843

Score = 38.1 bits (87), Expect = 0.038, Method: Compositional matrix adjust.  
Identities = 28/65 (43%), Positives = 36/65 (55%), Gaps = 0/65 (0%)  
Frame = -1

Query 42 GIPGHPGHNGAPGRDGRDGTTPGEKGEKGDPLIGPKGDIGETGVPGAEGPRGFPGIQGRK 101  
G G G G G G G G+ GEKGD G +G KG+ G+ G G +G +G G +G K  
Sbjct 647496 GEKGEKGDKGDIGEKGEKGDKGDIGEKGDKGDLDGEKGEKGDGPKQKGEKGDKGDGDFGDKGDK 647317

Query 102 GEPGE 106  
G+ GE  
Sbjct 647316 GDIGE 647302

Score = 38.1 bits (87), Expect = 0.039, Method: Compositional matrix adjust.  
Identities = 29/64 (45%), Positives = 35/64 (55%), Gaps = 0/64 (0%)  
Frame = +1

Query 42 GIPGHPGHNGAPGRDGRDGTTPGEKGEKGDPLIGPKGDIGETGVPGAEGPRGFPGIQGRK 101  
G G+ G G G G G G KGEKG G G KGD G+ GV G +G +G G +G K  
Sbjct 4927 GDKGNIGFKGDKSGKGDKGDKGIKGEKGIKGDKGTGDKGDKGVKGDKGIKGDKGDKGNK 5106

Query 102 GEPG 105  
G+ G  
Sbjct 5107 GDKG 5118

Score = 38.1 bits (87), Expect = 0.039, Method: Compositional matrix adjust.  
Identities = 22/44 (50%), Positives = 29/44 (66%), Gaps = 0/44 (0%)  
Frame = +1

Query 60 GTPGEKGEKGDPLIGPKGDIGETGVPGAEGPRGFPGIQGRKGE 103

Sbjct 59470 G G+KG+KGD GL G KGD G+ G G +G +G G +G KG+  
GLKGDKGDKGDVGLKGDKGDKGDVGSKGDKGDKGSKGDKGSKGD 59601

Score = 37.7 bits (86), Expect = 0.041, Method: Compositional matrix adjust.  
Identities = 30/65 (46%), Positives = 35/65 (54%), Gaps = 0/65 (0%)  
Frame = -1

Query 42 GIPGHPGHNGAPGRDGRDGTTPGEKGEKGDPLIGPKGDIGETGVPGAEGPRGFPGIQGRK 101  
G G G G G G DG G KG+KGD G G KGD G+ G G +G G G +G K  
Sbjct 646803 GNKGDIGDKGEKGDKIDGDKGIKGDKDIGEKGEKGDIGEKGNKGDIGEKGEKGDK 646624

Query 102 GEPGE 106  
G+ GE  
Sbjct 646623 GDIGE 646609

Score = 37.7 bits (86), Expect = 0.041, Method: Compositional matrix adjust.  
Identities = 28/65 (43%), Positives = 37/65 (57%), Gaps = 0/65 (0%)  
Frame = +2

Query 42 GIPGHPGHNGAPGRDGRDGTTPGEKGEKGDPLIGPKGDIGETGVPGAEGPRGFPGIQGRK 101  
G+ G G G G G G G KG+KGD G G KG GE G+ G++G +G G +G K  
Sbjct 63854 GLKGENDIGDKGDKGSKGEDGLKGDKDIGDKGDKGSKGEDGLKGSKGDKGEIGNKGDK 64033

Query 102 GEPGE 106  
G+ G+  
Sbjct 64034 GDKGD 64048

Score = 37.7 bits (86), Expect = 0.042, Method: Compositional matrix adjust.  
Identities = 32/86 (37%), Positives = 38/86 (44%), Gaps = 21/86 (24%)  
Frame = -1

Query 42 GIPGHPGHNGAPGRDGRDGTTPGEKGEKGD-----PGLIGPKGDI 80  
G+ G G+NG PG G G G+KGE G+ G G KGDI  
Sbjct 647640 GLKGEKGNNGDPGEKGEKGAKGDKGESGEKGAKGDKGDKGDKGDIGEKGEKGDKDI 647461

Query 81 GETGVPGAEGPRGFPGIQGRKGEPE 106  
GE G G +G G G +G GE GE  
Sbjct 647460 GEKGEKGDKGDIGEKGDKDLGEKGE 647383

Score = 37.7 bits (86), Expect = 0.046, Method: Compositional matrix adjust.  
Identities = 37/112 (33%), Positives = 48/112 (43%), Gaps = 7/112 (6%)  
Frame = +1

Query 44 PGHPGHNGAPGRDGRDGTTPGEKGEKGDPG---LIGPKGDIGETGVPGAEGPRGFPGIQGR 100  
G G G G +G G GE G KG+ G G KGD GETG G G F G +G  
Sbjct 3157 KGDKGSKGDKGNNGDKGDKGETGIKGESGSAVFKGDKGDKGETGTKGESGSSVFKGDKGD 3336

Query 101 KGEPEG---EGAYVYRSFAFSVGLETYVTIPNMPPIRFTKIFYNQNHYDGSTG 148  
KGE G G+ V++ ET + + F ++ N +G G  
Sbjct 3337 KGETGTKGESGSAVFKGDKGDKGETGIKGESGSAVFKGDKGDKGNSEGEDKG 3492

Score = 37.7 bits (86), Expect = 0.052, Method: Compositional matrix adjust.  
Identities = 29/70 (41%), Positives = 35/70 (50%), Gaps = 5/70 (7%)



Score = 37.4 bits (85), Expect = 0.059, Method: Compositional matrix adjust.  
Identities = 29/66 (44%), Positives = 32/66 (48%), Gaps = 0/66 (0%)  
Frame = +1

Query 42 GIPGHPGHNGAPGRDGRDGTTPGEKGEKGDPLIGPKGDIGETGVPGAEGPRGFPGIQGRK 101  
G G G + G G G G KGE G G KGD GETG+ G G F G +G K  
Sbjct 3286 GTKGESGSSVFKGDKGDKGETGTGKESGSAVFKGDKGDKGETGIKGESGSAVFKGDKGDK 3465

Query 102 GEPGEG 107  
G GEG  
Sbjct 3466 GNSGEG 3483

Score = 37.4 bits (85), Expect = 0.062, Method: Compositional matrix adjust.  
Identities = 27/64 (42%), Positives = 35/64 (55%), Gaps = 3/64 (5%)  
Frame = +1

Query 42 GIPGHPGHNGAPGRDGRDGTTPGEKGEKGDPLIGPKGDIGETGVPGAEGPRGFPGIQGRK 101  
G G G G PG G G +KG+KGD G KGD G+ G+ G +G +G G +G K  
Sbjct 58108 GDKGSKGDKGDPGIKGESGADADKGDGDKGDK---GSKGDKGDKGIDGNKGEKGSKGDKGDK 58278

Query 102 GEPG 105  
G+ G  
Sbjct 58279 GDIG 58290

Score = 37.4 bits (85), Expect = 0.063, Method: Compositional matrix adjust.  
Identities = 25/56 (45%), Positives = 31/56 (55%), Gaps = 0/56 (0%)  
Frame = +3

Query 44 PGHPPGHNGAPGRDGRDGTTPGEKGEKGDPLIGPKGDIGETGVPGAEGPRGFPGIQG 99  
G G G G G G+ GEKGEKG G +G KG+ G G+ G +G G GI+G  
Sbjct 62127 KGIKGDKGIKGSKGDLSVGEKGEKGTGKDVGTGKGETGSKGIIGDKGELGSKGIK 62294

Score = 37.0 bits (84), Expect = 0.070, Method: Compositional matrix adjust.  
Identities = 28/64 (44%), Positives = 33/64 (52%), Gaps = 0/64 (0%)  
Frame = +1

Query 42 GIPGHPGHNGAPGRDGRDGTTPGEKGEKGDPLIGPKGDIGETGVPGAEGPRGFPGIQGRK 101  
G G G NG G +G G G KG+KG G G KGD G G G +G G G +G K  
Sbjct 950476 GSEGIKGDNGTKGDNGTKGDNGIKGDKGIKGDNGTKGDNGTKGDNGTKGDNGIKGDKGDK 950655

Query 102 GEPG 105  
G+ G  
Sbjct 950656 GDKG 950667

Score = 37.0 bits (84), Expect = 0.071, Method: Compositional matrix adjust.  
Identities = 23/44 (52%), Positives = 27/44 (61%), Gaps = 0/44 (0%)  
Frame = +1

Query 62 PGEKGEKGDPLIGPKGDIGETGVPGAEGPRGFPGIQGRKGEPG 105  
GEKG KGD G G KGD GE G G +G +G G +G KG+ G  
Sbjct 4780 KGEKGNKGDKNKGSKGDGKGEKGSKGDKNKGDNGDKGVKGDG 4911

Score = 37.0 bits (84), Expect = 0.081, Method: Compositional matrix adjust.  
Identities = 28/65 (43%), Positives = 33/65 (51%), Gaps = 0/65 (0%)  
Frame = +3

Query 41 AGIPGHPGHNGAPGRDGRDGTTPGEKGEKGDPLIGPKGDIGETGVPGAEGPRGFPGIQGR 100  
G G G G G G G PG KGE G G G KG G+ G G +G +G G +G  
Sbjct 61047 TGSKGGDDGIKGITGSKGFKGDPGKTKGENGINGTKGLKGSQDGLGTKGDDGIKGIIGSKGI 61226

Query 101 KGEPG 105  
KG+PG  
Sbjct 61227 KGDPG 61241

Score = 37.0 bits (84), Expect = 0.081, Method: Compositional matrix adjust.  
Identities = 22/46 (48%), Positives = 30/46 (65%), Gaps = 0/46 (0%)  
Frame = -1

Query 60 GTPGEKGEKGDPLIGPKGDIGETGVPGAEGPRGFPGIQGRKGEPG 105  
G G+KG+KG+ G IG KGD G+ G G +G +G G +G KG+ G  
Sbjct 645408 GLKGDKGDKGNTGDIKGLKGDIGEKGIKGDKINGSKGSKGDKG 645271

Score = 37.0 bits (84), Expect = 0.085, Method: Compositional matrix adjust.  
Identities = 26/58 (45%), Positives = 31/58 (53%), Gaps = 0/58 (0%)  
Frame = -1

Query 42 GIPGHPGHNGAPGRDGRDGTTPGEKGEKGDPLIGPKGDIGETGVPGAEGPRGFPGIQG 99  
G PG G G G G G G+ GEKGD G IG KG+ G+ G G +G +G G G  
Sbjct 647379 GDPGQKGEKGDKDFGDKGDKDIGEKGDKGDIGDKGESGDKGDVGEKGDKDKGTDG 647206

Score = 37.0 bits (84), Expect = 0.086, Method: Compositional matrix adjust.  
Identities = 25/61 (41%), Positives = 32/61 (52%), Gaps = 0/61 (0%)  
Frame = +1

Query 44 PGHPGHNGAPGRDGRDGTTPGEKGEKGDPLIGPKGDIGETGVPGAEGPRGFPGIQGRKGE 103  
G G G G G G G+ KG+KGD G G KGD G G+ G +G +G GI+G G+  
Sbjct 4249 KGDKGDKGETGKTKGESGSAVFKGDKGDKGNKGNKGDKGTQGIKGNKGDKGTQGIKGESGQ 4428

Query 104 P 104  
Sbjct 4429 A 4431

Score = 37.0 bits (84), Expect = 0.087, Method: Compositional matrix adjust.  
Identities = 31/90 (34%), Positives = 44/90 (49%), Gaps = 14/90 (16%)  
Frame = -3

Query 31 LPKGA CTG--WMAGIPGHPGHNGAPGRDGRDGTTPGEKGEKGDPG-----LIGP 76  
+P+G+ G ++G G G G+ G G G G KGE+GD G +G  
Sbjct 801589 VPQGS LKGD P G V S G S K G E K G D K G S S G E A G L K G E Q G T K G E Q G D Q G E Q G D K G D K G D K G D V G A 801410

Query 77 KGDIGETGVPGAEGPRGFPGIQGRKGEPGE 106  
KGD G+ G G G +G G +G KG+ G+  
Sbjct 801409 KGDQGDKGDQGDVGA KGDQGDKGDQGD 801320

Score = 37.0 bits (84), Expect = 0.092, Method: Compositional matrix adjust.

Identities = 25/53 (47%), Positives = 31/53 (58%), Gaps = 0/53 (0%)  
Frame = -3

Query 54 GRDGRDGTTPGEKGEKGDPLIGPKGDIGETGVPGAEGPRGFPGIQGRKGEPE 106  
G G G G+KG+KGD G G KGD+GE G G G +G G G KG+ G+  
Sbjct 800182 GDKGDKGDLGDKGDKGDVGDGDKGDKDVGEKGDGDKDVGEKGDGDKDIGDKGDKGD 800024

Score = 36.6 bits (83), Expect = 0.094, Method: Compositional matrix adjust.  
Identities = 27/62 (44%), Positives = 31/62 (50%), Gaps = 0/62 (0%)  
Frame = +1

Query 44 PGHPGHNGAPGRDGRDGTTPGEKGEKGDPLIGPKGDIGETGVPGAEGPRGFPGIQGRKGE 103  
G G G G G G G+KG KGD G G KGD G G G +G G G +G KG+  
Sbjct 950392 EGSKGSKGDVGNKGDKNKGDGKIKGDKGSEGIKGDNGTKGDNGTKGDNGIKGDKGIKGD 950571

Query 104 PG 105  
G  
Sbjct 950572 NG 950577

Score = 36.6 bits (83), Expect = 0.095, Method: Compositional matrix adjust.  
Identities = 28/65 (43%), Positives = 34/65 (52%), Gaps = 0/65 (0%)  
Frame = -1

Query 42 GIPGHPGHNGAPGRDGRDGTTPGEKGEKGDPLIGPKGDIGETGVPGAEGPRGFPGIQGRK 101  
G G G G G G G G++G KGD G G KGDIG+ G G +G RG G +G  
Sbjct 645840 GSKGEKGDIGQKGDGDKGDRGDRGIKGDIGSKGDKGDIGQKGDGKTKGDRGDKGEKGD 645661

Query 102 GEPGE 106  
G G+  
Sbjct 645660 GLKGD 645646

Score = 36.6 bits (83), Expect = 0.099, Method: Compositional matrix adjust.  
Identities = 35/93 (38%), Positives = 41/93 (44%), Gaps = 22/93 (24%)  
Frame = +1

Query 42 GIPGHPGHNGAPGRDGRDGTTPGE-----KGEKGDPG-----LIGPKGDIGET 83  
G G G+NG G G G GE KG+KGD G G KGD GET  
Sbjct 3169 GSKGDKGNNGDKGDKGETGIKGESGSAVFKGDKGDKGETGTKGESGSSVFKGDKGDKGET 3348

Query 84 GVPGAEGPRGFPGIQGRKGEPE----EGAYVYR 112  
G G G F G +G KGE G G+ V++  
Sbjct 3349 GTKGESGSAVFKGDKGDKGETGIKGESGSAVFK 3447

Score = 36.6 bits (83), Expect = 0.099, Method: Compositional matrix adjust.  
Identities = 24/53 (45%), Positives = 29/53 (55%), Gaps = 0/53 (0%)  
Frame = +1

Query 53 PGRDGRDGTTPGEKGEKGDPLIGPKGDIGETGVPGAEGPRGFPGIQGRKGEPE 105  
G G G G KG KGD G G KGD G G G +G +G G++G KG+ G  
Sbjct 4780 KGEKGNKGDKNKGSKGDGKGEKGSKGDKNKGDNGDKGVKGDGKMGDKGDKGD 4938

>NC\_031279.1 Mycobacterium phage Bactobuster, complete genome  
Length=52129

Score = 48.1 bits (113), Expect = 2e-05, Method: Compositional matrix adjust.  
Identities = 32/62 (52%), Positives = 36/62 (58%), Gaps = 0/62 (0%)  
Frame = +1

```
Query 45 GHPGHNGAPGRDGRDGTTPGEKGEKGDPLIGPKGDIGETGVPGAEGPRGFPGIQRKGE 104
          G PG G PG G G G KGD G GP+G IG+TG GA G G PG QG KG+
Sbjct 4408 GEPGPQGVPLQGPQGIQGPAGPKGDKDGTGPQGPIGDTGATGAPGTPGAPGAQGPKGDK 4587

Query 105 GE 106
          G+
Sbjct 4588 GD 4593
```

Score = 43.5 bits (101), Expect = 6e-04, Method: Compositional matrix adjust.  
Identities = 35/76 (46%), Positives = 43/76 (57%), Gaps = 9/76 (12%)  
Frame = +1

```
Query 45 GHPGHNGAPGRDGRDGTTPGEKGEKGDPLIGPKGDIGETGVPGAEGPRGFPGIQRKGE 104
          G G GAPG G G G KG+KGD G +GP+ G+ G +GPRGF G QG +G+
Sbjct 4516 GDTGATGAPGTPGAPGAQGPKGDKDQEMGPQ-----GLTGPQGPRGFEGPQGIIEGQR 4677

Query 105 GEGAYVYRSFAFSVGL 120
          G Y SA+ V LE
Sbjct 4678 GPLGY---SAYGVALE 4716
```

>NC\_018842.1 Propionibacterium phage P1.1, complete genome  
Length=29348

Score = 47.8 bits (112), Expect = 2e-05, Method: Compositional matrix adjust.  
Identities = 37/95 (39%), Positives = 51/95 (54%), Gaps = 10/95 (11%)  
Frame = +2

```
Query 42 GIPGHPGH---NGAPGRDGRDGTTPGEKGEKGDPLIGPKGDIGETGVPGAEGPRGFPGIQ 98
          G+PG G NG G DGRDG+ GE+G+ G G GP+G GE G G GP+G PG
Sbjct 15026 GVPGRAGADGVNVDGADGRDGSAGERGDVGPSGAPGQGAQGERGPAGVPVGPQGSPPAD 15205

Query 99 GRKGEPEGAYVYRSFAFSVGLETYVTIPNMPPIRFT 133
          G G+ G+ RS SV Y + + +++
Sbjct 15206 GTNGKDGKDG---RSVSV----YCSGGRLAVKYS 15289
```

>NC\_016071.1 Salmonella phage PVP-SE1, complete genome  
Length=145964

Score = 47.8 bits (112), Expect = 3e-05, Method: Compositional matrix adjust.  
Identities = 34/92 (37%), Positives = 49/92 (53%), Gaps = 8/92 (9%)  
Frame = -3

```
Query 45 GHPGHNGAPGRDGRDGTTPGEKGEKGDPLIGPKGDIGETGVPGAEGPRGFPGIQRKGE 104
          G G G G G +G G +G +G G IGPKGD G+TG+ G GP+G G +G +GE
Sbjct 52494 GQKGDQGPPEGPAGAEGPAGAEGPQGIQGPPIGPKGDKDGTGLTGPVGPQGPQGPKGDRGET 52315

Query 105 GEGAYVYRSFAFSVGL-----ETYVTIPNM 128
          G GA V + +V + ++ +PN+
Sbjct 52314 GYGARVLGTKGAVSDLPATGTPGDWIIIVPNL 52219
```

>NC\_027351.1 Salmonella phage SSE-121, complete genome  
Length=147745

Score = 47.8 bits (112), Expect = 3e-05, Method: Compositional matrix adjust.  
Identities = 34/92 (37%), Positives = 49/92 (53%), Gaps = 8/92 (9%)  
Frame = +3

```
Query 45      GHPGHNGAPGRDGRDGTTPGEKGEKGDPLIGPKGDIGETGVPGAEGPRGFPGIQGRKGEP 104
              G G G G G +G G +G +G G IGPKGD G+TG+ G GP+G G +G +GE
Sbjct 14841   GQKGDQGPPEGPAGAEGPAGAEGPQGIQGPPIGPKGDKGDTGLTGPVGPQGPQGPKGDRGET 15020

Query 105     GEGAYVYRSAFSVGL-----ETYVTIPNM 128
              G GA V + +V          + ++ +PN+
Sbjct 15021   GYGARVLGTKGAVSDLPATGTPGDAWIIVPNL 15116
```

>NC\_027628.1 Propionibacterium phage Lauchelly, complete genome  
Length=29517

Score = 47.4 bits (111), Expect = 3e-05, Method: Compositional matrix adjust.  
Identities = 31/82 (38%), Positives = 41/82 (50%), Gaps = 3/82 (4%)  
Frame = +3

```
Query 42      GIPGHPGHNGAPGRDGRDGTTPGEKGEKGDPLIGPKGDIGETGVPGAEGPRGFPGIQGRK 101
              G+PG G +G G DG+DG G GE+GD +GP G +G G G G RG G+ G
Sbjct 15036   GVPGRAGADGVNGSDGKDGANGADGERGD---VGPSGPVGPQGAQGERGERGPDGVNGSD 15206

Query 102     GEPGEGAYVYRSAFSVGLETYV 123
              G+ G S + G +V
Sbjct 15207   GKDGANGRSVVSVYCSGGRFLV 15272
```

>NC\_018840.1 Propionibacterium phage P100\_1, complete genome  
Length=29612

Score = 47.0 bits (110), Expect = 4e-05, Method: Compositional matrix adjust.  
Identities = 36/94 (38%), Positives = 49/94 (52%), Gaps = 7/94 (7%)  
Frame = +3

```
Query 40      MAGIPGHPGHNGAPGRDGRDGTTPGEKGEKGDPLIGPKGDIGETGVPGAEGPRGFPGIQG 99
              ++G G G NGA G+DGRDG+ GE+GE G G GP+G GE G GP G G G
Sbjct 15042   VSGRAGVDGVNGADGKDGDRDGSAGERGEVGPSPAGPQGAQGER---GERGPAGVNGSDG 15212

Query 100     RKGEPGEGAYVYRSAFSVGLETYVTIPNMPPIRFT 133
              + G G RS SV Y + + ++++
Sbjct 15213   KDGTGDADGRDGRSVISV----YCSGGRLLVVKYS 15302
```

>NC\_022087.1 Mycobacterium phage AnnaL29, complete genome  
Length=53253

Score = 47.0 bits (110), Expect = 5e-05, Method: Compositional matrix adjust.  
Identities = 32/62 (52%), Positives = 35/62 (56%), Gaps = 0/62 (0%)  
Frame = +2

```
Query 45      GHPGHNGAPGRDGRDGTTPGEKGEKGDPLIGPKGDIGETGVPGAEGPRGFPGIQGRKGEP 104
              G PG G G G G G KG+KGD G GPKGD G G PGA G G G +G KG+
```



Sbjct 4586 GEPGPQGLQGPKGDTGPAGPKGDKGDTGEQGPKGDTGAAGTPGAPGATGAQQPKGDKGDQ 4765  
 Query 105 GE 106  
 GE  
 Sbjct 4766 GE 4771

Score = 41.6 bits (96), Expect = 0.003, Method: Compositional matrix adjust.  
 Identities = 33/73 (45%), Positives = 39/73 (53%), Gaps = 9/73 (12%)  
 Frame = +2

Query 48 GHNGAPGRDGRDGTPEKGEKGDPLIGPKGDIGETGVPGAEGPRGFPGIQGRKGEPEG 107  
 G G PG G G G KG+KGD G +GP+ G+ GA GPRG G +G GE G  
 Sbjct 4694 GAAGTPGAPGATGAQQPKGDKGDQEMGPQ-----GLTGATGPRGLEGPKGDTGERGPL 4855

Query 108 AYVYRSAFSVGLE 120  
 Y SA+ V LE  
 Sbjct 4856 GY---SAYQVALE 4885

>NC\_021795.1 Cellulophaga phage phi17:1, complete genome  
 Length=38776

Score = 46.6 bits (109), Expect = 6e-05, Method: Compositional matrix adjust.  
 Identities = 39/99 (39%), Positives = 49/99 (49%), Gaps = 10/99 (10%)  
 Frame = +3

Query 18 QETTTQGP-----GVLLPLPKGACTGWMAGIPGHPGHNGAPGRDGRDGTPEKGEKGD 70  
 ++ TTQG G+L+ L G G G G G G G G G KG+ GD  
 Sbjct 26205 RDETTQGAN TAERVGGILVDLSTALEEGGAVGPAGPQGEQGIQGEQGIQGEQGVKGD TGD 26384

Query 71 PG---LIGPKGDIGETGVPGAEGPRGFPGIQGRKGEPEG 106  
 G + G +G+ GETG G +G G GIQG +GEPGE  
 Sbjct 26385 TGPQGIQGIQGEPEGETGPQGIQGETGPQGIQGIQGEPEG 26501

Score = 43.9 bits (102), Expect = 4e-04, Method: Compositional matrix adjust.  
 Identities = 31/73 (42%), Positives = 38/73 (52%), Gaps = 6/73 (8%)  
 Frame = +3

Query 40 MAGIPGHPGHNGAPGRDGR-----DGTPGEKGEKGDPLIGPKGDIGETGVPGAEGPRG 93  
 + GI G PG G G G G GE GE G G+ G KGD G+TG G +G +G  
 Sbjct 26400 IQGIQGEPEGETGPQGIQGETGPQGIQGIQGEPEGEDGAQGIQGIKGD TGD TGPQGLQGIQG 26579

Query 94 FPGIQGRKGEPEG 106  
 G+QG +G GE  
 Sbjct 26580 AAGLQGEQGIQGE 26618

Score = 41.6 bits (96), Expect = 0.003, Method: Compositional matrix adjust.  
 Identities = 27/64 (42%), Positives = 34/64 (53%), Gaps = 0/64 (0%)  
 Frame = +3

Query 42 GIPGHPGHNGAPGRDGRDGTPEKGEKGDPLIGPKGDIGETGVPGAEGPRGFPGIQGRK 101  
 G+ G G G G G G PGE G +G G GP+G G G PG +G +G GI+G  
 Sbjct 26361 GVKGDTGDTGPQGIQGIQGEPEGETGPQGIQGETGPQGIQGIQGEPEGEDGAQGIQGIKGD T 26540

Query 102 GEPG 105

Sbjct 26541 G+ G  
GDTG 26552

>NC\_028965.1 Mycobacterium phage Pioneer, complete genome  
Length=53219

Score = 45.8 bits (107), Expect = 1e-04, Method: Compositional matrix adjust.  
Identities = 31/59 (53%), Positives = 37/59 (63%), Gaps = 3/59 (5%)  
Frame = +1

Query 45 GHPGHNGAPGRDGRDGTTPGEKGEKGDPLIGPKGDIGETGVPGAEGPRGFPGIQGRKGE 103  
G PG GA G G G PGE G +GDPG GP+G G+T GA+GP+G G QG KG+  
Sbjct 4873 GDPGTAGATGLTGSAGAPGEPGPQGDPTGPQGPKGDT---GAQGPKGDTGAQGPKGD 5040

Score = 41.6 bits (96), Expect = 0.002, Method: Compositional matrix adjust.  
Identities = 33/64 (52%), Positives = 35/64 (55%), Gaps = 0/64 (0%)  
Frame = +1

Query 42 GIPGHPGHNGAPGRDGRDGTTPGEKGEKGDPLIGPKGDIGETGVPGAEGPRGFPGIQGRK 101  
GI G G G G G G GEKG+KGD G GPKGD G+ G PG G G G G  
Sbjct 4747 GIQGATGPQGLQGPKGDDQIQGEKGDKGLDLPQGPKGDKGDKDPGTAGATGLTGSAGAP 4926

Query 102 GEPG 105  
GEPG  
Sbjct 4927 GEPG 4938

Score = 40.8 bits (94), Expect = 0.004, Method: Compositional matrix adjust.  
Identities = 35/96 (36%), Positives = 45/96 (47%), Gaps = 12/96 (13%)  
Frame = +1

Query 41 AGIPGHPGHNGAPGRDGRDGTTPGE-----KGEKGDPLIGPKGDIGETGVPGA 88  
AG PG PG G PG G G G+ +G KGD G GPKGD G TG G+  
Sbjct 4915 AGAPGEPGPQGDPTGPQGPKGDTGAQGPKGDTGAQGPKGDTGAQGPKGDTGATGATGS 5094

Query 89 EGPRGFPGIQGRKGEPEGAYVYRSFAFSVGLETYVT 124  
+GP+G G + V ++A+ G +T T  
Sbjct 5095 QGPQGPSGTPSSTNTVLDLVKVTQAAVDAGPKTATT 5202

Score = 39.3 bits (90), Expect = 0.014, Method: Compositional matrix adjust.  
Identities = 30/62 (48%), Positives = 35/62 (56%), Gaps = 0/62 (0%)  
Frame = +1

Query 45 GHPGHNGAPGRDGRDGTTPGEKGEKGDPLIGPKGDIGETGVPGAEGPRGFPGIQGRKGE 104  
G PG G G G G G G KGD G GP+G G TG G +GP+G GIQG KG+  
Sbjct 4648 GDPGDTGPTGATGPAGPQATGPKGDTGAQGPQGIQGATGPQGLQGPKGDDQIQGEKGD 4827

Query 105 GE 106  
G+  
Sbjct 4828 GD 4833

Score = 37.4 bits (85), Expect = 0.059, Method: Compositional matrix adjust.  
Identities = 27/59 (46%), Positives = 32/59 (54%), Gaps = 0/59 (0%)  
Frame = +1

Query 48 GHNGAPGRDGRDGTTPGEKGEKGDPLIGPKGDIGETGVPGAEGPRGFPGIQGRKGEPE 106  
G G G G G G+KG+KGDPG G G G G PG GP+G PG G +G G+  
Sbjct 4810 GEKGDKGDLDGPQGPKGDKGDKDGPDTAGATGLTGSAGAPGEPGPGQDGPPTGPQGPKGD 4986

>NC\_020104.1 Acanthamoeba polyphaga moumouvirus, complete genome  
Length=1021348

Score = 45.8 bits (107), Expect = 1e-04, Method: Compositional matrix adjust.  
Identities = 31/68 (46%), Positives = 39/68 (57%), Gaps = 0/68 (0%)  
Frame = +2

Query 42 GIPGHPGHNGAPGRDGRDGTTPGEKGEKGDPLIGPKGDIGETGVPGAEGPRGFPGIQGRK 101  
G G G G G G G+KG++GD G G KGD G+ G+ G +G +G GIQG K  
Sbjct 211289 GQKGAKEQGIKGESGEVAFKGDGDKDQGDQGTGDKGDKGDKDQGINGEKGEKGDRIQGIK 211468

Query 102 GEPGEGAY 109  
GE GE A+  
Sbjct 211469 GESGEVAF 211492

Score = 45.1 bits (105), Expect = 2e-04, Method: Compositional matrix adjust.  
Identities = 30/75 (40%), Positives = 41/75 (55%), Gaps = 9/75 (12%)  
Frame = +2

Query 40 MAGIPGHPGHNGAPGRDGRDGTTPGEKGEKGDPLIGPKGDIGETGVPGAEGPR----- 92  
+ G G G NG G G G G+KG+KGD G+ G KGD G+ G+ G +G +  
Sbjct 218327 VNGQKGDKGQNGVKGLKGNKGEKGDGDKGDLGVNGQKGDKGQNGIKGLKGNKGEKGDKG 218506

Query 93 --GFPGIQGRKGEPE 105  
GF G++G KG+ G  
Sbjct 218507 ELGFRGLKGDGDKG 218551

Score = 44.3 bits (103), Expect = 3e-04, Method: Compositional matrix adjust.  
Identities = 29/67 (43%), Positives = 37/67 (55%), Gaps = 0/67 (0%)  
Frame = +2

Query 40 MAGIPGHPGHNGAPGRDGRDGTTPGEKGEKGDPLIGPKGDIGETGVPGAEGPRGFPGIQG 99  
G G G NG G G++G G KG KG+ G G KGD+G G G +G G G++G  
Sbjct 218300 QKGDGDLGVNGQKGDKGQNGVKGLKGNKGEKGDGDKGDLGVNGQKGDKGQNGIKGLKG 218479

Query 100 RKGEPGE 106  
KGE G+  
Sbjct 218480 NKGEKGD 218500

Score = 44.3 bits (103), Expect = 4e-04, Method: Compositional matrix adjust.  
Identities = 31/68 (46%), Positives = 38/68 (56%), Gaps = 3/68 (4%)  
Frame = +2

Query 42 GIPGHPGHNGAPGRDGRDGTTPGEKGEKGD---PGLIGPKGDIGETGVPGAEGPRGFPGIQ 98  
GI G G G G G G G+KG KGD G+ G KGD+G+ G+ G G +G G +  
Sbjct 219278 GIKGDLGDKGIKGDGDKGDLGDKGIKGDLDGDKGIKGDLDGDKGIKGDLDGDKGIKGD 219457

Query 99 GRKGEPE 106  
G KGE GE

Sbjct 219458 GDKGEKGE 219481

Score = 42.4 bits (98), Expect = 0.001, Method: Compositional matrix adjust.  
Identities = 37/131 (28%), Positives = 57/131 (44%), Gaps = 21/131 (16%)  
Frame = +2

Query 42 GIPGHPGHNGAPGRDGRDGTTPGEKGEKGDPLIGPKGDIGETGVPGAEGPRGFPGIQGRK 101  
G G G G G G G G G+KG+ GD GL G KGD+G+ G+ G +G G G++G K  
Sbjct 212651 GEKGDKGEKGNLGEIGLKGDKGDGLGDEGLKGDKGLGDEGLKGDKGLGDEGLKGDK 212830

Query 102 GEPGE-----GAYVYRSAFSVGLETYVTIPNMPPIRFTKIFYNQNHYDGGSTGKFHCNI 154  
G G+ G+ ++ T V P+ + Y N+ G +  
Sbjct 212831 GNKGDLDGDKDNGSRIF-----TGVGTPSSFLGVNGDIYIDNNN-----GNLYIKT 212968

Query 155 PGLYYFAYHIT 165  
G++ ++T  
Sbjct 212969 SGIWVLQTNLT 213001

Score = 42.4 bits (98), Expect = 0.002, Method: Compositional matrix adjust.  
Identities = 30/65 (46%), Positives = 36/65 (55%), Gaps = 0/65 (0%)  
Frame = +2

Query 42 GIPGHPGHNGAPGRDGRDGTTPGEKGEKGDPLIGPKGDIGETGVPGAEGPRGFPGIQGRK 101  
G G G G G G G G GEKG+KGD G G KGD G+ G G +G +G G +G K  
Sbjct 214586 GDKGEKGLGKGDGKGEKGLGKGDGKGDGKGEKGDGKGLGKGEKGDGKGEKGDGKGEK 214765

Query 102 GEPGE 106  
G+ GE  
Sbjct 214766 GDLGE 214780

Score = 42.4 bits (98), Expect = 0.002, Method: Compositional matrix adjust.  
Identities = 29/65 (45%), Positives = 37/65 (57%), Gaps = 0/65 (0%)  
Frame = +2

Query 42 GIPGHPGHNGAPGRDGRDGTTPGEKGEKGDPLIGPKGDIGETGVPGAEGPRGFPGIQGRK 101  
G G G G G G G G GEKG+KG+ G +G KGD G+ G G +G +G G +G K  
Sbjct 214550 GEKGEKGLGDKGDKGEKGLGKGDGKGEKGLGKGDGKGDGKGEKGDGKGLGKGEKGEK 214729

Query 102 GEPGE 106  
G+ GE  
Sbjct 214730 GDKGE 214744

Score = 42.0 bits (97), Expect = 0.002, Method: Compositional matrix adjust.  
Identities = 29/66 (44%), Positives = 39/66 (59%), Gaps = 5/66 (8%)  
Frame = +2

Query 45 GHPGHNGAPGRDGRDGT-----PGEKGEKGDPLIGPKGDIGETGVPGAEGPRGFPGIQG 99  
G+PG+ G G G G G+KG+KGD G+ G KGD G+ GV G +G +G G +G  
Sbjct 218228 GYPGYRGIKGEKGNNSGNINNDIKQKGDGKGLGVNGQKGDGKQNGVKGLKGNKGEKGDGK 218407

Query 100 RKGEPPG 105  
KG+ G  
Sbjct 218408 DKGDLG 218425

Score = 42.0 bits (97), Expect = 0.002, Method: Compositional matrix adjust.  
Identities = 28/65 (43%), Positives = 38/65 (58%), Gaps = 0/65 (0%)  
Frame = +2

Query 42 GIPGHPGHNGAPGRDGRDGTTPGEKGEKGDPLIGPKGDIGETGVPGAEGPRGFPGIQGRK 101  
G G+ G G G G G G KG KGD G +G KGD+G+ G+ G +G +G G +G K  
Sbjct 218567 GSKGNKGDKNLGDKGLDGDGKGIKGNKGDKGLDGDGKGIKGNKGDKGLDGDGKGIKGNKGDKGLDGDGK 218746

Query 102 GEPGE 106  
G+ G+  
Sbjct 218747 GDLGD 218761

Score = 42.0 bits (97), Expect = 0.002, Method: Compositional matrix adjust.  
Identities = 28/65 (43%), Positives = 37/65 (57%), Gaps = 0/65 (0%)  
Frame = +2

Query 42 GIPGHPGHNGAPGRDGRDGTTPGEKGEKGDPLIGPKGDIGETGVPGAEGPRGFPGIQGRK 101  
G G G G G G G G +KGEKGD G +G KG+ G+ G G +G +G G +G K  
Sbjct 214613 GEKGDKGEKGDLDGEKGDKGLDGDGKGEKGDKGLDGEKGEKGDKGEKGDKGEKGDLDGEKGEK 214792

Query 102 GEPGE 106  
G+ G+  
Sbjct 214793 GDKGD 214807

Score = 42.0 bits (97), Expect = 0.002, Method: Compositional matrix adjust.  
Identities = 30/65 (46%), Positives = 36/65 (55%), Gaps = 0/65 (0%)  
Frame = +2

Query 42 GIPGHPGHNGAPGRDGRDGTTPGEKGEKGDPLIGPKGDIGETGVPGAEGPRGFPGIQGRK 101  
G G G G G G G G +KGEKGD G G KGD+G+ G G +G G G +G K  
Sbjct 214559 GEKGDLDGDKGDKGEKGDLDGEKGDKGEKGDLDGEKGDKGLDGDGKGEKGDKGLDGEKGEKGDK 214738

Query 102 GEPGE 106  
GE G+  
Sbjct 214739 GEKGD 214753

Score = 41.2 bits (95), Expect = 0.004, Method: Compositional matrix adjust.  
Identities = 31/71 (44%), Positives = 40/71 (56%), Gaps = 6/71 (8%)  
Frame = +2

Query 42 GIPGHPGH---NGAPGRDGRDGTTPGEKGEKGDPLIGPKGDIGETGVPGAEGPRG---FP 95  
GI G G G G G GT G+KG+KGD G+ G KG+ G+ G+ G +G G F  
Sbjct 211316 GIKGESGEVAFKGDKGDQGDQGTGDKGDKGDQGINGEKGEKGDRIQGIKGESGEVAFK 211495

Query 96 GIQGRKGEPEGE 106  
G +G KG+ GE  
Sbjct 211496 GEKGDKGLDGE 211528

Score = 41.2 bits (95), Expect = 0.004, Method: Compositional matrix adjust.  
Identities = 28/65 (43%), Positives = 37/65 (57%), Gaps = 0/65 (0%)  
Frame = +2

Query 42 GIPGHPGHNGAPGRDGRDGTTPGEKGEKGDPLIGPKGDIGETGVPGAEGPRGFPGIQGRK 101

Sbjct 214514 G G G G G G G G +KG+KG+ G +G KGD GE G G +G +G G +G K  
 GEKGDKGDKGDLGEKGEKGDLDGDKGDKGEKGDLDGEKGDKEKGDLDGEKGDKGDLGDKGEK 214693

Query 102 GEPGE 106  
 G+ G+

Sbjct 214694 GDKGD 214708

Score = 41.2 bits (95), Expect = 0.004, Method: Compositional matrix adjust.  
 Identities = 30/65 (46%), Positives = 36/65 (55%), Gaps = 0/65 (0%)  
 Frame = +2

Query 42 GIPGHPGHNGAPGRDGRDGTTPGEKGEKGDPLIGPKGDIGETGVPGAEGPRGFPGIQGRK 101  
 G G G G G G G G GEKGEKGD G G KG+ G+ G G +G +G G +G K

Sbjct 214649 GEKGDKGDLGDKGEKGDLDGDKGDKGEKGDKEKGDKEKGDLDGEKGEKGDKGDLGDKGEK 214828

Query 102 GEPGE 106  
 G+ GE

Sbjct 214829 GDLGE 214843

Score = 41.2 bits (95), Expect = 0.004, Method: Compositional matrix adjust.  
 Identities = 28/63 (44%), Positives = 36/63 (57%), Gaps = 0/63 (0%)  
 Frame = +2

Query 43 IPGHPGHNGAPGRDGRDGTTPGEKGEKGDPLIGPKGDIGETGVPGAEGPRGFPGIQGRK 102  
 I G G G G G G G +KG+KGD G G KGD+G+ G+ G +G G GI+G G

Sbjct 219254 IKGDLGDKGIKGDLDGDKGIKGDKGDKGDLGDKGIKGDLDGDKGIKGDLDGDKGIKGDLDG 219433

Query 103 EPG 105  
 + G

Sbjct 219434 DKG 219442

Score = 40.8 bits (94), Expect = 0.004, Method: Compositional matrix adjust.  
 Identities = 27/65 (42%), Positives = 36/65 (55%), Gaps = 0/65 (0%)  
 Frame = +2

Query 42 GIPGHPGHNGAPGRDGRDGTTPGEKGEKGDPLIGPKGDIGETGVPGAEGPRGFPGIQGRK 101  
 G+ G G G G G G G GEKG+KG+ G G KGD G+ G+ G G +G G +G

Sbjct 218423 GVNQKQKDGKQNGIKGLKGNKGEKGDKEGELGFRGLKGDKEKGIKGDLDGSKGNKGDKNL 218602

Query 102 GEPGE 106  
 G+ G+

Sbjct 218603 GDKGD 218617

Score = 40.4 bits (93), Expect = 0.006, Method: Compositional matrix adjust.  
 Identities = 28/65 (43%), Positives = 36/65 (55%), Gaps = 0/65 (0%)  
 Frame = +2

Query 42 GIPGHPGHNGAPGRDGRDGTTPGEKGEKGDPLIGPKGDIGETGVPGAEGPRGFPGIQGRK 101  
 G G G G G G G G +G GEKGD G +G KG+ G+ G G +G +G G +G K

Sbjct 214577 GDKGDKEKGDLDGEKGDKEKGDLDGDKGDKGEKGDLDGDKGEKGDKEKGDLDGDKGEKGDKEKGD 214756

Query 102 GEPGE 106  
 GE G+

Sbjct 214757 GEKGD 214771



Query 102 GEPGEGAYVYRSAFSVGLETYVTIPNMPPIRFT 133  
GE G A Y S + G+ P +PI T  
Sbjct 219485 GESGISAN-YISTYYNGVPGSFVAP-VPIGAT 219574

Score = 40.0 bits (92), Expect = 0.008, Method: Compositional matrix adjust.  
Identities = 29/65 (45%), Positives = 36/65 (55%), Gaps = 0/65 (0%)  
Frame = +2

Query 42 GIPGHPGHNGAPGRDGRDGTTPGEKGEKGDPLIGPKGDIGETGVPGAEGPRGFPIQGRK 101  
GI G+ G G G G G G KG KGD G +G KGD G+ G G +G G GI+G  
Sbjct 218630 GIKGNKGDKGDLDGDKGDLGDKGIKGNKGDKGDLDGDKGDKGDLGDKGTGKGNLGDKGDKGDL 218809

Query 102 GEPGE 106  
G+ G+  
Sbjct 218810 GDKGD 218824

Score = 40.0 bits (92), Expect = 0.008, Method: Compositional matrix adjust.  
Identities = 27/67 (40%), Positives = 39/67 (58%), Gaps = 0/67 (0%)  
Frame = +2

Query 40 MAGIPGHPGHNGAPGRDGRDGTTPGEKGEKGDPLIGPKGDIGETGVPGAEGPRGFPIQG 99  
+ G+ G+ G G G G G G+KG+KG G +G KG+ G+ G G +G G GI+G  
Sbjct 218462 IKGLKGNKGEKGDKGELGFRGLKGDKGDGKIGKDLGSKGNKGDKNLGDGDLGDKGIK 218641

Query 100 RKGEPGE 106  
KG+ G+  
Sbjct 218642 NKGDKGD 218662

Score = 39.7 bits (91), Expect = 0.011, Method: Compositional matrix adjust.  
Identities = 22/45 (49%), Positives = 28/45 (62%), Gaps = 0/45 (0%)  
Frame = +3

Query 65 KGEKGDPLIGPKGDIGETGVPGAEGPRGFPIQGRKGEPEGAY 109  
KG KGDPG+ G KGD G G +G +G G +G KG+PG A+  
Sbjct 261474 KGSKGDPIKSGSKGDPGTAAFKGEKGDKGEKGDKSGKDPGTAA 261608

Score = 39.7 bits (91), Expect = 0.012, Method: Compositional matrix adjust.  
Identities = 28/67 (42%), Positives = 37/67 (55%), Gaps = 0/67 (0%)  
Frame = +2

Query 40 MAGIPGHPGHNGAPGRDGRDGTTPGEKGEKGDPLIGPKGDIGETGVPGAEGPRGFPIQG 99  
+ G+ G+ G G G G G G+KG+KG G+ G KG+ GE G G G RG G +G  
Sbjct 218363 VKGLKGNKGEKGDKGDLDGKQKQNGIKGLKGNKGEKGDKGELGFRGLKGDKG 218542

Query 100 RKGEPGE 106  
KG G+  
Sbjct 218543 DKGDKGD 218563

Score = 39.7 bits (91), Expect = 0.012, Method: Compositional matrix adjust.  
Identities = 27/63 (43%), Positives = 35/63 (56%), Gaps = 0/63 (0%)  
Frame = +2

Query 44 PGHPGHNGAPGRDGRDGTTPGEKGEKGDPLIGPKGDIGETGVPGAEGPRGFPIQGRKGE 103



G G G G G G E+G+KGD G +G KGD G+ G G +G +G G +G KGE  
 Sbjct 214421 KGEKGDIGIKGEKGEAGVDAEQGDKGDKGDLGEKGDGDKGDLGEKGEKGDLDGDKGDKGE 214600  
 Query 104 PGE 106  
 G+  
 Sbjct 214601 KGD 214609

Score = 39.3 bits (90), Expect = 0.014, Method: Compositional matrix adjust.  
 Identities = 27/65 (42%), Positives = 38/65 (58%), Gaps = 0/65 (0%)  
 Frame = +2

Query 42 GIPGHPGHNGAPGRDGRDGTTPGEKGEKGDPLIGPKGDIGETGVPGAEGPRGFPGIQGRK 101  
 G G G+ G G G G G+KG+ GD G+ G KGD+G+ G G +G +G G +G K  
 Sbjct 157448 GDKGDKGNLGDGDKGNLGDGDKGDLGDKGIKGDGDLGDKGDLGDKGIKGDLDGDKGIK 157627  
 Query 102 GEPGE 106  
 G+ G+  
 Sbjct 157628 GDLGD 157642

Score = 39.3 bits (90), Expect = 0.015, Method: Compositional matrix adjust.  
 Identities = 29/69 (42%), Positives = 38/69 (55%), Gaps = 2/69 (3%)  
 Frame = +2

Query 44 PGHPGHNGAPGRDGRDGTTPGEKGEKGDPLIGPKGDIGETGVPGAEGPRGFPGIQGRKGE 103  
 G G G G G G+ KG+KGDGP G KG++GE G G +G G G +G KGE  
 Sbjct 213503 KGDKGDKGNEGLKGESGSAVFKGDKGDPGDKGDKGNLGEKGDGDKGDLGVKGNKGDGKE 213682  
 Query 104 PGEAYVYR 112  
 G+ V++  
 Sbjct 213683 S--GSAVFK 213703

Score = 39.3 bits (90), Expect = 0.017, Method: Compositional matrix adjust.  
 Identities = 28/67 (42%), Positives = 36/67 (54%), Gaps = 0/67 (0%)  
 Frame = +2

Query 40 MAGIPGHPGHNGAPGRDGRDGTTPGEKGEKGDPLIGPKGDIGETGVPGAEGPRGFPGIQG 99  
 + G G G G G G G G G+KG KGD G G KGD+G+ G+ G G +G G G  
 Sbjct 156560 IIGKNGPKGDKGDLGDKGIKGGDLGDKGIKGDLDGDKGIKGDLDGDKGIKGDLDGDKGIKGDLDG 156739  
 Query 100 RKGEPE 106  
 KG+ G+  
 Sbjct 156740 DKGDKGD 156760

Score = 38.9 bits (89), Expect = 0.019, Method: Compositional matrix adjust.  
 Identities = 30/65 (46%), Positives = 35/65 (54%), Gaps = 0/65 (0%)  
 Frame = +2

Query 42 GIPGHPGHNGAPGRDGRDGTTPGEKGEKGDPLIGPKGDIGETGVPGAEGPRGFPGIQGRK 101  
 G G G G G G G G GEKG+KGD G G KGD GE G G +G G G +G K  
 Sbjct 214622 GDKGEKGDLDGEKGDGDLGDKGEKGDGDLGDKGEKGDGDKGDKGDLGDKGEKGDLDGDKGEKGD 214801  
 Query 102 GEPGE 106  
 G+ G+  
 Sbjct 214802 GDLGD 214816

Score = 38.5 bits (88), Expect = 0.027, Method: Compositional matrix adjust.  
Identities = 28/66 (42%), Positives = 34/66 (52%), Gaps = 0/66 (0%)  
Frame = +2

Query 40 MAGIPGHPGHNGAPGRDGRDGTTPGEKGEKGDPLIGPKGDIGETGVPGAEGPRGFPGIQG 99  
+ G G G G G G G G KG+KGD G G KGD+G+ G G G +G G G  
Sbjct 218633 IKGNKGDKGDLDGDKGDLGDKGIKGNKGDKGDLDGDKGDKGDLGDKGTGKGNLGDKGIKGDLDG 218812

Query 100 RKGEPE 105  
KG+ G  
Sbjct 218813 DKGDKG 218830

Score = 38.5 bits (88), Expect = 0.030, Method: Compositional matrix adjust.  
Identities = 31/72 (43%), Positives = 41/72 (57%), Gaps = 4/72 (6%)  
Frame = +2

Query 42 GIPGHPGHNGAPGRDGRDGTTPGEKGEKGDPLIGPKGDIGETGVPGAEGPRGFPGIQGRK 101  
G G PG G G G G G+KG+KGD G+ G KGD GE+G +G +G +G K  
Sbjct 213569 GDKGDPGDKGDKGNLGE---KGDKGDKGDLDGKGNKGDKGESGSAVFKGDKGDLAEKGDK 213739

Query 102 GEPGE-GAYVYR 112  
GE GE G+ V++  
Sbjct 213740 GEKGESGSAVFK 213775

Score = 38.1 bits (87), Expect = 0.030, Method: Compositional matrix adjust.  
Identities = 29/65 (45%), Positives = 35/65 (54%), Gaps = 0/65 (0%)  
Frame = +2

Query 42 GIPGHPGHNGAPGRDGRDGTTPGEKGEKGDPLIGPKGDIGETGVPGAEGPRGFPGIQGRK 101  
G G G G G G G G GEKG+KG+ G G KGD+GE G G +G G G +G  
Sbjct 214658 GDKGDLGDKGEKGDKGDLDGKGEKGDKGEKGDLDGKGEKGDLDGDKGEKGDLD 214837

Query 102 GEPGE 106  
GE G+  
Sbjct 214838 GEKGD 214852

Score = 38.1 bits (87), Expect = 0.032, Method: Compositional matrix adjust.  
Identities = 28/64 (44%), Positives = 35/64 (55%), Gaps = 0/64 (0%)  
Frame = +2

Query 42 GIPGHPGHNGAPGRDGRDGTTPGEKGEKGDPLIGPKGDIGETGVPGAEGPRGFPGIQGRK 101  
GI G+ G G G G G G+KG KG+ G G KGD+G+ G G G +G G G K  
Sbjct 218693 GIKGNKGDKGDLDGDKGDKGDLGDKGTGKGNLGDKGIKGDLDGDKGDKGNLGDKGIKGDLDGDK 218872

Query 102 GEPG 105  
G+ G  
Sbjct 218873 GDKG 218884

Score = 38.1 bits (87), Expect = 0.034, Method: Compositional matrix adjust.  
Identities = 29/69 (42%), Positives = 37/69 (54%), Gaps = 3/69 (4%)  
Frame = +2

Query 41 AGIPGHPGHNGAPGRDGRDGTPEKKG---EKGDPLIGPKGDIGETGVPGAEGPRGFPGI 97  
AG+ G G G G G G+KG EKG+ G +G KGD GE G G +G +G G  
Sbjct 214466 AGVDAEQGDKGDKGDLGEKGDGDKGDLGEKGEKGDLDGDKGDKGEKGDLEKGDGKGEKGD 214645

Query 98 QGRKGEPEGE 106  
G KG+ G+  
Sbjct 214646 LGEKGDGKD 214672

Score = 38.1 bits (87), Expect = 0.034, Method: Compositional matrix adjust.  
Identities = 28/71 (39%), Positives = 37/71 (52%), Gaps = 9/71 (13%)  
Frame = +2

Query 45 GHPGHNGAPGRDGRDGTPEKGEKGDPLIGPKGDIGETGVPGAEGPRGF-----P 95  
G G G G G G G KG KGD G +G KGD+G+ G+ G +G +G  
Sbjct 218513 GFRGLKGDGDKGDKGDLGSKGNKGDGKGNLGDGDLGDKGDKGNKGDGDLGDKGDLGDK 218692

Query 96 GIQGRKGEPEGE 106  
GI+G KG+ G+  
Sbjct 218693 GIKGNKGDGKD 218725

Score = 37.7 bits (86), Expect = 0.040, Method: Compositional matrix adjust.  
Identities = 27/65 (42%), Positives = 37/65 (57%), Gaps = 0/65 (0%)  
Frame = +2

Query 42 GIPGHPGHNGAPGRDGRDGTPEKGEKGDPLIGPKGDIGETGVPGAEGPRGFPGIQGRK 101  
G G G G G G G GEKG+KG+ G +G KG+ G+ G G +G +G G +G K  
Sbjct 214676 GDKGEKGDGDLGEKGEKGDGKGEKGDGDLGEKGEKGDGDLGDKGEKGDLEKGDGK 214855

Query 102 GEPGE 106  
G+ G+  
Sbjct 214856 GDLGK 214870

Score = 37.7 bits (86), Expect = 0.044, Method: Compositional matrix adjust.  
Identities = 27/65 (42%), Positives = 36/65 (55%), Gaps = 0/65 (0%)  
Frame = +2

Query 42 GIPGHPGHNGAPGRDGRDGTPEKGEKGDPLIGPKGDIGETGVPGAEGPRGFPGIQGRK 101  
G G G G+ G G G G+KG+ GD G+ G KGD G+ G G G +G G +G K  
Sbjct 218540 GDKGIKGDLDGSKGNKGDGKGNLGDGDLGDKGDKGDLGDKGDLGDKGDKGDKGDK 218719

Query 102 GEPGE 106  
G+ G+  
Sbjct 218720 GDLGD 218734

Score = 37.7 bits (86), Expect = 0.045, Method: Compositional matrix adjust.  
Identities = 30/71 (42%), Positives = 37/71 (52%), Gaps = 6/71 (8%)  
Frame = +2

Query 42 GIPGHPGH-----NGAPGRDGRDGTPEKGEKGDPLIGPKGDIGETGVPGAEGPRGFP 95  
GI G G G G G G G+KG+KGD G G KGD+G+ G G +G G  
Sbjct 214442 GIKGEKGEAGVDAEQGDKGDKGDLGEKGDGDKGDLGEKGEKGDLDGDKGDKGEKGDLEK 214621

Query 96 GIQGRKGEPEGE 106  
G +G KG+ GE

Sbjct 214622 GDKGEKGD LGE 214654

Score = 37.7 bits (86), Expect = 0.046, Method: Compositional matrix adjust.  
Identities = 29/65 (45%), Positives = 35/65 (54%), Gaps = 0/65 (0%)  
Frame = +2

Query 42 GIPGHPGHNGAPGRDGRDGTTPGEKGEKGD PGLIGPKGDIGETGVPGAEGPRGFPGIQGRK 101  
G G G G G G D G+KG+KGD G G KGD G+ G G +G G G +G K  
Sbjct 214424 GEKGDIGIKGEKGEAGVDAEQGDKGDKGDLGEKGD KDKGDLGEKGEKGD LGDKGDKGEK 214603

Query 102 GEPGE 106  
G+ GE  
Sbjct 214604 GDLGE 214618

Score = 37.4 bits (85), Expect = 0.054, Method: Compositional matrix adjust.  
Identities = 28/67 (42%), Positives = 35/67 (52%), Gaps = 0/67 (0%)  
Frame = +2

Query 40 MAGIPGHPGHNGAPGRDGRDGTTPGEKGEKGD PGLIGPKGDIGETGVPGAEGPRGFPGIQG 99  
+ G G G G G G G G+KG KGD G G KGD+G+ G+ G G +G G G  
Sbjct 157046 IKGDLGDKGIKGD LGDKGIKGD LGDKGIKGD LGDKGIKGD LGDKGIKGD LGDKGIKGD LG 157225

Query 100 RKGEPGE 106  
KG G+  
Sbjct 157226 DKGIKGD 157246

Score = 37.4 bits (85), Expect = 0.054, Method: Compositional matrix adjust.  
Identities = 28/67 (42%), Positives = 35/67 (52%), Gaps = 0/67 (0%)  
Frame = +2

Query 40 MAGIPGHPGHNGAPGRDGRDGTTPGEKGEKGD PGLIGPKGDIGETGVPGAEGPRGFPGIQG 99  
+ G G G G G G G G+KG KGD G G KGD+G+ G+ G G +G G G  
Sbjct 157073 IKGDLGDKGIKGD LGDKGIKGD LGDKGIKGD LGDKGIKGD LGDKGIKGD LGDKGIKGD LG 157252

Query 100 RKGEPGE 106  
KG G+  
Sbjct 157253 DKGIKGD 157273

Score = 37.4 bits (85), Expect = 0.054, Method: Compositional matrix adjust.  
Identities = 28/67 (42%), Positives = 35/67 (52%), Gaps = 0/67 (0%)  
Frame = +2

Query 40 MAGIPGHPGHNGAPGRDGRDGTTPGEKGEKGD PGLIGPKGDIGETGVPGAEGPRGFPGIQG 99  
+ G G G G G G G G+KG KGD G G KGD+G+ G+ G G +G G G  
Sbjct 157100 IKGDLGDKGIKGD LGDKGIKGD LGDKGIKGD LGDKGIKGD LGDKGIKGD LGDKGIKGD LG 157279

Query 100 RKGEPGE 106  
KG G+  
Sbjct 157280 DKGIKGD 157300

Score = 37.4 bits (85), Expect = 0.054, Method: Compositional matrix adjust.  
Identities = 29/65 (45%), Positives = 34/65 (52%), Gaps = 0/65 (0%)  
Frame = +2

Query 42 GIPGHPGHNGAPGRDGRDGTTPGEKGEKGDPLIGPKGDIGETGVPGAEGPRGFPGIQGRK 101  
G G G G G G G GEKG+ GD G G KGD+GE G G +G G G +G  
Sbjct 214496 GDKGDLGEKGDKGDKGDLGEKGEKGDLDKDKGDKGEKGDLDGEKGDKGDKGEKGDLDGEKGDKGDL 214675

Query 102 GEPGE 106  
G+ GE  
Sbjct 214676 GDKGE 214690

Score = 37.4 bits (85), Expect = 0.064, Method: Compositional matrix adjust.  
Identities = 22/42 (52%), Positives = 26/42 (62%), Gaps = 0/42 (0%)  
Frame = +2

Query 65 KGEKGDPLIGPKGDIGETGVPGAEGPRGFPGIQGRKGEPE 106  
KG+KGD G G KGD+GE G G G +G GI KGE G+  
Sbjct 212540 KGDKGDLDGEKGTGDLGEKGTGDLGEKGEAGIDAEEKGEKGD 212665

Score = 37.4 bits (85), Expect = 0.065, Method: Compositional matrix adjust.  
Identities = 26/59 (44%), Positives = 36/59 (61%), Gaps = 0/59 (0%)  
Frame = +3

Query 48 GHNGAPGRDGRDGTTPGEKGEKGDPLIGPKGDIGETGVPGAEGPRGFPGIQGRKGEPE 106  
G G G G G G+KG+ GD GL G KGD+G+ G+ G +G +G G +G KG+ G+  
Sbjct 261837 GLKGDKGDLDIGLKGDKGDLGDIKGDKGDLDIGLKGDKGDKGDLGTGDKGDLGD 262013

Score = 37.4 bits (85), Expect = 0.067, Method: Compositional matrix adjust.  
Identities = 29/65 (45%), Positives = 34/65 (52%), Gaps = 0/65 (0%)  
Frame = +2

Query 42 GIPGHPGHNGAPGRDGRDGTTPGEKGEKGDPLIGPKGDIGETGVPGAEGPRGFPGIQGRK 101  
G G G G G G G GEKG+ G+ G G KGD+GE G G G +G G +G  
Sbjct 214532 GDKGDLGEKGEKGDLDKDKGDKGEKGDLDGEKGDKGDLGDKGEKGDLDKDKGEKGDKGDL 214711

Query 102 GEPGE 106  
GE GE  
Sbjct 214712 GEKGE 214726

Score = 37.0 bits (84), Expect = 0.072, Method: Compositional matrix adjust.  
Identities = 29/67 (43%), Positives = 36/67 (54%), Gaps = 0/67 (0%)  
Frame = +2

Query 40 MAGIPGHPGHNGAPGRDGRDGTTPGEKGEKGDPLIGPKGDIGETGVPGAEGPRGFPGIQG 99  
+ G G G NG G G G G+KGE G GL G KGD G G G++G +G G G  
Sbjct 218426 VNGQKGDKGQNGIKGLKGNKGEKGDKGELGFRGLKGDKGDKGIKGDLDGSKGNKGDKNLG 218605

Query 100 RKGEPE 106  
KG+ G+  
Sbjct 218606 DKGDLGD 218626

Score = 37.0 bits (84), Expect = 0.075, Method: Compositional matrix adjust.  
Identities = 44/146 (30%), Positives = 57/146 (39%), Gaps = 44/146 (30%)  
Frame = +1

Query 35 ACTGWMAGIPGHPGHNGAPGRDGRDGTTPGEKGEKGD----- 70  
 G + G PG G G G G G GEKG+KGD  
 Sbjct 263623 VLVGNLTGPPGPSGSQGIKGDPIQGIKGEKGDKGDGDTTNIIGIKGDKGDKGDKDIGNTGL 263802

Query 71 ---PGLIGPKGDIGETGVPGAEGPRGFPGIQ-----GRKGEPEGAYVYRSAFSVG 118  
 G +G KGDIG+TG+ G +G +G G Q GEPG+ Y+ + V  
 Sbjct 263803 KGEKGDLDGEKGDIGDTGLKGDGDKGEIGSQIFTGFGAPPDDLGEKGD-IYIDLNTGDV- 263976

Query 119 LETYVTIPNMPPIRFT---KIFYNQON 141  
 Y I ++P+ IF QON  
 Sbjct 263977 ---YKIQDVPLTINNSPNIFSVQON 264045

Score = 37.0 bits (84), Expect = 0.090, Method: Compositional matrix adjust.  
 Identities = 28/69 (41%), Positives = 37/69 (54%), Gaps = 3/69 (4%)  
 Frame = +2

Query 41 AGIPGHPGHNGAPGRDGRDGTTPGEKGEKGDPLIGPKGDIGETGVPGAEGPRGFPG---I 97  
 +G G G+ G G G G G KG+ GD G +G KGD G G G +G +G PG  
 Sbjct 212045 SGDKGDLGNKGDKGSIGNKGDGKNGKDSGDKGDLGDKGDKSLGDKGDKGIKGEPSAVF 212224

Query 98 QGRKGEPEGE 106  
 +G KG+ G+  
 Sbjct 212225 KGEKGDKGD 212251

>NC\_027386.1 Propionibacterium phage PHL152M00, complete genome  
 Length=29247

Score = 45.8 bits (107), Expect = 1e-04, Method: Compositional matrix adjust.  
 Identities = 32/78 (41%), Positives = 41/78 (53%), Gaps = 0/78 (0%)  
 Frame = +3

Query 40 MAGIPGHPGHNGAPGRDGRDGTTPGEKGEKGDPLIGPKGDIGETGVPGAEGPRGFPGIQG 99  
 + G+ G GH+G PGR G DG G G+ G G+ G +GD G G G +GP+G G G  
 Sbjct 14973 LPGVNGSDGHDGVPGRAGADGVAGVDGKDGANGVDGERGDQGPAGSAGPQGPQGERGPAG 15152

Query 100 RKGEPEGAYVYRSAFSV 117  
 G G+ RS SV  
 Sbjct 15153 ANGS DGKDGKDGGRSVSV 15206

Score = 41.6 bits (96), Expect = 0.002, Method: Compositional matrix adjust.  
 Identities = 34/84 (40%), Positives = 40/84 (48%), Gaps = 4/84 (5%)  
 Frame = +3

Query 42 GIPGHPGHNGAPGRDGRDGTTPGEKGEKGDPLIGPKGDIGETGVPGAEGPRGFPGIQGRK 101  
 G+PG G +G G DG+DG G GE+GD GP G G G G GP G G G+  
 Sbjct 15006 GVPGRAGADGVAGVDGKDGANGVDGERGDQ---GPAGSAGPQGPQGERGPAGANGSDGKD 15176

Query 102 GEPGEGAY-VYRSAFSVGLITYVT 124  
 G+ G VY S L VT  
 Sbjct 15177 GKDGSRVSVYCSGGGACL\*NIVT 15248

>NC\_028881.1 Enterobacteria phage vB\_EcoM\_VR5, complete genome  
 Length=170473

Score = 45.8 bits (107), Expect = 1e-04, Method: Compositional matrix adjust.  
Identities = 36/85 (42%), Positives = 43/85 (51%), Gaps = 18/85 (21%)  
Frame = +1

Query 40 MAGIPGHPGHNGAPGRDGRDGTTPGEKGEKGDPLG-----IGPKGDIGETGVPGAEG 90  
+ GI G PG NG G G G G +G +GD GL IGPKG GETG G +G  
Sbjct 107854 LTGIKGEPEGNDIGPQGNQGPVGPQGIQGD TGLQGVPENGAIGPKGIQGETGAQGIQG 108033

Query 91 PRGF-----PGIQGRKGEPGE 106  
P+G GIQG KG+ G+  
Sbjct 108034 PQGLQGDPTQGPQGIQGLKGD KGD 108108

Score = 44.7 bits (104), Expect = 3e-04, Method: Compositional matrix adjust.  
Identities = 32/71 (45%), Positives = 40/71 (56%), Gaps = 6/71 (8%)  
Frame = +1

Query 42 GIPGHPGHNGAPGRDGRDGTTPGEKGEKGDPLIGP-----KGDIGETGVPGAEGPRGFP 95  
GI G G G G G G G KG+KG+ GL GP +G+ GETG PG +G +G  
Sbjct 108400 GIQGPQGIQGPKGD TGETGLQGLKGD KGETGLTGPQGLQIRGEQGETGAPGIQGIQGIA 108579

Query 96 GIQGRKGEPGE 106  
G QG KG+ G+  
Sbjct 108580 GDQGP KGD TGD 108612

Score = 42.0 bits (97), Expect = 0.002, Method: Compositional matrix adjust.  
Identities = 28/64 (44%), Positives = 38/64 (59%), Gaps = 3/64 (5%)  
Frame = +1

Query 42 GIPGHPGHNGAPGRDGRDGTTPGEKGEKGDPLIGPKGDIGETGVPGAEGPRGFPGIQGRK 101  
GI G G G PG +G G G +GE G G+ GP+G G+ PG +GP+G G++G K  
Sbjct 107932 GIQGD TGLQGVPENGAIGPKGIQGETGAQGIQGPQGLQGD---PGTQGPQGIQGLKGD K 108102

Query 102 GEPG 105  
G+ G  
Sbjct 108103 GDQG 108114

Score = 41.6 bits (96), Expect = 0.002, Method: Compositional matrix adjust.  
Identities = 29/61 (48%), Positives = 34/61 (56%), Gaps = 0/61 (0%)  
Frame = +1

Query 45 GHPGHNGAPGRDGRDGTTPGEKGEKGDPLIGPKGDIGETGVPGAEGPRGFPGIQGRKGEP 104  
G G G G G G G KG+ G+ GL G KGD GETG+ G +G +G G QG G P  
Sbjct 108373 GVEGAQGPQGIQGPQGIQGP KGD TGETGLQGLKGD KGETGLTGPQGLQIRGEQGETGAP 108552

Query 105 G 105  
G  
Sbjct 108553 G 108555

Score = 41.2 bits (95), Expect = 0.003, Method: Compositional matrix adjust.  
Identities = 30/79 (38%), Positives = 41/79 (52%), Gaps = 3/79 (4%)  
Frame = +1

Query 42 GIPGHPGHNGAPGRDGRDGTTPGEKGEKGDPLIGPKGD---IGETGVPGAEGPRGFPGIQ 98  
GI G G G G G G PG +G +G GL G KGD GETG G +G +G PG +

Sbjct 107995 GIQGETGAQGIQGPQGLQGDPTQGPQGIQGLKGDKGDQGIQGETGAQGIQGIQGVPGAK 108174

Query 99 GRKGEPEGAYVYRSAFSV 117  
 G G G ++ ++++

Sbjct 108175 GDIGPVGPAGLTWKGSWNI 108231

Score = 40.8 bits (94), Expect = 0.005, Method: Compositional matrix adjust.  
 Identities = 32/77 (42%), Positives = 39/77 (51%), Gaps = 12/77 (16%)  
 Frame = +1

Query 42 GIPGHPGHNGA-----PGRDGRDGTTPGEKGEKGDPLIGP-----KGDIGETGVPGAE 89  
 G+ G PG NGA G G G G +G +GDPG GP KGD G+ G+ G

Sbjct 107950 GLQGVPGENGAIGPKGIQGETGAQGIQGPQGLQGDPTQGPQGIQGLKGDKGDQGIQGET 108129

Query 90 GPRGFPGIQGRKGEPE 106  
 G +G GIQG G G+

Sbjct 108130 GAQGIQGIQGVPGAKGD 108180

Score = 40.8 bits (94), Expect = 0.005, Method: Compositional matrix adjust.  
 Identities = 28/62 (45%), Positives = 37/62 (60%), Gaps = 6/62 (10%)  
 Frame = +1

Query 51 GAPGRDGRDGTTPGEKGEKGDPLIGPKGDIGETGVPGAEGPRGFPGI-----QGRKGEPE 104  
 G GR G +G G +G +G G+ GPKGD GETG+ G +G +G G+ QG +GE

Sbjct 108355 GPEGRQGVVEGAQGPQGIQGPQGIQGPQKGDGTGETGLQGLKGDKGETGLTGPQGLQGIQGEQ 108534

Query 105 GE 106  
 GE

Sbjct 108535 GE 108540

>NC\_031238.1 Mycobacterium phage Catalina, complete genome  
 Length=53411

Score = 45.4 bits (106), Expect = 1e-04, Method: Compositional matrix adjust.  
 Identities = 40/99 (40%), Positives = 48/99 (48%), Gaps = 15/99 (15%)  
 Frame = +2

Query 41 AGIPGHPGHNGAPGRDGRDGTTPGE---KGEKGDPLIGPKGDI-----GETGVPGAEGP 91  
 AG PG PG GA G G G G+ +G KGD G GPKGD G+TG GA+GP

Sbjct 4919 AGAPGEPGPTGATGATGTPQGPQKGDTPQGPQKGDGAQGPQKGDGATGAQGP 5098

Query 92 RGFPFIQGRKGEPEG-----AYVYRSAFSVGLETYVT 124  
 G G QG G P V ++A+ G +T T

Sbjct 5099 TGATGPPQPSGTPSSTNTVLDVFKVTAAYDAGPKTATT 5215

Score = 39.7 bits (91), Expect = 0.010, Method: Compositional matrix adjust.  
 Identities = 27/49 (55%), Positives = 29/49 (59%), Gaps = 0/49 (0%)  
 Frame = +2

Query 54 GRDGRDGTTPGEKGEKGDPLIGPKGDIGETGVPGAEGPRGFPGIQGRKG 102  
 G G G G G KGDPG GPKGD G TG GA GP+G G QG +G

Sbjct 4607 GPAGPQGA VPLGPKGDPGDTGPKGDTGATGPPQATGPKGDTGAQGPQ 4753



Score = 37.4 bits (85), Expect = 0.061, Method: Compositional matrix adjust.  
Identities = 31/64 (48%), Positives = 34/64 (53%), Gaps = 0/64 (0%)  
Frame = +2

Query 42 GIPGHPGHNGAPGRDGRDGTTPGEKGEKGDPLIGPKGDIGETGVPGAEGPRGFPGIQGRK 101  
GI G G G G G G G G+KG+ GD G GPKGD G+ G PG G G G G  
Sbjct 4751 GIQGATGPQGLQGPKGDTGPKGDKGDTGDLGPQGPKGDKGDKGDPGTAGLTGLQGPAGAP 4930

Query 102 GEPG 105  
GEPG  
Sbjct 4931 GEPG 4942

>NC\_005902.1 Lymphocystis disease virus - isolate China, complete genome  
Length=186250

Score = 45.4 bits (106), Expect = 1e-04, Method: Compositional matrix adjust.  
Identities = 35/72 (49%), Positives = 41/72 (57%), Gaps = 10/72 (14%)  
Frame = +3

Query 42 GIPGHPGHNGAPGRDGRDGTTPGEKGEKGDPLIGPKGDIGETGVPGAEGPRGF 94  
G PG PG G GRDG+ G PG KG++G+ G +IGP G GE G+P GPRG  
Sbjct 112869 GAPGMPGDPGRDGRDGTQKGLPGFKGDRGERGFSCNESKVIKSGPQGEQGLP---GPRGL 113039

Query 95 PGIQGRKGEPE 106  
PG G KG G  
Sbjct 113040 PGSDGLKGSAGS 113075

Score = 41.6 bits (96), Expect = 0.003, Method: Compositional matrix adjust.  
Identities = 34/73 (47%), Positives = 40/73 (55%), Gaps = 6/73 (8%)  
Frame = -3

Query 40 MAGIPGHPGHNGAPGRDGRDGTTPGEKGEKGDPLIGP-----KGDIGETGVPGAEGPRG 93  
+ G+ G G +G PG+ G G G G KGD GL GP KGDIG G G+EG G  
Sbjct 168275 LPGVRGFTGESGEPGKKGDSGQKGYPGSKGDIGLHGPKGEIGLKGDIGYQGFKGSEGELG 168096

Query 94 FPGIQGRKGEPE 106  
G QG KG+ GE  
Sbjct 168095 KQGDQGDKGDKGE 168057

Score = 38.1 bits (87), Expect = 0.032, Method: Compositional matrix adjust.  
Identities = 36/98 (37%), Positives = 53/98 (54%), Gaps = 9/98 (9%)  
Frame = -3

Query 27 VLLPLPKGACTGWMAGIPGHPGHNGAPGRDGRDGTTPGEKGEKGDPLIGPKGD---IGET 83  
+ L PKG + G G+ G G+ G G+ G G+KG+KG+ GL G KG +G+T  
Sbjct 168182 IGLHGPKGEIG--LKGDIGYQGFKGSEGELGKQGDQGDKGDKGENGLRGYKGHKGYLGDT 168009

Query 84 GVPGAEGPR---GFPGIQGRKGEPEG-EGAYVYRSAFEV 117  
G+PG G + G+ G G KG+PG EG + + +  
Sbjct 168008 GIPGKRGEKGESGWSGTPGEKGDPTGTEGTFGEKGEKGI 167895

Score = 37.0 bits (84), Expect = 0.078, Method: Compositional matrix adjust.  
Identities = 29/60 (48%), Positives = 32/60 (53%), Gaps = 0/60 (0%)  
Frame = -3

Query 46 HPGHNGAPGRDGRDGTTPGEKGEKGDPLIGPKGDIGETGVPGAEGPRGFPGIQRKGEPPG 105  
PG G G DG G GEKG KGD G G KG+ G GV G G G PG +G G+ G  
Sbjct 168383 EPGDTGNHGIDGEGKKGAGEKGSKGDGARGIKGNKGLPGVRGFTGESGEPGKKGDSGQKG 168204

>NC\_030394.2 Short-finned eel ranavirus isolate ANGA14001, complete genome  
Length=126965

Score = 45.4 bits (106), Expect = 1e-04, Method: Compositional matrix adjust.  
Identities = 30/61 (49%), Positives = 35/61 (57%), Gaps = 0/61 (0%)  
Frame = +3

Query 45 GHPGHNGAPGRDGRDGTTPGEKGEKGDPLIGPKGDIGETGVPGAEGPRGFPGIQRKGEPPG 104  
G G G PG+DG DG G KG+ G G GP+G G+ G G GP+G G G KGEP  
Sbjct 15117 GDAGERGYPGKDGADGPKGPKGDGPRGEKGPGRGPKGDVGARGLVGPKGDAGPAGAKGEP 15296

Query 105 G 105  
G  
Sbjct 15297 G 15299

>NC\_027357.1 Propionibacterium phage PHL025M00, complete genome  
Length=29496

Score = 45.4 bits (106), Expect = 1e-04, Method: Compositional matrix adjust.  
Identities = 36/94 (38%), Positives = 49/94 (52%), Gaps = 13/94 (14%)  
Frame = +3

Query 40 MAGIPGHPGHNGAPGRDGRDGTTPGEKGEKGDPLIGPKGDIGETGVPGAEGPRGFPGIQRK 99  
+AG G G NG G DGRDG+ GE+GE+G G GP+G GE G GP G G G  
Sbjct 15063 VAGRAGADGVNGVDGADGRDGSAGERGEQQPSGPAGPQQAQGER---GERGPAGVNGSDG 15233

Query 100 RKGEPGEGAYVYRSFAFSVGLETYVTIPNMPPIRFT 133  
+ G+ G RS SV Y + + + + +  
Sbjct 15234 KDGKDG-----RSVVSV----YCSDGRLVVKYS 15305

Score = 37.0 bits (84), Expect = 0.072, Method: Compositional matrix adjust.  
Identities = 29/67 (43%), Positives = 35/67 (52%), Gaps = 0/67 (0%)  
Frame = +3

Query 40 MAGIPGHPGHNGAPGRDGRDGTTPGEKGEKGDPLIGPKGDIGETGVPGAEGPRGFPGIQRK 99  
+ G+ G G GA G+DG DG G G G G+ G G G G G +GP G G QQ  
Sbjct 15000 LNGVKGPDLPGANGKDGVDGVAGRAGADGVNGVDGADGRDGSAGERGEQQPSGPAGPQG 15179

Query 100 RKGEPGE 106  
+GE GE  
Sbjct 15180 AQGERGE 15200

>NC\_027401.1 Propionibacterium phage PHL095N00, complete genome  
Length=29751

Score = 45.4 bits (106), Expect = 2e-04, Method: Compositional matrix adjust.  
Identities = 28/60 (47%), Positives = 35/60 (58%), Gaps = 0/60 (0%)  
Frame = +3

Query 42 GIPGHPGHNGAPGRDGRDGTPEKGEKGDPLIGPKGDIGETGVPGAEGPRGFPGIQGRK 101  
G+PG G +G G DGRDG+ GE+G+ G G GP+G+ GE G G G G GR  
Sbjct 15045 GVPGRAGADGVNGADGRDGSAGERGDVGPSPGAPQGERGERGPAGTNGSDGKDGKDGRS 15224

Score = 41.2 bits (95), Expect = 0.004, Method: Compositional matrix adjust.  
Identities = 32/94 (34%), Positives = 46/94 (49%), Gaps = 7/94 (7%)  
Frame = +3

Query 40 MAGIPGHPGHNGAPGRDGRDGTPEKGEKGDPLIGPKGDIGETGVPGAEGPRGFPGIQG 99  
+ G+ G GH+G PGR G DG G G G G +GD+G +G G +G RG G G  
Sbjct 15012 LPGVNGSDGHDGVPGRAGADGVNGADGRDGS---AGERGDVGPSPGAPQGERGERGPAG 15182

Query 100 RKGEPGEGAYVYRSFAFSVGLETYVTIPNMPPIRFT 133  
G G+ RS SV Y + + ++++  
Sbjct 15183 TNGSDGKDGKDGSRVSVS----YCSGRLVVKYS 15272

>NC\_004167.1 Bacteriophage phi-105 DNA, complete sequence  
Length=39325

Score = 45.4 bits (106), Expect = 2e-04, Method: Compositional matrix adjust.  
Identities = 26/53 (49%), Positives = 32/53 (60%), Gaps = 0/53 (0%)  
Frame = +1

Query 45 GHPGHNGAPGRDGRDGTPEKGEKGDPLIGPKGDIGETGVPGAEGPRGFPGI 97  
G PG G G G G PGE+G +G+PG GPKGD GE G G +G +G P +  
Sbjct 6154 GEPGEPGPQGPQKDGKGEPEQGPQGEPPAGPKGDTGEQGPQGEKGDGKDPVAV 6312

Score = 43.5 bits (101), Expect = 6e-04, Method: Compositional matrix adjust.  
Identities = 31/64 (48%), Positives = 37/64 (58%), Gaps = 3/64 (5%)  
Frame = +1

Query 43 IPGHPGHNGAPGRDGRDGTPEKGEKGDPLIGPKGDIGETGVPGAEGPRGFPGIQGRKG 102  
+ G G G G G G G +GE G+PG GPKGD GE PG +GP+G PG G KG  
Sbjct 6085 VKGLQGEKGEKGNKGDGTGKQGPQGEPEGPPQGPQKDGKGE---PGEQGPQGEPPAGPKG 6255

Query 103 EPGE 106  
+ GE  
Sbjct 6256 DTGE 6267

Score = 39.3 bits (90), Expect = 0.013, Method: Compositional matrix adjust.  
Identities = 32/91 (35%), Positives = 43/91 (47%), Gaps = 5/91 (5%)  
Frame = +1

Query 45 GHPGHNGAPGRDGRDGTPEKGEKGDPLIGPKGDIGETGVPGAEGPRGFPGIQGRKGEP 104  
G+ G G G G G PG +G KGD G G +G GE G G +G G G QG KG+  
Sbjct 6118 GNKGDGTGKQGPQGEPEGPPQGPQKDGKGEPEQGPQGEPPAGPKGDTGEQGPQGEKGDGK 6297

Query 105 GEGAYVYRSFAFSVGLETYVTIPNMPPIRFTKI 135  
G+ A + S+ T+ + +R I  
Sbjct 6298 GDPAVIEESSI-----TFEMLAEKSVRSKNI 6375

>NC\_007056.1 Staphylococcus phage EW, complete genome  
Length=45286

Score = 45.4 bits (106), Expect = 2e-04, Method: Compositional matrix adjust.  
Identities = 38/112 (34%), Positives = 48/112 (43%), Gaps = 23/112 (21%)  
Frame = +3

Query 45 GHPGHNGAPGRDGRDGTTPGEKGEKGDPLIGPKGD---IGETGVPGAEGPRGFPGIQRK 101  
G G G G G G G++GE+G G +GPKGD IG G GA GP+G G QG +  
Sbjct 21684 GARGETGLTGAKGAKGDKDRGEQGFQGPVGPKGDKDIGPVGATGAIGPKGDRGEQGPQ 21863

Query 102 GEPGEGAYVYRSFAFSVGLETYVTIPNMPPIRFTKIFYNQQNHYDGSTGKFHCN 153  
G G+ IRF + QQN G+ G+ N  
Sbjct 21864 GPKGDEGV-----IRFENLTQEQQNLLKGAPGESIIN 21959

>NC\_021791.1 Cellulophaga phage phi12:1, complete genome  
Length=39148

Score = 45.1 bits (105), Expect = 2e-04, Method: Compositional matrix adjust.  
Identities = 29/64 (45%), Positives = 35/64 (55%), Gaps = 0/64 (0%)  
Frame = +1

Query 42 GIPGHPGHNGAPGRDGRDGTTPGEKGEKGDPLIGPKGDIGETGVPGAEGPRGFPGIQRK 101  
G PG G G G G G +GE G G+ G KGD G+TG G +G +G G QG +  
Sbjct 26566 GEPGEQGIQGETGPQGLQGEQGLQGEDGAQGIQGIKGDGTGDTGPQGIQGEQGLQGEQGLQ 26745

Query 102 GEPG 105  
GE G  
Sbjct 26746 GEQG 26757

Score = 44.3 bits (103), Expect = 3e-04, Method: Compositional matrix adjust.  
Identities = 29/67 (43%), Positives = 37/67 (55%), Gaps = 0/67 (0%)  
Frame = +1

Query 40 MAGIPGHPGHNGAPGRDGRDGTTPGEKGEKGDPLIGPKGDIGETGVPGAEGPRGFPGIQQ 99  
+ G G G G G G DG G +G KGD G GP+G GE G+ G +G +G G+QG  
Sbjct 26587 IQGETGPQGLQGEQGLQGEDGAQGIQGIKGDGTGDTGPQGIQGEQGLQGEQGLQGEQGLQ 26766

Query 100 RKGEPGE 106  
+G GE  
Sbjct 26767 EQGLQGE 26787

Score = 41.2 bits (95), Expect = 0.003, Method: Compositional matrix adjust.  
Identities = 42/156 (27%), Positives = 61/156 (39%), Gaps = 8/156 (5%)  
Frame = +1

Query 45 GHPGHNGAPGRDGRDGTTPGEKGEKGDPLIGPKGDIGETGVPGAEGPRGFPGIQRKGP 104  
G PG G G G G GE+G +G+ G G +G G+TG G +G +G G+QG +G  
Sbjct 26566 GEPGEQGIQGETGPQGLQGEQGLQGEDGAQGIQGIKGDGTGDTGPQGIQGEQGLQGEQGLQ 26745

Query 105 GEGAYVYRSFAF--SVGLETYVTIPNMPPIRFTKIFYNQQNHYDGSTGK---FHCNIPGLYY 159  
GE G T TI + I K+ Q + S N  
Sbjct 26746 GEQGLQGEQGLQGEAGPSTPQTIDDGSIVEAKLSTEVQTKINDSATTQELEEANALNRKN 26925

Query 160 FAYHITVYMKDVKVSLFKKDKAMLFTYDQYQENNVD 195  
+ + D L K + +++ Q N+VD  
Sbjct 26926 ISVDFLISSDDSGAILKKSNSIIRATVQ---NDVD 27024



Sbjct 155185 GVDGVDGINGKDGKDRDGV DGINGKDGKDGVDGKDGVDGVDGKDGVDGKDGKDGVDGKDG 155006  
Query 102 GEPG 105  
G+ G  
Sbjct 155005 GKDG 154994

Score = 41.2 bits (95), Expect = 0.003, Method: Compositional matrix adjust.  
Identities = 45/175 (26%), Positives = 71/175 (41%), Gaps = 5/175 (3%)  
Frame = -2

Query 41 AGIPGHPGHNGAPGRDGRDGTPEKGEKGDPLIGPKGDIGETGVPGAEGPRGFPGIQGR 100  
AG+ G G G G G G GE G G GLIGP G +G TG+ G GP G G G  
Sbjct 446229 AGLVGPTGIAGEVGP TGLVGPTGEV GATGPTGLIGPTGLVGPTGIAGEVGP TGPVGATGD 446050

Query 101 KGEPGEGAYVYRSFAFSV GLETYVTIPNMP I RFTKIFYNQQNH YDGSTGKFHCNIPGLYYF 160  
G G G Y +++G + ++ + H G++ N Y  
Sbjct 446049 AGATGAGLAS YAYIYNLGAQVVP LEADITYDTNGVILGPITHAPGTSTITLGNA--GNYA 445876

Query 161 AYHITVYMKDVKVS LFKKDKAML-FTYDQYQENNV DQASGSVLLHLEVG DQVWLQ 214  
+ ++ + +L++ + TY ++ SG V+L GD + ++  
Sbjct 445875 VWFSESGVEPNQFTLYQNGAPVAGSTYGS GAGTQIN--SGMVILTASAGDVLTVR 445717

Score = 41.2 bits (95), Expect = 0.004, Method: Compositional matrix adjust.  
Identities = 33/75 (44%), Positives = 37/75 (49%), Gaps = 5/75 (7%)  
Frame = -1

Query 32 PKGACTGWMAGIPGHPGHNGAPGRDGRDGTPEKGEKGDPLIGPKGDIGETGVPGAEGP 91  
PKG C G G G GA G+DG G G KG+ G G GPKG G+ G G GP  
Sbjct 308353 PKGDC-----GKDGCTGPKGADGKDGCTGPTGPKGDCGKDGCTGPKGADGKDGCTGPTGP 308189

Query 92 RGFPGIQGRKGEPE 106  
+G G G G GE  
Sbjct 308188 KGDCGKDGCTGPAGE 308144

Score = 40.8 bits (94), Expect = 0.004, Method: Compositional matrix adjust.  
Identities = 26/66 (39%), Positives = 34/66 (52%), Gaps = 0/66 (0%)  
Frame = -1

Query 40 MAGIPGHPGHNGAPGRDGRDGTPEKGEKGDPLIGPKGDIGETGVPGAEGPRGFPGIQG 99  
+ G G G +G G+DG+DG G+ G G G G G G GV G +G G GI G  
Sbjct 155335 VD GKDGV DGRDGV D GKDGV D GKDGRDGV D GKDGV D GKDGV D GKDGV D GING 155156

Query 100 RKGEPE 105  
+ G+ G  
Sbjct 155155 KDGKDG 155138

Score = 40.4 bits (93), Expect = 0.006, Method: Compositional matrix adjust.  
Identities = 58/215 (27%), Positives = 89/215 (41%), Gaps = 22/215 (10%)  
Frame = -1

Query 45 GHPGHNGAPGRDGRDGTPEKGEKGDPLIGPKGDIGETGVPGAEGPRGFPGIQGRKGEPE 104  
G G G G G G GE G G+ G IGP G +G TG G +GP+G G G G  
Sbjct 555805 GVTGEIGPTGSVGLTGPVGETGANGNVGTIGPTGIMGATGQTGPDGPGQGPVGP TGTATGIE 555626

Query 105 GEGAYVYRSAFSVGLETYVTIPNMPPIRFTKIFYNQ-----QNHYDGSTGKFHC-NIPG 156  
 G FS+G + P + + I + +++D ++G F +IPG  
 Sbjct 555625 GPTGPGSIDFFSIGFSAFREDPIVLTQASNIVFVTDYQTTIPNSNFDPASGIFLVPISIP 555446

Query 157 L--YYF---AYHITVYMKDVKVSFLFKKDKAMLF-TYDQ----YQENNVDQASGSV--LLH 204  
 YF +Y + + +V+ + L T Q ++ NV + G V L  
 Sbjct 555445 TQGSYFLVSSYEASAVIGTGQVNFIVELAENLNPTLGQNRIVFRSANVTETEGQVFYLG 555266

Query 205 LEVGDQVWLQVYGEGERNGLYADNDNDSTFTGFLL 239  
 L G + ++V N + N +F GFL+  
 Sbjct 555265 LTPGTNISVRV--SVVLNAGASCTINRISFQGLV 555167

Score = 40.4 bits (93), Expect = 0.007, Method: Compositional matrix adjust.  
 Identities = 27/70 (39%), Positives = 35/70 (50%), Gaps = 6/70 (9%)  
 Frame = -1

Query 42 GIPGHPGHNGAPGRDGRDGTPEKEKEKDPGLIGPKGDIGETGV-----PGAEGPRGFP 95  
 G+ G G +G G+DGRDG G+ G G G+ G G G GV G +G G  
 Sbjct 155302 GVDGKDGKDGVDGKDGVDGKDGVDGVDGKDGVDGVDGKDGVDGVDGKDGKDGKDGVD 155123

Query 96 GIQGRKGEPE 105  
 GI G+ G+ G  
 Sbjct 155122 GINGKDGKDG 155093

Score = 39.3 bits (90), Expect = 0.013, Method: Compositional matrix adjust.  
 Identities = 31/75 (41%), Positives = 36/75 (48%), Gaps = 1/75 (1%)  
 Frame = -1

Query 32 PKGAC-TGWMAGIPGHPGHNGAPGRDGRDGTPEKEKEKDPGLIGPKGDIGETGVPGAEG 90  
 PKG C G G+ G NG G G G G+ G+ G G GPKGD G+ G G G  
 Sbjct 308668 PKGDCGRNGCTGPKGNDGKNGKDGCTGPKGNDGKNGKDGCTGATGPKGDCGKDGCTGPTG 308489

Query 91 PRGFPGIQGRKGEPE 105  
 P+G G G G G  
 Sbjct 308488 PKGDCGKDGCTGPKG 308444

Score = 38.5 bits (88), Expect = 0.023, Method: Compositional matrix adjust.  
 Identities = 25/61 (41%), Positives = 32/61 (52%), Gaps = 0/61 (0%)  
 Frame = -1

Query 42 GIPGHPGHNGAPGRDGRDGTPEKEKEKDPGLIGPKGDIGETGVPGAEGPRGFPGIQGRK 101  
 G G G++G G+DG G G KG+ G G GP G G+ G G GP+G G G+  
 Sbjct 308599 GCTGPKGNDGKNGKDGCTGATGPKGDCGKDGCTGPTGPKGDCGKDGCTGPKGADGKNGKD 308420

Query 102 G 102  
 G  
 Sbjct 308419 G 308417

Score = 37.7 bits (86), Expect = 0.047, Method: Compositional matrix adjust.  
 Identities = 35/84 (42%), Positives = 44/84 (52%), Gaps = 14/84 (17%)  
 Frame = -1

Query 32 PKGACTGWMAGIPGHPGHNGAPGRDGRDGTPEKEKEKDPGL-----IGPKGDIGE--- 82  
 PKG C G G G GA G++G+DG G KG++G G GPKGD G+

Sbjct 308488 PKGDC-----GKDGCTGPKGADGKNGKDGCTGPKGDQGLIGCTGLKGDTPGPKGDCGKDCG 308324  
Query 83 TGVPGAEGPRGFPGIQGRKGEPGE 106  
TG GA+G G G G KG+ G+  
Sbjct 308323 TGPKGADGKDGCTGPTGPKGDCGK 308252

Score = 37.4 bits (85), Expect = 0.053, Method: Compositional matrix adjust.  
Identities = 33/77 (43%), Positives = 37/77 (48%), Gaps = 5/77 (6%)  
Frame = -1

Query 32 PKGACTGWMAGIPGHPGHNGAPGRDGRDGTGPEKGEKGDPLIGPKGD---IGETGVPGA 88  
PKG C G G G G G+DG G G G+ G G GPKGD IG TG+ G  
Sbjct 308533 PKGDC--GKDGCTGPTGPKGDCGKDGCTGPKGADGKNGKDGCTGPKGDQGLIGCTGLKGD 308360  
Query 89 EGPRGFPGIQGRKGEPG 105  
GP+G G G G G  
Sbjct 308359 TGPKGDCGKDGCTGPKG 308309

Score = 37.0 bits (84), Expect = 0.089, Method: Compositional matrix adjust.  
Identities = 25/65 (38%), Positives = 33/65 (51%), Gaps = 0/65 (0%)  
Frame = -1

Query 42 GIPGHPGHNGAPGRDGRDGTGPEKGEKGDPLIGPKGDIGETGVPGAEGPRGFPGIQGRK 101  
G G G +G G+DG+DG G+ G G G G G G+ GV G +G G G G+  
Sbjct 155149 GKDGRDGVVDGKDGKDGVDGKDGVDGVDGKDGVDGKDGKDGVDGKDGKDGVDGKDGKDG 154970  
Query 102 GEPGE 106  
G G+  
Sbjct 154969 GVDGK 154955

Score = 37.0 bits (84), Expect = 0.090, Method: Compositional matrix adjust.  
Identities = 24/66 (36%), Positives = 33/66 (50%), Gaps = 0/66 (0%)  
Frame = -1

Query 40 MAGIPGHPGHNGAPGRDGRDGTGPEKGEKGDPLIGPKGDIGETGVPGAEGPRGFPGIQG 99  
+ G G G +G G+DG+DG G+ G G G+ G G G G G +G G G+ G  
Sbjct 155398 VDGKDGVDGRDGVVDGKDGKDGVDGKDGVDGRDGVVDGKDGKDGVDGKDGKDGVDGKDGVDG 155219  
Query 100 RKGEPG 105  
+ G G  
Sbjct 155218 KDGVDG 155201

Score = 36.6 bits (83), Expect = 0.097, Method: Compositional matrix adjust.  
Identities = 27/65 (42%), Positives = 33/65 (51%), Gaps = 0/65 (0%)  
Frame = -1

Query 42 GIPGHPGHNGAPGRDGRDGTGPEKGEKGDPLIGPKGDIGETGVPGAEGPRGFPGIQGRK 101  
G G G G G+DG G G KG+ G G GPKG G+ G G GP+G G+ G  
Sbjct 308554 GCTGATGPKGDCGKDGCTGPTGPKGDCGKDGCTGPKGADGKNGKDGCTGPKGDQGLIGCT 308375  
Query 102 GEPGE 106  
G G+  
Sbjct 308374 GLKGD 308360



>NC\_027621.1 Propionibacterium phage Wizzo, complete genome  
Length=29463

Score = 45.1 bits (105), Expect = 2e-04, Method: Compositional matrix adjust.  
Identities = 32/76 (42%), Positives = 41/76 (54%), Gaps = 0/76 (0%)  
Frame = +3

Query 42 GIPGHPGHNGAPGRDGRDGTPEKGEKGDPLIGPKGDIGETGVPGAEGPRGFPGIQGRK 101  
G+PG G +G G DGRDG+ GE+G+ G G G +G G G G +GP+G G G  
Sbjct 15036 GVPGRAGADGVNGADGRDGSAGERGDVGPSPAGLQGAQQGARGPIGPQGPQGSAGADGTN 15215

Query 102 GEPGEGAYVYRSAFSV 117  
G G+ RS SV  
Sbjct 15216 GRDGKDGKDGSRVSV 15263

Score = 37.0 bits (84), Expect = 0.072, Method: Compositional matrix adjust.  
Identities = 28/63 (44%), Positives = 32/63 (51%), Gaps = 0/63 (0%)  
Frame = +3

Query 40 MAGIPGHPGHNGAPGRDGRDGTPEKGEKGDPLIGPKGDIGETGVPGAEGPRGFPGIQG 99  
+ G+ G G GA G+DG DG PG G G G G G GE G G GP G G QG  
Sbjct 14976 LNGVKGPDLPGANGKDGVDGVPGRAGADGVNGADGRDGSAGERGDVGPSPAGLQGAQQG 15155

Query 100 RKG 102  
+G  
Sbjct 15156 ARG 15164

>NC\_027630.1 Propionibacterium phage Ouroboros, complete genome  
Length=29506

Score = 45.1 bits (105), Expect = 2e-04, Method: Compositional matrix adjust.  
Identities = 33/76 (43%), Positives = 39/76 (51%), Gaps = 6/76 (8%)  
Frame = +1

Query 42 GIPGHPGHNGAPGRDGRDGTPEKGEKGDPLIGPKGDIGETGVPGAEGPRGFPGIQGRK 101  
G+PG G +G G DG+DG G GE+GD G GP G G G G GP G G G+  
Sbjct 15010 GVPGRAGADGVNGADGKDGANGADGERGDVGPSPAGPQGAQQGGRGPAGANGSDGKD 15189

Query 102 GEPGEGAYVYRSAFSV 117  
G+ G RS SV  
Sbjct 15190 GKDG-----RSVSV 15219

>NC\_009015.1 Burkholderia ambifaria phage BcepF1, complete genome  
Length=72415

Score = 45.1 bits (105), Expect = 2e-04, Method: Compositional matrix adjust.  
Identities = 30/65 (46%), Positives = 37/65 (57%), Gaps = 0/65 (0%)  
Frame = -1

Query 38 GWMAGIPGHPGHNGAPGRDGRDGTPEKGEKGDPLIGPKGDIGETGVPGAEGPRGFPGI 97  
G +AG+ G G G G+DG PG KG+KGD G G KGD G+ GV G +G +G G  
Sbjct 65614 GAVAGLGTGTGPMGPQGPAGKDGAPGAKGDKGDAGTPGVKGGDDGDQGVKGDGKDKGDTGE 65435

Query 98 QGRKG 102

G G  
Sbjct 65434 TGPAG 65420

>NC\_029072.1 Salmonella phage 19, complete genome  
Length=94766

Score = 45.1 bits (105), Expect = 2e-04, Method: Compositional matrix adjust.  
Identities = 33/92 (36%), Positives = 48/92 (52%), Gaps = 8/92 (9%)  
Frame = +3

Query 45 GHPGHNGAPGRDGRDGTTPGEKGEKGDPLIGPKGDIGETGVPGAEGPRGFPGIQGRKGE 104  
G G G G G +G G +G +G G +GPKGD G+TG G GP+G G +G +GE  
Sbjct 10263 GQKGDQGPPEGPAGAEGPAGAEGPQGIQGPVGPKGDKGDTGSTGPIGPQGPQGPGRGDRGET 10442

Query 105 GEGAYVYRSAFSVGL-----ETYVTIPNM 128  
G GA V + +V + ++ +PN+  
Sbjct 10443 GYGARVLGTKGAVSDLPATGTPGDAWIIVPNL 10538

>NC\_025434.1 Shigella phage POCJ13, complete genome  
Length=62699

Score = 45.1 bits (105), Expect = 2e-04, Method: Compositional matrix adjust.  
Identities = 52/185 (28%), Positives = 75/185 (41%), Gaps = 19/185 (10%)  
Frame = +1

Query 48 GHNGAPGRDGRDGTTPGEKGEKGDPLIGPKDIGE-----TGVPGAEGPRGFPGIQGRK 101  
G G PG G G G KG++G+PG GP+G GE GV G GP G PG +G K  
Sbjct 39337 GPAGEPGPRGEPGPQGLKGRGEPGPTGPPQGPAGERGPQGPVAGPVPAGEFGAKGDK 39516

Query 102 GEPGEGAYVYRSAFSVGLETYVTIPNMPPIRFTKIFYNQQNHYDGSTGKFHCNIPGLYYFA 161  
G+PG G + SA + + N+ + F + Q D + I  
Sbjct 39517 GDPG-GTELLASANTW-TQPQTINGNLTVTGNGSFNDVQIRSDKRNKRNAIRIDNCLEKL 39690

Query 162 YHITVYMKDVK-----VSLFKKDKAMLFTYDQYQENNVDDQASGSVLLHLEVG DQVW 212  
+T Y+ +++ V LF +D L + ++ D SG L +  
Sbjct 39691 DLLTGYLYEIQNADGSWQQSVGLFAQD--ALKAQPELVTS DTDIISGEERFRLNYNGVIA 39864

Query 213 LQVYG 217  
L V G  
Sbjct 39865 LLVEG 39879

Score = 37.4 bits (85), Expect = 0.061, Method: Compositional matrix adjust.  
Identities = 29/62 (47%), Positives = 31/62 (50%), Gaps = 0/62 (0%)  
Frame = +1

Query 41 AGIPGHPGHNGAPGRDGRDGTTPGEKGEKGDPLIGPKGDIGETGVPGAEGPRGFPGIQGR 100  
AG G G G G G G GE GE+G G+ GP G G TG G G RG GIQG  
Sbjct 38692 AGPRGEKGEQGERGPQGLQGLKGETGERGPQGVQGPAGPTGATGPAGPRGERGEQGIQGP 38871

Query 101 KG 102  
G  
Sbjct 38872 AG 38877

>NC\_011357.1 Stx2-converting phage 1717, complete prophage genome

Length=62147

Score = 45.1 bits (105), Expect = 2e-04, Method: Compositional matrix adjust.  
Identities = 33/72 (46%), Positives = 36/72 (50%), Gaps = 0/72 (0%)  
Frame = +1

```
Query 41 AGIPGHPGHNGAPGRDGRDGTTPGEKGEKGDPLIGPKGDIGETGVPGAEGPRGFPGIQGR 100
AG G G G G G G G +G KGD G GP G G G GA GP G G QG
Sbjct 56872 AGPQGPKGDRGERGETGLTGNAGPQGPKGDTGAAGPAGPQGPKGETGAAGPVGATGPQGP 57051

Query 101 KGEPGEGAYVYR 112
KG+PGE +R
Sbjct 57052 KGDPGETQIRFR 57087
```

>NC\_009514.1 Phage cdtI DNA, complete genome  
Length=47021

Score = 45.1 bits (105), Expect = 2e-04, Method: Compositional matrix adjust.  
Identities = 33/72 (46%), Positives = 36/72 (50%), Gaps = 0/72 (0%)  
Frame = +1

```
Query 41 AGIPGHPGHNGAPGRDGRDGTTPGEKGEKGDPLIGPKGDIGETGVPGAEGPRGFPGIQGR 100
AG G G G G G G G +G KGD G GP G G G GA GP G G QG
Sbjct 20257 AGPQGPKGDRGERGETGLTGNAGPQGPKGDTGAAGPAGPQGPKGETGAAGPVGATGPQGP 20436

Query 101 KGEPGEGAYVYR 112
KG+PGE +R
Sbjct 20437 KGDPGETQIRFR 20472
```

>NC\_022098.1 Pandoravirus salinus, complete genome  
Length=2473870

Score = 44.7 bits (104), Expect = 3e-04, Method: Compositional matrix adjust.  
Identities = 28/55 (51%), Positives = 34/55 (62%), Gaps = 0/55 (0%)  
Frame = -2

```
Query 48 GHNGAPGRDGRDGTTPGEKGEKGDPLIGPKGDIGETGVPGAEGPRGFPGIQGRKG 102
G G G+DG+DG G +G KG+ G GP+G GE G PGA GP+G G QG G
Sbjct 240984 GPKGPKGKDGKDCDARGPKGEKGDGKPRGAKGEDGCPGARGPKGPKGDQGECC 240820
```

Score = 38.5 bits (88), Expect = 0.028, Method: Compositional matrix adjust.  
Identities = 28/55 (51%), Positives = 33/55 (60%), Gaps = 0/55 (0%)  
Frame = -2

```
Query 48 GHNGAPGRDGRDGTTPGEKGEKGDPLIGPKGDIGETGVPGAEGPRGFPGIQGRKG 102
G G G+DG DG G KGEKGD G GPKG+ G G G +G +G PG G+ G
Sbjct 241272 GPKGKDGKDCDARGPKGEKGDGKPRGPKGEDGCHGPRGPKGEKGAPGPCGKCG 241108
```

Score = 37.7 bits (86), Expect = 0.047, Method: Compositional matrix adjust.  
Identities = 29/59 (49%), Positives = 32/59 (54%), Gaps = 0/59 (0%)  
Frame = -2

```
Query 48 GHNGAPGRDGRDGTTPGEKGEKGDPLIGPKGDIGETGVPGAEGPRGFPGIQGRKGEPGE 106
G G PG G G GEKGEKGD G GP G G G G +G G G +G KGE G+
```

Sbjct 241083 GPKGEPGCHGPRGPKGEKGEKGDGCGKCGPCGPGPKGPKGKDGKDGCDGARGPKGEKGD 240907

Score = 37.0 bits (84), Expect = 0.074, Method: Compositional matrix adjust.  
Identities = 52/208 (25%), Positives = 75/208 (36%), Gaps = 43/208 (21%)  
Frame = -1

Query 59 DGTPGE---KGEKGDPLIGPKGDIGETGVPGAEGPRGFPGIQGRKGEPEGAYVYRSAF 115  
GTPG G++G G +GP G GETG G GP PG+QG +A  
Sbjct 1627075 QGTPGTSGPSGQQGPAGAMGPLGRGETGPSGDAGP---PGVQGPPA-----TAT 1626935

Query 116 SVGLETYVTIPNMPPIR---FTKIFYNQ-----NHYDGSTGKFHCNIPGLYYFAY 162  
+V P P+ + + Q+ ++YD +T F + G+Y F  
Sbjct 1626934 TVAFRAVKNAPQGPLSGGVTVTVAFEQEVFDLADGAAADNYDPATSVFTAPLDGVYRFEV 1626755

Query 163 HITVYM-----KDVKVSFLFKDKA-----MLFTYDQYQENNVDAQSGSVLLHLEVDQV 211  
IT+ +V L A + T + SG L L G V  
Sbjct 1626754 PITLIRFLASSSNVACRLVSDSGAPPIERWLALTTVSSVDLFASTLSGDFL--LAAGQTV 1626581

Query 212 WLQVYGEGERNGLYADNDNDSTFTGFLL 239  
++V L + TFTG L+  
Sbjct 1626580 RVEVTSSAA-GVLISGTSPTPTFTGALV 1626500

Score = 37.0 bits (84), Expect = 0.077, Method: Compositional matrix adjust.  
Identities = 37/84 (44%), Positives = 43/84 (51%), Gaps = 11/84 (13%)  
Frame = -2

Query 32 PKGACTGWMAGIPGHGPHNGAPGRDGRDGTPE---KGEKGDPL-----IGPKGDIGE 82  
PKG C G G G G G +DG+DG GE KG KGD G GPKG G+  
Sbjct 241422 PKGDCG--KCGPCGPRGPRGPKGKDGKDGCDGERGPKGAKGDCGKCGPCGPGPKGKDGK 241249

Query 83 TGVPGAEGPRGFPGIQGRKGEPE 106  
G GA GP+G G +G +G GE  
Sbjct 241248 DGCDGARGPKGEKGDGKGRGPKGE 241177

>NC\_031003.1 Propionibacterium phage Moyashi, complete genome  
Length=29254

Score = 44.7 bits (104), Expect = 3e-04, Method: Compositional matrix adjust.  
Identities = 33/92 (36%), Positives = 45/92 (49%), Gaps = 4/92 (4%)  
Frame = +1

Query 42 GIPGHGPHNGAPGRDGRDGTPEKGEKGDPLIGPKGDIGETGVPGAEGPRGFPGIQGRK 101  
G+ G G +G G DG+DG G GE+GD G GP G G G GP G G G+  
Sbjct 15067 GVSGRAGVDGVNGADGKDRDGSAGERGDVGPSGPAGPQGAQGERGERGPAGVNGSDGKD 15246

Query 102 GEPGEGAYVYRSAF SVGLETYVTIPNMPPIRFT 133  
G+ G RS SV Y + + ++++  
Sbjct 15247 GKDGADGRDGRSVISV----YCSGGRLVVKYS 15330

>NC\_004813.1 Enterobacteria phage BP-4795, complete genome  
Length=57930

Score = 44.7 bits (104), Expect = 3e-04, Method: Compositional matrix adjust.  
Identities = 33/72 (46%), Positives = 36/72 (50%), Gaps = 0/72 (0%)



Frame = +2

```
Query 50      NGAPGRDGRDGTTPGEKGEKGDPLIGPKGDIGETGVPGAEGPRGFPGIQGRKGE 103
           N  G  G  G  G +G KGD G +GP+G  GE G  G  +GP+GF G QG KGE
Sbjct 22283   NEFKGPKGDTGEQGIQGIKGDTPVGPQGYKGEKGDTEQGPQGFVGPQGMKGE 22444
```

>NC\_027626.1 Propionibacterium phage Procrass1, complete genome  
Length=29347

Score = 44.3 bits (103), Expect = 3e-04, Method: Compositional matrix adjust.  
Identities = 35/92 (38%), Positives = 47/92 (51%), Gaps = 13/92 (14%)  
Frame = +3

```
Query 42      GIPGHPGHNGAPGRDGRDGTTPGEKGEKGDPLIGPKGDIGETGVPGAEGPRGFPGIQGRK 101
           G+PG G +G G DGRDG+   GE+GD GL GP G  G  G  GP G  G  G+
Sbjct 15021   GVPGRAGVDGVNGADGRDGS---AGERGDVGLSGPAGPQGAQGERGERGPAGVNGSDGQD 15191
```

```
Query 102     GEPGEGAYVYRSAFSVGLETYVTIPNMPPIRFT 133
           G+ G      RS SV   Y +   + ++++
Sbjct 15192   GKDG-----RSVVSV----YCSEGRLVVKYS 15257
```

Score = 38.1 bits (87), Expect = 0.033, Method: Compositional matrix adjust.  
Identities = 30/66 (45%), Positives = 33/66 (50%), Gaps = 0/66 (0%)  
Frame = +3

```
Query 40      MAGIPGHPGHNGAPGRDGRDGTTPGEKGEKGDPLIGPKGDIGETGVPGAEGPRGFPGIQG 99
           + G+ G  G  GA G DG DG PG  G  G  G  G  GE G  G  GP G  G  QG
Sbjct 14961   LNGVKGPDGLPGANGSDGHDGVPGRAGVDGVNGADGRDGSAGERGDVGLSGPAGPQGAQG 15140
```

```
Query 100     RKGEPG 105
           +GE G
Sbjct 15141   ERGERG 15158
```

>NC\_022340.1 Propionibacterium phage PHL114L00, complete genome  
Length=29464

Score = 44.3 bits (103), Expect = 3e-04, Method: Compositional matrix adjust.  
Identities = 32/67 (48%), Positives = 36/67 (54%), Gaps = 0/67 (0%)  
Frame = +2

```
Query 40      MAGIPGHPGHNGAPGRDGRDGTTPGEKGEKGDPLIGPKGDIGETGVPGAEGPRGFPGIQG 99
           + G+ G  G  GA G DGRDG  G  G  G  G+ G  GD G  G  PGA G  G  G  QG
Sbjct 14954   LNGVNGPDGLPGANGSDGRDGVRLAGADGKDGVKGDLGDTGPAGEPGAPGSAGSAGTQG 15133
```

```
Query 100     RKGEPGE 106
           +GE GE
Sbjct 15134   AQGERGE 15154
```

Score = 43.5 bits (101), Expect = 6e-04, Method: Compositional matrix adjust.  
Identities = 29/61 (48%), Positives = 34/61 (56%), Gaps = 0/61 (0%)  
Frame = +2

```
Query 45      GHPGHNGAPGRDGRDGTTPGEKGEKGDPLIGPKGDIGETGVPGAEGPRGFPGIQGRKGE 104
           G PG NG+ GRDG  G  G  G+ G  G  +G  G  GE G PG+ G  G  G  QG +GE
```

Sbjct 14978 GLPGANGSDGRDGVRLAGADGKDGKVDLGDTPAGEPGAPGSAGSAGTQGAQGERGER 15157  
Query 105 G 105  
G  
Sbjct 15158 G 15160

>NC\_020197.1 Streptococcus phage TP-J34 complete genome  
Length=45606

Score = 44.3 bits (103), Expect = 3e-04, Method: Compositional matrix adjust.  
Identities = 28/55 (51%), Positives = 34/55 (62%), Gaps = 3/55 (5%)  
Frame = +2

Query 57 GRDGTPEKKEKGDPLIGPKGDIGETGVPGAEGPRGFPGIQGRKGEPEGAYVY 111  
G DG G +GE+G G GPKGD GE G+ +GPRG GI G KGE G+ Y +  
Sbjct 34445 GNDGKQGPQGERGLTGPQGPKGDRGERGL---QGPRGDQGIPGPKGEDGKTQYTH 34600

Score = 44.3 bits (103), Expect = 3e-04, Method: Compositional matrix adjust.  
Identities = 28/55 (51%), Positives = 34/55 (62%), Gaps = 3/55 (5%)  
Frame = +2

Query 57 GRDGTPEKKEKGDPLIGPKGDIGETGVPGAEGPRGFPGIQGRKGEPEGAYVY 111  
G DG G +GE+G G GPKGD GE G+ +GPRG GI G KGE G+ Y +  
Sbjct 35357 GNDGKQGPQGERGLTGPQGPKGDRGERGL---QGPRGDQGIPGPKGEDGKTQYTH 35512

Score = 44.3 bits (103), Expect = 3e-04, Method: Compositional matrix adjust.  
Identities = 28/55 (51%), Positives = 34/55 (62%), Gaps = 3/55 (5%)  
Frame = +2

Query 57 GRDGTPEKKEKGDPLIGPKGDIGETGVPGAEGPRGFPGIQGRKGEPEGAYVY 111  
G DG G +GE+G G GPKGD GE G+ +GPRG GI G KGE G+ Y +  
Sbjct 36269 GNDGKQGPQGERGLTGPQGPKGDRGERGL---QGPRGDQGIPGPKGEDGKTQYTH 36424

Score = 44.3 bits (103), Expect = 3e-04, Method: Compositional matrix adjust.  
Identities = 28/55 (51%), Positives = 34/55 (62%), Gaps = 3/55 (5%)  
Frame = +2

Query 57 GRDGTPEKKEKGDPLIGPKGDIGETGVPGAEGPRGFPGIQGRKGEPEGAYVY 111  
G DG G +GE+G G GPKGD GE G+ +GPRG GI G KGE G+ Y +  
Sbjct 37181 GNDGKQGPQGERGLTGPQGPKGDRGERGL---QGPRGDQGIPGPKGEDGKTQYTH 37336

Score = 37.7 bits (86), Expect = 0.051, Method: Compositional matrix adjust.  
Identities = 26/65 (40%), Positives = 33/65 (51%), Gaps = 0/65 (0%)  
Frame = +2

Query 43 IPGHPGHNGAPGRDGRDGTPEKKEKGDPLIGPKGDIGETGVPGAEGPRGFPGIQGRKG 102  
I G+ G G G G G G KG++G+ GL GP+GD G G G +G + I  
Sbjct 34439 IRGNDGKQGPQGERGLTGPQGPKGDRGERGLQGPRGDQGIPGPKGEDGKTQYTHIAYADT 34618

Query 103 EPGEG 107  
E GEG  
Sbjct 34619 ESGEG 34633

Score = 37.7 bits (86), Expect = 0.051, Method: Compositional matrix adjust.  
Identities = 26/65 (40%), Positives = 33/65 (51%), Gaps = 0/65 (0%)  
Frame = +2

Query 43 IPGHPGHNGAPGRDGRDGTTPGEKGEKGDPLIGPKGDIGETGVPGAEGPRGFPGIQGRKG 102  
I G+ G G G G G G KG++G+ GL GP+GD G G G +G + I  
Sbjct 35351 IRGNDGKQGPQGERGLTGPQGPKGDRGERGLQGPRGDQGIPGPKGEDGKTQYTHIAYADT 35530

Query 103 EPGEG 107  
E GEG  
Sbjct 35531 ESGEG 35545

Score = 37.7 bits (86), Expect = 0.051, Method: Compositional matrix adjust.  
Identities = 26/65 (40%), Positives = 33/65 (51%), Gaps = 0/65 (0%)  
Frame = +2

Query 43 IPGHPGHNGAPGRDGRDGTTPGEKGEKGDPLIGPKGDIGETGVPGAEGPRGFPGIQGRKG 102  
I G+ G G G G G G KG++G+ GL GP+GD G G G +G + I  
Sbjct 36263 IRGNDGKQGPQGERGLTGPQGPKGDRGERGLQGPRGDQGIPGPKGEDGKTQYTHIAYADT 36442

Query 103 EPGEG 107  
E GEG  
Sbjct 36443 ESGEG 36457

Score = 37.7 bits (86), Expect = 0.051, Method: Compositional matrix adjust.  
Identities = 26/65 (40%), Positives = 33/65 (51%), Gaps = 0/65 (0%)  
Frame = +2

Query 43 IPGHPGHNGAPGRDGRDGTTPGEKGEKGDPLIGPKGDIGETGVPGAEGPRGFPGIQGRKG 102  
I G+ G G G G G G KG++G+ GL GP+GD G G G +G + I  
Sbjct 37175 IRGNDGKQGPQGERGLTGPQGPKGDRGERGLQGPRGDQGIPGPKGEDGKTQYTHIAYADT 37354

Query 103 EPGEG 107  
E GEG  
Sbjct 37355 ESGEG 37369

>NC\_000871.1 Streptococcus phage Sfil9, complete genome  
Length=37370

Score = 44.3 bits (103), Expect = 4e-04, Method: Compositional matrix adjust.  
Identities = 28/55 (51%), Positives = 34/55 (62%), Gaps = 3/55 (5%)  
Frame = +1

Query 57 GRDGTTPGEKGEKGDPLIGPKGDIGETGVPGAEGPRGFPGIQGRKGEPEGAYVY 111  
G DG G +GE+G G GPKGD GE G+ +GPRG GI G KGE G+ Y +  
Sbjct 18736 GNDGKQGPQGERGLTGPQGPKGDRGERGL---QGPRGDQGIPGPKGEDGKTHYTH 18891

>NC\_024210.1 Escherichia phage e4/1c, complete genome  
Length=47112

Score = 43.9 bits (102), Expect = 4e-04, Method: Compositional matrix adjust.  
Identities = 34/80 (43%), Positives = 40/80 (50%), Gaps = 18/80 (23%)  
Frame = +3



Query 45 GHPGHNGAPGRDGRDGTTPGEKGEKGD---PGLIGP-----KGDIGETGVP 86  
 G G G G G DGTPGEKGE+G G +GP KGD G+ G  
 Sbjct 7428 GEVGPEGPQGPQKDDGTPGEKGERGAVGPPQGTVPQGIQGPQGIQGPAGLKGDKGDRGDT 7607

Query 87 GAEGPRGFPGIQGRKGEPE 106  
 G +GP+G G G KG+PGE  
 Sbjct 7608 GPQGPQGLKGDGTGEKGDPE 7667

Score = 40.8 bits (94), Expect = 0.004, Method: Compositional matrix adjust.  
 Identities = 27/61 (44%), Positives = 35/61 (57%), Gaps = 15/61 (25%)  
 Frame = +3

Query 60 GTPGEKGEKGDPLIGPKGDIGETG-----VPGAEGPRGFPGIQGRKGEPE 104  
 GT G+KGEKGDPE GP+G+ G+TG +PG +GP+G G+QG G  
 Sbjct 7833 GTKGDKGEKGDPEGDTGPQGEKGDTPQGPRIQGGQGIQGLPGDQGPQKGDQGLQGIAGPT 8012

Query 105 G 105  
 G  
 Sbjct 8013 G 8015

Score = 38.5 bits (88), Expect = 0.028, Method: Compositional matrix adjust.  
 Identities = 26/58 (45%), Positives = 32/58 (55%), Gaps = 0/58 (0%)  
 Frame = +3

Query 48 GHNGAPGRDGRDGTTPGEKGEKGDPLIGPKGDIGETGVPGAEGPRGFPGIQGRKGEPE 105  
 G G GRDG G G +G +G+ G GP+G G+ G PG +G RG G QG G G  
 Sbjct 7365 GFQGTSGRDMAGPQGPQGPQGEVGPQGPQKDDGTPGEKGERGAVGPPQGTVPQGPQ 7538

>NC\_017974.1 Cronobacter phage CR3, complete genome  
 Length=149273

Score = 43.9 bits (102), Expect = 5e-04, Method: Compositional matrix adjust.  
 Identities = 27/47 (57%), Positives = 31/47 (66%), Gaps = 0/47 (0%)  
 Frame = +3

Query 57 GRDGTTPGEKGEKGDPLIGPKGDIGETGVPGAEGPRGFPGIQGRKGE 103  
 G G GEKG+KGDPE GP+G GE G PG +GP+G G QG GE  
 Sbjct 11517 GPQGPQGEKGDKGDPEGPQGPQVQGEPEGNPGEKGPQGEQGPQGEAGE 11657

Score = 42.0 bits (97), Expect = 0.002, Method: Compositional matrix adjust.  
 Identities = 31/62 (50%), Positives = 34/62 (55%), Gaps = 0/62 (0%)  
 Frame = +3

Query 45 GHPGHNGAPGRDGRDGTTPGEKGEKGDPLIGPKGDIGETGVPGAEGPRGFPGIQGRKGEPE 104  
 G G G G G G PG GEKG G GP+G+ GE G G +GP G G QG KGE  
 Sbjct 11544 GDKGDPEGPQGPQVQGEPEGNPGEKGPQGEQGPQGEAGEIGPQGPQGPVGPPTGPQGEKGER 11723

Query 105 GE 106  
 GE  
 Sbjct 11724 GE 11729

Score = 41.2 bits (95), Expect = 0.003, Method: Compositional matrix adjust.

Identities = 30/69 (43%), Positives = 38/69 (55%), Gaps = 3/69 (4%)  
Frame = +3

Query 40 MAGIPGHPGHNGAPGRDGRDGTPEKGEKGDPLI---GPKGDIGETGVPGAEGPRGFPG 96  
+ G PG+PG G G G G GE G +G G + GP+G+ GE G PG +GP G G  
Sbjct 11583 VQGEFPGNPGEKGPQGEQGPQGEAGEIGPQGPQGPVGPPTGPQGEKGERGEPGPQGPPEGPAG 11762

Query 97 IQGRKGEPPG 105  
QG +G G  
Sbjct 11763 PQGEQGPAG 11789

Score = 39.3 bits (90), Expect = 0.015, Method: Compositional matrix adjust.  
Identities = 29/64 (45%), Positives = 37/64 (58%), Gaps = 3/64 (5%)  
Frame = +3

Query 42 GIPGHPGHNGAPGRDGRDGTPEKGEKGDPLIGPKGDIGETGVPGAEGPRGFPGIQGRK 101  
G+ G PG+ PG G G G +GE G+ G GP+G +G TG G +G RG PG QG +  
Sbjct 11580 GVQGEFPGN---PGEKGPQGEQGPQGEAGEIGPQGPQGPVGPPTGPQGEKGERGEPGPQGPPE 11750

Query 102 GEPG 105  
G G  
Sbjct 11751 GPAG 11762

Score = 37.7 bits (86), Expect = 0.040, Method: Compositional matrix adjust.  
Identities = 45/185 (24%), Positives = 77/185 (42%), Gaps = 21/185 (11%)  
Frame = +3

Query 41 AGIPGHPGHNGAPGRDGRDGTPEKGEKGDPLIGPKGDIGETGVPGAEGPRGFPGIQGR 100  
AG G G G G G +G G +GEKG+ G GP G G G G +GP PG G  
Sbjct 12093 AGPQGEQGPQGLQGPQQRGIQGVQGEKGEKGDQGPVGPAGPAGPQGEQGP---PGETGP 12263

Query 101 KGEPGEGAY-----VYRSFAFSVGLETYVTIPNMPPIRFTKIFYNQONHYDGSTGKGFHCNIP 155  
KG+ G+ A +Y S + +++ +P + ++ + N+ + F  
Sbjct 12264 KGDKGDNALPTISGIYASPINK-TNSWIQLPGNNLGNVRLILSANNNVSQTRVGFSAAGTS 12440

Query 156 GLYY---FAYHITVYMKDV-KVSLFKKDKAMLFTYDQYQENNVQDASGSVLLHLEVDQV 211  
+ F+Y +T DV ++ + + Y ++ +++ GD+V  
Sbjct 12441 SVAKRIGFSYALTTTYTDVNRIKTGRTGPTSISNTVVYPSDST-----INVGFQDKV 12596

Query 212 WLQVY 216  
L V+  
Sbjct 12597 VLVVF 12611

>NC\_031256.1 Mycobacterium phage Loser, complete genome  
Length=53486

Score = 43.9 bits (102), Expect = 5e-04, Method: Compositional matrix adjust.  
Identities = 34/74 (46%), Positives = 41/74 (55%), Gaps = 9/74 (12%)  
Frame = +3

Query 48 GHNGAPGRDGRDGTPEKGEKGDPLIGPKGDIGETGVPGAEGPRGFPGIQGRKGEPPGEG 107  
G G G +G DG G KG+KGD G +GP+ G+ GA GPRG G QG KG+ G  
Sbjct 4698 GQTGPAGLNGVDGAQGPQKGDQGEQGPQ-----GLTGATGPRGLEGPQGPQKGDQGPL 4859

Query 108 AYVYRSFAFSVGLT 121

Y SA+ V LE  
Sbjct 4860 GY---SAYQVALEA 4892

>NC\_027400.1 Propionibacterium phage PHL055N00, complete genome  
Length=29264

Score = 43.5 bits (101), Expect = 5e-04, Method: Compositional matrix adjust.  
Identities = 33/76 (43%), Positives = 38/76 (50%), Gaps = 6/76 (8%)  
Frame = +3

Query 42 GIPGHPGHNGAPGRDGRDGTPEKEKGEKGDPLIGPKGDIGETGVPGAEGPRGFPGIQGRK 101  
G+PG G +G G DG DG G GE+GD G GP G G G G GP G G G+  
Sbjct 15039 GVPGRAGADGVNVDGADGRDGSAGERGDVGPSPGAPGQGAQGERGERGPAGVNGSDGKD 15218

Query 102 GEPGEGAYVYRSAFSV 117  
G+ G RS SV  
Sbjct 15219 GKDG-----RSVVSV 15248

Score = 38.5 bits (88), Expect = 0.029, Method: Compositional matrix adjust.  
Identities = 29/79 (37%), Positives = 36/79 (46%), Gaps = 0/79 (0%)  
Frame = +3

Query 45 GHPGHNGAPGRDGRDGTPEKEKGEKGDPLIGPKGDIGETGVPGAEGPRGFPGIQGRKGE 104  
G PG GA G +G DG G G G+ G +GP G G G G G RG G+ G G+  
Sbjct 15039 GVPGRAGADGVNVDGADGRDGSAGERGDVGPSPGAPGQGAQGERGERGPAGVNGSDGKD 15218

Query 105 GEGAYVYRSAFSVGLITYV 123  
G+ S + G V  
Sbjct 15219 GKDGRSVSVYCSGGRLVV 15275

Score = 38.1 bits (87), Expect = 0.035, Method: Compositional matrix adjust.  
Identities = 31/67 (46%), Positives = 35/67 (52%), Gaps = 3/67 (4%)  
Frame = +3

Query 40 MAGIPGHPGHNGAPGRDGRDGTPEKEKGEKGDPLIGPKGDIGETGVPGAEGPRGFPGIQG 99  
+AG G PG NG+ DG DG PG G G G+ G G G G G GP G G QG  
Sbjct 14988 VAGSDGLPGANGS---DGHGVPGRAGADGVNVDGADGRDGSAGERGDVGPSPGAPGQ 15158

Query 100 RKGEPGE 106  
+GE GE  
Sbjct 15159 AQGERGE 15179

>NC\_018083.1 Clostridium phage phiCPV4, complete genome  
Length=17972

Score = 43.5 bits (101), Expect = 5e-04, Method: Compositional matrix adjust.  
Identities = 26/55 (47%), Positives = 33/55 (60%), Gaps = 0/55 (0%)  
Frame = -3

Query 63 GEKGEKGDPLIGPKGDIGETGVPGAEGPRGFPGIQGRKGEPEGAYVYRSAFSV 117  
G KGEKGDPG G KG+ G G+PGA+G +G PG G +G PG+ R +  
Sbjct 9129 GAKGEKGDPAKGEQGIQGLPGAQKGEKGDPAQGAQAPGKNGQTPTITMRI 8965

>NC\_017980.1 Clostridium phage phiCP7R, complete genome  
Length=18397

Score = 43.5 bits (101), Expect = 5e-04, Method: Compositional matrix adjust.  
Identities = 26/55 (47%), Positives = 33/55 (60%), Gaps = 0/55 (0%)  
Frame = -3

Query 63 GEKGEKGDPLIGPKGDIGETGVPGAEGPRGFPGIQGRKGEPGEGAYVYRSAFSV 117  
G KGEKGDPG G KG+ G G+PGA+G +G PG G +G PG+ R +  
Sbjct 9413 GAKGEKGDPGAPGAKGEQGIQGLPGAQKGEKGDPGATGAQAGKNGQTPRITMRI 9249

>NC\_021858.1 Pandoravirus dulcis, complete genome  
Length=1908524

Score = 43.5 bits (101), Expect = 6e-04, Method: Compositional matrix adjust.  
Identities = 30/52 (58%), Positives = 32/52 (62%), Gaps = 3/52 (6%)  
Frame = -1

Query 48 GHNGAPGRDGRDGTGPEKGEKGDPLIGPKGDIGETGVPGAEGPRGFPGIQG 99  
G G G+DG DG G KGEKGD G GPK GE G PGA GP+G G QG  
Sbjct 302030 GPKGPKGKDGCDGARGPKGEKGDGKGRGPK---GEDGCPGARGPKGPKGDQG 301884

Score = 41.2 bits (95), Expect = 0.004, Method: Compositional matrix adjust.  
Identities = 35/81 (43%), Positives = 38/81 (47%), Gaps = 1/81 (1%)  
Frame = -1

Query 26 GVLLPLPKGACTGWMAGIPGHNGAPGRDGRDGTGPEKGEKGDPLIGPKGDIGETGV 85  
G P K C G G G G GA G G DG G +G KGD G GP G G G  
Sbjct 302363 GPRGPKGKDGCDGER-GPKGEKGDGARGPKGEDGCGQPRGPKGDKGAPGCGKCGPCGP 302187

Query 86 PGAEGPRGFPGIQGRKGEPGE 106  
G GP+G PG G +G GE  
Sbjct 302186 CGPRGPKGEPGCHGPRGPKGE 302124

Score = 40.8 bits (94), Expect = 0.004, Method: Compositional matrix adjust.  
Identities = 34/71 (48%), Positives = 39/71 (55%), Gaps = 2/71 (3%)  
Frame = -1

Query 32 PKGACTGWMAGIPGHNGAPGRDGRDGTGPEKGEKGDPLIGPKGDIGETGVPGAEGP 91  
PKG C G G G G G+DG DG G KGEKGD G GPKG+ G G G +G  
Sbjct 302405 PKGDCG--KCGPCGPRGPRGPKGKDGCDGERGPKGEKGDGARGPKGEDGCGQPRGPKGD 302232

Query 92 RGFPGIQGRKG 102  
+G PG G+ G  
Sbjct 302231 KGAPGPCGKCG 302199

>NC\_014792.1 Enterobacteria phage vB\_EcoM-VR7, complete genome  
Length=169285

Score = 43.5 bits (101), Expect = 6e-04, Method: Compositional matrix adjust.  
Identities = 29/64 (45%), Positives = 39/64 (61%), Gaps = 0/64 (0%)  
Frame = +2

Query 42 GIPGHNGAPGRDGRDGTGPEKGEKGDPLIGPKGDIGETGVPGAEGPRGFPGIQGRK 101

Sbjct 108077 GI G G G PG +G G G++G +GD GL G +G G G PG +GP+G G++G K  
 GIQGDGTGLQGVPENGAIGPKGDQGIQGDGTGLQGIQGPQGLQGDPTQGPQGIQGLKGDK 108256

Query 102 GEFG 105  
 G+ G

Sbjct 108257 GDQG 108268

Score = 42.4 bits (98), Expect = 0.001, Method: Compositional matrix adjust.  
 Identities = 32/71 (45%), Positives = 40/71 (56%), Gaps = 6/71 (8%)  
 Frame = +2

Query 42 GIPGHPGHNGAPGRDGRDGTPEKEKEKGDPLIGP-----KGDIGETGVPGAEGPRGFP 95  
 GI G G G G G G G KG+KG+ GL GP +G+ GETG PG +G +G

Sbjct 108554 GIQGPQGIQGPKGDGTGETGLQGLKGDKEAGLTGPQGLQGIQGEQGETGAPGIQGIQIA 108733

Query 96 GIQGRKGEPEGE 106  
 G QG KG+ G+

Sbjct 108734 GDQGPKGD TGD 108766

Score = 38.9 bits (89), Expect = 0.017, Method: Compositional matrix adjust.  
 Identities = 34/76 (45%), Positives = 42/76 (55%), Gaps = 15/76 (20%)  
 Frame = +2

Query 42 GIPGHPGHNGAPGRDGRDGTPEKEKEKGDPL-----IGPKGD---IGETGVPGAEG 89  
 G+ G PG NGA G G G G +G +GD GL IGPKGD G+TG+ G +

Sbjct 108005 GLQGVPENGAIGPKGDQGPVGPQGIQGDGTGLQGVPENGAIGPKGDQGIQGDGTGLQGIQ 108184

Query 90 GPRGF---PGIQGRKG 102  
 GP+G PG QG +G

Sbjct 108185 GPQGLQGDPTQGPQG 108232

Score = 38.9 bits (89), Expect = 0.021, Method: Compositional matrix adjust.  
 Identities = 28/63 (44%), Positives = 37/63 (59%), Gaps = 6/63 (10%)  
 Frame = +2

Query 50 NGAPGRDGRDGTPEKEKEKGDPLIGPKGDIGETGVPGAEGPRGFPGI-----QGRKGE 103  
 G GR G +G G +G +G G+ GPKGD GETG+ G +G +G G+ QG +GE

Sbjct 108506 EGPEGRQGVGEAQQGPQGIQGPQGIQGPKGDGTGETGLQGLKGDKEAGLTGPQGLQGIQGE 108685

Query 104 PGE 106  
 GE

Sbjct 108686 QGE 108694

Score = 38.5 bits (88), Expect = 0.023, Method: Compositional matrix adjust.  
 Identities = 32/74 (43%), Positives = 39/74 (53%), Gaps = 3/74 (4%)  
 Frame = +2

Query 40 MAGIPGHPGHNGAPGRDGRDGTPEKEKEKGDPLIGPKGDIGETGVPGAEGPRGFPGIQQ 99  
 + GI G PG NG G G G G +G +GD GL G G+ G G G +GP G GIQQ

Sbjct 107909 LTGIQGEPEGENGDIGPKGDQGPVGPQGIQGDGTGLQGVPENGAIGPKGDQGPVGPQGIQ 108088

Query 100 R---KGEPGEGAYV 110  
 +G PGE +

Sbjct 108089 DTGLQGVPENGAI 108130

Score = 38.5 bits (88), Expect = 0.028, Method: Compositional matrix adjust.  
Identities = 30/79 (38%), Positives = 41/79 (52%), Gaps = 3/79 (4%)  
Frame = +2

Query 42 GIPGHPGHNGAPGRDGRDGTTPGEKGEKGDPLIGPKGD---IGETGVPGAEGPRGFPGIQ 98  
GI G G G G G G PG +G +G GL G KGD GETG G +G +G PG +  
Sbjct 108149 GIQGDGTGLQGIQGPQGLQGDPTQGPQGIQGLKGDQGIQGETGAQGIQGIQGVPGAK 108328

Query 99 GRKGEPEGEGAYVYRSAFSV 117  
G G G ++ ++++  
Sbjct 108329 GDIGPVGPAGLTWKGSWNI 108385

Score = 37.7 bits (86), Expect = 0.042, Method: Compositional matrix adjust.  
Identities = 28/61 (46%), Positives = 33/61 (54%), Gaps = 0/61 (0%)  
Frame = +2

Query 45 GHPGHNGAPGRDGRDGTTPGEKGEKGDPLIGPKGDIGETGVPGAEGPRGFPGIQGRKGE 104  
G G G G G G G KG+ G+ GL G KGD GE G+ G +G +G G QG G P  
Sbjct 108527 GVEGAQGPQGIQGPQGIQGPQGLQGDPTQGPQGIQGLKGDQGEAGLTGPQGLQGIRGEQGETGAP 108706

Query 105 G 105  
G  
Sbjct 108707 G 108709

Score = 37.0 bits (84), Expect = 0.074, Method: Compositional matrix adjust.  
Identities = 32/80 (40%), Positives = 40/80 (50%), Gaps = 15/80 (19%)  
Frame = +2

Query 42 GIPGHPGHNGAPGRDGRDGTTPGE-----KGEKGDPLIGP-----KGDIGETGVP 86  
G+ G PG NGA G G G G+ +G +GDPG GP KGD G+ G+  
Sbjct 108095 GLQGVPENGAIGPKGDQGIQGDGTGLQGIQGPQGLQGDPTQGPQGIQGLKGDQGIQ 108274

Query 87 GAEGPRGFPGIQGRKGEPE 106  
G G +G GIQG G G+  
Sbjct 108275 GETGAQGIQGIQGVPGAKGD 108334

>NC\_033423.1 Lymphocystis disease virus Sa isolate SA9, complete genome  
Length=208501

Score = 43.5 bits (101), Expect = 6e-04, Method: Compositional matrix adjust.  
Identities = 27/50 (54%), Positives = 31/50 (62%), Gaps = 0/50 (0%)  
Frame = +3

Query 41 AGIPGHPGHNGAPGRDGRDGTTPGEKGEKGDPLIGPKGDIGETGVPGAEG 90  
+G PG PG G PG DG G PGEKG G G GPKG++G G PG +G  
Sbjct 136002 SGEFPGQPIEGPPGNDGLPGLPGEKGSPPMHGTPGPKGELGARGTPGPKG 136151

Score = 40.0 bits (92), Expect = 0.009, Method: Compositional matrix adjust.  
Identities = 35/75 (47%), Positives = 37/75 (49%), Gaps = 12/75 (16%)  
Frame = +3

Query 43 IPGHPGHNGAPGRDGRDGTTPG-----EKGEKGDPLIGPKGDIGETGVPGAEGPR- 92

I G+PG G PG G+ GT G G KGD G GP G GE G PG EGP  
 Sbjct 135864 INGNPGRSRGHPGSRGKTGTAGPIGLPGLTGSPTKGDGRKCGPAGPSGEPGQPGIEGPPG 136043  
 Query 93 --GFPGIQGRKGEFG 105  
 G PG G KG PG  
 Sbjct 136044 NDGLPGPPGEGKGSFG 136088

Score = 39.7 bits (91), Expect = 0.010, Method: Compositional matrix adjust.  
 Identities = 27/68 (40%), Positives = 37/68 (54%), Gaps = 0/68 (0%)  
 Frame = -2

Query 35 ACTGWMAGIPGHHPGHNGAPGRDGRDGTTPGEKGEKGDPLIGPKGDIGETGVPGAEGPRGF 94  
 +C G+ G G G G G G G KG+KG PG+ G G++GE G G +G +GF  
 Sbjct 151761 SCISNEMGVTGDKGEVGIKSGKERGHRGNKGDKGLPGVRGFTGEVGEPEGKKGEQKQKGF 151582  
 Query 95 PGIQGRKG 102  
 G +G +G  
 Sbjct 151581 SGSKGDQG 151558

Score = 37.4 bits (85), Expect = 0.061, Method: Compositional matrix adjust.  
 Identities = 34/73 (47%), Positives = 38/73 (52%), Gaps = 6/73 (8%)  
 Frame = +3

Query 36 CTGWMAGIPGHHPGHNGAPGRDGRDGTTPGEKGEK-----GDPGLIGPKGDIGETGVPGAEG 90  
 C G I GHPG G G G+ G PG KGEK G PG G G GE G G G  
 Sbjct 135561 CKGDQGDIGHPGVQGPQPPGQGTGKPLKGEKGRSCIGKPKGDQPGHPGEPGRDGHSG 135737  
 Query 91 PRGFPGIQGRKGE 103  
 RG PG++G +GE  
 Sbjct 135738 QRGIPGMKGDGRGE 135776

Score = 36.6 bits (83), Expect = 0.097, Method: Compositional matrix adjust.  
 Identities = 32/83 (39%), Positives = 39/83 (47%), Gaps = 18/83 (22%)  
 Frame = -2

Query 42 GIPGHHPGHNGAPGRDGRDGT-----PGEKGEKGDPLIGPKGDIGET 83  
 G GHPG GA G G G G KG GD G+ G KG+ GE+  
 Sbjct 151524 GDTGHPGFKGAQGEQGPQGGKGNKGDKGVSLRGYKGLKGYSGDNGITGRKGEKGES 151345  
 Query 84 GVPGAEGPRGFPGIQGRKGEFGE 106  
 G+PG +G +G PG+ G G GE  
 Sbjct 151344 GLPGFQGEKGDGPGVDGVTGGKGE 151276

>NC\_022335.1 Propionibacterium phage PHL067M10, complete genome  
 Length=29377

Score = 43.5 bits (101), Expect = 7e-04, Method: Compositional matrix adjust.  
 Identities = 35/79 (44%), Positives = 39/79 (49%), Gaps = 9/79 (11%)  
 Frame = +1

Query 42 GIPGHHPGH---NGAPGRDGRDGTTPGEKGEKGDPLIGPKGDIGETGVPGAEGPRGFPGIQ 98  
 G+PG G NG G DGRDG G GE+GD G GP G G G GP G G  
 Sbjct 14998 GVPGRAGVDGVNVDGADGRDGVNDSAGERGDVPSGPAGPQAQGERGERGPAGANGSD 15177

Query 99 GRKGEPGEGAYVYRSAFSV 117  
G+ G+ G RS SV  
Sbjct 15178 GKDGKDG-----RSVVSV 15216

Score = 39.7 bits (91), Expect = 0.010, Method: Compositional matrix adjust.  
Identities = 28/63 (44%), Positives = 36/63 (57%), Gaps = 0/63 (0%)  
Frame = +1

Query 41 AGIPGHPGHNGAPGRDGRDGTPEKEKGEKDPGLIGPKGDIGETGVPGAEGPRGFPGIQGR 100  
AG+ G G +GA GRDG +G+ GE+G+ G G GP+G GE G G G G G G+  
Sbjct 15013 AGVDGVNGVDGADGRDGVNGSAGERGDVGPSPGAPGQGAQGERGERGPAGANGSDGKDGK 15192

Query 101 KGE 103  
G  
Sbjct 15193 DGR 15201

>NC\_028967.1 Propionibacterium phage PAC1, complete genome  
Length=29605

Score = 43.1 bits (100), Expect = 7e-04, Method: Compositional matrix adjust.  
Identities = 30/82 (37%), Positives = 40/82 (49%), Gaps = 6/82 (7%)  
Frame = +2

Query 42 GIPGHPGHNGAPGRDGRDGTPEKEKGEKDPGLIGPKGDIGETGVPGAEGPRGFPGIQGRK 101  
G+PG G +G G DGRDG+ GE+ G +GP G G G G G RG G+ G  
Sbjct 15140 GVPGRAGADGVNGADGRDGSAGER-----GYVGPSPGAPGQGAQGERGERGPAGVNGSD 15301

Query 102 GEPGEGAYVYRSAFSVGLETYV 123  
G+ G+ S + G +V  
Sbjct 15302 GKDGKDGRSVVSVCSSGRLV 15367

Score = 38.1 bits (87), Expect = 0.038, Method: Compositional matrix adjust.  
Identities = 30/66 (45%), Positives = 33/66 (50%), Gaps = 0/66 (0%)  
Frame = +2

Query 40 MAGIPGHPGHNGAPGRDGRDGTPEKEKGEKDPGLIGPKGDIGETGVPGAEGPRGFPGIQG 99  
+ G+ G G GA G DG DG PG G G G G G GE G G GP G G QG  
Sbjct 15080 LNGVKGPDLPGANGLDGHGVPGRAGADGVNGADGRDGSAGERGYVGPSPGAPGQGAQG 15259

Query 100 RKGEPG 105  
+GE G  
Sbjct 15260 ERGERG 15277

Score = 37.4 bits (85), Expect = 0.059, Method: Compositional matrix adjust.  
Identities = 35/82 (43%), Positives = 38/82 (46%), Gaps = 12/82 (15%)  
Frame = +2

Query 41 AGIPGHPGHNGAPGRDGRDGT-----PGEKGEKDPGLIGPKGDIGETGVPGA 88  
AG+ G G GA GRDG +G+ PG G KG GL G G G GVPG  
Sbjct 14975 AGVRGPQGPAGADGRDGVNGSAGLVGVPVGPQGSPLNGVKGPDLPGANGLDGHGVPGR 15154

Query 89 EGPRGFPGIQGRKGEPEGAYV 110  
G G G GR G GE YV  
Sbjct 15155 AGADGVNGADGRDGSAGERGYV 15220



>NC\_031922.1 Synechococcus phage S-CAM9 isolate 1109NB16, complete genome  
Length=174830

Score = 43.1 bits (100), Expect = 7e-04, Method: Compositional matrix adjust.  
Identities = 24/50 (48%), Positives = 31/50 (62%), Gaps = 0/50 (0%)  
Frame = +2

Query 57 GRDGTPGEKGEKGDPLIGPKGDIGETGVPGAEGPRGFPGIQGRKGEPGE 106  
G G GEKG+KG+ G G KGD G+ G G GP+G G G+KG+ G+  
Sbjct 31559 GEKGQKGEKGQKGEIGQKQKGDGKQKGEIGQKQKQKQ 31708

Score = 42.0 bits (97), Expect = 0.002, Method: Compositional matrix adjust.  
Identities = 23/51 (45%), Positives = 28/51 (55%), Gaps = 0/51 (0%)  
Frame = +2

Query 42 GIPGHPGHNGAPGRDGRDGTPEKGEKGDPLIGPKGDIGETGVPGAEGPR 92  
G G G G G G+ G G+KG+KG+ G GPKG GE G G +G R  
Sbjct 31559 GEKGQKGEKGQKGEIGQKQKGDGKQKGEIGQKQKQKQ 31711

Score = 37.4 bits (85), Expect = 0.056, Method: Compositional matrix adjust.  
Identities = 23/53 (43%), Positives = 30/53 (57%), Gaps = 0/53 (0%)  
Frame = +2

Query 51 GAPGRDGRDGTPEKGEKGDPLIGPKGDIGETGVPGAEGPRGFPGIQGRKGE 103  
G G G+ G G+KGE G G G KG GE G G +G +G G +G+KG+  
Sbjct 31550 GPKGEKGQKGEKGQKGEIGQKQKGDGKQKGEIGQKQKQ 31708

>NC\_027367.1 Propionibacterium phage PHL132N00, complete genome  
Length=29003

Score = 43.1 bits (100), Expect = 7e-04, Method: Compositional matrix adjust.  
Identities = 33/76 (43%), Positives = 41/76 (54%), Gaps = 9/76 (12%)  
Frame = +2

Query 42 GIPGHPGHNGAPGRDGRDGTPEKGEKGDPLIGPKGDIGETGVPGAEGPRGFPGIQGRK 101  
G+PG G +G G DGRDG+ GE+G+ G G GP+G GE G GP G G G+  
Sbjct 14999 GVPGRAGADGVNVDGRDGSAGERGVDVPSGPAGPQQAQGER---GERGPAGANGSDGKD 15169

Query 102 GEPGEGAYVYRSAFSV 117  
G+ G RS SV  
Sbjct 15170 GKDG-----RSVVSV 15199

Score = 40.4 bits (93), Expect = 0.005, Method: Compositional matrix adjust.  
Identities = 35/81 (43%), Positives = 43/81 (53%), Gaps = 3/81 (4%)  
Frame = +2

Query 26 GVLLPL-PKGA CTGWMAGIPGHPGHNGAPGRDGRDGTPEKGEKGDPLIGPKGDIGETG 84  
GV+ P+ P+G+ + G+ G G G DGRDG PG G G G+ G G GE G  
Sbjct 14900 GVVGPVGPQGSP--GLNGVKPDLPGVNGSDGRDGVPRAGADGVNVDGRDGSAGERG 15073

Query 85 VPGAEGPRGFPGIQGRKGEPG 105  
G GP G G QG +GE G

Sbjct 15074 DVGPSGPAGPQGAQGERGERG 15136

>NC\_018846.1 Escherichia phage P13374, complete genome  
Length=60894

Score = 43.1 bits (100), Expect = 8e-04, Method: Compositional matrix adjust.  
Identities = 31/64 (48%), Positives = 35/64 (55%), Gaps = 0/64 (0%)  
Frame = +1

Query 42 GIPGHPGHNGAPGRDGRDGTPEKEKGEKGDPLIGPKGDIGETGVPGAEGPRGFPGIQGRK 101  
G+PG G G G G G G +G KGDGP GPKGD G G G +G G G QG K  
Sbjct 42064 GVPGPKGDKGDSGPAGPAGPRGVQGPKGDPGPOGPKGDTGAAGAKGEKGGATGATGPQGP 42243

Query 102 GEPG 105  
G+ G  
Sbjct 42244 GDTG 42255

Score = 38.9 bits (89), Expect = 0.018, Method: Compositional matrix adjust.  
Identities = 27/61 (44%), Positives = 33/61 (54%), Gaps = 0/61 (0%)  
Frame = +1

Query 45 GHPGHNGAPGRDGRDGTPEKEKGEKGDPLIGPKGDIGETGVPGAEGPRGFPGIQGRKGE 104  
G G G G G G GE+G+ G G +GP G GE G G GP+G PG++G GE  
Sbjct 41473 GPKGETGPVGPQGPAGPKGERGDVGAQGA VGPAGPRGEKGEQGERGPQGIPLKGDGTGER 41652

Query 105 G 105  
G  
Sbjct 41653 G 41655

>NC\_031065.1 Salmonella phage vB\_SnwM\_CGG4-1, complete genome  
Length=159878

Score = 43.1 bits (100), Expect = 8e-04, Method: Compositional matrix adjust.  
Identities = 39/102 (38%), Positives = 46/102 (45%), Gaps = 21/102 (21%)  
Frame = +1

Query 41 AGIPGHPGHNGAPGRDGRDGTPEKEKGEKGDPL-----IGPKGDIGE- 82  
AG G PG G G G G PG GE G GL IGPKGD G+  
Sbjct 98305 AGPKGDGPGPQGLQGIQGPKGDPGADGEPGPQGLQGPAGPQGPPIGPGGEGSIGPKGDKGDP 98484

Query 83 --TGVPGAEGPRGFPGIQGRKGEPEGAYVYRSAFSVGLETY 122  
G+ G +GP G PGIQG G G V+R ++ +E Y  
Sbjct 98485 GPQGLQGIQGPAGEPGIQQGPIGPIGPAGLVWRGQWN-SIENY 98607

Score = 41.6 bits (96), Expect = 0.003, Method: Compositional matrix adjust.  
Identities = 42/136 (31%), Positives = 59/136 (43%), Gaps = 14/136 (10%)  
Frame = +1

Query 45 GHPGHNGAPGRDGRDGTPEKEKGEKGDPLIGPKGDIGETGVPGAEGPRGFPGIQ---GRK 101  
G G G G G+ G G G KGD G+ GP+G GE G+ G +GP G G Q G K  
Sbjct 98974 GEEGPQGIQGPQTGQRGATGPAGPKGDTGIAGPQGVQGERGIQGIQGPAGPTGAQGPVGP 99153

Query 102 GEPGEA-YVYRSAFSVGLETYVT--IPNMPIRFTKIFYNQQNHYDGSTGK-----F 150  
G+ GE A + S L+T + P R+ + YD + K F

Sbjct 99154 GDKGEDAVFDVESLTQSQLQTLYNKLLAFHPTRYWRDSVKFFFPYDTTVEKILPLWAFNF 99333  
Query 151 HCNIPGLYYFAYHITV 166  
+ + Y+++ I V  
Sbjct 99334 KLHFKMISYYSFEIRV 99381

>NC\_014260.1 Enterobacteria phage IME08, complete genome  
Length=172253

Score = 43.1 bits (100), Expect = 8e-04, Method: Compositional matrix adjust.  
Identities = 31/65 (48%), Positives = 36/65 (55%), Gaps = 0/65 (0%)  
Frame = +1

Query 41 AGIPGHPGHNGAPGRDGRDGTPEKGEKGDPLIGPKGDIGETGVPGAEGPRGFPGIQR 100  
+G G G G G G G G KG+KGD GL GP G IG G G +G RG GIQG  
Sbjct 108829 SGAQGLQGPKGDKGDTGLQGIQGPKGDKGDTGLQGPIGPIGPKGDQGPQGSRGIQGIQGP 109008

Query 101 KGEPG 105  
+G+ G  
Sbjct 109009 QGDQG 109023

Score = 39.7 bits (91), Expect = 0.011, Method: Compositional matrix adjust.  
Identities = 30/60 (50%), Positives = 34/60 (57%), Gaps = 3/60 (5%)  
Frame = +1

Query 49 HNGAPGRDGRDGTPEKGEKGDPLIG---PKGDIGETGVPGAEGPRGFPGIQRKGEPG 105  
GA G G G G KG+KGD GL G PKGD G+TG+ G GP G G QG +G G  
Sbjct 108808 SQGARGESGAQGLQGPKGDKGDTGLQGIQGPKGDKGDTGLQGPIGPIGPKGDQGPQGSRG 108987

>NC\_008464.1 Stx2-converting phage 86, complete genome  
Length=60238

Score = 43.1 bits (100), Expect = 8e-04, Method: Compositional matrix adjust.  
Identities = 51/185 (28%), Positives = 75/185 (41%), Gaps = 19/185 (10%)  
Frame = +1

Query 48 GHNGAPGRDGRDGTPEKGEKGDPLIGPKGDIGE-----TGVPGAEGPRGFPGIQRK 101  
G G PG G G G KG++G+PG GP+G GE GV G GP G PG +G K  
Sbjct 18607 GPAGEPGPRGEPGPQGLKGRGEPGPPTGPQGPAGERGPQGPVAGPVPAGEPGAAGDK 18786

Query 102 GEPGEGAYVYRSASFVGLETYVTIPNMPPIRFTKIFYNQQNHYDGSTGKFHCNIPGLYYFA 161  
G+PG G + SA + + ++ + F + Q D + I  
Sbjct 18787 GDPG-GTELLASANTW-TQPQTINGDLTVTGNFSFNDVQIRSDKRNKRNAIRIDNCLEKL 18960

Query 162 YHITVYMKDVK-----VSLFKKDKAMLFTYDQYQENNVDQASGSVLLHLEVDQVW 212  
+T Y+ +++ V LF +D L + ++ D SG L +  
Sbjct 18961 DLLTGLYEIQNADGSWQQSVGLFAQD--ALKAQPELVTSDTDIISGEERFRLNYNGVIA 19134

Query 213 LQVYG 217  
L V G  
Sbjct 19135 LLVEG 19149

Score = 37.4 bits (85), Expect = 0.062, Method: Compositional matrix adjust.  
Identities = 29/62 (47%), Positives = 31/62 (50%), Gaps = 0/62 (0%)

Frame = +1

```
Query 41 AGIPGHPGHNGAPGRDGRDGTTPGEKGEKGDPLIGPKGDIGETGVPGAEGPRGFPGIQGR 100
AG G G G G G G GE GE+G G+ GP G G TG G G RG GIQG
Sbjct 17962 AGPRGEKGEQGERGPQGLQGLKGETGERGPQGVQGPAGPTGATGPAGPRGERGEQGIQGP 18141

Query 101 KG 102
G
Sbjct 18142 AG 18147
```

>NC\_027389.1 Propionibacterium phage PHL141N00, complete genome  
Length=29494

Score = 43.1 bits (100), Expect = 8e-04, Method: Compositional matrix adjust.  
Identities = 34/92 (37%), Positives = 45/92 (49%), Gaps = 10/92 (11%)  
Frame = +1

```
Query 42 GIPGHPGHNGAPGRDGRDGTTPGEKGEKGDPLIGPKGDIGETGVPGAEGPRGFPGIQGRK 101
G+PG G +G G DG DG G GE+GD G GP G G G G GP G G G+
Sbjct 15019 GVPGRAGADGVNVDGADGRDGSAGERGDVGPSPGAPQGAQGERGERGPAGANGSDGKD 15198

Query 102 GEPGEGAYVYRSAFSVGLETYVTIPNMPPIRFT 133
G+ G RS SV Y + + ++++
Sbjct 15199 GKDG-----RSVVSV----YCS DGRLLVVKYS 15264
```

>NC\_022968.1 Enterobacteria phage 4MG, complete genome  
Length=148567

Score = 43.1 bits (100), Expect = 8e-04, Method: Compositional matrix adjust.  
Identities = 32/92 (35%), Positives = 45/92 (49%), Gaps = 8/92 (9%)  
Frame = -1

```
Query 45 GHPGHNGAPGRDGRDGTTPGEKGEKGDPLIGPKGDIGETGVPGAEGPRGFPGIQGRKGE 104
G G G G G G G G +G G +GPKGD G+TG+ G GP+G G +G +GE
Sbjct 49852 GQKGDQGPPTGPTGPQGPQNDGAQGIQGPVGPKGDKGDTGLTGPVGPQGPVGPKGDRGET 49673

Query 105 G-----EGAYVYRSAFSVGLETYVTIPNM 128
G +GA A + ++ +PN+
Sbjct 49672 GYSARVLGTKGATSELPATGTSGDAWIIIVPNL 49577
```

>NC\_018839.1 Propionibacterium phage P14.4, complete genome  
Length=29729

Score = 43.1 bits (100), Expect = 9e-04, Method: Compositional matrix adjust.  
Identities = 28/60 (47%), Positives = 34/60 (57%), Gaps = 0/60 (0%)  
Frame = +3

```
Query 42 GIPGHPGHNGAPGRDGRDGTTPGEKGEKGDPLIGPKGDIGETGVPGAEGPRGFPGIQGRK 101
G+PG G +G G DGRDG+ GE+G+ G G GP+G GE G G G G G GR
Sbjct 15024 GVPGRVVDGVNADGRDGSAGERGDVGPSPGAPQGAQGERGERGPAGADGSDGKDGRS 15203
```

>NC\_027333.1 Propionibacterium phage PHL070N00, complete genome  
Length=29421

Score = 43.1 bits (100), Expect = 9e-04, Method: Compositional matrix adjust.  
Identities = 34/76 (45%), Positives = 42/76 (55%), Gaps = 3/76 (4%)  
Frame = +2

Query 42 GIPGHPGHNGAPGRDGRDGTPEKGEKGDPLIGPKGDIGETGVPGAEGPRGFPGIQGRK 101  
G+PG G +G G DGRDG+ GE G+ G G GP+G GE G G GP+G G G  
Sbjct 15017 GVPGRAGVDGVNGVDGRDGSAGELGDVGPAGPAGPQQAQGERGERGPIGPQGPAGADGTN 15196

Query 102 GEPGEGAYVYRSAFSV 117  
G+ G+ RS SV  
Sbjct 15197 GKDGKDG---RSVVSV 15235

Score = 37.0 bits (84), Expect = 0.090, Method: Compositional matrix adjust.  
Identities = 33/78 (42%), Positives = 37/78 (47%), Gaps = 12/78 (15%)  
Frame = +2

Query 41 AGIPGHPGHNGAPGRDGRD-----GTPGEKGEKGDPLIGPKGDIGETGVPGA 88  
AG+ G G GA GRDG + G+PG G KG GL G G G GVPG  
Sbjct 14852 AGVRGPQGPAGADGRDGVNGSAGLVGVPVGPQGSPLNGVKGPDGLPGANGSDGHDGVPGR 15031

Query 89 EGPRGFPGIQGRKGEPE 106  
G G G+ GR G GE  
Sbjct 15032 AGVDGVNGVDGRDGSAGE 15085

>NC\_023716.1 Mycobacterium phage Alma, complete genome  
Length=53177

Score = 43.1 bits (100), Expect = 9e-04, Method: Compositional matrix adjust.  
Identities = 28/58 (48%), Positives = 34/58 (59%), Gaps = 0/58 (0%)  
Frame = +2

Query 45 GHPGHNGAPGRDGRDGTPEKGEKGDPLIGPKGDIGETGVPGAEGPRGFPGIQGRKG 102  
G PG GA G G G PG G +G+PG GP+G G+TG G +GP+G G QG G  
Sbjct 4871 GDPGTAGATGLTGSAGAPGAPGPQGEPEPPTGPQGPKGDTGATGPQGPKGDTGAQGPAG 5044

Score = 42.0 bits (97), Expect = 0.002, Method: Compositional matrix adjust.  
Identities = 37/96 (39%), Positives = 44/96 (46%), Gaps = 12/96 (13%)  
Frame = +2

Query 41 AGIPGHPGHNGAPGRDGRDGTPE-----KGEKGDPLIGPKGDIGETGVPGAEGPRGF 94  
AG PG PG G PG G G G+ +G KGD G GP G G G GA+GP G  
Sbjct 4913 AGAPGAPGPQGEPEPPTGPQGPKGDTGATGPQGPKGDTGAQGPAGATGPKGDTGAQGPPTGA 5092

Query 95 PGIQGRKGEPEGEG-----AYVYRSAFSVGLETYVT 124  
G QG G P V ++A+ G +T T  
Sbjct 5093 TGAQGPSGTPSSTNTVLDVFKVTQAAYDAGPKTATT 5200

Score = 39.7 bits (91), Expect = 0.010, Method: Compositional matrix adjust.  
Identities = 28/59 (47%), Positives = 33/59 (56%), Gaps = 0/59 (0%)  
Frame = +2

Query 48 GHNGAPGRDGRDGTPEKGEKGDPLIGPKGDIGETGVPGAEGPRGFPGIQGRKGEPE 106  
G G G G G G+KG+KGDPG G G G G PGA GP+G PG G +G G+  
Sbjct 4808 GEKGDKGLDLPQGPKGDKGDKDPGTAGATGLTGSAGAPGAPGPQGEPEPPTGPQGPKG 4984

Score = 39.7 bits (91), Expect = 0.011, Method: Compositional matrix adjust.  
Identities = 34/70 (49%), Positives = 37/70 (53%), Gaps = 6/70 (9%)  
Frame = +2

Query 42 GIPGHPGHNGAPGRDGRDGTTPGEKGEKGDPLIGPKGDIGETGVPGAEGPRGF-----P 95  
GI G G G G G G GEKG+KGD G GPKGD G+ G PG G G P  
Sbjct 4745 GIQGATGPQGLQGPKGQGIQGEKGDKGLDLPQGPKGDKGDKGDPGTAGATGLTGSAGAP 4924

Query 96 GIQGRKGEPEG 105  
G G +GEPEG  
Sbjct 4925 GAPGPQGEPEG 4954

Score = 39.3 bits (90), Expect = 0.013, Method: Compositional matrix adjust.  
Identities = 30/62 (48%), Positives = 35/62 (56%), Gaps = 0/62 (0%)  
Frame = +2

Query 45 GHPGHNGAPGRDGRDGTTPGEKGEKGDPLIGPKGDIGETGVPGAEGPRGFPGIQRKGEPEG 104  
G PG G G G G G G KGD G GP+G G TG G +GP+G GIQG KG+  
Sbjct 4646 GDPGDTGPTGATGPAGPQGATGPKGDTGAQGPQGIQATGPQGLQGPKGQGIQGEKGDK 4825

Query 105 GE 106  
G+  
Sbjct 4826 GD 4831

>NC\_027370.1 Propionibacterium phage PHL179M00, complete genome  
Length=29428

Score = 42.7 bits (99), Expect = 0.001, Method: Compositional matrix adjust.  
Identities = 32/76 (42%), Positives = 40/76 (53%), Gaps = 9/76 (12%)  
Frame = +2

Query 42 GIPGHPGHNGAPGRDGRDGTTPGEKGEKGDPLIGPKGDIGETGVPGAEGPRGFPGIQRK 101  
G+PG G +G G DGRDG+ GE+G+ +GP G G GV G G RG G+ G  
Sbjct 15032 GVPGRAGADGVNVDGRDGSAGERGD-----VGPSGPAGPQGVRRGERGERGPAGVNGSD 15193

Query 102 GEPGEGAYVYRSAFSV 117  
G G+ RS SV  
Sbjct 15194 GHDGKDG---RSVVSV 15232

Score = 39.7 bits (91), Expect = 0.011, Method: Compositional matrix adjust.  
Identities = 29/66 (44%), Positives = 36/66 (55%), Gaps = 0/66 (0%)  
Frame = +2

Query 40 MAGIPGHPGHNGAPGRDGRDGTTPGEKGEKGDPLIGPKGDIGETGVPGAEGPRGFPGIQQ 99  
+ G+ G G GA G DGR+G PG G G G+ G G GE G G GP G G++G  
Sbjct 14972 LNGVKGPDLPGANGLDGRNVPGRAGADGVNVDGRDGSAGERGDVGPSPAGPQGVRR 15151

Query 100 RKGEPEG 105  
+GE G  
Sbjct 15152 ERGERG 15169

Score = 37.0 bits (84), Expect = 0.072, Method: Compositional matrix adjust.

Identities = 31/73 (42%), Positives = 37/73 (51%), Gaps = 12/73 (16%)  
Frame = +2

Query 40 MAGIPGHPG---HNGAPGRDGRDGTPEKEKGDPLIGPKGDIGETGVPGAEGPRGFPG 96  
+AG+PG G G G DGRDG G GL+GP G G G+ G +GP G PG  
Sbjct 14846 VAGVPGPAGVRGPQGPAGVDGRDGV-----NGSAGLVGPVGPQGSPLNGVKGPDGLPG 15007

Query 97 ---IQGRKGEPE 106  
+ GR G PG  
Sbjct 15008 ANGLDGRNGVPGR 15046

>NC\_028685.1 Shigella phage Ss-VASD, complete genome  
Length=62851

Score = 42.7 bits (99), Expect = 0.001, Method: Compositional matrix adjust.  
Identities = 31/64 (48%), Positives = 35/64 (55%), Gaps = 0/64 (0%)  
Frame = +1

Query 42 GIPGHPGHNGAPGRDGRDGTPEKEKGDPLIGPKGDIGETGVPGAEGPRGFPGIQGRK 101  
G+PG G G G G G +G KDPG GPKGD G G G +G G G QG K  
Sbjct 43981 GVPGPKGDKGDSGPAGPAGPRGVQGPKGDPGPQGPKGDTGAAGAKGEKGATGATGPQGPK 44160

Query 102 GEPG 105  
G+ G  
Sbjct 44161 GDTG 44172

Score = 38.5 bits (88), Expect = 0.023, Method: Compositional matrix adjust.  
Identities = 27/61 (44%), Positives = 33/61 (54%), Gaps = 0/61 (0%)  
Frame = +1

Query 45 GHPGHNGAPGRDGRDGTPEKEKGDPLIGPKGDIGETGVPGAEGPRGFPGIQGRKGEPE 104  
G G G G G G GE+G+ G G +GP G GE G G GP+G PG++G GE  
Sbjct 43390 GPKGETGPVGPQGPAGPKGERGDVGAQGA VGPAGPRGEKGEQGERGPGQIPGLKGDGTGER 43569

Query 105 G 105  
G  
Sbjct 43570 G 43572

Score = 37.4 bits (85), Expect = 0.062, Method: Compositional matrix adjust.  
Identities = 27/58 (47%), Positives = 29/58 (50%), Gaps = 0/58 (0%)  
Frame = +1

Query 45 GHPGHNGAPGRDGRDGTPEKEKGDPLIGPKGDIGETGVPGAEGPRGFPGIQGRK 102  
G PG G G G GEKG G G GPKGD G G G +GP+G G G G  
Sbjct 44062 GDPGPQGPKGDTGAAGAKGEKGATGATGPQGPKGDTGAVGPAGPQGPKGDTGAAGPAG 44235

>NC\_027354.1 Propionibacterium phage PHL301M00, complete genome  
Length=29323

Score = 42.7 bits (99), Expect = 0.001, Method: Compositional matrix adjust.  
Identities = 33/76 (43%), Positives = 38/76 (50%), Gaps = 6/76 (8%)  
Frame = +2

Query 42 GIPGHPGHNGAPGRDGRDGTPEKEKGDPLIGPKGDIGETGVPGAEGPRGFPGIQGRK 101

Sbjct 15002 G+PG G +G G DG DG G GE+GD G GP G G G GP G G G+ 15181  
 GVPGRAGADGVNGVDGADGRDGSAGERGDVGPSPGAPGQGAQGERGERGPAGANGSDGKD  
 Query 102 GEPGEGAYVYRSAFSV 117  
 G+ G RS SV  
 Sbjct 15182 GKDG-----RSVVSV 15211

Score = 38.1 bits (87), Expect = 0.036, Method: Compositional matrix adjust.  
 Identities = 30/67 (45%), Positives = 34/67 (51%), Gaps = 0/67 (0%)  
 Frame = +2

Query 40 MAGIPGHPGHNGAPGRDGRDGTPEKEKGEKGDPLIGPKGDIGETGVPGAEGPRGFPGIQG 99  
 + G+ G G G DGRDG PG G G G+ G G G G GP G G QG  
 Sbjct 14942 LNGVKGPDPGLPGVNGSDGRDGVPRAGADGVNGVDGADGRDGSAGERGDVGPSPGAPGQG 15121  
 Query 100 RKGEPGE 106  
 +GE GE  
 Sbjct 15122 AQGERGE 15142

Score = 37.4 bits (85), Expect = 0.054, Method: Compositional matrix adjust.  
 Identities = 29/69 (42%), Positives = 35/69 (51%), Gaps = 9/69 (13%)  
 Frame = +2

Query 40 MAGIPGHPG---HNGAPGRDGRDGTPEKEKGEKGDPLIGPKGDIGETGVPGAEGPRGFPG 96  
 +AG+PG G G DGRDG G GL+GP G G G+ G +GP G PG  
 Sbjct 14816 VAGVPGPAGVRGPQGPAGVDGRDGV-----NGSAGLVGPVGPQGSPLNGVKGPDPGLPG 14977  
 Query 97 IQGRKGEPE 105  
 + G G G  
 Sbjct 14978 VNGSDGRDG 15004

>NC\_031005.1 Propionibacterium phage QueenBey, complete genome  
 Length=29338

Score = 42.7 bits (99), Expect = 0.001, Method: Compositional matrix adjust.  
 Identities = 32/76 (42%), Positives = 38/76 (50%), Gaps = 6/76 (8%)  
 Frame = +3

Query 42 GIPGHPGHNGAPGRDGRDGTPEKEKGEKGDPLIGPKGDIGETGVPGAEGPRGFPGIQGRK 101  
 G+PG G +G G DG+DG G GE+G G GP G G G GP G G G+  
 Sbjct 15015 GVPGRAGADGVNGSDGKDGDGANGADGERGAVGPSPGAPGQGAQGERGERGPAGVNGADGKD 15194  
 Query 102 GEPGEGAYVYRSAFSV 117  
 G+ G RS SV  
 Sbjct 15195 GKDG-----RSVVSV 15224

Score = 39.3 bits (90), Expect = 0.013, Method: Compositional matrix adjust.  
 Identities = 32/67 (48%), Positives = 35/67 (52%), Gaps = 0/67 (0%)  
 Frame = +3

Query 40 MAGIPGHPGHNGAPGRDGRDGTPEKEKGEKGDPLIGPKGDIGETGVPGAEGPRGFPGIQG 99  
 + G+ G G GA G DGRDG PG G G G G G GA GP G G QG  
 Sbjct 14955 LNGVNGPDPLPGANGSDGRDGVPRAGADGVNGSDGKDGANGADGERGAVGPSPGAPGQG 15134



Query 100 RKGEPGE 106  
+GE GE  
Sbjct 15135 AQQERGE 15155

Score = 38.5 bits (88), Expect = 0.025, Method: Compositional matrix adjust.  
Identities = 29/61 (48%), Positives = 31/61 (51%), Gaps = 0/61 (0%)  
Frame = +3

Query 45 GHPGHNGAPGRDGRDGTTPGEKGEKGDPLIGPKGDIGETGVPGAEGPRGFPGIQGRKGE 104  
G PG NG+ GRDG G G G G G G GE G G GP G G QG +GE  
Sbjct 14979 GLPGANGSDGRDGVPRAGADGVNGSDGKDGANGADGERGAVGPSGPAGPQGAQGERGER 15158

Query 105 G 105  
G  
Sbjct 15159 G 15161

>NC\_018852.1 Propionibacterium phage P100D, complete genome  
Length=29506

Score = 42.7 bits (99), Expect = 0.001, Method: Compositional matrix adjust.  
Identities = 31/76 (41%), Positives = 39/76 (51%), Gaps = 12/76 (16%)  
Frame = +1

Query 42 GIPGHPGHNGAPGRDGRDGTTPGEKGEKGDPLIGPKGDIGETGVPGAEGPRGFPGIQGRK 101  
G+PG G +G G DGRDG+ GE+G+ +GP G G G G GP G G G+  
Sbjct 15025 GVPGRAGADGVNGVDGRDGSAGERGD-----VGPSGPSGPAGAQQGERGPAGVNGSDGKD 15186

Query 102 GEPGEGAYVYRSAFSV 117  
G+ G RS SV  
Sbjct 15187 GKDG-----RSVVSV 15216

Score = 38.1 bits (87), Expect = 0.037, Method: Compositional matrix adjust.  
Identities = 29/66 (44%), Positives = 33/66 (50%), Gaps = 0/66 (0%)  
Frame = +1

Query 40 MAGIPGHPGHNGAPGRDGRDGTTPGEKGEKGDPLIGPKGDIGETGVPGAEGPRGFPGIQG 99  
+ G+ G G GA G DG DG PG G G G+ G G GE G G GP G G QG  
Sbjct 14965 LNGVKGPDLPGANGSDGHDGVPRAGADGVNGVDGRDGSAGERGDVGPSGPSGPAGAQQ 15144

Query 100 RKGEPG 105  
+G G  
Sbjct 15145 ERGPAG 15162

>NC\_026440.1 Pandoravirus inopinatum isolate KlaHel, complete genome  
Length=2243109

Score = 42.7 bits (99), Expect = 0.001, Method: Compositional matrix adjust.  
Identities = 32/62 (52%), Positives = 39/62 (63%), Gaps = 3/62 (5%)  
Frame = +2

Query 52 APGRDGRDGTTPGEKGEKGDPLIGPKGDIGETGVPGAEGPR---GFPGIQGRKGEPEGGA 108  
A G+DG+DG G KGEKGD G GPKG+ G G GA+GP+ G G +G +G GE A  
Sbjct 2017676 AQQKDGKDGARGPKGEKGDGKPRGPKGEDGCPGARGAKGPKGDQGECPGRGPRGPKGEDA 2017855

Query 109 YV 110  
V  
Sbjct 2017856 VV 2017861

Score = 40.8 bits (94), Expect = 0.004, Method: Compositional matrix adjust.  
Identities = 37/122 (30%), Positives = 56/122 (46%), Gaps = 7/122 (6%)  
Frame = +3

Query 48 GHNGAPGRDGRDGTTPGEKGEKGDPLIGPKGDIGETGVPGAEGPRGFPGIQGRKGEPGEG 107  
G G G G +G G++G +G G GP+G G+ G G EG +G G QG+ GEP  
Sbjct 1931964 GPQGPQGLMGPEGPQGGQGGPEGPEGQGGPEGPEGQGGPEGPEGQGGPEGPEGQGGPEGQGPGEPRN 1932140

Query 108 AYVYRSAFSVGLETYVTIPNMPPIRFTKIFYN-----QQNHYDGSTGKFHCNIPGLYYFAY 162  
+R A + L Y P+ + Y+ N+YD +T F + +Y F  
Sbjct 1932141 TVAFR-ADGIVLSGYQGPVTDPVVYESEVYDLVNGAPANNDPTTWTFTAPLAAVYRFTA 1932317

Query 163 HI 164  
++  
Sbjct 1932318 NL 1932323

Score = 39.3 bits (90), Expect = 0.016, Method: Compositional matrix adjust.  
Identities = 34/71 (48%), Positives = 39/71 (55%), Gaps = 2/71 (3%)  
Frame = +2

Query 32 PKGACTGWMAGIPGHPGHNGAPGRDGRDGTTPGEKGEKGDPLIGPKGDIGETGVPGAEGP 91  
PKG C G G G G G+DG DG G KGEKGD G GPKG+ G G G +G  
Sbjct 2017301 PKGDC--GKCGPCGPRGPRGPKGKDGCDGERGPKGEKGDGKPRGPKGEDGCHGPRGPKGE 2017474

Query 92 RGFPGIQGRKG 102  
+G PG G+ G  
Sbjct 2017475 KGAPGPCGKCG 2017507

Score = 37.4 bits (85), Expect = 0.066, Method: Compositional matrix adjust.  
Identities = 31/98 (32%), Positives = 40/98 (41%), Gaps = 10/98 (10%)  
Frame = -2

Query 68 KGDPLIGPKGDIGETGVPGAEGPRGFPGIQGRKGEPGEGAYVYRSAFSVGLETYVTIPN 127  
+G PG +GP G G G PG GP G PG+ P + GL TI  
Sbjct 1627973 QGPPGQVGPPIGSTGAMGAPGDTGPTGPPGVAAIV--PMVAFRAVKDTTQTGLGPGTTI-- 1627806

Query 128 MPIRFTKIFYNQQN-----HYDGSTGKFHCNIPGLYYF 160  
I F + Y+ N +YD +T F G+Y F  
Sbjct 1627805 -TITFRQEIYDLVNGTTADNYDPTTSTFTAPADGVYRF 1627695

>NC\_018841.1 Propionibacterium phage P101A, complete genome  
Length=29574

Score = 42.4 bits (98), Expect = 0.001, Method: Compositional matrix adjust.  
Identities = 34/92 (37%), Positives = 45/92 (49%), Gaps = 10/92 (11%)  
Frame = +1

Query 42 GIPGHPGHNGAPGRDGRDGTTPGEKGEKGDPLIGPKGDIGETGVPGAEGPRGFPGIQGRK 101  
G+PG G +G G DG DG G GE+GD G GP G G G GP G G G+  
Sbjct 15031 GVPGRAGADGVNGVDGADGRDGSAGERGDVGPSPGAPQGAQGERGERGPAGANGSDGKD 15210

Query 102 GEPGEGAYVYRSAFSVGLETYVTIPNMPPIRFT 133  
G+ G RS SV Y + + +++  
Sbjct 15211 GKDG-----RSVVSV----YCSGGRLLVVKYS 15276

Score = 39.3 bits (90), Expect = 0.013, Method: Compositional matrix adjust.  
Identities = 31/67 (46%), Positives = 35/67 (52%), Gaps = 0/67 (0%)  
Frame = +1

Query 40 MAGIPGHPGHNGAPGRDGRDGTPEKGEKGDPLIGPKGDIGETGVPGAEGPRGFPGIQQ 99  
+ G+ G G GA G DGRDG PG G G G+ G G G G GP G G QQ  
Sbjct 14971 LNGVKGPDGLPGANGSDGRDGVPRAGADGVNGVDGADGRDGSAGERGDVGPSPAGPQG 15150

Query 100 RKGEPGE 106  
+GE GE  
Sbjct 15151 AQGERGE 15171

>NC\_022337.1 Propionibacterium phage PHL071N05, complete genome  
Length=29467

Score = 42.4 bits (98), Expect = 0.001, Method: Compositional matrix adjust.  
Identities = 33/92 (36%), Positives = 46/92 (50%), Gaps = 10/92 (11%)  
Frame = +2

Query 42 GIPGHPGHNGAPGRDGRDGTPEKGEKGDPLIGPKGDIGETGVPGAEGPRGFPGIQQRK 101  
G+PG G +G G DG+DG G GE+GD G GP G G G G G G G +G+  
Sbjct 15023 GVPGRAGVDGVAGVDGKDGANGADGERGDVGPSPAGPQGAQGERGERGNAGANGSEGKD 15202

Query 102 GEPGEGAYVYRSAFSVGLETYVTIPNMPPIRFT 133  
G+ G RS SV Y + + +++  
Sbjct 15203 GKDG-----RSVVSV----YCSEGRLLVVKYS 15268

Score = 38.1 bits (87), Expect = 0.031, Method: Compositional matrix adjust.  
Identities = 35/82 (43%), Positives = 44/82 (54%), Gaps = 3/82 (4%)  
Frame = +2

Query 26 GVLLPL-PKGA CTGWMAGIPGHPGHNGAPGRDGRDGTPEKGEKGDPLIGPKGDIGETG 84  
GV+ P+ P+G+ + G+ G G GA G+DG DG PG G G G+ G G G G  
Sbjct 14924 GVVGPVGPQGS P--GLNGVKGPDGLPGASGKDGHDGVPGRAGVDGVAGVDGKDGANGADG 15097

Query 85 VPGAEGPRGFPGIQQGRKGEPGE 106  
G GP G G QQ +GE GE  
Sbjct 15098 ERGDVGPSPAGPQGAQGERGE 15163

Score = 37.4 bits (85), Expect = 0.062, Method: Compositional matrix adjust.  
Identities = 25/63 (40%), Positives = 32/63 (51%), Gaps = 0/63 (0%)  
Frame = +2

Query 43 IPGHPGHNGAPGRDGRDGTPEKGEKGDPLIGPKGDIGETGVPGAEGPRGFPGIQQGRKG 102  
+ G PG G G+ G G G G G G++GP G G G+ G +GP G PG G+ G  
Sbjct 14837 VQGVPGPAGVVRQQGPAGADGRDGSNGSAGVVGPVGPQGS PGLNGVKGPDGLPGASGKDG 15016

Query 103 EPG 105  
G

Sbjct 15017 HDG 15025

>NC\_027629.1 Propionibacterium phage Attacne, complete genome  
Length=28876

Score = 42.4 bits (98), Expect = 0.001, Method: Compositional matrix adjust.  
Identities = 34/92 (37%), Positives = 46/92 (50%), Gaps = 10/92 (11%)  
Frame = +3

Query 42 GIPGHPGHNGAPGRDGRDGTPEKGEKGDPLIGPKGDIGETGVPGAEGPRGFPGIQGRK 101  
G+PG G +G G DG DG G GE+GD G GP G G G G GP G G G+  
Sbjct 15015 GVPGRAGADGVNGVDGADGRDGSAGERGDMGSPGAPGQGAQGERGERGPAGANGSDGKD 15194

Query 102 GEPGEGAYVYRSAFSVGLETYVTIPNMPPIRFT 133  
G+ G RS SV Y + ++ ++++  
Sbjct 15195 GKDG-----RSIVSV----YCSGGSLMVKYS 15260

>NC\_027385.1 Propionibacterium phage PHL092M00, complete genome  
Length=29261

Score = 42.4 bits (98), Expect = 0.001, Method: Compositional matrix adjust.  
Identities = 27/62 (44%), Positives = 36/62 (58%), Gaps = 0/62 (0%)  
Frame = +2

Query 42 GIPGHPGHNGAPGRDGRDGTPEKGEKGDPLIGPKGDIGETGVPGAEGPRGFPGIQGRK 101  
G+ G G +G G DGRDG+ GE+G+ G G GP+G GE G G++G G G G+  
Sbjct 15023 GVAGRAGADGVNGADGRDGSAGERGDVGPSPGAPGQGAQGERGERGSDGVNGSDGKDGKD 15202

Query 102 GE 103  
G  
Sbjct 15203 GR 15208

>NC\_003225.3 White spot syndrome virus strain CN01, complete genome  
Length=309286

Score = 42.4 bits (98), Expect = 0.001, Method: Compositional matrix adjust.  
Identities = 38/75 (51%), Positives = 42/75 (56%), Gaps = 12/75 (16%)  
Frame = +1

Query 41 AGIPGHPGHNGAPGRDGRDGT---PGEKGEKGDPL-----IGPKGDIGETGVP---GA 88  
AG PG G G PGRDG DG+ PGE+GE G G GP+G+ GE G P GA  
Sbjct 1558 AGPPGERGATGIPGRDGVDSVGPGERGETGPAGRDGSGVPAGPQGERGENRPPGRDGA 1737

Query 89 EGPRGFPGIQGRKGE 103  
GP G G QG KGE  
Sbjct 1738 TGPIGPAGPQGEKGE 1782

Score = 40.8 bits (94), Expect = 0.005, Method: Compositional matrix adjust.  
Identities = 29/58 (50%), Positives = 36/58 (62%), Gaps = 0/58 (0%)  
Frame = +1

Query 45 GHPGHNGAPGRDGRDGTPEKGEKGDPLIGPKGDIGETGVPGAEGPRGFPGIQGRKG 102  
G G NG PG+DG G G GE+G+ G IGP G G TG+PG +G G G QG++G  
Sbjct 2533 GEKGENRPPGKDGATGPMGPPGERGETGPIGPAGPQATGLPGRDGVDSVGPQGKRG 2706

Score = 39.7 bits (91), Expect = 0.012, Method: Compositional matrix adjust.  
Identities = 35/74 (47%), Positives = 40/74 (54%), Gaps = 12/74 (16%)  
Frame = +1

Query 41 AGIPGHPGHNGAPGRDGRDGTPEKEKGEKGDPL-----IGPKGDIGETGVP---GA 88  
AG PG G NG PGRDG G G G +G+ GL IGP+G+ GE G P GA  
Sbjct 2395 AGPPGERGENRPPGRDGATGPIGPAGPQGETGLAGLPGRDGAIGPQGEKGENRPGKDGA 2574

Query 89 EGPRGFPGIQGRKG 102  
GP G PG +G G  
Sbjct 2575 TGPMGPPGERGETG 2616

Score = 38.9 bits (89), Expect = 0.021, Method: Compositional matrix adjust.  
Identities = 44/106 (42%), Positives = 51/106 (48%), Gaps = 14/106 (13%)  
Frame = +1

Query 14 PGHDQETTTQGP----GVLLPLPKGACTGWMAGIPGHPGHNGAPGRDGRDGT---PGEKG 66  
PG D GP G + P + G AG PG G G PGRDG DG+ GE+G  
Sbjct 865 PGRDGAVGPAGPPGERGAIGPAGRDGAVGP-AGPPGERGATGIPGRDGVDSVGPQGERG 1041

Query 67 EKGDPL-----IGPKGDIGETGVPGAEGPRGFPGIQGRKGEPGE 106  
E G PG GP+G G TG G +G G G QG KGE G+  
Sbjct 1042 EIGRPPGRDGAVGPAGPQRRGATGRAGKDGAVGPAGPQGEKGEAGK 1179

Score = 37.7 bits (86), Expect = 0.042, Method: Compositional matrix adjust.  
Identities = 31/69 (45%), Positives = 37/69 (54%), Gaps = 3/69 (4%)  
Frame = +1

Query 41 AGIPGHPGHNGAPGRDGRDGTPEKEKGEKGDPLIGPKGDIGETGVPGAEGPRGF---GI 97  
AG PG G G PGR+G DG+ G +G +G G G G +G G PG G G P G+  
Sbjct 1432 AGPPGERGATGLPGRNGVDGSIGPQRRGATGRAGKDGAVGPAGPPGERGATGIPGRDGV 1611

Query 98 QGRKGEPGE 106  
G G PGE  
Sbjct 1612 DGSVGPPE 1638

Score = 37.7 bits (86), Expect = 0.044, Method: Compositional matrix adjust.  
Identities = 38/92 (41%), Positives = 47/92 (51%), Gaps = 9/92 (10%)  
Frame = +1

Query 14 PGHDQETTTQGPVLLPLPKGACTGWMAGIPGHPGHNGAPGRDGRDGTPEKEKGEKGDPL 73  
PG D E + GP L +GA G PG G G GR G+DG G G +G G+  
Sbjct 2881 PGRDGEDGSTGPMGPQGL-RGAT-----GAPGPQGERGLKGRPGKDGETGPPGRQGRDGI 3042

Query 74 IGPKGDIGETGVPGAEGPRGFPGIQGRKGEPG 105  
+GP+G GE G PG + G G +GR G PG  
Sbjct 3043 MGPRGLRGEKGAPGND---GLEGPEGRDAGP 3129

Score = 37.4 bits (85), Expect = 0.066, Method: Compositional matrix adjust.  
Identities = 33/70 (47%), Positives = 41/70 (59%), Gaps = 9/70 (13%)  
Frame = +1

Query 40 MAGIPGHPGHNGAPGRDGRDGTPEKGEKGDPLIGPKGDIGETGVPGAEGPRGFPG 96  
 + GI G G G G++GR G G +GEKGD KGD GE G+ GA+ GPRG G  
 Sbjct 3544 LTGIEGPRGPRGIQKKEGRMGKIGHRGEKGD-----KGDRGEQGIAGADGEKGPRLRG 3705

Query 97 IQGRKGEPEG 106  
 I+G G PG+  
 Sbjct 3706 IRGPIGAPGK 3735

>NC\_023557.1 Erwinia phage Ea35-70, complete genome  
 Length=271084

Score = 42.4 bits (98), Expect = 0.002, Method: Compositional matrix adjust.  
 Identities = 36/103 (35%), Positives = 46/103 (45%), Gaps = 15/103 (15%)  
 Frame = -1

Query 51 GAPGRDGRDGTPEKGEKGDPLIGPKGDIGET-----GVPGAEGPRGFPGIQGRKGE 104  
 G G G G G KG+KGD G +GPKGD G GV GA+G G G +G KG+  
 Sbjct 254125 GPKGDQGLKGDGTGAKGDKGDQGDVGPCKGDAGAAGKDGTDGVDGAKGDTGAKGDKGDKGDT 253946

Query 105 GEG-----AYVYRSAFSVGLTYVTIPNMPPIRFTKIFYN 138  
 G G A + S + YV N+ + T F +  
 Sbjct 253945 GAGLTIKGTVADASALPTTGSAGDAYVVGENLYVYITGSFQD 253817

>NC\_027294.1 Propionibacterium phage PHL150M00, complete genome  
 Length=29438

Score = 42.4 bits (98), Expect = 0.002, Method: Compositional matrix adjust.  
 Identities = 33/92 (36%), Positives = 46/92 (50%), Gaps = 10/92 (11%)  
 Frame = +2

Query 42 GIPGHPGHNGAPGRDGRDGTPEKGEKGDPLIGPKGDIGETGVPGAEGPRGFPGIQGRK 101  
 G+PG G +G G DG DG G GE+G+ G GP G G G G GP G G G+  
 Sbjct 15026 GVPGRAGADGVNVDGADGRDGSAGERGEQGPSGPAGPQGAQGERGERGPAGVNGSDGKD 15205

Query 102 GEPGEGAYVYRSAFSVGLTYVTIPNMPPIRFT 133  
 G+ G RS SV Y + ++ ++++  
 Sbjct 15206 GKDG-----RSVVSV----YCSGGSLVVKYS 15271

Score = 39.7 bits (91), Expect = 0.012, Method: Compositional matrix adjust.  
 Identities = 30/67 (45%), Positives = 36/67 (54%), Gaps = 0/67 (0%)  
 Frame = +2

Query 40 MAGIPGHPGHNGAPGRDGRDGTPEKGEKGDPLIGPKGDIGETGVPGAEGPRGFPGIQG 99  
 + G+ G G GA G+DG DG PG G G G+ G G G G G +GP G G QG  
 Sbjct 14966 LNGVKGPDLPGANGKDGVDGVPGRAGADGVNVDGADGRDGSAGERGEQGPSGPAGPQG 15145

Query 100 RKGEPEG 106  
 +GE GE  
 Sbjct 15146 AQGERGE 15166

>NC\_015453.1 Propionibacterium phage PAS50 endogenous virus, complete genome  
 Length=29017

Score = 42.4 bits (98), Expect = 0.002, Method: Compositional matrix adjust.

Identities = 26/52 (50%), Positives = 32/52 (62%), Gaps = 3/52 (6%)  
Frame = +3

Query 42 GIPGHPGHNGAPGRDGRDGT---PGEKGEKGDPLIGPKGDIGETGVPGAEG 90  
G+PG G +G G DGRDG GE+GE+G G GP+G+ GE G GA G  
Sbjct 14997 GVPGRAGADGVNGVDGRDGVNGSAGERGEQGPSGPAGPQGERGERGPAGANG 15152

Score = 39.3 bits (90), Expect = 0.014, Method: Compositional matrix adjust.  
Identities = 29/66 (44%), Positives = 34/66 (52%), Gaps = 0/66 (0%)  
Frame = +3

Query 40 MAGIPGHPGHNGAPGRDGRDGTTPGEKGEKGDPLIGPKGDIGETGVPGAEGPRGFPGIQG 99  
+ G+ G G G DGRDG PG G G G+ G G G G +GP G G QG  
Sbjct 14937 LNGVKGPDLPGVNGSDGRDGVNPGRAGADGVNGVDGRDGVNGSAGERGEQGPSGPAGPQG 15116

Query 100 RKGEPEG 105  
+GE G  
Sbjct 15117 ERGERG 15134

Score = 38.1 bits (87), Expect = 0.032, Method: Compositional matrix adjust.  
Identities = 26/63 (41%), Positives = 33/63 (52%), Gaps = 9/63 (14%)  
Frame = +3

Query 43 IPGHPGHNGAPGRDGRDGTTPGEKGEKGDPLIGPKGDIGETGVPGAEGPRGFPGIQGRKG 102  
+ G PG GA GRDG +G+ GL+GP G G G+ G +GP G PG+ G G  
Sbjct 14838 VQGVPGPAGADGRDGVNGS-----AGLVGVPVGPQGSPLNGVKGPDLPGVNGSDG 14990

Query 103 EPG 105  
G  
Sbjct 14991 RDG 14999

>NC\_028660.1 Escherichia phage phi191, complete genome  
Length=61035

Score = 42.4 bits (98), Expect = 0.002, Method: Compositional matrix adjust.  
Identities = 31/64 (48%), Positives = 35/64 (55%), Gaps = 0/64 (0%)  
Frame = -2

Query 42 GIPGHPGHNGAPGRDGRDGTTPGEKGEKGDPLIGPKGDIGETGVPGAEGPRGFPGIQGRK 101  
G+PG G G G G G +G KDPG GPKGD G G G +G G G QG K  
Sbjct 52787 GVPGPDKGDSGPAGPAGPRGVQGPDKGDPGPQGPKGDGTAAGAKGEKATGATGPQGPK 52608

Query 102 GEPG 105  
G+ G  
Sbjct 52607 GDTG 52596

Score = 37.7 bits (86), Expect = 0.042, Method: Compositional matrix adjust.  
Identities = 27/61 (44%), Positives = 33/61 (54%), Gaps = 0/61 (0%)  
Frame = -2

Query 45 GHPGHNGAPGRDGRDGTTPGEKGEKGDPLIGPKGDIGETGVPGAEGPRGFPGIQGRKGEP 104  
G G G G G G GE+G+ G G +GP G GE G G GP+G PG++G GE  
Sbjct 53378 GPKGETGVPVGPQGPAGPKGERGDVGAQGA VGPAGPRGEKGEQGERGPQGIPLKGDGTGER 53199

Query 105 G 105  
G  
Sbjct 53198 G 53196

Score = 37.0 bits (84), Expect = 0.084, Method: Compositional matrix adjust.  
Identities = 27/58 (47%), Positives = 29/58 (50%), Gaps = 0/58 (0%)  
Frame = -2

Query 45 GHPGHNGAPGRDGRDGTTPGEEKGKGDPLIGPKGDIGETGVPGAEGPRGFPPGIQGRKG 102  
G PG G G G G GEKG G G GPKGD G G G +GP+G G G G  
Sbjct 52706 GDPGPQGPKGDTGAAGAKGKGGATGATGPQGPKGDTGAAGPAGPQGPKGDTGAAGPAG 52533

>NC\_029077.1 Mycobacterium phage VohminGhazi, complete genome  
Length=52155

Score = 42.0 bits (97), Expect = 0.002, Method: Compositional matrix adjust.  
Identities = 30/70 (43%), Positives = 37/70 (53%), Gaps = 2/70 (3%)  
Frame = +3

Query 60 GTPGEEKGKGDPLIGPKGDIGETGVPGAEGPRGFPPGIQGRKGEPGEGAYVYRSAFSVGL 119  
G G KGEKGD G GP+G GE G G +GP+G G+QG +G GE +V  
Sbjct 4116 GARGPKGKGDTPQGPQGAKEQQAQGIQGPQGEQGVQGEQGPQGEAGLNLDIQGTV-- 4289

Query 120 ETYVTIPNMP 129  
TY +P P  
Sbjct 4290 ATYADLPTDP 4319

>NC\_022985.1 Mycobacterium phage Zaka, complete genome  
Length=52122

Score = 42.0 bits (97), Expect = 0.002, Method: Compositional matrix adjust.  
Identities = 30/70 (43%), Positives = 37/70 (53%), Gaps = 2/70 (3%)  
Frame = +3

Query 60 GTPGEEKGKGDPLIGPKGDIGETGVPGAEGPRGFPPGIQGRKGEPGEGAYVYRSAFSVGL 119  
G G KGEKGD G GP+G GE G G +GP+G G+QG +G GE +V  
Sbjct 4116 GARGPKGKGDTPQGPQGAKEQQAQGIQGPQGEQGVQGEQGPQGEAGLNLDIQGTV-- 4289

Query 120 ETYVTIPNMP 129  
TY +P P  
Sbjct 4290 ATYADLPTDP 4319

>NC\_022965.1 Mycobacterium phage CloudWang3, complete genome  
Length=52873

Score = 42.0 bits (97), Expect = 0.002, Method: Compositional matrix adjust.  
Identities = 30/70 (43%), Positives = 37/70 (53%), Gaps = 2/70 (3%)  
Frame = +3

Query 60 GTPGEEKGKGDPLIGPKGDIGETGVPGAEGPRGFPPGIQGRKGEPGEGAYVYRSAFSVGL 119  
G G KGEKGD G GP+G GE G G +GP+G G+QG +G GE +V  
Sbjct 4116 GARGPKGKGDTPQGPQGAKEQQAQGIQGPQGEQGVQGEQGPQGEAGLNLDIQGTV-- 4289

Query 120 ETYVTIPNMP 129



TY +P P  
Sbjct 4290 ATYADLPTDP 4319

>NC\_022334.1 Propionibacterium phage PHL112N00, complete genome  
Length=29266

Score = 42.0 bits (97), Expect = 0.002, Method: Compositional matrix adjust.  
Identities = 32/78 (41%), Positives = 42/78 (54%), Gaps = 6/78 (8%)  
Frame = +2

Query 40 MAGIPGHPGHNGAPGRDGRDGTTPGEKGEKGDPLIGPKGDIGETGVPGAEGPRGFPGIQQ 99  
+AG G G NG+ G+DGRDG+ GE+G+ +GP G G G G G RG G+ G  
Sbjct 15023 VAGRAGVAGVNGSDGKDGRDGSAGERD-----VGPSGPAGPQGAQGERGERGPAGVNG 15184

Query 100 RKGEPGEGAYVYRSAFSV 117  
G+ G+ RS SV  
Sbjct 15185 SDGKDGKDGKDGSRVSV 15238

Score = 37.7 bits (86), Expect = 0.040, Method: Compositional matrix adjust.  
Identities = 25/55 (45%), Positives = 28/55 (51%), Gaps = 0/55 (0%)  
Frame = +2

Query 42 GIPGHPGHNGAPGRDGRDGTTPGEKGEKGDPLIGPKGDIGETGVPGAEGPRGFPG 96  
G+ G G G G DG+DG G GE+GD G GP G G G G GP G G  
Sbjct 15020 GVAGRAGVAGVNGSDGKDGRDGSAGERGDVGPSPGAPGQGAQGERGERGPAGVNG 15184

>NC\_025444.1 Mycobacteriophage RedRock, complete genome  
Length=53332

Score = 42.0 bits (97), Expect = 0.002, Method: Compositional matrix adjust.  
Identities = 34/74 (46%), Positives = 41/74 (55%), Gaps = 9/74 (12%)  
Frame = +2

Query 48 GHNGAPGRDGRDGTTPGEKGEKGDPLIGPKGDIGETGVPGAEGPRGFPGIQQGRKGPGE 107  
G G G +G DG G KG+KGD G +GP+ G+ GA GPRG G QG KG+ G  
Sbjct 4700 GQTGPAGLNGVDGAQGPKGDKGDQGEMGPQ-----GLTGATGPRGPEGPQGPKGDQGPL 4861

Query 108 AYVYRSAFSVGLLET 121  
Y SA+ V LE  
Sbjct 4862 GY---SAYQVALEA 4894

Score = 38.1 bits (87), Expect = 0.034, Method: Compositional matrix adjust.  
Identities = 30/61 (49%), Positives = 34/61 (56%), Gaps = 6/61 (10%)  
Frame = +2

Query 48 GHNGAPGRDGRDGTTPGEKGEKGDPLIGPKGDIGET-----GVPGAEGPRGFPGIQQGRK 101  
G G G G G G KG+KGD G GPKGD G+T GV GA+GP+G G QG  
Sbjct 4601 GPQGIQGPQGITGLQGPKGDKGDTGAQGPKGDGTGQTGPAGLNGVDGAQGPKGDKGDQGEM 4780

Query 102 G 102  
G  
Sbjct 4781 G 4783

>NC\_023717.1 Cronobacter phage CR9, complete genome  
Length=151924

Score = 41.6 bits (96), Expect = 0.003, Method: Compositional matrix adjust.  
Identities = 30/63 (48%), Positives = 34/63 (54%), Gaps = 0/63 (0%)  
Frame = +1

```
Query 43 IPGHPhNGAPGRDGRDGTPEKGEKGDPLIGPKGDIGETGVPGAEGPRGFPGIQRKG 102
          I G G GA G G G G +G +G GL GP+G GETG GA GP G G QG +G
Sbjct 7681 IKGDKGDTGATGPQGPiGPTGPQGPegPEGLTGPQGPQGETGPQGATGPAGPAGAQQARG 7860

Query 103 EPG 105
          G
Sbjct 7861 PEG 7869
```

>NC\_023609.1 Mycobacterium phage RhynO, complete genome  
Length=46739

Score = 41.6 bits (96), Expect = 0.003, Method: Compositional matrix adjust.  
Identities = 32/71 (45%), Positives = 42/71 (59%), Gaps = 3/71 (4%)  
Frame = +2

```
Query 39 WMAGIPGHPhNGAPGRDGRDGTpg---EKGEKGDPLIGPKGDIGETGVPGAEGPRGF 95
          W+A + G G G PG +G +G G KG+KGD G GP+G G G GA GP+G
Sbjct 2489 WLASLVGPQGPkGDPGPEGPegPQGLQGPkGDKGDTGDRGPQGLQGPkGDTGATGPKGDT 2668

Query 96 GIQRKGEpGE 106
          G+QG KG+ G+
Sbjct 2669 GLQGPkGDKGD 2701
```

>NC\_029018.1 Mycobacterium phage Anubis, complete genome  
Length=50856

Score = 41.2 bits (95), Expect = 0.003, Method: Compositional matrix adjust.  
Identities = 32/78 (41%), Positives = 36/78 (46%), Gaps = 0/78 (0%)  
Frame = +2

```
Query 48 GHNGAPGRDGRDGTPEKGEKGDPLIGPKGDIGETGVPGAEGPRGFPGIQRKGEpGEG 107
          G G PG G G G G +GDpG GPKGD G TG G +GP+G G G G G
Sbjct 2345 GDTGNpGPtGPQGDIGPAGPQGDpGPQGPkGDTGATGPQGLQGPkGDKGDTGATGATGPA 2524

Query 108 AYVYRSAFSVGLETYVTI 125
          + S G TI
Sbjct 2525 NSLSIGTVSGGTSAAATI 2578
```

>NC\_027362.1 Propionibacterium phage PHL116M00, complete genome  
Length=29394

Score = 41.2 bits (95), Expect = 0.003, Method: Compositional matrix adjust.  
Identities = 29/64 (45%), Positives = 36/64 (56%), Gaps = 0/64 (0%)  
Frame = +2

```
Query 40 MAGIPGHPhNGAPGRDGRDGTPEKGEKGDPLIGPKGDIGETGVPGAEGPRGFPGIQQ 99
          ++G G G NGA G+DG +GT GE+G+ G G GP+G GE G GA G G G G
Sbjct 15035 VSGSAGAAGVNGADGKDGANGTDGERGDVGPSPAGPQGAQGERGERGAAGVNGADGKDG 15214
```

Query 100 RKGE 103  
G  
Sbjct 15215 ANGR 15226

Score = 38.9 bits (89), Expect = 0.020, Method: Compositional matrix adjust.  
Identities = 30/82 (37%), Positives = 36/82 (44%), Gaps = 3/82 (4%)  
Frame = +2

Query 42 GIPGHPGHNGAPGRDGRDGTPEKGEKGDPLIGPKGDIGETGVPGAEGPRGFPGIQGRK 101  
G+ G G G G DG+DG G GE+GD GP G G G G G RG G+ G  
Sbjct 15032 GVSGSAGAAGVNGADGKDGANGTDGERGDV---GPSGPAGPQGAQGERGERGAAGVNGAD 15202

Query 102 GEPGEGAYVYRSAFSVGLETYV 123  
G+ G S + G V  
Sbjct 15203 GKDGANGRSVVSVYCSGRLMV 15268

Score = 37.4 bits (85), Expect = 0.066, Method: Compositional matrix adjust.  
Identities = 31/77 (40%), Positives = 37/77 (48%), Gaps = 4/77 (5%)  
Frame = +2

Query 43 IPGHPGHNGAPGRDGRDGTPEKGEKGDPLIGPKGDIGETGVPGAEGPRGFPGIQGRK 102  
+ G PG G G G G G G PGL+GP G G G+ G +GP G PG G G  
Sbjct 14846 VQGVPGPTGVRGPQGPAGVDGRDGVNGLPGLVGPVGPQGSPLNGVKGPDPGLPGTNGSDG 15025

Query 103 EPGEGAYVYRSAFSVGL 119  
G V SA + G+  
Sbjct 15026 HDG----VSGSAGAAGV 15064

Score = 37.0 bits (84), Expect = 0.080, Method: Compositional matrix adjust.  
Identities = 34/83 (41%), Positives = 43/83 (52%), Gaps = 2/83 (2%)  
Frame = +2

Query 25 PGVLLPL-PKGA-CTGWMAGIPGHPGHNGAPGRDGRDGTPEKGEKGDPLIGPKGDIGE 82  
PG++ P+ P+G+ + G G PG NG+ G DG G+ G G G G G GE  
Sbjct 14930 PGLVGPVGPQGSPLNGVKGPDPGLPGTNGSDGHDGVSAGSAGAAGVNGADGKDGANGTDGE 15109

Query 83 TGVPGAEGPRGFPGIQGRKGEPE 105  
G G GP G G QG +GE G  
Sbjct 15110 RGDVGPSPGAPQGAQGERGERG 15178

>NC\_027624.1 Propionibacterium phage SKKY, complete genome  
Length=29594

Score = 41.2 bits (95), Expect = 0.003, Method: Compositional matrix adjust.  
Identities = 32/67 (48%), Positives = 37/67 (55%), Gaps = 3/67 (4%)  
Frame = +3

Query 40 MAGIPGHPGHNGAPGRDGRDGTPEKGEKGDPLIGPKGDIGETGVPGAEGPRGFPGIQG 99  
+ G+ G G +GA G DGRDG PG G G+ G G GE GV G GP G G QG  
Sbjct 15012 LNGVKGPDPGLSGANGSDGRDGVPRAGVD---GVDGRDGSAGEQGVQGPVGPSPGAAGPQG 15182

Query 100 RKGEPGE 106  
+GE GE

Sbjct 15183 AQGERGE 15203

Score = 38.1 bits (87), Expect = 0.036, Method: Compositional matrix adjust.  
Identities = 32/84 (38%), Positives = 41/84 (49%), Gaps = 9/84 (11%)  
Frame = +3

Query 40 MAGIPGHPGHNGAPGR-----DGRDGTTPGEKGEKGDPLIGPKGDIGETGVPGAEGPRG 93  
++G G G +G PGR DGRDG+ GE+G + G +GP G G G G G RG  
Sbjct 15039 LSGANGSDGRDGVPRAGVDGVDGRDGSAGEQGVQ---GPVGPSSGAAGPQGAQGERGERG 15209

Query 94 FPGIQGRKGEPEGAYVYRSAFSV 117  
G G+ G+ RS SV  
Sbjct 15210 PTGAN\*SDGKDGKDRDGRSVVSV 15281

>NC\_019442.1 Escherichia phage TL-2011c, complete genome  
Length=60523

Score = 41.2 bits (95), Expect = 0.004, Method: Compositional matrix adjust.  
Identities = 33/72 (46%), Positives = 36/72 (50%), Gaps = 0/72 (0%)  
Frame = +2

Query 41 AGIPGHPGHNGAPGRDGRDGTTPGEKGEKGDPLIGPKGDIGETGVPGAEGPRGFPGIQGR 100  
AG G G G G G G +G KGD G GP G G G GA GP G G QG  
Sbjct 41924 AGPQGPKGDRGERGETGLTGNAGPQGPKGDTGAAGPAGPQGPKGGETGAAGPVGATGPGQP 42103

Query 101 KGEPGEGAYVYR 112  
KG+PGE +R  
Sbjct 42104 KGDPGETQIRFR 42139

Score = 38.5 bits (88), Expect = 0.026, Method: Compositional matrix adjust.  
Identities = 28/64 (44%), Positives = 36/64 (56%), Gaps = 0/64 (0%)  
Frame = +2

Query 42 GIPGHPGHNGAPGRDGRDGTTPGEKGEKGDPLIGPKGDIGETGVPGAEGPRGFPGIQGRK 101  
G+PG G G G G G G +KGE+GD G +G G+ G G G GP+G G +G +  
Sbjct 41783 GVPGPKGDKDGTGPAGPAGPKGDKGERGDTGVPVATGERGPAGDAGPAGPQGPKGDRGER 41962

Query 102 GEPG 105  
GE G  
Sbjct 41963 GETG 41974

Score = 37.7 bits (86), Expect = 0.049, Method: Compositional matrix adjust.  
Identities = 27/61 (44%), Positives = 33/61 (54%), Gaps = 0/61 (0%)  
Frame = +2

Query 45 GHPGHNGAPGRDGRDGTTPGEKGEKGDPLIGPKGDIGETGVPGAEGPRGFPGIQGRKGE 104  
G G G G G G GE+G+ G G +GP G GE G G GP+G PG++G GE  
Sbjct 41192 GPKGETGVPVGPQGPAGPKGERGDVGAQGA VGPAGPRGEKGEQGERGPQGIPLKGDGTGER 41371

Query 105 G 105  
G  
Sbjct 41372 G 41374

>NC\_027625.1 Propionibacterium phage Kubed, complete genome  
Length=29461

Score = 41.2 bits (95), Expect = 0.004, Method: Compositional matrix adjust.  
Identities = 28/64 (44%), Positives = 32/64 (50%), Gaps = 0/64 (0%)  
Frame = +1

```
Query 42      GIPGHPGHNGAPGRDGRDGTPEKGEKGDPLIGPKGDIGETGVPGAEGPRGFPGIQGRK 101
          G+PG G G G DG +G G G G GL+GP G G G G GP G PG+ G
Sbjct 14848   GVPGERGPQGPTGADGVNGVNGRDGVNGSTGLVGPVGPQGSPGWNGVPGPSGLPGVDGSN 15027

Query 102     GEPG 105
          G G
Sbjct 15028   GADG 15039
```

Score = 38.1 bits (87), Expect = 0.036, Method: Compositional matrix adjust.  
Identities = 29/76 (38%), Positives = 39/76 (51%), Gaps = 8/76 (11%)  
Frame = +1

```
Query 26      GVLLPLPKGACTGWM-----AGIPGHPGHNGAPGRDGRDGTPEKGEKGDPLIGPKGDI 80
          G++ P+      GW      +G+PG G NGA G +G+DG      +G G+PG +GP G
Sbjct 14938   GLVGPVGPQGSPGWNGVPGPSGLPGVDGSNGADGVNGKDGA---QGAAGEPGRVGPSPGAA 15108

Query 81      GETGVPGAEGPRGFPG 96
          G G G GP G G
Sbjct 15109   GPQGEQGERGPAGSNG 15156
```

>NC\_018084.1 Clostridium phage phiZP2, complete genome  
Length=18078

Score = 41.2 bits (95), Expect = 0.004, Method: Compositional matrix adjust.  
Identities = 30/61 (49%), Positives = 34/61 (56%), Gaps = 3/61 (5%)  
Frame = -2

```
Query 40      MAGIPGHPGHNGAPGRDGRDGTPEKGEKGDPLIGPKGDIGETGVPGAEGPRGFPGIQG 99
          + G G PG GA G G G PG KGEKGDGP+ G G + G PGA G PGI G
Sbjct 9542    LKGAKGDPGAPGAKGERGEQGAPGAKGEKGDPIGPVGPVKRDKGDPGAP---GTPGING 9372

Query 100     R 100
          +
Sbjct 9371    Q 9369
```

>NC\_010353.1 Streptococcus phage 858, complete genome  
Length=35543

Score = 41.2 bits (95), Expect = 0.004, Method: Compositional matrix adjust.  
Identities = 28/87 (32%), Positives = 40/87 (46%), Gaps = 9/87 (10%)  
Frame = +3

```
Query 75      GPKGDIGETGVPGAEGPRGFPGIQGRKGEPEGAYVYRSFAFSVGLETYVTIPNMPPIRFTK 134
          GPKGD GE G+ G G +G PG +G G      +V      +S G + Y+ + P F +
Sbjct 18531   GPKGDRGERGLQGPRGDQIGIPGPKGIDGTDAPTIFVKSYSYTSAGSKAYIKLTG-PNAFEQ 18707

Query 135     IFYNQQNH----YDGSTGKF----HCN 153
          Y + H      D +T K      HC+
```

Sbjct 18708 TLYYSRGNVWVLDATTHKLKEFVHCD 18788

>NC\_031254.1 Arthrobacter phage Kitkat, complete genome  
Length=58560

Score = 40.8 bits (94), Expect = 0.004, Method: Compositional matrix adjust.  
Identities = 28/62 (45%), Positives = 38/62 (61%), Gaps = 3/62 (5%)  
Frame = +2

Query 48 GHNGAPGRDGRDGTTPGEKGEKGDPLIGPKGDI---GETGVPGAEGPRGFPGIQGRKGE 104  
G +GAPG+DG GTPG+ GE G+ G G G G+ G+ G +G G PG+ G+ G P  
Sbjct 29792 GKDGPAGKDGAPGTPGKDGEPGNDGAPGATGAGGKDGQVGLAGTDGQDGPVPGKDGAP 29971

Query 105 GE 106  
G+  
Sbjct 29972 GK 29977

>NC\_027984.1 Stx2 converting phage vB\_EcoP\_24B, complete genome  
Length=57677

Score = 40.8 bits (94), Expect = 0.004, Method: Compositional matrix adjust.  
Identities = 33/72 (46%), Positives = 36/72 (50%), Gaps = 0/72 (0%)  
Frame = +2

Query 41 AGIPGHPGHNGAPGRDGRDGTTPGEKGEKGDPLIGPKGDIGETGVPGAEGPRGFPGIQGR 100  
AG G G G G G G G +G KGD G GP G G G GA GP G G QG  
Sbjct 39596 AGPQGPKGDRGERGETGLTGNAGPQGPKGDTGAAGPAGPQGPGETGAAGPVGATGPPQP 39775

Query 101 KGEPGEGAYVYR 112  
KG+PGE +R  
Sbjct 39776 KGDPGETQIRFR 39811

Score = 38.5 bits (88), Expect = 0.028, Method: Compositional matrix adjust.  
Identities = 28/64 (44%), Positives = 36/64 (56%), Gaps = 0/64 (0%)  
Frame = +2

Query 42 GIPGHPGHNGAPGRDGRDGTTPGEKGEKGDPLIGPKGDIGETGVPGAEGPRGFPGIQGRK 101  
G+PG G G G G G G G +KGE+GD G +G G+ G G G GP+G G +G +  
Sbjct 39455 GVPGPKGDKGDTGPAGPAGPKGDKGERGDTGPVGATGERGPAGDAGPAGPQGPKGDRGER 39634

Query 102 GEPG 105  
GE G  
Sbjct 39635 GETG 39646

Score = 37.7 bits (86), Expect = 0.051, Method: Compositional matrix adjust.  
Identities = 27/61 (44%), Positives = 33/61 (54%), Gaps = 0/61 (0%)  
Frame = +2

Query 45 GHPGHNGAPGRDGRDGTTPGEKGEKGDPLIGPKGDIGETGVPGAEGPRGFPGIQGRKGE 104  
G G G G G G GE+G+ G G +GP G GE G G GP+G PG++G GE  
Sbjct 38864 GPKGETGVPVGPQGPAGPKGERGVDVAQAVGPAGPRGEKGEQGERGPPQIPGLKGDGTGER 39043

Query 105 G 105  
G

Sbjct 39044 G 39046

>NC\_004913.3 Stx1 converting phage DNA, complete genome  
Length=59866

Score = 40.8 bits (94), Expect = 0.004, Method: Compositional matrix adjust.  
Identities = 33/72 (46%), Positives = 36/72 (50%), Gaps = 0/72 (0%)  
Frame = +1

Query 41 AGIPGHPGHNGAPGRDGRDGTTPGEKGEKGDPLIGPKGDIGETGVPGAEGPRGFPGIQGR 100  
AG G G G G G G G +G KGD G GP G G G GA GP G G QG  
Sbjct 9457 AGPQGPKGDRGERGETGLTGNAGPQGPKGDTGAAGPAGPQGPKGETGAAGPVGATGPQGP 9636

Query 101 KGEPGEGAYVYR 112  
KG+PGE +R  
Sbjct 9637 KGDPGETQIRFR 9672

Score = 38.5 bits (88), Expect = 0.028, Method: Compositional matrix adjust.  
Identities = 28/64 (44%), Positives = 36/64 (56%), Gaps = 0/64 (0%)  
Frame = +1

Query 42 GIPGHPGHNGAPGRDGRDGTTPGEKGEKGDPLIGPKGDIGETGVPGAEGPRGFPGIQGRK 101  
G+PG G G G G G G +KGE+GD G +G G+ G G G GP+G G +G +  
Sbjct 9316 GVPGPKGDKGDTGPAGPAGPKGDKGERGDTGVPVATGERGPAGDAGPAGPQGPKGDRGER 9495

Query 102 GEPG 105  
GE G  
Sbjct 9496 GETG 9507

Score = 37.7 bits (86), Expect = 0.051, Method: Compositional matrix adjust.  
Identities = 27/61 (44%), Positives = 33/61 (54%), Gaps = 0/61 (0%)  
Frame = +1

Query 45 GHPGHNGAPGRDGRDGTTPGEKGEKGDPLIGPKGDIGETGVPGAEGPRGFPGIQGRKGEP 104  
G G G G G G GE+G+ G G +GP G GE G G GP+G PG++G GE  
Sbjct 8725 GPKGETGPVGPQGPAGPKGERGDVGAQGA VGPAGPRGEKGEQGERGPQGIPGLKGD TGER 8904

Query 105 G 105  
G  
Sbjct 8905 G 8907

>NC\_000902.1 Enterobacteria phage VT2-Sakai, complete genome  
Length=60942

Score = 40.8 bits (94), Expect = 0.004, Method: Compositional matrix adjust.  
Identities = 33/72 (46%), Positives = 36/72 (50%), Gaps = 0/72 (0%)  
Frame = +1

Query 41 AGIPGHPGHNGAPGRDGRDGTTPGEKGEKGDPLIGPKGDIGETGVPGAEGPRGFPGIQGR 100  
AG G G G G G G G +G KGD G GP G G G GA GP G G QG  
Sbjct 38512 AGPQGPKGDRGERGETGLTGNAGPQGPKGDTGAAGPAGPQGPKGETGAAGPVGATGPQGP 38691

Query 101 KGEPGEGAYVYR 112  
KG+PGE +R

Sbjct 38692 KGDPGETQIRFR 38727

Score = 38.5 bits (88), Expect = 0.028, Method: Compositional matrix adjust.  
Identities = 28/64 (44%), Positives = 36/64 (56%), Gaps = 0/64 (0%)  
Frame = +1

Query 42 GIPGHPGHNGAPGRDGRDGTPEKEKGEKGDPLIGPKGDIGETGVPGAEGPRGFPGIQGRK 101  
G+PG G G G G G G+KGE+GD G +G G+ G G G GP+G G +G +  
Sbjct 38371 GVPGPKGDKGDTGPAGPAGPKGDKGERGDTGPVGGATGERGPAGDAGPAGPQGPKGDRGER 38550

Query 102 GEPG 105  
GE G  
Sbjct 38551 GETG 38562

Score = 37.7 bits (86), Expect = 0.051, Method: Compositional matrix adjust.  
Identities = 27/61 (44%), Positives = 33/61 (54%), Gaps = 0/61 (0%)  
Frame = +1

Query 45 GHPGHNGAPGRDGRDGTPEKEKGEKGDPLIGPKGDIGETGVPGAEGPRGFPGIQGRKGE 104  
G G G G G G GE+G+ G G +GP G GE G G GP+G PG++G GE  
Sbjct 37780 GPKGETGPVGPQGPAGPKGERGDVGAQGA VGPAGPRGEKGEQGERGPQGIPGLKGDGTGER 37959

Query 105 G 105  
G  
Sbjct 37960 G 37962

>NC\_000924.1 Enterobacteria phage 933W, complete genome  
Length=61670

Score = 40.8 bits (94), Expect = 0.004, Method: Compositional matrix adjust.  
Identities = 33/72 (46%), Positives = 36/72 (50%), Gaps = 0/72 (0%)  
Frame = +3

Query 41 AGIPGHPGHNGAPGRDGRDGTPEKEKGEKGDPLIGPKGDIGETGVPGAEGPRGFPGIQGR 100  
AG G G G G G G G +G KGD G GP G G G GA GP G G QG  
Sbjct 39471 AGPQGPKGDRGERGETGLTGNAGPQGPKGDTGAAGPAGPQGPGETGAAGPVGATGPQGP 39650

Query 101 KGEPGEGAYVYR 112  
KG+PGE +R  
Sbjct 39651 KGDPGETQIRFR 39686

Score = 38.5 bits (88), Expect = 0.028, Method: Compositional matrix adjust.  
Identities = 28/64 (44%), Positives = 36/64 (56%), Gaps = 0/64 (0%)  
Frame = +3

Query 42 GIPGHPGHNGAPGRDGRDGTPEKEKGEKGDPLIGPKGDIGETGVPGAEGPRGFPGIQGRK 101  
G+PG G G G G G G+KGE+GD G +G G+ G G G GP+G G +G +  
Sbjct 39330 GVPGPKGDKGDTGPAGPAGPKGDKGERGDTGPVGGATGERGPAGDAGPAGPQGPKGDRGER 39509

Query 102 GEPG 105  
GE G  
Sbjct 39510 GETG 39521



Score = 37.7 bits (86), Expect = 0.051, Method: Compositional matrix adjust.  
Identities = 27/61 (44%), Positives = 33/61 (54%), Gaps = 0/61 (0%)  
Frame = +3

```
Query 45      GHPGHNGAPGRDGRDGTTPGEKGEKGDPLIGPKGDIGETGVPGAEGPRGFPPGIQGRKGEP 104
              G G G G G G GE+G+ G G +GP G GE G G GP+G PG++G GE
Sbjct 38739   GPKGETGPVGPQGPAGPKGERGDVGAQGA VGPAGPRGEKGEQGERGPQGIPGLKGD TGER 38918

Query 105     G 105
              G
Sbjct 38919   G 38921
```

>NC\_004914.3 Stx2 converting phage II DNA, complete genome  
Length=62706

Score = 40.8 bits (94), Expect = 0.004, Method: Compositional matrix adjust.  
Identities = 33/72 (46%), Positives = 36/72 (50%), Gaps = 0/72 (0%)  
Frame = +2

```
Query 41      AGIPGHPGHNGAPGRDGRDGTTPGEKGEKGDPLIGPKGDIGETGVPGAEGPRGFPPGIQGR 100
              AG G G G G G G G +G KGD G GP G G G GA GP G G QG
Sbjct 9458    AGPQGPKGDRGERGETGLTGNAGPQGPKGDTGAAGPAGPQGPKGETGAAGPVGATGPQGP 9637

Query 101     KGEPGEGAYVYR 112
              KG+PGE +R
Sbjct 9638    KGDPGETQIRFR 9673
```

Score = 38.5 bits (88), Expect = 0.028, Method: Compositional matrix adjust.  
Identities = 28/64 (44%), Positives = 36/64 (56%), Gaps = 0/64 (0%)  
Frame = +2

```
Query 42      GIPGHPGHNGAPGRDGRDGTTPGEKGEKGDPLIGPKGDIGETGVPGAEGPRGFPPGIQGRK 101
              G+PG G G G G G G G+KGE+GD G +G G+ G G G GP+G G +G +
Sbjct 9317    GVPGPKGDKGDTGPAGPAGPKGDKGERGDTGPVGATGERGPAGDAGPAGPQGPKGDRGER 9496

Query 102     GEPG 105
              GE G
Sbjct 9497    GETG 9508
```

Score = 37.7 bits (86), Expect = 0.051, Method: Compositional matrix adjust.  
Identities = 27/61 (44%), Positives = 33/61 (54%), Gaps = 0/61 (0%)  
Frame = +2

```
Query 45      GHPGHNGAPGRDGRDGTTPGEKGEKGDPLIGPKGDIGETGVPGAEGPRGFPPGIQGRKGEP 104
              G G G G G G GE+G+ G G +GP G GE G G GP+G PG++G GE
Sbjct 8726    GPKGETGPVGPQGPAGPKGERGDVGAQGA VGPAGPRGEKGEQGERGPQGIPGLKGD TGER 8905

Query 105     G 105
              G
Sbjct 8906    G 8908
```

>NC\_010237.1 Enterobacteria phage Min27, complete genome  
Length=63395

Score = 40.8 bits (94), Expect = 0.004, Method: Compositional matrix adjust.  
Identities = 33/72 (46%), Positives = 36/72 (50%), Gaps = 0/72 (0%)  
Frame = +2

```
Query 41 AGIPGHPGHNGAPGRDGRDGTTPGEKGEKGDPLIGPKGDIGETGVPGAEGPRGFPGIQGR 100
AG G G G G G G G +G KGD G GP G G G GA GP G G QG
Sbjct 41150 AGPQGPKGDRGERGETGLTGNAGPQGPKGDTGAAGPAGPQGPKGETGAAGPVGATGPQGP 41329

Query 101 KGEPGEGAYVYR 112
KG+PGE +R
Sbjct 41330 KGDPGETQIRFR 41365
```

Score = 38.5 bits (88), Expect = 0.028, Method: Compositional matrix adjust.  
Identities = 28/64 (44%), Positives = 36/64 (56%), Gaps = 0/64 (0%)  
Frame = +2

```
Query 42 GIPGHPGHNGAPGRDGRDGTTPGEKGEKGDPLIGPKGDIGETGVPGAEGPRGFPGIQGRK 101
G+PG G G G G G G +KGE+GD G +G G+ G G G GP+G G +G +
Sbjct 41009 GVPGPKGDKGDTGPAGPAGPKGDKGERGDTGPVGATGERGPAGDAGPAGPQGPKGDRGER 41188

Query 102 GEPG 105
GE G
Sbjct 41189 GETG 41200
```

Score = 37.7 bits (86), Expect = 0.051, Method: Compositional matrix adjust.  
Identities = 27/61 (44%), Positives = 33/61 (54%), Gaps = 0/61 (0%)  
Frame = +2

```
Query 45 GHPGHNGAPGRDGRDGTTPGEKGEKGDPLIGPKGDIGETGVPGAEGPRGFPGIQGRKGEP 104
G G G G G G GE+G+ G G +GP G GE G G GP+G PG++G GE
Sbjct 40418 GPKGETGPVGPQGPAGPKGERGDVGAQGA VGPAGPRGEKGEQGERGPQGIPLKGDGTGER 40597

Query 105 G 105
G
Sbjct 40598 G 40600
```

>NC\_028449.1 Escherichia phage PA2, complete genome  
Length=63569

Score = 40.8 bits (94), Expect = 0.004, Method: Compositional matrix adjust.  
Identities = 33/72 (46%), Positives = 36/72 (50%), Gaps = 0/72 (0%)  
Frame = +1

```
Query 41 AGIPGHPGHNGAPGRDGRDGTTPGEKGEKGDPLIGPKGDIGETGVPGAEGPRGFPGIQGR 100
AG G G G G G G G +G KGD G GP G G G GA GP G G QG
Sbjct 45448 AGPQGPKGDRGERGETGLTGNAGPQGPKGDTGAAGPAGPQGPKGETGAAGPVGATGPQGP 45627

Query 101 KGEPGEGAYVYR 112
KG+PGE +R
Sbjct 45628 KGDPGETQIRFR 45663
```

Score = 38.5 bits (88), Expect = 0.028, Method: Compositional matrix adjust.  
Identities = 28/64 (44%), Positives = 36/64 (56%), Gaps = 0/64 (0%)  
Frame = +1

Query 42 GIPGHPGHNGAPGRDGRDGTTPGEKGEKGDPLIGPKGDIGETGVPGAEGPRGFPGIQGRK 101  
 G+PG G G G G G G+KGE+GD G +G G+ G G G GP+G G +G +  
 Sbjct 45307 GVPGPKGDKGDTGPAGPAGPKGDKGERGDTGVPVATGERGPAGDAGPAGPQGPKGDRGER 45486

Query 102 GEPG 105  
 GE G  
 Sbjct 45487 GETG 45498

Score = 37.7 bits (86), Expect = 0.051, Method: Compositional matrix adjust.  
 Identities = 27/61 (44%), Positives = 33/61 (54%), Gaps = 0/61 (0%)  
 Frame = +1

Query 45 GHPGHNGAPGRDGRDGTTPGEKGEKGDPLIGPKGDIGETGVPGAEGPRGFPGIQGRKGE 104  
 G G G G G G GE+G+ G G +GP G GE G G GP+G PG++G GE  
 Sbjct 44716 GPKGETGVPVGPQGPAGPKGERGDVGAQGA VGPAGPRGEKGEQGERGPQGIPLKGDGTGER 44895

Query 105 G 105  
 G  
 Sbjct 44896 G 44898

>NC\_028656.1 Enterobacteria phage VT2phi\_272, complete sequence  
 Length=65955

Score = 40.8 bits (94), Expect = 0.004, Method: Compositional matrix adjust.  
 Identities = 33/72 (46%), Positives = 36/72 (50%), Gaps = 0/72 (0%)  
 Frame = +3

Query 41 AGIPGHPGHNGAPGRDGRDGTTPGEKGEKGDPLIGPKGDIGETGVPGAEGPRGFPGIQGR 100  
 AG G G G G G G G +G KGD G GP G G G GA GP G G QG  
 Sbjct 46827 AGPQGPKGDRGERGETGLTGNAGPQGPKGDTGAAGPAGPQGPQGPGETGAAGPVGATGPQGP 47006

Query 101 KGEPGEGAYVYR 112  
 KG+PGE +R  
 Sbjct 47007 KGDPGETQIRFR 47042

Score = 38.5 bits (88), Expect = 0.028, Method: Compositional matrix adjust.  
 Identities = 28/64 (44%), Positives = 36/64 (56%), Gaps = 0/64 (0%)  
 Frame = +3

Query 42 GIPGHPGHNGAPGRDGRDGTTPGEKGEKGDPLIGPKGDIGETGVPGAEGPRGFPGIQGRK 101  
 G+PG G G G G G G+KGE+GD G +G G+ G G G GP+G G +G +  
 Sbjct 46686 GVPGPKGDKGDTGPAGPAGPKGDKGERGDTGVPVATGERGPAGDAGPAGPQGPKGDRGER 46865

Query 102 GEPG 105  
 GE G  
 Sbjct 46866 GETG 46877

Score = 37.7 bits (86), Expect = 0.051, Method: Compositional matrix adjust.  
 Identities = 27/61 (44%), Positives = 33/61 (54%), Gaps = 0/61 (0%)  
 Frame = +3

Query 45 GHPGHNGAPGRDGRDGTTPGEKGEKGDPLIGPKGDIGETGVPGAEGPRGFPGIQGRKGE 104  
 G G G G G G GE+G+ G G +GP G GE G G GP+G PG++G GE

Sbjct 46095 GPKGETGVPVGPQGPAGPKGERGDVGAQGA VGPAGPRGEKGEQGERGPQGIPGLKGD TGER 46274  
Query 105 G 105  
G  
Sbjct 46275 G 46277

>NC\_018838.1 Propionibacterium phage P100\_A, complete genome  
Length=29505

Score = 40.8 bits (94), Expect = 0.004, Method: Compositional matrix adjust.  
Identities = 32/67 (48%), Positives = 36/67 (54%), Gaps = 3/67 (4%)  
Frame = +3

Query 40 MAGIPGHHPGHNGAPGRDGRDGTPEKGEKGD PGLIGPKGDIGETGVPGAEGPRGFPGIQG 99  
+ G+ G G GA G DGRDG PG G G+ G G GE GV G GP G G QG  
Sbjct 14979 LNGVKGPDPGLPGANGSDGRDGVPRAGVD---GVDGRDGSAGEQGVQGPVGPSPGAAGPQG 15149

Query 100 RKGEPGE 106  
+GE GE  
Sbjct 15150 AQGERGE 15170

Score = 38.1 bits (87), Expect = 0.037, Method: Compositional matrix adjust.  
Identities = 30/79 (38%), Positives = 38/79 (48%), Gaps = 3/79 (4%)  
Frame = +3

Query 45 GHPGHNGAPGRDGRDGTPEKGEKGD PGLIGPKGDIGETGVPGAEGPRGFPGIQGRKGE P 104  
G PG G G DGRDG+ GE+G +G +GP G G G G G RG G G G+  
Sbjct 15039 GVPGRAGVDGVDGRDGSAGEQGVQGP---VGPSPGAAGPQGAQGERGERGPAGANGSDGKD 15209

Query 105 GEGAYVYRSFAFSVGL ETVV 123  
G+ S + G +V  
Sbjct 15210 GKDGRSVVSMYCSGGRLFV 15266

Score = 35.0 bits (79), Expect(2) = 0.096, Method: Compositional matrix adjust.  
Identities = 27/64 (42%), Positives = 31/64 (48%), Gaps = 3/64 (5%)  
Frame = +3

Query 42 GIPGHHPGHNGAPGRDGRDGTPEKGEKGD PGLIGPKGDIGETGVPGAEGPRGFPGIQGRK 101  
G+PG G G G G DG G G GL+GP G G G+ G +GP G PG G  
Sbjct 14859 GVPGPAGERGPQGPAGADG---RNGVNGSAGLVGPVGPQGSPLNGVKGPDGLPGANGSD 15029

Query 102 GEPG 105  
G G  
Sbjct 15030 GRDG 15041

Score = 20.4 bits (41), Expect(2) = 0.096, Method: Compositional matrix adjust.  
Identities = 8/16 (50%), Positives = 8/16 (50%), Gaps = 0/16 (0%)  
Frame = +2

Query 24 GPGVLLPLPKGACTGW 39  
G GV P G C GW  
Sbjct 14741 GEGVSQPCSAGVCAGW 14788

>NC\_019914.1 Staphylococcus phage StB27, complete genome  
Length=40071

Score = 40.8 bits (94), Expect = 0.005, Method: Compositional matrix adjust.  
Identities = 24/44 (55%), Positives = 27/44 (61%), Gaps = 0/44 (0%)  
Frame = +2

Query 63 GEKGEKGDPLIGPKGDIGETGVPGAEGPRGFPGIQGRKGEPGE 106  
G KG+KGD G GPKGD G G+ G GP G G G KG+ GE  
Sbjct 36500 GPKGDKGDTGPGQPKGDKGADGINGEMGPAGPTGPMGPKGDTGE 36631

>NC\_002515.1 Mycoplasma phage P1, complete genome  
Length=11660

Score = 40.8 bits (94), Expect = 0.005, Method: Compositional matrix adjust.  
Identities = 25/69 (36%), Positives = 35/69 (51%), Gaps = 0/69 (0%)  
Frame = -3

Query 34 GACTGWMAGIPGHHPGHNGAPGRDGRDGTTPGEKGEKGDPLIGPKGDIGETGVPGAEGPRG 93  
+ ++ + G G G G G G G G +G G+ GPKGD G TG G +GP+G  
Sbjct 8451 NTISSYIEALRGPQGVQPKGDRGERGPQGTTLQGAQGVQPKGDRGATGPQGLQGPKG 8272

Query 94 FPGIQGRKG 102  
G +G +G  
Sbjct 8271 DRGERGPQG 8245

Score = 37.4 bits (85), Expect = 0.054, Method: Compositional matrix adjust.  
Identities = 32/89 (36%), Positives = 43/89 (48%), Gaps = 3/89 (3%)  
Frame = -3

Query 51 GAPGRDGRDGTTPGEKGEKGDPLIGPKGDIGETGVPGAEGPRGFPGIQGRKGEPGEGAYV 110  
G G G G GE+G +G GL G +G G G GA GP+G G +G +GE G +  
Sbjct 8418 GPQGVQPKGDRGERGPQGTTLQGAQGVQPKGDRGATGPQGLQGPKGDRGERGPQGM 8239

Query 111 YRSAFSVPLETYVTIPNMPPIRFTKIFYNQ 139  
FS E TI N+ + ++ NQ  
Sbjct 8238 PSLTFSHNKE---TIDNVKYAYIRVGSNQ 8161

>NC\_009541.1 Propionibacterium phage PA6, complete genome  
Length=29739

Score = 40.8 bits (94), Expect = 0.005, Method: Compositional matrix adjust.  
Identities = 40/102 (39%), Positives = 44/102 (43%), Gaps = 20/102 (20%)  
Frame = +2

Query 45 GHPGHNGAPGRDG-----RDGTTPGEKGEKGDPLIGPKGDIGETGVPGAEGPRGF 95  
G PG NG+ GRDG DG G GE+GD G GP G G G G GP G  
Sbjct 15011 GLPGANGSDGRDGVNDGADGRDGSAGERDVGPSGPAGPQGAQGERGERGPAGAN 15190

Query 96 GIQGRKGEPGEGAYVYRSAFSV-----GLET----YVTIP 126  
G G+ G+ G RS SV G ET Y IP  
Sbjct 15191 GTNGKDKGDGADGRDGRSVSVYCFGGLPGCETITCGYRVIP 15316

>NC\_027295.1 Propionibacterium phage PHL199M00, complete genome

Length=29806

Score = 40.4 bits (93), Expect = 0.006, Method: Compositional matrix adjust.  
Identities = 30/66 (45%), Positives = 34/66 (52%), Gaps = 0/66 (0%)  
Frame = +1

Query 40 MAGIPGHPGHNGAPGRDGRDGTPEKGEKGDPLIGPKGDIGETGVPGAEGPRGFPGIQG 99  
+ G+ G G GA G DGRDG PG G G G+ G G G G PG G G G QG  
Sbjct 14950 LNGVKGPDGLPGANGSDGRDGVPGVAGADGVNGVDGANGKDGANGEPGRMGHSLAGPQG 15129

Query 100 RKGEPG 105  
+GE G  
Sbjct 15130 ERGERG 15147

Score = 39.7 bits (91), Expect = 0.011, Method: Compositional matrix adjust.  
Identities = 29/76 (38%), Positives = 36/76 (47%), Gaps = 0/76 (0%)  
Frame = +1

Query 42 GIPGHPGHNGAPGRDGRDGTPEKGEKGDPLIGPKGDIGETGVPGAEGPRGFPGIQGRK 101  
G+ G G NG G +G+DG GE G G GL GP+G+ GE G G G G G G+  
Sbjct 15019 GVAGADGVNGVDGANGKDGANGEPGRMGHSLAGPQGERGERGPAGVNGSDGKNGKDGKD 15198

Query 102 GEPGEGAYVYRSAFSV 117  
G Y + V  
Sbjct 15199 GRSVVSVYCFEGRLVV 15246

>NC\_024789.1 Escherichia phage bV\_EcoS\_AKS96, complete genome  
Length=45746

Score = 40.4 bits (93), Expect = 0.007, Method: Compositional matrix adjust.  
Identities = 25/58 (43%), Positives = 34/58 (59%), Gaps = 6/58 (10%)  
Frame = +2

Query 48 GHNGAPGRDGRDGTPEKGEKGDPLIGPKGDIGETGVPGAEGPRGFPGIQGRKGEPPG 105  
G G GRDG G G +G +G+ G GP+G+ G+T GP+G G +G KG+PG  
Sbjct 6695 GFKGTTGRDGMAGPQPQPQRGEVGPQPQGEKGDGDT-----GPQGLKGDKGDKGDPG 6850

>NC\_031074.1 Gordonia phage Bantam, complete genome  
Length=92580

Score = 40.0 bits (92), Expect = 0.007, Method: Compositional matrix adjust.  
Identities = 21/43 (49%), Positives = 27/43 (63%), Gaps = 0/43 (0%)  
Frame = +2

Query 51 GAPGRDGRDGTPEKGEKGDPLIGPKGDIGETGVPGAEGPRG 93  
G G G G G+KG++GD G +GPKGD G+ G G +GP G  
Sbjct 35669 GTKGDTGERGAKGDKGDRGDKGDLGPKGDKGDKGDQGIQGPAG 35797

Score = 38.1 bits (87), Expect = 0.030, Method: Compositional matrix adjust.  
Identities = 26/72 (36%), Positives = 33/72 (46%), Gaps = 0/72 (0%)  
Frame = +2

Query 47 PGHNGAPGRDGRDGTPEKGEKGDPLIGPKGDIGETGVPGAEGPRGFPGIQGRKGEPPG 106  
PG G G G G G++G+KGD G G KGD G+ G+ G GP Q E

Sbjct 35666 PGTKGDTGERGAKGDKGDRGDKGDLGPKGDKGDKGDKGQGIQGPAGPAVSEADQVAIALRPE 35845

Query 107 GAYVYRSAFVSFG 118  
G Y + + G

Sbjct 35846 GVIYAWHDHLAFG 35881

>NC\_031927.1 Synechococcus phage S-CAM7 isolate 0910CC49, complete genome  
Length=216121

Score = 40.0 bits (92), Expect = 0.007, Method: Compositional matrix adjust.  
Identities = 37/87 (43%), Positives = 42/87 (48%), Gaps = 3/87 (3%)  
Frame = +2

Query 36 CTGWMAGIPGHHPGHNGAPGRDGRDGTTPGEKGEKGDPLIGPKGDIGETGVPGAEGPRGFP 95  
TG + IPG G GA G G G G G G GL G G G TG G +GP G  
Sbjct 171083 ATGPPQSVIPGATGPFVATGL-GATGATGVFGSTGATGLTGSTGVFGSTGATGIDGPVGS 171259

Query 96 GIQGRKGEPEG-EGAY-VYRSAFVSFVGL 120  
GIQG G G G+ V+ S + GLE  
Sbjct 171260 GIQGPATGATGLTGSTGVFGSTGATGLE 171340

Score = 39.7 bits (91), Expect = 0.012, Method: Compositional matrix adjust.  
Identities = 33/95 (35%), Positives = 42/95 (44%), Gaps = 11/95 (12%)  
Frame = +3

Query 32 PKGACTGWMAGIPGHHPGHNGAPGRDGRDGTTPGEKGEKGDPLIGPKGDIGETGV----- 85  
PKG + G G G G G G G G G KG++GD G GP+GDIG +G  
Sbjct 179703 PKGDQGDALIGATGATGDQDQDEGVPVGSATGPKGDQDQDAVIGATGPQGDIGASGATGPQ 179882

Query 86 -----PGAEGPRGFPGIQGRKGEPEGAYVYRSAF 115  
GA GP+G PG G G Y+ ++  
Sbjct 179883 GDIGASGATGPKGDPSAGVSATLTAGTYLSGDSY 179987

Score = 37.7 bits (86), Expect = 0.051, Method: Compositional matrix adjust.  
Identities = 31/83 (37%), Positives = 40/83 (48%), Gaps = 12/83 (14%)  
Frame = +2

Query 42 GIPGHHPGHNGAPGRDGRDGTTPGEKGEKGDPLIGPKGDIGETGVPGAEGPRG-FPGIQGR 100  
G+PG PG + G+ G G +G G GP+G G TG+ GA GP+ PG G  
Sbjct 170966 GVPGGPGGS-----LRGSTGATGPRGPQGFEGPRGSTGSTGLTGATGPPQSVIPGATGP 171124

Query 101 KGEPGEGAY----VYRSAFVSFVGL 119  
G G GA V+ S + GL  
Sbjct 171125 VGATGLGATGATGVFGSTGATGL 171193

Score = 37.0 bits (84), Expect = 0.076, Method: Compositional matrix adjust.  
Identities = 36/104 (35%), Positives = 46/104 (44%), Gaps = 3/104 (3%)  
Frame = +2

Query 32 PKGACTGWMAGIPGHHPGHNGAPGRDGRDGTTPGEKGEKGDPLIGPKGDIGETGVPGAEGP 91  
P+GA G+ G G G G G G G G G IG G IG TG G +GP  
Sbjct 13430 PQGATGSGATGVRGATGEQGLTGPDGP--GATGATGPQGFIGATG-IGATGATGIQGP 13600

Query 92 RGFPGIQGRKGEPEGAYVYRSAFVSFVGLVETVYVTPNMPPIRFTKI 135

+G G+QG +G+ GA + T +T P P T +  
Sbjct 13601 QGATGVQGPQGDSITGATGPFPGGLPGATGLTGPTGPQGATGV 13732

>NC\_020490.2 Staphylococcus phage StB12, complete genome  
Length=44714

Score = 40.0 bits (92), Expect = 0.008, Method: Compositional matrix adjust.  
Identities = 26/55 (47%), Positives = 29/55 (53%), Gaps = 0/55 (0%)  
Frame = +3

Query 42 GIPGHPGHNGAPGRDGRDGTPEKGEKGDPLIGPKGDIGETGVPGAEGPRGFPG 96  
G G G G G G DG GE G G G +GPKGD GE G+ G +GP G G  
Sbjct 39999 GDKDIGPQGPKGDRGADGVDGEIGPAGPAGPMPGPKGDTGEKGLQGEQGPFGKDG 40163

Score = 39.7 bits (91), Expect = 0.010, Method: Compositional matrix adjust.  
Identities = 25/44 (57%), Positives = 27/44 (61%), Gaps = 0/44 (0%)  
Frame = +3

Query 63 GEKGEKGDPLIGPKGDIGETGVPGAEGPRGFPGIQGRKGEPE 106  
G KG+KGD G GPKGD G GV G GP G G G KG+ GE  
Sbjct 39990 GPKGDKDIGPQGPKGDRGADGVDGEIGPAGPAGPMPGPKGDTGE 40121

>NC\_024354.1 Cronobacter phage CR8, complete genome  
Length=149162

Score = 40.0 bits (92), Expect = 0.008, Method: Compositional matrix adjust.  
Identities = 37/132 (28%), Positives = 57/132 (43%), Gaps = 15/132 (11%)  
Frame = +2

Query 48 GHNGAPGRDGRDGTPEKGEKGDPLIGPKGDIGETGVPGAEGPRGFPGIQGRKGEPEG 107  
G G G+ G G GEKGEKGD G +GP G G +G +G PG G KG+ G+  
Sbjct 12125 GLQGPQGRGIQGVQGEKGEKGDQGPVGPAGPAGP-----QGEQGPGETGPKGDKGDN 12286

Query 108 AY-----VYRSAFSVGLETYVTIPNMPPIRFTKIFYNQQNHYDGSTGKFHCNIPGLYY--- 159  
A +Y S + +++ +P + ++ + N + F +  
Sbjct 12287 ALPTISGIYASPINK-TNSWIQLPGNNLGNVRLILSANNKVSQTRVGFSAAGTSSVAKRIG 12463

Query 160 FAYHITVYMKDV 171  
F+Y +T DV  
Sbjct 12464 FSYALTTTYTDV 12499

Score = 37.7 bits (86), Expect = 0.044, Method: Compositional matrix adjust.  
Identities = 30/71 (42%), Positives = 35/71 (49%), Gaps = 21/71 (30%)  
Frame = +2

Query 57 GRDGTPEKGEKGDPLIGPKG-----DIGETGVPGAEGPRGFPG 95  
G G GEKG+KGDPG GP+G ++GETG G +GP G  
Sbjct 11519 GPQGPQGEKGDGDPGPQGPQGVQGAPGNPGEKGPQGGQGPQGEVGETGPGQGPQGPVGPPT 11698

Query 96 GIQGRKGEPE 106  
G QG KGE GE  
Sbjct 11699 GPQGEKGERGE 11731



Score = 37.0 bits (84), Expect = 0.082, Method: Compositional matrix adjust.  
Identities = 30/65 (46%), Positives = 33/65 (51%), Gaps = 0/65 (0%)  
Frame = +2

Query 42 GIPGHPGHNGAPGRDGRDGTPEKGEKGDPLIGPKGDIGETGVPGAEGPRGFPGIQGRK 101  
G PG G G G G G G G G GP G GE G G +GP+G GIQG +  
Sbjct 11990 GAPGPVGPAGPTGPQGLQGPVGPAGPSGATGPAGPAGPQGEQQPQGLQGPQGRGIQGVQ 12169

Query 102 GEPGE 106  
GE GE  
Sbjct 12170 GEKGE 12184

>NC\_020205.1 Xanthomonas citri phage CP2 DNA, complete genome  
Length=42963

Score = 40.0 bits (92), Expect = 0.008, Method: Compositional matrix adjust.  
Identities = 29/68 (43%), Positives = 34/68 (50%), Gaps = 0/68 (0%)  
Frame = -1

Query 48 GHNGAPGRDGRDGTPEKGEKGDPLIGPKGDIGETGVPGAEGPRGFPGIQGRKGEPEG 107  
G G PG G G G +G KGD G GP G G TG GA+G +G G QG KG+ G  
Sbjct 3258 GERGFPGVAGPQGVGPQGPQKGDGTGATGPAGAKGATGATGAQGAQGTQGPQGAQKGDGTGAT 3079

Query 108 AYVYRSFAF 115  
+ A  
Sbjct 3078 GPSAKVAL 3055

>NC\_018270.1 Weissella phage phiYS61, complete genome  
Length=33594

Score = 40.0 bits (92), Expect = 0.008, Method: Compositional matrix adjust.  
Identities = 23/44 (52%), Positives = 29/44 (66%), Gaps = 0/44 (0%)  
Frame = +2

Query 60 GTPGEKGEKGDPLIGPKGDIGETGVPGAEGPRGFPGIQGRKGE 103  
G G KG+KGD G GPKGD G+TG G +G +G G QG +G+  
Sbjct 20621 GPQGSKGDKGDGTGPQGPQKGDKGDGTGPQGPQKGDKGDGTGPQGERGK 20752

>NC\_018851.1 Propionibacterium phage ATCC29399B\_C, complete genome  
Length=29516

Score = 40.0 bits (92), Expect = 0.009, Method: Compositional matrix adjust.  
Identities = 34/78 (44%), Positives = 41/78 (53%), Gaps = 9/78 (12%)  
Frame = +3

Query 40 MAGIPGHPGHNGAPGRDGRDGTPEKGEKGDPLIGPKGDIGETGVPGAEGPRGFPGIQG 99  
+AG G G NG G DGRDG+ GE+G G G GP+G GE G +GP G G G  
Sbjct 15012 VAGRAGADGVNGVDGADGRDGSAGERGAVGPSGPEGPQGTQGER---GEQGPAGANGSDG 15182

Query 100 RKGEPGEGAYVYRSFAFSV 117  
+ G+ G RS SV  
Sbjct 15183 KDGKDG-----RSVVSV 15218

>NC\_018847.1 Propionibacterium phage ATCC29399B\_T, complete genome

Length=29516

Score = 40.0 bits (92), Expect = 0.009, Method: Compositional matrix adjust.  
Identities = 34/78 (44%), Positives = 41/78 (53%), Gaps = 9/78 (12%)  
Frame = +3

```
Query 40      MAGIPGHPGHNGAPGRDGRDGTPEKEKKGDPGLIGPKGDIGETGVPGAEGPRGFPIQG 99
           +AG G G NG G DGRDG+ GE+G G G GP+G GE G +GP G G G
Sbjct 15012   VAGRAGADGVNGVDGADGRDGSAGERGAVGSPGPEGPQGTQGER---GEQGPAGANGSDG 15182

Query 100     RKGEPGEGAYVYRSAFSV 117
           + G+ G RS SV
Sbjct 15183   KDGKDG-----RSVVSV 15218
```

>NC\_030901.1 *Gordonia* phage ClubL, complete genome  
Length=92618

Score = 40.0 bits (92), Expect = 0.009, Method: Compositional matrix adjust.  
Identities = 33/87 (38%), Positives = 44/87 (51%), Gaps = 15/87 (17%)  
Frame = +1

```
Query 37      TGWMAGIPGHPGHNGAPGRDGRDGTPEKEKKGDPGLIGPKGDIGETGVPGAEGPRGFPG 96
           T +PG PG G+ DG G G+KG+ G+ GL G KGD +G +G G
Sbjct 37960   TALFVPVPGMPGPRGS---DGDQGPKGDKGDPGERGLQGLKGD-----QGTKGDKG 38103

Query 97      IQGRKGPGEAYVYRSAFSVGLLETIV 123
           QG +G PGE V + + GL+T V
Sbjct 38104   DQGNQGPPE---VSLAQLNSGLDTKV 38175
```

>NC\_030696.1 *Gordonia* phage Smoothie, complete genome  
Length=93139

Score = 40.0 bits (92), Expect = 0.009, Method: Compositional matrix adjust.  
Identities = 33/87 (38%), Positives = 44/87 (51%), Gaps = 15/87 (17%)  
Frame = +3

```
Query 37      TGWMAGIPGHPGHNGAPGRDGRDGTPEKEKKGDPGLIGPKGDIGETGVPGAEGPRGFPG 96
           T +PG PG G+ DG G G+KG+ G+ GL G KGD +G +G G
Sbjct 38499   TALFVPVPGMPGPRGS---DGDQGPKGDKGDPGERGLQGLKGD-----QGTKGDKG 38642

Query 97      IQGRKGPGEAYVYRSAFSVGLLETIV 123
           QG +G PGE V + + GL+T V
Sbjct 38643   DQGNQGPPE---VSLAQLNSGLDTKV 38714
```

>NC\_031029.1 *Gordonia* phage Cucurbita, complete genome  
Length=93686

Score = 40.0 bits (92), Expect = 0.009, Method: Compositional matrix adjust.  
Identities = 33/87 (38%), Positives = 44/87 (51%), Gaps = 15/87 (17%)  
Frame = +3

```
Query 37      TGWMAGIPGHPGHNGAPGRDGRDGTPEKEKKGDPGLIGPKGDIGETGVPGAEGPRGFPG 96
           T +PG PG G+ DG G G+KG+ G+ GL G KGD +G +G G
Sbjct 39330   TALFVPVPGMPGPRGS---DGDQGPKGDKGDPGERGLQGLKGD-----QGTKGDKG 39473
```

Query 97 IQGRKGEPEGEGAYVYRSAFSVGLLETIV 123  
QG +G PGE V + + GL+T V  
Sbjct 39474 DQGNQGPPE---VSLAQLNSGLDTKV 39545

>NC\_030936.1 Gordonia phage Bachita, complete genome  
Length=93843

Score = 40.0 bits (92), Expect = 0.009, Method: Compositional matrix adjust.  
Identities = 33/87 (38%), Positives = 44/87 (51%), Gaps = 15/87 (17%)  
Frame = +2

Query 37 TGWMAGIPGHPGHNGAPGRDGRDGTTPGEKGEKGDPLIGPKGDIGETGVPGAEGPRGFPG 96  
T +PG PG G+ DG G G+KG+ G+ GL G KGD +G +G G  
Sbjct 38471 TALFVVPVPGMPGPRGS---DGDQGPKGDKGDPGERGLQGLKGD-----QGTKGDKG 38614

Query 97 IQGRKGEPEGEGAYVYRSAFSVGLLETIV 123  
QG +G PGE V + + GL+T V  
Sbjct 38615 DQGNQGPPE---VSLAQLNSGLDTKV 38686

>NC\_023731.1 Mycobacterium phage Trixie, complete genome  
Length=53526

Score = 39.7 bits (91), Expect = 0.011, Method: Compositional matrix adjust.  
Identities = 30/61 (49%), Positives = 34/61 (56%), Gaps = 6/61 (10%)  
Frame = +3

Query 48 GHNGAPGRDGRDGTTPGEKGEKGDPLIGPKGDIGET-----GVPGAEGPRGFPGIQGRK 101  
G G G G G G KG+KGD G GPKGD G T GV GA+GP+G G QG +  
Sbjct 4740 GPQGVQGPKGDTGATGAKGDKGDTGAQGPKGDTGATGPAGRDGVDGAQGPKGDTGFPQGD 4919

Query 102 G 102  
G  
Sbjct 4920 G 4922

Score = 38.9 bits (89), Expect = 0.018, Method: Compositional matrix adjust.  
Identities = 41/97 (42%), Positives = 45/97 (46%), Gaps = 6/97 (6%)  
Frame = +3

Query 19 ETTTQGP-GVLLPLPKGACTGWMA-----GIPGHPGHNGAPGRDGRDGTTPGEKGEKGDPG 72  
ET QGP GV P TG G G G GA G GRDG G +G KGD G  
Sbjct 4725 ETGLQGPQGVQGPKGDTGATGAKGDKGDTGAQGPKGDTGATGPAGRDGVDGAQGPKGDTG 4904

Query 73 LIGPKGDIGETGVPGAEGPRGFPGIQGRKGEPEGAY 109  
G +G G TG G+ GP G G G +G G AY  
Sbjct 4905 PQGDEGPQGPPTGATGSRGPEGPQGPPTGERGPMGYSAY 5015

>NC\_007734.1 Bacillus phage WBeta, complete genome  
Length=40867

Score = 39.7 bits (91), Expect = 0.011, Method: Compositional matrix adjust.  
Identities = 26/56 (46%), Positives = 32/56 (57%), Gaps = 0/56 (0%)  
Frame = +1

Query 48 GHNGAPGRDGRDGTTPGEKGEKGDPLIGPKGDIGETGVPGAEGPRGFPGIQGRKGE 103

Sbjct 33670 G G G G G G +G +G PG+ GP G IG TG+ G +G +GFPGI G G  
GIQGVQGNP GTTGPQGIQGIQGIQIPGVSGPIGPIGPTGIQGVQGIQGFPGIPGPMGP 33837

Score = 38.5 bits (88), Expect = 0.027, Method: Compositional matrix adjust.  
Identities = 28/64 (44%), Positives = 35/64 (55%), Gaps = 0/64 (0%)  
Frame = +1

Query 40 MAGIPGHPGHNGAPGRDGRDGTPEKGEKGDPLIGPKGDIGETGVPGAEGPRGFPGIQG 99  
+ GIPG PG G G G G G +G +G+PG GP G G TG+ G +G +G GI G  
Sbjct 34231 LQGIPGIPGSMGPTGLTGPTGLQGIQGIQGNPPTGPFPGPTGPTGLQGIQGLQGIQGIPIG 34410  
Query 100 RKGE 103  
G  
Sbjct 34411 PTGP 34422

>NC\_027627.1 Propionibacterium phage Solid, complete genome  
Length=29440

Score = 39.7 bits (91), Expect = 0.012, Method: Compositional matrix adjust.  
Identities = 35/87 (40%), Positives = 40/87 (46%), Gaps = 15/87 (17%)  
Frame = +3

Query 40 MAGIPGHPGHNGAPGR-----DGRDGTPEKGEKGDPLIGPKGDIGETGVPGAEG 90  
+ G+ G GHNG PGR DG DG G GE+GD G GP G G G G  
Sbjct 14976 LPGVNGSDGHNGVPGRAGADGVNVDGADGRNGSAGERGDVGPSPGAGPQGAQCERGERG 15155  
Query 91 PRGFPGIQGRKGEPEGAYVYRSAFSV 117  
P G G G+ G+ G RS SV  
Sbjct 15156 PVGANGSDGKDGKDG-----RSVSV 15218

>NC\_027623.1 Propionibacterium phage Pirate, complete genome  
Length=29328

Score = 39.3 bits (90), Expect = 0.013, Method: Compositional matrix adjust.  
Identities = 26/64 (41%), Positives = 33/64 (52%), Gaps = 0/64 (0%)  
Frame = +1

Query 43 IPGHPGHNGAPGRDGRDGTPEKGEKGDPLIGPKGDIGETGVPGAEGPRGFPGIQGRKG 102  
+ G PG G G G G G+ G G G++GP G G G+ G +GP G PG G G  
Sbjct 14833 VQGVPGPAGVVRGPQGPAGADGKDGSDGNSAGVVGVPVGPQGSPLNGVKGPDGLPGANGSDG 15012  
Query 103 EPGE 106  
E G+  
Sbjct 15013 ERGD 15024

Score = 38.1 bits (87), Expect = 0.035, Method: Compositional matrix adjust.  
Identities = 32/77 (42%), Positives = 37/77 (48%), Gaps = 12/77 (16%)  
Frame = +1

Query 41 AGIPGHPGHNGAPGRDGRDGT-----PGEKGEKGDPLIGPKGDIGETGVPGA 88  
AG+ G G GA G+DG +G+ PG G KG GL G G GE G G  
Sbjct 14854 AGVRGPQGPAGADGKDGSDGNSAGVVGVPVGPQGSPLNGVKGPDGLPGANGSDGERGDVGP 15033  
Query 89 EGPRGFPGIQGRKGEPEG 105

GP G G QG +GE G  
Sbjct 15034 SGPAGLQGAQGERGERG 15084

>NC\_004682.1 Mycobacterium phage Bxz2, complete genome  
Length=50913

Score = 39.3 bits (90), Expect = 0.013, Method: Compositional matrix adjust.  
Identities = 29/57 (51%), Positives = 34/57 (60%), Gaps = 0/57 (0%)  
Frame = +3

Query 48 GHNGAPGRDGRDGTPEKKEKGDPLIGPKGDIGETGVPGAEGPRGFPGIQRKGE 104  
G G G G G G+KG+KGD G GPKGD G+ G GA+GP+G G QG G P  
Sbjct 2454 GPKGDTGATGAQGPKGDKGDKGDTGDTGPKGDKGDKGDTGAQGPQGIQGPQGPAGVP 2624

>NC\_031084.1 Propionibacterium phage BruceLethal, complete genome  
Length=29249

Score = 39.3 bits (90), Expect = 0.013, Method: Compositional matrix adjust.  
Identities = 31/85 (36%), Positives = 40/85 (47%), Gaps = 9/85 (11%)  
Frame = +1

Query 45 GHPGHNGAPGRDGRD-----TPGEKKEKGDPLIGPKGDIGETGVPGAEGPRGFPGIQ 98  
G GH+G PGR G DG T G G G+ G +GP G G GV +G RG G+  
Sbjct 14980 GKDGHDGVPGRAGADGVKGVDTGDRDGSAGERGAVGPSGPAGPQGV---QGERGAAGVN 15150

Query 99 GRKGEPGEGAYVYRSFAFSVGLETYV 123  
G G+ G+ S + G +V  
Sbjct 15151 GSDGKDKGDRSVVSVYCSGGRLFV 15225

Score = 37.4 bits (85), Expect = 0.054, Method: Compositional matrix adjust.  
Identities = 28/66 (42%), Positives = 34/66 (52%), Gaps = 0/66 (0%)  
Frame = +1

Query 40 MAGIPGHPGHNGAPGRDGRDGTPEKKEKGDPLIGPKGDIGETGVPGAEGPRGFPGIQQ 99  
+AG+PG G G G G DG G G G G+GP+G G GV G +G G G+ G  
Sbjct 14830 VAGVPGPAGERGPQGPAGADGRAGHDGSAGLVGPVGPQGSPLNGVKGPDKGDGHDGVP 15009

Query 100 RKGEPP 105  
R G G  
Sbjct 15010 RAGADG 15027

>AC\_000012.1 Murine adenovirus A, complete genome  
Length=30944

Score = 39.3 bits (90), Expect = 0.014, Method: Compositional matrix adjust.  
Identities = 35/115 (30%), Positives = 49/115 (43%), Gaps = 9/115 (8%)  
Frame = -2

Query 40 MAGIPGHPGHNGAPGRDGRDGTPEKKEKGDPLIGPKGDIGETGVPGAEGPRGFPGIQQ 99  
+ G+PG G G PG G G PG+ G G P GD+G GVP G G PG G  
Sbjct 30055 LGGVPGDMGLGGVPGDMGLGGVPGDMGLGGVP-----GDMGLGGVPGDMGLGGVPGNIG 29894

Query 100 RKGEPPGEGAYVYRSFAFSVGLETYVTIPNMPIRFTKIFYNQQNHYDGSTGKFHCNI 154  
+ PG R + E + + + + F++ Q+ Y G C +

Sbjct 29893 SR--PGNTWRCAREHWQSSREHWQS-SRKHLAACQGFHQLQSLYIKLCGLLKCIL 29738

>NC\_000942.1 Murine adenovirus A, complete genome  
Length=30944

Score = 39.3 bits (90), Expect = 0.014, Method: Compositional matrix adjust.  
Identities = 35/115 (30%), Positives = 49/115 (43%), Gaps = 9/115 (8%)  
Frame = -2

Query 40 MAGIPGHPGHNGAPGRDGRDGTPEKGEKGDPLIGPKGDIGETGVPGAEGPRGFPGIQG 99  
+ G+PG G G PG G G PG+ G G P GD+G GVP G G PG G  
Sbjct 30055 LGGVPGDMGLGGVPGDMGLGGVPGDMGLGGVP-----GDMGLGGVPGDMGLGGVPGNIG 29894

Query 100 RKGEPEGAYVYRSFAFSVGLETYVTIPNMPIRFTKIFYNQQNHYDGSTGKFHCNI 154  
+ PG R + E + + + F++ Q+ Y G C +  
Sbjct 29893 SR--PGNTWRCAREHWQSSREHWQS-SRKHLAACQGFHQLQSLYIKLCGLLKCIL 29738

>NC\_027361.1 Propionibacterium phage PHL085N00, complete genome  
Length=29454

Score = 39.3 bits (90), Expect = 0.016, Method: Compositional matrix adjust.  
Identities = 33/76 (43%), Positives = 41/76 (54%), Gaps = 12/76 (16%)  
Frame = +1

Query 42 GIPGHPGHNGAPGRDGRDGTPEKGEKGDPLIGPKGDIGETGVPGAEGPRGFPGIQGRK 101  
G+PG G +GA DGRDG+ GE+G+ G G GP+G GE G GP G G G+  
Sbjct 15028 GVPGRAGVDGA---DGRDGSAGERGDVGPSPAGPQGAQGER---GERGPVANGSDGKD 15189

Query 102 GEPGEGAYVYRSFAFSV 117  
G+ G RS SV  
Sbjct 15190 GKDG-----RSVSV 15219

Score = 37.7 bits (86), Expect = 0.040, Method: Compositional matrix adjust.  
Identities = 27/63 (43%), Positives = 34/63 (54%), Gaps = 0/63 (0%)  
Frame = +1

Query 40 MAGIPGHPGHNGAPGRDGRDGTPEKGEKGDPLIGPKGDIGETGVPGAEGPRGFPGIQG 99  
+ G+ G G GA G DGRDG PG G G G G G+ G+ G G GP+G G +G  
Sbjct 14968 LNGVKGPDLPGANGSDGRDGVPRAGVDGADGRDGSAGERGDVGPSPAGPQGAQGERG 15147

Query 100 RKG 102  
+G  
Sbjct 15148 ERG 15156

>NC\_028798.1 Mycobacterium phage MarQuardt, complete genome  
Length=50882

Score = 39.3 bits (90), Expect = 0.016, Method: Compositional matrix adjust.  
Identities = 29/59 (49%), Positives = 34/59 (58%), Gaps = 0/59 (0%)  
Frame = +1

Query 48 GHNGAPGRDGRDGTPEKGEKGDPLIGPKGDIGETGVPGAEGPRGFPGIQGRKGEPGE 106  
G G PG G G G G +GDPG GPKGD G+TG G +G G G QG KG+ G+  
Sbjct 2335 GDAGNPGPTGPQGDIGPAGPQGDGPGPQGPKGDTGDTGPQPKGDTGATGAQGPKGDKGD 2511

Score = 38.5 bits (88), Expect = 0.023, Method: Compositional matrix adjust.  
Identities = 30/62 (48%), Positives = 36/62 (58%), Gaps = 0/62 (0%)  
Frame = +1

```
Query 41 AGIPGHPGHNGAPGRDGRDGTTPGEKGEKGDPLIGPKGDIGETGVPGAEGPRGFPGIQGR 100
          AG PG G G G G G PG +G KGD G GP+G G+TG GA+GP+G G +G
Sbjct 2341 AGNPGPTGPQGDIGPAGPQGDPPGQPKGDTGDTGPQPKGDTGATGAQGPKGDKGDKGD 2520

Query 101 KG 102
          G
Sbjct 2521 TG 2526
```

Score = 37.7 bits (86), Expect = 0.041, Method: Compositional matrix adjust.  
Identities = 34/79 (43%), Positives = 42/79 (53%), Gaps = 1/79 (1%)  
Frame = +1

```
Query 41 AGIPGHPGHNGAPGRDGRDGTTPGEKGEKGDPLIGPKGDIGETGVPGAEGPRGFPGIQGR 100
          AG G PG G G G G G KG+ G G GPKGD G+ G G GP+G G +G
Sbjct 2386 AGPQGDPPGQPKGDTGDTGPQPKGDTGATGAQGPKGDKGDKGDTGNTGPQGLQGPKGD 2565

Query 101 KGEPGE-GAYVYRSAFSVG 118
          KG+ G GA ++ S+G
Sbjct 2566 KGDTGATGATGPANSLSIG 2622
```

>NC\_015463.1 *Synechococcus* phage S-CBS2, complete genome  
Length=72332

Score = 38.9 bits (89), Expect = 0.019, Method: Compositional matrix adjust.  
Identities = 25/58 (43%), Positives = 32/58 (55%), Gaps = 0/58 (0%)  
Frame = +2

```
Query 48 GHNGAPGRDGRDGTTPGEKGEKGDPLIGPKGDIGETGVPGAEGPRGFPGIQGRKGEPG 105
          G G G G G GE G +G+ G+ GP+G GE G+ G +G +G GIQG G G
Sbjct 39422 GPQGEQGIQGPQGIQGEPIQGEQGIQGPQGIQGEPIQGEQGIQGEQGIQGETGPAG 39595
```

Score = 37.4 bits (85), Expect = 0.064, Method: Compositional matrix adjust.  
Identities = 24/52 (46%), Positives = 28/52 (54%), Gaps = 0/52 (0%)  
Frame = +2

```
Query 42 GIPGHPGHNGAPGRDGRDGTTPGEKGEKGDPLIGPKGDIGETGVPGAEGPRG 93
          GI G PG G G G G GE G +G+ G+ G +G GETG G GP G
Sbjct 39458 GIQGEPIQGEQGIQGPQGIQGEPIQGEQGIQGEQGIQGETGPAGPTGPAG 39613
```

>NC\_027346.1 *Propionibacterium* phage PHL171M01, complete genome  
Length=29327

Score = 38.9 bits (89), Expect = 0.021, Method: Compositional matrix adjust.  
Identities = 30/67 (45%), Positives = 34/67 (51%), Gaps = 0/67 (0%)  
Frame = +1

```
Query 40 MAGIPGHPGHNGAPGRDGRDGTTPGEKGEKGDPLIGPKGDIGETGVPGAEGPRGFPGIQG 99
          + G+PG G G G G DG G G G G +GP+G G GV G EG G GI G
```

Sbjct 14848 VQGVPGPAGERGPQGPAGADGRDGVNGSAGIVGPFVGPQGSPLNGVKGPEGLPGSDGING 15027  
Query 100 RKGEPGE 106  
R G PG  
Sbjct 15028 RDGVPGR 15048

>NC\_024793.1 Escherichia phage bV\_EcoS\_AHP42, complete genome  
Length=46847

Score = 38.5 bits (88), Expect = 0.022, Method: Compositional matrix adjust.  
Identities = 25/58 (43%), Positives = 34/58 (59%), Gaps = 6/58 (10%)  
Frame = +2

Query 48 GHNGAPGRDGRDGTPEKKEKGDPLIGPKGDIGETGVPGAEGPRGFPGIQGRKGEFG 105  
G G GRDG G G +G +G+ G GP+G+ G+T GP+G G +G KG+PG  
Sbjct 6695 GFKGTTGRDGMAGPQGPQGPQPRGEVGPQGPQGEKGD-----GPQGLKGDKGDKGDPG 6850

>NC\_020883.1 Bacillus phage PM1 DNA, complete genome  
Length=50861

Score = 38.5 bits (88), Expect = 0.022, Method: Compositional matrix adjust.  
Identities = 26/64 (41%), Positives = 34/64 (53%), Gaps = 6/64 (9%)  
Frame = +1

Query 34 GACTGWMAGIPGHPGHNGAPGRDGRDGTPEKKEKGDPLIGPKGDIGETGVPGAEGPRG 93  
G T W+A + G G G+ G G KG+KGD G GP+G G+ G G +GP G  
Sbjct 34039 GTETEWLASLKGPKGDTGSTGPQG-----PKGDKGDTGATGPQGPQKDKGDTGPPQGPAG 34200

Query 94 FPGI 97  
PG+  
Sbjct 34201 KPGV 34212

>NC\_028957.1 Enterobacteria phage vB\_EcoM\_VR26, complete genome  
Length=171541

Score = 38.5 bits (88), Expect = 0.023, Method: Compositional matrix adjust.  
Identities = 30/66 (45%), Positives = 36/66 (55%), Gaps = 3/66 (5%)  
Frame = +3

Query 40 MAGIPGHPGHNGAPGRDGRDGTPEKKEKGDPLIGPKGDIGETGV---PGAEGPRGFPG 96  
+ GI G PG NG G G G G +G KGD G G KGD G G+ G +GP+G G  
Sbjct 109581 LTGIQGEPEGENDIGPKGPIGLTGPQGPQKGDIGSKGIKGDTPQGIQGPAGPQGPQGEKG 109760

Query 97 IQGRKG 102  
+QG G  
Sbjct 109761 VQGLAG 109778

Score = 37.4 bits (85), Expect = 0.063, Method: Compositional matrix adjust.  
Identities = 25/54 (46%), Positives = 30/54 (56%), Gaps = 0/54 (0%)  
Frame = +3

Query 40 MAGIPGHPGHNGAPGRDGRDGTPEKKEKGDPLIGPKGDIGETGVPGAEGPRG 93  
+ G+ G G G G G G G +G G PGL GP+G G TG GA+GPRG  
Sbjct 110223 IQGLKGETGPAGPQGIQGLKGEVGAQGPSGSPGLTGPPEGPRGLTGEAGAQQGPRG 110384



>NC\_028774.1 Klebsiella phage Sushi, complete genome  
Length=48754

Score = 38.5 bits (88), Expect = 0.024, Method: Compositional matrix adjust.  
Identities = 23/44 (52%), Positives = 28/44 (64%), Gaps = 6/44 (14%)  
Frame = +2

Query 65 KGEKGDPLIGPKGDIGETGVPGAEGPRGFPGIQGRKGEPEGGA 108  
KG+KGDPG GPKGD G+ G G +GP+ G KG+PG A  
Sbjct 6056 KGDKGDPPGQGPKGDKGDPGPQGGQGPK-----GDKGDPGTSA 6169

>NC\_019400.1 Cronobacter phage vB\_CsaM\_GAP31, complete genome  
Length=147940

Score = 38.5 bits (88), Expect = 0.024, Method: Compositional matrix adjust.  
Identities = 26/56 (46%), Positives = 32/56 (57%), Gaps = 2/56 (4%)  
Frame = +1

Query 45 GHPGHNGAPGRDGRDGTPEKGEKGDPLIGPKGDIGETGVPGAEGPRGF--PGIQ 98  
G G G G DG G G G +G G IGPKGD G+TG+ G GP+G PG++  
Sbjct 100777 GQKGDQGPPIGPDGATGPAGADGPPQGIQGPPIGPKGDKGDTGLTGPVGPQGGEMGPGVE 100944

>NC\_024141.1 Mycobacterium phage Kamy, complete genome  
Length=51378

Score = 38.5 bits (88), Expect = 0.027, Method: Compositional matrix adjust.  
Identities = 35/118 (30%), Positives = 52/118 (44%), Gaps = 23/118 (19%)  
Frame = +2

Query 63 GEKGEKGDPLIGPKGDIGETGVPGAEGPRGFPGIQGRKGEPEGAYVYRSAFSVGLETY 122  
G+ G +G GL GPKGD G+ G G++GP+G G QG +G +G Y Y S+ + L+  
Sbjct 2471 GDLGPQGPQGLQGPKGDKGDKGDTGSQGPQGIQGPQGIQGP--QGPYGYLSSDATVLDLFR 2644

Query 123 VTIPNMPPIRFTKIFYNQQNHYDGSTGKFHCNIPGLYYFAY---HITVYMKDVKVSLFK 177  
R T+ YN P ++ H+ V + D S F+  
Sbjct 2645 -----RMTQAQYN-----ALGAGRPATTFYVIVG\*HMPVIRIGDATPSGFR 2764

>NC\_022990.1 Zamilon virophage complete genome  
Length=17276

Score = 38.5 bits (88), Expect = 0.027, Method: Compositional matrix adjust.  
Identities = 34/96 (35%), Positives = 48/96 (50%), Gaps = 7/96 (7%)  
Frame = -2

Query 41 AGIPGHPGHNGAPGRDGRDGTPEKGEKGDPLIGPKGDIGETGVPGAEGPRGFPGIQGR 100  
AG+ G G G+ G G G+ G+KG KGD G+ G KG+ G G +G +G G G  
Sbjct 13942 AGLDGLKGDIGSNGLKGDGPGS-GDKGLKGDAGINGLKGDTGS----GDKGLKGDGTGNGL 13778

Query 101 KGEPGEGAYVYRSAFSVGLETYVTIPNMPPIRFTKIF 136  
KG G+ +V L + + P + FT+IF  
Sbjct 13777 KGNLGDKGLKGDVGSAAVVLSSGIWTP--TVSFTQIF 13676

Score = 37.0 bits (84), Expect = 0.075, Method: Compositional matrix adjust.  
Identities = 50/180 (28%), Positives = 72/180 (40%), Gaps = 33/180 (18%)  
Frame = -3

```
Query 60      GTPGEKGEKGDPLIGPKGDIGETGV--PGAEGPRGFPGIQGRKGEPEGEGAYVYRSAFSV 117
              G+ G KG+KGDPG G KGD G+ GV G GP+G G G G G Y FS
Sbjct 13143   GSSGPKGDKGDPGTNGLKGDIGVGIKEMGPKGNTG-----GTVGSGTY-----FSG 12994

Query 118     GLETYVT-----IPNMP---IRF-TKIFYNQNHYDG-----STGKFHCNIPGLYYFA 161
              L TY T IP + + F TK ++ DG T F+ + Y
Sbjct 12993   DLPTYETSGGTQASISPEVSTGTVAFTTKTLGGNCSYVDGVFTTTTETAPFYVAVT---YIG 12823

Query 162     YHITVYMKDVKVSLFKKDKAMLFTYDQYQENNVDQASGSV--LLHLEVGDQVWLQVYGE 219
              I + +S+FK ++ Q S S+ ++ + D +++ G
Sbjct 12822   TSIGTLDGSLIISIFKNGGTAVYNTAVIYSGAGIQMSASLNIGIIDMTSPDNIFIAFANS 12643
```

>NC\_023562.1 Mycobacterium phage BellusTerra, complete genome  
Length=51236

Score = 38.5 bits (88), Expect = 0.028, Method: Compositional matrix adjust.  
Identities = 35/118 (30%), Positives = 52/118 (44%), Gaps = 23/118 (19%)  
Frame = +1

```
Query 63      GEKGEKGDPLIGPKGDIGETGVPGAEGPRGFPGIQGRKGEPEGEGAYVYRSAFSVGL 122
              G+ G +G GL GPKGD G+ G G++GP+G G QG +G +G Y Y S+ + L+
Sbjct 2470     GDLGPQGPQGLQGPKGDKGDKGDTGSQGPQGIQGPQGIQGP--QGPYGYLSSDATVLD 2643

Query 123     VTIPNMPPIRFTKIFYNQNHYDGSTGKFHCNIPGLYYFAY---HITVYMKDVKVSLFK 177
              R T+ YN P ++ H+ V + D S F+
Sbjct 2644     -----RMTQAQYN-----ALGAGRPATTFYVIVG*HMPVIRIGDATPSGFR 2763
```

>NC\_018834.1 Propionibacterium phage P9.1, complete genome  
Length=29214

Score = 38.5 bits (88), Expect = 0.029, Method: Compositional matrix adjust.  
Identities = 29/65 (45%), Positives = 33/65 (51%), Gaps = 3/65 (5%)  
Frame = +1

```
Query 42      GIPGHPGH---NGAPGRDGRDGTPEKGEKGDPLIGPKGDIGETGVPGAEGPRGFPGIQ 98
              G+PG G NG G DG+DG G GE+G G GP G GE G GA G G G
Sbjct 15019   GVPGRGTGADGVNMGVAGADGKDGANGADGERGAVGSPGPAGPQGERGERGAAGVNGSD 15198

Query 99      GRKGE 103
              G+ G
Sbjct 15199   GKDGR 15213
```

Score = 37.0 bits (84), Expect = 0.078, Method: Compositional matrix adjust.  
Identities = 26/63 (41%), Positives = 31/63 (49%), Gaps = 0/63 (0%)  
Frame = +1

```
Query 43      IPGHPGHNGAPGRDGRDGTPEKGEKGDPLIGPKGDIGETGVPGAEGPRGFPGIQGRK 102
              + G PG G G G G G G GL+GP G G G+ G +GP G PG+ G G
Sbjct 14833   VQGVPGPAGVRGPQGPAGVDGRDGVNMGVAGLVGVPVGPQGSPLNGVKGPDGLPGVNG 15012

Query 103     EPG 105
```

G  
Sbjct 15013 RDG 15021

>NC\_022096.1 Pseudomonas phage PaBG, complete genome  
Length=258139

Score = 38.5 bits (88), Expect = 0.029, Method: Compositional matrix adjust.  
Identities = 29/79 (37%), Positives = 38/79 (48%), Gaps = 15/79 (19%)  
Frame = +2

Query 42 GIPGHPGHNGAPGRDGR-----DGTPGEKGEKGDPLIGPKGDIGETGVP 86  
G PG G +G GRDG +G PG +G G G+ GP+G G +G  
Sbjct 197042 GNP GKDGQDGRDGRDGADGDPGCPGDPGPPGDEGYPGAEGNPGLIGIQGPEGCEGASGDR 197221

Query 87 GAEGPRGFPGIQGRKGEPG 105  
G GP+G PG +G +G G  
Sbjct 197222 GLVGPQGRPGFEGSRGLTG 197278

>NC\_023719.1 Bacillus phage G, complete genome  
Length=497513

Score = 38.1 bits (87), Expect = 0.030, Method: Compositional matrix adjust.  
Identities = 26/56 (46%), Positives = 32/56 (57%), Gaps = 3/56 (5%)  
Frame = +2

Query 45 GHPGHNGAPGRDGRDGTTPGEKGEKGDPG---LIGPKGDIGETGVPGAEGPRGFPGI 97  
G G GA G G G G +G KGDPG + G KGD G+ G GA+G +G PG+  
Sbjct 135008 GPKGDTGAQGIQGPKGDTGSQGLKGDPGAQGIQGVKGDKGDQGTAGAKGDKGDPGV 135175

Score = 37.0 bits (84), Expect = 0.080, Method: Compositional matrix adjust.  
Identities = 28/77 (36%), Positives = 33/77 (43%), Gaps = 5/77 (6%)  
Frame = +2

Query 40 MAGIPGHPGHNGAPGRDGRDGTTPGEKGEKGDPLIGPKGDIGETGVPGAEGPRGFPGIQG 99  
+ G G G G G G G G KG+KGD G G KGD G+ GVP G G  
Sbjct 135038 IQGPKGDTGSQGLKGDPGAQGIQGVKGDKGDQGTAGAKGDKGDPGVPLLAGATG-----A 135202

Query 100 RKGEPGEGAYVYRSAFE 116  
R P +G Y +  
Sbjct 135203 RPSSPAKGQMFYDETLA 135253

>NC\_023565.1 Mycobacterium phage Nyxis, complete genome  
Length=51250

Score = 38.1 bits (87), Expect = 0.032, Method: Compositional matrix adjust.  
Identities = 35/118 (30%), Positives = 52/118 (44%), Gaps = 23/118 (19%)  
Frame = +1

Query 63 GEKGEKGDPLIGPKGDIGETGVPGAEGPRGFPGIQGRKGEPGEGAYVYRSAFEVGLETY 122  
G+ G +G GL GPKGD G+ G G++GP+G G QG +G +G Y Y S+ + L+  
Sbjct 2473 GDLGPQGPQGLQGPKGDKGDKGDTGSQGPQGIQGPQGIQGP--QGPYGYLSSDATVLDLFR 2646

Query 123 VTIPNMPIRFTKIFYNQNHYDGSTGKGFHCNIPGLYYFAY---HITVYMKDVKVSLFK 177  
R T+ YN P ++ H+ V + D S F+

Sbjct 2647 -----RMTQAQYN-----ALGAGRPATTFYVIVG\*HMPVRIGDATPSGFR 2766

>NC\_028925.1 Enterobacteria phage vB\_EcoM\_VR25, complete genome  
Length=170822

Score = 38.1 bits (87), Expect = 0.032, Method: Compositional matrix adjust.  
Identities = 29/66 (44%), Positives = 36/66 (55%), Gaps = 3/66 (5%)  
Frame = +1

Query 40 MAGIPGHPGHNGAPGRDGRDGTPEKEKEKGDPLIGPKGDIGETGV---PGAEGPRGFPG 96  
+ G+ G PG NG G G G G +G KGD G G KGD G G+ G +GP+G G  
Sbjct 109441 LTGVQGEPEGENGDIGPKGPIGLTGPQGPKGDGSKGIKGDTPQGIQGPAGPQGPQGEKG 109620

Query 97 IQGRKG 102  
+QG G  
Sbjct 109621 VQGLAG 109638

Score = 37.0 bits (84), Expect = 0.081, Method: Compositional matrix adjust.  
Identities = 25/54 (46%), Positives = 30/54 (56%), Gaps = 0/54 (0%)  
Frame = +1

Query 40 MAGIPGHPGHNGAPGRDGRDGTPEKEKEKGDPLIGPKGDIGETGVPGAEGPRG 93  
+ G+ G G G G G G +G G PGL GP+G G TG GA+GPRG  
Sbjct 110083 IQGLKGETGPAGPQGIQGLKGEVGAQGPSGSPGLTGPEGPRGLTGEAGAQQGPRG 110244

>NC\_022776.1 Streptococcus phage TP-778L complete genome  
Length=41757

Score = 38.1 bits (87), Expect = 0.033, Method: Compositional matrix adjust.  
Identities = 35/129 (27%), Positives = 52/129 (40%), Gaps = 12/129 (9%)  
Frame = +1

Query 36 CTGWMAGIPGHPGHNGAPGR---DGRDGTPEKEKEKGDPLIGPKGDIGETGVPGAEGPR 92  
+GW + +P P N + + D T G GPKGD G G+ G G +  
Sbjct 32134 TSGWSSQVPNVPE SNYLWTKTVWEYTDNTNETGYSVAKMGEQGPKGDRGIQGLQGPGRDQ 32313

Query 93 GFPGIQGRKGEPEGEGAYVYRSAFSVGLETYVTIPNMPPIRFTKIFYNQNH----YDGSTG 148  
G PG +G G +V +S G + Y+ + P F + Y + H D +T  
Sbjct 32314 GIPGPKGIDGTDAPTIFVKSYTYSAGSKAYIKLTG-PNAFEQTLYYSRGNVWVLDATTH 32490

Query 149 KF----HCN 153  
K HC+  
Sbjct 32491 KLKEFVHCD 32517

>NC\_015454.1 Propionibacterium phage PAD20 endogenous virus, complete genome  
Length=29074

Score = 37.7 bits (86), Expect = 0.042, Method: Compositional matrix adjust.  
Identities = 25/60 (42%), Positives = 30/60 (50%), Gaps = 0/60 (0%)  
Frame = +1

Query 43 IPGHPGHNGAPGRDGRDGTPEKEKEKGDPLIGPKGDIGETGVPGAEGPRGFPGIQGRKG 102  
+ G PG G G G G G G GL+GP G G G+ G +GP G PG+ G G  
Sbjct 14830 VRGVPGPAGVRGPQGPAGVDGRDGDVDSAGLVGVPQGSPLNGVKGPDLPGVNGSDG 15009

>NC\_020201.1 Pectobacterium phage phiTE, complete genome  
Length=142349

Score = 37.7 bits (86), Expect = 0.045, Method: Compositional matrix adjust.  
Identities = 30/72 (42%), Positives = 37/72 (51%), Gaps = 0/72 (0%)  
Frame = +3

```
Query 34      GACTGWMAGIPGHPGHNGAPGRDGRDGTPEKGEKGDPLIGPKGDIGETGVPGAEGPRG 93
              G G + G G G GA G G +G G +G +G G G KGD G+TG GA GP G
Sbjct 116997   GIFVGTIVKGDKGDGTGATGATGPAGPEGPPIGPQGPPEGPQGPQGEKGDGTGDTGAVGATGPAG 117176

Query 94      FPGIQGRKGEPEG 105
              G +G +G G
Sbjct 117177   AQGARGPEGPKG 117212
```

>NC\_027371.1 Propionibacterium phage Pacnes 2012-15, complete genome  
Length=29741

Score = 37.7 bits (86), Expect = 0.047, Method: Compositional matrix adjust.  
Identities = 27/66 (41%), Positives = 33/66 (50%), Gaps = 0/66 (0%)  
Frame = -1

```
Query 40      MAGIPGHPGHNGAPGRDGRDGTPEKGEKGDPLIGPKGDIGETGVPGAEGPRGFPGIQG 99
              + G+PG G G G G G G G G GL+GP G G G+ G +GP G PG G
Sbjct 14831    VQGVPGPAGVRGPQGPAGVAGVDGRNGVDGSAGLVGPGVGPQGSPLNGVKGPDGLPGSDG 14652

Query 100     RKGEPEG 105
              + G G
Sbjct 14651    KDGRDG 14634
```

>NC\_028672.1 Cronobacter phage PBES 02, complete genome  
Length=149732

Score = 37.7 bits (86), Expect = 0.047, Method: Compositional matrix adjust.  
Identities = 30/71 (42%), Positives = 35/71 (49%), Gaps = 21/71 (30%)  
Frame = +2

```
Query 57      GRDGTPEKGEKGDPLIGPKG-----DIGETGVPGAEGPRGF 95
              G G GEKG+KGDGP GP+G ++GETG G +GP G
Sbjct 65696    GPQGPQGEKGDKGDGPGPQGPQGVQGEVGPNGPGEKGPQGGQGPQGEVGETGPGQGPQGPVPT 65875

Query 96      GIQGRKGEPEG 106
              G QG KGE GE
Sbjct 65876    GPQGEKGERGE 65908
```

>NC\_018853.1 Streptomyces phage TG1, complete genome  
Length=40474

Score = 37.7 bits (86), Expect = 0.052, Method: Compositional matrix adjust.  
Identities = 29/70 (41%), Positives = 35/70 (50%), Gaps = 3/70 (4%)  
Frame = +3

```
Query 33      KGACTGWMAGIPGHPGHNGAPGRDGRDGTPEKGEKGDPLIGPKGDIGETGVPGAEGPR 92
```

```

+G+  W+A + G  G  G      G  G  G +G KGD G IGP+G  G  G  G EGP
Sbjct 14730 EGSEADWVASLEGDVGPVG---PQGPKGDTGPGQPKGDTGAIGPQGPEGAQGPAGPEGPM 14900

Query 93      GFPGIQGRKG 102
          G  G QG  G
Sbjct 14901  GPEGPQGPAG 14930

```

>NC\_013645.1 Streptococcus phage Abc2, complete genome  
Length=34882

Score = 37.4 bits (85), Expect = 0.056, Method: Compositional matrix adjust.  
Identities = 22/53 (42%), Positives = 31/53 (58%), Gaps = 0/53 (0%)  
Frame = +1

```

Query 59      DGTPGEKGEKGDPLIGPKGDIGETGVPGAEGPRGFPGIQGRKGEPGEGAYVY 111
          DG  G KG++G  G  G +G+ G  G+ G +GP+G  GI G KG  G+  Y  +
Sbjct 16423  DGKQGPKGDRGPQGPQKDRGERGLQGLRGIQGPKGQDQGIQPKGADGKTQYTH 16581

```

>NC\_015569.1 Synechococcus phage S-CRM01, complete genome  
Length=178563

Score = 37.4 bits (85), Expect = 0.058, Method: Compositional matrix adjust.  
Identities = 27/64 (42%), Positives = 31/64 (48%), Gaps = 0/64 (0%)  
Frame = +1

```

Query 42      GIPGHPGHNGAPGRDGRDGTTPGEKGEKGDPLIGPKGDIGETGVPGAEGPRGFPGIQGRK 101
          G  G  G NG  G  G  G  G +G  G  G  GP+G  G  G  G +GP+GF  G  QG
Sbjct 29047  GFQGVAGSNGTQGPQGFQGNQGSQGIAGSNGTQGPQGFQGVAGSNGTQGPQGFQGSQGIA 29226

```

```

Query 102     GEPG 105
          G  G
Sbjct 29227  GSNG 29238

```

Score = 37.0 bits (84), Expect = 0.088, Method: Compositional matrix adjust.  
Identities = 27/66 (41%), Positives = 36/66 (55%), Gaps = 0/66 (0%)  
Frame = +1

```

Query 40      MAGIPGHPGHNGAPGRDGRDGTTPGEKGEKGDPLIGPKGDIGETGVPGAEGPRGFPGIQG 99
          +AG  G  G  G  G  G +GT  G +G +G+  G  GP+G  G  G  G +GP+GF  G+  G
Sbjct 26311  VAGSNGTQGPQGFQGNAGSNGTQGPQGFQGNAGSQQGPQGFQGNAGSNGTQGPQGFQGVAG 26490

```

```

Query 100     RKGEPG 105
          G  G
Sbjct 26491  SNGTQG 26508

```

Score = 37.0 bits (84), Expect = 0.091, Method: Compositional matrix adjust.  
Identities = 28/61 (46%), Positives = 35/61 (57%), Gaps = 0/61 (0%)  
Frame = +1

```

Query 42      GIPGHPGHNGAPGRDGRDGTTPGEKGEKGDPLIGPKGDIGETGVPGAEGPRGFPGIQGRK 101
          GI G  G  G  G +G DGT  G +G  G  G  GP+G  G  G  G ++GP+GF  G  QG  +
Sbjct 25582  GINGTQGPQGFQGANIDGTQGPQGNAGSNGTQGPQGFQGVGGNNGSQGPQGFQGNQGLR 25761

```

```

Query 102     G 102

```

Sbjct 25762 G 25764

>NC\_024148.1 Mycobacterium phage Phantastic, complete genome  
Length=50101

Score = 37.4 bits (85), Expect = 0.064, Method: Compositional matrix adjust.  
Identities = 28/62 (45%), Positives = 34/62 (55%), Gaps = 0/62 (0%)  
Frame = +3

Query 42 GIPGHPGHNGAPGRDGRDGTTPGEKGEKGDPLIGPKGDIGETGVPGAEGPRGFPGIQGRK 101  
GI G G G G G +G G G +G G IGP+G GE G G +GP+G G QG +  
Sbjct 2100 GIQGPQGLQGPQGEQGPQGPVGPQGPQGEIGPQGPQGEQGPQGIQGPQGAQGPQGPQ 2279

Query 102 GE 103  
GE  
Sbjct 2280 GE 2285

>NC\_022341.1 Propionibacterium phage PHL113M01, complete genome  
Length=29200

Score = 37.0 bits (84), Expect = 0.071, Method: Compositional matrix adjust.  
Identities = 26/63 (41%), Positives = 31/63 (49%), Gaps = 0/63 (0%)  
Frame = +2

Query 43 IPGHPGHNGAPGRDGRDGTTPGEKGEKGDPLIGPKGDIGETGVPGAEGPRGFPGIQGRK 102  
+ G PG G G G G G G G GL+GP G G G+ G +GP G PG G+ G  
Sbjct 14867 VQGVPGPAGVVRGPQGPAGVDGRDGVNGSAGLVGPVGPQGSPLNGVKGPDLPGANGKDG 15046

Query 103 EPG 105  
G  
Sbjct 15047 VAG 15055

>NC\_018849.1 Propionibacterium phage P105, complete genome  
Length=29202

Score = 37.0 bits (84), Expect = 0.078, Method: Compositional matrix adjust.  
Identities = 26/63 (41%), Positives = 31/63 (49%), Gaps = 0/63 (0%)  
Frame = +3

Query 43 IPGHPGHNGAPGRDGRDGTTPGEKGEKGDPLIGPKGDIGETGVPGAEGPRGFPGIQGRK 102  
+ G PG G G G G G G G GL+GP G G G+ G +GP G PG G+ G  
Sbjct 14763 VQGVPGPAGVVRGPQGPAGVDGRDGVNGSAGLVGPVGPQGSPLNGVKGPDLPGANGKDG 14942

Query 103 EPG 105  
G  
Sbjct 14943 VAG 14951

>NC\_011023.1 Mycobacterium phage Pukovnik, complete genome  
Length=52892

Score = 36.6 bits (83), Expect = 0.095, Method: Compositional matrix adjust.  
Identities = 28/58 (48%), Positives = 35/58 (60%), Gaps = 0/58 (0%)  
Frame = +1

Query 48 GHNGAPGRDGRDGTTPGEKGEKGDPLIGPKGDIGETGVPGAEGPRGFPGIQGRKGEPG 105  
G G G +G G G KG+KGD G G KGD G+TG G +G +G G +G KG+PG  
Sbjct 4705 GPTGPEGPEGPQGIQGPKGDKGDTGATGAKGDKGDTGSQGLQGIQGPAGPKGDKGDPG 4878

Lambda K H a alpha  
0.316 0.141 0.446 0.792 4.96

Gapped  
Lambda K H a alpha sigma  
0.267 0.0410 0.140 1.90 42.6 43.6

Effective search space used: 11375968268

Effective search space used: 865823240

-----  
Database: Refseq viruses representative genomes  
Posted date: Sep 18, 2017 10:25 PM  
Number of letters in database: 259,746,973  
Number of sequences in database: 9,448

Matrix: BLOSUM62  
Gap Penalties: Existence: 11, Extension: 1  
Neighboring words threshold: 13  
Window for multiple hits: 40

TBLASTN 2.6.0+

Reference: Stephen F. Altschul, Thomas L. Madden, Alejandro A. Schaffer, Jinghui Zhang, Zheng Zhang, Webb Miller, and David J. Lipman (1997), "Gapped BLAST and PSI-BLAST: a new generation of protein database search programs", Nucleic Acids Res. 25:3389-3402.

Database: Refseq viruses representative genomes  
9,448 sequences; 259,746,973 total letters
