# Supplementary material
Source: PubMed Central journal article supplement (PMC5877943)
Supplement: pnas.1721117115.sd04.pdf [file pnas.1721117115.sd04.pdf]

## Supplementary Dataset 4: Identification of LCDV-Sa in human enteric virome.

The data for this analysis was obtained from NCBI (SRA ID: PRJNA275568) and the name of the project is "Human stool virome in islet autoimmunity". We report the BlastN hits that show a significant alignment with LCDV-Sa sequences. No significant hits were identified for LCDV-1, GIV and SGIV in this dataset. Human herpes virus and human parechovirus were used as controls. The full length reads that gave a significant hit for LCDV-Sa are reported at the end of the document.

### 1- LCDV-1

Query= NC\_001824.1 Lymphocystis disease virus 1, complete genome

Length=102653

\*\*\*\*\* No hits found \*\*\*\*\*

|        |       |      |
|--------|-------|------|
| Lambda | K     | H    |
| 1.33   | 0.621 | 1.12 |

|        |       |       |
|--------|-------|-------|
| Gapped |       |       |
| Lambda | K     | H     |
| 1.28   | 0.460 | 0.850 |

Effective search space used: 1986974652939930

### 2- LCDV-Sa

Query= NC\_033423.1 Lymphocystis disease virus Sa isolate SA9, complete genome

Length=208501

| Sequences producing significant alignments: | Score (Bits) | E Value |
|---------------------------------------------|--------------|---------|
| SRR2298382.126301 126301 length=502         | 52.8         | 0.50    |
| SRR2298382.124650 124650 length=156         | 52.8         | 0.50    |
| SRR2298382.122212 122212 length=190         | 52.8         | 0.50    |
| SRR2298382.118813 118813 length=192         | 52.8         | 0.50    |
| SRR2298382.112002 112002 length=344         | 52.8         | 0.50    |
| SRR2298382.111826 111826 length=502         | 52.8         | 0.50    |
| SRR2298382.108909 108909 length=194         | 52.8         | 0.50    |
| SRR2298382.106152 106152 length=342         | 52.8         | 0.50    |
| SRR2298382.104887 104887 length=164         | 52.8         | 0.50    |
| SRR2298382.99979 99979 length=252           | 52.8         | 0.50    |
| SRR2298382.87062 87062 length=501           | 52.8         | 0.50    |
| SRR2298382.83290 83290 length=502           | 52.8         | 0.50    |
| SRR2298382.81661 81661 length=378           | 52.8         | 0.50    |
| SRR2298382.81567 81567 length=266           | 52.8         | 0.50    |
| SRR2298382.78124 78124 length=400           | 52.8         | 0.50    |

|                   |        |            |      |      |
|-------------------|--------|------------|------|------|
| SRR2298382.77844  | 77844  | length=360 | 52.8 | 0.50 |
| SRR2298382.71542  | 71542  | length=356 | 52.8 | 0.50 |
| SRR2298382.70519  | 70519  | length=246 | 52.8 | 0.50 |
| SRR2298382.69009  | 69009  | length=420 | 52.8 | 0.50 |
| SRR2298382.65644  | 65644  | length=501 | 52.8 | 0.50 |
| SRR2298382.63389  | 63389  | length=501 | 52.8 | 0.50 |
| SRR2298382.58758  | 58758  | length=346 | 52.8 | 0.50 |
| SRR2298382.58475  | 58475  | length=501 | 52.8 | 0.50 |
| SRR2298382.56894  | 56894  | length=376 | 52.8 | 0.50 |
| SRR2298382.52746  | 52746  | length=236 | 52.8 | 0.50 |
| SRR2298382.47829  | 47829  | length=192 | 52.8 | 0.50 |
| SRR2298382.47185  | 47185  | length=501 | 52.8 | 0.50 |
| SRR2298382.37617  | 37617  | length=501 | 52.8 | 0.50 |
| SRR2298382.35774  | 35774  | length=500 | 52.8 | 0.50 |
| SRR2298382.26484  | 26484  | length=170 | 52.8 | 0.50 |
| SRR2298382.25595  | 25595  | length=500 | 52.8 | 0.50 |
| SRR2298382.20988  | 20988  | length=501 | 52.8 | 0.50 |
| SRR2298382.18993  | 18993  | length=498 | 52.8 | 0.50 |
| SRR2298382.18914  | 18914  | length=468 | 52.8 | 0.50 |
| SRR2298382.6569   | 6569   | length=366 | 52.8 | 0.50 |
| SRR2298382.1706   | 1706   | length=492 | 52.8 | 0.50 |
| SRR2298290.411674 | 411674 | length=502 | 52.8 | 0.50 |

>SRR2298382.126301 126301 length=502  
Length=502

Score = 52.8 bits (28), Expect = 0.50  
Identities = 28/28 (100%), Gaps = 0/28 (0%)  
Strand=Plus/Plus

|       |        |                              |        |
|-------|--------|------------------------------|--------|
| Query | 135821 | GCAAGGACCTGTTGGACCTGCTGGACCT | 135848 |
|       |        |                              |        |
| Sbjct | 73     | GCAAGGACCTGTTGGACCTGCTGGACCT | 100    |

Score = 52.8 bits (28), Expect = 0.50  
Identities = 28/28 (100%), Gaps = 0/28 (0%)  
Strand=Plus/Minus

|       |        |                              |        |
|-------|--------|------------------------------|--------|
| Query | 135821 | GCAAGGACCTGTTGGACCTGCTGGACCT | 135848 |
|       |        |                              |        |
| Sbjct | 447    | GCAAGGACCTGTTGGACCTGCTGGACCT | 420    |

>SRR2298382.124650 124650 length=156  
Length=156

Score = 52.8 bits (28), Expect = 0.50  
Identities = 28/28 (100%), Gaps = 0/28 (0%)  
Strand=Plus/Plus

|       |        |                              |        |
|-------|--------|------------------------------|--------|
| Query | 135821 | GCAAGGACCTGTTGGACCTGCTGGACCT | 135848 |
|       |        |                              |        |
| Sbjct | 28     | GCAAGGACCTGTTGGACCTGCTGGACCT | 55     |

Score = 52.8 bits (28), Expect = 0.50  
Identities = 28/28 (100%), Gaps = 0/28 (0%)

Strand=Plus/Minus

```
Query 135821 GCAAGGACCTGTTGGACCTGCTGGACCT 135848
          |||
Sbjct 129    GCAAGGACCTGTTGGACCTGCTGGACCT 102
```

>SRR2298382.122212 122212 length=190  
Length=190

Score = 52.8 bits (28), Expect = 0.50  
Identities = 28/28 (100%), Gaps = 0/28 (0%)  
Strand=Plus/Plus

```
Query 135821 GCAAGGACCTGTTGGACCTGCTGGACCT 135848
          |||
Sbjct 28     GCAAGGACCTGTTGGACCTGCTGGACCT 55
```

Score = 52.8 bits (28), Expect = 0.50  
Identities = 28/28 (100%), Gaps = 0/28 (0%)  
Strand=Plus/Minus

```
Query 135821 GCAAGGACCTGTTGGACCTGCTGGACCT 135848
          |||
Sbjct 163    GCAAGGACCTGTTGGACCTGCTGGACCT 136
```

>SRR2298382.118813 118813 length=192  
Length=192

Score = 52.8 bits (28), Expect = 0.50  
Identities = 28/28 (100%), Gaps = 0/28 (0%)  
Strand=Plus/Minus

```
Query 135821 GCAAGGACCTGTTGGACCTGCTGGACCT 135848
          |||
Sbjct 168    GCAAGGACCTGTTGGACCTGCTGGACCT 141
```

>SRR2298382.112002 112002 length=344  
Length=344

Score = 52.8 bits (28), Expect = 0.50  
Identities = 28/28 (100%), Gaps = 0/28 (0%)  
Strand=Plus/Plus

```
Query 135821 GCAAGGACCTGTTGGACCTGCTGGACCT 135848
          |||
Sbjct 24     GCAAGGACCTGTTGGACCTGCTGGACCT 51
```

Score = 52.8 bits (28), Expect = 0.50  
Identities = 28/28 (100%), Gaps = 0/28 (0%)  
Strand=Plus/Minus

```
Query 135821 GCAAGGACCTGTTGGACCTGCTGGACCT 135848
          |||
Sbjct 321    GCAAGGACCTGTTGGACCTGCTGGACCT 294
```

>SRR2298382.111826 111826 length=502  
Length=502

Score = 52.8 bits (28), Expect = 0.50  
Identities = 28/28 (100%), Gaps = 0/28 (0%)  
Strand=Plus/Plus

Query 135821 GCAAGGACCTGTTGGACCTGCTGGACCT 135848  
|||||  
Sbjct 188 GCAAGGACCTGTTGGACCTGCTGGACCT 215

Score = 52.8 bits (28), Expect = 0.50  
Identities = 28/28 (100%), Gaps = 0/28 (0%)  
Strand=Plus/Minus

Query 135821 GCAAGGACCTGTTGGACCTGCTGGACCT 135848  
|||||  
Sbjct 323 GCAAGGACCTGTTGGACCTGCTGGACCT 296

>SRR2298382.108909 108909 length=194  
Length=194

Score = 52.8 bits (28), Expect = 0.50  
Identities = 28/28 (100%), Gaps = 0/28 (0%)  
Strand=Plus/Plus

Query 135821 GCAAGGACCTGTTGGACCTGCTGGACCT 135848  
|||||  
Sbjct 47 GCAAGGACCTGTTGGACCTGCTGGACCT 74

Score = 52.8 bits (28), Expect = 0.50  
Identities = 28/28 (100%), Gaps = 0/28 (0%)  
Strand=Plus/Minus

Query 135821 GCAAGGACCTGTTGGACCTGCTGGACCT 135848  
|||||  
Sbjct 148 GCAAGGACCTGTTGGACCTGCTGGACCT 121

>SRR2298382.106152 106152 length=342  
Length=342

Score = 52.8 bits (28), Expect = 0.50  
Identities = 28/28 (100%), Gaps = 0/28 (0%)  
Strand=Plus/Minus

Query 135821 GCAAGGACCTGTTGGACCTGCTGGACCT 135848  
|||||  
Sbjct 133 GCAAGGACCTGTTGGACCTGCTGGACCT 106

Score = 52.8 bits (28), Expect = 0.50  
Identities = 28/28 (100%), Gaps = 0/28 (0%)  
Strand=Plus/Plus

Query 135821 GCAAGGACCTGTTGGACCTGCTGGACCT 135848  
|  
Sbjct 210 GCAAGGACCTGTTGGACCTGCTGGACCT 237

>SRR2298382.104887 104887 length=164  
Length=164

Score = 52.8 bits (28), Expect = 0.50  
Identities = 28/28 (100%), Gaps = 0/28 (0%)  
Strand=Plus/Minus

Query 135821 GCAAGGACCTGTTGGACCTGCTGGACCT 135848  
|  
Sbjct 68 GCAAGGACCTGTTGGACCTGCTGGACCT 41

Score = 52.8 bits (28), Expect = 0.50  
Identities = 28/28 (100%), Gaps = 0/28 (0%)  
Strand=Plus/Plus

Query 135821 GCAAGGACCTGTTGGACCTGCTGGACCT 135848  
|  
Sbjct 97 GCAAGGACCTGTTGGACCTGCTGGACCT 124

>SRR2298382.99979 99979 length=252  
Length=252

Score = 52.8 bits (28), Expect = 0.50  
Identities = 28/28 (100%), Gaps = 0/28 (0%)  
Strand=Plus/Minus

Query 135821 GCAAGGACCTGTTGGACCTGCTGGACCT 135848  
|  
Sbjct 68 GCAAGGACCTGTTGGACCTGCTGGACCT 41

Score = 52.8 bits (28), Expect = 0.50  
Identities = 28/28 (100%), Gaps = 0/28 (0%)  
Strand=Plus/Plus

Query 135821 GCAAGGACCTGTTGGACCTGCTGGACCT 135848  
|  
Sbjct 185 GCAAGGACCTGTTGGACCTGCTGGACCT 212

>SRR2298382.87062 87062 length=501  
Length=501

Score = 52.8 bits (28), Expect = 0.50  
Identities = 28/28 (100%), Gaps = 0/28 (0%)  
Strand=Plus/Plus

Query 135821 GCAAGGACCTGTTGGACCTGCTGGACCT 135848  
|  
Sbjct 204 GCAAGGACCTGTTGGACCTGCTGGACCT 231

Score = 52.8 bits (28), Expect = 0.50  
Identities = 28/28 (100%), Gaps = 0/28 (0%)  
Strand=Plus/Minus

Query 135821 GCAAGGACCTGTTGGACCTGCTGGACCT 135848  
|||||  
Sbjct 318 GCAAGGACCTGTTGGACCTGCTGGACCT 291

>SRR2298382.83290 83290 length=502  
Length=502

Score = 52.8 bits (28), Expect = 0.50  
Identities = 28/28 (100%), Gaps = 0/28 (0%)  
Strand=Plus/Plus

Query 135821 GCAAGGACCTGTTGGACCTGCTGGACCT 135848  
|||||  
Sbjct 320 GCAAGGACCTGTTGGACCTGCTGGACCT 347

>SRR2298382.81661 81661 length=378  
Length=378

Score = 52.8 bits (28), Expect = 0.50  
Identities = 28/28 (100%), Gaps = 0/28 (0%)  
Strand=Plus/Minus

Query 135821 GCAAGGACCTGTTGGACCTGCTGGACCT 135848  
|||||  
Sbjct 68 GCAAGGACCTGTTGGACCTGCTGGACCT 41

Score = 52.8 bits (28), Expect = 0.50  
Identities = 28/28 (100%), Gaps = 0/28 (0%)  
Strand=Plus/Plus

Query 135821 GCAAGGACCTGTTGGACCTGCTGGACCT 135848  
|||||  
Sbjct 311 GCAAGGACCTGTTGGACCTGCTGGACCT 338

>SRR2298382.81567 81567 length=266  
Length=266

Score = 52.8 bits (28), Expect = 0.50  
Identities = 28/28 (100%), Gaps = 0/28 (0%)  
Strand=Plus/Minus

Query 135821 GCAAGGACCTGTTGGACCTGCTGGACCT 135848  
|||||  
Sbjct 51 GCAAGGACCTGTTGGACCTGCTGGACCT 24

Score = 52.8 bits (28), Expect = 0.50  
Identities = 28/28 (100%), Gaps = 0/28 (0%)  
Strand=Plus/Plus

Query 135821 GCAAGGACCTGTTGGACCTGCTGGACCT 135848  
|||||  
Sbjct 216 GCAAGGACCTGTTGGACCTGCTGGACCT 243

>SRR2298382.78124 78124 length=400  
Length=400

Score = 52.8 bits (28), Expect = 0.50  
Identities = 28/28 (100%), Gaps = 0/28 (0%)  
Strand=Plus/Minus

Query 135821 GCAAGGACCTGTTGGACCTGCTGGACCT 135848  
|||||  
Sbjct 72 GCAAGGACCTGTTGGACCTGCTGGACCT 45

Score = 52.8 bits (28), Expect = 0.50  
Identities = 28/28 (100%), Gaps = 0/28 (0%)  
Strand=Plus/Plus

Query 135821 GCAAGGACCTGTTGGACCTGCTGGACCT 135848  
|||||  
Sbjct 329 GCAAGGACCTGTTGGACCTGCTGGACCT 356

>SRR2298382.77844 77844 length=360  
Length=360

Score = 52.8 bits (28), Expect = 0.50  
Identities = 28/28 (100%), Gaps = 0/28 (0%)  
Strand=Plus/Minus

Query 135821 GCAAGGACCTGTTGGACCTGCTGGACCT 135848  
|||||  
Sbjct 112 GCAAGGACCTGTTGGACCTGCTGGACCT 85

Score = 52.8 bits (28), Expect = 0.50  
Identities = 28/28 (100%), Gaps = 0/28 (0%)  
Strand=Plus/Plus

Query 135821 GCAAGGACCTGTTGGACCTGCTGGACCT 135848  
|||||  
Sbjct 249 GCAAGGACCTGTTGGACCTGCTGGACCT 276

>SRR2298382.71542 71542 length=356  
Length=356

Score = 52.8 bits (28), Expect = 0.50  
Identities = 28/28 (100%), Gaps = 0/28 (0%)  
Strand=Plus/Minus

Query 135821 GCAAGGACCTGTTGGACCTGCTGGACCT 135848  
|||||  
Sbjct 169 GCAAGGACCTGTTGGACCTGCTGGACCT 142

Score = 52.8 bits (28), Expect = 0.50  
Identities = 28/28 (100%), Gaps = 0/28 (0%)  
Strand=Plus/Plus

Query 135821 GCAAGGACCTGTTGGACCTGCTGGACCT 135848  
|||||  
Sbjct 188 GCAAGGACCTGTTGGACCTGCTGGACCT 215

>SRR2298382.70519 70519 length=246  
Length=246

Score = 52.8 bits (28), Expect = 0.50  
Identities = 28/28 (100%), Gaps = 0/28 (0%)  
Strand=Plus/Minus

Query 135821 GCAAGGACCTGTTGGACCTGCTGGACCT 135848  
|||||  
Sbjct 40 GCAAGGACCTGTTGGACCTGCTGGACCT 13

Score = 52.8 bits (28), Expect = 0.50  
Identities = 28/28 (100%), Gaps = 0/28 (0%)  
Strand=Plus/Plus

Query 135821 GCAAGGACCTGTTGGACCTGCTGGACCT 135848  
|||||  
Sbjct 207 GCAAGGACCTGTTGGACCTGCTGGACCT 234

>SRR2298382.69009 69009 length=420  
Length=420

Score = 52.8 bits (28), Expect = 0.50  
Identities = 28/28 (100%), Gaps = 0/28 (0%)  
Strand=Plus/Minus

Query 135821 GCAAGGACCTGTTGGACCTGCTGGACCT 135848  
|||||  
Sbjct 154 GCAAGGACCTGTTGGACCTGCTGGACCT 127

Score = 52.8 bits (28), Expect = 0.50  
Identities = 28/28 (100%), Gaps = 0/28 (0%)  
Strand=Plus/Plus

Query 135821 GCAAGGACCTGTTGGACCTGCTGGACCT 135848  
|||||  
Sbjct 267 GCAAGGACCTGTTGGACCTGCTGGACCT 294

>SRR2298382.65644 65644 length=501  
Length=501

Score = 52.8 bits (28), Expect = 0.50  
Identities = 28/28 (100%), Gaps = 0/28 (0%)  
Strand=Plus/Plus

Query 135821 GCAAGGACCTGTTGGACCTGCTGGACCT 135848



Sbjct 334 |||||  
GCAAGGACCTGTTGGACCTGCTGGACCT 361

>SRR2298382.63389 63389 length=501  
Length=501

Score = 52.8 bits (28), Expect = 0.50  
Identities = 28/28 (100%), Gaps = 0/28 (0%)  
Strand=Plus/Plus

Query 135821 GCAAGGACCTGTTGGACCTGCTGGACCT 135848  
|||||  
Sbjct 403 GCAAGGACCTGTTGGACCTGCTGGACCT 430

>SRR2298382.58758 58758 length=346  
Length=346

Score = 52.8 bits (28), Expect = 0.50  
Identities = 28/28 (100%), Gaps = 0/28 (0%)  
Strand=Plus/Minus

Query 135821 GCAAGGACCTGTTGGACCTGCTGGACCT 135848  
|||||  
Sbjct 224 GCAAGGACCTGTTGGACCTGCTGGACCT 197

>SRR2298382.58475 58475 length=501  
Length=501

Score = 52.8 bits (28), Expect = 0.50  
Identities = 28/28 (100%), Gaps = 0/28 (0%)  
Strand=Plus/Plus

Query 135821 GCAAGGACCTGTTGGACCTGCTGGACCT 135848  
|||||  
Sbjct 77 GCAAGGACCTGTTGGACCTGCTGGACCT 104

Score = 52.8 bits (28), Expect = 0.50  
Identities = 28/28 (100%), Gaps = 0/28 (0%)  
Strand=Plus/Minus

Query 135821 GCAAGGACCTGTTGGACCTGCTGGACCT 135848  
|||||  
Sbjct 426 GCAAGGACCTGTTGGACCTGCTGGACCT 399

>SRR2298382.56894 56894 length=376  
Length=376

Score = 52.8 bits (28), Expect = 0.50  
Identities = 28/28 (100%), Gaps = 0/28 (0%)  
Strand=Plus/Plus

Query 135821 GCAAGGACCTGTTGGACCTGCTGGACCT 135848  
|||||  
Sbjct 103 GCAAGGACCTGTTGGACCTGCTGGACCT 130

Score = 52.8 bits (28), Expect = 0.50  
Identities = 28/28 (100%), Gaps = 0/28 (0%)  
Strand=Plus/Minus

Query 135821 GCAAGGACCTGTTGGACCTGCTGGACCT 135848  
|||||  
Sbjct 274 GCAAGGACCTGTTGGACCTGCTGGACCT 247

>SRR2298382.52746 52746 length=236  
Length=236

Score = 52.8 bits (28), Expect = 0.50  
Identities = 28/28 (100%), Gaps = 0/28 (0%)  
Strand=Plus/Plus

Query 135821 GCAAGGACCTGTTGGACCTGCTGGACCT 135848  
|||||  
Sbjct 36 GCAAGGACCTGTTGGACCTGCTGGACCT 63

Score = 52.8 bits (28), Expect = 0.50  
Identities = 28/28 (100%), Gaps = 0/28 (0%)  
Strand=Plus/Minus

Query 135821 GCAAGGACCTGTTGGACCTGCTGGACCT 135848  
|||||  
Sbjct 201 GCAAGGACCTGTTGGACCTGCTGGACCT 174

>SRR2298382.47829 47829 length=192  
Length=192

Score = 52.8 bits (28), Expect = 0.50  
Identities = 28/28 (100%), Gaps = 0/28 (0%)  
Strand=Plus/Minus

Query 135821 GCAAGGACCTGTTGGACCTGCTGGACCT 135848  
|||||  
Sbjct 51 GCAAGGACCTGTTGGACCTGCTGGACCT 24

Score = 52.8 bits (28), Expect = 0.50  
Identities = 28/28 (100%), Gaps = 0/28 (0%)  
Strand=Plus/Plus

Query 135821 GCAAGGACCTGTTGGACCTGCTGGACCT 135848  
|||||  
Sbjct 142 GCAAGGACCTGTTGGACCTGCTGGACCT 169

>SRR2298382.47185 47185 length=501  
Length=501

Score = 52.8 bits (28), Expect = 0.50  
Identities = 28/28 (100%), Gaps = 0/28 (0%)  
Strand=Plus/Plus



>SRR2298382.25595 25595 length=500  
Length=500

Score = 52.8 bits (28), Expect = 0.50  
Identities = 28/28 (100%), Gaps = 0/28 (0%)  
Strand=Plus/Plus

Query 135821 GCAAGGACCTGTTGGACCTGCTGGACCT 135848  
|||||  
Sbjct 182 GCAAGGACCTGTTGGACCTGCTGGACCT 209

Score = 52.8 bits (28), Expect = 0.50  
Identities = 28/28 (100%), Gaps = 0/28 (0%)  
Strand=Plus/Minus

Query 135821 GCAAGGACCTGTTGGACCTGCTGGACCT 135848  
|||||  
Sbjct 346 GCAAGGACCTGTTGGACCTGCTGGACCT 319

>SRR2298382.20988 20988 length=501  
Length=501

Score = 52.8 bits (28), Expect = 0.50  
Identities = 28/28 (100%), Gaps = 0/28 (0%)  
Strand=Plus/Plus

Query 135821 GCAAGGACCTGTTGGACCTGCTGGACCT 135848  
|||||  
Sbjct 96 GCAAGGACCTGTTGGACCTGCTGGACCT 123

Score = 52.8 bits (28), Expect = 0.50  
Identities = 28/28 (100%), Gaps = 0/28 (0%)  
Strand=Plus/Minus

Query 135821 GCAAGGACCTGTTGGACCTGCTGGACCT 135848  
|||||  
Sbjct 460 GCAAGGACCTGTTGGACCTGCTGGACCT 433

>SRR2298382.18993 18993 length=498  
Length=498

Score = 52.8 bits (28), Expect = 0.50  
Identities = 28/28 (100%), Gaps = 0/28 (0%)  
Strand=Plus/Plus

Query 135821 GCAAGGACCTGTTGGACCTGCTGGACCT 135848  
|||||  
Sbjct 63 GCAAGGACCTGTTGGACCTGCTGGACCT 90

Score = 52.8 bits (28), Expect = 0.50  
Identities = 28/28 (100%), Gaps = 0/28 (0%)  
Strand=Plus/Minus

Query 135821 GCAAGGACCTGTTGGACCTGCTGGACCT 135848  
|  
Sbjct 432 GCAAGGACCTGTTGGACCTGCTGGACCT 405

>SRR2298382.18914 18914 length=468  
Length=468

Score = 52.8 bits (28), Expect = 0.50  
Identities = 28/28 (100%), Gaps = 0/28 (0%)  
Strand=Plus/Minus

Query 135821 GCAAGGACCTGTTGGACCTGCTGGACCT 135848  
|  
Sbjct 197 GCAAGGACCTGTTGGACCTGCTGGACCT 170

Score = 52.8 bits (28), Expect = 0.50  
Identities = 28/28 (100%), Gaps = 0/28 (0%)  
Strand=Plus/Plus

Query 135821 GCAAGGACCTGTTGGACCTGCTGGACCT 135848  
|  
Sbjct 272 GCAAGGACCTGTTGGACCTGCTGGACCT 299

>SRR2298382.6569 6569 length=366  
Length=366

Score = 52.8 bits (28), Expect = 0.50  
Identities = 28/28 (100%), Gaps = 0/28 (0%)  
Strand=Plus/Plus

Query 135821 GCAAGGACCTGTTGGACCTGCTGGACCT 135848  
|  
Sbjct 38 GCAAGGACCTGTTGGACCTGCTGGACCT 65

Score = 52.8 bits (28), Expect = 0.50  
Identities = 28/28 (100%), Gaps = 0/28 (0%)  
Strand=Plus/Minus

Query 135821 GCAAGGACCTGTTGGACCTGCTGGACCT 135848  
|  
Sbjct 329 GCAAGGACCTGTTGGACCTGCTGGACCT 302

>SRR2298382.1706 1706 length=492  
Length=492

Score = 52.8 bits (28), Expect = 0.50  
Identities = 28/28 (100%), Gaps = 0/28 (0%)  
Strand=Plus/Plus

Query 135821 GCAAGGACCTGTTGGACCTGCTGGACCT 135848  
|  
Sbjct 32 GCAAGGACCTGTTGGACCTGCTGGACCT 59

Score = 52.8 bits (28), Expect = 0.50  
Identities = 28/28 (100%), Gaps = 0/28 (0%)  
Strand=Plus/Minus

```
Query 135821 GCAAGGACCTGTTGGACCTGCTGGACCT 135848
          |||
Sbjct 461    GCAAGGACCTGTTGGACCTGCTGGACCT 434
```

>SRR2298290.411674 411674 length=502  
Length=502

Score = 52.8 bits (28), Expect = 0.50  
Identities = 28/28 (100%), Gaps = 0/28 (0%)  
Strand=Plus/Minus

```
Query 135821 GCAAGGACCTGTTGGACCTGCTGGACCT 135848
          |||
Sbjct 39     GCAAGGACCTGTTGGACCTGCTGGACCT 12
```

|        |       |      |
|--------|-------|------|
| Lambda | K     | H    |
| 1.33   | 0.621 | 1.12 |

Gapped  
Lambda           K           H  
1.28           0.460       0.850

Effective search space used: 4022997847426584

### 3- SGIV

**Query= NC\_006549.1 Singapore grouper iridovirus, complete genome**

**Length=140131**

**\*\*\*\*\* No hits found \*\*\*\*\***

|        |       |      |
|--------|-------|------|
| Lambda | K     | H    |
| 1.33   | 0.621 | 1.12 |

Gapped  
Lambda           K           H  
1.28           0.460       0.850

Effective search space used: 2712675925101726

### 4- GIV

**Query= AY666015.1 Grouper iridovirus, complete genome**

**Length=139793**

\*\*\*\*\* No hits found \*\*\*\*\*

|        |       |      |
|--------|-------|------|
| Lambda | K     | H    |
| 1.33   | 0.621 | 1.12 |

Gapped

|        |       |       |
|--------|-------|-------|
| Lambda | K     | H     |
| 1.28   | 0.460 | 0.850 |

Effective search space used: 2706131098003410

## 5- Human herpesvirus 7

Query= NC\_001716.2 Human herpesvirus 7, complete genome

Length=153080

\*\*\*\*\* No hits found \*\*\*\*\*

|        |       |      |
|--------|-------|------|
| Lambda | K     | H    |
| 1.33   | 0.621 | 1.12 |

Gapped

|        |       |       |
|--------|-------|-------|
| Lambda | K     | H     |
| 1.28   | 0.460 | 0.850 |

Effective search space used: 2963412511184844

## 6- Human parechovirus 1

Query= JX575746.1 Human parechovirus 1 isolate CAU10-NN, complete genome

Length=7348

| Sequences producing significant alignments: | Score<br>(Bits) | E<br>Value |
|---------------------------------------------|-----------------|------------|
| SRR2298578.40400 40400 length=500           | 499             | 5e-137     |
| SRR2298573.122301 122301 length=500         | 440             | 3e-119     |
| SRR2298573.862030 862030 length=500         | 436             | 4e-118     |
| SRR2298573.814921 814921 length=500         | 436             | 4e-118     |
| SRR2298573.595924 595924 length=500         | 436             | 4e-118     |
| SRR2298573.482382 482382 length=500         | 436             | 4e-118     |
| SRR2298573.51148 51148 length=500           | 436             | 4e-118     |
| SRR2298546.826318 826318 length=501         | 436             | 4e-118     |
| SRR2298573.820409 820409 length=500         | 435             | 2e-117     |
| SRR2298573.724260 724260 length=500         | 435             | 2e-117     |
| SRR2298573.708355 708355 length=500         | 435             | 2e-117     |
| SRR2298573.664456 664456 length=500         | 435             | 2e-117     |
| SRR2298573.584493 584493 length=500         | 435             | 2e-117     |
| SRR2298573.530988 530988 length=500         | 435             | 2e-117     |
| SRR2298573.512385 512385 length=500         | 435             | 2e-117     |
| SRR2298573.476602 476602 length=500         | 435             | 2e-117     |

|                    |         |            |     |        |
|--------------------|---------|------------|-----|--------|
| SRR2298573.293144  | 293144  | length=500 | 435 | 2e-117 |
| SRR2298573.260918  | 260918  | length=500 | 435 | 2e-117 |
| SRR2298573.165720  | 165720  | length=500 | 435 | 2e-117 |
| SRR2298573.147826  | 147826  | length=500 | 435 | 2e-117 |
| SRR2298573.138574  | 138574  | length=500 | 435 | 2e-117 |
| SRR2298573.114824  | 114824  | length=500 | 435 | 2e-117 |
| SRR2298573.95695   | 95695   | length=500 | 435 | 2e-117 |
| SRR2298566.272602  | 272602  | length=500 | 435 | 2e-117 |
| SRR2298546.837218  | 837218  | length=501 | 435 | 2e-117 |
| SRR2298546.758593  | 758593  | length=500 | 435 | 2e-117 |
| SRR2298546.171832  | 171832  | length=502 | 435 | 2e-117 |
| SRR2298546.85661   | 85661   | length=502 | 435 | 2e-117 |
| SRR2298382.81982   | 81982   | length=502 | 435 | 2e-117 |
| SRR2298573.824788  | 824788  | length=500 | 433 | 5e-117 |
| SRR2298573.800813  | 800813  | length=500 | 433 | 5e-117 |
| SRR2298573.779215  | 779215  | length=500 | 433 | 5e-117 |
| SRR2298573.758263  | 758263  | length=500 | 433 | 5e-117 |
| SRR2298573.736368  | 736368  | length=500 | 433 | 5e-117 |
| SRR2298573.593802  | 593802  | length=500 | 433 | 5e-117 |
| SRR2298573.582811  | 582811  | length=500 | 433 | 5e-117 |
| SRR2298573.563998  | 563998  | length=500 | 433 | 5e-117 |
| SRR2298573.544508  | 544508  | length=500 | 433 | 5e-117 |
| SRR2298573.509938  | 509938  | length=500 | 433 | 5e-117 |
| SRR2298573.486398  | 486398  | length=500 | 433 | 5e-117 |
| SRR2298573.462636  | 462636  | length=500 | 433 | 5e-117 |
| SRR2298573.451956  | 451956  | length=500 | 433 | 5e-117 |
| SRR2298573.406175  | 406175  | length=500 | 433 | 5e-117 |
| SRR2298573.401580  | 401580  | length=500 | 433 | 5e-117 |
| SRR2298573.350726  | 350726  | length=500 | 433 | 5e-117 |
| SRR2298573.330438  | 330438  | length=500 | 433 | 5e-117 |
| SRR2298573.321918  | 321918  | length=500 | 433 | 5e-117 |
| SRR2298573.300070  | 300070  | length=500 | 433 | 5e-117 |
| SRR2298573.280250  | 280250  | length=500 | 433 | 5e-117 |
| SRR2298573.250564  | 250564  | length=500 | 433 | 5e-117 |
| SRR2298573.191538  | 191538  | length=500 | 433 | 5e-117 |
| SRR2298573.142735  | 142735  | length=500 | 433 | 5e-117 |
| SRR2298573.100807  | 100807  | length=500 | 433 | 5e-117 |
| SRR2298573.93103   | 93103   | length=500 | 433 | 5e-117 |
| SRR2298573.59417   | 59417   | length=500 | 433 | 5e-117 |
| SRR2298573.13345   | 13345   | length=500 | 433 | 5e-117 |
| SRR2298546.925026  | 925026  | length=502 | 433 | 5e-117 |
| SRR2298546.917017  | 917017  | length=500 | 433 | 5e-117 |
| SRR2298546.733295  | 733295  | length=502 | 433 | 5e-117 |
| SRR2298546.572666  | 572666  | length=502 | 433 | 5e-117 |
| SRR2298546.570152  | 570152  | length=501 | 433 | 5e-117 |
| SRR2298546.467110  | 467110  | length=502 | 433 | 5e-117 |
| SRR2298546.362559  | 362559  | length=502 | 433 | 5e-117 |
| SRR2298546.103054  | 103054  | length=502 | 433 | 5e-117 |
| SRR2298578.1030338 | 1030338 | length=500 | 431 | 2e-116 |
| SRR2298578.535032  | 535032  | length=500 | 431 | 2e-116 |
| SRR2298573.869794  | 869794  | length=500 | 431 | 2e-116 |
| SRR2298573.825070  | 825070  | length=500 | 431 | 2e-116 |
| SRR2298573.781063  | 781063  | length=500 | 431 | 2e-116 |
| SRR2298573.780853  | 780853  | length=500 | 431 | 2e-116 |
| SRR2298573.769703  | 769703  | length=500 | 431 | 2e-116 |
| SRR2298573.746679  | 746679  | length=500 | 431 | 2e-116 |
| SRR2298573.740334  | 740334  | length=500 | 431 | 2e-116 |
| SRR2298573.710464  | 710464  | length=500 | 431 | 2e-116 |
| SRR2298573.706510  | 706510  | length=500 | 431 | 2e-116 |



|                   |        |            |     |        |
|-------------------|--------|------------|-----|--------|
| SRR2298573.647887 | 647887 | length=500 | 431 | 2e-116 |
| SRR2298573.588383 | 588383 | length=500 | 431 | 2e-116 |
| SRR2298573.550702 | 550702 | length=500 | 431 | 2e-116 |
| SRR2298573.529564 | 529564 | length=500 | 431 | 2e-116 |
| SRR2298573.498005 | 498005 | length=500 | 431 | 2e-116 |
| SRR2298573.468266 | 468266 | length=500 | 431 | 2e-116 |
| SRR2298573.423667 | 423667 | length=500 | 431 | 2e-116 |
| SRR2298573.403271 | 403271 | length=500 | 431 | 2e-116 |
| SRR2298573.379421 | 379421 | length=500 | 431 | 2e-116 |
| SRR2298573.374775 | 374775 | length=500 | 431 | 2e-116 |
| SRR2298573.349802 | 349802 | length=500 | 431 | 2e-116 |
| SRR2298573.317178 | 317178 | length=500 | 431 | 2e-116 |
| SRR2298573.316987 | 316987 | length=500 | 431 | 2e-116 |
| SRR2298573.312469 | 312469 | length=500 | 431 | 2e-116 |
| SRR2298573.312255 | 312255 | length=500 | 431 | 2e-116 |
| SRR2298573.293391 | 293391 | length=500 | 431 | 2e-116 |
| SRR2298573.278399 | 278399 | length=500 | 431 | 2e-116 |
| SRR2298573.240500 | 240500 | length=500 | 431 | 2e-116 |
| SRR2298573.235938 | 235938 | length=500 | 431 | 2e-116 |
| SRR2298573.227970 | 227970 | length=500 | 431 | 2e-116 |
| SRR2298573.171554 | 171554 | length=500 | 431 | 2e-116 |
| SRR2298573.169771 | 169771 | length=500 | 431 | 2e-116 |
| SRR2298573.140309 | 140309 | length=500 | 431 | 2e-116 |
| SRR2298573.137408 | 137408 | length=500 | 431 | 2e-116 |
| SRR2298573.125219 | 125219 | length=500 | 431 | 2e-116 |
| SRR2298573.38478  | 38478  | length=500 | 431 | 2e-116 |
| SRR2298573.11925  | 11925  | length=500 | 431 | 2e-116 |
| SRR2298546.866875 | 866875 | length=501 | 431 | 2e-116 |
| SRR2298546.783224 | 783224 | length=502 | 431 | 2e-116 |
| SRR2298546.762882 | 762882 | length=502 | 431 | 2e-116 |
| SRR2298546.676879 | 676879 | length=502 | 431 | 2e-116 |
| SRR2298546.661134 | 661134 | length=501 | 431 | 2e-116 |
| SRR2298546.580465 | 580465 | length=501 | 431 | 2e-116 |
| SRR2298546.555649 | 555649 | length=502 | 431 | 2e-116 |
| SRR2298546.529810 | 529810 | length=502 | 431 | 2e-116 |
| SRR2298546.521679 | 521679 | length=502 | 431 | 2e-116 |
| SRR2298546.519576 | 519576 | length=502 | 431 | 2e-116 |
| SRR2298546.505689 | 505689 | length=502 | 431 | 2e-116 |
| SRR2298546.478474 | 478474 | length=501 | 431 | 2e-116 |
| SRR2298546.429699 | 429699 | length=502 | 431 | 2e-116 |
| SRR2298546.417769 | 417769 | length=502 | 431 | 2e-116 |
| SRR2298546.405018 | 405018 | length=502 | 431 | 2e-116 |
| SRR2298546.355837 | 355837 | length=502 | 431 | 2e-116 |
| SRR2298546.310301 | 310301 | length=501 | 431 | 2e-116 |
| SRR2298546.275254 | 275254 | length=502 | 431 | 2e-116 |
| SRR2298546.252499 | 252499 | length=501 | 431 | 2e-116 |
| SRR2298546.193011 | 193011 | length=500 | 431 | 2e-116 |
| SRR2298546.191934 | 191934 | length=501 | 431 | 2e-116 |
| SRR2298546.179038 | 179038 | length=501 | 431 | 2e-116 |
| SRR2298546.106566 | 106566 | length=502 | 431 | 2e-116 |
| SRR2298382.118509 | 118509 | length=500 | 431 | 2e-116 |
| SRR2298382.107523 | 107523 | length=502 | 431 | 2e-116 |
| SRR2298382.63975  | 63975  | length=502 | 431 | 2e-116 |
| SRR2298578.700636 | 700636 | length=500 | 429 | 7e-116 |
| SRR2298578.248012 | 248012 | length=500 | 429 | 7e-116 |
| SRR2298573.878601 | 878601 | length=500 | 429 | 7e-116 |
| SRR2298573.877679 | 877679 | length=500 | 429 | 7e-116 |
| SRR2298573.870403 | 870403 | length=500 | 429 | 7e-116 |
| SRR2298573.865355 | 865355 | length=500 | 429 | 7e-116 |

|                   |        |            |     |        |
|-------------------|--------|------------|-----|--------|
| SRR2298573.855147 | 855147 | length=500 | 429 | 7e-116 |
| SRR2298573.849493 | 849493 | length=500 | 429 | 7e-116 |
| SRR2298573.839628 | 839628 | length=500 | 429 | 7e-116 |
| SRR2298573.835256 | 835256 | length=500 | 429 | 7e-116 |
| SRR2298573.819549 | 819549 | length=500 | 429 | 7e-116 |
| SRR2298573.806866 | 806866 | length=500 | 429 | 7e-116 |
| SRR2298573.801823 | 801823 | length=500 | 429 | 7e-116 |
| SRR2298573.786859 | 786859 | length=500 | 429 | 7e-116 |
| SRR2298573.768862 | 768862 | length=500 | 429 | 7e-116 |
| SRR2298573.759611 | 759611 | length=500 | 429 | 7e-116 |
| SRR2298573.759443 | 759443 | length=500 | 429 | 7e-116 |
| SRR2298573.756161 | 756161 | length=500 | 429 | 7e-116 |
| SRR2298573.737432 | 737432 | length=500 | 429 | 7e-116 |
| SRR2298573.723480 | 723480 | length=500 | 429 | 7e-116 |
| SRR2298573.716980 | 716980 | length=500 | 429 | 7e-116 |
| SRR2298573.711657 | 711657 | length=500 | 429 | 7e-116 |
| SRR2298573.701171 | 701171 | length=500 | 429 | 7e-116 |
| SRR2298573.685469 | 685469 | length=500 | 429 | 7e-116 |
| SRR2298573.656085 | 656085 | length=500 | 429 | 7e-116 |
| SRR2298573.648379 | 648379 | length=500 | 429 | 7e-116 |
| SRR2298573.641321 | 641321 | length=500 | 429 | 7e-116 |
| SRR2298573.604233 | 604233 | length=500 | 429 | 7e-116 |
| SRR2298573.602990 | 602990 | length=500 | 429 | 7e-116 |
| SRR2298573.583035 | 583035 | length=500 | 429 | 7e-116 |
| SRR2298573.575252 | 575252 | length=500 | 429 | 7e-116 |
| SRR2298573.567616 | 567616 | length=500 | 429 | 7e-116 |
| SRR2298573.566690 | 566690 | length=500 | 429 | 7e-116 |
| SRR2298573.556526 | 556526 | length=500 | 429 | 7e-116 |
| SRR2298573.543314 | 543314 | length=500 | 429 | 7e-116 |
| SRR2298573.528592 | 528592 | length=500 | 429 | 7e-116 |
| SRR2298573.525005 | 525005 | length=500 | 429 | 7e-116 |
| SRR2298573.524182 | 524182 | length=500 | 429 | 7e-116 |
| SRR2298573.521950 | 521950 | length=500 | 429 | 7e-116 |
| SRR2298573.521747 | 521747 | length=500 | 429 | 7e-116 |
| SRR2298573.521506 | 521506 | length=500 | 429 | 7e-116 |
| SRR2298573.502605 | 502605 | length=500 | 429 | 7e-116 |
| SRR2298573.502479 | 502479 | length=500 | 429 | 7e-116 |
| SRR2298573.499345 | 499345 | length=500 | 429 | 7e-116 |
| SRR2298573.484755 | 484755 | length=500 | 429 | 7e-116 |
| SRR2298573.477415 | 477415 | length=500 | 429 | 7e-116 |
| SRR2298573.477266 | 477266 | length=500 | 429 | 7e-116 |
| SRR2298573.474177 | 474177 | length=500 | 429 | 7e-116 |
| SRR2298573.472684 | 472684 | length=500 | 429 | 7e-116 |
| SRR2298573.471442 | 471442 | length=500 | 429 | 7e-116 |
| SRR2298573.470122 | 470122 | length=500 | 429 | 7e-116 |
| SRR2298573.466202 | 466202 | length=500 | 429 | 7e-116 |
| SRR2298573.464947 | 464947 | length=500 | 429 | 7e-116 |
| SRR2298573.460111 | 460111 | length=500 | 429 | 7e-116 |
| SRR2298573.445246 | 445246 | length=500 | 429 | 7e-116 |
| SRR2298573.439597 | 439597 | length=500 | 429 | 7e-116 |
| SRR2298573.434018 | 434018 | length=500 | 429 | 7e-116 |
| SRR2298573.432649 | 432649 | length=500 | 429 | 7e-116 |
| SRR2298573.428971 | 428971 | length=500 | 429 | 7e-116 |
| SRR2298573.400359 | 400359 | length=500 | 429 | 7e-116 |
| SRR2298573.372955 | 372955 | length=500 | 429 | 7e-116 |
| SRR2298573.356978 | 356978 | length=500 | 429 | 7e-116 |
| SRR2298573.318184 | 318184 | length=500 | 429 | 7e-116 |
| SRR2298573.314513 | 314513 | length=500 | 429 | 7e-116 |
| SRR2298573.309719 | 309719 | length=500 | 429 | 7e-116 |

|                    |         |            |     |        |
|--------------------|---------|------------|-----|--------|
| SRR2298573.304269  | 304269  | length=500 | 429 | 7e-116 |
| SRR2298573.271506  | 271506  | length=500 | 429 | 7e-116 |
| SRR2298573.248619  | 248619  | length=500 | 429 | 7e-116 |
| SRR2298573.246804  | 246804  | length=500 | 429 | 7e-116 |
| SRR2298573.246257  | 246257  | length=500 | 429 | 7e-116 |
| SRR2298573.240979  | 240979  | length=500 | 429 | 7e-116 |
| SRR2298573.223650  | 223650  | length=500 | 429 | 7e-116 |
| SRR2298573.223439  | 223439  | length=500 | 429 | 7e-116 |
| SRR2298573.223034  | 223034  | length=500 | 429 | 7e-116 |
| SRR2298573.207601  | 207601  | length=500 | 429 | 7e-116 |
| SRR2298573.204285  | 204285  | length=500 | 429 | 7e-116 |
| SRR2298573.190220  | 190220  | length=500 | 429 | 7e-116 |
| SRR2298573.178633  | 178633  | length=500 | 429 | 7e-116 |
| SRR2298573.167573  | 167573  | length=500 | 429 | 7e-116 |
| SRR2298573.129131  | 129131  | length=500 | 429 | 7e-116 |
| SRR2298573.122310  | 122310  | length=500 | 429 | 7e-116 |
| SRR2298573.121752  | 121752  | length=500 | 429 | 7e-116 |
| SRR2298573.106244  | 106244  | length=500 | 429 | 7e-116 |
| SRR2298573.96228   | 96228   | length=500 | 429 | 7e-116 |
| SRR2298573.90787   | 90787   | length=500 | 429 | 7e-116 |
| SRR2298573.71711   | 71711   | length=500 | 429 | 7e-116 |
| SRR2298573.49960   | 49960   | length=500 | 429 | 7e-116 |
| SRR2298573.48192   | 48192   | length=500 | 429 | 7e-116 |
| SRR2298573.42949   | 42949   | length=500 | 429 | 7e-116 |
| SRR2298573.25832   | 25832   | length=500 | 429 | 7e-116 |
| SRR2298573.22802   | 22802   | length=500 | 429 | 7e-116 |
| SRR2298573.22004   | 22004   | length=500 | 429 | 7e-116 |
| SRR2298573.21098   | 21098   | length=500 | 429 | 7e-116 |
| SRR2298573.20649   | 20649   | length=500 | 429 | 7e-116 |
| SRR2298573.19115   | 19115   | length=500 | 429 | 7e-116 |
| SRR2298573.12663   | 12663   | length=500 | 429 | 7e-116 |
| SRR2298573.7958    | 7958    | length=500 | 429 | 7e-116 |
| SRR2298566.575132  | 575132  | length=500 | 429 | 7e-116 |
| SRR2298566.451439  | 451439  | length=500 | 429 | 7e-116 |
| SRR2298566.378213  | 378213  | length=500 | 429 | 7e-116 |
| SRR2298546.989298  | 989298  | length=500 | 429 | 7e-116 |
| SRR2298546.892755  | 892755  | length=500 | 429 | 7e-116 |
| SRR2298546.846783  | 846783  | length=501 | 429 | 7e-116 |
| SRR2298546.823945  | 823945  | length=502 | 429 | 7e-116 |
| SRR2298546.818952  | 818952  | length=500 | 429 | 7e-116 |
| SRR2298546.568253  | 568253  | length=501 | 429 | 7e-116 |
| SRR2298546.429759  | 429759  | length=502 | 429 | 7e-116 |
| SRR2298546.424373  | 424373  | length=501 | 429 | 7e-116 |
| SRR2298546.317425  | 317425  | length=500 | 429 | 7e-116 |
| SRR2298546.264343  | 264343  | length=501 | 429 | 7e-116 |
| SRR2298382.75729   | 75729   | length=501 | 429 | 7e-116 |
| SRR2298382.11686   | 11686   | length=501 | 429 | 7e-116 |
| SRR2298578.1031647 | 1031647 | length=500 | 427 | 3e-115 |
| SRR2298578.969663  | 969663  | length=500 | 427 | 3e-115 |
| SRR2298578.960513  | 960513  | length=500 | 427 | 3e-115 |
| SRR2298578.398520  | 398520  | length=500 | 427 | 3e-115 |
| SRR2298578.380777  | 380777  | length=500 | 427 | 3e-115 |
| SRR2298578.377864  | 377864  | length=500 | 427 | 3e-115 |
| SRR2298578.142685  | 142685  | length=500 | 427 | 3e-115 |
| SRR2298578.41611   | 41611   | length=500 | 427 | 3e-115 |
| SRR2298573.879666  | 879666  | length=500 | 427 | 3e-115 |
| SRR2298573.865740  | 865740  | length=500 | 427 | 3e-115 |
| SRR2298573.846748  | 846748  | length=500 | 427 | 3e-115 |
| SRR2298573.838349  | 838349  | length=500 | 427 | 3e-115 |

|                   |        |            |     |        |
|-------------------|--------|------------|-----|--------|
| SRR2298573.837220 | 837220 | length=500 | 427 | 3e-115 |
| SRR2298573.835458 | 835458 | length=500 | 427 | 3e-115 |
| SRR2298573.832916 | 832916 | length=500 | 427 | 3e-115 |
| SRR2298573.815070 | 815070 | length=500 | 427 | 3e-115 |
| SRR2298573.785020 | 785020 | length=500 | 427 | 3e-115 |
| SRR2298573.777508 | 777508 | length=500 | 427 | 3e-115 |
| SRR2298573.773393 | 773393 | length=500 | 427 | 3e-115 |
| SRR2298573.765785 | 765785 | length=500 | 427 | 3e-115 |
| SRR2298573.763553 | 763553 | length=500 | 427 | 3e-115 |
| SRR2298573.746819 | 746819 | length=500 | 427 | 3e-115 |
| SRR2298573.740197 | 740197 | length=500 | 427 | 3e-115 |
| SRR2298573.714172 | 714172 | length=500 | 427 | 3e-115 |
| SRR2298573.713838 | 713838 | length=500 | 427 | 3e-115 |
| SRR2298573.705728 | 705728 | length=500 | 427 | 3e-115 |
| SRR2298573.703156 | 703156 | length=500 | 427 | 3e-115 |
| SRR2298573.689935 | 689935 | length=500 | 427 | 3e-115 |
| SRR2298573.672972 | 672972 | length=500 | 427 | 3e-115 |
| SRR2298573.660547 | 660547 | length=500 | 427 | 3e-115 |
| SRR2298573.656146 | 656146 | length=500 | 427 | 3e-115 |
| SRR2298573.656095 | 656095 | length=500 | 427 | 3e-115 |
| SRR2298573.655490 | 655490 | length=500 | 427 | 3e-115 |
| SRR2298573.647975 | 647975 | length=500 | 427 | 3e-115 |
| SRR2298573.644859 | 644859 | length=500 | 427 | 3e-115 |
| SRR2298573.626625 | 626625 | length=500 | 427 | 3e-115 |
| SRR2298573.625040 | 625040 | length=500 | 427 | 3e-115 |
| SRR2298573.624115 | 624115 | length=500 | 427 | 3e-115 |
| SRR2298573.621436 | 621436 | length=500 | 427 | 3e-115 |
| SRR2298573.602086 | 602086 | length=500 | 427 | 3e-115 |
| SRR2298573.596737 | 596737 | length=500 | 427 | 3e-115 |
| SRR2298573.577384 | 577384 | length=500 | 427 | 3e-115 |
| SRR2298573.574217 | 574217 | length=500 | 427 | 3e-115 |
| SRR2298573.559827 | 559827 | length=500 | 427 | 3e-115 |
| SRR2298573.548826 | 548826 | length=500 | 427 | 3e-115 |
| SRR2298573.529221 | 529221 | length=500 | 427 | 3e-115 |
| SRR2298573.528454 | 528454 | length=500 | 427 | 3e-115 |
| SRR2298573.507597 | 507597 | length=500 | 427 | 3e-115 |
| SRR2298573.499265 | 499265 | length=500 | 427 | 3e-115 |
| SRR2298573.490942 | 490942 | length=500 | 427 | 3e-115 |
| SRR2298573.481619 | 481619 | length=500 | 427 | 3e-115 |
| SRR2298573.476893 | 476893 | length=500 | 427 | 3e-115 |
| SRR2298573.472425 | 472425 | length=500 | 427 | 3e-115 |
| SRR2298573.464310 | 464310 | length=500 | 427 | 3e-115 |
| SRR2298573.405568 | 405568 | length=500 | 427 | 3e-115 |
| SRR2298573.399832 | 399832 | length=500 | 427 | 3e-115 |
| SRR2298573.389986 | 389986 | length=500 | 427 | 3e-115 |
| SRR2298573.352907 | 352907 | length=500 | 427 | 3e-115 |
| SRR2298573.324536 | 324536 | length=500 | 427 | 3e-115 |
| SRR2298573.324191 | 324191 | length=500 | 427 | 3e-115 |
| SRR2298573.321675 | 321675 | length=500 | 427 | 3e-115 |
| SRR2298573.314594 | 314594 | length=500 | 427 | 3e-115 |
| SRR2298573.308975 | 308975 | length=500 | 427 | 3e-115 |
| SRR2298573.293269 | 293269 | length=500 | 427 | 3e-115 |
| SRR2298573.283605 | 283605 | length=500 | 427 | 3e-115 |
| SRR2298573.278347 | 278347 | length=500 | 427 | 3e-115 |
| SRR2298573.241857 | 241857 | length=500 | 427 | 3e-115 |
| SRR2298573.235613 | 235613 | length=500 | 427 | 3e-115 |
| SRR2298573.171313 | 171313 | length=500 | 427 | 3e-115 |
| SRR2298573.171312 | 171312 | length=500 | 427 | 3e-115 |
| SRR2298573.134040 | 134040 | length=500 | 427 | 3e-115 |

|                   |        |            |     |        |
|-------------------|--------|------------|-----|--------|
| SRR2298573.123955 | 123955 | length=500 | 427 | 3e-115 |
| SRR2298573.120785 | 120785 | length=500 | 427 | 3e-115 |
| SRR2298573.114124 | 114124 | length=500 | 427 | 3e-115 |
| SRR2298573.108903 | 108903 | length=500 | 427 | 3e-115 |
| SRR2298573.103183 | 103183 | length=500 | 427 | 3e-115 |
| SRR2298573.92648  | 92648  | length=500 | 427 | 3e-115 |
| SRR2298573.90439  | 90439  | length=500 | 427 | 3e-115 |
| SRR2298573.84307  | 84307  | length=500 | 427 | 3e-115 |
| SRR2298573.72327  | 72327  | length=500 | 427 | 3e-115 |
| SRR2298573.51208  | 51208  | length=500 | 427 | 3e-115 |
| SRR2298573.18393  | 18393  | length=500 | 427 | 3e-115 |
| SRR2298573.10306  | 10306  | length=500 | 427 | 3e-115 |
| SRR2298573.9480   | 9480   | length=500 | 427 | 3e-115 |
| SRR2298546.990572 | 990572 | length=502 | 427 | 3e-115 |
| SRR2298546.982667 | 982667 | length=502 | 427 | 3e-115 |
| SRR2298546.939237 | 939237 | length=501 | 427 | 3e-115 |
| SRR2298546.894812 | 894812 | length=501 | 427 | 3e-115 |
| SRR2298546.668493 | 668493 | length=500 | 427 | 3e-115 |
| SRR2298546.616042 | 616042 | length=500 | 427 | 3e-115 |
| SRR2298546.544232 | 544232 | length=501 | 427 | 3e-115 |
| SRR2298546.528130 | 528130 | length=502 | 427 | 3e-115 |
| SRR2298546.330896 | 330896 | length=499 | 427 | 3e-115 |
| SRR2298546.127960 | 127960 | length=501 | 427 | 3e-115 |
| SRR2298382.46821  | 46821  | length=500 | 427 | 3e-115 |
| SRR2298382.6477   | 6477   | length=499 | 427 | 3e-115 |
| SRR2298578.928299 | 928299 | length=500 | 425 | 9e-115 |
| SRR2298578.882919 | 882919 | length=500 | 425 | 9e-115 |
| SRR2298578.569893 | 569893 | length=500 | 425 | 9e-115 |
| SRR2298578.371545 | 371545 | length=500 | 425 | 9e-115 |
| SRR2298578.133156 | 133156 | length=500 | 425 | 9e-115 |
| SRR2298578.124388 | 124388 | length=500 | 425 | 9e-115 |
| SRR2298573.884147 | 884147 | length=500 | 425 | 9e-115 |
| SRR2298573.883715 | 883715 | length=500 | 425 | 9e-115 |
| SRR2298573.877703 | 877703 | length=500 | 425 | 9e-115 |
| SRR2298573.875376 | 875376 | length=500 | 425 | 9e-115 |
| SRR2298573.826119 | 826119 | length=500 | 425 | 9e-115 |
| SRR2298573.825002 | 825002 | length=500 | 425 | 9e-115 |
| SRR2298573.801247 | 801247 | length=500 | 425 | 9e-115 |
| SRR2298573.768241 | 768241 | length=500 | 425 | 9e-115 |
| SRR2298573.768083 | 768083 | length=500 | 425 | 9e-115 |
| SRR2298573.758331 | 758331 | length=500 | 425 | 9e-115 |
| SRR2298573.748266 | 748266 | length=500 | 425 | 9e-115 |
| SRR2298573.740858 | 740858 | length=500 | 425 | 9e-115 |
| SRR2298573.730447 | 730447 | length=500 | 425 | 9e-115 |
| SRR2298573.728808 | 728808 | length=500 | 425 | 9e-115 |
| SRR2298573.727100 | 727100 | length=500 | 425 | 9e-115 |
| SRR2298573.652172 | 652172 | length=500 | 425 | 9e-115 |
| SRR2298573.648942 | 648942 | length=500 | 425 | 9e-115 |
| SRR2298573.646801 | 646801 | length=500 | 425 | 9e-115 |
| SRR2298573.641626 | 641626 | length=500 | 425 | 9e-115 |
| SRR2298573.632870 | 632870 | length=500 | 425 | 9e-115 |
| SRR2298573.631546 | 631546 | length=500 | 425 | 9e-115 |
| SRR2298573.612592 | 612592 | length=500 | 425 | 9e-115 |
| SRR2298573.596753 | 596753 | length=500 | 425 | 9e-115 |
| SRR2298573.559918 | 559918 | length=500 | 425 | 9e-115 |
| SRR2298573.545454 | 545454 | length=500 | 425 | 9e-115 |
| SRR2298573.541824 | 541824 | length=500 | 425 | 9e-115 |
| SRR2298573.534734 | 534734 | length=500 | 425 | 9e-115 |
| SRR2298573.530527 | 530527 | length=500 | 425 | 9e-115 |

|                   |        |            |     |        |
|-------------------|--------|------------|-----|--------|
| SRR2298573.525129 | 525129 | length=500 | 425 | 9e-115 |
| SRR2298573.501455 | 501455 | length=500 | 425 | 9e-115 |
| SRR2298573.489142 | 489142 | length=500 | 425 | 9e-115 |
| SRR2298573.461742 | 461742 | length=500 | 425 | 9e-115 |
| SRR2298573.446220 | 446220 | length=500 | 425 | 9e-115 |
| SRR2298573.419905 | 419905 | length=500 | 425 | 9e-115 |
| SRR2298573.415056 | 415056 | length=500 | 425 | 9e-115 |
| SRR2298573.393997 | 393997 | length=500 | 425 | 9e-115 |
| SRR2298573.340661 | 340661 | length=500 | 425 | 9e-115 |
| SRR2298573.331041 | 331041 | length=500 | 425 | 9e-115 |
| SRR2298573.322756 | 322756 | length=500 | 425 | 9e-115 |
| SRR2298573.320162 | 320162 | length=500 | 425 | 9e-115 |
| SRR2298573.291167 | 291167 | length=500 | 425 | 9e-115 |
| SRR2298573.285881 | 285881 | length=500 | 425 | 9e-115 |
| SRR2298573.275061 | 275061 | length=500 | 425 | 9e-115 |
| SRR2298573.258663 | 258663 | length=500 | 425 | 9e-115 |
| SRR2298573.251124 | 251124 | length=500 | 425 | 9e-115 |
| SRR2298573.229096 | 229096 | length=500 | 425 | 9e-115 |
| SRR2298573.212316 | 212316 | length=500 | 425 | 9e-115 |
| SRR2298573.189435 | 189435 | length=500 | 425 | 9e-115 |
| SRR2298573.183861 | 183861 | length=500 | 425 | 9e-115 |
| SRR2298573.177819 | 177819 | length=500 | 425 | 9e-115 |
| SRR2298573.172710 | 172710 | length=500 | 425 | 9e-115 |
| SRR2298573.157927 | 157927 | length=500 | 425 | 9e-115 |
| SRR2298573.152595 | 152595 | length=500 | 425 | 9e-115 |
| SRR2298573.149650 | 149650 | length=500 | 425 | 9e-115 |
| SRR2298573.118202 | 118202 | length=500 | 425 | 9e-115 |
| SRR2298573.114854 | 114854 | length=500 | 425 | 9e-115 |
| SRR2298573.102835 | 102835 | length=500 | 425 | 9e-115 |
| SRR2298573.93590  | 93590  | length=500 | 425 | 9e-115 |
| SRR2298573.88750  | 88750  | length=500 | 425 | 9e-115 |
| SRR2298573.49509  | 49509  | length=500 | 425 | 9e-115 |
| SRR2298573.42648  | 42648  | length=500 | 425 | 9e-115 |
| SRR2298573.33453  | 33453  | length=500 | 425 | 9e-115 |
| SRR2298573.26749  | 26749  | length=500 | 425 | 9e-115 |
| SRR2298573.26144  | 26144  | length=500 | 425 | 9e-115 |
| SRR2298546.979245 | 979245 | length=502 | 425 | 9e-115 |
| SRR2298546.941759 | 941759 | length=502 | 425 | 9e-115 |
| SRR2298546.911773 | 911773 | length=501 | 425 | 9e-115 |
| SRR2298546.849756 | 849756 | length=502 | 425 | 9e-115 |
| SRR2298546.846523 | 846523 | length=502 | 425 | 9e-115 |
| SRR2298546.819295 | 819295 | length=502 | 425 | 9e-115 |
| SRR2298546.805273 | 805273 | length=501 | 425 | 9e-115 |
| SRR2298546.803604 | 803604 | length=502 | 425 | 9e-115 |
| SRR2298546.778923 | 778923 | length=502 | 425 | 9e-115 |
| SRR2298546.752878 | 752878 | length=496 | 425 | 9e-115 |
| SRR2298546.712941 | 712941 | length=501 | 425 | 9e-115 |
| SRR2298546.706137 | 706137 | length=502 | 425 | 9e-115 |
| SRR2298546.688397 | 688397 | length=502 | 425 | 9e-115 |
| SRR2298546.643330 | 643330 | length=502 | 425 | 9e-115 |
| SRR2298546.582071 | 582071 | length=502 | 425 | 9e-115 |
| SRR2298546.569833 | 569833 | length=502 | 425 | 9e-115 |
| SRR2298546.536924 | 536924 | length=502 | 425 | 9e-115 |
| SRR2298546.496339 | 496339 | length=500 | 425 | 9e-115 |
| SRR2298546.481387 | 481387 | length=502 | 425 | 9e-115 |
| SRR2298546.446967 | 446967 | length=502 | 425 | 9e-115 |
| SRR2298546.422358 | 422358 | length=502 | 425 | 9e-115 |
| SRR2298546.402906 | 402906 | length=502 | 425 | 9e-115 |
| SRR2298546.351765 | 351765 | length=501 | 425 | 9e-115 |

|                    |         |            |     |        |
|--------------------|---------|------------|-----|--------|
| SRR2298546.348893  | 348893  | length=501 | 425 | 9e-115 |
| SRR2298546.338937  | 338937  | length=502 | 425 | 9e-115 |
| SRR2298546.309495  | 309495  | length=502 | 425 | 9e-115 |
| SRR2298546.282928  | 282928  | length=502 | 425 | 9e-115 |
| SRR2298546.268982  | 268982  | length=502 | 425 | 9e-115 |
| SRR2298546.262246  | 262246  | length=502 | 425 | 9e-115 |
| SRR2298546.262148  | 262148  | length=500 | 425 | 9e-115 |
| SRR2298546.251196  | 251196  | length=502 | 425 | 9e-115 |
| SRR2298546.245187  | 245187  | length=502 | 425 | 9e-115 |
| SRR2298546.222749  | 222749  | length=502 | 425 | 9e-115 |
| SRR2298546.157639  | 157639  | length=500 | 425 | 9e-115 |
| SRR2298546.126450  | 126450  | length=502 | 425 | 9e-115 |
| SRR2298546.99806   | 99806   | length=500 | 425 | 9e-115 |
| SRR2298546.97210   | 97210   | length=501 | 425 | 9e-115 |
| SRR2298546.95609   | 95609   | length=501 | 425 | 9e-115 |
| SRR2298546.66936   | 66936   | length=502 | 425 | 9e-115 |
| SRR2298546.54401   | 54401   | length=502 | 425 | 9e-115 |
| SRR2298546.35865   | 35865   | length=501 | 425 | 9e-115 |
| SRR2298546.32844   | 32844   | length=501 | 425 | 9e-115 |
| SRR2298546.26481   | 26481   | length=502 | 425 | 9e-115 |
| SRR2298382.120527  | 120527  | length=502 | 425 | 9e-115 |
| SRR2298382.82939   | 82939   | length=502 | 425 | 9e-115 |
| SRR2298578.1015405 | 1015405 | length=500 | 424 | 3e-114 |
| SRR2298578.709605  | 709605  | length=500 | 424 | 3e-114 |
| SRR2298578.324805  | 324805  | length=500 | 424 | 3e-114 |
| SRR2298578.152921  | 152921  | length=500 | 424 | 3e-114 |
| SRR2298578.127237  | 127237  | length=500 | 424 | 3e-114 |
| SRR2298578.101425  | 101425  | length=500 | 424 | 3e-114 |
| SRR2298578.37539   | 37539   | length=500 | 424 | 3e-114 |
| SRR2298578.35484   | 35484   | length=500 | 424 | 3e-114 |
| SRR2298573.877192  | 877192  | length=500 | 424 | 3e-114 |
| SRR2298573.875792  | 875792  | length=500 | 424 | 3e-114 |
| SRR2298573.875646  | 875646  | length=500 | 424 | 3e-114 |
| SRR2298573.865497  | 865497  | length=500 | 424 | 3e-114 |
| SRR2298573.848975  | 848975  | length=500 | 424 | 3e-114 |
| SRR2298573.846971  | 846971  | length=500 | 424 | 3e-114 |
| SRR2298573.840452  | 840452  | length=500 | 424 | 3e-114 |
| SRR2298573.822160  | 822160  | length=500 | 424 | 3e-114 |
| SRR2298573.820287  | 820287  | length=500 | 424 | 3e-114 |
| SRR2298573.818488  | 818488  | length=500 | 424 | 3e-114 |
| SRR2298573.813908  | 813908  | length=500 | 424 | 3e-114 |
| SRR2298573.810041  | 810041  | length=500 | 424 | 3e-114 |
| SRR2298573.807498  | 807498  | length=500 | 424 | 3e-114 |
| SRR2298573.802882  | 802882  | length=500 | 424 | 3e-114 |
| SRR2298573.798101  | 798101  | length=500 | 424 | 3e-114 |
| SRR2298573.793667  | 793667  | length=500 | 424 | 3e-114 |
| SRR2298573.793320  | 793320  | length=500 | 424 | 3e-114 |
| SRR2298573.777443  | 777443  | length=500 | 424 | 3e-114 |
| SRR2298573.776393  | 776393  | length=500 | 424 | 3e-114 |
| SRR2298573.775045  | 775045  | length=500 | 424 | 3e-114 |
| SRR2298573.773302  | 773302  | length=500 | 424 | 3e-114 |
| SRR2298573.766703  | 766703  | length=500 | 424 | 3e-114 |
| SRR2298573.762593  | 762593  | length=500 | 424 | 3e-114 |
| SRR2298573.761206  | 761206  | length=500 | 424 | 3e-114 |
| SRR2298573.755061  | 755061  | length=500 | 424 | 3e-114 |
| SRR2298573.744959  | 744959  | length=500 | 424 | 3e-114 |
| SRR2298573.742876  | 742876  | length=500 | 424 | 3e-114 |
| SRR2298573.738145  | 738145  | length=500 | 424 | 3e-114 |
| SRR2298573.728669  | 728669  | length=500 | 424 | 3e-114 |

|                   |        |            |     |        |
|-------------------|--------|------------|-----|--------|
| SRR2298573.726823 | 726823 | length=500 | 424 | 3e-114 |
| SRR2298573.724976 | 724976 | length=500 | 424 | 3e-114 |
| SRR2298573.724601 | 724601 | length=500 | 424 | 3e-114 |
| SRR2298573.714736 | 714736 | length=500 | 424 | 3e-114 |
| SRR2298573.708314 | 708314 | length=500 | 424 | 3e-114 |
| SRR2298573.705806 | 705806 | length=500 | 424 | 3e-114 |
| SRR2298573.700830 | 700830 | length=500 | 424 | 3e-114 |
| SRR2298573.696366 | 696366 | length=500 | 424 | 3e-114 |
| SRR2298573.688563 | 688563 | length=500 | 424 | 3e-114 |
| SRR2298573.685978 | 685978 | length=500 | 424 | 3e-114 |
| SRR2298573.685074 | 685074 | length=500 | 424 | 3e-114 |
| SRR2298573.682861 | 682861 | length=500 | 424 | 3e-114 |

>SRR2298578.40400 40400 length=500  
Length=500

Score = 499 bits (270), Expect = 5e-137  
Identities = 337/369 (91%), Gaps = 5/369 (1%)  
Strand=Plus/Plus

|       |      |                                                               |      |
|-------|------|---------------------------------------------------------------|------|
| Query | 2473 | ATTATTTCTTAAATTTCAAGTCCATGAATGTGGATATCTTTACTGTTTCTCACACTAAAG  | 2532 |
|       |      |                                                               |      |
| Sbjct | 1    | ATTATTTCTTAAATTTCAAGTCCATGAATGTGGATATCTTTACTGTTTCTCACACTAAGG  | 60   |
| Query | 2533 | TAGACAATCTATTTGGAAGAGCTTGGTTTTACCAGGAACACACTTTCACCGATGAGGGGC  | 2592 |
|       |      |                                                               |      |
| Sbjct | 61   | TAGACAACCTATTTGGAAGAGCTTGGTTTTACCAGGAACACACTTTCACCGATGAAGGGC  | 120  |
| Query | 2593 | AGTGGAGAGTTAATTTGGAATTTCCCGAAACAAGGCCATGGTTCACTTTCTTGCTATTCG  | 2652 |
|       |      |                                                               |      |
| Sbjct | 121  | AGTGGAGAGTTAGCTTAGAGTTCCCGAAACAAGGCCATGGTTCTGCTTTCATTGTTATTCG | 180  |
| Query | 2653 | CTTACTTCACAGGTGAATTTAAATATTCATGTTTTGTTCTGGCTGAAAAGGGATTCTTA   | 2712 |
|       |      |                                                               |      |
| Sbjct | 181  | CTTACTTTACAGGTGAACTAAATATTCATGTTCTGTTCTAGCTGAAAAGGGATTCTTA    | 240  |
| Query | 2713 | GAGT-----GGCCACACTTATGACACATCAGCAGACAGAGTTAATTTCTGTCATCCAA    | 2767 |
|       |      |                                                               |      |
| Sbjct | 241  | GAGTAGAAGGGCCACACCTATGACACATCAGCAAACAGAGTTAACTTCTGTCATCCAA    | 300  |
| Query | 2768 | TGGCGTTATTACAATCCAGCTGGAGAACAAATGACACTATCTGCACCCTACTACTCAA    | 2827 |
|       |      |                                                               |      |
| Sbjct | 301  | TGGCGTCATCACAATCCAGCCGAGAACAAATGACATTATCTGCACCCTACTACTCTAA    | 360  |
| Query | 2828 | TAAACCCCT                                                     | 2836 |
|       |      |                                                               |      |
| Sbjct | 361  | GAAATCCCT                                                     | 369  |

>SRR2298573.122301 122301 length=500  
Length=500

Score = 440 bits (238), Expect = 3e-119  
Identities = 251/257 (98%), Gaps = 1/257 (0%)  
Strand=Plus/Plus

|       |     |                                                              |     |
|-------|-----|--------------------------------------------------------------|-----|
| Query | 319 | GCCATCCTCTAGTAAGTTTGTGAGACGTCTGGTGACGTGTGGGAACTTATTGGAAGCAAC | 378 |
|       |     |                                                              |     |



```

Sbjct 1 GCCATCCTCTAGTAAGTTTGTGAGACGTCTGGTGACGTGTGGGAACTTATTGGAAACAAC 60
Query 379 ATTTTGCTGCAAAGCATCCTATTGCCAGCGGAACAACACCTGGTAACAGGTGCCTCTGGG 438
|||||
Sbjct 61 ATTTTGCTGTAAAGCATCCTATTGCCAGCGGAACAACACCTGGTAACAGGTGCCTCTGGG 120
Query 439 GCCAAAAGCCAAGGTCTAACAAACCCTTTAGGATTGGTTCTAAACCTGAGATGTTGTGGA 498
|||||
Sbjct 121 GCCAAAAGCCAAGGTTTAAACAAACCCTTTAGGATTGGTTCTAAACCTGAGATGTTGTGGA 180
Query 499 AGATACTTAGTACCTGCCGATCTGGTAGTACTGCAAACACTAGTTGTAAGGCCACGAAG 558
|||||
Sbjct 181 AGATACTTAGTACCTACCGATCTGGTAGTAGTGCAAACACTAGTTGTAAGGCCACGAAG 240
Query 559 GATGCCCAGAAGGTACC 575
|||||
Sbjct 241 GATGCCCAGA-GGTACC 256

```

Score = 420 bits (227), Expect = 4e-113  
Identities = 241/248 (97%), Gaps = 0/248 (0%)  
Strand=Plus/Minus

```

Query 328 TAGTAAGTTTGTGAGACGTCTGGTGACGTGTGGGAACTTATTGGAAGCAACATTTTGCTG 387
|||||
Sbjct 498 TAGTAAGTTTGGGGGACGTCTGGTGACGTGTGGGAACTTATTGGAACAACATTTTGCTG 439
Query 388 CAAAGCATCCTATTGCCAGCGGAACAACACCTGGTAACAGGTGCCTCTGGGGCCAAAAGC 447
|||||
Sbjct 438 TAAAGCATCCTATTGCCAGCGGAACAACACCTGGTAACAGGTGCCTCTGGGGCCAAAAGC 379
Query 448 CAAGGTCTAACAAACCCTTTAGGATTGGTTCTAAACCTGAGATGTTGTGGAAGATACTTA 507
|||||
Sbjct 378 CAAGGTTTAAACAAACCCTTTAGGATTGGTTCTAAACCTGAGATGTTGTGGAAGATACTTA 319
Query 508 GTACCTGCCGATCTGGTAGTACTGCAAACACTAGTTGTAAGGCCACGAAGGATGCCCG 567
|||||
Sbjct 318 GTACCTACCGATCTGGTAGTAGTGCAAACACTAGTTGTAAGGCCACGAAGGATGCCCG 259
Query 568 AAGGTACC 575
|||||
Sbjct 258 AAGGTACC 251

```

>SRR2298573.862030 862030 length=500  
Length=500

Score = 436 bits (236), Expect = 4e-118  
Identities = 246/251 (98%), Gaps = 0/251 (0%)  
Strand=Plus/Plus

```

Query 334 GTTTGTGAGACGTCTGGTGACGTGTGGGAACTTATTGGAAGCAACATTTTGCTGCAAAGC 393
|||||
Sbjct 1 GTTTGTGAGACGTCTGGTGACGTGTGGGAACTTATTGGAACAACATTTTGCTGTAAAGC 60
Query 394 ATCCTATTGCCAGCGGAACAACACCTGGTAACAGGTGCCTCTGGGGCCAAAAGCCAAGGT 453
|||||
Sbjct 61 ATCCTATTGCCAGCGGAACAACACCTGGTAACAGGTGCCTCTGGGGCCAAAAGCCAAGGT 120

```

```

Query 454 CTAACAAACCCCTTTAGGATTGGTTCTAAACCTGAGATGTTGTGGAAGATACTTAGTACCT 513
          |
Sbjct 121 TTAACAAACCCCTTTAGGATTGGTTCTAAACCTGAGATGTTGTGGAAGATACTTAGTACCT 180

Query 514 GCCGATCTGGTAGTACTGCAAACACTAGTTGTAAGGCCACGAAGGATGCCCAGAAGGTA 573
          |
Sbjct 181 ACCGATCTGGTAGTAGTGCAAACACTAGTTGTAAGGCCACGAAGGATGCCCAGAAGGTA 240

Query 574 CCCATAGGTAA 584
          |
Sbjct 241 CCCATAGGTAA 251

```

Score = 396 bits (214), Expect = 7e-106  
Identities = 232/241 (96%), Gaps = 0/241 (0%)  
Strand=Plus/Minus

```

Query 389 AAAGCATCCTATTGCCAGCGGAACAACACCTGGTAACAGGTGCCTCTGGGGCCAAAAGCC 448
          |
Sbjct 490 AAAGCCTCCTATTGCCCGGGGAACAACCCCGGGTAACAGGTGCCTCTGGGGCCAAAAGCC 431

Query 449 AAGGTCTAACAAACCCCTTTAGGATTGGTTCTAAACCTGAGATGTTGTGGAAGATACTTAG 508
          |
Sbjct 430 AAGGTTAACAAACCCCTTTAGGATTGGTTCTAAACCTGAGATGTTGTGGAAGATACTTAG 371

Query 509 TACCTGCCGATCTGGTAGTACTGCAAACACTAGTTGTAAGGCCACGAAGGATGCCCAGA 568
          |
Sbjct 370 TACCTACCGATCTGGTAGTAGTGCAAACACTAGTTGTAAGGCCACGAAGGATGCCCAGA 311

Query 569 AGGTACCCATAGGTAACAAGTGACACTATGGATCTGATCTGGGGCCAGGTACCTCTATCT 628
          |
Sbjct 310 AGGTACCCATAGGTAACAAGCGACACTATGGATCTGATCTGGGGCCAGGTACCTCTATCT 251

Query 629 T 629
          |
Sbjct 250 T 250

```

>SRR2298573.814921 814921 length=500  
Length=500

Score = 436 bits (236), Expect = 4e-118  
Identities = 246/251 (98%), Gaps = 0/251 (0%)  
Strand=Plus/Minus

```

Query 389 AAAGCATCCTATTGCCAGCGGAACAACACCTGGTAACAGGTGCCTCTGGGGCCAAAAGCC 448
          |
Sbjct 251 AAAGCATCCTATTGCCAGCGGAACAACACCTGGTAACAGGTGCCTCTGGGGCCAAAAGCC 192

Query 449 AAGGTCTAACAAACCCCTTTAGGATTGGTTCTAAACCTGAGATGTTGTGGAAGATACTTAG 508
          |
Sbjct 191 AAGGTTAACAAACCCCTTTAGGATTGGTTCTAAACCTGAGATGTTGTGGAAGATACTTAG 132

Query 509 TACCTGCCGATCTGGTAGTACTGCAAACACTAGTTGTAAGGCCACGAAGGATGCCCAGA 568
          |
Sbjct 131 TACCTACCGATCTGGTAGTAGTGCAAACACTAGTTGTAAGGCCACGAAGGATGCCCAGA 72

Query 569 AGGTACCCATAGGTAACAAGTGACACTATGGATCTGATCTGGGGCCAGGTACCTCTATCT 628
          |

```

Sbjct 71 AGGTACCCATAGGTAACAAGCGACACTATGGATCTGATCTGGGGCCAGGTACCTCTATCT 12  
Query 629 TGGTGACCTGG 639  
||||| ||||  
Sbjct 11 TGGTGATCTGG 1

Score = 398 bits (215), Expect = 2e-106  
Identities = 237/248 (96%), Gaps = 0/248 (0%)  
Strand=Plus/Plus

Query 289 TACCACGCTTGTGGACCTTATGCTCACACAGCCATCCTCTAGTAAGTTTGTGAGACGTCT 348  
||||| |  
Sbjct 251 TACCATGCTTGTGGACCTTATGCTCACACAGCCATCCTCTAGTAAGTTTGTGAGACGTCT 310

Query 349 GGTGACGTGTGGGAACCTTATTGGAAGCAACATTTTGCTGCAAAGCATCCTATTGCCAGCG 408  
|  
Sbjct 311 GGTGACGTGTGGGAACCTTATTGGAACAACATTTTGCTGTAAAGCATCCTATTGCCAGCG 370

Query 409 GAACAACACCTGGTAACAGGTGCCTCTGGGGCCAAAAGCCAAGGTCTAACAAAACCTTTA 468  
|  
Sbjct 371 GAACAACACCTGGTAACAGGTGCCTCTGGGGCCAAAACCCAAGGTTTAACAAAACCTTTA 430

Query 469 GGATTGGTTCTAAACCTGAGATGTTGTGGAAGATACTTAGTACCTGCCGATCTGGTAGTA 528  
|  
Sbjct 431 GGATTGGTTCTAAACCTGAGATGGTGTGGAAGATACTTAGTAACCTACCGATCTGGGAGGA 490

Query 529 CTGCAAAC 536  
|||||  
Sbjct 491 GTGCAAAC 498

>SRR2298573.595924 595924 length=500  
Length=500

Score = 436 bits (236), Expect = 4e-118  
Identities = 246/251 (98%), Gaps = 0/251 (0%)  
Strand=Plus/Minus

Query 396 CCTATTGCCAGCGGAACAACACCTGGTAACAGGTGCCTCTGGGGCCAAAAGCCAAGGTCT 455  
|  
Sbjct 251 CCTATTGCCAGCGGAACAACACCTGGTAACAGGTGCCTCTGGGGCCAAAAGCCAAGGTTT 192

Query 456 AACAAAACCTTTAGGATTGGTTCTAAACCTGAGATGTTGTGGAAGATACTTAGTACCTGC 515  
|  
Sbjct 191 AACAAAACCTTTAGGATTGGTTCTAAACCTGAGATGTTGTGGAAGATACTTAGTACCTAC 132

Query 516 CGATCTGGTAGTACTGCAAACACTAGTTGTAAGGCCACGAAGGATGCCAGAAAGGTACC 575  
|  
Sbjct 131 CGATCTGGTAGTACTGCAAACACTAGTTGTAAGGCCACGAAGGATGCCAGAAAGGTACC 72

Query 576 CATAGGTAACAAGTGACACTATGGATCTGATCTGGGGCCAGGTACCTCTATCTTGGTGAC 635  
|  
Sbjct 71 CATAGGTAACAAGCGACACTATGGATCTGATCTGGGGCCAGGTACCTCTATCTTGGTGAT 12

Query 636 CTGGTTAAAAA 646  
|||||  
Sbjct 11 CTGGTTAAAAA 1

Score = 418 bits (226), Expect = 2e-112  
Identities = 242/250 (97%), Gaps = 0/250 (0%)  
Strand=Plus/Plus

```
Query 345 GTCTGGTGACGTGTGGGAACCTTATTGGAAGCAACATTTTGCTGCAAAGCATCCTATTGCC 404
|||||
Sbjct 251 GTCTGGTGACGTGTGGGAACCTTATTGGAACAACATTTTGCTGTAAAGCATCCTATTGCC 310

Query 405 AGCGGAACAACACCTGGTAACAGGTGCCTCTGGGGCCAAAAGCCAAGGTCTAACAAAACCC 464
|||||
Sbjct 311 AGCGGAACAACACCTGGTAACAGGTGCCTCTGGGGCCAAAAGCCAAGGTTTAAACAAAACCC 370

Query 465 TTTAGGATTGGTTCTAAACCTGAGATGTTGTGGAAGATACTTAGTACCTGCCGATCTGGT 524
|||||
Sbjct 371 TTTAGGATTGGTTCTAAACCTGAGATGTTGTGGAAGATACTTAGTACCTACCGATCTGGT 430

Query 525 AGTACTGCAAACACTAGTTGTAAGGCCACGAAGGATGCCCAGAAGGTACCCATAGGTAA 584
|||||
Sbjct 431 AGTAGTGCAAACACTAGTTGTAAGGCCACGAAGGATGCCCAGAAGGAACCCATAGGGAA 490

Query 585 CAAGTGACAC 594
|||||
Sbjct 491 CAAGCGACAC 500
```

>SRR2298573.482382 482382 length=500  
Length=500

Score = 436 bits (236), Expect = 4e-118  
Identities = 246/251 (98%), Gaps = 0/251 (0%)  
Strand=Plus/Minus

```
Query 320 CCATCCTCTAGTAAGTTTGTGAGACGTCTGGTGACGTGTGGGAACCTTATTGGAAGCAACA 379
|||||
Sbjct 251 CCATCCTCTAGTAAGTTTGTGAGACGTCTGGTGACGTGTGGGAACCTTATTGGAACAACA 192

Query 380 TTTTGCTGCAAAGCATCCTATTGCCAGCGGAACAACACCTGGTAACAGGTGCCTCTGGGG 439
|||||
Sbjct 191 TTTTGCTGTAAAGCATCCTATTGCCAGCGGAACAACACCTGGTAACAGGTGCCTCTGGGG 132

Query 440 CAAAAGCCAAGGTCTAACAAACCCTTTAGGATTGGTTCTAAACCTGAGATGTTGTGGAA 499
|||||
Sbjct 131 CAAAAGCCAAGGTTTAAACAAACCCTTTAGGATTGGTTCTAAACCTGAGATGTTGTGGAA 72

Query 500 GATACTTAGTACCTGCCGATCTGGTAGTACTGCAAACACTAGTTGTAAGGCCACGAAGG 559
|||||
Sbjct 71 GATACTTAGTACCTACCGATCTGGTAGTACTGCAAACACTAGTTGTAAGGCCACGAAGG 12

Query 560 ATGCCCAGAAG 570
|||||
Sbjct 11 ATGCCCAGAAG 1
```

Score = 383 bits (207), Expect = 6e-102  
Identities = 231/243 (95%), Gaps = 0/243 (0%)  
Strand=Plus/Plus

```
Query 283 GTGAGATACCACGCTTGTGGACCTTATGCTCACACAGCCATCCTCTAGTAAGTTTGTGAG 342
```

```

Sbjct 251  |||
GTGAGATACCATGCTTGTGGACCTTATGCTCACACAGCCATCCTCTAGTAAGTTTGTGAG 310
Query 343  ACGTCTGGTGACGTGTGGGAACTTATTGGAAGCAACATTTTGCTGCAAAGCATCCTATTG 402
|||
Sbjct 311  ACGTCTGGTGACGTGTGGGAACTTATTGGAACAACATTTTGCTGTAAAGCATCCTATTG 370
Query 403  CCAGCGGAACAACACCTGGTAACAGGTGCCTCTGGGGCCAAAAGCCAAGGTCTAACAAAC 462
|||
Sbjct 371  CCAGCGGAACAACACCTGGTAACAGGTGCCTCTGGGGCCAAAAGCCAAGGTTTAAACAAAC 430
Query 463  CCTTTAGGATTGGTTCTAAACCTGAGATGTTGTGGAAGATACTTAGTACCTGCCGATCTG 522
|||
Sbjct 431  CCTTTAGGAATGGTCCTAAACCTGAGATGTAGTGAAGAACCTTAGAACCTACCGATTTG 490
Query 523  GTA 525
|||
Sbjct 491  GTA 493

```

>SRR2298573.51148 51148 length=500  
Length=500

Score = 436 bits (236), Expect = 4e-118  
Identities = 249/255 (98%), Gaps = 1/255 (0%)  
Strand=Plus/Plus

```

Query 322  ATCCTCTAGTAAGTTTGTGAGACGTCTGGTGACGTGTGGGAACTTATTGGAAGCAACATT 381
|||
Sbjct 1     ATCCTCTAGTAAGTTTGTGAGACGTCTGGTGACGTGTGGGAACTTATTGGAACAACATT 60
Query 382  TTGCTGCAAAGCATCCTATTGCCAGCGGAACAACACCTGGTAACAGGTGCCTCTGGGGCC 441
|||
Sbjct 61   TTGCTGTAAAGCATCCTATTGCCAGCGGAACAACACCTGGTAACAGGTGCCTCTGGGGCC 120
Query 442  AAAAGCCAAGGTCTAACAAACCCTTTAGGATTGGTTCTAAACCTGAGATGTTGTGGAAGA 501
|||
Sbjct 121  AAAAGCCAAGGTTTAAACAAACCCTTTAGGATTGGTTCTAAACCTGAGATGTTGTGGAAGA 180
Query 502  TACTTAGTACCTGCCGATCTGGTAGTACTGCAAACACTAGTTGTAAGGCCACGAAGGAT 561
|||
Sbjct 181  TACTTAGTACCTACCGATCTGGTAGTAGTCAAACACTAGTTGTAAGGCCACGAAGGAT 240
Query 562  GCCCAGAAGG-TACC 575
|||
Sbjct 241  GCCCAGAAGGGTACC 255

```

Score = 409 bits (221), Expect = 9e-110  
Identities = 248/261 (95%), Gaps = 2/261 (1%)  
Strand=Plus/Minus

```

Query 371  GAAGCAACATTTTGCTGCAAAGCATCCTATTGCCAGCGGAACAACACCTGGTAACAGGTG 430
|||
Sbjct 500  GAAACAACATTTTGCTGTAAAGCCTCCTTTTGCCAGCGGACCAACACCTGGTAACAGGTG 441
Query 431  CCTCTGGGGCCAAAAGCCAAGGTCTAACAAACCCTTTAGGATTGGTTCTAAACCTGAGAT 490
|||
Sbjct 440  CCTCTGGGGCCAAAAGCCAAGGTTTAAACAAACCCTTTAGGATTGGTTCTAAACCTGAGAT 381

```

```

Query 491 GTTGTGGAAGATACTTAGTACCTGCCGATCTGGTAGTACTGCAAACACTAGTTGTAAGGC 550
          |||
Sbjct 380 GTTGTGGAAGATACTTAGTACCTACCGATCTGGTAGTAGTGCAAACACTAGTTGTAAGGC 321

Query 551 CCACGAAGGATGCCCAGAAGGTACCCATAGGTAACAAGTGACACTATGGATCTGATCTGG 610
          |||
Sbjct 320 CCACGAAGGATGCCCAGAAGGTACCCATAGGTAACAAGCGACACTATGGATCTGATCTGG 261

Query 611 GGCCAGGTACCTCTATCTTGG 631
          |||
Sbjct 260 GGCCAGGTACC-CT-TCTGGG 242

```

>SRR2298546.826318 826318 length=501  
Length=501

Score = 436 bits (236), Expect = 4e-118  
Identities = 248/254 (98%), Gaps = 0/254 (0%)  
Strand=Plus/Plus

```

Query 1252 GTGCATTGGTGGTGTATGAACCCAAACCTGTTGTGACATATGACTCAAAGTTAGAATTTG 1311
          |||
Sbjct 1     GTGCATTGGTGGTGTATGAACCCAAACCTGTTGTGACATATGACTCAAAGTTAGAATTTG 60

Query 1312 GAGCATTTACCAATTTACCACATGTATTGATGAATTTGGCTGAGACCACACAGGCTGATT 1371
          |||
Sbjct 61     GAGCGTTTACCAATTTACCACATGTGTTGATGAATTTGGCTGAGACCACACAGGCTGATT 120

Query 1372 TATGTATCCCCTATGTTGCTGACACAAACTATGTTAAAACGGATTCGTCAGACTTAGGGC 1431
          |||
Sbjct 121    TATGTATCCCCTATGTTGCTGACACAAACTATGTTAAAACAGATTCGTCAGACTTAGGGC 180

Query 1432 AACTAAAAGTCTATGTTTGGACACCTTTATCTATACCTTCAGGTTCTGCGACACAAGTTG 1491
          |||
Sbjct 181    AACTAAAAGTCTATGTTTGGACACCTTTATCCATACCTTCAGGTTCTGCTACACAAGTTG 240

Query 1492 ATGTAACCATATTG 1505
          |||
Sbjct 241    ATGTTACCATATTG 254

```

Score = 387 bits (209), Expect = 4e-103  
Identities = 237/251 (94%), Gaps = 0/251 (0%)  
Strand=Plus/Minus

```

Query 1365 GCTGATTTATGTATCCCCTATGTTGCTGACACAAACTATGTTAAAACGGATTCGTCAGAC 1424
          |||
Sbjct 501    GCTGATTTATGTATCCCCTATGTTGCTGACACAAACTATGTTAAAACAGATTCGTCAGAC 442

Query 1425 TTAGGGCAACTAAAAGTCTATGTTTGGACACCTTTATCTATACCTTCAGGTTCTGCGACA 1484
          |||
Sbjct 441    TTAGGGCAACTAAAAGTCTATGTTTGGACACCTTTATCCATACCTTCAGGTTCTGCTACA 382

Query 1485 CAAGTTGATGTAACCATATTGGGTAGTTTATTGCAATTGGACTTCCAAAATCCTAGGGTG 1544
          |||
Sbjct 381    CAAGTTGATGTTACCATATTGGGTAGCTTATTGCAATTGGACTTCCAAAATCCTCGGGTA 322

Query 1545 TTTGGCCAAGACGTTGGTATCTATGATAATGCACCAACGCGAAACAAAATCTTAAAAAG 1604

```



>SRR2298573.724260 724260 length=500  
Length=500

Score = 435 bits (235), Expect = 2e-117  
Identities = 245/250 (98%), Gaps = 0/250 (0%)  
Strand=Plus/Plus

```
Query 303 ACCTTATGCTCACACAGCCATCCTCTAGTAAGTTTGTGAGACGTCTGGTGACGTGTGGGA 362
          |||
Sbjct 251 ACCTTATGCTCACACAGCCATCCTCTAGTAAGTTTGTGAGACGTCTGGTGACGTGTGGGA 310

Query 363 ACTTATTGGAAGCAACATTTTGTCTGCAAAGCATCCTATTGCCAGCGGAACAACACCTGGT 422
          |||
Sbjct 311 ACTTATTGGAACAACATTTTGTCTGTAAGCATCCTATTGCCAGCGGAACAACACCTGGT 370

Query 423 AACAGGTGCCTCTGGGGCCAAAAGCCAAGGTCTAACAAACCCTTTAGGATTGGTTCTAAA 482
          |||
Sbjct 371 AACAGGTGCCTCTGGGGCCAAAAGCCAAGGTCTAACAAACCCTTTAGGATTGGTTCTAAA 430

Query 483 CCTGAGATGTTGTGGAAGATACTTAGTACCTGCCGATCTGGTAGTACTGCAAACACTAGT 542
          |||
Sbjct 431 CCTGAGATGTTGTGGAAGATACTTAGTACCTACCGATCTGGTAGTACTGCAAACACTAGT 490

Query 543 TGTAAGGCC 552
          |||
Sbjct 491 TGTAAGGCC 500
```

Score = 422 bits (228), Expect = 1e-113  
Identities = 242/249 (97%), Gaps = 0/249 (0%)  
Strand=Plus/Minus

```
Query 309 TGCTCACACAGCCATCCTCTAGTAAGTTTGTGAGACGTCTGGTGACGTGTGGGAACTTAT 368
          |||
Sbjct 249 TGCCCACACAGGCATCCTCTAGTAAGTTTGTGAGACGTCTGGTGACGTGTGGGAACTTAT 190

Query 369 TGGAAAGCAACATTTTGTCTGCAAAGCATCCTATTGCCAGCGGAACAACACCTGGTAACAGG 428
          |||
Sbjct 189 TGGAAACAACATTTTGTCTGTAAGCATCCTATTGCCAGCGGAACAACACCTGGTAACAGG 130

Query 429 TGCCTCTGGGGCCAAAAGCCAAGGTCTAACAAACCCTTTAGGATTGGTTCTAAACCTGAG 488
          |||
Sbjct 129 TGCCTCTGGGGCCAAAAGCCAAGGTCTAACAAACCCTTTAGGATTGGTTCTAAACCTGAG 70

Query 489 ATGTTGTGGAAGATACTTAGTACCTGCCGATCTGGTAGTACTGCAAACACTAGTTGTAAG 548
          |||
Sbjct 69 ATGTTGTGGAAGATACTTAGTACCTACCGATCTGGTAGTACTGCAAACACTAGTTGTAAG 10

Query 549 GCCACGAA 557
          |||
Sbjct 9 GCCACGAA 1
```

>SRR2298573.708355 708355 length=500  
Length=500

Score = 435 bits (235), Expect = 2e-117



Identities = 245/250 (98%), Gaps = 0/250 (0%)  
Strand=Plus/Plus

```
Query 326 TCTAGTAAGTTTGTGAGACGTCTGGTGACGTGTGGGAACCTATTGGAAAGCAACATTTTGC 385
|||||
Sbjct 1 TCTAGTAAGTTTGTGAGACGTCTGGTGACGTGTGGGAACCTATTGGAAACAACATTTTGC 60

Query 386 TGCAAAGCATCCTATTGCCAGCGGAACAACACCTGGTAACAGGTGCCTCTGGGGCCAAAA 445
|||
Sbjct 61 TGTAAGCATCCTATTGCCAGCGGAACAACACCTGGTAACAGGTGCCTCTGGGGCCAAAA 120

Query 446 GCCAAGGTCTAACAAACCCTTTAGGATTGGTTCTAAACCTGAGATGTTGTGGAAGATACT 505
|||||
Sbjct 121 GCCAAGGTCTAACAAACCCTTTAGGATTGGTTCTAAACCTGAGATGTTGTGGAAGATACT 180

Query 506 TAGTACCTGCCGATCTGGTAGTACTGCAAACACTAGTTGTAAGGCCACGAAGGATGCC 565
|||||
Sbjct 181 TAGTACCTACCGATCTGGTAGTACTGCAAACACTAGTTGTAAGGCCACGAAGGATGCC 240

Query 566 AGAAGGTACC 575
|||||
Sbjct 241 AGAAGGTACC 250
```

Score = 420 bits (227), Expect = 4e-113  
Identities = 239/245 (98%), Gaps = 0/245 (0%)  
Strand=Plus/Minus

```
Query 358 TGGGAACCTATTGGAAAGCAACATTTTGTGCTGCAAAGCATCCTATTGCCAGCGGAACAACAC 417
|||||
Sbjct 495 TGGGAACCTATTGGAAACAACATTTTGTGCTGCAAAGCATCCTATTGCCAGCGGAACAACAC 436

Query 418 CTGGTAACAGGTGCCTCTGGGGCCAAAAGCCAAGGTCTAACAAACCCTTTAGGATTGGTT 477
|||||
Sbjct 435 CTGGTAACAGGTGCCTCTGGGGCCAAAAGCCAAGGTCTAACAAACCCTTTAGGATTGGTT 376

Query 478 CTAAACCTGAGATGTTGTGGAAGATACTTAGTACCTGCCGATCTGGTAGTACTGCAAACA 537
|||||
Sbjct 375 CTAAACCTGAGATGTTGTGGAAGATACTTAGTACCTACCGATCTGGTAGTACTGCAAACA 316

Query 538 CTAGTTGTAAGGCCACGAAGGATGCCCAGAAGGTACCCATAGGTAACAAGTGACACTAT 597
|||||
Sbjct 315 CTAGTTGTAAGGCCACGAAGGATGCCCAGAAGGTACCCATAGGTAACAAGTGACACTAT 256

Query 598 GGATC 602
|||||
Sbjct 255 GGATC 251
```

>SRR2298573.664456 664456 length=500  
Length=500

Score = 435 bits (235), Expect = 2e-117  
Identities = 245/250 (98%), Gaps = 0/250 (0%)  
Strand=Plus/Minus

```
Query 454 CTAACAAACCCTTTAGGATTGGTTCTAAACCTGAGATGTTGTGGAAGATACTTAGTACCT 513
|||||
Sbjct 251 CTAACAAACCCTTTAGGATTGGTTCTAAACCTGAGATGTTGTGGAAGATACTTAGTACCT 192
```





Query 622 TCTATCTTGG 631  
|||||  
Sbjct 260 TCTATCTTGG 251

Score = 414 bits (224), Expect = 2e-111  
Identities = 236/242 (98%), Gaps = 0/242 (0%)  
Strand=Plus/Plus

Query 276 TCTACTAGTGAGATACCACGCTTGTGGACCTTATGCTCACACAGCCATCCTCTAGTAAGT 335  
|||||  
Sbjct 9 TCTATTAGTGAGATACCATGCTTGTGGACCTTATGCTCACACAGCCATCCTCTAGTAAGT 68

Query 336 TTGTGAGACGTCTGGTGACGTGTGGAACTTATTGGAAGCAACATTTTGCTGCAAAGCAT 395  
|||||  
Sbjct 69 TTGTGAGACGTCTGGTGACGTGTGGAACTTATTGGAACAACATTTTGCTGTAAAGCAT 128

Query 396 CCTATTGCCAGCGGAACAACACCTGGTAACAGGTGCCTCTGGGGCCAAAAGCCAAGGTCT 455  
|||||  
Sbjct 129 CCTATTGCCAGCGGAACAACACCTGGTAACAGGTGCCTCTGGGGCCAAAAGCCAAGGTTT 188

Query 456 AACAAACCCTTTAGGATTGGTTCTAAACCTGAGATGTTGTGGAAGATACTTAGTACCTGC 515  
|||||  
Sbjct 189 AACAAACCCTTTAGGATTGGTTCTAAACCTGAGATGTTGTGGAAGATACTTAGTACCTAC 248

Query 516 CG 517  
||  
Sbjct 249 CG 250

>SRR2298573.512385 512385 length=500  
Length=500

Score = 435 bits (235), Expect = 2e-117  
Identities = 247/253 (98%), Gaps = 0/253 (0%)  
Strand=Plus/Minus

Query 347 CTGGTGACGTGTGGAACTTATTGGAAGCAACATTTTGCTGCAAAGCATCCTATTGCCAG 406  
|||||  
Sbjct 253 CTGGTGACGTGTGGAACTTATTGGAACAACATTTTGCTGTAAAGCATCCTATTGCCAG 194

Query 407 CGGAACAACACCTGGTAACAGGTGCCTCTGGGGCCAAAAGCCAAGGTCTAACAAACCCTT 466  
|||||  
Sbjct 193 CGGAACAACACCTGGTAACAGGTGCCTCTGGGGCCAAAAGCCAAGGTTTAAACAACCCTT 134

Query 467 TAGGATTGGTTCTAAACCTGAGATGTTGTGGAAGATACTTAGTACCTGCCGATCTGGTAG 526  
|||||  
Sbjct 133 TAGGATTGGTTCTAAACCTGAGATGTTGTGGAAGATACTTAGTACCTACCGATCTGGTAG 74

Query 527 TACTGCAAACACTAGTTGTAAGGCCACGAAGGATGCCAGAAGGTACCCATAGGTAACA 586  
||  
Sbjct 73 TAGTGCAAACACTAGTTGTAAGGCCACGAAGGATGCCAGAAGGTACCCATAGGTAACA 14

Query 587 AGTGACACTATGG 599  
||  
Sbjct 13 AGCGACACTATGG 1







Sbjct 320 CCAGAAGGTACCCATAGGTAACAAGCGACACTATGGATCTGATCTGGGGCCAGGTACCTC 261  
 Query 624 TATCTTGGTG-ACC 636  
 |||||  
 Sbjct 260 TATCTTGGTGCACC 247

>SRR2298573.165720 165720 length=500  
 Length=500

Score = 435 bits (235), Expect = 2e-117  
 Identities = 245/250 (98%), Gaps = 0/250 (0%)  
 Strand=Plus/Plus

Query 309 TGCTCACACAGCCATCCTCTAGTAAGTTTGTGAGACGTCTGGTGACGTGTGGGAACCTTAT 368  
 |||||  
 Sbjct 1 TGCTCACACAGCCATCCTCTAGTAAGTTTGTGAGACGTCTGGTGACGTGTGGGAACCTTAT 60  
 Query 369 TGGAAAGCAACATTTTGTGCTGCAAAGCATCCTATTGCCAGCGGAACAACACCTGGTAACAGG 428  
 |||||  
 Sbjct 61 TGGAAACAACATTTTGTGCTGTAAGCATCCTATTGCCAGCGGAACAACACCTGGTAACAGG 120  
 Query 429 TGCCTCTGGGGCCAAAAGCCAAGGTCTAACAAACCCTTTAGGATTGGTTCTAAACCTGAG 488  
 |||||  
 Sbjct 121 TGCCTCTGGGGCCAAAAGCCAAGGTTTAACAAACCCTTTAGGATTGGTTCTAAACCTGAG 180  
 Query 489 ATGTTGTGGAAGATACTTAGTACCTGCCGATCTGGTAGTACTGCAAACACTAGTTGTAAG 548  
 |||||  
 Sbjct 181 ATGTTGTGGAAGATACTTAGTACCTACCGATCTGGTAGTACTGCAAACACTAGTTGTAAG 240  
 Query 549 GCCCACGAAG 558  
 |||||  
 Sbjct 241 GCCCACGAAG 250

Score = 407 bits (220), Expect = 3e-109  
 Identities = 240/250 (96%), Gaps = 0/250 (0%)  
 Strand=Plus/Minus

Query 321 CATCCTCTAGTAAGTTTGTGAGACGTCTGGTGACGTGTGGGAACCTTATTGGAAGCAACAT 380  
 |||||  
 Sbjct 500 CATCCTCTAGTAAGTTTGTGAGACGGTGGGTGACGTGTGGGAACCTAATGGAAACAACAT 441  
 Query 381 TTTGCTGCAAAGCATCCTATTGCCAGCGGAACAACACCTGGTAACAGGTGCCTCTGGGGC 440  
 |||||  
 Sbjct 440 TTTGCTGTAAGCATCCTATTGCCAGCGGAACAACACCTGGTAACAGGTTCTCTGGGGC 381  
 Query 441 CAAAAGCCAAGGTCTAACAAACCCTTTAGGATTGGTTCTAAACCTGAGATGTTGTGGAAG 500  
 |||||  
 Sbjct 380 CAAAAGCCAAGGTTAACAAACCCTTTAGGATTGGTTCTAAACCTGAGATGTTGTGGAAG 321  
 Query 501 ATACTTAGTACCTGCCGATCTGGTAGTACTGCAAACACTAGTTGTAAGGCCACGAAGGA 560  
 |||||  
 Sbjct 320 ATACTTAGTACCTACCGATCTGGTAGTACTGCAAACACTAGTTGTAAGGCCACGAAGGA 261  
 Query 561 TGCCCAGAAG 570  
 |||||  
 Sbjct 260 TGCCCAGAAG 251



>SRR2298573.147826 147826 length=500  
Length=500

Score = 435 bits (235), Expect = 2e-117  
Identities = 245/250 (98%), Gaps = 0/250 (0%)  
Strand=Plus/Plus

```
Query 420 GGTAACAGGTGCCCTCTGGGGCCAAAAGCCAAGGTCTAACAAACCCTTTAGGATTGGTTCT 479
          |||
Sbjct 1 GGTAACAGGTGCCCTCTGGGGCCAAAAGCCAAGGTCTAACAAACCCTTTAGGATTGGTTCT 60

Query 480 AAACCTGAGATGTTGTGGAAGATACTTAGTACCTGCCGATCTGGTAGTACTGCAAACACT 539
          |||
Sbjct 61 AAACCTGAGATGTTGTGGAAGATACTTAGTACCTACCGATCTGGTAGTACTGCAAACACT 120

Query 540 AGTTGTAAGGCCACGAAGGATGCCCAGAAGGTACCCATAGGTAACAAGTGACACTATGG 599
          |||
Sbjct 121 AGTTGTAAGGCCACGAAGGATGCCCAGAAGGTACCCATAGGTAACAAGCGACACTATGG 180

Query 600 ATCTGATCTGGGGCCAGGTACCTCTATCTTGGTGACCTGGTTAAAAAGCGTCTAGTGGGC 659
          |||
Sbjct 181 ATCTGATCTGGGGCCAGGTACCTCTATCTTGGTGATCTGGTTAAAAAACGTCTAGTGGGC 240

Query 660 CAAACCCggg 669
          |||
Sbjct 241 CAAACCCGGG 250
```

Score = 326 bits (176), Expect = 1e-84  
Identities = 220/242 (91%), Gaps = 0/242 (0%)  
Strand=Plus/Minus

```
Query 636 CTGGTTAAAAAGCGTCTAGTGGGCCAAACCCgggggggATCCCGGTTTCCTTTTATTTT 695
          |||
Sbjct 492 CTGGTTAAAAAACCTTTTGTGGGCCAAACCCGGGGGGTTCCCGGTTTCCTTTTATTTT 433

Query 696 ATCAATGCTACAATGGAGACAATTAAGATATTGCAGATATGGCGACCGGAGTGGTCAGT 755
          |||
Sbjct 432 AACCATGCCACTATGGAGACAATTAAGAGTTTGCAGATATGGCGACCGGAGTGGTCAGT 373

Query 756 TCAGTTGATTCCACTATCAATGCAGTTAATGAGAGAGTAGAAAATGTGGGCAATGAAATT 815
          |||
Sbjct 372 TCAGTTGATTCCACTATCAATGTAGTTAATGAGAGAGTGAAAATGTAGGTAATGAAATT 313

Query 816 GGAGGTAACCTATTAACCAAAGTAGCAGATGATGCTTCTAATGTGCTTGGACCAAATTGT 875
          |||
Sbjct 312 GGAGGTAATTTATTAACCAAAGTTGCAGATGATGCTTCTAATGTGCTCGGACCAAATTGC 253

Query 876 TA 877
          ||
Sbjct 252 TA 251
```

>SRR2298573.138574 138574 length=500  
Length=500

Score = 435 bits (235), Expect = 2e-117  
Identities = 245/250 (98%), Gaps = 0/250 (0%)

Strand=Plus/Minus

```
Query 382 TTGCTGCAAAGCATCCTATTGCCAGCGGAACAACACCTGGTAACAGGTGCCTCTGGGGCC 441
      |||||
Sbjct 500 TTGCTGTAAAGCATCCTATTGCCAGCGGAACAACACCTGGTAACAGGTGCCTCTGGGGCC 441

Query 442 AAAAGCCAAGGTCTAACAAACCCCTTTAGGATTGGTTCTAAACCTGAGATGTTGTGGAAGA 501
      |||||
Sbjct 440 AAAAGCCAAGGTTAACAAACCCCTTTAGGATTGGTTCTAAACCTGAGATGTTGTGGAAGA 381

Query 502 TACTTAGTACCTGCCGATCTGGTAGTACTGCAAACACTAGTTGTAAGGCCACGAAGGAT 561
      |||||
Sbjct 380 TACTTAGTACCTACCGATCTGGTAGTACTGCAAACACTAGTTGTAAGGCCACGAAGGAT 321

Query 562 GCCCAGAAGGTACCCATAGGTAACAAGTGACACTATGGATCTGATCTGGGGCCAGGTACC 621
      |||||
Sbjct 320 GCCCAGAAGGTACCCATAGGTAACAAGCGACACTATGGATCTGATCTGGGGCCAGGTACC 261

Query 622 TCTATCTTGG 631
      |||||
Sbjct 260 TCTATCTTGG 251
```

Score = 407 bits (220), Expect = 3e-109  
Identities = 239/248 (96%), Gaps = 1/248 (0%)  
Strand=Plus/Plus

```
Query 330 GTA-AGTTTGTGAGACGTCTGGTGACGTGTGGGAACTTATTGGAAGCAACATTTTGCTGC 388
      |||
Sbjct 4 GTATAGTTTGTGAGACGTCTGGTGACGTGTGGGAACTTATTGGAACAACATTTTGCTGT 63

Query 389 AAAGCATCCTATTGCCAGCGGAACAACACCTGGTAACAGGTGCCTCTGGGGCCAAAAGCC 448
      |||||
Sbjct 64 AAAGCATCCTATTGCCAGCGGAACAACACCTGGTAACAGGTGCCTCTGGGGCCAAAAGCC 123

Query 449 AAGGTCTAACAAACCCCTTTAGGATTGGTTCTAAACCTGAGATGTTGTGGAAGATACTTAG 508
      |||||
Sbjct 124 AAGGTTTAAACAAACCCCTTTAGGATTGGTTCTAAACCTGAGATGTTGTGGAAGATACTTAG 183

Query 509 TACCTGCCGATCTGGTAGTACTGCAAACACTAGTTGTAAGGCCACGAAGGATGCCCAGA 568
      |||||
Sbjct 184 TACCTACCGATCTGGTAGTACTGCAAACCCCTAGTTGTAAGGCCAACGAAGGATGCCCAGA 243

Query 569 AGGTACCC 576
      ||| ||||
Sbjct 244 AGGAACCC 251
```

>SRR2298573.114824 114824 length=500  
Length=500

Score = 435 bits (235), Expect = 2e-117  
Identities = 245/250 (98%), Gaps = 0/250 (0%)  
Strand=Plus/Minus

```
Query 382 TTGCTGCAAAGCATCCTATTGCCAGCGGAACAACACCTGGTAACAGGTGCCTCTGGGGCC 441
      |||||
Sbjct 250 TTGCTGTAAAGCATCCTATTGCCAGCGGAACAACACCTGGTAACAGGTGCCTCTGGGGCC 191
```

```

Query 442 AAAAGCCAAGGTCTAACAAACCCTTTAGGATTGGTTCTAAACCTGAGATGTTGTGGAAGA 501
          |||
Sbjct 190 AAAAGCCAAGGTTTAAACAAACCCTTTAGGATTGGTTCTAAACCTGAGATGTTGTGGAAGA 131

Query 502 TACTTAGTACCTGCCGATCTGGTAGTACTGCAAACACTAGTTGTAAGGCCACGAAGGAT 561
          |||
Sbjct 130 TACTTAGTACCTACCGATCTGGTAGTACTGCAAACACTAGTTGTAAGGCCACGAAGGAT 71

Query 562 GCCCAGAAGGTACCCATAGGTAACAAGTGACACTATGGATCTGATCTGGGGCCAGGTACC 621
          |||
Sbjct 70 GCCCAGAAGGTACCCATAGGTAACAAGCGACACTATGGATCTGATCTGGGGCCAGGTACC 11

Query 622 TCTATCTTGG 631
          |||
Sbjct 10 TCTATCTTGG 1

```

Score = 435 bits (235), Expect = 2e-117  
Identities = 245/250 (98%), Gaps = 0/250 (0%)  
Strand=Plus/Plus

```

Query 327 CTAGTAAGTTTGTGAGACGTCTGGTGACGTGTGGGAACTTATTGGAAGCAACATTTTGCT 386
          |||
Sbjct 251 CTAGTAAGTTTGTGAGACGTCTGGTGACGTGTGGGAACTTATTGGAACAACATTTTGCT 310

Query 387 GCAAAGCATCCTATTGCCAGCGGAACAACACCTGGTAACAGGTGCCTCTGGGGCCAAAAG 446
          |
Sbjct 311 GTAAAGCATCCTATTGCCAGCGGAACAACACCTGGTAACAGGTGCCTCTGGGGCCAAAAG 370

Query 447 CCAAGGTCTAACAAACCCTTTAGGATTGGTTCTAAACCTGAGATGTTGTGGAAGATACTT 506
          |||
Sbjct 371 CCAAGGTTTAAACAAACCCTTTAGGATTGGTTCTAAACCTGAGATGTTGTGGAAGATACTT 430

Query 507 AGTACCTGCCGATCTGGTAGTACTGCAAACACTAGTTGTAAGGCCACGAAGGATGCCCA 566
          |||
Sbjct 431 AGTACCTACCGATCTGGTAGTACTGCAAACACTAGTTGTAAGGCCACGAAGGATGCCCA 490

Query 567 GAAGGTACCC 576
          |||
Sbjct 491 GAAGGTACCC 500

```

>SRR2298573.95695 95695 length=500  
Length=500

Score = 435 bits (235), Expect = 2e-117  
Identities = 245/250 (98%), Gaps = 0/250 (0%)  
Strand=Plus/Plus

```

Query 303 ACCTTATGCTCACACAGCCATCCTCTAGTAAGTTTGTGAGACGTCTGGTGACGTGTGGGA 362
          |||
Sbjct 1 ACCTTATGCTCACACAGCCATCCTCTAGTAAGTTTGTGAGACGTCTGGTGACGTGTGGGA 60

Query 363 ACTTATTGGAAGCAACATTTTGCTGCAAAGCATCCTATTGCCAGCGGAACAACACCTGGT 422
          |||
Sbjct 61 ACTTATTGGAACAACATTTTGCTGTAAAGCATCCTATTGCCAGCGGAACAACACCTGGT 120

Query 423 AACAGGTGCCTCTGGGGCCAAAAGCCAAGGTCTAACAAACCCTTTAGGATTGGTTCTAAA 482
          |||

```

```

Sbjct 121 AACAGGTGCCTCTGGGGCCAAAAGCCAAGGTTTAAACAAAACCCCTTTAGGATTGGTTCTAAA 180
Query 483 CCTGAGATGTTGTGGAAGATACTTAGTACCTGCCGATCTGGTAGTACTGCAAACACTAGT 542
      |||
Sbjct 181 CCTGAGATGTTGTGGAAGATACTTAGTACCTACCGATCTGGTAGTAGTGCAAACACTAGT 240
Query 543 TGTAAGGCC 552
      |||
Sbjct 241 TGTAAGGCC 250

```

Score = 327 bits (177), Expect = 3e-85  
Identities = 226/250 (90%), Gaps = 1/250 (0%)  
Strand=Plus/Minus

```

Query 420 GGTAACAGGTGCCTCTGGGGCCAAAAGCCAAGGTCTAACAAAACCCCTTTAGGATTGGTTCT 479
      |||
Sbjct 496 GGTAACAGGTGCCTCTGGGGCCAAAAGCCAAGGTTTAAAAAACCCCTTTGGGATTGGTTCT 437
Query 480 AAACCTGAGATGTTGTGGAAGATACTTAGTACCTGCCGATCTGGTAGTACTGCAAACACT 539
      |||
Sbjct 436 AAACCTGAAATTGTGTGGAAGATACTTAGTTCTACCGATCTGGTAGTAGTGCAAACGCG 377
Query 540 AGTTGTAAGGCCACGAAGGATGCCCGAAGGTACCCATAGGTAACAAGTGACACTATGG 599
      |||
Sbjct 376 AGTGGTAAGGCCACGAAGGATGCCCGAAGGTACCCATAGGTAACAAGCGACACTATGG 317
Query 600 ATCTGATCTGGGGCCAGGTACCTCTATCTTGGTGACCTGGTTAAAAAGCGTCTAGTGGGC 659
      |||
Sbjct 316 ATCTGATCTGGGGCCAGGTACCTCTATCTTGGTGATCTGGTTAAAAAACGTCTAGTGGGC 257
Query 660 CAAACCCggg 669
      |||
Sbjct 256 CAAACC-GGG 248

```

>SRR2298566.272602 272602 length=500  
Length=500

Score = 435 bits (235), Expect = 2e-117  
Identities = 245/250 (98%), Gaps = 0/250 (0%)  
Strand=Plus/Minus

```

Query 1226 GAATGTTAACCAAGGAACAGCTGGTAGTGCATTGGTGGTGTATGAACCCAAACCTGTTGT 1285
      |||
Sbjct 500 GAATGTTAATCAAGGAACAGCTGGTAGTGCATTGGTGGTGTATGAACCCAAACCTGTTGT 441
Query 1286 GACATATGACTCAAAGTTAGAATTTGGAGCATTTACCAATTTACCACATGTATTGATGAA 1345
      |||
Sbjct 440 GACATATGACTCAAAGTTAGAATTTGGAGCATTTACCAATCTACCACATGTGTTGATGAA 381
Query 1346 TTTGGCTGAGACCACACAGGCTGATTTATGTATCCCCTATGTTGCTGACACAAACTATGT 1405
      |||
Sbjct 380 TTTGGCTGAGACCACACAGGCTGATTTATGTATCCCCTATGTTGCTGACACAAACTATGT 321
Query 1406 TAAAACGGATTTCGTCAGACTTAGGGCAACTAAAAGTCTATGTTTGGACACCTTTATCTAT 1465
      |||
Sbjct 320 TAAAACAGATTTCGTCAGACTTAGGGCAACTAAAAGTCTATGTTTGGACACCTTTATCCAT 261

```

Query 1466 ACCTTCAGGT 1475  
 |||||  
 Sbjct 260 ACCTTCAGGT 251

Score = 401 bits (217), Expect = 2e-107  
 Identities = 239/250 (96%), Gaps = 0/250 (0%)  
 Strand=Plus/Plus

Query 1176 TCAAGATACTTTGCAGCAGTACGGTGTGGCTTTTCATTTTCAGGTGCAAGTGAATGTTAAC 1235  
 |||||  
 Sbjct 1 TCAAGATACTTTGCAGCAGTACGGTGTGGTTTTTCATTTTCAAGTACAAGTGAATGTTAAT 60

Query 1236 CAAGGAACAGCTGGTAGTGCATTGGTGGTGTATGAACCCAAACCTGTTGTGACATATGAC 1295  
 |||||  
 Sbjct 61 CAAGGAACAGCTGGTAGTGCATTGGTGGTGTATGAACCCAAACCTGTTGTGACATATGAC 120

Query 1296 TCAAAGTTAGAATTTGGAGCATTACCAATTTACCACATGTATTGATGAATTTGGCTGAG 1355  
 |||||  
 Sbjct 121 TCAAAGTTAGAATTTGGAGCATTACCAATCTACCACATGTGTTGATGAATTTGGCTGAG 180

Query 1356 ACCACACAGGCTGATTTATGTATCCCCTATGTTGCTGACACAAACTATGTTAAACGGAT 1415  
 |||||  
 Sbjct 181 ACAACACAGGCTGATTTATGTATCCCCTATGTTGCTGCCACAAACAATGTTAAACAGAT 240

Query 1416 TCGTCAGACT 1425  
 |||||  
 Sbjct 241 TCGTCAAAC 250

>SRR2298546.837218 837218 length=501  
 Length=501

Score = 435 bits (235), Expect = 2e-117  
 Identities = 247/253 (98%), Gaps = 0/253 (0%)  
 Strand=Plus/Minus

Query 1264 TGTATGAACCCAAACCTGTTGTGACATATGACTCAAAGTTAGAATTTGGAGCATTACCA 1323  
 |||||  
 Sbjct 501 TGTATGAACCCAAACCTGTTGTGACATATGACTCAAAGTTAGAATTTGGAGCGTTACCA 442

Query 1324 ATTTACCACATGTATTGATGAATTTGGCTGAGACCACACAGGCTGATTTATGTATCCCCT 1383  
 |||||  
 Sbjct 441 ATTTACCACATGTATTGATGAATTTGGCTGAGACCACACAGGCTGATTTATGTATCCCCT 382

Query 1384 ATGTTGCTGACACAAACTATGTTAAACCGGATTCGTCAGACTTAGGGCAACTAAAAGTCT 1443  
 |||||  
 Sbjct 381 ATGTTGCTGACACAAACTATGTTAAACAGATTCGTCAGACTTAGGGCAACTAAAAGTCT 322

Query 1444 ATGTTTGGACACCTTTATCTATACCTTCAGGTTCTGCGACACAAGTTGATGTAACCATAT 1503  
 |||||  
 Sbjct 321 ATGTTTGGACACCTTTATCCATACCTTCAGGTTCTGCTACACAAGTTGATGTTACCATAT 262

Query 1504 TGGGTAGTTTATT 1516  
 |||||  
 Sbjct 261 TGGGTAGTTTATT 249

Score = 403 bits (218), Expect = 4e-108

Identities = 240/251 (96%), Gaps = 0/251 (0%)  
Strand=Plus/Plus

```
Query 1096 GGGCTAGAGGACATCAGATAACCCATGTGGAATTGCCAAAAGTCTTTTGGGACAAAAACA 1155
          ||||| ||||| ||||| ||||| ||||| ||||| ||||| ||||| ||||| ||||| |||||
Sbjct 1 GGGCTGGAGGACATCAGATAACCCATGTGGAATACCAAAAAGTCTTTTGGGACAAAAACA 60

Query 1156 GTAAGCCAGCCTATGGCCAATCAAGATACTTTGCAGCAGTACGGTGTGGCTTTCATTTTC 1215
          | ||||| ||||| ||||| ||||| ||||| ||||| ||||| ||||| ||||| |||||
Sbjct 61 GCAAGCCAGCCTATGGCCAATCAAGATACTTTGCAGCAGTACGGTGTGGTTTTTCATTTTC 120

Query 1216 AGGTGCAAGTGAATGTTAACCAAGGAACAGCTGGTAGTGCATTGGTGGTGTATGAACCCA 1275
          | || ||||| ||||| ||||| ||||| ||||| ||||| ||||| ||||| |||||
Sbjct 121 AAGTACAAGTGAATGTTAATCAAGGAACAGCCGGTAGTGCATTGGTGGTGTATGAACCCA 180

Query 1276 AACCTGTTGTGACATATGACTCAAAGTTAGAATTTGGAGCATTTACCAATTTACCACATG 1335
          ||||| ||||| ||||| ||||| ||||| ||||| ||||| ||||| ||||| |||||
Sbjct 181 AACCTGTTGTGACATATGACTCAAAGTTAGAATTTGGAGCGTTTACCAATTTACCACATG 240

Query 1336 TATTGATGAAT 1346
          | |||||
Sbjct 241 TGTGATGAAT 251
```

>SRR2298546.758593 758593 length=500  
Length=500

Score = 435 bits (235), Expect = 2e-117  
Identities = 247/253 (98%), Gaps = 0/253 (0%)  
Strand=Plus/Minus

```
Query 1256 ATTGGTGGTGTATGAACCCAAACCTGTTGTGACATATGACTCAAAGTTAGAATTTGGAGC 1315
          ||||| ||||| ||||| ||||| ||||| ||||| ||||| ||||| ||||| |||||
Sbjct 253 ATTGGTGGTGTATGAACCCAAACCTGTTGTGACATATGACTCAAAGTTAGAATTTGGAGC 194

Query 1316 ATTTACCAATTTACCACATGTATTGATGAATTTGGCTGAGACCACACAGGCTGATTTATG 1375
          ||||| ||||| ||||| ||||| ||||| ||||| ||||| ||||| ||||| |||||
Sbjct 193 GTTTACCAATTTACCACATGTGTTGATGAATTTGGCTGAGACCACACAGGCTGATTTATG 134

Query 1376 TATCCCCTATGTTGCTGACACAAACTATGTTAAAACGGATTCGTCAGACTTAGGGCAACT 1435
          ||||| ||||| ||||| ||||| ||||| ||||| ||||| ||||| ||||| |||||
Sbjct 133 TATCCCCTATGTTGCTGACACAAACTATGTTAAAACAGATTCGTCAGACTTAGGGCAACT 74

Query 1436 AAAAGTCTATGTTTGGACACCTTTATCTATACCTTCAGGTTCTGCGACACAAGTTGATGT 1495
          ||||| ||||| ||||| ||||| ||||| ||||| ||||| ||||| ||||| |||||
Sbjct 73 AAAAGTCTATGTTTGGACACCTTTATCCATACCTTCAGGTTCTGCTACACAAGTTGATGT 14

Query 1496 AACCATATTGGGT 1508
          |||||
Sbjct 13 TACCATATTGGGT 1
```

Score = 422 bits (228), Expect = 1e-113  
Identities = 244/252 (97%), Gaps = 0/252 (0%)  
Strand=Plus/Plus

```
Query 1172 CCAATCAAGATACTTTGCAGCAGTACGGTGTGGCTTTCATTTTCAGGTGCAAGTGAATGT 1231
          ||||| ||||| ||||| ||||| ||||| ||||| ||||| ||||| ||||| |||||
Sbjct 249 CCAATCAAGATACTTTGCAGCAGTACGGTGTGGTTTTTCATTTTCAGGTGCAAGTGAATGT 308
```

```

Query 1232 TAACCAAGGAACAGCTGGTAGTGCATTGGTGGTGTATGAACCCAAACCTGTTGTGACATA 1291
      ||| ||||||||||| |||||||||||||||||||||||||||||||||||||||
Sbjct 309 TAATCAAGGAACAGCCGGTAGTGCATTGGTGGTGTATGAACCCAAACCTGTTGTGACATA 368

Query 1292 TGACTCAAAGTTAGAATTTGGAGCATTTACCAATTTACCACATGTATTGATGAATTTGGC 1351
      ||||||||||| ||||||||||| ||||||||||| ||||||||||| |||||||||||
Sbjct 369 TGACTCAAAGTTAGAATTTGGAGCGTTTACCAATTTACCACATGTGTTGATGAATTTGGC 428

Query 1352 TGAGACCACACAGGCTGATTTATGTATCCCCTATGTTGCTGACACAAACTATGTTAAAAC 1411
      ||||||||||| ||||||||||| ||||||||||| ||||||||||| |||||||||||
Sbjct 429 TGAGACCACACAGGCTGATTTATGTATCCCCTATGTTGCTGACACAAACTATGTTAAAAC 488

Query 1412 GGATTCGTCAGA 1423
      |||||||||||
Sbjct 489 AGATTCGTCAGA 500

```

```

>SRR2298546.171832 171832 length=502
Length=502

```

```

Score = 435 bits (235), Expect = 2e-117
Identities = 248/254 (98%), Gaps = 1/254 (0%)
Strand=Plus/Plus

```

```

Query 1248 GGTAGTGCATTGGTGGTGTATGAACCCAAACCTGTTGTGACATATGACTCAAAGTTAGAA 1307
      ||||||||||| ||||||||||| ||||||||||| ||||||||||| |||||||||||
Sbjct 2 GGTAGTGCATTGGTGGTGTATGAACCCAAACCTGTTGTGACATATGACTCAAAGTTAGAA 61

Query 1308 TTTGGAGCATTTACCAATTTACCACATGTATTGATGAATTTGGCTGAGACCACACAGGCT 1367
      ||||||| ||||||||||| ||||||||||| ||||||||||| |||||||||||
Sbjct 62 TTTGGAGCGTTTACCAATTTACCACATGTGTTGATGAATTTGGCTGAGACCACACAGGCT 121

Query 1368 GATTTATGTATCCCCTATGTTGCTGACACAAACTATGTTAAAACGGATTCGTCAGACTTA 1427
      ||||||||||| ||||||||||| ||||||||||| ||||||||||| |||||||||||
Sbjct 122 GATTTATGTATCCCCTATGTTGCTGACACAAACTATGTTAAAACAGATTCGTCAGACTTA 181

Query 1428 GGGCAACTAAAAGTCTATGTTTGGACACCTTTATCTATACCTTCAGGTTCTGCGACACAA 1487
      ||||||||||| ||||||||||| ||||||||||| ||||||||||| |||||||||||
Sbjct 182 GGGCAACTAAAAGTCTATGTTTGGACACCTTTATCCATACCTTCAGGTTCTGCTACACAA 241

Query 1488 GTTGATGT-AACCA 1500
      ||||||| |||||
Sbjct 242 GTTGATGTTAACCA 255

```

```

Score = 399 bits (216), Expect = 6e-107
Identities = 240/252 (95%), Gaps = 0/252 (0%)
Strand=Plus/Minus

```

```

Query 1476 TCTGCGACACAAGTTGATGTAACCATATTGGGTAGTTTATTGCAATTGGACTTCCAAAAT 1535
      ||||| ||||||||||| ||||||||||| ||||||||||| |||||||||||
Sbjct 502 TCTGCTACACAAGTTGATGTTACCATATTGGGTAGCTTATTGCAATTGGACTTCCAAAAT 443

Query 1536 CCTAGGGTGTFTTGGCCAAGACGTTGGTATCTATGATAATGCACCAACGCGGAAACAAAAT 1595
      ||||||| || || || ||||||||||| ||||| ||||||| ||||||| |||||||
Sbjct 442 CCTAGGGTATTCGGTCAAGACGTTGGTATTTATGACAATGCACAAACGCGGAAAGCAAAAAT 383

Query 1596 CTTAAAAAGATTCTTACAATGAGCACTAAATACAAGTGGACTAGGGGAAAAAATTGACATT 1655

```

```

Sbjct 382      ||||||| || ||||||||||||||||||||||||||||||||||||||| 323
CTTAAGAAAAATTCCTTACAATGAGCACTAAAATACAAGTGGACTAGGGGAAAAAATTGACATT

Query 1656     GCAGAAGGGCCAGGTTCTATGAACATGGCGAACGTATTGAGTACCACTGCAGCGCAATCA 1715
|||||||||||||||||||||||||||||||||||||||||

Sbjct 322      GCAGAAGGGCCAGGTTCTATGAACATGGCGAACGTATTGAGTACCACTGCAGCGCAATCA 263

Query 1716     ATTGCTTTGGTT 1727
|||||||||||||
Sbjct 262      ATTGCTTTGGTT 251

```

>SRR2298546.85661 85661 length=502  
Length=502

Score = 435 bits (235), Expect = 2e-117  
Identities = 247/253 (98%), Gaps = 0/253 (0%)  
Strand=Plus/Plus

```

Query 1259     GGTGGTGTATGAACCCAAACCTGTTGTGACATATGACTCAAAGTTAGAATTTGGAGCATT 1318
|||||||||||||||||||||||||||||||||||||||||

Sbjct 1        GGTGGTGTATGAACCCAAACCTGTTGTGACATATGACTCAAAGTTAGAATTTGGAGCGTT 60

Query 1319     TACCAATTTACCACATGTATTGATGAATTTGGCTGAGACCACACAGGCTGATTTATGTAT 1378
|||||||||||||||||||||||||||||||||||||||||

Sbjct 61       TACCAATTTACCACATGTATTGATGAATTTGGCTGAGACCACACAGGCTGATTTATGTAT 120

Query 1379     CCCCTATGTTGCTGACACAAACTATGTTAAAAACGGATTCGTCAGACTTAGGGCAACTAAA 1438
|||||||||||||||||||||||||||||||||||||||||

Sbjct 121      CCCCTATGTTGCTGACACAAACTATGTTAAAAACAGATTCGTCAGACTTAGGGCAACTAAA 180

Query 1439     AGTCTATGTTTGGACACCTTTATCTATACCTTCAGGTTCTGCGACACAAGTTGATGTAAC 1498
|||||||||||||||||||||||||||||||||||||||||

Sbjct 181      AGTCTATGTTTGGACACCTTTATCCATACCTTCAGGTTCTGCTACACAAGTTGATGTTAC 240

Query 1499     CATATTGGGTAGT 1511
|||||||||||||
Sbjct 241      CATATTGGGTAGT 253

```

Score = 407 bits (220), Expect = 3e-109  
Identities = 240/250 (96%), Gaps = 0/250 (0%)  
Strand=Plus/Minus

```

Query 1321     CCAATTTACCACATGTATTGATGAATTTGGCTGAGACCACACAGGCTGATTTATGTATCC 1380
|||||||||||||||||||||||||||||||||||||||||

Sbjct 502      CCAATTTACCACATGTATTGATGAATTTGGCTGAGACCACACAGGCTGATTTATGTATCC 443

Query 1381     CCTATGTTGCTGACACAAACTATGTTAAAAACGGATTCGTCAGACTTAGGGCAACTAAAAG 1440
|||||||||||||||||||||||||||||||||||||||||

Sbjct 442      CCTATGTTGCTGACACAAACTATGTTAAAAACAGATTCGTCAGACTTAGGGCAACTAAAAG 383

Query 1441     TCTATGTTTGGACACCTTTATCTATACCTTCAGGTTCTGCGACACAAGTTGATGTAACCA 1500
|||||||||||||||||||||||||||||||||||||||||

Sbjct 382      TCTATGTTTGGACACCTTTATCCATACCTTCAGGTTCTGCTACACAAGTTGATGTTACCA 323

Query 1501     TATTGGGTAGTTTATTGCAATTGGACTTCCAAAATCCTAGGGTGTGTTGGCCAAGACGTTG 1560
|||||||||||||||||||||||||||||||||||||||||

Sbjct 322      TATTGGGTAGCTTATTGCAATTGGACTTCCAAAATCCTAGGGTATTCGGTCAAGACGTTG 263

```



Query 1561 GTATCTATGA 1570  
|||||  
Sbjct 262 GTATTTATGA 253

>SRR2298382.81982 81982 length=502  
Length=502

Score = 435 bits (235), Expect = 2e-117  
Identities = 247/253 (98%), Gaps = 0/253 (0%)  
Strand=Plus/Minus

Query 373 AGCAACATTTTGTGCTGCAAAGCATCCTATTGCCAGCGGAACAACACCTGGTAACAGGTGCC 432  
|||||  
Sbjct 253 AGCAACATTTTGTGCTGTAAGCATCCTATTGCCAGCGGAACAACACCTGGTAACAGGTGCC 194

Query 433 TCTGGGGCCAAAAGCCAAGGTCTAACAAACCCTTTAGGATTGGTTCTAAACCTGAGATGT 492  
|||||  
Sbjct 193 TCTGGGGCCAAAAGCCAAGGTCTAACAAACCCTTTAGGATTGGTTCTAAACCTGAGATGT 134

Query 493 TGTGGAAGATACTTAGTACCTGCCGATCTGGTAGTACTGCAAACACTAGTTGTAAGGCC 552  
|||||  
Sbjct 133 TGTGGAAGATACTTAGTACCTACCGATCTGGTAGTACTGCAAACACTAGTTGTAAGGCC 74

Query 553 ACGAAGGATGCCCAGAAGGTACCCATAGGTAACAAGTGACACTATGGATCTGATCTGGGG 612  
|||||  
Sbjct 73 ACGAAGGAGGCCCAGAAGGTACCCATAGGTAACAAGCGACACTATGGATCTGATCTGGGG 14

Query 613 CCAGGTACCTCTA 625  
|||||  
Sbjct 13 CCAGGTACCTCTA 1

Score = 429 bits (232), Expect = 7e-116  
Identities = 244/250 (98%), Gaps = 0/250 (0%)  
Strand=Plus/Plus

Query 347 CTGGTGACGTGTGGGAACCTTATTGGAAGCAACATTTTGTGCTGCAAAGCATCCTATTGCCAG 406  
|||||  
Sbjct 252 CTGGTGACGTGTGGGAACCTTATTGGAACAACATTTTGTGCTGTAAGCATCCTATTGCCAG 311

Query 407 CGGAACAACACCTGGTAACAGGTGCCTCTGGGGCCAAAAGCCAAGGTCTAACAAACCCTT 466  
|||||  
Sbjct 312 CGGAACAACACCTGGTAACAGGTGCCTCTGGGGCCAAAAGCCAAGGTCTAACAAACCCTT 371

Query 467 TAGGATTGGTTCTAAACCTGAGATGTTGTGGAAGATACTTAGTACCTGCCGATCTGGTAG 526  
|||||  
Sbjct 372 TAGGATTGGTTCTAAACCTGAGATGTTGTGGAAGATACTTAGTACCTACCGATCTGGTAG 431

Query 527 TACTGCAAACACTAGTTGTAAGGCCACGAAGGATGCCCAGAAGGTACCCATAGGTAACA 586  
||  
Sbjct 432 TAGTGCAAACACTAGTTGTAAGGCCACGAAGGATGCCCAGAAGGTACCCATAGGTAACA 491

Query 587 AGTGACACTA 596  
||  
Sbjct 492 AGCGACACTA 501

>SRR2298573.824788 824788 length=500  
Length=500

Score = 433 bits (234), Expect = 5e-117  
Identities = 246/252 (98%), Gaps = 0/252 (0%)  
Strand=Plus/Plus

```
Query 436 GGGGCCAAAAGCCAAGGTCTAACAAACCCCTTTAGGATTGGTTCTAAACCTGAGATGTTGT 495
          |||
Sbjct 1 GGGGCCAAAAGCCAAGGTTTAACAAACCCCTTTAGGATTGGTTCTAAACCTGAGATGTTGT 60

Query 496 GGAAGATACTTAGTACCTGCCGATCTGGTAGTACTGCAAACACTAGTTGTAAGGCCACG 555
          |||
Sbjct 61 GGAAGATACTTAGTACCTACCGATCTGGTAGTACTGCAAACACTAGTTGTAAGGCCACG 120

Query 556 AAGGATGCCCAGAAGGTACCCATAGGTAACAAGTGACACTATGGATCTGATCTGGGGCCA 615
          |||
Sbjct 121 AAGGATGCCCAGAAGGTACCCATAGGTAACAAGCGACACTATGGATCTGATCTGGGGCCA 180

Query 616 GGTACCTCTATCTTGGTGACCTGGTTAAAAAGCGTCTAGTGGGCCAAAACCCgggggggAT 675
          |||
Sbjct 181 GGTACCTCTATCTTGGTGATCTGGTTAAAAAACGTCTAGTGGGCCAAAACCCGGGGGGGAT 240

Query 676 CCCCgGTTTCCT 687
          |||
Sbjct 241 CCCCgGTTTCCT 252
```

Score = 340 bits (184), Expect = 3e-89  
Identities = 234/258 (91%), Gaps = 4/258 (2%)  
Strand=Plus/Minus

```
Query 668 ggggggATCCCCgGTTTCCTTTTATTTTATCA--ATGCTACAATGGAGACAATTTAAAAGT 725
          |||
Sbjct 500 GGGGGGATCCCCgGTTTCCTTTT-TTTT-TCACCATGCCACTGTGGAGACAATTAAGGGT 443

Query 726 ATTGCAGATATGGCGACCGGAGTGGTCAGTTCAGTTGATTCCACTATCAATGCAGTTAAT 785
          |||
Sbjct 442 ATTGCAGTTTGGCCACCGGAGTGGTCAGTTCAGTTGATTCCACTATCAATGTAGTTAAT 383

Query 786 GAGAGAGTAGAAAATGTGGGCAATGAAATTGGAGGTAACCTATTAACCAAAGTAGCAGAT 845
          |||
Sbjct 382 GAGAGAGTGAAAATTTAGGTAATGAAATTGGAGGTAATTTATTAACCAAAGTTGCAGAT 323

Query 846 GATGCTTCTAATGTGCTTGGACCAAATTGTTATGCTACAACAGCTGAACCAGAGAACAAA 905
          |||
Sbjct 322 GATGCTTCTAATGTGCTCGGACCAAATTGCTATGCTACAACAGCTGAACCAGAGAACAAA 263

Query 906 GATGTGGTACAGGCAACC 923
          |||
Sbjct 262 GATGTAGTACAGGAAACC 245
```

>SRR2298573.800813 800813 length=500  
Length=500

Score = 433 bits (234), Expect = 5e-117  
Identities = 244/249 (98%), Gaps = 0/249 (0%)  
Strand=Plus/Plus

```
Query 327 CTAGTAAGTTTGTGAGACGTCTGGTGACGTGTGGGAACTTATTGGAAACAACATTTTGCT 386
|
Sbjct 1 CTAGTAAGTTTGTGAGACGTCTGGTGACGTGTGGGAACTTATTGGAAACAACATTTTGCT 60

Query 387 GCAAAGCATCCTATTGCCAGCGGAACAACACCTGGTAACAGGTGCCTCTGGGGCCAAAAG 446
|
Sbjct 61 GTAAAGCATCCTATTGCCAGCGGAACAACACCTGGTAACAGGTGCCTCTGGGGCCAAAAG 120

Query 447 CCAAGGTCTAACAAAACCCTTTAGGATTGGTTCTAAACCTGAGATGTTGTGGAAGATACTT 506
|
Sbjct 121 CCAAGGTCTAACAAAACCCTTTAGGATTGGTTCTAAACCTGAGATGTTGTGGAAGATACTT 180

Query 507 AGTACCTGCCGATCTGGTAGTACTGCAAACTAGTTGTAAGGCCACGAAGGATGCCCA 566
|
Sbjct 181 AGTACCTGCCGATCTGGTAGTACTGCAAACTAGTTGTAAGGCCACGAAGGATGCCCA 240

Query 567 GAAGGTACC 575
|
Sbjct 241 GAAGGTACC 249
```

Score = 424 bits (229), Expect = 3e-114  
Identities = 243/250 (97%), Gaps = 0/250 (0%)  
Strand=Plus/Minus

```
Query 352 GACGTGTGGGAACTTATTGGAAACAACATTTTGCTGCAAAGCATCCTATTGCCAGCGGAA 411
|
Sbjct 500 GACGTGTGGGAACTTATTGGAAAACAACATTTTGCTGTAAAGCATCCTATTGCCAGCGGAA 441

Query 412 CAACACCTGGTAACAGGTGCCTCTGGGGCCAAAAGCCAAGGTCTAACAAAACCCTTTAGGA 471
|
Sbjct 440 CAACCCCTGGTAACAGGTGCCTCTGGGGCCAAAAGCCAAGGTTAACAAAACCCTTTAGGA 381

Query 472 TTGGTTCTAAACCTGAGATGTTGTGGAAGATACTTAGTACCTGCCGATCTGGTAGTACTG 531
|
Sbjct 380 TTGGTTCTAAACCTGAGATGTTGTGGAAGATACTTAGTACCTACCGATCTGGTAGTAGTG 321

Query 532 CAAACACTAGTTGTAAGGCCACGAAGGATGCCCAGAAGGTACCCATAGGTAACAAGTGA 591
|
Sbjct 320 CAAACACTAGTTGTAAGGCCACGAAGGATGCCCAGAAGGTACCCATAGGTAACAAGCGA 261

Query 592 CACTATGGAT 601
|
Sbjct 260 CACTATGGAT 251
```

>SRR2298573.779215 779215 length=500  
Length=500

Score = 433 bits (234), Expect = 5e-117  
Identities = 244/249 (98%), Gaps = 0/249 (0%)  
Strand=Plus/Minus

```
Query 455 TAACAAAACCCTTTAGGATTGGTTCTAAACCTGAGATGTTGTGGAAGATACTTAGTACCTG 514
|
Sbjct 250 TAACAAAACCCTTTAGGATTGGTTCTAAACCTGAGATGTTGTGGAAGATACTTAGTACCTA 191

Query 515 CCGATCTGGTAGTACTGCAAACTAGTTGTAAGGCCACGAAGGATGCCCAGAAGGTAC 574
```

```

Sbjct 190 |||
CCGATCTGGTAGTAGTGCAAACACTAGTTGTAAGGCCACGAAGGATGCCCAGAAGGTAC 131
Query 575 CCATAGGTAACAAGTGACACTATGGATCTGATCTGGGGCCAGGTACCTCTATCTTGGTGA 634
|||
Sbjct 130 CCATAGGTAACAAGCGACACTATGGATCTGATCTGGGGCCAGGTACCTCTATCTTGGTGA 71
Query 635 CCTGGTTAAAAAGCGTCTAGTGGGCCAAAACCCgggggggATCCCCGGTTTCCTTTTATTT 694
|||
Sbjct 70 TCTGGTTAAAAAACGTCTAGTGGGCCAAAACCCGGGGGGGATCCCCGGTTTCCTTTTATTT 11
Query 695 TATCAATGC 703
|||
Sbjct 10 TATCAATGC 2

```

Score = 412 bits (223), Expect = 7e-111  
Identities = 241/250 (96%), Gaps = 0/250 (0%)  
Strand=Plus/Plus

```

Query 356 TGTGGGAACCTTATTGGAAGCAACATTTTGCTGCAAAGCATCCTATTGCCAGCGGAACAAC 415
|||
Sbjct 251 TGTGGGCACTTATTGGAACAACATTTTGCTGTAAAGCATCCTATTGCCAGCGGAACAAC 310
Query 416 ACCTGGTAACAGGTGCCTCTGGGGCCAAAAGCCAAGGTCTAACAAACCTTTAGGATTGG 475
|||
Sbjct 311 ACCTGGTAACAGGTGCCTCTGGGGCCAAAAGCCAAGGTTTACCAAACCTTTAGGATTGG 370
Query 476 TTCTAAACCTGAGATGTTGTGGAAGATACTTAGTACCTGCCGATCTGGTAGTACTGCAAA 535
|||
Sbjct 371 TTCTAAACCTGAGATGTTGTGGAAGATACTTAGTACCTACCGATCTGGTAGTAGTGC AAA 430
Query 536 CACTAGTTGTAAGGCCACGAAGGATGCCCAGAAGGTACCCATAGGTAACAAGTGACACT 595
|||
Sbjct 431 CACTAGTTGTAAGGCCACGAAGGATGCCCAGAAGGTACCCATAGGGAACAAGGGACACT 490
Query 596 ATGGATCTGA 605
|||
Sbjct 491 ATGGATCTGA 500

```

>SRR2298573.758263 758263 length=500  
Length=500

Score = 433 bits (234), Expect = 5e-117  
Identities = 244/249 (98%), Gaps = 0/249 (0%)  
Strand=Plus/Minus

```

Query 455 TAACAAACCTTTAGGATTGGTTCTAAACCTGAGATGTTGTGGAAGATACTTAGTACCTG 514
|||
Sbjct 249 TAACAAACCTTTAGGATTGGTTCTAAACCTGAGATGTTGTGGAAGATACTTAGTACCTA 190
Query 515 CCGATCTGGTAGTACTGCAAACACTAGTTGTAAGGCCACGAAGGATGCCCAGAAGGTAC 574
|||
Sbjct 189 CCGATCTGGTAGTAGTGCAAACACTAGTTGTAAGGCCACGAAGGATGCCCAGAAGGTAC 130
Query 575 CCATAGGTAACAAGTGACACTATGGATCTGATCTGGGGCCAGGTACCTCTATCTTGGTGA 634
|||
Sbjct 129 CCATAGGTAACAAGCGACACTATGGATCTGATCTGGGGCCAGGTACCTCTATCTTGGTGA 70

```

```

Query  635  CCTGGTTAAAAAGCGTCTAGTGGGCCAAAACCCgggggggATCCCCGGTTTCCTTTTATTT 694
      |||
Sbjct  69    TCTGGTTAAAAACGTCTAGTGGGCCAAAACCCGGGGGGGATCCCCGGTTTCCTTTTATTT 10

Query  695  TATCAATGC  703
      |||
Sbjct  9     TATCAATGC  1

```

Score = 414 bits (224), Expect = 2e-111  
 Identities = 242/251 (96%), Gaps = 0/251 (0%)  
 Strand=Plus/Plus

```

Query  449  AAGGTCTAACAAACCCTTTAGGATTGGTTCATAACCTGAGATGTTGTGGAAGATACTTAG 508
      |||
Sbjct  250  AAGGTTTAAACAAACCCTTTAGGATTGGTTCATAACCTGAGATGTTGTGGAAGATACTTAG 309

Query  509  TACCTGCCGATCTGGTAGTACTGCAAACTAGTTGTAAGGCCACGAAGGATGCCCAGA 568
      |||
Sbjct  310  TACCTACCGATCTGGTAGTAGTGCAAACTAGTTGTAAGGCCACGAAGGATGCCCAGA 369

Query  569  AGGTACCCATAGGTAACAAGTGACACTATGGATCTGATCTGGGGCCAGGTACCTCTATCT 628
      |||
Sbjct  370  AGGTACCCATAGGTAACAAGCGACACTATGGATCTGATCTGGGGCCAGGTACCTCTATCT 429

Query  629  TGGTGACCTGGTTAAAAAGCGTCTAGTGGGCCAAAACCCgggggggATCCCCGGTTTCCTT 688
      |||
Sbjct  430  TGGTGATCTGGTTAAAAAACGTCTAGGGGGCCAAAACCCGGGGGGGATCCCCGGTTTCCTT 489

Query  689  TTATTTTATCA  699
      |||
Sbjct  490  TTATTTTATCA  500

```

>SRR2298573.736368 736368 length=500  
 Length=500

Score = 433 bits (234), Expect = 5e-117  
 Identities = 244/249 (98%), Gaps = 0/249 (0%)  
 Strand=Plus/Minus

```

Query  330  GTAAGTTTGTGAGACGTCTGGTGACGTGTGGGAACTTATTGGAAGCAACATTTTGCTGCA 389
      |||
Sbjct  249  GTAAGTTTGTGAGACGTCTGGTGACGTGTGGGAACTTATTGGAAGCAACATTTTGCTGTA 190

Query  390  AAGCATCCTATTGCCAGCGGAACAACACCTGGTAACAGGTGCCTCTGGGGCCAAAAGCCA 449
      |||
Sbjct  189  AAGCATCCTATTGCCAGCGGAACAACACCTGGTAACAGGTGCCTCTGGGGCCAAAAGCCA 130

Query  450  AGGTCTAACAAACCCTTTAGGATTGGTTCATAACCTGAGATGTTGTGGAAGATACTTAGT 509
      |||
Sbjct  129  AGGTTTAAACAAACCCTTTAGGATTGGTTCATAACCTGAGATGTTGTGGAAGATACTTAGT 70

Query  510  ACCTGCCGATCTGGTAGTACTGCAAACTAGTTGTAAGGCCACGAAGGATGCCCAGAA 569
      |||
Sbjct  69    ACCTACCGATCTGGTAGTAGTGCAAACTAGTTGTAAGGCCACGAAGGATGCCCAGAA 10

Query  570  GGTACCCAT  578

```

Sbjct 9 |||||  
GGTACCCAT 1

Score = 405 bits (219), Expect = 1e-108  
Identities = 239/249 (96%), Gaps = 0/249 (0%)  
Strand=Plus/Plus

Query 251 GGGGTGGCAGATGGCGTGCCATAATTCTACTAGTGAGATAACCACGCTTGTGGACCTTATG 310  
|||||  
Sbjct 251 GGGGTGGTAGATGGCGTGCCATAGCTCTATTAGTGAGATAACCATGCTTGTGGACCTTATG 310  
  
Query 311 CTCACACAGCCATCCTCTAGTAAGTTTGTGAGACGTCTGGTGACGTGTGGGAACTTATTG 370  
|||||  
Sbjct 311 CTCACACAGCCATCCTCTAGTAAGTTTGTGAGACGTCTGGTGACGTGTGGGAACTTATTG 370  
  
Query 371 GAAGCAACATTTTGCTGCAAAGCATCCTATTGCCAGCGGAACAACACCTGGTAACAGGTG 430  
|||  
Sbjct 371 GAAACAACATTTTGCTGTAAAGCATCCTATTGCCAGCGGAACAACACCTGGTAACAGGTG 430  
  
Query 431 CCTCTGGGGCCAAAAGCCAAGGTCTAACAAACCCTTTAGGATTGGTTCTAAACCTGAGAT 490  
|||||  
Sbjct 431 CCTCTGGGGCCAAAAGCCCAGGTTTAAACAAACCCTTTAGGATTGGTTCTAAACCTGAGAT 490  
  
Query 491 GTTGTGGAA 499  
||||  
Sbjct 491 GTTGGGGAA 499

>SRR2298573.593802 593802 length=500  
Length=500

Score = 433 bits (234), Expect = 5e-117  
Identities = 246/252 (98%), Gaps = 0/252 (0%)  
Strand=Plus/Plus

Query 277 C TACTAGTGAGATAACCACGCTTGTGGACCTTATGCTCACACAGCCATCCTCTAGTAAGTT 336  
|||  
Sbjct 249 CTATTAGTGAGATAACCATGCTTGTGGACCTTATGCTCACACAGCCATCCTCTAGTAAGTT 308  
  
Query 337 TGTGAGACGTCTGGTGACGTGTGGGAACTTATTGGAAGCAACATTTTGCTGCAAAGCATC 396  
|||||  
Sbjct 309 TGTGAGACGTCTGGTGACGTGTGGGAACTTATTGGAACAACATTTTGCTGTAAAGCATC 368  
  
Query 397 CTATTGCCAGCGGAACAACACCTGGTAACAGGTGCCTCTGGGGCCAAAAGCCAAGGTCTA 456  
|||||  
Sbjct 369 CTATTGCCAGCGGAACAACACCTGGTAACAGGTGCCTCTGGGGCCAAAAGCCAAGGTTTA 428  
  
Query 457 ACAAACCCTTTAGGATTGGTTCTAAACCTGAGATGTTGTGGAAGATACTTAGTACCTGCC 516  
|||||  
Sbjct 429 ACAAACCCTTTAGGATTGGTTCTAAACCTGAGATGTTGTGGAAGATACTTAGTACCTACC 488  
  
Query 517 GATCTGGTAGTA 528  
|||||  
Sbjct 489 GATCTGGTAGTA 500

Score = 418 bits (226), Expect = 2e-112  
Identities = 242/250 (97%), Gaps = 0/250 (0%)

Strand=Plus/Minus

```

Query 333 AGTTTGTGAGACGTCTGGTGACGTGTGGGAACTTATTGGAAGCAACATTTTGCTGCAAAG 392
      ||||| ||||| ||||| ||||| ||||| ||||| ||||| ||||| ||||| ||||| |||||
Sbjct 250 AGTTTGGGAGACGTCTGGTGACGTGTGGGAACTTATTGGAACAACATTTTGCTGTAAAG 191

Query 393 CATCCTATTGCCAGCGGAACAACACCTGGTAACAGGTGCCTCTGGGGCCAAAAGCCAAGG 452
      ||||| ||||| ||||| ||||| ||||| ||||| ||||| ||||| ||||| ||||| |||||
Sbjct 190 CATCCTATTGCCAGCGGAACAACACCTGGTAACAGGTGCCTCTGGGGCCAAAAGCCAAGG 131

Query 453 TCTAACAAAACCCCTTTAGGATTGGTTCTAAACCTGAGATGTTGTGGAAGATACTTAGTACC 512
      | ||||| ||||| ||||| ||||| ||||| ||||| ||||| ||||| ||||| ||||| |||||
Sbjct 130 TTTAACAAAACCCCTTTAGGATTGGTTCTAAACCTGAGATGTTGTGGAAGATACTTAGTACC 71

Query 513 TGCCGATCTGGTAGTACTGCAAACACTAGTTGTAAGGCCACGAAGGATGCCCAGAAGGT 572
      | ||||| ||||| ||||| ||||| ||||| ||||| ||||| ||||| ||||| ||||| |||||
Sbjct 70 TACCGATCTGGTAGTAGTGCAAACACTAGTTGTAAGGCCACGAAGGATGCCCAGGAGGT 11

Query 573 ACCCATAGGT 582
      |||||
Sbjct 10 ACCCATAGGT 1

```

>SRR2298573.582811 582811 length=500  
Length=500

Score = 433 bits (234), Expect = 5e-117  
Identities = 246/252 (98%), Gaps = 0/252 (0%)  
Strand=Plus/Plus

```

Query 449 AAGGTCTAACAAAACCCCTTTAGGATTGGTTCTAAACCTGAGATGTTGTGGAAGATACTTAG 508
      ||||| ||||| ||||| ||||| ||||| ||||| ||||| ||||| ||||| ||||| |||||
Sbjct 249 AAGGTCTAACAAAACCCCTTTAGGATTGGTTCTAAACCTGAGATGTTGTGGAAGATACTTAG 308

Query 509 TACCTGCCGATCTGGTAGTACTGCAAACACTAGTTGTAAGGCCACGAAGGATGCCCAGA 568
      ||||| ||||| ||||| ||||| ||||| ||||| ||||| ||||| ||||| ||||| |||||
Sbjct 309 TACCTACCGATCTGGTAGTAGTGCAAACACTAGTTGTAAGGCCACGAAGGATGCCCAGA 368

Query 569 AGGTACCCATAGGTAACAAGTGACACTATGGATCTGATCTGGGGCCAGGTACCTCTATCT 628
      ||||| ||||| ||||| ||||| ||||| ||||| ||||| ||||| ||||| ||||| |||||
Sbjct 369 AGGTACCCATAGGTAACAAGCGACACTATGGATCTGATCTGGGGCCAGGTACCTCTATCT 428

Query 629 TGGTGACCTGGTTAAAAAGCGTCTAGTGGGCCAAAACCCgggggggATCCCCGGTTTCCTT 688
      ||| | ||||| ||||| ||||| ||||| ||||| ||||| ||||| ||||| ||||| |||||
Sbjct 429 TGGGGATCTGGTTAAAAAACGCTCTAGTGGGCCAAAACCCGGGGGGGATCCCCGGTTTCCTT 488

Query 689 TTATTTTATCAA 700
      |||||
Sbjct 489 TTATTTTATCAA 500

```

Score = 399 bits (216), Expect = 6e-107  
Identities = 238/249 (96%), Gaps = 0/249 (0%)  
Strand=Plus/Minus

```

Query 476 TTCTAAACCTGAGATGTTGTGGAAGATACTTAGTACCTGCCGATCTGGTAGTACTGCAAA 535
      ||||| ||||| ||||| ||||| ||||| ||||| ||||| ||||| ||||| ||||| |||||
Sbjct 249 TTCTAAACCTGGGATGTTGTGGAAGATCCTTAGTTCTACCGATCTGGTAGTAGTGCAAA 190

```

```

Query 536 CACTAGTTGTAAGGCCACGAAGGATGCCAGAAAGGTACCCATAGGTAACAAGTGACACT 595
          |||
Sbjct 189 CACTAGTTGTAAGGCCACGAAGGATGCCAGAAAGGTACCCATAGGTAACAAGCGACACT 130

Query 596 ATGGATCTGATCTGGGGCCAGGTACCTCTATCTTGGTGACCTGGTTAAAAAGCGTCTAGT 655
          |||
Sbjct 129 ATGGATCTGATCTGGGGCCAGGTACCTCTATCTTGGTGATCTGGTTAAAAAACGTCTAGT 70

Query 656 GGGCCAAACCCggggggggATCCCCGGTTTCCTTTTATTTTATCAATGCTACAATGGAGAC 715
          |||
Sbjct 69 GGGCCAAACCCGGGGGGGATCCCCGGTTTCCTTTTATTTTATCAATGCCACTATGGAGAC 10

Query 716 AATTAAAAG 724
          |||
Sbjct 9 AATTAAGAG 1

```

>SRR2298573.563998 563998 length=500  
Length=500

Score = 433 bits (234), Expect = 5e-117  
Identities = 244/249 (98%), Gaps = 0/249 (0%)  
Strand=Plus/Minus

```

Query 385 CTGCAAAGCATCCTATTGCCAGCGGAACAACACCTGGTAACAGGTGCCTCTGGGGCCAAA 444
          |||
Sbjct 249 CTGTAAAGCATCCTATTGCCAGCGGAACAACACCTGGTAACAGGTGCCTCTGGGGCCAAA 190

Query 445 AGCCAAGGTCTAACAAAACCTTTAGGATTGGTTCTAAACCTGAGATGTTGTGGAAGATAC 504
          |||
Sbjct 189 AGCCAAGGTTTAAACAACCTTTAGGATTGGTTCTAAACCTGAGATGTTGTGGAAGATAC 130

Query 505 TTAGTACCTGCCGATCTGGTAGTACTGCAAACACTAGTTGTAAGGCCACGAAGGATGCC 564
          |||
Sbjct 129 TTAGTACCTACCGATCTGGTAGTAGTGCAAACACTAGTTGTAAGGCCACGAAGGATGCC 70

Query 565 CAGAAAGGTACCCATAGGTAACAAGTGACACTATGGATCTGATCTGGGGCCAGGTACCTCT 624
          |||
Sbjct 69 CAGAAAGGTACCCATAGGTAACAAGCGGACACTATGGATCTGATCTGGGGCCAGGTACCTCT 10

Query 625 ATCTTGGTG 633
          |||
Sbjct 9 ATCTTGGTG 1

```

Score = 396 bits (214), Expect = 7e-106  
Identities = 238/250 (95%), Gaps = 0/250 (0%)  
Strand=Plus/Plus

```

Query 349 GGTGACGTGTGGGAACCTTATTGGAAGCAACATTTTGCTGCAAAGCATCCTATTGCCAGCG 408
          |||
Sbjct 251 GGTGACGTGTGGGAACCTTATTGGAACAACATTTTGCTGTAAAGCATCCTATTGCCAGCG 310

Query 409 GAACAACACCTGGTAACAGGTGCCTCTGGGGCCAAAAGCCAAGGTCTAACAAAACCTTTA 468
          |||
Sbjct 311 GAACAACACCTGGTAACAGGTGCCTCTGGGGCCAAAAGCCAAGGTTTAAACAACCTTTA 370

Query 469 GGATTGGTTCTAAACCTGAGATGTTGTGGAAGATACTTAGTACCTGCCGATCTGGTAGTA 528
          |||

```



```

Sbjct 371 GGATTGGTTCTAAACCTGAGATGTTGTGGAAGATACTTAGAACCTACCGATCTGGTAGTA 430
Query 529 CTGCAAACACTAGTTGTAAGGCCACGAAGGATGCCCAGAAGGTACCCATAGGTAACAAG 588
      |||
Sbjct 431 GTGCAAACACTAGTTGTAAGGCCACGAAGGATGCCCAGAAGGAACCCCTAGGTACAAAA 490
Query 589 TGACACTATG 598
      |||
Sbjct 491 CGACACTATG 500

```

>SRR2298573.544508 544508 length=500  
Length=500

Score = 433 bits (234), Expect = 5e-117  
Identities = 244/249 (98%), Gaps = 0/249 (0%)  
Strand=Plus/Minus

```

Query 298 TGTGGACCTTATGCTCACACAGCCATCCTCTAGTAAGTTTGTGAGACGTCTGGTGACGTG 357
      |||
Sbjct 249 TGTGGACCTTATGCTCACACAGCCATCCTCTAGTAAGTTTGTGAGACGTCTGGTGACGTG 190
Query 358 TGGGAACCTATTGGAAGCAACATTTTGCTGCAAAGCATCCTATTGCCAGCGGAACAACAC 417
      |||
Sbjct 189 TGGGAACCTATTGGAACAACATTTTGCTGTAAAGCATCCTATTGCCAGCGGAACAACAC 130
Query 418 CTGGTAACAGGTGCCCTCTGGGGCCAAAAGCCAAGGTCTAACAAAACCCTTTAGGATTGGTT 477
      |||
Sbjct 129 CTGGTAACAGGTGCCCTCTGGGGCCAAAAGCCAAGGTTTAACAAAACCCTTTAGGATTGGTT 70
Query 478 CTAAACCTGAGATGTTGTGGAAGATACTTAGTACCTGCCGATCTGGTAGTACTGCAAACA 537
      |||
Sbjct 69 CTAAACCTGAGATGTTGTGGAAGATACTTAGTACCTACCGATCTGGTAGTACTGCAAACA 10
Query 538 CTAGTTGTA 546
      |||
Sbjct 9 CTAGTTGTA 1

```

Score = 412 bits (223), Expect = 7e-111  
Identities = 239/247 (97%), Gaps = 0/247 (0%)  
Strand=Plus/Plus

```

Query 277 CTA TAGTGAGATAACCACGCTTGTGGACCTTATGCTCACACAGCCATCCTCTAGTAAGTT 336
      |||
Sbjct 251 CTATTAGTGAGATAACCATGCTTGTGGACCTTATGCTCACACAGCCATCCTCTAGTAAGTT 310
Query 337 TGTGAGACGTCTGGTGACGTGTGGGAACTTATTGGAAGCAACATTTTGCTGCAAAGCATC 396
      |||
Sbjct 311 TGTGAGACGTCTGGTGACGTGTGGGAACTTATTGGAACAACATTTTGCTGTAAAGCATC 370
Query 397 CTATTGCCAGCGGAACAACACCTGGTAACAGGTGCCCTCTGGGGCCAAAAGCCAAGGTCTA 456
      |||
Sbjct 371 CTATTGCCAGCGGAACAACACCTGGTAACAGGTGCCCTCTGGGGCCAAAAGCCAAGGTTTA 430
Query 457 ACAAACCCTTTAGGATTGGTTCTAAACCTGAGATGTTGTGGAAGATACTTAGTACCTGCC 516
      |||
Sbjct 431 ACAAACCCTTTAGGATTGGTTCTAAACCTGAGATGTTGTGGAAGATACTTAGTACCTACC 490

```



Length=500

Score = 433 bits (234), Expect = 5e-117  
Identities = 244/249 (98%), Gaps = 0/249 (0%)  
Strand=Plus/Minus

```
Query 323 TCCTCTAGTAAGTTTGTGAGACGTCTGGTGACGTGTGGGAACTTATTGGAAGCAACATTT 382
|||||
Sbjct 249 TCCTCTAGTAAGTTTGTGAGACGTCTGGTGACGTGTGGGAACTTATTGGAACAACATTT 190

Query 383 TGCTGCAAAGCATCCTATTGCCAGCGGAACAACACCTGGTAACAGGTGCCTCTGGGGCCA 442
|||||
Sbjct 189 TGCTGTAAAGCATCCTATTGCCAGCGGAACAACACCTGGTAACAGGTGCCTCTGGGGCCA 130

Query 443 AAAGCCAAGGTCTAACAAACCCTTTAGGATTGGTTCTAAACCTGAGATGTTGTGGAAGAT 502
|||||
Sbjct 129 AAAGCCAAGGTTTAAACAAACCCTTTAGGATTGGTTCTAAACCTGAGATGTTGTGGAAGAT 70

Query 503 ACTTAGTACCTGCCGATCTGGTAGTACTGCAAACACTAGTTGTAAGGCCACGAAGGATG 562
|||||
Sbjct 69 ACTTAGTACCTACCGATCTGGTAGTAGTGCAAACACTAGTTGTAAGGCCACGAAGGATG 10

Query 563 CCCAGAAGG 571
|||||
Sbjct 9 CCCAGAAGG 1
```

Score = 387 bits (209), Expect = 4e-103  
Identities = 235/248 (95%), Gaps = 0/248 (0%)  
Strand=Plus/Plus

```
Query 295 GCTTGTGGACCTTATGCTCACACAGCCATCCTCTAGTAAGTTTGTGAGACGTCTGGTGAC 354
|||||
Sbjct 250 GCTTGTGGACCTTATGCTCACACAGCCATCCTCTAGTAAGTTTGTGAGACGTCTGGTGAC 309

Query 355 GTGTGGGAACTTATTGGAAGCAACATTTTGTCTGCAAAGCATCCTATTGCCAGCGGAACAA 414
|||||
Sbjct 310 GTGTGGGAACTTATTGGAACAACATTTTGTCTGTAAAGCATCCTATTGCCAGCGGAACAA 369

Query 415 CACCTGGTAACAGGTGCCTCTGGGGCCAAAAGCCAAGGTCTAACAAACCCTTTAGGATTG 474
|||||
Sbjct 370 CACCTGGTAACAGGTGCCTCTGGGGCCAAAAGCCAAGGTTTAAACAAACCCTTTAGGATTG 429

Query 475 GTTCTAAACCTGAGATGTTGTGGAAGATACTTAGTACCTGCCGATCTGGTAGTACTGCAA 534
|||||
Sbjct 430 GTTCTACACCTGAGCTGTTGTGGAAGAAACTTAGTAACAACCGATCTGGCAGTAGGGCAA 489

Query 535 ACACTAGT 542
| |||||
Sbjct 490 AAACACTAGT 497
```

>SRR2298573.462636 462636 length=500  
Length=500

Score = 433 bits (234), Expect = 5e-117  
Identities = 242/246 (98%), Gaps = 0/246 (0%)  
Strand=Plus/Minus

```

Query 389 AAAGCATCCTATTGCCAGCGGAACAACACCTGGTAACAGGTGCCTCTGGGGCCAAAAGCC 448
          |||
Sbjct 248 AAAGCATCCTATTGCCAGCGGAACAACACCTGGTAACAGGTGCCTCTGGGGCCAAAAGCC 189

Query 449 AAGGTCTAACAAACCCTTTAGGATTGGTTCTAAACCTGAGATGTTGTGGAAGATACTTAG 508
          |||
Sbjct 188 AAGGTTTAAACAAACCCTTTAGGATTGGTTCTAAACCTGAGATGTTGTGGAAGATACTTAG 129

Query 509 TACCTGCCGATCTGGTAGTACTGCAAAACTAGTTGTAAGGCCACGAAGGATGCCCAGA 568
          |||
Sbjct 128 TACCTACCGATCTGGTAGTACTGCAAAACTAGTTGTAAGGCCACGAAGGATGCCCAGA 69

Query 569 AGGTACCCATAGGTAACAAGTGACACTATGGATCTGATCTGGGGCCAGGTACCTCTATCT 628
          |||
Sbjct 68 AGGTACCCATAGGTAACAAGCGACACTATGGATCTGATCTGGGGCCAGGTACCTCTATCT 9

Query 629 TGGTGA 634
          |||
Sbjct 8 TGGTGA 3

```

Score = 394 bits (213), Expect = 3e-105  
Identities = 237/249 (95%), Gaps = 0/249 (0%)  
Strand=Plus/Plus

```

Query 336 TTGTGAGACGTCTGGTGACGTGTGGGAACCTTATTGGAAGCAACATTTTGCTGCAAAGCAT 395
          |||
Sbjct 252 TTGAGAGACGTCTGGTGACGTGTGGGAACCTTATTGGAACAACATTTTGCTGTAAAGCAT 311

Query 396 CCTATTGCCAGCGGAACAACACCTGGTAACAGGTGCCTCTGGGGCCAAAAGCCAAGGTCT 455
          |||
Sbjct 312 CCTATTGCCAGCGGAACAACACCTGGTAACAGGTGCCTCTGGGGCCAAAAGCCAAGGTTT 371

Query 456 AACAAACCCTTTAGGATTGGTTCTAAACCTGAGATGTTGTGGAAGATACTTAGTACCTGC 515
          |||
Sbjct 372 AACAAACCCTTTAGGATTGGTTCTAAACCTGAGATGTTGTGGAAGATACTTAGTACCTAC 431

Query 516 CGATCTGGTAGTACTGCAAAACTAGTTGTAAGGCCACGAAGGATGCCCAGAAGGTACC 575
          |||
Sbjct 432 CGATCTGGTAGTACTGCAAAACTAGTTGTAAGGGCCACAAAGGAGTCCCAGAAGGGACC 491

Query 576 CATAGGTAA 584
          ||
Sbjct 492 CAAAGGTAA 500

```

>SRR2298573.451956 451956 length=500  
Length=500

Score = 433 bits (234), Expect = 5e-117  
Identities = 244/249 (98%), Gaps = 0/249 (0%)  
Strand=Plus/Plus

```

Query 296 CTTGTGGACCTTATGCTCACACAGCCATCCTCTAGTAAGTTTGTGAGACGTCTGGTGACC 355
          |||
Sbjct 1 CTTGTGGACCTTATGCTCACACAGCCATCCTCTAGTAAGTTTGTGAGACGTCTGGTGACC 60

Query 356 TGTGGGAACCTTATTGGAAGCAACATTTTGCTGCAAAGCATCCTATTGCCAGCGGAACAAC 415
          |||

```



Query 624 TATCTTGGTGACCTGGTTAAAAAGCGTCTAGTGGGCCAAAACCCgggggggATCCCCGGTT 683  
 |||  
 Sbjct 320 TATCTTGGTGATCTGGTTAAAAAACGTCTAGTGGGCCAAAACCCGGGGGGGATCCCCGGTT 261

Query 684 TCCTTTTATTTT 695  
 |||  
 Sbjct 260 TCCTTTTATTTT 249

Score = 424 bits (229), Expect = 3e-114  
 Identities = 243/250 (97%), Gaps = 0/250 (0%)  
 Strand=Plus/Plus

Query 414 ACACCTGGTAACAGGTGCCTCTGGGGCCAAAAGCCAAGGTCTAACAAACCCTTTAGGATT 473  
 |||  
 Sbjct 1 ACACCTGGTAACAGGTGCCTCTGGGGCCAAAAGCCAAGGTTAACAAACCCTTTAGGATT 60

Query 474 GGTTCCTAAACCTGAGATGTTGTGGAAGATACTTAGTACCTGCCGATCTGGTAGTACTGCA 533  
 |||  
 Sbjct 61 GGTTCCTAAACCTGAGATGTTGTGGAAGATACTTAGTACCTACCGATCTGGTAGTACTGCA 120

Query 534 AACACTAGTTGTAAGGCCACGAAGGATGCCCAGAAGGTACCCATAGGTAACAAGTGACA 593  
 |||  
 Sbjct 121 AACACTAGTTGTAAGGCCACGAAGGATGCCCAGAAGGTACCCATAGGTAACAAGCGACA 180

Query 594 CTATGGATCTGATCTGGGGCCAGGTACCTCTATCTTGGTGACCTGGTTAAAAAGCGTCTA 653  
 |||  
 Sbjct 181 CTATGGATCTGATCTGGGGCCAGGTACCTCTATCTTGGGGATCTGGTTAAAAAACGTCTA 240

Query 654 GTGGGCCAAA 663  
 |||  
 Sbjct 241 GTGGGCCAAA 250

>SRR2298573.401580 401580 length=500  
 Length=500

Score = 433 bits (234), Expect = 5e-117  
 Identities = 244/249 (98%), Gaps = 0/249 (0%)  
 Strand=Plus/Plus

Query 455 TAACAAACCCTTTAGGATTGGTTCTAAACCTGAGATGTTGTGGAAGATACTTAGTACCTG 514  
 |||  
 Sbjct 2 TAACAAACCCTTTAGGATTGGTTCTAAACCTGAGATGTTGTGGAAGATACTTAGTACCTA 61

Query 515 CCGATCTGGTAGTACTGCAAACACTAGTTGTAAGGCCACGAAGGATGCCCAGAAGGTAC 574  
 |||  
 Sbjct 62 CCGATCTGGTAGTACTGCAAACACTAGTTGTAAGGCCACGAAGGATGCCCAGAAGGTAC 121

Query 575 CCATAGGTAACAAGTGACACTATGGATCTGATCTGGGGCCAGGTACCTCTATCTTGGTGA 634  
 |||  
 Sbjct 122 CCATAGGTAACAAGCGACACTATGGATCTGATCTGGGGCCAGGTACCTCTATCTTGGTGA 181

Query 635 CCTGGTTAAAAAGCGTCTAGTGGGCCAAAACCCgggggggATCCCCGGTTTCCTTTTATTT 694  
 |||  
 Sbjct 182 TCTGGTTAAAAAACGTCTAGTGGGCCAAAACCCGGGGGGGATCCCCGGTTTCCTTTTATTT 241

Query 695 TATCAATGC 703  
 |||

Sbjct 242 TATCAATGC 250

Score = 363 bits (196), Expect = 7e-96  
Identities = 230/247 (93%), Gaps = 0/247 (0%)  
Strand=Plus/Minus

|       |     |                                                                |     |
|-------|-----|----------------------------------------------------------------|-----|
| Query | 657 | GGCCAAACCCgggggggATCCCCGGTTTCCTTTTATTTTATCAATGCTACAATGGAGACA   | 716 |
|       |     |                                                                |     |
| Sbjct | 499 | GGCCAAACCCGGGGGGGATCCCCGGTTTCCTTTTATTTTAGCAATGCCACTATGGAGCCA   | 440 |
| Query | 717 | ATTAAAAAGTATTGACAGATATGGCGACCGGAGTGGTCAGTTCAGTTGATTCCACTATCAAT | 776 |
|       |     |                                                                |     |
| Sbjct | 439 | ATTAAGAGTATTGCAAATATGGCTACCGGAGTGGTCAGTTCAGTTGATTCCACTATCAAT   | 380 |
| Query | 777 | GCAGTTAATGAGAGAGTAGAAAAATGTGGGCAATGAAATTGGAGGTAACCTATTAACCAAAA | 836 |
|       |     |                                                                |     |
| Sbjct | 379 | GTAGTTAATGAGAGAGTGGAAAAATGTAGGTAATGAAATTGGAGGTAATTTATTAACCAAAA | 320 |
| Query | 837 | GTAGCAGATGATGCTTCTAATGTGCTTGGACCAAATTGTTATGCTACAACAGCTGAACCA   | 896 |
|       |     |                                                                |     |
| Sbjct | 319 | GTTGCAGATGATGCTTCTAATGTGCTCGGACCAAATTGCTATGCTACAACAGCTGAACCA   | 260 |
| Query | 897 | GAGAACA 903                                                    |     |
|       |     |                                                                |     |
| Sbjct | 259 | GAGAACA 253                                                    |     |

>SRR2298573.350726 350726 length=500  
Length=500

Score = 433 bits (234), Expect = 5e-117  
Identities = 244/249 (98%), Gaps = 0/249 (0%)  
Strand=Plus/Minus

|       |     |                                                               |     |
|-------|-----|---------------------------------------------------------------|-----|
| Query | 455 | TAACAAACCCTTTAGGATTGGTTCTAAACCTGAGATGTTGTGGGAAGATACTTAGTACCTG | 514 |
|       |     |                                                               |     |
| Sbjct | 249 | TAACAAACCCTTTAGGATTGGTTCTAAACCTGAGATGTTGTGGGAAGATACTTAGTACCTA | 190 |
| Query | 515 | CCGATCTGGTAGTACTGCAAACACTAGTTGTAAGGCCACGAAGGATGCCCAGAAGGTAC   | 574 |
|       |     |                                                               |     |
| Sbjct | 189 | CCGATCTGGTAGTACTGCAAACACTAGTTGTAAGGCCACGAAGGATGCCCAGAAGGTAC   | 130 |
| Query | 575 | CCATAGGTAACAAGTGACACTATGGATCTGATCTGGGGCCAGGTACCTCTATCTTGGTGA  | 634 |
|       |     |                                                               |     |
| Sbjct | 129 | CCATAGGTAACAAGCGACACTATGGATCTGATCTGGGGCCAGGTACCTCTATCTTGGTGA  | 70  |
| Query | 635 | CCTGGTTAAAAAGCGTCTAGTGGGCCAAACCCgggggggATCCCCGGTTTCCTTTTATTT  | 694 |
|       |     |                                                               |     |
| Sbjct | 69  | TCTGGTTAAAAACGTCTAGTGGGCCAAACCCGGGGGGGATCCCCGGTTTCCTTTTATTT   | 10  |
| Query | 695 | TATCAATGC 703                                                 |     |
|       |     |                                                               |     |
| Sbjct | 9   | TATCAATGC 1                                                   |     |

Score = 348 bits (188), Expect = 2e-91  
Identities = 230/251 (92%), Gaps = 0/251 (0%)  
Strand=Plus/Plus

```

Query 390 AAGCATCCTATTGCCAGCGGAACAACACCTGGTAACAGGTGCCTCTGGGGCCAAAAGCCA 449
          |||
Sbjct 249 AAGCATCCTATTGCCAGCGGAACACCACCTGGTAACAGGTGCCTCTGGGGCCAAAAGCCA 308

Query 450 AGGTCTAACAAACCCTTTAGGATTGGTTCTAAACCTGAGATGTTGTGGAAGATACTTAGT 509
          |||
Sbjct 309 AGGTTTAACCAACCCTCTAGGATTGGTTCTAAACCTGAGATGTTGTGGAAGATACTTAGT 368

Query 510 ACCTGCCGATCTGGTAGTACTGCAAACACTAGTTGTAAGGCCACGAAGGATGCCAGAA 569
          |||
Sbjct 369 ACCTACCGATCTGGTAGTACTGCAAACACTAGTTGTAAGGCCATGAAGGAGGCCAGAA 428

Query 570 GGTACCCATAGGTAACAAGTGACACTATGGATCTGATCTGGGGCCAGGTACCTCTATCTT 629
          ||
Sbjct 429 GGAACCCATAGGAAAAAAGCGACCTATGGAACGGATCTGGGGCCAGGGACCCCTACCTT 488

Query 630 GGTGACCTGGT 640
          ||
Sbjct 489 GGGGATCTGGT 499

```

>SRR2298573.330438 330438 length=500  
Length=500

Score = 433 bits (234), Expect = 5e-117  
Identities = 244/249 (98%), Gaps = 0/249 (0%)  
Strand=Plus/Minus

```

Query 340 GAGACGTCTGGTGACGTGTGGGAACTTATTGGAAGCAACATTTTGCTGCAAAGCATCCTA 399
          |||
Sbjct 250 GAGACGTCTGGTGACGTGTGGGAACTTATTGGAACAACATTTTGCTGTAAAGCATCCTA 191

Query 400 TTGCCAGCGGAACAACACCTGGTAACAGGTGCCTCTGGGGCCAAAAGCCAAGGTCTAACA 459
          |||
Sbjct 190 TTGCCAGCGGAACAACACCTGGTAACAGGTGCCTCTGGGGCCAAAAGCCAAGGTTAACA 131

Query 460 AACCCCTTTAGGATTGGTTCTAAACCTGAGATGTTGTGGAAGATACTTAGTACCTGCCGAT 519
          |||
Sbjct 130 AACCCCTTTAGGATTGGTTCTAAACCTGAGATGTTGTGGAAGATACTTAGTACCTACCGAT 71

Query 520 CTGGTAGTACTGCAAACACTAGTTGTAAGGCCACGAAGGATGCCAGAAAGGTACCCATA 579
          |||
Sbjct 70 CTGGTAGTACTGCAAACACTAGTTGTAAGGCCACGAAGGATGCCAGAAAGGTACCCATA 11

Query 580 GGTAACAAG 588
          |||
Sbjct 10 GGTAACAAG 2

```

Score = 337 bits (182), Expect = 4e-88  
Identities = 227/249 (91%), Gaps = 1/249 (0%)  
Strand=Plus/Plus

```

Query 151 TGCCTGGTCTCCACTGGTTGAAGGCAACTTGCAATAAAAATGAGTGGGAACAAGACGCTTA 210
          |||
Sbjct 251 TGCCTGGTCTCCACTAGTTGAAGGCAACTTGCAATAAAAATGAGTGGGAACAAGACGCTTA 310

Query 211 AAGCATGGTGTGAACTAAC-TTTCTAACCCACATTTTGTGTGGGGTGGCAGATGGCGTGC 269

```





```

Query 457 ACAAACCCCTTTAGGATTGGTTCTAAACCTGAGATGTTGTGGAAGATACTTAGTACCTGCC 516
          |||
Sbjct 431 ACAAACCCCTTTAGGATTGGTTCTAAACCTGAGATGTTGTGGAAGAGACTTAGTACCTACC 490

Query 517 GATCTGGTAG 526
          | |||
Sbjct 491 GTTCTGGTAG 500

```

>SRR2298573.300070 300070 length=500  
Length=500

Score = 433 bits (234), Expect = 5e-117  
Identities = 253/262 (97%), Gaps = 2/262 (1%)  
Strand=Plus/Plus

```

Query 313 CACACAGCCATCCTCTAGTAAGTTTGTGAGACGTCTGGTGACGTGTGGGAACTTATTGGA 372
          |||
Sbjct 241 CACAC-GTCA-CCTCTAGTAAGTTTGTGAGACGTCTGGTGACGTGTGGGAACTTATTGGA 298

Query 373 AGCAACATTTTGCTGCAAAGCATCCTATTGCCAGCGGAACAACACCTGGTAACAGGTGCC 432
          | |||
Sbjct 299 AACCAACATTTTGCTGTAAAGCATCCTATTGCCAGCGGAACAACACCTGGTAACAGGTGCC 358

Query 433 TCTGGGGCCAAAAGCCAAGGTCTAACAAACCCCTTTAGGATTGGTTCTAAACCTGAGATGT 492
          |||
Sbjct 359 TCTGGGGCCAAAAGCCAAGGTCTAACAAACCCCTTTAGGATTGGTTCTAAACCTGAGATGG 418

Query 493 TGTGGAAGATACTTAGTACCTGCCGATCTGGTAGTACTGCAAACACTAGTTGTAAGGCC 552
          |||
Sbjct 419 TGTGGAAGATACTTAGTACCTACCGATCTGGTAGTACTGCAAACACTAGTTGTAAGGCC 478

Query 553 ACGAAGGATGCCCAGAAGGTAC 574
          |||
Sbjct 479 ACGAAGGATGCCCAGAAGGTAC 500

```

Score = 431 bits (233), Expect = 2e-116  
Identities = 245/251 (98%), Gaps = 0/251 (0%)  
Strand=Plus/Minus

```

Query 349 GGTGACGTGTGGGAACTTATTGGAAGCAACATTTTGCTGCAAAGCATCCTATTGCCAGCG 408
          |||
Sbjct 251 GGTGACGTGTGGGAACTTATTGGAACAACATTTTGCTGTAAAGCATCCTATTGCCAGCG 192

Query 409 GAACAACACCTGGTAACAGGTGCCTCTGGGGCCAAAAGCCAAGGTCTAACAAACCCCTTTA 468
          |||
Sbjct 191 GAACAACACCTGGTAACAGGTGCCTCTGGGGCCAAAAGCCAAGGTCTAACAAACCCCTTTA 132

Query 469 GGATTGGTTCTAAACCTGAGATGTTGTGGAAGATACTTAGTACCTGCCGATCTGGTAGTA 528
          |||
Sbjct 131 GGATTGGTTCTAAACCTGAGATGTTGTGGAAGATACTTAGTACCTACCGATCTGGTAGTA 72

Query 529 CTGCAAACACTAGTTGTAAGGCCACGAAGGATGCCCAGAAGGTACCCATAGGTAACAAG 588
          |||
Sbjct 71 GTGCAAACACTAGTTGTAAGGCCACGAAGGATGCCCAGAAGGTACCCATAGGTAACAAG 12

Query 589 TGACACTATGG 599

```

|||||||  
Sbjct 11 CGACACTATGG 1

>SRR2298573.280250 280250 length=500  
Length=500

Score = 433 bits (234), Expect = 5e-117  
Identities = 248/255 (97%), Gaps = 0/255 (0%)  
Strand=Plus/Plus

Query 439 GCCAAAAGCCAAGGTCTAACAAACCCTTTAGGATTGGTTCTAAACCTGAGATGTTGTGGA 498  
|||||||  
Sbjct 1 GCCAAAAGCCAAGGTCTAACAAACCCTTTAGGATTGGTTCTAAACCTGAGATGTTGTGGA 60

Query 499 AGATACTTAGTACCTGCCGATCTGGTAGTACTGCAAACACTAGTTGTAAGGCCACGAAG 558  
|||||||  
Sbjct 61 AGATACTTAGTACCTACCGATCTGGTAGTAGTGCAAACACTAGTTGTAAGGCCACGAAG 120

Query 559 GATGCCCAGAAGGTACCCATAGGTAACAAGTGACACTATGGATCTGATCTGGGGCCAGGT 618  
|||||||  
Sbjct 121 GATGCCCAGAAGGTACCCATAGGTAACAAGCGACACTATGGATCTGATCTGGGGCCAGGT 180

Query 619 ACCTCTATCTTGGTGACCTGGTTAAAAAGCGTCTAGTGGGCCAAACCCgggggggATCCC 678  
|||||||  
Sbjct 181 ACCTCTATCTTGGTGATCTGGTTAAAAAACGTCCTAGTGGGCCAAACCCGGGGGGGATCCC 240

Query 679 CGGTTTCCTTTTATT 693  
|||||||  
Sbjct 241 CGGTTTCCTTTAATT 255

Score = 398 bits (215), Expect = 2e-106  
Identities = 239/251 (95%), Gaps = 0/251 (0%)  
Strand=Plus/Minus

Query 472 TTGGTTCTAAACCTGAGATGTTGTGGAAGATACTTAGTACCTGCCGATCTGGTAGTACTG 531  
|||||||  
Sbjct 499 TTGGTTCTAAACCTGGGATGTTGGGGAAGCTGCTTTGTACCTACCGATCTGGTAGTAGTG 440

Query 532 CAAACACTAGTTGTAAGGCCACGAAGGATGCCCAGAAGGTACCCATAGGTAACAAGTGA 591  
|||||||  
Sbjct 439 CAAACACTAGTTGTAAGGCCACGAAGGATGCCCAGAAGGTACCCATAGGTAACAAGCGA 380

Query 592 CACTATGGATCTGATCTGGGGCCAGGTACCTCTATCTTGGTGACCTGGTTAAAAAGCGTC 651  
|||||||  
Sbjct 379 CACTATGGATCTGATCTGGGGCCAGGTACCTCTATCTTGGTGATCTGGTTAAAAAACGTC 320

Query 652 TAGTGGGCCAAACCCgggggggATCCCCGGTTTCCTTTTATTTTATCAATGCTACAATGG 711  
|||||||  
Sbjct 319 TAGTGGGCCAAACCCGGGGGGGATCCCCGGTTTCCTTTTATTTTATCAATGCCACTATGG 260

Query 712 AGACAATTAAA 722  
|||||||  
Sbjct 259 AGACAATTAAA 249

>SRR2298573.250564 250564 length=500  
Length=500

Score = 433 bits (234), Expect = 5e-117  
Identities = 244/249 (98%), Gaps = 0/249 (0%)  
Strand=Plus/Plus

```
Query 296 CTTGTGGACCTTATGCTCACACAGCCATCCTCTAGTAAGTTTGTGAGACGTCTGGTGACG 355
          |||
Sbjct 1 CTTGTGGACCTTATGCTCACACAGCCATCCTCTAGTAAGTTTGTGAGACGTCTGGTGACG 60

Query 356 TGTGGGAACTTATTGGAAGCAACATTTTGGCTGCAAAGCATCCTATTGCCAGCGGAACAAC 415
          |||
Sbjct 61 TGTGGGAACTTATTGGAACAACATTTTGGCTGTAAAGCATCCTATTGCCAGCGGAACAAC 120

Query 416 ACCTGGTAACAGGTGCCTCTGGGGCCAAAAGCCAAGGTCTAACAAACCCTTTAGGATTGG 475
          |||
Sbjct 121 ACCTGGTAACAGGTGCCTCTGGGGCCAAAAGCCAAGGTCTAACAAACCCTTTAGGATTGG 180

Query 476 TTCTAAACCTGAGATGTTGTGGAAGATACTTAGTACCTGCCGATCTGGTAGTACTGCAAA 535
          |||
Sbjct 181 TTCTAAACCTGAGATGTTGTGGAAGATACTTAGTACCTACCGATCTGGTAGTACTGCAAA 240

Query 536 CACTAGTTG 544
          |||
Sbjct 241 CACTAGTTG 249
```

Score = 366 bits (198), Expect = 6e-97  
Identities = 229/244 (94%), Gaps = 2/244 (1%)  
Strand=Plus/Minus

```
Query 357 GTGGGAACTTATTGGAAGCAACATTT-TGCTGCAAAGCATCCTATTGCCAGCGGAACAAC 415
          |||
Sbjct 493 GTGGGAACTTTTGGAAACAACATTTGTGTTG-AAAGGATCCTTTTGCCCGGGGAACAAC 435

Query 416 ACCTGGTAACAGGTGCCTCTGGGGCCAAAAGCCAAGGTCTAACAAACCCTTTAGGATTGG 475
          |||
Sbjct 434 CCCTGGTAACAGGTGCCTCTGGGGCCAAAAGCCAAGGTCTAACAAACCCTTTAGGATTGG 375

Query 476 TTCTAAACCTGAGATGTTGTGGAAGATACTTAGTACCTGCCGATCTGGTAGTACTGCAAA 535
          |||
Sbjct 374 TTCTAAACCTGAGATGTTGGGGAAGATACTTAGTACCTACCGATCTGGTAGTACTGCAAA 315

Query 536 CACTAGTTGTAAGGCCACGAAGGATGCCAGAAAGGTACCCATAGGTAACAAGTGACACT 595
          |||
Sbjct 314 CACTAGTTGTAAGGCCACGAAGGATGCCAGAAAGGTACCCATAGGTAACAAGCGACACT 255

Query 596 ATGG 599
          |||
Sbjct 254 ATGG 251
```

>SRR2298573.191538 191538 length=500  
Length=500

Score = 433 bits (234), Expect = 5e-117  
Identities = 246/252 (98%), Gaps = 0/252 (0%)  
Strand=Plus/Plus

```
Query 435 TGGGGCCAAAAGCCAAGGTCTAACAAACCCTTTAGGATTGGTTCTAAACCTGAGATGTTG 494
```

```

|||||
Sbjct 249 TGGGGCCAAAAGCCAAGGTTTAAACAAACCCTTTAGGATTGGTTCTAAACCTGAGATGTTG 308
Query 495 TGGAAGATACTTAGTACCTGCCGATCTGGTAGTACTGCAAACACTAGTTGTAAGGCCAC 554
|||||
Sbjct 309 TGGAAGATACTTAGTACCTACCGATCTGGTAGTAGTGCAAACACTAGTTGTAAGGCCAC 368
Query 555 GAAGGATGCCCAGAAGGTACCCATAGGTAACAAGTGACACTATGGATCTGATCTGGGGCC 614
|||||
Sbjct 369 GAAGGATGCCCAGAAGGTACCCATAGGTAACAAGCGACACTATGGATCTGATCTGGGGCC 428
Query 615 AGGTACCTCTATCTTGGTGACCTGGTTAAAAAGCGTCTAGTGGGCCAAAACCCgggggggA 674
|||||
Sbjct 429 AGGTACCTCTATCTTGGTGATCTGGTTAAAAAACGTCTAGTGGGCCAAAACCCGGGGGGGA 488

Query 675 TCCCCGGTTTCC 686
|||||
Sbjct 489 TCCCCGGTTTCC 500

```

Score = 420 bits (227), Expect = 4e-113  
Identities = 241/248 (97%), Gaps = 0/248 (0%)  
Strand=Plus/Minus

```

Query 515 CCGATCTGGTAGTACTGCAAACACTAGTTGTAAGGCCACGAAGGATGCCCAGAAGGTAC 574
|||||
Sbjct 248 CCGATCTGGTAGTAGTGCAAACACTAGTTGTAAGGCCACGAAGGATGCCCAGAAGGTAC 189

Query 575 CCATAGGTAACAAGTGACACTATGGATCTGATCTGGGGCCAGGTACCTCTATCTTGGTGA 634
|||||
Sbjct 188 CCATAGGTAACAAGCGACACTATGGATCTGATCTGGGGCCAGGTACCTCTATCTTGGTGA 129

Query 635 CCTGGTTAAAAAGCGTCTAGTGGGCCAAAACCCgggggggATCCCCGGTTTCCTTTTATTT 694
|||||
Sbjct 128 TCTGGTTAAAAAACGTCTAGTGGGCCAAAACCCGGGGGGGATCCCCGGTTTCCTTTTATTT 69

Query 695 TATCAATGCTACAATGGAGACAATTAAGAGTATTGCAGATATGGCGACCGGAGTGGTCAG 754
|||||
Sbjct 68 TATCAATGCCACTATGGAGACAATTAAGAGTATTGCAGATATGGCGACCGGAGTGGTCAG 9

Query 755 TTCAGTTG 762
|||||
Sbjct 8 TTCAGTTG 1

```

>SRR2298573.142735 142735 length=500  
Length=500

Score = 433 bits (234), Expect = 5e-117  
Identities = 244/249 (98%), Gaps = 0/249 (0%)  
Strand=Plus/Minus

```

Query 375 CAACATTTTGCTGCAAAGCATCCTATTGCCAGCGGAACAACACCTGGTAACAGGTGCCTC 434
|||||
Sbjct 249 CAACATTTTGCTGTAAAGCATCCTATTGCCAGCGGAACAACACCTGGTAACAGGTGCCTC 190

Query 435 TGGGGCCAAAAGCCAAGGTTTAAACAAACCCTTTAGGATTGGTTCTAAACCTGAGATGTTG 494
|||||
Sbjct 189 TGGGGCCAAAAGCCAAGGTTTAAACAAACCCTTTAGGATTGGTTCTAAACCTGAGATGTTG 130

```

```

Query 495 TGGAAAGATACTTAGTACCTGCCGATCTGGTAGTACTGCAAACACTAGTTGTAAGGCCAC 554
          |||
Sbjct 129 TGGAAAGATACTTAGTACCTACCGATCTGGTAGTAGTGCAAACACTAGTTGTAAGGCCAC 70

Query 555 GAAGGATGCCCAGAAGGTACCCATAGGTAACAAGTGACACTATGGATCTGATCTGGGGCC 614
          |||
Sbjct 69 GAAGGATGCCCAGAAGGTACCCATAGGTAACAAGCGACACTATGGATCTGATCTGGGGCC 10

Query 615 AGGTACCTC 623
          |||
Sbjct 9 AGGTACCTC 1

```

Score = 414 bits (224), Expect = 2e-111  
Identities = 242/251 (96%), Gaps = 0/251 (0%)  
Strand=Plus/Plus

```

Query 336 TTGTGAGACGTCTGGTGACGTGTGGGAACTTATTGGAAGCAACATTTTGCTGCAAAGCAT 395
          |||
Sbjct 250 TTGTGAGACGTCTGGTGACGTGTGGGAACTTATTGGAACAACATTTTGCTGTAAAGCAT 309

Query 396 CCTATTGCCAGCGGAACAACACCTGGTAACAGGTGCCTCTGGGGCCAAAAGCCAAGGTCT 455
          |||
Sbjct 310 CCTATTGCCAGCGGAACAACACCTGGTAACAGGTGCCTCTGGGGCCAAAAGCCAAGGTTT 369

Query 456 AACAAACCCCTTTAGGATTGGTTCTAAACCTGAGATGTTGTGGAAGATACTTAGTACCTGC 515
          |||
Sbjct 370 AACAAACCCCTTTAGGATTGGTTCTAAACCTGAGATGTTGTGGAAGATACTTAGTACCTAC 429

Query 516 CGATCTGGTAGTACTGCAAACACTAGTTGTAAGGCCACGAAGGATGCCCAGAAGGTACC 575
          |||
Sbjct 430 CGATCTGGTAGTACTGCAAACACTAGTTGTAAGGCCCCGAAGGATGACCAGAAGGGACC 489

Query 576 CATAGGTAACA 586
          ||
Sbjct 490 CAAAGGTAACA 500

```

>SRR2298573.100807 100807 length=500  
Length=500

Score = 433 bits (234), Expect = 5e-117  
Identities = 244/249 (98%), Gaps = 0/249 (0%)  
Strand=Plus/Minus

```

Query 327 CTAGTAAGTTTGTGAGACGTCTGGTGACGTGTGGGAACTTATTGGAAGCAACATTTTGCT 386
          |||
Sbjct 249 CTAGTAAGTTTGTGAGACGTCTGGTGACGTGTGGGAACTTATTGGAACAACATTTTGCT 190

Query 387 GCAAAGCATCCTATTGCCAGCGGAACAACACCTGGTAACAGGTGCCTCTGGGGCCAAAAG 446
          |
Sbjct 189 GTAAAGCATCCTATTGCCAGCGGAACAACACCTGGTAACAGGTGCCTCTGGGGCCAAAAG 130

Query 447 CCAAGGTCTAACAAACCCCTTTAGGATTGGTTCTAAACCTGAGATGTTGTGGAAGATACTT 506
          |||
Sbjct 129 CCAAGGTTTAAACAAACCCCTTTAGGATTGGTTCTAAACCTGAGATGTTGTGGAAGATACTT 70

Query 507 AGTACCTGCCGATCTGGTAGTACTGCAAACACTAGTTGTAAGGCCACGAAGGATGCCCA 566

```

```

          |||||
Sbjct 69  AGTACCTACCGATCTGGTAGTAGTGCAAACACTAGTTGTAAGGCCACGAAGGATGCCCA 10
Query 567 GAAGGTACC 575
          |||||
Sbjct 9   GAAGGTACC 1

```

```

Score = 390 bits (211), Expect = 3e-104
Identities = 237/250 (95%), Gaps = 0/250 (0%)
Strand=Plus/Plus

```

```

Query 317  CAGCCATCCTCTAGTAAGTTTGTGAGACGTCTGGTGACGTGTGGGAACTTATTGGAAGCA 376
          |||
Sbjct 251  CAGCCATCCTCTAGTAAGTTTGTGAGACGTCTGGTGACGTGTGGGAACTTATTGGAACA 310

Query 377  ACATTTTGCTGCAAAGCATCCTATTGCCAGCGGAACAACACCTGGTAACAGGTGCCTCTG 436
          |||
Sbjct 311  ACATTTTGCTGTAAAGCATCCTATTGCCAGCGGAACAACACCTGGTAACAGGTGCCTCTG 370

Query 437  GGGCCAAAAGCCAAGGTCTAACAACCCTTTAGGATTGGTTCTAAACCTGAGATGTTGTG 496
          |||
Sbjct 371  GGGCCAAAAGCCAAGGTCTAACAACCCTTTAGGATTGGTTCTAACCCTGAGATGTTGTG 430

Query 497  GAAGATACTTAGTACCTGCCGATCTGGTAGTACTGCAAACACTAGTTGTAAGGCCACGA 556
          |||
Sbjct 431  GAAGATACTTAGTACCTACCGAACTGGTAGTAGGGCAAAAACCAGTTGAAAGGGCCACGA 490

Query 557  AGGATGCCCA 566
          |||
Sbjct 491  AGGAGGCCCA 500

```

```

>SRR2298573.93103 93103 length=500
Length=500

```

```

Score = 433 bits (234), Expect = 5e-117
Identities = 244/249 (98%), Gaps = 0/249 (0%)
Strand=Plus/Plus

```

```

Query 338  GTGAGACGTCTGGTGACGTGTGGGAACTTATTGGAAGCAACATTTTGCTGCAAAGCATCC 397
          |||
Sbjct 252  GTGAGACGTCTGGTGACGTGTGGGAACTTATTGGAACAACATTTTGCTGTAAAGCATCC 311

Query 398  TATTGCCAGCGGAACAACACCTGGTAACAGGTGCCTCTGGGGCCAAAAGCCAAGGTCTAA 457
          |||
Sbjct 312  TATTGCCAGCGGAACAACACCTGGTAACAGGTGCCTCTGGGGCCAAAAGCCAAGGTTTAA 371

Query 458  CAAACCCTTTAGGATTGGTTCTAAACCTGAGATGTTGTGGAAGATACTTAGTACCTGCCG 517
          |||
Sbjct 372  CAAACCCTTTAGGATTGGTTCTAAACCTGAGATGTTGTGGAAGATACTTAGTACCTACCG 431

Query 518  ATCTGGTAGTACTGCAAACACTAGTTGTAAGGCCACGAAGGATGCCCAGAAGGTACCCA 577
          |||
Sbjct 432  ATCTGGTAGTACTGCAAACACTAGTTGTAAGGCCACGAAGGATGCCCAGAAGGTACCCA 491

Query 578  TAGGTAACA 586
          |||
Sbjct 492  TAGGTAACA 500

```

Score = 429 bits (232), Expect = 7e-116  
Identities = 244/250 (98%), Gaps = 0/250 (0%)  
Strand=Plus/Minus

```
Query 382 TTGCTGCAAAGCATCCTATTGCCAGCGGAACAACACCTGGTAACAGGTGCCTCTGGGGCC 441
||||| ||||| |||||||||||||||||||||||||||||||||||||||||||
Sbjct 250 TTGCTGTAAAGCCTCCTATTGCCAGCGGAACAACACCTGGTAACAGGTGCCTCTGGGGCC 191

Query 442 AAAAGCCAAGGTCTAACAAACCCTTTAGGATTGGTTCTAAACCTGAGATGTTGTGGAAGA 501
||||| ||||| |||||||||||||||||||||||||||||||||||||||||||
Sbjct 190 AAAAGCCAAGGTTTAACAAACCCTTTAGGATTGGTTCTAAACCTGAGATGTTGTGGAAGA 131

Query 502 TACTTAGTACCTGCCGATCTGGTAGTACTGCAAACACTAGTTGTAAGGCCACGAAGGAT 561
||||| ||||| |||||||||||||||||||||||||||||||||||||||||||
Sbjct 130 TACTTAGTACCTACCGATCTGGTAGTACTGCAAACACTAGTTGTAAGGCCACGAAGGAT 71

Query 562 GCCCAGAAGGTACCCATAGGTAACAAGTGACACTATGGATCTGATCTGGGGCCAGGTACC 621
||||| ||||| |||||||||||||||||||||||||||||||||||||||||||
Sbjct 70 GCCCAGAAGGTACCCATAGGTAACAAGTGACACTATGGATCTGATCTGGGGCCAGGTACC 11

Query 622 TCTATCTTGG 631
|||||
Sbjct 10 TCTATCTTGG 1
```

>SRR2298573.59417 59417 length=500  
Length=500

Score = 433 bits (234), Expect = 5e-117  
Identities = 244/249 (98%), Gaps = 0/249 (0%)  
Strand=Plus/Plus

```
Query 455 TAACAAACCCCTTTAGGATTGGTTCTAAACCTGAGATGTTGTGGAAGATACTTAGTACCTG 514
||||| ||||| |||||||||||||||||||||||||||||||||||||||||||
Sbjct 2 TAACAAACCCCTTTAGGATTGGTTCTAAACCTGAGATGTTGTGGAAGATACTTAGTACCTA 61

Query 515 CCGATCTGGTAGTACTGCAAACACTAGTTGTAAGGCCACGAAGGATGCCCAGAAGGTAC 574
||||| ||||| |||||||||||||||||||||||||||||||||||||||||||
Sbjct 62 CCGATCTGGTAGTACTGCAAACACTAGTTGTAAGGCCACGAAGGATGCCCAGAAGGTAC 121

Query 575 CCATAGGTAACAAGTGACACTATGGATCTGATCTGGGGCCAGGTACCTCTATCTTGGTGA 634
||||| ||||| |||||||||||||||||||||||||||||||||||||||||||
Sbjct 122 CCATAGGTAACAAGCGACACTATGGATCTGATCTGGGGCCAGGTACCTCTATCTTGGTGA 181

Query 635 CCTGGTTAAAAAGCGTCTAGTGGGCCAAAACCCgggggggATCCCCGGTTTCCTTTTATTT 694
||||| ||||| |||||||||||||||||||||||||||||||||||||||||||
Sbjct 182 TCTGGTTAAAAACGTCTAGTGGGCCAAAACCCGGGGGGGATCCCCGGTTTCCTTTTATTT 241

Query 695 TATCAATGC 703
|||||
Sbjct 242 TATCAATGC 250
```

Score = 387 bits (209), Expect = 4e-103  
Identities = 235/248 (95%), Gaps = 0/248 (0%)  
Strand=Plus/Minus



```
Query 483 CCTGAGATGTTGTGGAAGATACTTAGTACCTGCCGATCTGGTAGTACTGCAAACACTAGT 542
||||| |||||||||||||||||| ||||| ||| ||| |||||||||| |||||||||||
Sbjct 498 CCTGGGATGTTGTGGAAGATTCTTAGGTCTACCGGTCTGGTAGTAGTGCAAACACTAGT 439

Query 543 TGTAAGGCCACGAAGGATGCCAGAAAGGTACCCATAGGTAACAAGTGACACTATGGATC 602
||||| |||||||||||||||||| ||||||||||| ||||||||||| |||||||||||
Sbjct 438 TGTAAGGCCACGAAGGATGCCAGAAAGGTACCCATAGGTAACAAGCGACACTATGGATC 379

Query 603 TGATCTGGGGCCAGGTACCTCTATCTTGGTGACCTGGTTAAAAAGCGTCTAGTGGGCCAA 662
||||| |||||||||||||||||| ||||||||||| ||||||||||| |||||||||||
Sbjct 378 TGATCTGGGGCCAGGTACCTCTATCTTGGTGATCTGGTTAAAAAACGCTAGTGGGCCAA 319

Query 663 ACCCGgggggggATCCCCGGTTTCCTTTTATTTTATCAATGCTACAATGGAGACAATTAAA 722
||||| |||||||||||||||||| ||||||||||| || |||||||||||
Sbjct 318 ACCCGGGGGGGATCCCCGGTTTCCTTTTATTTTATCAATGCCACTATGGAGACAATTAA 259

Query 723 AGTATTGC 730
|||||
Sbjct 258 AGTATTGC 251
```

>SRR2298573.13345 13345 length=500  
Length=500

Score = 433 bits (234), Expect = 5e-117  
Identities = 246/252 (98%), Gaps = 0/252 (0%)  
Strand=Plus/Minus

```
Query 330 GTAAGTTTGTGAGACGTCTGGTGACGTGTGGGAACCTTATTGGAAGCAACATTTTGCTGCA 389
||||| |||||||||||||||||| ||||||||||| ||||||||||| ||
Sbjct 500 GTAAGTTTGGGAGACGTCTGGTGACGTGTGGGAACCTTATTGGAAACAACATTTTGCTGTA 441

Query 390 AAGCATCCTATTGCCAGCGGAACAACACCTGGTAACAGGTGCCTCTGGGGCCAAAAGCCA 449
||||| |||||||||||||||||| ||||||||||| |||||||||||
Sbjct 440 AAGCATCCTATTGCCAGCGGAACAACACCTGGTAACAGGTGCCTCTGGGGCCAAAAGCCA 381

Query 450 AGGTCTAACAAAACCCCTTTAGGATTTGGTTCTAAACCTGAGATGTTGTGGAAGATACTTAGT 509
||||| |||||||||||||||||| ||||||||||| |||||||||||
Sbjct 380 AGGTTTAAACAAAACCCCTTTAGGATTTGGTTCTAAACCTGAGATGTTGTGGAAGATACTTAGT 321

Query 510 ACCTGCCGATCTGGTAGTACTGCAAACACTAGTTGTAAGGCCACGAAGGATGCCAGAA 569
||||| |||||||||||||||||| ||||||||||| |||||||||||
Sbjct 320 ACCTACCGATCTGGTAGTAGTGCAAACACTAGTTGTAAGGCCACGAAGGATGCCAGAA 261

Query 570 GGTACCCATAGG 581
|||||
Sbjct 260 GGTACCCATAGG 249
```

Score = 431 bits (233), Expect = 2e-116  
Identities = 250/258 (97%), Gaps = 1/258 (0%)  
Strand=Plus/Plus

```
Query 327 CTAGTAAGTTTGTGAGACGTCTGGTGACGTGTGGGAACCTTATTGGAAGCAACATTTTGCT 386
||||| |||||||||||||||||| ||||||||||| |||||||||||
Sbjct 1 CTAGTAAGTTTGTGAGACGTCTGGTGACGTGTGGGAACCTTATTGGAAAACAACATTTTGCT 60

Query 387 GCAAAGCATCCTATTGCCAGCGGAACAACACCTGGTAACAGGTGCCTCTGGGGCCAAAAG 446
| |||||||||||||||||| ||||||||||| |||||||||||
```

Sbjct 61 GTAAAGCATCCTATTGCCAGCGGAACAACACCTGGTAACAGGTGCCTCTGGGGCCAAAAG 120

Query 447 CCAAGGTCTAACAAAACCCCTTTAGGATTGGTTCTAAACCTGAGATGTTGTGGAAGATACTT 506  
 |||

Sbjct 121 CCAAGGTTTAAACAAAACCCCTTTAGGATTGGTTCTAAACCTGAGATGTTGTGGAAGATACTT 180

Query 507 AGTACCTGCCGATCTGGTAGTACTGCAAACACTAGTTGTAAGGCCACGAAGGATGCCCA 566  
 |||

Sbjct 181 AGTACCTACCGATCTGGTAGTAGTGCAAACACTAGTTGTAAGGCCACGAAGGATGCCCA 240

Query 567 GAAGGTACCC-ATAGGTA 583  
 |||

Sbjct 241 AAAGGTACCCTATGGGTA 258

>SRR2298546.925026 925026 length=502  
 Length=502

Score = 433 bits (234), Expect = 5e-117  
 Identities = 246/252 (98%), Gaps = 0/252 (0%)  
 Strand=Plus/Minus

Query 1255 CATTGGTGGTGTATGAACCCAAACCTGTTGTGACATATGACTCAAAGTTAGAATTTGGAG 1314  
 |||

Sbjct 252 CATTGGTGGTGTATGAACCCAAACCTGTTGTGACATATGACTCAAAGTTAGAATTTGGAG 193

Query 1315 CATTTACCAATTTACCACATGTATTGATGAATTTGGCTGAGACCACACAGGCTGATTTAT 1374  
 | |||

Sbjct 192 CGTTTACCAATTTACCACATGTGTTGATGAATTTGGCTGAGACCACACAGGCTGATTTAT 133

Query 1375 GTATCCCTATGTTGCTGACACAAACTATGTTAAAACGGATTCGTCAGACTTAGGGCAAC 1434  
 |||

Sbjct 132 GTATCCCTATGTTGCTGACACAAACTATGTTAAAACAGATTCGTCAGACTTAGGGCAAC 73

Query 1435 TAAAAGTCTATGTTTGGACACCTTTATCTATACCTTCAGGTTCTGCGACACAAGTTGATG 1494  
 |||

Sbjct 72 TAAAAGTCTATGTTTGGACACCTTTATCCATACCTTCAGGTTCTGCTACACAAGTTGATG 13

Query 1495 TAACCATATTGG 1506  
 | |||

Sbjct 12 TTACCATATTGG 1

Score = 416 bits (225), Expect = 6e-112  
 Identities = 250/262 (95%), Gaps = 1/262 (0%)  
 Strand=Plus/Plus

Query 1086 ACACCAAC-ATGGGCTAGAGGACATCAGATAACCCATGTGGAATTGCCAAAAGTCTTTTG 1144  
 |||

Sbjct 241 ACACCACCAATGGGCTAGAGGACATCAGATAACCCATGTGGAATACCAAAAAGTCTTTTG 300

Query 1145 GGACAAAAACAGTAAGCCAGCCTATGGCCAATCAAGATACTTTGCAGCAGTACGGTGTGG 1204  
 |||

Sbjct 301 GGACAAAAACAGCAAGCCAGCCTATGGCCAATCAAGATACTTTGCAGCAGTACGGTGTGG 360

Query 1205 CTTTCATTTTCAGGTGCAAGTGAATGTTAACCAAGGAACAGCTGGTAGTGCATTGGTGGT 1264  
 |||

Sbjct 361 TTTTCATTTTCAGGTGCAAGTGAATGTTAATCAAGGAACAGCCGGTAGTGCATTGGTGGT 420

```

Query 1265 GTATGAACCCAAACCTGTTGTGACATATGACTCAAAGTTAGAATTTGGAGCATTACCAA 1324
          |||
Sbjct 421 GTATGAACCCAAACCTGTTGTGACATATGACTCAAAGTTAGAATTTGGAGCGTTACCAA 480

Query 1325 TTTACCACATGTATTGATGAAT 1346
          |||
Sbjct 481 TTTACCACATGTATTGATGAAT 502

```

>SRR2298546.917017 917017 length=500  
Length=500

Score = 433 bits (234), Expect = 5e-117  
Identities = 246/252 (98%), Gaps = 0/252 (0%)  
Strand=Plus/Minus

```

Query 1253 TGCATTGGTGGTGTATGAACCCAAACCTGTTGTGACATATGACTCAAAGTTAGAATTTGG 1312
          |||
Sbjct 500 TGCATTGGTGGTGTATGAACCCAAACCTGTTGTGACATATGACTCAAAGTTAGAATTTGG 441

Query 1313 AGCATTTACCAATTTACCACATGTATTGATGAATTTGGCTGAGACCACACAGGCTGATTT 1372
          |||
Sbjct 440 AGCGTTTACCAATTTACCACATGTATTGATGAATTTGGCTGAGACCACACAGGCTGATTT 381

Query 1373 ATGTATCCCCTATGTTGCTGACACAAACTATGTTAAAACGGATTCGTCAGACTTAGGGCA 1432
          |||
Sbjct 380 ATGTATCCCCTATGTTGCTGACACAAACTATGTTAAAACAGATTCGTCAGACTTAGGGCA 321

Query 1433 ACTAAAAGTCTATGTTTGGACACCTTTATCTATACCTTCAGGTTCTGCGACACAAGTTGA 1492
          |||
Sbjct 320 ACTAAAAGTCTATGTTTGGACACCTTTATCCATACCTTCAGGTTCTGCTACACAAGTTGA 261

Query 1493 TGTAACCATATT 1504
          |||
Sbjct 260 TGTTACCATATT 249

```

Score = 416 bits (225), Expect = 6e-112  
Identities = 241/249 (97%), Gaps = 0/249 (0%)  
Strand=Plus/Plus

```

Query 1175 ATCAAGATACTTTGCAGCAGTACGGTGTGGCTTTCATTTTCAGGTGCAAGTGAATGTTAA 1234
          |||
Sbjct 1 ATCAAGATACTTTGCAGCAGTACGGTGTGGTTCATTTTCAGGTGCAAGTGAATGTTAA 60

Query 1235 CCAAGGAACAGCTGGTAGTGCATTGGTGGTGTATGAACCCAAACCTGTTGTGACATATGA 1294
          |||
Sbjct 61 TCAAGGAACAGCCGGTAGTGCATTGGTGGTGTATGAACCCAAACCTGTTGTGACATATGA 120

Query 1295 CTCAAAGTTAGAATTTGGAGCATTACCAATTTACCACATGTATTGATGAATTTGGCTGA 1354
          |||
Sbjct 121 CTCAAAGTTAGAATTTGGAGCGTTACCAATTTACCACATGTATTGATGAATTTGGCTGA 180

Query 1355 GACCACACAGGCTGATTTATGTATCCCCTATGTTGCTGACACAAACTATGTTAAAACGGA 1414
          |||
Sbjct 181 GACCACACAGGCTGATTTATGTATCCCCTATGTTGCTGACACAAACTATGTTAAAACAGA 240

Query 1415 TTCGTCAGA 1423
          |||

```

Sbjct 241 TTCGTCAGA 249

>SRR2298546.733295 733295 length=502  
Length=502

Score = 433 bits (234), Expect = 5e-117  
Identities = 246/252 (98%), Gaps = 0/252 (0%)  
Strand=Plus/Plus

```
Query 1244 AGCTGGTAGTGCATTGGTGGTGTATGAACCCAAACCTGTTGTGACATATGACTCAAAGTT 1303
          ||| ||||||||||||||||||||||||||||||||||||||||||||||||||||
Sbjct 251 AGCCGGTAGTGCATTGGTGGTGTATGAACCCAAACCTGTTGTGACATATGACTCAAAGTT 310

Query 1304 AGAATTTGGAGCATTACCAATTTACCACATGTATTGATGAATTTGGCTGAGACCACACA 1363
          ||||||||||| |||||||||||||||| ||||||||||||||||||||
Sbjct 311 AGAATTTGGAGCGTTTACCAATTTACCACATGTGTTGATGAATTTGGCTGAGACCACACA 370

Query 1364 GGCTGATTTATGTATCCCCTATGTTGCTGACACAAACTATGTTAAAACGGATTCGTCAGA 1423
          ||||||||||||||||||||||||||||||||||||||||||||
Sbjct 371 GGCTGATTTATGTATCCCCTATGTTGCTGACACAAACTATGTTAAAACAGATTCGTCAGA 430

Query 1424 CTTAGGGCAACTAAAAGTCTATGTTTGGACACCTTTATCTATACCTTCAGGTTCTGCGAC 1483
          ||||||||||||||||||||||||||||||||||||||||
Sbjct 431 CTTAGGGCAACTAAAAGTCTATGTTTGGACACCTTTATCCATACCTTCAGGTTCTGCTAC 490

Query 1484 ACAAGTTGATGT 1495
          ||||||||
Sbjct 491 ACAAGTTGATGT 502
```

Score = 409 bits (221), Expect = 9e-110  
Identities = 241/251 (96%), Gaps = 0/251 (0%)  
Strand=Plus/Minus

```
Query 1319 TACCAATTTACCACATGTATTGATGAATTTGGCTGAGACCACACAGGCTGATTTATGTAT 1378
          ||||||||||| ||||||||||||||||
Sbjct 251 TACCAATTTACCACATGTGTTGATGAATTTGGCTGAGACCACACAGGCTGATTTATGTAT 192

Query 1379 CCCCTATGTTGCTGACACAAACTATGTTAAAACGGATTCGTCAGACTTAGGGCAACTAAA 1438
          ||||||||||||||||||||||||||||||||||||||||
Sbjct 191 CCCCTATGTTGCTGACACAAACTATGTTAAAACAGATTCGTCAGACTTAGGGCAACTAAA 132

Query 1439 AGTCTATGTTTGGACACCTTTATCTATACCTTCAGGTTCTGCGACACAAGTTGATGTAAC 1498
          ||||||||||||||||||||||||||||||||||||||||
Sbjct 131 AGTCTATGTTTGGACACCTTTATCCATACCTTCAGGTTCTGCTACACAAGTTGATGTTAC 72

Query 1499 CATATTGGGTAGTTTATTGCAATTGGACTTCCAAAATCCTAGGGTGTTTGGCCAAGACGT 1558
          ||||||||||| |||||||||||||||| ||
Sbjct 71 CATATTGGGTAGCTTATTGCAATTGGACTTCCAAAATCCTAGGGTATTCGGTCAAGACGT 12

Query 1559 TGGTATCTATG 1569
          ||||| ||
Sbjct 11 TGGTATTTATG 1
```

>SRR2298546.572666 572666 length=502  
Length=502

Score = 433 bits (234), Expect = 5e-117  
Identities = 246/252 (98%), Gaps = 0/252 (0%)  
Strand=Plus/Minus

```
Query 1257 TTGGTGGTGTATGAACCCAAACCTGTTGTGACATATGACTCAAAGTTAGAATTTGGAGCA 1316
|||||
Sbjct 252 TTGGTGGTGTATGAACCCAAACCTGTTGTGACATATGACTCAAAGTTAGAATTTGGAGCG 193

Query 1317 TTTACCAATTTACCACATGTATTGATGAATTTGGCTGAGACCACACAGGCTGATTTATGT 1376
|||||
Sbjct 192 TTTACCAATTTACCACATGTATTGATGAATTTGGCTGAGACCACACAGGCTGATTTATGT 133

Query 1377 ATCCCCTATGTTGCTGACACAAACTATGTTAAAACGGATTCGTCAGACTTAGGGCAACTA 1436
|||||
Sbjct 132 ATCCCCTATGTTGCTGACACAAACTATGTTAAAACAGATTCGTCAGACTTAGGGCAACTA 73

Query 1437 AAAGTCTATGTTTGGACACCTTTATCTATACCTTCAGGTTCTGCGACACAAGTTGATGTA 1496
|||||
Sbjct 72 AAAGTCTATGTTTGGACACCTTTATCCATACCTTCAGGTTCTGCTACACAAGTTGATGTT 13

Query 1497 ACCATATTGGGT 1508
|||||
Sbjct 12 ACCATATTGGGT 1
```

Score = 414 bits (224), Expect = 2e-111  
Identities = 242/251 (96%), Gaps = 0/251 (0%)  
Strand=Plus/Plus

```
Query 1196 ACGGTGTGGCTTTTCATTTTCAGGTGCAAGTGAATGTTAACCAAGGAACAGCTGGTAGTGC 1255
|||||
Sbjct 252 ACGGTGTGGCTTTTCATTTTCAGGTGCAAGTGAATGTTAATCAAGGAACAGCCGGTAGTGC 311

Query 1256 ATTGGTGGTGTATGAACCCAAACCTGTTGTGACATATGACTCAAAGTTAGAATTTGGAGC 1315
|||||
Sbjct 312 ATTGGTGGTGTATGAACCCAAACCTGTTGTGACATATGACTCAAAGTTAGAATTTGGAGC 371

Query 1316 ATTTACCAATTTACCACATGTATTGATGAATTTGGCTGAGACCACACAGGCTGATTTATG 1375
|||||
Sbjct 372 GTTTACCAATTTACCACATGTATTGATGAATTTGGCTGAGACCACACAGGCTGATTTATG 431

Query 1376 TATCCCCTATGTTGCTGACACAAACTATGTTAAAACGGATTCGTCAGACTTAGGGCAACT 1435
|||||
Sbjct 432 TATCCCCTATGTTGCTGACACAAACTATGTTAAAACAGATTCGTCAGACTTAGGGCAACT 491

Query 1436 AAAAGTCTATG 1446
|||||
Sbjct 492 AAAAGTCTATG 502
```

>SRR2298546.570152 570152 length=501  
Length=501

Score = 433 bits (234), Expect = 5e-117  
Identities = 246/252 (98%), Gaps = 0/252 (0%)  
Strand=Plus/Plus

```
Query 1256 ATTGGTGGTGTATGAACCCAAACCTGTTGTGACATATGACTCAAAGTTAGAATTTGGAGC 1315
|||||
```



```

Query 1378 TCCCCTATGTTGCTGACACAAACTATGTTAAAAACGGATTCGTCAGACTTAGGGCAACTAA 1437
          |||
Sbjct 382 TCCCCTATGTTGCTGACACAAACTATGTTAAAAACAGATTCGTCAGACTTAGGGCAACTAA 323

Query 1438 AAGTCTATGTTTGGACACCTTTATCTATAACCTTCAGGTTCTGCGACACAAGTTGATGTAA 1497
          |||
Sbjct 322 AAGTCTATGTTTGGACACCTTTATCCATACCTTCAGGTTCTGCTACACAAGTTGATGTAA 263

Query 1498 CCATATTGGGTA 1509
          |||
Sbjct 262 CCATATTGGGTA 251

```

Score = 422 bits (228), Expect = 1e-113  
Identities = 244/252 (97%), Gaps = 0/252 (0%)  
Strand=Plus/Plus

```

Query 1176 TCAAGATACTTTGCAGCAGTACGGTGTGGCTTTCATTTTCAGGTGCAAGTGAATGTTAAC 1235
          |||
Sbjct 1 TCAAGATACTTTGCAGCAGTACGGTGTGGTTTTTCATTTTCAAGTACAAGTGAATGTTAAT 60

Query 1236 CAAGGAACAGCTGGTAGTGCATTGGTGGTGTATGAACCCAAACCTGTTGTGACATATGAC 1295
          |||
Sbjct 61 CAAGGAACAGCCGGTAGTGCATTGGTGGTGTATGAACCCAAACCTGTTGTGACATATGAC 120

Query 1296 TCAAAGTTAGAATTTGGAGCATTTACCAATTTACCACATGTATTGATGAATTTGGCTGAG 1355
          |||
Sbjct 121 TCAAAGTTAGAATTTGGAGCGTTTACCAATTTACCACATGTGTTGATGAATTTGGCTGAG 180

Query 1356 ACCACACAGGCTGATTTATGTATCCCCTATGTTGCTGACACAAACTATGTTAAAAACGGAT 1415
          |||
Sbjct 181 ACCACACAGGCTGATTTATGTATCCCCTATGTTGCTGACACAAACTATGTTAAAAACAGAT 240

Query 1416 TCGTCAGACTTA 1427
          |||
Sbjct 241 TCGTCAGACTTA 252

```

>SRR2298546.362559 362559 length=502  
Length=502

Score = 433 bits (234), Expect = 5e-117  
Identities = 246/252 (98%), Gaps = 0/252 (0%)  
Strand=Plus/Plus

```

Query 1254 GCATTGGTGGTGTATGAACCCAAACCTGTTGTGACATATGACTCAAAGTTAGAATTTGGA 1313
          |||
Sbjct 251 GCATTGGTGGTGTATGAACCCAAACCTGTTGTGACATATGACTCAAAGTTAGAATTTGGA 310

Query 1314 GCATTTACCAATTTACCACATGTATTGATGAATTTGGCTGAGACCACAGGCTGATTTA 1373
          |||
Sbjct 311 GCGTTTACCAATTTACCACATGTGTTGATGAATTTGGCTGAGACCACAGGCTGATTTA 370

Query 1374 TGTATCCCCTATGTTGCTGACACAAACTATGTTAAAAACGGATTCGTCAGACTTAGGGCAA 1433
          |||
Sbjct 371 TGTATCCCCTATGTTGCTGACACAAACTATGTTAAAAACAGATTCGTCAGACTTAGGGCAA 430

Query 1434 CTAAAAGTCTATGTTTGGACACCTTTATCTATAACCTTCAGGTTCTGCGACACAAGTTGAT 1493
          |||

```

Sbjct 431 CTAAAAGTCTATGTTTGGACACCTTTATCCATACCTTCAGGTTCTGCTACACAAGTTGAT 490  
 Query 1494 GTAACCATATTG 1505  
 || |||||  
 Sbjct 491 GTTACCATATTG 502

Score = 401 bits (217), Expect = 2e-107  
 Identities = 239/250 (96%), Gaps = 0/250 (0%)  
 Strand=Plus/Minus

Query 1321 CCAATTTACCACATGTATTGATGAATTTGGCTGAGACCACACAGGCTGATTTATGTATCC 1380  
 |||||  
 Sbjct 251 CCAATTTACCACATGTATTGATGAATTTGGCTGAGACCACACAGGCTGATTTATGTATCC 192  
 Query 1381 CCTATGTTGCTGACACAAACTATGTTAAAACGGATTTCGTCAGACTTAGGGCAACTAAAAG 1440  
 |||||  
 Sbjct 191 CCTATGTTGCTGACACAAACTATGTTAAAACAGATTTCGTCAGACTTAGGGCAACTAAAAG 132  
 Query 1441 TCTATGTTTGGACACCTTTATCTATACCTTCAGGTTCTGCGACACAAGTTGATGTAACCA 1500  
 |||||  
 Sbjct 131 TCTATGTTTGGACACCTTTATCCATACCTTCAGGTTCTGCTACACAAGTTGATGTTACCA 72  
 Query 1501 TATTGGGTAGTTTATTGCAATTGGACTTCCAAAATCCTAGGGTGTGGCCAAGACGTTG 1560  
 |||||  
 Sbjct 71 TATTGGGTAGCTTATTGCAATTGGACTTCCAAAATCCTAGGGTATTTCGGTCAAGATGTTG 12  
 Query 1561 GTATCTATGA 1570  
 ||||  
 Sbjct 11 GTATTTATGA 2

>SRR2298546.103054 103054 length=502  
 Length=502

Score = 433 bits (234), Expect = 5e-117  
 Identities = 246/252 (98%), Gaps = 0/252 (0%)  
 Strand=Plus/Minus

Query 1225 TGAATGTTAACCAAGGAACAGCTGGTAGTGCATTGGTGGTGTATGAACCCAAACCTGTTG 1284  
 |||||  
 Sbjct 502 TGAATGTTAATCAAGGAACAGCCGGTAGTGCATTGGTGGTGTATGAACCCAAACCTGTTG 443  
 Query 1285 TGACATATGACTCAAAGTTAGAATTTGGAGCATTTACCAATTTACCACATGTATTGATGA 1344  
 |||||  
 Sbjct 442 TGACATATGACTCAAAGTTAGAATTTGGAGCGTTTACCAATTTACCACATGTGTTGATGA 383  
 Query 1345 ATTTGGCTGAGACCACACAGGCTGATTTATGTATCCCTATGTTGCTGACACAAACTATG 1404  
 |||||  
 Sbjct 382 ATTTGGCTGAGACCACACAGGCTGATTTATGTATCCCTATGTTGCTGACACAAACTATG 323  
 Query 1405 TTAAAACGGATTTCGTCAGACTTAGGGCAACTAAAAGTCTATGTTTGGACACCTTTATCTA 1464  
 |||||  
 Sbjct 322 TTAAAACAGATTTCGTCAGACTTAGGGCAACTAAAAGTCTATGTTTGGACACCTTTATCCA 263  
 Query 1465 TACCTTCAGGTT 1476  
 |||||  
 Sbjct 262 TACCTTCAGGTT 251



Score = 416 bits (225), Expect = 6e-112  
Identities = 241/249 (97%), Gaps = 0/249 (0%)  
Strand=Plus/Plus

```
Query 1191 GCAGTACGGTGTGGCTTTCATTTTCAGGTGCAAGTGAATGTTAACCAAGGAACAGCTGGT 1250
          |||
Sbjct 3 GCAGTACGGTGTGGTTCATTTTCAGGTGCAAGTGAATGTTAACCAAGGAACAGCCGGT 62

Query 1251 AGTGCATTGGTGGTGTATGAACCCAAACCTGTTGTGACATATGACTCAAAGTTAGAATTT 1310
          |||
Sbjct 63 AGTGCATTGGTGGTGTATGAACCCAAACCTGTTGTGACATATGACTCAAAGTTAGAATTT 122

Query 1311 GGAGCATTACCAATTTACCACATGTATTGATGAATTTGGCTGAGACCACACAGGCTGAT 1370
          |||
Sbjct 123 GGAGCGTTTACCAATTTACCACATGTATTGATGAATTTGGCTGAGACCACACAGGCTGAT 182

Query 1371 TTATGTATCCCCTATGTTGCTGACACAAACTATGTTAAAAACGGATTCGTCAGACTTAGGG 1430
          |||
Sbjct 183 TTATGTATCCCCTATGTTGCTGACACAAACTATGTTAAAAACAGATTCGTCAGACTTAGGG 242

Query 1431 CAACTAAAA 1439
          |||
Sbjct 243 CAACTAAAA 251
```

>SRR2298578.1030338 1030338 length=500  
Length=500

Score = 431 bits (233), Expect = 2e-116  
Identities = 247/254 (97%), Gaps = 0/254 (0%)  
Strand=Plus/Plus

```
Query 349 GGTGACGTGTGGGAACCTTATTGGAAGCAACATTTTGCTGCAAAGCATCCTATTGCCAGCG 408
          |||
Sbjct 1 GGTGACGTGTGGGAACCTTATTGGAACAACATTTTGCTGTAAAGCATCCTATTGCCAGCG 60

Query 409 GAACAACACCTGGTAACAGGTGCCTCTGGGGCCAAAAGCCAAGGTCTAACAAAACCTTTA 468
          |||
Sbjct 61 GAACAACACCTGGTAACAGGTGCCTCTGGGGCCAAAAGCCAAGGTCTAACAAAACCTTTA 120

Query 469 GGATTGGTTCTAAACCTGAGATGTTGTGGAAGATACTTAGTACCTGCCGATCTGGTAGTA 528
          |||
Sbjct 121 GGATTGGTTCTAAACCTGAGATGTTGTAGAAAGATACTTAGTACCTACCGATCTGGTAGTA 180

Query 529 CTGCAAAACACTAGTTGTAAGGCCACGAAAGGATGCCAGAAAGGTACCCATAGGTAACAAG 588
          |||
Sbjct 181 GTGCAAAACACTAGTTGTAAGGCCACGAAAGGATGCCAGAAAGGTACCCATAGGTAACAAG 240

Query 589 TGACACTATGGATC 602
          |||
Sbjct 241 CGACACTATGGATC 254
```

Score = 399 bits (216), Expect = 6e-107  
Identities = 234/243 (96%), Gaps = 0/243 (0%)  
Strand=Plus/Minus

```
Query 360 GGAACCTATTGGAAGCAACATTTTGCTGCAAAGCATCCTATTGCCAGCGGAACAACACCT 419
```

```

Sbjct 493  |||||  GGAACCTTAGTGGAACAACATTTTGGTGTAAAGCATCCTATTGCCAGCGGAACAACACCT 434
Query 420  GGTAACAGGTGCCTCTGGGGCCAAAAGCCAAGGTCTAACAAACCCTTTAGGATTGGTTCT 479
Sbjct 433  |||||  GGTAACAGGTGCCTCTGGGGCCAAAAGCCAAGGTTAACAAACCCTTTAGGATTGGTTCT 374
Query 480  AAACCTGAGATGTTGTGGAAGATACTTAGTACCTGCCGATCTGGTAGTACTGCAAACACT 539
Sbjct 373  |||||  AAACCTGAGATGTTGTAGAAGATACTTAGTACCTACCGATCTGGTAGTAGTGCAAACACT 314
Query 540  AGTTGTAAGGCCACGAAGGATGCCAGAAAGGTACCCATAGGTAACAAGTGACACTATGG 599
Sbjct 313  |||||  AGTTGTAAGGCCACGAAGGATGCCAGAAAGGTACCCATAGGTAACAAGCGACACTATGG 254
Query 600  ATC 602
Sbjct 253  |||  ATC 251

```

>SRR2298578.535032 535032 length=500  
Length=500

Score = 431 bits (233), Expect = 2e-116  
Identities = 245/251 (98%), Gaps = 0/251 (0%)  
Strand=Plus/Minus

```

Query 1258  TGGTGGTGTATGAACCCAAACCTGTTGTGACATATGACTCAAAGTTAGAATTTGGAGCAT 1317
Sbjct 251  |||||  TGGTGGTGTATGAACCCAAACCCGTTGTGACATATGACTCAAAGTTAGAATTTGGAGCAT 192
Query 1318  TTACCAATTTACCACATGTATTGATGAATTTGGCTGAGACCACACAGGCTGATTTATGTA 1377
Sbjct 191  |||||  TTACCAATCTACCACATGTGTTGATGAATTTGGCTGAGACCACACAGGCTGATTTATGTA 132
Query 1378  TCCCCTATGTTGCTGACACAAACTATGTTAAAACGGATTCGTCAGACTTAGGGCAACTAA 1437
Sbjct 131  |||||  TCCCCTATGTTGCTGACACAAACTATGTTAAAACAGATTCGTCAGACTTAGGGCAACTAA 72
Query 1438  AAGTCTATGTTTGGACACCTTTATCTATAACCTTCAGGTTCTGCGACACAAGTTGATGTAA 1497
Sbjct 71  |||||  AAGTCTATGTTTGGACACCTTTATCCATAACCTTCAGGTTCTGCTACACAAGTTGATGTAA 12
Query 1498  CCATATTGGGT 1508
Sbjct 11  |||||  CCATATTGGGT 1

```

Score = 388 bits (210), Expect = 1e-103  
Identities = 239/253 (94%), Gaps = 1/253 (0%)  
Strand=Plus/Plus

```

Query 1234  ACCAAGGAACAGCTGGTAGTGCATTGGTGGTGTATGAACCCAAACCTGTTGTGACATATG 1293
Sbjct 248  |||||  ACC-AGGAACAGCTGGTAGTGCATTGGTGGTGTATGAACCCAAACCCGTTGTGACATATG 306
Query 1294  ACTCAAAGTTAGAATTTGGAGCATTTACCAATTTACCACATGTATTGATGAATTTGGCTG 1353
Sbjct 307  |||||  ACTCAAAGTTAGAATTTGGAGCATTTACCAATCTACCACATGTGTTGATGAATTTGGCTG 366

```





>SRR2298573.781063 781063 length=500  
Length=500

Score = 431 bits (233), Expect = 2e-116  
Identities = 245/251 (98%), Gaps = 0/251 (0%)  
Strand=Plus/Plus

```
Query 461 ACCCTTTAGGATTGGTTCTAAACCTGAGATGTTGTGGAAGATACTTAGTACCTGCCGATC 520
          |||
Sbjct 250 ACCCTTTAGGATTGGTTCTAAACCTGAGATGTTGTGGAAGATACTTAGTACCTACCGATC 309

Query 521 TGGTAGTACTGCAAACACTAGTTGTAAGGCCACGAAGGATGCCCAGAAGGTACCCATAG 580
          |||
Sbjct 310 TGGTAGTAGTGCAAACACTAGTTGTAAGGCCACGAAGGATGCCCAGAAGGTACCCATAG 369

Query 581 GTAACAAGTGACACTATGGATCTGATCTGGGGCCAGGTACCTCTATCTTGGTGACCTGGT 640
          |||
Sbjct 370 GTAACAAGCGACACTATGGATCTGATCTGGGGCCAGGTACCTCTATCTTGGTGATCTGGT 429

Query 641 TAAAAAGCGTCTAGTGGGCCAAACCCgggggggATCCCCGGTTTCCTTTATTTTATCAA 700
          |||
Sbjct 430 TAAAAACGTCTAGTGGGCCAAACCCGGGGGGGATCCCCGGTTTCCTTTATTTTATCAA 489

Query 701 TGCTACAATGG 711
          |||
Sbjct 490 TGCCACAATGG 500
```

Score = 411 bits (222), Expect = 3e-110  
Identities = 240/249 (96%), Gaps = 0/249 (0%)  
Strand=Plus/Minus

```
Query 473 TGGTTCTAAACCTGAGATGTTGTGGAAGATACTTAGTACCTGCCGATCTGGTAGTACTGC 532
          |||
Sbjct 250 TGGTTCTAAACCTGAGGTGTTGTGGAAGATTCTTAGTACCTTCCGATCTGGTAGTAGTGC 191

Query 533 AAACACTAGTTGTAAGGCCACGAAGGATGCCCAGAAGGTACCCATAGGTAACAAGTGAC 592
          |||
Sbjct 190 AAACACTAGTTGTAAGGCCACGAAGGATGCCCAGAAGGTACCCATAGGTAACAAGCGAC 131

Query 593 ACTATGGATCTGATCTGGGGCCAGGTACCTCTATCTTGGTGACCTGGTTAAAAAGCGTCT 652
          |||
Sbjct 130 ACTATGGATCTGATCTGGGGCCAGGTACCTCTATCTTGGTGATCTGGTTAAAAAACGTCT 71

Query 653 AGTGGGCCAAACCCgggggggATCCCCGGTTTCCTTTATTTTATCAATGCTACAATGGA 712
          |||
Sbjct 70 AGTGGGCCAAACCCGGGGGGGATCCCCGGTTTCCTTTATTTTATCAATGCCACTATGGA 11

Query 713 GACAATTAA 721
          |||
Sbjct 10 GACAATTAA 2
```

>SRR2298573.780853 780853 length=500  
Length=500

Score = 431 bits (233), Expect = 2e-116

Identities = 245/251 (98%), Gaps = 0/251 (0%)  
Strand=Plus/Minus

```
Query 443 AAAGCCAAGGTCTAACAAACCCTTTAGGATTGGTTCTAAACCTGAGATGTTGTGGAAGAT 502
          |||
Sbjct 251 AAAGCCAAGGTTTAAACAAACCCTTTAGGATTGGTTCTAAACCTGAGATGTTGTGGAAGAT 192

Query 503 ACTTAGTACCTGCCGATCTGGTAGTACTGCAAACACTAGTTGTAAGGCCACGAAGGATG 562
          |||
Sbjct 191 ACTTAGTACCTACCGATCTGGTAGTAGTGCAAACACTAGTTGTAAGGCCACGAAGGATG 132

Query 563 CCCAGAAGGTACCCATAGGTAACAAGTGACACTATGGATCTGATCTGGGGCCAGGTACCT 622
          |||
Sbjct 131 CCCAGAAGGTACCCATAGGTAACAAGCGACACTATGGATCTGATCTGGGGCCAGGTACCT 72

Query 623 CTATCTTGGTGACCTGGTTAAAAAGCGTCTAGTGGGCCAAACCCgggggggATCCCCGGT 682
          |||
Sbjct 71 CTATCTTGGTGATCTGGTTAAAAAACGTCTAGTGGGCCAAACCCGGGGGGGATCCCCGGT 12

Query 683 TTCCTTTTATT 693
          |||
Sbjct 11 TTCCTTTTATT 1
```

Score = 424 bits (229), Expect = 3e-114  
Identities = 243/250 (97%), Gaps = 0/250 (0%)  
Strand=Plus/Plus

```
Query 422 TAACAGGTGCCCTCTGGGGCCAAAAGCCAAGGTCTAACAAACCCTTTAGGATTGGTTCTAA 481
          |||
Sbjct 251 TAACAGGTGCCCTCTGGGGCCAAAAGCCAAGGTTTAAACAAACCCTTTAGGATTGGTTCTAA 310

Query 482 ACCTGAGATGTTGTGGAAGATACTTAGTACCTGCCGATCTGGTAGTACTGCAAACACTAG 541
          |||
Sbjct 311 ACCTGAGATGTTGTGGAAGATACTTAGTACCTACCGATCTGGTAGTAGTGCAAACACTAG 370

Query 542 TTGTAAGGCCACGAAGGATGCCCAGAAGGTACCCATAGGTAACAAGTGACACTATGGAT 601
          |||
Sbjct 371 TTGTAAGGCCACGAAGGATGCCCAGAAGGTACCCATAGGTAACAAGCGACACTATGGAT 430

Query 602 CTGATCTGGGGCCAGGTACCTCTATCTTGGTGACCTGGTTAAAAAGCGTCTAGTGGGCCA 661
          |||
Sbjct 431 CTGATCTGGGGCCAGGTACCTCTATCTTGGGGATCTGGTTAAAAAACGTCTAGTGGGCCA 490

Query 662 AACCCggggg 671
          |||
Sbjct 491 AACCCGGGGG 500
```

>SRR2298573.769703 769703 length=500  
Length=500

Score = 431 bits (233), Expect = 2e-116  
Identities = 254/264 (96%), Gaps = 1/264 (0%)  
Strand=Plus/Minus

```
Query 327 CTAGTAAGTTTGTGAGACGTCTGGTGACGTGTGGGAACCTTATTGGAAGCAACATTTTGCT 386
          |||
Sbjct 499 CTAGTAAGTTTGTGAGACGTCTGGTGACGTTTGGGAACCTTATTGGAACAACATTTTGCT 440
```



Sbjct 378 | TAACAAACCCCTTTAGGATTGGTTCTAAACCTGAGATGTTGTGGAAGATACTTAGTACCTA 319  
Query 515 CCGATCTGGTAGTACTGCAAACACTAGTTGTAAGGCCACGAAGGATGCCCAGAAGGTAC 574  
|  
Sbjct 318 CCGATCTGGTAGTAGTGCAAACACTAGTTGTAAGGCCACGAAGGATGCCCAGAAGGTAC 259  
Query 575 CCATAGGT 582  
|  
Sbjct 258 CCATAGGT 251

Score = 412 bits (223), Expect = 7e-111  
Identities = 242/251 (96%), Gaps = 1/251 (0%)  
Strand=Plus/Plus

Query 334 GTTTGTGAGACGTCTGGTGACGTGTGGGAACCTTATTGGAAGCAACATTTTGCTGCAAAGC 393  
|  
Sbjct 11 GTTTGTGAGACGTCTGGTGACGTGTGGGAACCTTATTGGAACAACATTTTGCTGTAAAGC 70  
Query 394 ATCCTATTGCCAGCGGAACAACACCTGGTAACAGGTGCCTCTGGGGCCAAAAGCCAAGGT 453  
|  
Sbjct 71 ATCCTATTGCCAGCGGAACAACACCTGGTAACAGGTGCCTCTGGGGCCAAAAGCCAAGGT 130  
Query 454 CTAACAAACCCCTTTAGGATTGGTTCTAAACCTGAGATGTTGTGGAAGATACTTAGTACCT 513  
|  
Sbjct 131 TTAACAAACCCCTTTAGGATTGGTTCTAAACCTGAGATGTTGTGGAAGATACTTAGTACCT 190  
Query 514 GCCGATCTGGTAGTACTGCAAACACTAGTTGTAAGGCCACGAAGGATGCCCAGAAGGTA 573  
|  
Sbjct 191 ACCGATCTGGTAGTAGTGCAAACACTAGTTGTAAGGCCACGAAGGATGCCCAGAAGGGA 250  
Query 574 CCC-ATAGGTA 583  
| | | | |  
Sbjct 251 ACCTATGGGTA 261

>SRR2298573.740334 740334 length=500  
Length=500

Score = 431 bits (233), Expect = 2e-116  
Identities = 245/251 (98%), Gaps = 0/251 (0%)  
Strand=Plus/Minus

Query 396 CCTATTGCCAGCGGAACAACACCTGGTAACAGGTGCCTCTGGGGCCAAAAGCCAAGGTCT 455  
|  
Sbjct 251 CCTATTGCCAGCGGAACAACCCCTGGTAACAGGTGCCTCTGGGGCCAAAAGCCAAGGTTT 192  
Query 456 AACAAACCCCTTTAGGATTGGTTCTAAACCTGAGATGTTGTGGAAGATACTTAGTACCTGC 515  
|  
Sbjct 191 AACAAACCCCTTTAGGATTGGTTCTAAACCTGAGATGTTGTGGAAGATACTTAGTACCTAC 132  
Query 516 CGATCTGGTAGTACTGCAAACACTAGTTGTAAGGCCACGAAGGATGCCCAGAAGGTACC 575  
|  
Sbjct 131 CGATCTGGTAGTAGTGCAAACACTAGTTGTAAGGCCACGAAGGATGCCCAGAAGGTACC 72  
Query 576 CATAGGTAACAAGTGACACTATGGATCTGATCTGGGGCCAGGTACCTCTATCTTGGTGAC 635  
|  
Sbjct 71 CATAGGTAACAAGCGACACTATGGATCTGATCTGGGGCCAGGTACCTCTATCTTGGTGAT 12







```

Sbjct 439 AGACGTCTGGTGACGTGTGGGAACTTATTGGAAACAACATTTTGCTGTAAAGCATCCTAT 380
Query 401 TGCCAGCGGAACAACACCTGGTAACAGGTGCCTCTGGGGCCAAAAGCCAAGGTCTAACAA 460
      |||
Sbjct 379 TGCCAGCGGAACAACACCTGGTAACAGGTGCCTCTGGGGACAAAAGCCAAGGTTTAACAA 320
Query 461 ACCCTTTAGGATTGGTTCTAAACCTGAGATGTTGTGGAAGATACTTAGTACCTGCCGATC 520
      |||
Sbjct 319 ACCCTTTAGGATTGGTTCTAAACCTGAGATGTTGTGGAAGATACTTAGTACCTACCGATC 260
Query 521 TGGTAGTA 528
      |||
Sbjct 259 TGGTAGTA 252

```

>SRR2298573.647887 647887 length=500  
Length=500

Score = 431 bits (233), Expect = 2e-116  
Identities = 247/254 (97%), Gaps = 0/254 (0%)  
Strand=Plus/Plus

```

Query 433 TCTGGGGCCAAAAGCCAAGGTCTAACAAACCTTTAGGATTGGTTCTAAACCTGAGATGT 492
      |||
Sbjct 1 TCTGGGGCCAAAAGCCAAGGTTTAAACAAACCTTTAGGATTGGTTCTAAACCTGAGATGT 60
Query 493 TGTGGAAGATACTTAGTACCTGCCGATCTGGTAGTACTGCAAACACTAGTTGTAAGGCC 552
      |||
Sbjct 61 TGTGGAAGATACTTAGTACCTACCGATCTGGTAGTAGTGCAAACACTAGTTGTAAGGCC 120
Query 553 ACGAAGGATGCCCAGAAGGTACCCATAGGTAACAAGTGACACTATGGATCTGATCTGGGG 612
      |||
Sbjct 121 ACGAAGGATGCCCAGAAGGTACCCATAGGTAACAAGCGACACTATGGATCTGATCTGGGG 180
Query 613 CCAGGTACCTCTATCTTGGTGACCTGGTTAAAAAAGCGTCTAGTGGGCCAAAACCCgggggg 672
      |||
Sbjct 181 CCAGGTACCTCTATCTTGGTGAACCTGGTTAAAAAACGTCTAGTGGGCCAAAACCCGGGGGG 240
Query 673 gATCCCCGGTTTCC 686
      |||
Sbjct 241 GATCCCCGGTCTCC 254

```

Score = 383 bits (207), Expect = 6e-102  
Identities = 235/249 (94%), Gaps = 0/249 (0%)  
Strand=Plus/Minus

```

Query 499 AGATACTTAGTACCTGCCGATCTGGTAGTACTGCAAACACTAGTTGTAAGGCCACGGAAG 558
      |||
Sbjct 499 AGATACTTAGTTCCCTACCGTCTGGTAGTAGGGCAAACCTAGTTTAAAGGCCACGGAAG 440
Query 559 GATGCCCAGAAGGTACCCATAGGTAACAAGTGACACTATGGATCTGATCTGGGGCCAGGT 618
      |||
Sbjct 439 GATGCCCAGAAGGTACCCATAGGTAACAAGCGACACTAGGGATCTGATCTGGGGCCAGGT 380
Query 619 ACCTCTATCTTGGTGACCTGGTTAAAAAAGCGTCTAGTGGGCCAAAACCCgggggggATCCC 678
      |||
Sbjct 379 ACCTCTATCTTGGTGATCTGGTTAAAAAACGTCTAGTGGGCCAAAACCCGGGGGGGATCCC 320

```

```

Query 679 CGGTTTCCTTTTATTTTATCAATGCTACAATGGAGACAATTAAAAAGTATTGCAGATATGG 738
          |||
Sbjct 319 CGGTTTCCTTTTATTTTATCAATGCCACTATGGAGACAATTAAAGAGTATTGCAGATATGG 260

Query 739 CGACCGGAG 747
          |||
Sbjct 259 CGACCGGAG 251

```

>SRR2298573.588383 588383 length=500  
Length=500

Score = 431 bits (233), Expect = 2e-116  
Identities = 245/251 (98%), Gaps = 0/251 (0%)  
Strand=Plus/Minus

```

Query 430 GCCTCTGGGGCCAAAAGCCAAGGTCTAACAAACCCCTTTAGGATTGGTTCTAAACCTGAGA 489
          |||
Sbjct 251 GCCTCTGGGGCCAAAAGCCAAGGTCTAACAAACCCCTTTAGGATTGGTTCTAAACCTGAGA 192

Query 490 TGTTGTGGAAGATACTTAGTACCTGCCGATCTGGTAGTACTGCAAACACTAGTTGTAAGG 549
          |||
Sbjct 191 TGTTGTGGAAGATACTTAGTACCTACCGATCTGGTAGTACTGCAAACACTAGTTGTAAGG 132

Query 550 CCCACGAAGGATGCCCAGAAGGTACCCATAGGTAACAAGTGACACTATGGATCTGATCTG 609
          |||
Sbjct 131 CCCACGAAGGATGCCCAGAAGGTACCCATAGGTAACAAGCGACACTATGGATCTGATCTG 72

Query 610 GGGCCAGGTACCTCTATCTTGGTGACCTGGTTAAAAAGCGTCTAGTGGGGCCAAAACCCggg 669
          |||
Sbjct 71 GGGCCAGGTACCTCTATCTTGGTGATCTGGTTAAAAAACGTCTAGTGGGGCCAAAACCCGGG 12

Query 670 ggggATCCCCG 680
          |||
Sbjct 11 GGGGATCCCCG 1

```

Score = 390 bits (211), Expect = 3e-104  
Identities = 237/250 (95%), Gaps = 0/250 (0%)  
Strand=Plus/Plus

```

Query 364 CTTATTGGAAGCAACATTTTGCTGCAAAGCATCCTATTGCCAGCGGAACAACACCTGGTA 423
          |||
Sbjct 251 CTTATTGGAACAACATTTTGCTGTAAAGCATCCTATTGCCAGCGGAACAACACCTGGTA 310

Query 424 ACAGGTGCCCTCTGGGGCCAAAAGCCAAGGTCTAACAAACCCCTTTAGGATTGGTTCTAAAC 483
          |||
Sbjct 311 ACAGGTGCCCTCTGGGGCCAAAAGCCAAGGTCTAACAAACCCCTTTAGGATTGGTTCTAAAC 370

Query 484 CTGAGATGTTGTGGAAGATACTTAGTACCTGCCGATCTGGTAGTACTGCAAACACTAGTT 543
          |||
Sbjct 371 CTGAGATGTTGTGGAAGATACTTAGTACCTACCGATCTGGTAGTACTGCAAACACTAGTT 430

Query 544 GTAAGGCCACGAAGGATGCCCAGAAGGTACCCATAGGTAACAAGTGACACTATGGATCT 603
          |||
Sbjct 431 GTAAGGCCACGAAGGATGCCCAGAAGGAACCAAAAAGGAAAAAAACGACACAATGGATCT 490

Query 604 GATCTGGGGC 613
          |||

```

Sbjct 491 GATCTGGGGC 500

>SRR2298573.550702 550702 length=500  
Length=500

Score = 431 bits (233), Expect = 2e-116  
Identities = 245/251 (98%), Gaps = 0/251 (0%)  
Strand=Plus/Minus

```
Query 338 GTGAGACGTCTGGTGACGTGTGGGAACTTATTGGAAGCAACATTTTGCTGCAAAGCATCC 397
          |||
Sbjct 251 GTGAGACGTCTGGTGACGTGTGGGAACTTATTGGAACAACATTTTGCTGTAAAGCATCC 192

Query 398 TATTGCCAGCGGAACAACACCTGGTAACAGGTGCCTCTGGGGCCAAAAGCCAAGGTCTAA 457
          |||
Sbjct 191 TATTGCCAGCGGAACAACCGCTGGTAACAGGTGCCTCTGGGGCCAAAAGCCAAGGTTTAA 132

Query 458 CAAACCCCTTTAGGATTGGTTCTAAACCTGAGATGTTGTGGAAGATACTTAGTACCTGCCG 517
          |||
Sbjct 131 CAAACCCCTTTAGGATTGGTTCTAAACCTGAGATGTTGTGGAAGATACTTAGTACCTACCG 72

Query 518 ATCTGGTAGTACTGCAAACACTAGTTGTAAGGCCACGAAGGATGCCCAGAAGGTACCCA 577
          |||
Sbjct 71 ATCTGGTAGTACTGCAAACACTAGTTGTAAGGCCACGAAGGATGCCCAGAAGGTACCCA 12

Query 578 TAGGTAACAAG 588
          |||
Sbjct 11 TAGGTAACAAG 1
```

Score = 370 bits (200), Expect = 4e-98  
Identities = 224/236 (95%), Gaps = 0/236 (0%)  
Strand=Plus/Plus

```
Query 336 TTGTGAGACGTCTGGTGACGTGTGGGAACTTATTGGAAGCAACATTTTGCTGCAAAGCAT 395
          |||
Sbjct 260 TTGTGAGACGTCTGGTGACGTGTGGGAACTTATTGGAACAACATTTTGCTGTAAAGCAT 319

Query 396 CCTATTGCCAGCGGAACAACACCTGGTAACAGGTGCCTCTGGGGCCAAAAGCCAAGGTCT 455
          |||
Sbjct 320 CCTATTGCCAGCGGAACAACACCTGGTAACAGGTGCCTCTGGGGCCAAAAGCCAAGGTTT 379

Query 456 AACAAACCCCTTTAGGATTGGTTCTAAACCTGAGATGTTGTGGAAGATACTTAGTACCTGC 515
          |||
Sbjct 380 AACAAACCCCTTTAGGATTGGTTCTAAACCTGAGATGTTGTGGAAGAACTTCGAACCTAC 439

Query 516 CGATCTGGTAGTACTGCAAACACTAGTTGTAAGGCCACGAAGGATGCCCAGAAGG 571
          |||
Sbjct 440 CGATCTGGTAGCAGTGCAAACACAGGTGGTAAGGCCACGAAGGATGCCCAGAAGG 495
```

>SRR2298573.529564 529564 length=500  
Length=500

Score = 431 bits (233), Expect = 2e-116  
Identities = 245/251 (98%), Gaps = 0/251 (0%)  
Strand=Plus/Minus

```

Query 357 GTGGGAACTTATTGGGAAGCAACATTTTGTCTGCAAAGCATCCTATTGCCAGCGGAACAACA 416
          |||
Sbjct 251 GTGGGAACTTATTGGAAAACAACATTTTGTCTGTAAAAGCATCCTATTGCCAGCGGAACAACA 192

Query 417 CCTGGTAACAGGTGCCTCTGGGGCCAAAAGCCAAGGTCTAACAAACCCTTTAGGATTGGT 476
          |||
Sbjct 191 CCTGGTAACAGGTGCCTCTGGGGCCAAAAGCCAAGGTTTAAACAAACCCTTTAGGATTGGT 132

Query 477 TCTAAACCTGAGATGTTGTGGAAGATACTTAGTACCTGCCGATCTGGTAGTACTGCAAAC 536
          |||
Sbjct 131 TCTAAACCTGAGATGTTGTGGAAGATACTTAGTACCTACCGATCTGGTAGTACTGCAAAC 72

Query 537 ACTAGTTGTAAGGCCACGAAGGATGCCCAGAAGGTACCCATAGGTAACAAGTGACACTA 596
          |||
Sbjct 71 ACTAGTTGTAAGGCCACGAAGGATGCCCAGAAGGTACCCATAGGTAACAAGCGACACTA 12

Query 597 TGGATCTGATC 607
          |||
Sbjct 11 TGGATCTGATC 1

```

Score = 409 bits (221), Expect = 9e-110  
Identities = 241/251 (96%), Gaps = 0/251 (0%)  
Strand=Plus/Plus

```

Query 303 ACCTTATGCTCACACAGCCATCCTCTAGTAAGTTTGTGAGACGCTGGTGACGTGTGGGA 362
          |||
Sbjct 250 ACCTTATGCTCACACAGCCATCCTCTAGTAAGTTTGTGAGACGCTGGTGACGTGTGGGA 309

Query 363 ACTTATTGGGAAGCAACATTTTGTCTGCAAAGCATCCTATTGCCAGCGGAACAACACCTGGT 422
          |||
Sbjct 310 ACTTATTGGAAAACAACATTTTGTCTGTAAAAGCATCCTATTGCCAGCGGAACAACACCTGGT 369

Query 423 AACAGGTGCCTCTGGGGCCAAAAGCCAAGGTCTAACAAACCCTTTAGGATTGGTTCTAAA 482
          |||
Sbjct 370 AACAGGTGCCTCTGGGGCCAAAAGCCAAGGTTTAAACAAACCCTTTAGGATTGGTTCTAAA 429

Query 483 CCTGAGATGTTGTGGAAGATACTTAGTACCTGCCGATCTGGTAGTACTGCAAACACTAGT 542
          |||
Sbjct 430 CCTGAGATGTTGGGGAAGATACTTAGTACCTACCGATCTGGTAGTAGGGCAAACAACAGG 489

Query 543 TGTAAGGCCCA 553
          |||
Sbjct 490 TGTAAGGCCCA 500

```

>SRR2298573.498005 498005 length=500  
Length=500

Score = 431 bits (233), Expect = 2e-116  
Identities = 245/251 (98%), Gaps = 0/251 (0%)  
Strand=Plus/Minus

```

Query 357 GTGGGAACTTATTGGGAAGCAACATTTTGTCTGCAAAGCATCCTATTGCCAGCGGAACAACA 416
          |||
Sbjct 251 GTGGGAACTTATTGGAAAACAACATTTTGTCTGTAAAAGCATCCTATTGCCAGCGGAACAACA 192

Query 417 CCTGGTAACAGGTGCCTCTGGGGCCAAAAGCCAAGGTCTAACAAACCCTTTAGGATTGGT 476
          |||

```

```

Sbjct 191 CCTGGTAACAGGTGCCTCTGGGGCCAAAAGCCAAGGTTTAAACAAACCCTTTAGGATTGGT 132
Query 477 TCTAAACCTGAGATGTTGTGGAAGATACTTAGTACCTGCCGATCTGGTAGTACTGCAAAC 536
      |||
Sbjct 131 TCTAAACCTGAGATGTTGTGGAAGATACTTAGTACCTACCGATCTGGTAGTAGTGCAAAC 72
Query 537 ACTAGTTGTAAGGCCACGAAGGATGCCCAGAAGGTACCCATAGGTAACAAGTGACACTA 596
      |||
Sbjct 71 ACTAGTTGTAAGGCCACGAAGGATGCCCAGAAGGTACCCATAGGTAACAAGCGACACTA 12
Query 597 TGGATCTGATC 607
      |||
Sbjct 11 TGGATCTGATC 1

```

Score = 379 bits (205), Expect = 7e-101  
Identities = 231/244 (95%), Gaps = 0/244 (0%)  
Strand=Plus/Plus

```

Query 332 AAGTTTGTGAGACGTCTGGTGACGTGTGGGAACCTTATTGGAAGCAACATTTTGCTGCAAA 391
      |||
Sbjct 257 AAGTTTGTGAGACGTCTGGCGACGTGTGGGAACCTTATTGGAACAACATTTTGCTGTAAA 316
Query 392 GCATCCTATTGCCAGCGGAACAACACCTGGTAACAGGTGCCTCTGGGGCCAAAAGCCAAG 451
      |||
Sbjct 317 GCATCCTATTGCCAGCGGAACAACACCTGGTAACAGGTGCCTCTGGGGCCAAAAGCCAAG 376
Query 452 GTCTAACAAACCCTTTAGGATTGGTTCTAAACCTGAGATGTTGTGGAAGATACTTAGTAC 511
      |||
Sbjct 377 GTTTAACAAACCCTTTAGGATTGGTTCTAAACCTGAGATGTTGTGGAAGATACTTAGTAC 436
Query 512 CTGCCGATCTGGTAGTACTGCAAACACTAGTTGTAAGGCCACGAAGGATGCCCAGAAGG 571
      |||
Sbjct 437 CTACCGATCTGGTAGTAGGGCAAAAACCTAGTTGAAAGGCCCCCGAAGGAGGCCAAAAGG 496
Query 572 TACC 575
      |||
Sbjct 497 AACC 500

```

>SRR2298573.468266 468266 length=500  
Length=500

Score = 431 bits (233), Expect = 2e-116  
Identities = 243/248 (98%), Gaps = 0/248 (0%)  
Strand=Plus/Plus

```

Query 456 AACAAACCCTTTAGGATTGGTTCTAAACCTGAGATGTTGTGGAAGATACTTAGTACCTGC 515
      |||
Sbjct 251 AACAAACCCTTTAGGATTGGTTCTAAACCTGAGATGTTGTGGAAGATACTTAGTACCTAC 310
Query 516 CGATCTGGTAGTACTGCAAACACTAGTTGTAAGGCCACGAAGGATGCCCAGAAGGTACC 575
      |||
Sbjct 311 CGATCTGGTAGTACTGCAAACACTAGTTGTAAGGCCACGAAGGATGCCCAGAAGGTACC 370
Query 576 CATAGGTAACAAGTGACACTATGGATCTGATCTGGGGCCAGGTACCTCTATCTTGGTGAC 635
      |||
Sbjct 371 CATAGGTAACAAGCGACACTATGGATCTGATCTGGGGCCAGGTACCTCTATCTTGGTGAT 430

```

Query 636 CTGGTTAAAAAGCGTCTAGTGGGCCAAAACCCgggggggATCCCCGGTTTCCTTTTATTTT 695  
 |||  
 Sbjct 431 CTGGTTAAAAAACGTCTAGTGGGCCAAAACCCGGGGGGGATCCCCGGTTTCCTTTTATTTT 490

Query 696 ATCAATGC 703  
 |||  
 Sbjct 491 ATCAATGC 498

Score = 414 bits (224), Expect = 2e-111  
 Identities = 240/248 (97%), Gaps = 0/248 (0%)  
 Strand=Plus/Minus

Query 515 CCGATCTGGTAGTACTGCAAACACTAGTTGTAAGGCCACGAAGGATGCCAGAAGGTAC 574  
 |||  
 Sbjct 248 CCGATCTGGTAGTACTGCAAACACTTGTGTAAGGCCACGAAGGATGCCAGAAGGTAC 189

Query 575 CCATAGGTAACAAGTGACACTATGGATCTGATCTGGGGCCAGGTACCTCTATCTTGGTGA 634  
 |||  
 Sbjct 188 CCATAGGTAACAAGCGCACACTATGGATCTGATCTGGGGCCAGGTACCTCTATCTTGGTGA 129

Query 635 CCTGGTTAAAAAGCGTCTAGTGGGCCAAAACCCgggggggATCCCCGGTTTCCTTTTATTT 694  
 |||  
 Sbjct 128 TCTGGTTAAAAAACGTCTAGTGGGCCAAAACCCGGGGGGGATCCCCGGTTTCCTTTTATTT 69

Query 695 TATCAATGCTACAATGGAGACAATTAAGATATTGCAGATATGGCGACCGGAGTGGTCAG 754  
 |||  
 Sbjct 68 TATCAATGCCACTATGGAGACAATTAAGAGTATTGCAGATATGGCGACCGGAGTGGTCAG 9

Query 755 TTCAGTTG 762  
 |||  
 Sbjct 8 TTCAGTTG 1

>SRR2298573.423667 423667 length=500  
 Length=500

Score = 431 bits (233), Expect = 2e-116  
 Identities = 245/251 (98%), Gaps = 0/251 (0%)  
 Strand=Plus/Plus

Query 377 ACATTTTGCTGCAAAGCATCCTATTGCCAGCGGAACAACACCTGGTAACAGGTGCCTCTG 436  
 |||  
 Sbjct 1 ACATTTTGCTGTAAAGCATCCTATTGCCAGCGGAACAACACCTGGTAACAGGTGCCTCTG 60

Query 437 GGGCCAAAAGCCAAGGTCTAACAAAACCTTTAGGATTGGTTCTAAACCTGAGATGTTGTG 496  
 |||  
 Sbjct 61 GGGCCAAAAGCCAAGGTTTAACAAAACCTTTAGGATTGGTTCTAAACCTGAGATGTTGTG 120

Query 497 GAAGATACTTAGTACCTGCCGATCTGGTAGTACTGCAAACACTAGTTGTAAGGCCACGA 556  
 |||  
 Sbjct 121 GAAGATACTTAGTACCTACCGATCTGGTAGTACTGCAAACACTAGTTGTAAGGCCACGA 180

Query 557 AGGATGCCCAGAAGGTACCCATAGGTAACAAGTGACACTATGGATCTGATCTGGGGCCAG 616  
 |||  
 Sbjct 181 AGGATGCCCAGAAGGTACCCATAGGTAACAAGCGCACACAATGGATCTGATCTGGGGCCAG 240

Query 617 GTACCTCTATC 627  
 |||







```

Sbjct 439  |||...||| 380
Query 500  GATACTTAGTACCTGCCGATCTGGTAGTACTGCAAACACTAGTTGTAAGGCCACGAAGG 559
Sbjct 379  GATACTTAGTACCTACCGATCTGGTAGTAGTGCAAACACTAGTTGTAAGGCCACGAAGG 320
Query 560  ATGCCCAGAAGGTACCCATAGGTAACAAGTGACACTATGGATCTGATCTGGGGCCAGGTA 619
Sbjct 319  ATGCCCAGAAGGTACCCATAGGTAACAAGCGACACTATGGATCTGATCTGGGGCCAGGTA 260
Query 620  CCTCTATCTTGGTGACCT 637
Sbjct 259  CCTCTATCTGGGT-ACCT 243

```

>SRR2298573.374775 374775 length=500  
Length=500

Score = 431 bits (233), Expect = 2e-116  
Identities = 245/251 (98%), Gaps = 0/251 (0%)  
Strand=Plus/Plus

```

Query 439  GCCAAAAGCCAAGGTCTAACAAACCCTTTAGGATTGGTTCTAAACCTGAGATGTTGTGGA 498
Sbjct 1     GCCAAAAGCCAAGGTCTAACAAACCCTTTAGGATTGGTTCTAAACCTGAGATGTTGTGGA 60
Query 499  AGATACTTAGTACCTGCCGATCTGGTAGTACTGCAAACACTAGTTGTAAGGCCACGAAG 558
Sbjct 61   AGATACTTAGTACCTACCGATCTGGTAGTAGTGCAAACACTAGTTGTAAGGCCACGAAG 120
Query 559  GATGCCCAGAAGGTACCCATAGGTAACAAGTGACACTATGGATCTGATCTGGGGCCAGGT 618
Sbjct 121  GATGCCCAGAAGGTACCCATAGGTAACAAGCGACACTATGGATCTGATCTGGGGCCAGGT 180
Query 619  ACCTCTATCTTGGTGACCTGGTTAAAAAAGCGTCTAGTGGGCCAAAACCCgggggggATCCC 678
Sbjct 181  ACCTCTATCTTGGTGATCTGGTTAAAAAAGCGTCTAGTGGGCCAAAACCCGGGGGGGATCCC 240
Query 679  CGGTTTCCTTT 689
Sbjct 241  CGGTTTCCTTT 251

```

Score = 370 bits (200), Expect = 4e-98  
Identities = 233/249 (94%), Gaps = 2/249 (1%)  
Strand=Plus/Minus

```

Query 488  GATGTTGTGGAAGATACTT-AGTACCTGCCGATCTGGTAGTACTGCAAACACTAGTTGTA 546
Sbjct 498  GATGTTTGGGAAGATTCTTAAGT-CCTACCGTTTGGTAGTAGTGCAAACACTAGTTGTA 440
Query 547  AGGCCACGAAGGATGCCCAGAAGGTACCCATAGGTAACAAGTGACACTATGGATCTGAT 606
Sbjct 439  AGGCCACGAAGGATGCCCAGAAGGTACCCATAGGTAACAAGCGGCACTATGGATCTGAT 380
Query 607  CTGGGGCCAGGTACCTCTATCTTGGTGACCTGGTTAAAAAAGCGTCTAGTGGGCCAAAACCC 666
Sbjct 379  CTGGGGCCAGGTACCTCTATCTTGGTGATCTGGTTAAAAAAGCGTCTAGTGGGCCAAAACCC 320

```

```

Query 667 gggggggATCCCCGGTTTCCTTTTATTTTATCAATGCTACAATGGAGACAATTAAAAGTA 726
          |||
Sbjct 319 GGGGGGGATCCCCGGTTTCCTTTTATTTTATCAATGCCACTATGGAGACAATTAAGAGTA 260

Query 727 TTGCAGATA 735
          |||
Sbjct 259 TTGCAGATA 251

```

>SRR2298573.349802 349802 length=500  
Length=500

Score = 431 bits (233), Expect = 2e-116  
Identities = 243/248 (98%), Gaps = 0/248 (0%)  
Strand=Plus/Minus

```

Query 336 TTGTGAGACGTCTGGTGACGTGTGGGAACTTATTGGAAGCAACATTTTGCTGCAAAGCAT 395
          |||
Sbjct 248 TTGTGAGACGTCTGGTGACGTGTGGGAACTTATTGGAACAACATTTTGCTGTAAAGCAT 189

Query 396 CCTATTGCCAGCGGAACAACACCTGGTAACAGGTGCCTCTGGGGCCAAAAGCCAAGGTCT 455
          |||
Sbjct 188 CCTATTGCCAGCGGAACAACACCTGGTAACAGGTGCCTCTGGGGCCAAAAGCCAAGGTTT 129

Query 456 AACAAACCCCTTTAGGATTGGTTCTAAACCTGAGATGTTGTGGAAGATACTTAGTACCTGC 515
          |||
Sbjct 128 AACAAACCCCTTTAGGATTGGTTCTAAACCTGAGATGTTGTGGAAGATACTTAGTACCTAC 69

Query 516 CGATCTGGTAGTACTGCAAACACTAGTTGTAAGGCCACGAAGGATGCCCAGAAGGTACC 575
          |||
Sbjct 68 CGATCTGGTAGTACTGCAAACACTAGTTGTAAGGCCACGAAGGATGCCCAGAAGGTACC 9

Query 576 CATAGGTA 583
          |||
Sbjct 8 CATAGGTA 1

```

Score = 390 bits (211), Expect = 3e-104  
Identities = 237/250 (95%), Gaps = 0/250 (0%)  
Strand=Plus/Plus

```

Query 310 GCTCACACAGCCATCCTCTAGTAAGTTTGTGAGACGTCTGGTGACGTGTGGGAACTTATT 369
          |||
Sbjct 251 GCTCACACAGCCATCCTCTAGTAAGCTTGTGAGACGTCTGGTGACGTGTGGGAACTTATT 310

Query 370 GGAAGCAACATTTTGCTGCAAAGCATCCTATTGCCAGCGGAACAACACCTGGTAACAGGT 429
          |||
Sbjct 311 GGAAACAACATTTTGCTGTAAAGCATCCTATTGCCAGCGGAACAACACCTGGTAACAGGT 370

Query 430 GCCTCTGGGGCCAAAAGCCAAGGTCTAACAAACCCCTTTAGGATTGGTTCTAAACCTGAGA 489
          |||
Sbjct 371 GCCTCTGGGGCCAAAAGCCAAGGTTAACAAACCCCTTTAGGATTGGTTCTAAACCTGAGA 430

Query 490 TGTGTGGAAGATACTTAGTACCTGCCGATCTGGTAGTACTGCAAACACTAGTTGTAAGG 549
          |||
Sbjct 431 TGTGTGGAAGATACTTAAAACCTACCGATCTGGTAGTAGGGCAAACACCTGGTGTAAAGG 490

Query 550 CCCACGAAGG 559

```

Sbjct 491 ||||| CCCCCGAAGG 500

>SRR2298573.317178 317178 length=500  
Length=500

Score = 431 bits (233), Expect = 2e-116  
Identities = 245/251 (98%), Gaps = 0/251 (0%)  
Strand=Plus/Minus

Query 453 TCTAACAAAACCCCTTTAGGATTGGTTCTAAACCTGAGATGTTGTGGAAGATACTTAGTACC 512  
|||||  
Sbjct 252 TCTAACAAAACCCCTTTAGGATTGGTTCTAAACCTGAGATGTTGGGGAAGATACTTAGTACC 193

Query 513 TGCCGATCTGGTAGTACTGCAAACACTAGTTGTAAGGCCACGAAGGATGCCCAGAAGGT 572  
| |||||  
Sbjct 192 TACCGATCTGGTAGTAGTGCAAACACTAGTTGTAAGGCCACGAAGGATGCCCAGAAGGT 133

Query 573 ACCCATAGGTAACAAGTGACACTATGGATCTGATCTGGGGCCAGGTACCTCTATCTTGGT 632  
|||||  
Sbjct 132 ACCCATAGGTAACAAGCGACACTATGGATCTGATCTGGGGCCAGGTACCTCTATCTTGGT 73

Query 633 GACCTGGTTAAAAAGCGTCTAGTGGGCCAAAACCCgggggggATCCCCGTTTCCTTTTAT 692  
|| |||||  
Sbjct 72 GATCTGGTTAAAAAACGTCCTAGTGGGCCAAAACCCGGGGGGGATCCCCGTTTCCTTTTAT 13

Query 693 TTTATCAATGC 703  
|||||  
Sbjct 12 TTTATCAATGC 2

Score = 379 bits (205), Expect = 7e-101  
Identities = 235/250 (94%), Gaps = 0/250 (0%)  
Strand=Plus/Plus

Query 409 GAACAACACCTGGTAACAGGTGCCTCTGGGGCCAAAAGCCAAGGTCTAACAAAACCCCTTTA 468  
|||||  
Sbjct 251 GAACAACACCTGGTAACAGGTGCCTCTGGGGCCAAAAGCCAAGGTCTAACAAAACCCCTTTA 310

Query 469 GGATTGGTTCTAAACCTGAGATGTTGTGGAAGATACTTAGTACCTGCCGATCTGGTAGTA 528  
|||||  
Sbjct 311 GGATTGGTTCTAAACCTGAGATGTTGTGGAAGATACTTAGTACCTACCGATCTGGTAGTA 370

Query 529 CTGCAAACACTAGTTGTAAGGCCACGAAGGATGCCCAGAAGGTACCCATAGGTAACAAG 588  
|||||  
Sbjct 371 GTGCAAACACTAGTTGTAAGTCCACGAAGGATGCCCAGAAGGAACCCATAGGTAACAAAAG 430

Query 589 TGACACTATGGATCTGATCTGGGGCCAGGTACCTCTATCTTGGTGACCTGGTTAAAAAGC 648  
|||||  
Sbjct 431 CAACACTATGGACCTGACCTGGGGCCAGGGACCCCTATCTTGGTGTCTTGGTTAAAAAAC 490

Query 649 GTCTAGTGGG 658  
| |||||  
Sbjct 491 GCCTAGTGGG 500

>SRR2298573.316987 316987 length=500  
Length=500

Score = 431 bits (233), Expect = 2e-116  
Identities = 243/248 (98%), Gaps = 0/248 (0%)  
Strand=Plus/Plus

```
Query 334 GTTTGTGAGACGTCTGGTGACGTGTGGGAACCTATTGGAAGCAACATTTTGCTGCAAAGC 393
          |||
Sbjct 1 GTTTGTGAGACGTCTGGTGACGTGTGGGAACCTATTGGAACAACATTTTGCTGTAAAGC 60

Query 394 ATCCTATTGCCAGCGGAACAACACCTGGTAACAGGTGCCTCTGGGGCCAAAAGCCAAGGT 453
          |||
Sbjct 61 ATCCTATTGCCAGCGGAACAACACCTGGTAACAGGTGCCTCTGGGGCCAAAAGCCAAGGT 120

Query 454 CTAACAAACCCCTTAGGATTGGTTCTAAACCTGAGATGTTGTGGAAGATACTTAGTACCT 513
          |||
Sbjct 121 TTAACAAACCCCTTAGGATTGGTTCTAAACCTGAGATGTTGTGGAAGATACTTAGTACCT 180

Query 514 GCCGATCTGGTAGTACTGCAAACACTAGTTGTAAGGCCACGAAGGATGCCCAGAAGGTA 573
          |||
Sbjct 181 ACCGATCTGGTAGTACTGCAAACACTAGTTGTAAGGCCACGAAGGATGCCCAGAAGGTA 240

Query 574 CCCATAGG 581
          |||
Sbjct 241 CCCATAGG 248
```

Score = 424 bits (229), Expect = 3e-114  
Identities = 243/250 (97%), Gaps = 0/250 (0%)  
Strand=Plus/Minus

```
Query 354 CGTGTGGGAACCTATTGGAAGCAACATTTTGCTGCAAAGCATCCTATTGCCAGCGGAACA 413
          |||
Sbjct 499 CGTGTGGGAACCTATTGGAACAACATTTTGCTGTAAAGCATCCTATTGCCAGCGGAACA 440

Query 414 ACACCTGGTAACAGGTGCCTCTGGGGCCAAAAGCCAAGGTCTAACAAACCCCTTAGGATT 473
          |||
Sbjct 439 ACGCCTGGTAACAGGTGCCTCTGGGGCCAAAAGCCAAGGTTTAACAAACCCCTTAGGATT 380

Query 474 GGTTCCTAAACCTGAGATGTTGTGGAAGATACTTAGTACCTGCCGATCTGGTAGTACTGCA 533
          |||
Sbjct 379 GGTTCCTAAACCTGAGATGTTGTGGAAGATACTTAGTACCTACCGATCTGGTAGTACTGCA 320

Query 534 AACACTAGTTGTAAGGCCACGAAGGATGCCCAGAAGGTACCCATAGGTAACAAGTGACA 593
          |||
Sbjct 319 AACACTAGTTGTAAGGCCACGAAGGATGCCCAGAAGGTACCCATAGGTAACAAGCGACA 260

Query 594 CTATGGATCT 603
          |||
Sbjct 259 CTATGGATCT 250
```

>SRR2298573.312469 312469 length=500  
Length=500

Score = 431 bits (233), Expect = 2e-116  
Identities = 248/255 (97%), Gaps = 1/255 (0%)  
Strand=Plus/Plus

```
Query 335 TTTGTGAGACGTCTGGTGACGTGTGGGAACCTATTGGAAGCAACATTTTGCTGCAAAGCA 394
```

```

Sbjct 1      |||
TTTGTGAGACGTCTGGTGACGTGTGGGAACCTTATTGGAAACAACATTTTGCTGTAAAGCA 60
Query 395    TCCTATTGCCAGCGGAACAACACCTGGTAACAGGTGCCTCTGGGGCCAAAAGCCAAGGTC 454
|||
Sbjct 61      TCCTATTGCCAGCGGAACAACACCTGGTAACAGGTGCCTCTGGGGCCAAAAGCCAAGGTT 120
Query 455    TAACAAACCCTTTAGGATTGGTTCTAAACCTGAGATGTTGTGGAAGATACTTAGTACCTG 514
|||
Sbjct 121    TAACAAACCCTTTAGGATTGGTTCTAAACCTGAGATGTTGTGGAAGATACTTAGTACCTA 180
Query 515    CCGATCTGGTAGTACTGCAAACACTAGTTGTAAGGCCACGAAGGATGCCCAGAAGGTAC 574
|||
Sbjct 181    CCGATCTGGTAGTACTGCAAACACTAGTTGTAAGGCCACGAAGGATGCCCAGAAGGTAC 240
Query 575    CCATAGGTAAC-AAG 588
|||
Sbjct 241    CCATAGGAAACCAAG 255

```

Score = 398 bits (215), Expect = 2e-106  
Identities = 239/251 (95%), Gaps = 0/251 (0%)  
Strand=Plus/Minus

```

Query 382    TTGCTGCAAAGCATCCTATTGCCAGCGGAACAACACCTGGTAACAGGTGCCTCTGGGGCC 441
|||
Sbjct 500    TTGCGGTAAAGCTCCCTATGTCCGGCGGAACAACCCCTGGTAACAGGTGCCTCTGGGGCC 441
Query 442    AAAAGCCAAGGTCTAACAAACCCTTTAGGATTGGTTCTAAACCTGAGATGTTGTGGAAGA 501
|||
Sbjct 440    AAAAGCCAAGGTTAACAAACCCTTTAGGATTGGTTCTAAACCTGAGATGTTGTGGAAGA 381
Query 502    TACTTAGTACCTGCCGATCTGGTAGTACTGCAAACACTAGTTGTAAGGCCACGAAGGAT 561
|||
Sbjct 380    TACTTAGTACCTACCGATCTGGTAGTACTGCAAACACTAGTTGTAAGGCCACGAAGGAT 321
Query 562    GCCCAGAAGGTACCCATAGGTAACAAGTGACACTATGGATCTGATCTGGGGCCAGGTACC 621
|||
Sbjct 320    GCCCAGAAGGTACCCATAGGTAACAAGTGACACTATGGATCTGATCTGGGGCCAGGTACC 261
Query 622    TCTATCTTGGT 632
|||
Sbjct 260    TCTATCTTGGT 250

```

>SRR2298573.312255 312255 length=500  
Length=500

Score = 431 bits (233), Expect = 2e-116  
Identities = 245/251 (98%), Gaps = 0/251 (0%)  
Strand=Plus/Plus

```

Query 384    GCTGCAAAGCATCCTATTGCCAGCGGAACAACACCTGGTAACAGGTGCCTCTGGGGCCAA 443
|||
Sbjct 1      GCTGTAAAGCATCCTATTGCCAGCGGAACAACACCTGGTAACAGGTGCCTCTGGGGCCAA 60
Query 444    AAGCCAAGGTCTAACAAACCCTTTAGGATTGGTTCTAAACCTGAGATGTTGTGGAAGATA 503
|||
Sbjct 61      AAGCCAAGGTTAACAAACCCTTTAGGATTGGTTCTAAACCTGAGATGTTGTGGAAGATA 120

```

```

Query 504 CTTAGTACCTGCCGATCTGGTAGTACTGCAAACACTAGTTGTAAGGCCACGAAGGATGC 563
          |||
Sbjct 121 CTTAGTACCTACCGATCTGGTAGTACTGCAAACACTAGTTGTAAGGCCACGAAGGATGC 180

Query 564 CCAGAAGGTACCCATAGGTAACAAGTGACACTATGGATCTGATCTGGGGCCAGGTACCTC 623
          |||
Sbjct 181 CCAGAAGGTACCCATAGGTAACAAGCGACACAATGGATCTGATCTGGGGCCAGGTACCTC 240

Query 624 TATCTTGGTGA 634
          |||
Sbjct 241 TATCTTGGTGA 251

```

Score = 418 bits (226), Expect = 2e-112  
Identities = 240/247 (97%), Gaps = 0/247 (0%)  
Strand=Plus/Minus

```

Query 395 TCCTATTGCCAGCGGAACAACACCTGGTAACAGGTGCCTCTGGGGCCAAAAGCCAAGGTC 454
          |||
Sbjct 497 TCCTTTTGCCAGCGGAACAACCCCTGGTAACAGGTGCCTCTGGGGCCAAAAGCCAAGGTT 438

Query 455 TAACAAACCCTTTAGGATTGGTTCTAAACCTGAGATGTTGTGGAAGATACTTAGTACCTG 514
          |||
Sbjct 437 TAACAAACCCTTTAGGATTGGTTCTAAACCTGAGATGTTGTGGAAGATACTTAGTACCTA 378

Query 515 CCGATCTGGTAGTACTGCAAACACTAGTTGTAAGGCCACGAAGGATGCCCAGAAGGTAC 574
          |||
Sbjct 377 CCGATCTGGTAGTACTGCAAACACTAGTTGTAAGGCCACGAAGGATGCCCAGAAGGTAC 318

Query 575 CCATAGGTAACAAGTGACACTATGGATCTGATCTGGGGCCAGGTACCTCTATCTTGGTGA 634
          |||
Sbjct 317 CCATAGGTAACAAGCGACACTATGGATCTGATCTGGGGCCAGGTACCTCTATCTTGGTGA 258

Query 635 CCTGGTT 641
          |||
Sbjct 257 TCTGGTT 251

```

>SRR2298573.293391 293391 length=500  
Length=500

Score = 431 bits (233), Expect = 2e-116  
Identities = 248/255 (97%), Gaps = 1/255 (0%)  
Strand=Plus/Plus

```

Query 367 ATTGGAAGCAACATTTTGCTGCAAAGCATCCTATTGCCAGCGGAACAACACCTGGTAACA 426
          |||
Sbjct 1 ATTGGAACAACATTTTGCTGTAAAGCATCCTATTGCCAGCGGAACAACACCTGGTAACA 60

Query 427 GGTGCCTCTGGGGCCAAAAGCCAAGGTCTAACAAACCCTTTAGGATTGGTTCTAAACCTG 486
          |||
Sbjct 61 GGTGCCTCTGGGGCCAAAAGCCAAGGTTTAAACAAACCCTTTAGGATTGGTTCTAAACCTG 120

Query 487 AGATGTTGTGGAAGATACTTAGTACCTGCCGATCTGGTAGTACTGCAAACACTAGTTGTA 546
          |||
Sbjct 121 AGATGTTGTGGAAGATACTTAGTACCTACCGATCTGGTAGTACTGCAAACACTAGTTGTA 180

Query 547 AGGCCACGAAGGATGCCCAGAAGGTACCCATAGGTAACAAGTGACACTATGGATCTGAT 606

```



```
Sbjct 181 |||||
AGGCCCACGAAGGATGCCCAGAAGGTACCCATAGGTAACAAGCGACACTATGGATCTGAT 240
Query 607 CTGGGGCCAGGTACC 621
|||||
Sbjct 241 CTGGGGCCAGG-ACC 254
```

Score = 346 bits (187), Expect = 7e-91
Identities = 230/251 (92%), Gaps = 1/251 (0%)
Strand=Plus/Minus

```
Query 502 TACTTAGTACCTGCCGATCTGGTAGTACTGCAAACACTAGTTGTAAGGCCACGAAGGAT 561
|||||
Sbjct 500 TACTT-GTCCCTACCGTACTGGTTGTAGTGCCAACCCCTGTTTGAAGGCCACGAAGGAT 442
Query 562 GCCCAGAAGGTACCCATAGGTAACAAGTGACACTATGGATCTGATCTGGGGCCAGGTACC 621
|||||
Sbjct 441 GCCCAGGAGGTACCCATAGGTAACAAGCGACCCTATGGATCTGATCTGGGGCCAGGTACC 382
Query 622 TCTATCTTGGTGACCTGGTTAAAAAGCGTCTAGTGGGCCAAAACCCgggggggATCCCCGG 681
|||||
Sbjct 381 TCTATCTTGGTGATCTGGTTAAAAAACGTCTAGTGGACCAAACCCGGGGGGGATCCCCGG 322
Query 682 TTTCCTTTTATTTTATCAATGCTACAATGGAGACAATTTAAAGTATTGCAGATATGGCGA 741
|||||
Sbjct 321 TTTCCTTTTATTTTATCAATGCCACTATGGAGACAATTAAGAGTATTGCAGATATGGCGA 262
Query 742 CCGGAGTGGTC 752
|||||
Sbjct 261 CCGGAGTGGTC 251
```

>SRR2298573.278399 278399 length=500
Length=500

Score = 431 bits (233), Expect = 2e-116
Identities = 254/264 (96%), Gaps = 1/264 (0%)
Strand=Plus/Minus

```
Query 327 CTAGTAAGTTTGTGAGACGTCTGGTGACGTGTGGGAACCTTATTGGAAGCAACATTTTGCT 386
|||||
Sbjct 499 CTAGTAAGTTTGTGAGACGTCTGGTGACGTGTGGGAACCTTATTGGAACAACATTTTGCT 440
Query 387 GCAAAGCATCCTATTGCCAGCGGAACAACACCTGGTAACAGGTGCCTCTGGGGCCAAAAG 446
|
Sbjct 439 GTAAAGCATCCTATTGCCAGCGGAACAACCCCTGGTAACAGGTGCCTCTGGGGCCAAAAG 380
Query 447 CCAAGGTCTAACAAACCCTTTAGGATTGGTTCTAAACCTGAGATGTTGTGGAAGATACTT 506
|||||
Sbjct 379 CCAAGGTTTAAACAACCCTTTAGGATTGGTTCTAAACCTGAGATGTTGTGGAAGATACTT 320
Query 507 AGTACCTGCCGATCTGGTAGTACTGCAAACACTAGTTGTAAGGCCACGAAGGATGCCCA 566
|||||
Sbjct 319 AGTACCTACCGATCTGGTAGTAGTGCAAACACTAGTTGTAAGGCCACGAAGGATGCCCA 260
Query 567 GAAGGTACCCA-TAGGTAACAAGT 589
|||||
Sbjct 259 GAAGGTACCCGGTAGGTACTAAGT 236
```

Score = 414 bits (224), Expect = 2e-111  
 Identities = 236/242 (98%), Gaps = 0/242 (0%)  
 Strand=Plus/Plus

```

Query 276 TCTACTAGTGAGATACCACGCTTGTGGACCTTATGCTCACACAGCCATCCTCTAGTAAGT 335
      |||||
Sbjct 9 TCTATTAGTGAGATACCATGCTTGTGGACCTTATGCTCACACAGCCATCCTCTAGTAAGT 68

Query 336 TTGTGAGACGTCTGGTGACGTGTGGGAACCTTATTGGAAGCAACATTTTGGCTGCAAAGCAT 395
      |||||
Sbjct 69 TTGTGAGACGTCTGGTGACGTGTGGGAACCTTATTGGAACAACATTTTGGCTGTAAAGCAT 128

Query 396 CCTATTGCCAGCGGAACAACACCTGGTAACAGGTGCCTCTGGGGCCAAAAGCCAAGGTCT 455
      |||||
Sbjct 129 CCTATTGCCAGCGGAACAACACCTGGTAACAGGTGCCTCTGGGGCCAAAAGCCAAGGTTT 188

Query 456 AACAAACCCTTTAGGATTGGTTCTAAACCTGAGATGTTGTGGAAGATACTTAGTACCTGC 515
      |||||
Sbjct 189 AACAAACCCTTTAGGATTGGTTCTAAACCTGAGATGTTGTGGAAGATACTTAGTACCTAC 248

Query 516 CG 517
      ||
Sbjct 249 CG 250
  
```

>SRR2298573.240500 240500 length=500  
 Length=500

Score = 431 bits (233), Expect = 2e-116  
 Identities = 245/251 (98%), Gaps = 0/251 (0%)  
 Strand=Plus/Plus

```

Query 374 GCAACATTTTGGCTGCAAAGCATCCTATTGCCAGCGGAACAACACCTGGTAACAGGTGCCT 433
      |||||
Sbjct 250 GCAACATTTTGGCTGTAAAGCATCCTATTGCCAGCGGAACAACACCTGGTAACAGGTGCCT 309

Query 434 CTGGGGCCAAAAGCCAAGGTCTAAACAAACCCTTTAGGATTGGTTCTAAACCTGAGATGTT 493
      |||||
Sbjct 310 CTGGGGCCAAAAGCCAAGGTTTAAACAAACCCTTTAGGATTGGTTCTAAACCTGAGATGTT 369

Query 494 GTGGAAGATACTTAGTACCTGCCGATCTGGTAGTACTGCAAACACTAGTTGTAAGGCCCA 553
      |||||
Sbjct 370 GTGGAAGATACTTAGTACCTACCGATCTGGTAGTACTGCAAACACTAGTTGTAAGGCCCA 429

Query 554 CGAAGGATGCCCGAAGGTACCCATAGGTAACAAGTGACACTATGGATCTGATCTGGGGC 613
      |||||
Sbjct 430 CGAAGGATGCCCGAAGGTACCCATAGGTAACAAGCGACACTATGGATCTGACCTGGGGC 489

Query 614 CAGGTACCTCT 624
      |||||
Sbjct 490 CAGGTACCTCT 500
  
```

Score = 416 bits (225), Expect = 6e-112  
 Identities = 241/249 (97%), Gaps = 0/249 (0%)  
 Strand=Plus/Minus

```

Query 417 CCTGGTAACAGGTGCCTCTGGGGCCAAAAGCCAAGGTCTAACAAACCCTTTAGGATTGGT 476
          |||
Sbjct 249 CCTGGTAAAAGGTGCCTCTGGGGCCAAAAGCCAAGGTTTAAACAAACCCTTTAGGATTGGT 190

Query 477 TCTAAACCTGAGATGTTGTGGAAGATACTTAGTACCTGCCGATCTGGTAGTACTGCAAAC 536
          |
Sbjct 189 TTTAAACCTGAGATGTTGTGGAAGATACTTAGTACCTTCCGATCTGGTAGTAGTGCAAAC 130

Query 537 ACTAGTTGTAAGGCCACGAAGGATGCCAGAAAGGTACCCATAGGTAACAAGTGACACTA 596
          |||
Sbjct 129 ACTAGTTGTAAGGCCACGAAGGATGCCAGAAAGGTACCCATAGGTAACAAGCGACACTA 70

Query 597 TGGATCTGATCTGGGGCCAGGTACCTCTATCTTGGTGACCTGGTTAAAAAGCGTCTAGTG 656
          |||
Sbjct 69 TGGATCTGATCTGGGGCCAGGTACCTCTATCTTGGTGATCTGGTTAAAAAACGCTCTAGTG 10

Query 657 GGCCAAACC 665
          |||
Sbjct 9 GGCCAAACC 1

```

```

>SRR2298573.235938 235938 length=500
Length=500

```

```

Score = 431 bits (233), Expect = 2e-116
Identities = 245/251 (98%), Gaps = 0/251 (0%)
Strand=Plus/Plus

```

```

Query 377 ACATTTTGCTGCAAAGCATCCTATTGCCAGCGGAACAACACCTGGTAACAGGTGCCTCTG 436
          |||
Sbjct 1 ACATTTTGCTGTAAAGCATCCTATTGCCAGCGGAACAACACCTGGTAACAGGTGCCTCTG 60

Query 437 GGGCCAAAAGCCAAGGTCTAACAAACCCTTTAGGATTGGTTCTAAACCTGAGATGTTGTG 496
          |||
Sbjct 61 GGGCCAAAAGCCAAGGTTTAAACAAACCCTTTAGGATTGGTTCTAAACCTGAGATGTTGTG 120

Query 497 GAAGATACTTAGTACCTGCCGATCTGGTAGTACTGCAAACACTAGTTGTAAGGCCACGA 556
          |||
Sbjct 121 AAAGATACTTAGTACCTACCGATCTGGTAGTAGTGCAAACACTAGTTGTAAGGCCACGA 180

Query 557 AGGATGCCAGAAAGGTACCCATAGGTAACAAGTGACACTATGGATCTGATCTGGGGCCAG 616
          |||
Sbjct 181 AGGATGCCAGAAAGGTACCCATAGGTAACAAGCGACACTATGGATCTGATCTGGGGCCAG 240

Query 617 GTACCTCTATC 627
          |||
Sbjct 241 GTACCTCTATC 251

```

```

Score = 379 bits (205), Expect = 7e-101
Identities = 233/247 (94%), Gaps = 0/247 (0%)
Strand=Plus/Minus

```

```

Query 426 AGGTGCCTCTGGGGCCAAAAGCCAAGGTCTAACAAACCCTTTAGGATTGGTTCTAAACCT 485
          |||
Sbjct 497 AGGGGCCCCGGGGCCAAAAGCCAAGGGTTTAAACAAACCCTTTAGGATTGGTTCTAAACCT 438

Query 486 GAGATGTTGTGGAAGATACTTAGTACCTGCCGATCTGGTAGTACTGCAAACACTAGTTGT 545
          |||

```

Sbjct 437 GAGATGTTGTGAAAGATTCTTAGTACCTACCGATCTGGTAGTAGTGCAAACACTAGTTGT 378

Query 546 AAGGCCACGAAGGATGCCAGAAAGGTACCCATAGGTAACAAGTGACACTATGGATCTGA 605  
 |||

Sbjct 377 AAGGCCACGAAGGATGCCAGAAAGGTACCCATAGGTAACAAGCGACACTATGGATCTGA 318

Query 606 TCTGGGGCCAGGTACCTCTATCTTGGTGACCTGGTTAAAAAGCGTCTAGTGGGCCAAACC 665  
 |||

Sbjct 317 TCTGGGGCCAGGTACCTCTAGCTTGGTGATCTGGTTAAAAAACGTCTAGTGGGCCAAACC 258

Query 666 Cgggggg 672  
 |||

Sbjct 257 CGGGGG 251

>SRR2298573.227970 227970 length=500  
 Length=500

Score = 431 bits (233), Expect = 2e-116  
 Identities = 243/248 (98%), Gaps = 0/248 (0%)  
 Strand=Plus/Minus

Query 384 GCTGCAAAGCATCCTATTGCCAGCGGAACAACACCTGGTAACAGGTGCCTCTGGGGCCAA 443  
 |||

Sbjct 498 GCTGTAAAGCATCCTATTGCCAGCGGAACAACACCTGGTAACAGGTGCCTCTGGGGCCAA 439

Query 444 AAGCCAAGGTCTAACAAACCCTTTAGGATTGGTTCTAAACCTGAGATGTTGTGGAAGATA 503  
 |||

Sbjct 438 AAGCCAAGGTTTAACAAACCCTTTAGGATTGGTTCTAAACCTGAGATGTTGTGGAAGATA 379

Query 504 CTTAGTACCTGCCGATCTGGTAGTACTGCAAACACTAGTTGTAAGGCCACGAAGGATGC 563  
 |||

Sbjct 378 CTTAGTACCTACCGATCTGGTAGTAGTGCAAACACTAGTTGTAAGGCCACGAAGGATGC 319

Query 564 CCAGAAGGTACCCATAGGTAACAAGTGACACTATGGATCTGATCTGGGGCCAGGTACCTC 623  
 |||

Sbjct 318 CCAGAAGGTACCCATAGGTAACAAGCGACACTATGGATCTGATCTGGGGCCAGGTACCTC 259

Query 624 TATCTTGG 631  
 |||

Sbjct 258 TATCTTGG 251

Score = 418 bits (226), Expect = 2e-112  
 Identities = 240/247 (97%), Gaps = 0/247 (0%)  
 Strand=Plus/Plus

Query 385 CTGCAAAGCATCCTATTGCCAGCGGAACAACACCTGGTAACAGGTGCCTCTGGGGCCAAA 444  
 |||

Sbjct 1 CTGTAAAGCATCCTATTGCCAGCGGAACAACACCTGGTAACAGGTGCCTCTGGGGCCAAA 60

Query 445 AGCCAAGGTCTAACAAACCCTTTAGGATTGGTTCTAAACCTGAGATGTTGTGGAAGATAC 504  
 |||

Sbjct 61 AGCCAAGGTTTAACAAACCCTTTAGGATTGGTTCTAAACCTGAGATGTTGTGGAAGATAC 120

Query 505 TTAGTACCTGCCGATCTGGTAGTACTGCAAACACTAGTTGTAAGGCCACGAAGGATGCC 564  
 |||

Sbjct 121 TTAGTACCTACCGATCTGGTAGTAGTGCAAACACTAGTTGTAAGGCCACGAAGGATGCC 180

```

Query 565 CAGAAGGTACCCATAGGTAACAAGTGACACTATGGATCTGATCTGGGGCCAGGTACCTCT 624
          |||
Sbjct 181 CAGAAGGTACCCATAGGTAACAAGCGCACACTATGGATCTGAACTGGGGCCAGGAACCTCT 240

Query 625 ATCTTGG 631
          |||
Sbjct 241 ATCTTGG 247

```

>SRR2298573.171554 171554 length=500  
Length=500

Score = 431 bits (233), Expect = 2e-116  
Identities = 245/251 (98%), Gaps = 0/251 (0%)  
Strand=Plus/Plus

```

Query 304 CCTTATGCTCACACAGCCATCCTCTAGTAAGTTTGTGAGACGCTCTGGTGACGTGTGGGAA 363
          |||
Sbjct 1 CCTTATGCTCACACAGCCATCCTCTAGTAAGTTTGTGAGACGCTCTGGTGACGTGTGGGAA 60

Query 364 CTTATTGGAAGCAACATTTTGCTGCAAAGCATCCTATTGCCAGCGGAACAACACCTGGTA 423
          |||
Sbjct 61 CTTATTGAAAACAACATTTTGCTGTAAAGCATCCTATTGCCAGCGGAACAACACCTGGTA 120

Query 424 ACAGGTGCCTCTGGGGCCAAAAGCCAAGGTTAACAAACCCTTTAGGATTGGTTCTAAAC 483
          |||
Sbjct 121 ACAGGTGCCTCTGGGGCCAAAAGCCAAGGTTAACAAACCCTTTAGGATTGGTTCTAAAC 180

Query 484 CTGAGATGTTGTGGAAGATACTTAGTACCTGCCGATCTGGTAGTACTGCAAACACTAGTT 543
          |||
Sbjct 181 CTGAGATGTTGTGGAAGATACTTAGTACCTACCAGATCTGGTAGTACTGCAAACACTAGTT 240

Query 544 GTAAGGCCAC 554
          |||
Sbjct 241 GTAAGGCCAC 251

```

Score = 396 bits (214), Expect = 7e-106  
Identities = 238/250 (95%), Gaps = 0/250 (0%)  
Strand=Plus/Minus

```

Query 541 GTTGTAAGGCCACGAAGGATGCCAGAAGGTACCCATAGGTAACAAGTGACACTATGGA 600
          |||
Sbjct 500 GTTGTAAGGCCACGAAGGGTGCCAGAAGGTACCCATAGGTAACAAGCGACCCATGGA 441

Query 601 TCTGATCTGGGGCCAGGTACCTCTATCTTGGTGACCTGGTTAAAAAGCGTCTAGTGGGCC 660
          |||
Sbjct 440 TCTGATCTGGGGCCAGGTACCTTTATCTTGGTGATCTGGTTAAAAAACGCTCTAGTGGGCC 381

Query 661 AAACCCgggggggATCCCCGGTTTCCTTTTATTTTATCAATGCTACAATGGAGACAATTA 720
          |||
Sbjct 380 AAACCCGGGGGGATCCCCGGTTTCCTTTTATTTTATCAATGCCACTATGGAGACAATTA 321

Query 721 AAAGTATTGCAGATATGGCGACCGGAGTGGTCAGTTCAGTTGATTCCACTATCAATGCAG 780
          |
Sbjct 320 AGAGTATTGCAGATATGGCGACCGGAGTGGTCAGTTCAGTTGATTCCACTATCAATGTAG 261

Query 781 TTAATGAGAG 790
          |||

```

Sbjct 260 TTAATGAGAG 251

>SRR2298573.169771 169771 length=500  
Length=500

Score = 431 bits (233), Expect = 2e-116  
Identities = 245/251 (98%), Gaps = 0/251 (0%)  
Strand=Plus/Plus

```
Query 438  GGCCAAAAGCCAAGGTCTAACAAACCCCTTAGGATTGGTTCTAAACCTGAGATGTTGTGG 497
          |||
Sbjct 1     GGCCAAAAGCCAAGGTTAACAAACCCCTTAGGATTGGTTCTAAACCTGAGATGTTGTGG 60

Query 498  AAGATACTTAGTACCTGCCGATCTGGTAGTACTGCAAACACTAGTTGTAAGGCCACGAA 557
          |||
Sbjct 61   AAGATACTTAGTACCTACCGATCTGGTAGTAGTGCAAACACTAGTTGTAAGGCCACGAA 120

Query 558  GGATGCCCAGAAAGGTACCCATAGGTAACAAGTGACACTATGGATCTGATCTGGGGCCAGG 617
          |||
Sbjct 121  GGATGCCCAGAAAGGTACCCATAGGTAACAAGCGACACTATGGATCTGATCTGGGGCCAGG 180

Query 618  TACCTCTATCTTGGTGACCTGGTTAAAAAGCGTCTAGTGGGCCAAACCCgggggggATCC 677
          |||
Sbjct 181  TACCTCTATCTTGGTGATCTGGTTAAAAAACGTCTAGTGGGCCAAACCCGGGGGGGATCC 240

Query 678  CCGGTTTCCTT 688
          |||
Sbjct 241  CCGGTTTCCTT 251
```

Score = 418 bits (226), Expect = 2e-112  
Identities = 242/250 (97%), Gaps = 0/250 (0%)  
Strand=Plus/Minus

```
Query 504  CTTAGTACCTGCCGATCTGGTAGTACTGCAAACACTAGTTGTAAGGCCACGAAGGATGC 563
          |||
Sbjct 500  CTTAGTACCTACCGATCTGGTAGTAGTGCAAACACTAGTTGTAAGGCCACGAAGGATGC 441

Query 564  CCAGAAGGTACCCATAGGTAACAAGTGACACTATGGATCTGATCTGGGGCCAGGTACCTC 623
          |||
Sbjct 440  CCAGAAGGTACCCATAGGTAACAAGCGACACTATGGATCTGATCTGGGGCCAGGTACCTC 381

Query 624  TATCTTGGTGACCTGGTTAAAAAGCGTCTAGTGGGCCAAACCCgggggggATCCCCGGTT 683
          |||
Sbjct 380  TATCTTGGTGATCTGGTTAAAAAACGTCTAGTGGGCCAAACCCGGGGGGGATCCCCGGTT 321

Query 684  TCCTTTTATTTTATCAATGCTACAATGGAGACAATTTAAAAGTATTGCAGATATGGCGACC 743
          |||
Sbjct 320  TCCTTTTATTTTATCAATGCCACTATGGAGACAATTAAGAGTATTGCAGATATGGCGACC 261

Query 744  GGAGTGGTCA 753
          |||
Sbjct 260  GGAGTGGTCA 251
```

>SRR2298573.140309 140309 length=500  
Length=500

Score = 431 bits (233), Expect = 2e-116  
Identities = 245/251 (98%), Gaps = 0/251 (0%)  
Strand=Plus/Plus

```
Query 428 GTGCCTCTGGGGCCAAAAGCCAAGGTCTAACAAACCCCTTTAGGATTGGTTCTAAACCTGA 487
|||||
Sbjct 1 GTGCCTCTGGGGCCAAAAGCCAAGGTCTAACAAACCCCTTTAGGATTGGTTCTAAACCTGA 60

Query 488 GATGTTGTGGAAGATACTTAGTACCTGCCGATCTGGTAGTACTGCAAACACTAGTTGTAA 547
|||||
Sbjct 61 GATGTTGTGGAAGATACTTAGTACCTACCGATCTGGTAGTAGTGCAAACACTAGTTGTAA 120

Query 548 GGCCACGAAGGATGCCCAGAAGGTACCCATAGGTAACAAGTGACACTATGGATCTGATC 607
|||||
Sbjct 121 GGCCACGAAGGATGCCCAGAAGGTACCCATAGGTAACAAGCGACACTATGGATCTGATC 180

Query 608 TGGGGCCAGGTACCTCTATCTTGGTGACCTGGTTAAAAAGCGTCTAGTGGGGCCAAACCCg 667
|||||
Sbjct 181 TGGGGCCAGGTACCTCTATCTTGGTGATCTGGTTAAAAAACGTCTAGTGGGGCCAAACCCG 240

Query 668 ggggggATCCC 678
|||||
Sbjct 241 GGGGGGATCCC 251
```

Score = 401 bits (217), Expect = 2e-107  
Identities = 239/250 (96%), Gaps = 0/250 (0%)  
Strand=Plus/Minus

```
Query 483 CCTGAGATGTTGTGGAAGATACTTAGTACCTGCCGATCTGGTAGTACTGCAAACACTAGT 542
|||||
Sbjct 500 CCTGGGAGGTTGTGGAAGATACTTAGTACCTACAGATCTGGTAGTAGTGCAAACACTAGT 441

Query 543 TGTAAGGCCACGAAGGATGCCCAGAAGGTACCCATAGGTAACAAGTGACACTATGGATC 602
|||||
Sbjct 440 TGTAAGGCCACGAAGGATGCCCAGAAGGTACCCATAGGTAACAAGCGACACTATGGATC 381

Query 603 TGATCTGGGGCCAGGTACCTCTATCTTGGTGACCTGGTTAAAAAGCGTCTAGTGGGGCCAA 662
|||||
Sbjct 380 TGATCTGGGGCCAGGTACCTCTATCTTGGTGATCTGGTTAAAAAACGTCTAGTGGGGCCAA 321

Query 663 ACCCGggggggATCCCCGTTTCCTTTTATTTTATCAATGCTACAATGGAGACAATTAAA 722
|||||
Sbjct 320 ACCCGGGGGGATCCCCGTTTCCTTTTATTTTATCAATGCCACTATGGAGACAATTAAAG 261

Query 723 AGTATTGCAG 732
|||||
Sbjct 260 AGTATTGCAG 251
```

>SRR2298573.137408 137408 length=500  
Length=500

Score = 431 bits (233), Expect = 2e-116  
Identities = 245/251 (98%), Gaps = 0/251 (0%)  
Strand=Plus/Plus

```
Query 285 GAGATACCACGCTTGTGGACCTTATGCTCACACAGCCATCCTCTAGTAAGTTTGTGAGAC 344
|||||
```

```

Sbjct 1 GAGATACCATGCTTGTGGACCTTATGCTCACACAGCCATCCTCTAGTAAGTTTGTGAGAC 60
Query 345 GTCTGGTGACGTGTGGGAACTTATTGGAAGCAACATTTTGCTGCAAAGCATCCTATTGCC 404
|
Sbjct 61 GTCTGGTGACGTGTGGGAACTTATTGGAACAACATTTTGCTGTAAAGCATCCTATTGCC 120
Query 405 AGCGGAACAACACCTGGTAACAGGTGCCTCTGGGGCCAAAAGCCAAGGTCTAACAAACCC 464
|
Sbjct 121 AGCGGAACAACACCTGGTAACAGGTGCCTCTGGGGCCAAAAGCCAAGGTTTAAACAAACCC 180
Query 465 TTTAGGATTGGTTCTAAACCTGAGATGTTGTGGAAGATACTTAGTACCTGCCGATCTGGT 524
|
Sbjct 181 TTTAGGATTGGTTCTAAACCTGAGATGTTGTGGAAGATACTTAGTACCTACCGATCTGGT 240
Query 525 AGTACTGCAA 535
|
Sbjct 241 AGTAGTGCAA 251

```

Score = 429 bits (232), Expect = 7e-116  
Identities = 244/250 (98%), Gaps = 0/250 (0%)  
Strand=Plus/Minus

```

Query 380 TTTTGCTGCAAAGCATCCTATTGCCAGCGGAACAACACCTGGTAACAGGTGCCTCTGGGG 439
|
Sbjct 499 TTTTGCTGTAAAGCATCCTATTGCCAGCGGAACAACACCTGGTAACAGGTGCCTCGGGGG 440
Query 440 CAAAAAGCCAAGGTCTAACAAACCCTTTAGGATTGGTTCTAAACCTGAGATGTTGTGGAA 499
|
Sbjct 439 CAAAAAGCCAAGGTTTAAACAAACCCTTTAGGATTGGTTCTAAACCTGAGATGTTGTGGAA 380
Query 500 GATACTTAGTACCTGCCGATCTGGTAGTACTGCAAACACTAGTTGTAAGGCCACGAAGG 559
|
Sbjct 379 GATACTTAGTACCTACCGATCTGGTAGTACTGCAAACACTAGTTGTAAGGCCACGAAGG 320
Query 560 ATGCCCAGAAGGTACCCATAGGTAACAAGTGACACTATGGATCTGATCTGGGGCCAGGTA 619
|
Sbjct 319 ATGCCCAGAAGGTACCCATAGGTAACAAGCGACACTATGGATCTGATCTGGGGCCAGGTA 260
Query 620 CCTCTATCTT 629
|
Sbjct 259 CCTCTATCTT 250

```

>SRR2298573.125219 125219 length=500  
Length=500

Score = 431 bits (233), Expect = 2e-116  
Identities = 243/248 (98%), Gaps = 0/248 (0%)  
Strand=Plus/Plus

```

Query 456 AACAAACCCTTTAGGATTGGTTCTAAACCTGAGATGTTGTGGAAGATACTTAGTACCTGC 515
|
Sbjct 1 AACAAACCCTTTAGGATTGGTTCTAAACCTGAGATGTTGTGGAAGATACTTAGTACCTAC 60
Query 516 CGATCTGGTAGTACTGCAAACACTAGTTGTAAGGCCACGAAGGATGCCCAGAAGGTACC 575
|
Sbjct 61 CGATCTGGTAGTACTGCAAACACTAGTTGTAAGGCCACGAAGGATGCCCAGAAGGTACC 120

```



```

Query 576 CATAGGTAACAAGTGACACTATGGATCTGATCTGGGGCCAGGTACCTCTATCTTGGTGAC 635
          |||
Sbjct 121 CATAGGTAACAAGCGACACTATGGATCTGATCTGGGGCCAGGTACCTCTATCTTGGTGAT 180

Query 636 CTGGTTAAAAAGCGTCTAGTGGGCCAAACCCgggggggATCCCCGGTTTCCTTTATTTT 695
          |||
Sbjct 181 CTGGTTAAAAAACGTCTAGTGGGCCAAACCCGGGGGGGATCCCCGGTTTCCTTTATTTT 240

Query 696 ATCAATGC 703
          |||
Sbjct 241 ATCAATGC 248

```

Score = 412 bits (223), Expect = 7e-111  
Identities = 241/250 (96%), Gaps = 0/250 (0%)  
Strand=Plus/Minus

```

Query 476 TTCTAAACCTGAGATGTTGTGGAAGATACTTAGTACCTGCCGATCTGGTAGTACTGCAAA 535
          |||
Sbjct 500 TTCTAAACCTGAGATGTTGTGGAAGATACTTAGTCCCTACCGATCTGGTAGTAGTGCAAA 441

Query 536 CACTAGTTGTAAGGCCACGAAGGATGCCCAGAAGGTACCCATAGGTAACAAGTGACACT 595
          |||
Sbjct 440 CACTAGTTGTAAGGCCACGAAGGATGCCCAGAAGGTACCCATAGGTAACAAGCGACACT 381

Query 596 ATGGATCTGATCTGGGGCCAGGTACCTCTATCTTGGTGACCTGGTTAAAAAGCGTCTAGT 655
          |||
Sbjct 380 ATGGATCTGATCTGGGGCCAGGTACCTCTATCTTGGTGATCTGGTTAAAAAACGTCTAGT 321

Query 656 GGGCCAAACCCgggggggATCCCCGGTTTCCTTTATTTTATCAATGCTACAATGGAGAC 715
          |||
Sbjct 320 GGGCCAAACCCGGGGGGGATCCCCGGTTTCCTTTATTTTATCAATGCCACTATGGAGAC 261

Query 716 AATTAAAAGT 725
          |||
Sbjct 260 AATTAAGAGT 251

```

>SRR2298573.38478 38478 length=500  
Length=500

Score = 431 bits (233), Expect = 2e-116  
Identities = 245/251 (98%), Gaps = 0/251 (0%)  
Strand=Plus/Plus

```

Query 450 AGGTCTAACAAACCCCTTTAGGATTGGTTCTAAACCTGAGATGTTGTGGAAGATACTTAGT 509
          |||
Sbjct 250 AGGTTTAACAAACCCCTTTAGGATTGGTTCTAAACCTGAGATGTTGTGGAAGATACTTAGT 309

Query 510 ACCTGCCGATCTGGTAGTACTGCAAACACTAGTTGTAAGGCCACGAAGGATGCCCAGAA 569
          |||
Sbjct 310 ACCTACCGATCTGGTAGTAGTGCAAACACTAGTTGTAAGGCCACGAAGGATGCCCAGAA 369

Query 570 GGTACCCATAGGTAACAAGTGACACTATGGATCTGATCTGGGGCCAGGTACCTCTATCTT 629
          |||
Sbjct 370 GGTACCCATAGGTAACAAGCGACACTATGGATCTGATCTGGGGCCAGGTACCTCTATCTT 429

Query 630 GGTGACCTGGTTAAAAAGCGTCTAGTGGGCCAAACCCgggggggATCCCCGGTTTCCTTT 689
          |||

```

Sbjct 430 GGTGATCTGGTTAAAAAACGTCTAGTGGGCCAAAACCCGGGGGGGATCCCCGGTTTCCTTT 489  
 Query 690 TATTTTATCAA 700  
 |||||  
 Sbjct 490 TATTTTATCAA 500

Score = 403 bits (218), Expect = 4e-108  
 Identities = 236/245 (96%), Gaps = 0/245 (0%)  
 Strand=Plus/Minus

Query 530 TGCAAACACTAGTTGTAAGGCCACGAAGGATGCCCAGAAGGTACCCATAGGTAACAAGT 589  
 ||||| || |||| |  
 Sbjct 245 TGCAAACCTGGTTGGAAGGCCACGAAGGATGCCCAGAAGGTACCCATAGGTAACAAGC 186

Query 590 GACACTATGGATCTGATCTGGGGCCAGGTACCTCTATCTTGGTGACCTGGTTAAAAAGCG 649  
 |||||  
 Sbjct 185 GACACTATGGATCTGATCTGGGGCCAGGTACCTCTATCTTGGTGATCTGGTTAAAAAACG 126

Query 650 TCTAGTGGGCCAAAACCCgggggggATCCCCGGTTTCCTTTTATTTTATCAATGCTACAAT 709  
 |||||  
 Sbjct 125 TCTAGTGGGCCAAAACCCGGGGGGGATCCCCGGTTTCCTTTTATTTTATCAATGCCACTAT 66

Query 710 GGAGACAATTAAGAGTATTGCAGATATGGCGACCGGAGTGGTCAGTTCAGTTGATTCCAC 769  
 |||||  
 Sbjct 65 GGAGACAATTAAGAGTATTGCAGATATGGCGACCGGAGTGGTCAGTTCAGTTGATTCCAC 6

Query 770 TATCA 774  
 |||||  
 Sbjct 5 TATCA 1

>SRR2298573.11925 11925 length=500  
 Length=500

Score = 431 bits (233), Expect = 2e-116  
 Identities = 246/252 (98%), Gaps = 1/252 (0%)  
 Strand=Plus/Plus

Query 450 AGGTCTAACAAACCCCTTTAGGATTGGTTCTAAACCTGAGATGTTGTGGAAGATACTTAGT 509  
 |||| |  
 Sbjct 1 AGGTTTAAACAAACCCCTTTAGGATTGGTTCTAAACCTGAGATGTTGTGGAAGATACTTAGT 60

Query 510 ACCTGCCGATCTGGTAGTACTGCAAACACTAGTTGTAAGGCCACGAAGGATGCCCAGAA 569  
 |||| |  
 Sbjct 61 ACCTACCGATCTGGTAGTAGTGCAAACACTAGTTGTAAGGCCACGAAGGATGCCCAGAA 120

Query 570 GGTACCCATAGGTAACAAGTGACACTATGGATCTGATCTGGGGCCAGGTACCTCTATCTT 629  
 |||||  
 Sbjct 121 GGTACCCATAGGTAACAAGCGACACTATGGATCTGATCTGGGGCCAGGTACCTCTATCTT 180

Query 630 GGTGACCTGGTTAAAAAGCGTCTAGTGGGCCAAAACCCgggggggATCCCCGGTTTCCTTT 689  
 |||||  
 Sbjct 181 GGTGATCTGGTTAAAAA-CGTCTAGTGGGCCAAAACCCGGGGGGGATCCCCGGTTTCCTTT 239

Query 690 TATTTTATCAAT 701  
 |||||  
 Sbjct 240 TATTTTATCAAT 251

Score = 316 bits (171), Expect = 6e-82  
Identities = 227/254 (89%), Gaps = 3/254 (1%)  
Strand=Plus/Minus

```
Query 564 CCAGAAGGTACCCATAGGTAACAAG-TGACACTATGGATCTGATCTGGGGCCAGGTACCT 622
||||||| ||| ||||||| | | ||| ||||||| ||||| ||||| |||
Sbjct 499 CCAGAAGGGCACCATGAGTAACAAGCCGCCCTTAT-GATCTGGGTTGGGGTCAGGTTCCCT 441

Query 623 CTATCTTGGTGACCTGGTTAAAAAGCGTCTAGTGGGCCAAAACCCgggggggATCCCCGGT 682
||||||||| ||||||||||| ||| ||||||||||| ||||||||||| |||||||||||
Sbjct 440 TTATCTTGGTGATCTGGTTAAAAA-CGTTTAGTGGGCCAAAACCCGGGGGGGATCCCCGGT 382

Query 683 TTCCTTTTATTTTATCAATGCTACAATGGAGACAATTTAAAAGTATTGCAGATATGGCGAC 742
||||||||| || ||||||||||| ||||||||||| ||||||||||| |||||||||||
Sbjct 381 TTCCTTTTATTTTATCAATGCCACTATGGAGACAATTAAGAGTATTGCAGATATGGCGAC 322

Query 743 CGGAGTGGTCAGTTCAGTTGATTCCACTATCAATGCAGTTAATGAGAGAGTAGAAAAATGT 802
||||||||| ||||||||||| ||||||||||| ||||||||||| |||||||||||
Sbjct 321 CGGAGTGGTCAGTTCAGTTGATTCCACTATCAATGTAGTTAATGAGAGAGTGGAAAAATGT 262

Query 803 GGGCAATGAAATTG 816
|| |||||||||
Sbjct 261 AGGTAATGAAATTG 248
```

>SRR2298546.866875 866875 length=501  
Length=501

Score = 431 bits (233), Expect = 2e-116  
Identities = 245/251 (98%), Gaps = 0/251 (0%)  
Strand=Plus/Minus

```
Query 1276 AACCTGTTGTGACATATGACTCAAAGTTAGAATTTGGAGCATTTACCAATTTACCACATG 1335
||||||||| ||||||||||| ||||||||||| ||||||||||| |||||||||||
Sbjct 501 AACCTGTTGTGACATATGACTCAAAGTTAGAATTTGGAGCGTTTACCAATTTACCACATG 442

Query 1336 TATTGATGAATTTGGCTGAGACCACACAGGCTGATTTATGTATCCCCTATGTTGCTGACA 1395
| ||||||||||| ||||||||||| ||||||||||| ||||||||||| |||||||||||
Sbjct 441 TGTTGATGAATTTGGCTGAGACCACACAGGCTGATTTATGTATCCCCTATGTTGCTGACA 382

Query 1396 CAAACTATGTTAAAACGGATTTCGTCAGACTTAGGGCAACTAAAAGTCTATGTTTGGACAC 1455
||||||||| ||||||||||| ||||||||||| ||||||||||| |||||||||||
Sbjct 381 CAAACTATGTTAAAACAGATTTCGTCAGACTTAGGGCAACTAAAAGTCTATGTTTGGACAC 322

Query 1456 CTTTATCTATAACCTTCAGGTTCTGCGACACAAGTTGATGTAACCATATTGGGTAGTTTAT 1515
||||||| ||||||||||| ||||||||||| ||||||||||| |||||||||||
Sbjct 321 CTTTATCCATAACCTTCAGGTTCTGCTACACAAGTTGATGTTACCATATTGGGTAGTTTAT 262

Query 1516 TGCAATTGGAC 1526
|||||||||
Sbjct 261 TGCAATTGGAC 251
```

Score = 429 bits (232), Expect = 7e-116  
Identities = 242/247 (98%), Gaps = 0/247 (0%)  
Strand=Plus/Plus

```
Query 1249 GTAGTGCATTTGGTGGTGTATGAACCCAAACCTGTTGTGACATATGACTCAAAGTTAGAAT 1308
```

```

Sbjct 1      |||
GTAGTGCATTGGTGGTGTATGAACCCAAACCTGTTGTGACATATGACTCAAAGTTAGAAT 60
Query 1309   TTGGAGCATTTACCAATTTACCACATGTATTGATGAATTTGGCTGAGACCACACAGGCTG 1368
|||
Sbjct 61     TTGGAGCGTTTACCAATTTACCACATGTGTTGATGAATTTGGCTGAGACCACACAGGCTG 120
Query 1369   ATTTATGTATCCCCTATGTTGCTGACACAAACTATGTTAAAACGGATTCGTCAGACTTAG 1428
|||
Sbjct 121    ATTTATGTATCCCCTATGTTGCTGACACAAACTATGTTAAAACAGATTCGTCAGACTTAG 180
Query 1429   GGCAACTAAAAGTCTATGTTTGGACACCTTTATCTATACCTTCAGGTTCTGCGACACAAG 1488
|||
Sbjct 181    GGCAACTAAAAGTCTATGTTTGGACACCTTTATCCATACCTTCAGGTTCTGCTACACAAG 240
Query 1489   TTGATGT 1495
|||
Sbjct 241    TTGATGT 247

```

>SRR2298546.783224 783224 length=502  
Length=502

Score = 431 bits (233), Expect = 2e-116  
Identities = 245/251 (98%), Gaps = 0/251 (0%)  
Strand=Plus/Plus

```

Query 1259   GGTGGTGTATGAACCCAAACCTGTTGTGACATATGACTCAAAGTTAGAATTTGGAGCATT 1318
|||
Sbjct 252     GGTGGTGTATGAACCCAAACCTGTTGTGACATATGACTCAAAGTTAGAATTTGGAGCGTT 311
Query 1319   TACCAATTTACCACATGTATTGATGAATTTGGCTGAGACCACACAGGCTGATTTATGTAT 1378
|||
Sbjct 312     TACCAATTTACCACATGTGTTGATGAATTTGGCTGAGACCACACAGGCTGATTTATGTAT 371
Query 1379   CCCCTATGTTGCTGACACAAACTATGTTAAAACGGATTCGTCAGACTTAGGGCAACTAAA 1438
|||
Sbjct 372     CCCCTATGTTGCTGACACAAACTATGTTAAAACAGATTCGTCAGACTTAGGGCAACTAAA 431
Query 1439   AGTCTATGTTTGGACACCTTTATCTATACCTTCAGGTTCTGCGACACAAGTTGATGTAAC 1498
|||
Sbjct 432     AGTCTATGTTTGGACACCTTTATCCATACCTTCAGGTTCTGCTACACAAGTTGATGTTAC 491
Query 1499   CATATTGGGTA 1509
|||
Sbjct 492     CATATTGGGTA 502

```

Score = 409 bits (221), Expect = 9e-110  
Identities = 241/251 (96%), Gaps = 0/251 (0%)  
Strand=Plus/Minus

```

Query 1319   TACCAATTTACCACATGTATTGATGAATTTGGCTGAGACCACACAGGCTGATTTATGTAT 1378
|||
Sbjct 251     TACCAATTTACCACATGTGTTGATGAATTTGGCTGAGACCACACAGGCTGATTTATGTAT 192
Query 1379   CCCCTATGTTGCTGACACAAACTATGTTAAAACGGATTCGTCAGACTTAGGGCAACTAAA 1438
|||
Sbjct 191     CCCCTATGTTGCTGACACAAACTATGTTAAAACAGATTCGTCAGACTTAGGGCAACTAAA 132

```

```

Query 1439 AGTCTATGTTTGGACACCTTTATCTATAACCTTCAGGTTCTGCGACACAAGTTGATGTAAC 1498
          |||
Sbjct 131 AGTCTATGTTTGGACACCTTTATCCATAACCTTCAGGTTCTGCTACACAAGTTGATGTTAC 72

Query 1499 CATATTGGGTAGTTTATTGCAATTGGACTTCCAAAATCCTAGGGTGTGGCCAAGACGT 1558
          |||
Sbjct 71 CATATTGGGTAGCTTATTGCAATTGGACTTCCAAAATCCTAGGGTATTCGGTCAAGACGT 12

Query 1559 TGGTATCTATG 1569
          |||
Sbjct 11 TGGTATTTATG 1

```

>SRR2298546.762882 762882 length=502  
Length=502

Score = 431 bits (233), Expect = 2e-116  
Identities = 245/251 (98%), Gaps = 0/251 (0%)  
Strand=Plus/Minus

```

Query 1258 TGGTGGTGTATGAACCCAAACCTGTTGTGACATATGACTCAAAGTTAGAATTTGGAGCAT 1317
          |||
Sbjct 502 TGGTGGTGTATGAACCCAAACCTGTTGTGACATATGACTCAAAGTTAGAATTTGGAGCGT 443

Query 1318 TTACCAATTTACCACATGTATTGATGAATTTGGCTGAGACCACACAGGCTGATTTATGTA 1377
          |||
Sbjct 442 TTACCAATTTACCACATGTGTTGATGAATTTGGCTGAGACCACACAGGCTGATTTATGTA 383

Query 1378 TCCCCTATGTTGCTGACACAAACTATGTTAAAACGGATTCGTCAGACTTAGGGCAACTAA 1437
          |||
Sbjct 382 TCCCCTATGTTGCTGACACAAACTATGTTAAAACAGATTCGTCAGACTTAGGGCAACTAA 323

Query 1438 AAGTCTATGTTTGGACACCTTTATCTATAACCTTCAGGTTCTGCGACACAAGTTGATGTAA 1497
          |||
Sbjct 322 AAGTCTATGTTTGGACACCTTTATCCATAACCTTCAGGTTCTGCTACACAAGTTGATGTTA 263

Query 1498 CCATATTGGGT 1508
          |||
Sbjct 262 CCATATTGGGT 252

```

Score = 422 bits (228), Expect = 1e-113  
Identities = 242/249 (97%), Gaps = 0/249 (0%)  
Strand=Plus/Plus

```

Query 1218 GTGCAAGTGAATGTTAACCAAGGAACAGCTGGTAGTGCATTGGTGGTGTATGAACCCAAA 1277
          |||
Sbjct 3 GTACAAGTGAATGTTAATCAAGGAACAGCCGGTAGTGCATTGGTGGTGTATGAACCCAAA 62

Query 1278 CCTGTTGTGACATATGACTCAAAGTTAGAATTTGGAGCATTTACCAATTTACCACATGTA 1337
          |||
Sbjct 63 CCTGTTGTGACATATGACTCAAAGTTAGAATTTGGAGCGTTTACCAATTTACCACATGTG 122

Query 1338 TTGATGAATTTGGCTGAGACCACACAGGCTGATTTATGTATCCCCTATGTTGCTGACACA 1397
          |||
Sbjct 123 TTGATGAATTTGGCTGAGACCACACAGGCTGATTTATGTATCCCCTATGTTGCTGACACA 182

Query 1398 AACTATGTTAAAACGGATTCGTCAGACTTAGGGCAACTAAAAGTCTATGTTTGGACACCT 1457

```

```

Sbjct 183  |||
AACTATGTTAAAAACAGATTCGTCAGACTTAGGGCAACTAAAAAGTCTATGTTTGGACACCT 242
Query 1458  TTATCTATA 1466
|||
Sbjct 243  TTATCCATA 251

```

>SRR2298546.676879 676879 length=502  
Length=502

Score = 431 bits (233), Expect = 2e-116  
Identities = 247/254 (97%), Gaps = 0/254 (0%)  
Strand=Plus/Plus

```

Query 1291  ATGACTCAAAGTTAGAATTTGGAGCATTTACCAATTTACCACATGTATTGATGAATTTGG 1350
|||
Sbjct 1      ATGACTCAAAGTTAGAATTTGGAGCGTTTACCAATTTACCACATGTGTTGATGAATTTGG 60
Query 1351  CTGAGACCACACAGGCTGATTTATGTATCCCCTATGTTGCTGACACAAACTATGTTAAAA 1410
|||
Sbjct 61     CTGAGACCACACAGGCTGATTTATGTATCCCCTATGTTGCTGACACAAACTATGTTAAAA 120
Query 1411  CGGATTCGTCAGACTTAGGGCAACTAAAAAGTCTATGTTTGGACACCTTTATCTATACCTT 1470
| |||
Sbjct 121   CAGATTCGTCAGACTTAGGGCAACTAAAAAGTCTATGTTTGGACACCTTTATCCATACCTT 180
Query 1471  CAGGTTCTGCGACACAAGTTGATGTAACCATATTGGGTAGTTTATTGCAATTGGACTTCC 1530
|||
Sbjct 181   CAGGTTCTGCTACACAAGTTGATGTTACCATATTGGGTAGCTTATTGCAATTGGACTTCC 240
Query 1531  AAAATCCTAGGGTG 1544
|||
Sbjct 241   AAAATCCTAGGGTG 254

```

Score = 387 bits (209), Expect = 4e-103  
Identities = 237/251 (94%), Gaps = 0/251 (0%)  
Strand=Plus/Minus

```

Query 1371  TTATGTATCCCCTATGTTGCTGACACAAACTATGTTAAAAACGGATTCGTCAGACTTAGGG 1430
|||
Sbjct 502   TTATGTATCCCCTATGTTGCTGACACAATCTATGTTAAAAACAGATTCGTCAGACTTAGGG 443
Query 1431  CAACTAAAAAGTCTATGTTTGGACACCTTTATCTATACCTTCAGGTTCTGCGACACAAGTT 1490
|||
Sbjct 442   CAACTAAAAAGTCTATGTTTGGACACCTTTATCCATACCTTCAGGTTCTGCTACACAAGTT 383
Query 1491  GATGTAACCATATTGGGTAGTTTATTGCAATTGGACTTCCAAAATCCTAGGGTGTGGC 1550
|||
Sbjct 382   GATGTTACCATATTGGGTAGCTTATTGCAATTGGACTTCCAAAATCCTAGGGTATTCGGT 323
Query 1551  CAAGACGTTGGTATCTATGATAATGCACCAACGCGGAAACAAAATCTTAAAAAGATTCTT 1610
|||
Sbjct 322   CAAGACGTTGGTATTTATGACAATGCACCAACGCGGAAGCAAAAATCTTAAAGAAAATCTT 263
Query 1611  ACAATGAGCAC 1621
|||
Sbjct 262   ACAATGAGCAC 252

```

>SRR2298546.661134 661134 length=501  
Length=501

Score = 431 bits (233), Expect = 2e-116  
Identities = 245/251 (98%), Gaps = 0/251 (0%)  
Strand=Plus/Plus

```
Query 1249 GTAGTGCATTGGTGGTGTATGAACCCAAACCTGTTGTGACATATGACTCAAAGTTAGAAT 1308
          |||
Sbjct 1      GTAGTGCATTGGTGGTGTATGAACCCAAACCTGTTGTGACATATGACTCAAAGTTAGAAT 60

Query 1309 TTGGAGCATTACCAATTTACCACATGTATTGATGAATTTGGCTGAGACCACACAGGCTG 1368
          |||
Sbjct 61     TTGGAGCGTTACCAATTTACCACATGTATTGATGAATTTGGCTGAGACCACACAGGCTG 120

Query 1369 ATTTATGTATCCCCTATGTTGCTGACACAAACTATGTTAAAACGGATTCGTCAGACTTAG 1428
          |||
Sbjct 121    ATTTATGTATCCCCTATGTTGCTGACACAAACTATGTTAAAACAGATTCGTCAGACTTAG 180

Query 1429 GGCAACTAAAAGTCTATGTTTGGACACCTTTATCTATACCTTCAGGTTCTGCGACACAAG 1488
          |||
Sbjct 181    GGCAACTAAAAGTCTATGTTTGGACACCTTTATCCATACCTTCAGGTTCTGCTACACAAG 240

Query 1489 TTGATGTAACC 1499
          |||
Sbjct 241    TTGATGTTACC 251
```

Score = 425 bits (230), Expect = 9e-115  
Identities = 244/251 (97%), Gaps = 0/251 (0%)  
Strand=Plus/Minus

```
Query 1292 TGACTCAAAGTTAGAATTTGGAGCATTACCAATTTACCACATGTATTGATGAATTTGGC 1351
          |||
Sbjct 501    TGACTCAAAGTTAGAATTTGGAGCGTTTACCAATTTACCACATGTGTTGATGAATTTGGC 442

Query 1352 TGAGACCACACAGGCTGATTTATGTATCCCCTATGTTGCTGACACAAACTATGTTAAAAC 1411
          |||
Sbjct 441    TGAGACCACACAGGCTGATTTATGTATCCCCTATGTTGCTGACACAAACTATGTTAAAAC 382

Query 1412 GGATTCGTCAGACTTAGGGCAACTAAAAGTCTATGTTTGGACACCTTTATCTATACCTTC 1471
          |||
Sbjct 381    AGATTCGTCAGACTTAGGGCAACTAAAAGTCTATGTTTGGACACCTTTATCCATACCTTC 322

Query 1472 AGGTTCTGCGACACAAGTTGATGTAACCATATTGGGTAGTTTATTGCAATTGGACTTCCA 1531
          |||
Sbjct 321    AGGTTCTGCTACACAAGTTGATGTTACCATATTGGGTAGCTTATTGCAATTGGACTTCCA 262

Query 1532 AAATCCTAGGG 1542
          |||
Sbjct 261    AAATCCTAGGG 251
```

>SRR2298546.580465 580465 length=501  
Length=501

Score = 431 bits (233), Expect = 2e-116

Identities = 243/248 (98%), Gaps = 0/248 (0%)  
Strand=Plus/Plus

```
Query 1248 GGTAGTGCATTGGTGGTGTATGAACCCAAACCTGTTGTGACATATGACTCAAAGTTAGAA 1307
          |||
Sbjct 251 GGTAGTGCATTGGTGGTGTATGAACCCAAACCTGTTGTGACATATGACTCAAAGTTAGAA 310

Query 1308 TTTGGAGCATTTACCAATTTACCACATGTATTGATGAATTTGGCTGAGACCACACAGGCT 1367
          |||
Sbjct 311 TTTGGAGCGTTTACCAATTTACCACATGTGTTGATGAATTTGGCTGAGACCACACAGGCT 370

Query 1368 GATTTATGTATCCCCTATGTTGCTGACACAAACTATGTTAAAACGGATTCGTCAGACTTA 1427
          |||
Sbjct 371 GATTTATGTATCCCCTATGTTGCTGACACAAACTATGTTAAAACAGATTCGTCAGACTTA 430

Query 1428 GGGCAACTAAAAGTCTATGTTTGGACACCTTTATCTATAACCTTCAGGTTCTGCGACACAA 1487
          |||
Sbjct 431 GGGCAACTAAAAGTCTATGTTTGGACACCTTTATCCATACCTTCAGGTTCTGCTACACAA 490

Query 1488 GTTGATGT 1495
          |||
Sbjct 491 GTTGATGT 498
```

Score = 403 bits (218), Expect = 4e-108  
Identities = 240/251 (96%), Gaps = 0/251 (0%)  
Strand=Plus/Minus

```
Query 1329 CCACATGTATTGATGAATTTGGCTGAGACCACACAGGCTGATTTATGTATCCCCTATGTT 1388
          |||
Sbjct 251 CCACATGTGTTGATGAATTTGGCTGAGACCACACAGGCTGATTTATGTATCCCCTATGTT 192

Query 1389 GCTGACACAAACTATGTTAAAACGGATTCGTCAGACTTAGGGCAACTAAAAGTCTATGTT 1448
          |||
Sbjct 191 GCTGACACAAACTATGTTAAAACAGATTCGTCAGACTTAGGGCAACTAAAAGTCTATGTT 132

Query 1449 TGGACACCTTTATCTATAACCTTCAGGTTCTGCGACACAAGTTGATGTAACCATATTGGGT 1508
          |||
Sbjct 131 TGGACACCTTTATCCATACCTTCAGGTTCTGCTACACAAGTTGATGTTACCATATTGGGT 72

Query 1509 AGTTTATTGCAATTGGACTTCCAAAATCCTAGGGTGTGTTGGCCAAGACGTTGGTATCTAT 1568
          |||
Sbjct 71 AGCTTATTGCAATTGGACTTCCAAAATCCTAGGGTATTCGGTCAAGACGTTGGTATTTAT 12

Query 1569 GATAATGCACC 1579
          |||
Sbjct 11 GACAATGCACC 1
```

>SRR2298546.555649 555649 length=502  
Length=502

Score = 431 bits (233), Expect = 2e-116  
Identities = 245/251 (98%), Gaps = 0/251 (0%)  
Strand=Plus/Plus

```
Query 1254 GCATTGGTGGTGTATGAACCCAAACCTGTTGTGACATATGACTCAAAGTTAGAATTTGGA 1313
          |||
Sbjct 1 GCATTGGTGGTGTATGAACCCAAACCTGTTGTGACATATGACTCAAAGTTAGAATTTGGA 60
```





```

Sbjct 121      ||||||||||||||||||||||||||||||||||||||||||||||||||||||||||| 180
                ATCCCCTATGTTGCTGACACAAACTATGTTAAAAACAGATTCGTCAGACTTAGGGCAACTA
Query 1437     AAAGTCTATGTTTGGACACCTTTATCTATAACCTTCAGGTTCTGCGACACAAGTTGATGTA 1496
                |||||||||||||||||||||||||||||||||||||||||||||||||||||||||||
Sbjct 181      AAAGTCTATGTTTGGACACCTTTATCCATACCTTCAGGTTCTGCTACACAAGTTGATGTT 240
Query 1497     ACCATATTGGG 1507
                ||||||||||||||
Sbjct 241      ACCATATTGGG 251

```

Score = 425 bits (230), Expect = 9e-115  
Identities = 244/251 (97%), Gaps = 0/251 (0%)  
Strand=Plus/Minus

```

Query 1292     TGACTCAAAGTTAGAATTTGGAGCATTACCAATTTACCACATGTATTGATGAATTTGGC 1351
                |||||||||||||||||||||||||||||||||||||||||||||||||||||||||||
Sbjct 502      TGACTCAAAGTTAGAATTTGGAGCGTTTACCAATTTACCACATGTGTTGATGAATTTGGC 443
Query 1352     TGAGACCACACAGGCTGATTTATGTATCCCCTATGTTGCTGACACAAACTATGTTAAAAAC 1411
                |||||||||||||||||||||||||||||||||||||||||||||||||||||||||||
Sbjct 442      TGAGACCACACAGGCTGATTTATGTATCCCCTATGTTGCTGACACAAACTATGTTAAAAAC 383
Query 1412     GGATTCGTCAGACTTAGGGCAACTAAAAGTCTATGTTTGGACACCTTTATCTATAACCTTC 1471
                |||||||||||||||||||||||||||||||||||||||||||||||||||||||||||
Sbjct 382      AGATTCGTCAGACTTAGGGCAACTAAAAGTCTATGTTTGGACACCTTTATCCATACCTTC 323
Query 1472     AGGTTCTGCGACACAAGTTGATGTAACCATATTGGGTAGTTTATTGCAATTGGACTTCCA 1531
                |||||||||| |||||||||||||| |||||||||||||| |||||||||||||| ||||||||||
Sbjct 322      AGGTTCTGCTACACAAGTTGATGTTACCATATTGGGTAGCTTATTGCAATTGGACTTCCA 263
Query 1532     AAATCCTAGGG 1542
                ||||||||||||||
Sbjct 262      AAATCCTAGGG 252

```

>SRR2298546.521679 521679 length=502  
Length=502

Score = 431 bits (233), Expect = 2e-116  
Identities = 245/251 (98%), Gaps = 0/251 (0%)  
Strand=Plus/Plus

```

Query 1254     GCATTGGTGGTGTATGAACCCAAACCTGTTGTGACATATGACTCAAAGTTAGAATTTGGA 1313
                |||||||||||||||||||||||||||||||||||||||||||||||||||||||||||
Sbjct 252      GCATTGGTGGTGTATGAACCCAAACCTGTTGTGACATATGACTCAAAGTTAGAATTTGGA 311
Query 1314     GCATTTACCAATTTACCACATGTATTGATGAATTTGGCTGAGACCACACAGGCTGATTTA 1373
                || |||||||||||||||||||||| |||||||||||||| |||||||||||||| ||||||||||
Sbjct 312      GCGTTTACCAATTTACCACATGTGTTGATGAATTTGGCTGAGACCACACAGGCTGATTTA 371
Query 1374     TGTATCCCCTATGTTGCTGACACAAACTATGTTAAAAACGGATTCGTCAGACTTAGGGCAA 1433
                |||||||||||||||||||||||||||||||||||||||||||||||||||||||||||
Sbjct 372      TGTATCCCCTATGTTGCTGACACAAACTATGTTAAAAACAGATTCGTCAGACTTAGGGCAA 431
Query 1434     CTAAAAGTCTATGTTTGGACACCTTTATCTATAACCTTCAGGTTCTGCGACACAAGTTGAT 1493
                |||||||||||||||||||||||||||||||||||||||||||||||||||||||||||
Sbjct 432      CTAAAAGTCTATGTTTGGACACCTTTATCCATACCTTCAGGTTCTGCTACACAAGTTGAT 491

```

Query 1494 GTAACCATATT 1504  
|| |||||  
Sbjct 492 GTTACCATATT 502

Score = 403 bits (218), Expect = 4e-108  
Identities = 240/251 (96%), Gaps = 0/251 (0%)  
Strand=Plus/Minus

Query 1329 CCACATGTATTGATGAATTTGGCTGAGACCACACAGGCTGATTTATGTATCCCCTATGTT 1388  
|||||||  
Sbjct 251 CCACATGTGTTGATGAATTTGGCTGAGACCACACAGGCTGATTTATGTATCCCCTATGTT 192

Query 1389 GCTGACACAAACTATGTTAAAACGGATTCGTCAGACTTAGGGCAACTAAAAGTCTATGTT 1448  
|||||||  
Sbjct 191 GCTGACACAAACTATGTTAAAACAGATTCGTCAGACTTAGGGCAACTAAAAGTCTATGTT 132

Query 1449 TGGACACCTTTATCTATACCTTCAGGTTCTGCGACACAAGTTGATGTAACCATATTGGGT 1508  
|||||||  
Sbjct 131 TGGACACCTTTATCCATACCTTCAGGTTCTGCTACACAAGTTGATGTTACCATATTGGGT 72

Query 1509 AGTTTATTGCAATTGGACTTCCAAAATCCTAGGGTGTGGCCAAGACGTTGGTATCTAT 1568  
|| |||||  
Sbjct 71 AGCTTATTGCAATTGGACTTCCAAAATCCTAGGGTATTCGGTCAAGACGTTGGTATTTAT 12

Query 1569 GATAATGCACC 1579  
|| |||||  
Sbjct 11 GACAATGCACC 1

>SRR2298546.519576 519576 length=502  
Length=502

Score = 431 bits (233), Expect = 2e-116  
Identities = 245/251 (98%), Gaps = 0/251 (0%)  
Strand=Plus/Minus

Query 1258 TGGTGGTGTATGAACCCAAACCTGTTGTGACATATGACTCAAAGTTAGAATTTGGAGCAT 1317  
|||||||  
Sbjct 502 TGGTGGTGTATGAACCCAAACCTGTTGTGACATATGACTCAAAGTTAGAATTTGGAGCGT 443

Query 1318 TTACCAATTTACCACATGTATTGATGAATTTGGCTGAGACCACACAGGCTGATTTATGTA 1377  
|||||||  
Sbjct 442 TTACCAATTTACCACATGTGTTGATGAATTTGGCTGAGACCACACAGGCTGATTTATGTA 383

Query 1378 TCCCCTATGTTGCTGACACAAACTATGTTAAAACGGATTCGTCAGACTTAGGGCAACTAA 1437  
|||||||  
Sbjct 382 TCCCCTATGTTGCTGACACAAACTATGTTAAAACAGATTCGTCAGACTTAGGGCAACTAA 323

Query 1438 AAGTCTATGTTTGGACACCTTTATCTATACCTTCAGGTTCTGCGACACAAGTTGATGTAA 1497  
|||||||  
Sbjct 322 AAGTCTATGTTTGGACACCTTTATCCATACCTTCAGGTTCTGCTACACAAGTTGATGTTA 263

Query 1498 CCATATTGGGT 1508  
|||||||  
Sbjct 262 CCATATTGGGT 252

Score = 407 bits (220), Expect = 3e-109  
Identities = 230/235 (98%), Gaps = 0/235 (0%)  
Strand=Plus/Plus

```
Query 1258 TGGTGGTGTATGAACCCAAACCTGTTGTGACATATGACTCAAAGTTAGAATTTGGAGCAT 1317
          |||
Sbjct 17 TGGTGGTGTATGAACCCAAACCTGTTGTGACATATGACTCAAAGTTAGAATTTGGAGCGT 76

Query 1318 TTACCAATTTACCACATGTATTGATGAATTTGGCTGAGACCACACAGGCTGATTTATGTA 1377
          |||
Sbjct 77 TTACCAATTTACCACATGTATTGATGAATTTGGCTGAGACCACACAGGCTGATTTATGTA 136

Query 1378 TCCCCTATGTTGCTGACACAAACTATGTTAAAACGGATTCGTCAGACTTAGGGCAACTAA 1437
          |||
Sbjct 137 TCCCCTATGTTGCTGACACAAACTATGTTAAAACAGATTCGTCAGACTTAGGGCAACTAA 196

Query 1438 AAGTCTATGTTTGGACACCTTTATCTATAACCTTCAGGTTCTGCGACACAAGTTGA 1492
          |||
Sbjct 197 AAGTCTATGTTTGGACACCTTTATCCATACCTTCAGGTTCTGCTACACAAGTTGA 251
```

>SRR2298546.505689 505689 length=502  
Length=502

Score = 431 bits (233), Expect = 2e-116  
Identities = 245/251 (98%), Gaps = 0/251 (0%)  
Strand=Plus/Plus

```
Query 1259 GGTGGTGTATGAACCCAAACCTGTTGTGACATATGACTCAAAGTTAGAATTTGGAGCATT 1318
          |||
Sbjct 252 GGTGGTGTATGAACCCAAACCTGTTGTGACATATGACTCAAAGTTAGAATTTGGAGCGTT 311

Query 1319 TACCAATTTACCACATGTATTGATGAATTTGGCTGAGACCACACAGGCTGATTTATGTAT 1378
          |||
Sbjct 312 TACCAATTTACCACATGTATTGATGAATTTGGCTGAGACCACACAGGCTGATTTATGTAT 371

Query 1379 CCCCTATGTTGCTGACACAAACTATGTTAAAACGGATTCGTCAGACTTAGGGCAACTAAA 1438
          |||
Sbjct 372 CCCCTATGTTGCTGACACAAACTATGTTAAAACAGATTCGTCAGACTTAGGGCAACTAAA 431

Query 1439 AGTCTATGTTTGGACACCTTTATCTATAACCTTCAGGTTCTGCGACACAAGTTGATGTAAC 1498
          |||
Sbjct 432 AGTCTATGTTTGGACACCTTTATCCATACCTTCAGGTTCTGCTACACAAGTTGATGTTAC 491

Query 1499 CATATTGGGTA 1509
          |||
Sbjct 492 CATATTGGGTA 502
```

Score = 398 bits (215), Expect = 2e-106  
Identities = 239/251 (95%), Gaps = 0/251 (0%)  
Strand=Plus/Minus

```
Query 1508 TAGTTTATTGCAATTGGACTTCCAAAATCCTAGGGTGTGGCCAAAGACGTTGGTATCTA 1567
          |||
Sbjct 251 TAGCTTATTGCAATTGGACTTCCAAAATCCTAGGGTATTCGGTCAAGACGTTGGTATTTA 192

Query 1568 TGATAATGCACCAACGCGGAAACAAAATCTTAAAAGATTCTTACAATGAGCACTAAATA 1627
          |||
```



```

Query 1573 ATGCACCAACGCGGAAACAAAATCTTAAAAAGATTCTTACAATGAGCACTAAATACAAGT 1632
          |||
Sbjct 321 ATGCACCAACGCGGAAGCAAAAATCTTAAAGAAAATCTTACAATGAGCACTAAATACAAGT 262

Query 1633 GGA CTAGGGG 1642
          |||
Sbjct 261 GGA CTAGGGG 252

```

>SRR2298546.429699 429699 length=502  
Length=502

Score = 431 bits (233), Expect = 2e-116  
Identities = 245/251 (98%), Gaps = 0/251 (0%)  
Strand=Plus/Plus

```

Query 1223 AGTGAATGTTAACCAAGGAACAGCTGGTAGTGCATTGGTGGTGTATGAACCCAAACCTGT 1282
          |||
Sbjct 252 AGTGAATGTTAATCAAGGAACAGCCGGTAGTGCATTGGTGGTGTATGAACCCAAACCTGT 311

Query 1283 TGTGACATATGACTCAAAGTTAGAATTTGGAGCATTTACCAATTTACCACATGTATTGAT 1342
          |||
Sbjct 312 TGTGACATATGACTCAAAGTTAGAATTTGGAGCGTTTACCAATTTACCACATGTGTTGAT 371

Query 1343 GAATTTGGCTGAGACCACACAGGCTGATTTATGTATCCCCTATGTTGCTGACACAAACTA 1402
          |||
Sbjct 372 GAATTTGGCTGAGACCACACAGGCTGATTTATGTATCCCCTATGTTGCTGACACAAACTA 431

Query 1403 TGT TAAAAACGGATTTCGTCAGACTTAGGGCAACTAAAAAGTCTATGTTTGGACACCTTTATC 1462
          |||
Sbjct 432 TGT TAAAAACAGATTTCGTCAGACTTAGGGCAACTAAAAAGTCTATGTTTGGACACCTTTATC 491

Query 1463 TATACCTTCAG 1473
          |||
Sbjct 492 CATACCTTCAG 502

```

Score = 414 bits (224), Expect = 2e-111  
Identities = 243/252 (96%), Gaps = 1/252 (0%)  
Strand=Plus/Minus

```

Query 1601 AAAGATTCTTACAATGAGCACTAAATACAAGTGGACTAGGGGAAAAATGACATTGCAGA 1660
          |||
Sbjct 251 AAA-ATTCTTACAATGAGCACTAAATACAAGTGGACTAGGGGAAAAATGACATTGCAGA 193

Query 1661 AGGGCCAGGTTCTATGAACATGGCGAACGTATTGAGTACCACTGCAGCGCAATCAATTGC 1720
          |||
Sbjct 192 AGGGCCAGGTTCTATGAACATGGCGAACGTATTGAGTACCACTGCAGCGCAATCAATTGC 133

Query 1721 TTTGGTTGGAGAAAAGAGCATTCTATGATCCAAGAACAGCAGGAAGCAAGAGTAGGTTTGA 1780
          |||
Sbjct 132 TTTGGTTGGAGAAAAGGCATTCTATGACCAAGAACAGCAGGAAGCAAGAGTAGGTTTGA 73

Query 1781 TGATTTAGTGAAAAATATCCCAACTTTTTTCTGTGATGAGTGACTCCACAACCTCCCTCAGC 1840
          |||
Sbjct 72 TGATTTAGTAAAAATATCTCAACTTTTTTCTGTAATGAGTGACTCCACAACCCCTTCAGC 13

Query 1841 CAACCATGGTAT 1852
          |||

```

Sbjct 12 CAACCATGGCAT 1

>SRR2298546.417769 417769 length=502  
Length=502

Score = 431 bits (233), Expect = 2e-116  
Identities = 245/251 (98%), Gaps = 0/251 (0%)  
Strand=Plus/Minus

```
Query 1225 TGAATGTTAACCAAGGAACAGCTGGTAGTGCATTGGTGGTGTATGAACCCAAACCTGTTG 1284
          |||
Sbjct 251 TGAATGTTAATCAAGGAACAGCCGGTAGTGCATTGGTGGTGTATGAACCCAAACCTGTTG 192

Query 1285 TGACATATGACTCAAAGTTAGAATTTGGAGCATTTACCAATTTACCACATGTATTGATGA 1344
          |||
Sbjct 191 TGACATATGACTCAAAGTTAGAATTTGGAGCGTTTACCAATTTACCACATGTGTTGATGA 132

Query 1345 ATTTGGCTGAGACCACACAGGCTGATTTATGTATCCCCTATGTTGCTGACACAAACTATG 1404
          |||
Sbjct 131 ATTTGGCTGAGACCACACAGGCTGATTTATGTATCCCCTATGTTGCTGACACAAACTATG 72

Query 1405 TTAAAACGGATTCGTCAGACTTAGGGCAACTAAAAGTCTATGTTTGGACACCTTTATCTA 1464
          |||
Sbjct 71 TTAAAACAGATTCGTCAGACTTAGGGCAACTAAAAGTCTATGTTTGGACACCTTTATCCA 12

Query 1465 TACCTTCAGGT 1475
          |||
Sbjct 11 TACCTTCAGGT 1
```

Score = 411 bits (222), Expect = 3e-110  
Identities = 242/252 (96%), Gaps = 0/252 (0%)  
Strand=Plus/Plus

```
Query 1103 AGGACATCAGATAACCCATGTGGAATTGCCAAAAGTCTTTTGGGACAAAAACAGTAAGCC 1162
          |||
Sbjct 251 AGGACATCAGATAACCCATGTGGAACTACCAAAAAGTCTTTTGGGACAAAAACAGCAAGCC 310

Query 1163 AGCCTATGGCCAATCAAGATACTTTGCAGCAGTACGGTGTGGCTTTCATTTTCAGGTGCA 1222
          |||
Sbjct 311 AGCCTATGGCCAATCAAGATACTTTGCAGCAGTACGGTGTGGTTCATTTTCAGGTACA 370

Query 1223 AGTGAATGTTAACCAAGGAACAGCTGGTAGTGCATTGGTGGTGTATGAACCCAAACCTGT 1282
          |||
Sbjct 371 AGTGAATGTTAATCAAGGAACAGCCGGTAGTGCATTGGTGGTGTATGAACCCAAACCTGT 430

Query 1283 TGTGACATATGACTCAAAGTTAGAATTTGGAGCATTTACCAATTTACCACATGTATTGAT 1342
          |||
Sbjct 431 TGTGACATATGACTCAAAGTTAGAATTTGGAGCGTTTACCAATTTACCACATGTGTTGAT 490

Query 1343 GAATTTGGCTGA 1354
          |||
Sbjct 491 GAATTTGGCTGA 502
```

>SRR2298546.405018 405018 length=502  
Length=502

Score = 431 bits (233), Expect = 2e-116  
Identities = 243/248 (98%), Gaps = 0/248 (0%)  
Strand=Plus/Plus

```
Query 1248 GGTAGTGCATTGGTGGTGTATGAACCCAAACCTGTTGTGACATATGACTCAAAGTTAGAA 1307
          |||
Sbjct 252 GGTAGTGCATTGGTGGTGTATGAACCCAAACCTGTTGTGACATATGACTCAAAGTTAGAA 311

Query 1308 TTTGGAGCATTTACCAATTTACCACATGTATTGATGAATTTGGCTGAGACCACACAGGCT 1367
          |||
Sbjct 312 TTTGGAGCGTTTACCAATTTACCACATGTGTTGATGAATTTGGCTGAGACCACACAGGCT 371

Query 1368 GATTTATGTATCCCCTATGTTGCTGACACAAACTATGTTAAAACGGATTCGTCAGACTTA 1427
          |||
Sbjct 372 GATTTATGTATCCCCTATGTTGCTGACACAAACTATGTTAAAACAGATTCGTCAGACTTA 431

Query 1428 GGGCAACTAAAAGTCTATGTTTGGACACCTTTATCTATACCTTCAGGTTCTGCGACACAA 1487
          |||
Sbjct 432 GGGCAACTAAAAGTCTATGTTTGGACACCTTTATCCATACCTTCAGGTTCTGCTACACAA 491

Query 1488 GTTGATGT 1495
          |||
Sbjct 492 GTTGATGT 499
```

Score = 425 bits (230), Expect = 9e-115  
Identities = 244/251 (97%), Gaps = 0/251 (0%)  
Strand=Plus/Minus

```
Query 1268 TGAACCCAAACCTGTTGTGACATATGACTCAAAGTTAGAATTTGGAGCATTTACCAATTT 1327
          |||
Sbjct 251 TGAACCCAAACCTGTTGTGACATATGACTCAAAGTTAGAATTTGGAGCGTTTACCAATTT 192

Query 1328 ACCACATGTATTGATGAATTTGGCTGAGACCACACAGGCTGATTTATGTATCCCCTATGT 1387
          |||
Sbjct 191 ACCACATGTGTTGATGAATTTGGCTGAGACCACACAGGCTGATTTATGTATCCCCTATGT 132

Query 1388 TGCTGACACAAACTATGTTAAAACGGATTCGTCAGACTTAGGGCAACTAAAAGTCTATGT 1447
          |||
Sbjct 131 TGCTGACACAAACTATGTTAAAACAGATTCGTCAGACTTAGGGCAACTAAAAGTCTATGT 72

Query 1448 TTGGACACCTTTATCTATACCTTCAGGTTCTGCGACACAAGTTGATGTAACCATATTGGG 1507
          |||
Sbjct 71 TTGGACACCTTTATCCATACCTTCAGGTTCTGCTACACAAGTTGATGTTACCATATTGGG 12

Query 1508 TAGTTTATTGC 1518
          |||
Sbjct 11 TAGCTTATTGC 1
```

>SRR2298546.355837 355837 length=502  
Length=502

Score = 431 bits (233), Expect = 2e-116  
Identities = 245/251 (98%), Gaps = 0/251 (0%)  
Strand=Plus/Plus

```
Query 1255 CATTGGTGGTGTATGAACCCAAACCTGTTGTGACATATGACTCAAAGTTAGAATTTGGAG 1314
          |||
```





```

Query 1343 GAATTTGGCTGAGACCACACAGGCTGATTTATGTATCCCCTATGTTGCTGACACAAACTA 1402
          |||
Sbjct 371 GAATTTGGCTGAGACCACACAGGCTGATTTATGTATCCCCTATGTTGCTGACACAAACTA 430

Query 1403 TGTAAAAACGGATTCGTCAGACTTAGGGCAACTAAAAGTCTATGTTTGGACACCTTTATC 1462
          |||
Sbjct 431 TGTAAAAACAGATTCGTCAGACTTAGGGCAACTAAAAGTCTATGTTTGGACACCTTTATC 490

Query 1463 TATACCTTCAG 1473
          |||
Sbjct 491 CATACCTTCAG 501

```

Score = 407 bits (220), Expect = 3e-109  
Identities = 240/250 (96%), Gaps = 0/250 (0%)  
Strand=Plus/Minus

```

Query 1312 GAGCATTTACCAATTTACCACATGTATTGATGAATTTGGCTGAGACCACACAGGCTGATT 1371
          |||
Sbjct 250 GAGCGTTTACCAATTTACCACATGTGTTGATGAATTTGGCTGAGACCACACAGGCTGATT 191

Query 1372 TATGTATCCCCTATGTTGCTGACACAAACTATGTTAAAAACGGATTCGTCAGACTTAGGGC 1431
          |||
Sbjct 190 TATGTATCCCCTATGTTGCTGACACAAACTATGTTAAAAACAGATTCGTCAGACTTAGGGC 131

Query 1432 AACTAAAAGTCTATGTTTGGACACCTTTATCTATAACCTTCAGGTTCTGCGACACAAGTTG 1491
          |||
Sbjct 130 AACTAAAAGTCTATGTTTGGACACCTTTATCCATACCTTCAGGTTCTGCTACACAAGTTG 71

Query 1492 ATGTAACCATATTTGGGTAGTTTATTGCAATTGGACTTCCAAAATCCTAGGGTGTGGCC 1551
          |||
Sbjct 70 ATGTTACCATATTTGGGTAGCTTATTGCAATTGGACTTCCAAAATCCTAGGGTATTCGGTC 11

Query 1552 AAGACGTTGG 1561
          |||
Sbjct 10 AAGACGTTGG 1

```

>SRR2298546.275254 275254 length=502  
Length=502

Score = 431 bits (233), Expect = 2e-116  
Identities = 245/251 (98%), Gaps = 0/251 (0%)  
Strand=Plus/Plus

```

Query 1252 GTGCATTGGTGGTGTATGAACCCAAAACCTGTTGTGACATATGACTCAAAGTTAGAATTTG 1311
          |||
Sbjct 252 GTGCATTGGTGGTGTATGAACCCAAAACCTGTTGTGACATATGACTCAAAGTTAGAATTTG 311

Query 1312 GAGCATTTACCAATTTACCACATGTATTGATGAATTTGGCTGAGACCACACAGGCTGATT 1371
          |||
Sbjct 312 GAGCGTTTACCAATTTACCACATGTGTTGATGAATTTGGCTGAGACCACACAGGCTGATT 371

Query 1372 TATGTATCCCCTATGTTGCTGACACAAACTATGTTAAAAACGGATTCGTCAGACTTAGGGC 1431
          |||
Sbjct 372 TATGTATCCCCTATGTTGCTGACACAAACTATGTTAAAAACAGATTCGTCAGACTTAGGGC 431

Query 1432 AACTAAAAGTCTATGTTTGGACACCTTTATCTATAACCTTCAGGTTCTGCGACACAAGTTG 1491
          |||

```

Sbjct 432 AACTAAAAGTCTATGTTTGGACACCTTTATCCATACCTTCAGGTTCTGCTACACAAGTTG 491  
 Query 1492 ATGTAACCATA 1502  
 |||| |||||  
 Sbjct 492 ATGTTACCATA 502

Score = 383 bits (207), Expect = 6e-102  
 Identities = 238/253 (94%), Gaps = 1/253 (0%)  
 Strand=Plus/Minus

Query 1379 CCCCTATGTTGCTGACACAAACTATGTTAAAACGGATTCGTCAGACTTAGGGCAACTAAA 1438  
 |||  
 Sbjct 252 CCCCTATGTTGCTGACACAAACTATGTTAAAACAGATTCGTCAGACTTAGGGCAACTAAA 193

Query 1439 AGTCTATGTTTGGACACCTTTATCTATACCTTCAGGTTCTGCGACACAAGTTGATGTAAC 1498  
 |||  
 Sbjct 192 AGTCTATGTTTGGACACCTTTATCCATACCTTCAGGTTCTGCTACACAAGTTGATGTTAC 133

Query 1499 CATATTGGGTAGTTTATTGCAATTGGACTTCCAAAATCCTAGGGTGTGGCCAAGACGT 1558  
 |||  
 Sbjct 132 CATATTGGGTAGCTTATTGCAATTGGGCTTCCAAAATCCTAGGGTATTCGGTCAAGACGT 73

Query 1559 TGGTATCTATGATAATGCACCAACGCGGAAACAAAATCTTAAAAAGATTCTTACAATGAG 1618  
 |||  
 Sbjct 72 TGG-ATTTATGACAATGCACCAACGCGGAAAGCAAAAATCTTAAAGAAAATTCCTTACAATGAG 14

Query 1619 CACTAAATACAAG 1631  
 |||  
 Sbjct 13 CACTAAATACAAG 1

>SRR2298546.252499 252499 length=501  
 Length=501

Score = 431 bits (233), Expect = 2e-116  
 Identities = 245/251 (98%), Gaps = 0/251 (0%)  
 Strand=Plus/Plus

Query 1249 GTAGTGCATTGGTGGTGTATGAACCCAAACCTGTTGTGACATATGACTCAAAGTTAGAAT 1308  
 |||  
 Sbjct 1 GTAGTGCATTGGTGGTGTATGAACCCAAACCTGTTGTGACATATGACTCAAAGTTAGAAT 60

Query 1309 TTGGAGCATTACCAATTTACCACATGTATTGATGAATTTGGCTGAGACCACACAGGCTG 1368  
 |||  
 Sbjct 61 TTGGAGCGTTTACCAATTTACCACATGTGTTGATGAATTTGGCTGAGACCACACAGGCTG 120

Query 1369 ATTTATGTATCCCTATGTTGCTGACACAAACTATGTTAAAACGGATTCGTCAGACTTAG 1428  
 |||  
 Sbjct 121 ATTTATGTATCCCTATGTTGCTGACACAAACTATGTTAAAACAGATTCGTCAGACTTAG 180

Query 1429 GGCAACTAAAAGTCTATGTTTGGACACCTTTATCTATACCTTCAGGTTCTGCGACACAAG 1488  
 |||  
 Sbjct 181 GGCAACTAAAAGTCTATGTTTGGACACCTTTATCCATACCTTCAGGTTCTGCTACACAAG 240

Query 1489 TTGATGTAACC 1499  
 |||||  
 Sbjct 241 TTGATGTTACC 251

Score = 425 bits (230), Expect = 9e-115  
Identities = 244/251 (97%), Gaps = 0/251 (0%)  
Strand=Plus/Minus

```
Query 1292 TGACTCAAAGTTAGAATTTGGAGCATTTACCAATTTACCACATGTATTGATGAATTTGGC 1351
|||||
Sbjct 501 TGACTCAAAGTTAGAATTTGGAGCGTTTACCAATTTACCACATGTGTTGATGAATTTGGC 442

Query 1352 TGAGACCACACAGGCTGATTTATGTATCCCCTATGTTGCTGACACAAACTATGTTAAAAC 1411
|||||
Sbjct 441 TGAGACCACACAGGCTGATTTATGTATCCCCTATGTTGCTGACACAAACTATGTTAAAAC 382

Query 1412 GGATTCGTCAGACTTAGGGCAACTAAAAGTCTATGTTTGGACACCTTTATCTATACCTTC 1471
|||||
Sbjct 381 AGATTCGTCAGACTTAGGGCAACTAAAAGTCTATGTTTGGACACCTTTATCCATACCTTC 322

Query 1472 AGGTTCTGCGACACAAGTTGATGTAACCATATTGGGTAGTTTATTGCAATTGGACTTCCA 1531
|||||
Sbjct 321 AGGTTCTGCTACACAAGTTGATGTTACCATATTGGGTAGCTTATTGCAATTGGACTTCCA 262

Query 1532 AAATCCTAGGG 1542
|||||
Sbjct 261 AAATCCTAGGG 251
```

>SRR2298546.193011 193011 length=500  
Length=500

Score = 431 bits (233), Expect = 2e-116  
Identities = 245/251 (98%), Gaps = 0/251 (0%)  
Strand=Plus/Plus

```
Query 1228 ATGTTAACCAAGGAACAGCTGGTAGTGCATTGGTGGTGTATGAACCCAAACCTGTTGTGA 1287
|||||
Sbjct 1 ATGTTAATCAAGGAACAGCCGGTAGTGCATTGGTGGTGTATGAACCCAAACCTGTTGTGA 60

Query 1288 CATATGACTCAAAGTTAGAATTTGGAGCATTTACCAATTTACCACATGTATTGATGAATT 1347
|||||
Sbjct 61 CATATGACTCAAAGTTAGAATTTGGAGCGTTTACCAATTTACCACATGTGTTGATGAATT 120

Query 1348 TGGCTGAGACCACACAGGCTGATTTATGTATCCCCTATGTTGCTGACACAAACTATGTTA 1407
|||||
Sbjct 121 TGGCTGAGACCACACAGGCTGATTTATGTATCCCCTATGTTGCTGACACAAACTATGTTA 180

Query 1408 AAACGGATTCGTCAGACTTAGGGCAACTAAAAGTCTATGTTTGGACACCTTTATCTATAC 1467
|||||
Sbjct 181 AAACAGATTCGTCAGACTTAGGGCAACTAAAAGTCTATGTTTGGACACCTTTATCCATAC 240

Query 1468 CTTCAGGTTCT 1478
|||||
Sbjct 241 CTTCAGGTTCT 251
```

Score = 392 bits (212), Expect = 9e-105  
Identities = 238/251 (95%), Gaps = 0/251 (0%)  
Strand=Plus/Minus

```
Query 1381 CCTATGTTGCTGACACAAACTATGTTAAAACGGATTCGTCAGACTTAGGGCAACTAAAAG 1440
```

```

Sbjct 500      |||
CCTATGTTGCTGACACAAACTATGTTAAAAACAGATTCGTCAGACTTAGGGCAACTAAAAG 441
Query 1441    TCTATGTTTGGACACCTTTATCTATACCTTCAGGTTCTGCGACACAAGTTGATGTAACCA 1500
|||
Sbjct 440      TCTATGTTTGGACACCTTTATCCATACCTTCAGGTTCTGCTACACAAGTTGATGTTACCA 381
Query 1501    TATTGGGTAGTTTATTGCAATTGGACTTCCAAAATCCTAGGGTGTGGCCAAGACGTTG 1560
|||
Sbjct 380      TATTGGGTAGTTTATTGCAATTGGACTTCCAAAATCCTAGGGTATTCGGTCAAGACGTTG 321
Query 1561    GTATCTATGATAATGCACCAACGCGGAAACAAAATCTTAAAAAGATTCTTACAATGAGCA 1620
|||
Sbjct 320      GTATTTATGACAATGCACCAACGCGGAAACAAAATCTTAAAGAAAATCTTACAATGAGCA 261
Query 1621    CTAATAACAAG 1631
|||
Sbjct 260      CTAAACACAAG 250

```

>SRR2298546.191934 191934 length=501  
Length=501

Score = 431 bits (233), Expect = 2e-116  
Identities = 243/248 (98%), Gaps = 0/248 (0%)  
Strand=Plus/Plus

```

Query 1248    GGTAGTGCATTGGTGGTGTATGAACCCAAAACCTGTTGTGACATATGACTCAAAGTTAGAA 1307
|||
Sbjct 1        GGTAGTGCATTGGTGGTGTATGAACCCAAAACCTGTTGTGACATATGACTCAAAGTTAGAA 60
Query 1308    TTTGGAGCATTTACCAATTTACCACATGTATTGATGAATTTGGCTGAGACCACACAGGCT 1367
|||
Sbjct 61      TTTGGAGCGTTTACCAATTTACCACATGTGTTGATGAATTTGGCTGAGACCACACAGGCT 120
Query 1368    GATTTATGTATCCCCTATGTTGCTGACACAAACTATGTTAAAAACGGATTCGTCAGACTTA 1427
|||
Sbjct 121     GATTTATGTATCCCCTATGTTGCTGACACAAACTATGTTAAAAACAGATTCGTCAGACTTA 180
Query 1428    GGGCAACTAAAAGTCTATGTTTGGACACCTTTATCTATACCTTCAGGTTCTGCGACACAA 1487
|||
Sbjct 181     GGGCAACTAAAAGTCTATGTTTGGACACCTTTATCCATACCTTCAGGTTCTGCTACACAA 240
Query 1488    GTTGATGT 1495
|||
Sbjct 241     GTTGATGT 248

```

Score = 401 bits (217), Expect = 2e-107  
Identities = 239/250 (96%), Gaps = 0/250 (0%)  
Strand=Plus/Minus

```

Query 1465    TACCTTCAGGTTCTGCGACACAAGTTGATGTAACCATATTGGGTAGTTTATTGCAATTGG 1524
|||
Sbjct 500      TACCTTCAGGTTCTGCTACACAAGTTGATGTTACCATATTGGGTAGCTTATTGCAATTGG 441
Query 1525    ACTTCCAAAATCCTAGGGTGTGGCCAAGACGTTGGTATCTATGATAATGCACCAACGC 1584
|||
Sbjct 440      ACTTCCAAAATCCTAGGGTATTCGGTCAAGACGTTGGTATTTATGACAATGCACCAACGC 381

```

```

Query  1585  GGAAACAAAATCTTAAAAAGATTCTTACAATGAGCACTAAAATACAAGTGGACTAGGGGAA  1644
      |||||
Sbjct  380    GGAAGCAAAAATCTTAAAGAAAATCTTACAATGAGCACTAAAATACAAGTGGACTAGGGGAA  321

Query  1645  AAATTGACATTGCAGAAGGGCCAGGTTCTATGAACATGGCGAACGTATTGAGTACCACTG  1704
      |||||
Sbjct  320    AAATTGACATTGCAGAAGGGCCAGGTTCTATGAACATGGCGAACGTATTGAGTACCACTG  261

Query  1705  CAGCGCAATC  1714
      |||||
Sbjct  260    CAGCGCAATC  251

```

>SRR2298546.179038 179038 length=501

Length=501

Score = 431 bits (233), Expect = 2e-116  
 Identities = 245/251 (98%), Gaps = 0/251 (0%)  
 Strand=Plus/Minus

```

Query  1230  GTTAACCAAGGAACAGCTGGTAGTGCATTGGTGGTGTATGAACCCAAACCTGTTGTGACA  1289
      |||||
Sbjct  251    GTTAATCAAGGAACAGCCGGTAGTGCATTGGTGGTGTATGAACCCAAACCTGTTGTGACA  192

Query  1290  TATGACTCAAAGTTAGAATTTGGAGCATTTACCAATTTACCACATGTATTGATGAATTTG  1349
      |||||
Sbjct  191    TATGACTCAAAGTTAGAATTTGGAGCGTTTACCAATTTACCACATGTGTTGATGAATTTG  132

Query  1350  GCTGAGACCACACAGGCTGATTTATGTATCCCCTATGTTGCTGACACAAACTATGTTAAA  1409
      |||||
Sbjct  131    GCTGAGACCACACAGGCTGATTTATGTATCCCCTATGTTGCTGACACAAACTATGTTAAA  72

Query  1410  ACGGATTCGTCAGACTTAGGGCAACTAAAAGTCTATGTTTGGACACCTTTATCTATACCT  1469
      ||
Sbjct  71    ACAGATTCGTCAGACTTAGGGCAACTAAAAGTCTATGTTTGGACACCTTTATCCATACCT  12

Query  1470  TCAGGTTCTGC  1480
      |||||
Sbjct  11    TCAGGTTCTGC  1

```

Score = 420 bits (227), Expect = 4e-113  
 Identities = 243/251 (97%), Gaps = 0/251 (0%)  
 Strand=Plus/Plus

```

Query  1183  ACTTTGCAGCAGTACGGTGTGGCTTTTCATTTTCAGGTGCAAGTGAATGTTAACCAAGGAA  1242
      |||||
Sbjct  250    ACTTTGCAGCAGTACGGTGTGGTTTTCATTTTCAGGTGCAAGTGAATGTTAATCAAGGAA  309

Query  1243  CAGCTGGTAGTGCATTGGTGGTGTATGAACCCAAACCTGTTGTGACATATGACTCAAAGT  1302
      |||||
Sbjct  310    CAGCCGGTAGTGCATTGGTGGTGTATGAACCCAAACCTGTTGTGACATATGACTCAAAGT  369

Query  1303  TAGAATTTGGAGCATTTACCAATTTACCACATGTATTGATGAATTTGGCTGAGACCACAC  1362
      |||||
Sbjct  370    TAGAATTTGGAGCGTTTACCAATTTACCACATGTGTTGATGAATTTGGCTGAGACCACAC  429

Query  1363  AGGCTGATTTATGTATCCCCTATGTTGCTGACACAAACTATGTTAAAACGGATTTCGTCAG  1422

```

```

Sbjct 430      |||||||||||||||||||||||||||||||||||||||||||||||||||||||||||
AGGCTGATTTATGTATCCCCTATGTTGCTGACACAAACTATGTTAAAAACAGATTCGTCAG 489

Query 1423  ACTTAGGGCAA 1433
||||||||||
Sbjct 490  ACTTAGGGCAA 500

```

>SRR2298546.106566 106566 length=502  
Length=502

Score = 431 bits (233), Expect = 2e-116  
Identities = 245/251 (98%), Gaps = 0/251 (0%)  
Strand=Plus/Minus

```

Query 1258  TGGTGGTGTATGAACCCAAACCTGTTGTGACATATGACTCAAAGTTAGAATTTGGAGCAT 1317
|||||||||||||||||||||||||||||||||||||||||||||||||||||||||||
Sbjct 502  TGGTGGTGTATGAACCCAAACCTGTTGTGACATATGACTCAAAGTTAGAATTTGGAGCGT 443

Query 1318  TTACCAATTTACCACATGTATTGATGAATTTGGCTGAGACCACACAGGCTGATTTATGTA 1377
|||||||||||||||||||||||||||||||||||||||||||||||||||||||||||
Sbjct 442  TTACCAATTTACCACATGTGTTGATGAATTTGGCTGAGACCACACAGGCTGATTTATGTA 383

Query 1378  TCCCCTATGTTGCTGACACAAACTATGTTAAAAACGGATTCGTCAGACTTAGGGCAACTAA 1437
|||||||||||||||||||||||||||||||||||||||||||||||||||||||||||
Sbjct 382  TCCCCTATGTTGCTGACACAAACTATGTTAAAAACAGATTCGTCAGACTTAGGGCAACTAA 323

Query 1438  AAGTCTATGTTTGGACACCTTTATCTATACCTTCAGGTTCTGCGACACAAGTTGATGTAA 1497
|||||||||||||||||||||||||||||||||||||||||||||||||||||||||||
Sbjct 322  AAGTCTATGTTTGGACACCTTTATCCATACCTTCAGGTTCTGCTACACAAGTTGATGTAA 263

Query 1498  CCATATTGGGT 1508
||||||||||
Sbjct 262  CCATATTGGGT 252

```

Score = 414 bits (224), Expect = 2e-111  
Identities = 244/254 (96%), Gaps = 0/254 (0%)  
Strand=Plus/Plus

```

Query 1105  GACATCAGATAACCCATGTGGAATTGCCAAAAGTCTTTTGGGACAAAAACAGTAAGCCAG 1164
|||||||||||||||||||||||||||||||||||||||||||||||||||||||||||
Sbjct 1  GACATCAGATAACCCATGTGGAATACCAAAAAGTCTTTTGGGACAAAAACAGCAAGCCAG 60

Query 1165  CCTATGGCCAATCAAGATACTTTGCAGCAGTACGGTGTGGCTTTTCATTTTCAGGTGCAAG 1224
|||||||||||||||||||||||||||||||||||||||||||||||||||||||||||
Sbjct 61  CCTATGGCCAATCAAGATACTTTGCAGCAGTACGGTGTGGTTTTCATTTTCAGGTACAAG 120

Query 1225  TGAATGTTAACCAAGGAACAGCTGGTAGTGCATTGGTGGTGTATGAACCCAAACCTGTTG 1284
|||||||||| |||||||||| |||||||||| |||||||||| |||||||||| ||||||||||
Sbjct 121  TGAATGTTAATCAAGGAACAGCCGGTAGTGCATTGGTGGTGTATGAACCCAAACCTGTTG 180

Query 1285  TGACATATGACTCAAAGTTAGAATTTGGAGCATTTACCAATTTACCACATGTATTGATGA 1344
|||||||||||||||||||||||||||||||||||||||||||||||||||||||||||
Sbjct 181  TGACATATGACTCAAAGTTAGAATTTGGAGCGTTTACCAATTTACCACATGTGTTGATGA 240

Query 1345  ATTTGGCTGAGACC 1358
||||||||||||||
Sbjct 241  ATTTGGCTGAGACC 254

```

>SRR2298382.118509 118509 length=500  
Length=500

Score = 431 bits (233), Expect = 2e-116  
Identities = 248/255 (97%), Gaps = 1/255 (0%)  
Strand=Plus/Plus

```
Query 433 TCTGGGGCCAAAAGCCAAGGTCTAACAAACCCTTTAGGATTGGTTCTAAACCTGAGATGT 492
          |||
Sbjct 1 TCTGGGGCCAAAAGCCAAGGTCTAACAAACCCTTTAGGATTGGTTCTAAACCTGAGATGT 60

Query 493 TGTGGAAGATACTTAGTACCTGCCGATCTGGTAGTACTGCAAACACTAGTTGTAAGGCC 552
          |||
Sbjct 61 TGTGGAAGATACTTAGTACCTACCGATCTGGTAGTAGTGCAAACACTAGTTGTAAGGCC 120

Query 553 ACGAAGGATGCCCAGAAGGTACCCATAGGTAACAAGTGACACTATGGATCTGATCTGGGG 612
          |||
Sbjct 121 ACGAAGGATGCCCAGAAGGTACCCATAGGTAACAAGCGACACTATGGATCTGATCTGGGG 180

Query 613 CCAGGTACCTCTATCTTGGTGACCTGGTTAAAAAGCGTCTAGTGGGCCAAAACCCgggggg 672
          |||
Sbjct 181 CCAGGTACCTCTATCTTGGTGATCTGGTTAAAAAACGTCTAGTGGGCCAAAACCCGGGGG 240

Query 673 gATCCCCGG-TTTCC 686
          |||
Sbjct 241 GATCCCCGGATTTCC 255
```

Score = 418 bits (226), Expect = 2e-112  
Identities = 242/250 (97%), Gaps = 0/250 (0%)  
Strand=Plus/Minus

```
Query 549 GCCCACGAAGGATGCCCAGAAGGTACCCATAGGTAACAAGTGACACTATGGATCTGATCT 608
          |||
Sbjct 500 GCCCACGAAGGATGCCCAGAAGGTACCCATAGGTAACAAGCGACACTATGGATCTGATCT 441

Query 609 GGGGCCAGGTACCTCTATCTTGGTGACCTGGTTAAAAAGCGTCTAGTGGGCCAAAACCCgg 668
          |||
Sbjct 440 GGGGCCAGGTACCTCTATCTTGGTGATCTGGTTAAAAAACGTCTAGTGGGCCAAAACCCGG 381

Query 669 gggggATCCCCGGTTTCCTTTTATTTTATCAATGCTACAATGGAGACAATTAAAAGTATT 728
          |||
Sbjct 380 GGGGGATCCCCGGTTTCCTTTTATTTTATCAATGCCACTATGGAGACAATTAAAGAGTATT 321

Query 729 GCAGATATGGCGACCGGAGTGGTCAGTTCAGTTGATTCCACTATCAATGCAGTTAATGAG 788
          |||
Sbjct 320 GCAGATATGGCGACCGGAGTGGTCAGTTCAGTTGATTCCACTATCAATGTAGTTAATGAG 261

Query 789 AGAGTAGAAA 798
          |||
Sbjct 260 AGAGTGAAAA 251
```

>SRR2298382.107523 107523 length=502  
Length=502

Score = 431 bits (233), Expect = 2e-116



Identities = 245/251 (98%), Gaps = 0/251 (0%)  
Strand=Plus/Plus

```
Query 417 CCTGGTAACAGGTGCCTCTGGGGCCAAAAGCCAAGGTCTAACAAACCCCTTTAGGATTGGT 476
          |||
Sbjct 1 CCTGGTAACAGGTGCCTCTGGGGCCAAAAGCCAAGGTCTAACAAACCCCTTTAGGATTGGT 60

Query 477 TCTAAACCTGAGATGTTGTGGAAGATACTTAGTACCTGCCGATCTGGTAGTACTGCAAAC 536
          |||
Sbjct 61 TCTAAACCTGAGATGTTGTGGAAGATACTTAGTACCTACCGATCTGGTAGTAGTGCAAAC 120

Query 537 ACTAGTTGTAAGGCCACGAAGGATGCCCAGAAGGTACCCATAGGTAACAAGTGACACTA 596
          |||
Sbjct 121 ACTAGTTGTAAGGCCACGAAGGATGCCCAGAAGGTACCCATAGGTAACAAGCGACACTA 180

Query 597 TGGATCTGATCTGGGGCCAGGTACCTCTATCTTGGTGACCTGGTTAAAAAGCGTCTAGTG 656
          |||
Sbjct 181 TGGATCTGATCTGGGGCCAGGTACCTCTATCTTGGTGATCTGGTTAAAAAACGTCCTAGTG 240

Query 657 GGCCAAACCCg 667
          |||
Sbjct 241 GGCCAAACCCG 251
```

Score = 414 bits (224), Expect = 2e-111  
Identities = 242/251 (96%), Gaps = 0/251 (0%)  
Strand=Plus/Minus

```
Query 538 CTAGTTGTAAGGCCACGAAGGATGCCCAGAAGGTACCCATAGGTAACAAGTGACACTAT 597
          |||
Sbjct 502 CTAGTTGTAAGGCCACGAAGGATGCCCAGAAGGTACCCATAGGTAACAAGCGACACTAT 443

Query 598 GGATCTGATCTGGGGCCAGGTACCTCTATCTTGGTGACCTGGTTAAAAAGCGTCTAGTGG 657
          |||
Sbjct 442 GGATCTGATCTGGGGCCAGGTACCTCTATCTTGGTGATCTGGTTAAAAAACGTCCTAGTGG 383

Query 658 GCCAAACCCgggggggATCCCCGGTTTCCTTTTATTTTATCAATGCTACAATGGAGACAA 717
          |||
Sbjct 382 GCCAAACCCGGGGGGGATCCCCGGTTTCCTGTTATTTTATCAATGCCACTATGGAGACAA 323

Query 718 TTTAAAAGTATTGCAGATATGGCGACCGGAGTGGTCAGTTCAGTTGATTCCAATATCAATG 777
          |||
Sbjct 322 TTAAGAGTATTGCAGATATGGCGACCGGAGTGGTCAGTTCAGTTGATTCCAATATCAATG 263

Query 778 CAGTTAATGAG 788
          |||
Sbjct 262 TAGTTAATGAG 252
```

>SRR2298382.63975 63975 length=502  
Length=502

Score = 431 bits (233), Expect = 2e-116  
Identities = 245/251 (98%), Gaps = 0/251 (0%)  
Strand=Plus/Plus

```
Query 327 CTAGTAAGTTTGTGAGACGTCTGGTGACGTGTGGGAACTTATTGGAAGCAACATTTTGCT 386
          |||
Sbjct 1 CTAGTAAGTTTGTGAGACGTCTGGTGACGTGTGGGAACTTATTGGAACAACATTTTGCT 60
```



```

Sbjct 121      ||||||||||||||||||||||||||||||||||||||||||||||||||||||| 180
                TGATTTATGTATCCCCTATGTTGCTGACACAAACTATGTTAAAAACAGATTCGTCAGACTT
Query 1427     AGGGCAACTAAAAGTCTATGTTTGGACACCTTTATCTATACCTTCAGGTTCTGCGACACA 1486
                |||||||||||||||||||||||||||||||||||||||||||||||||||||||
Sbjct 181      AGGGCAACTAAAAGTCTATGTTTGGACACCTTTATCCATACCTTCAGGTTCTGCTACACA 240
Query 1487     AGTTGATGTA 1496
                |||||||||||
Sbjct 241      AGTTGATGTA 250

```

Score = 353 bits (191), Expect = 4e-93  
Identities = 231/251 (92%), Gaps = 0/251 (0%)  
Strand=Plus/Minus

```

Query 1382     CTATGTTGCTGACACAAACTATGTTAAAAACGGATTCGTCAGACTTAGGGCAACTAAAAGT 1441
                ||||||| ||||| ||||| | ||||||||| | ||| |||||||||||||||||||
Sbjct 500      CTATGTTTCTGACCCAAATTTTGTAAAAACCGTTTCCTCAGACTTAGGGCAACTAAAAGT 441
Query 1442     CTATGTTTGGACACCTTTATCTATACCTTCAGGTTCTGCGACACAAGTTGATGTAACCAT 1501
                ||||||||||||||||||| ||||||||||| ||||||||||| |||||||||||
Sbjct 440      TTATGTTTGGACACCTTTATCCATACCTTCAGGTTCTGCTACACAAGTTGATGTAACCAT 381
Query 1502     ATTGGGTAGTTTATTGCAATTGGACTTCCAAAATCCTAGGGTGTGTTGGCCAAGACGTTGG 1561
                ||||||||| ||||||||| ||||||||| ||||||||| || ||||| |||||||||
Sbjct 380      ATTGGGTAGCTTATTGCAATTGGACTTCCAAAACCTAGGGTATTTCGGCCAGGACGTTGG 321
Query 1562     TATCTATGATAATGCACCAACGCGGAAAACAAAATCTTAAAAAGATTCTTACAATGAGCAC 1621
                ||| ||||| ||||||||||||||||||| ||||||||| ||||| |||||||||||
Sbjct 320      TATTTATGACAATGCACCAACGCGGAAGCAAAAATCTAAAAAAAATCTTACAATGAGCAC 261
Query 1622     TAAATACAAGT 1632
                |||||||||||
Sbjct 260      TAAATACAAGT 250

```

>SRR2298578.248012 248012 length=500  
Length=500

Score = 429 bits (232), Expect = 7e-116  
Identities = 255/266 (96%), Gaps = 2/266 (1%)  
Strand=Plus/Plus

```

Query 1284     GTGACATATGACTCAAAGTTAGAATTTGGAGCATTACCAATTTACCACATGTATTGATG 1343
                |||||||||||||||||||||||||||||||||||||||||||||||||||||||
Sbjct 1        GTGACATATGACTCAAAGTTAGAATTTGGAGCATTACCAATCTACCACATGTGTTGATG 60
Query 1344     AATTTGGCTGAGACCACACAGGCTGATTTATGTATCCCCTATGTTGCTGACACAAACTAT 1403
                ||||||||||||||||||| ||||||||||| ||||||||||| |||||||||||
Sbjct 61      AATTTGGCTGAGACCACACAGGCTGATTTATGTATCCCCTATGTTGTTGACACAAACTAT 120
Query 1404     GTTAAAAACGGATTCGTCAGACTTAGGGCAACTAAAAGTCTATGTTTGGACACCTTTATCT 1463
                ||||||||| ||||||||| ||||||||| ||||||||| ||||||||| |||||||||
Sbjct 121     GTTAAAAACAGATTCGTCAGACTTAGGGCAACTAAAAGTCTATGTTTGGACACCTTTATCC 180
Query 1464     ATACCTTCAGGTTCTGCGACACAAGTTGATGTAACCATATTTGGGTAGTTTATTGCAATTG 1523
                ||||||||| ||||||||| ||||||||| ||||||||| ||||||||| |||||||||
Sbjct 181     ATACCTTCAGGTTCTGCTACACAAGTTGATGTAACCAAATTTGGGTAGCTTATTGCAATTG 240

```

Query 1524 GACTTCCAAAATCCTAGGGTGTGG 1549  
|||||  
Sbjct 241 GACTTCCAAAC-CCTAGGGT-TTTGG 264

Score = 407 bits (220), Expect = 3e-109  
Identities = 240/250 (96%), Gaps = 0/250 (0%)  
Strand=Plus/Minus

Query 1294 ACTCAAAGTTAGAATTTGGAGCATTACCAATTTACCACATGTATTGATGAATTTGGCTG 1353  
|||||  
Sbjct 499 ACTCAAAGTTAGAATTTGGACCATTACCAATCTACCACATGTTTGGATGAATTTGGCTG 440

Query 1354 AGACCACACAGGCTGATTTATGTATCCCCTATGTTGCTGACACAAACTATGTTAAAACGG 1413  
|||||  
Sbjct 439 AGACCACACAGGCTGATTTATGTATCCCCTATGTTTGGACACAAACTATGTTAAAACAG 380

Query 1414 ATTCGTCAGACTTAGGGCAACTAAAAGTCTATGTTTGGACACCTTTATCTATACCTTCAG 1473  
|||||  
Sbjct 379 ATTCGTCAGACTTAGGGCAACTAAAAGTCTATGTTTGGACACCTTTATCCATACCTTCAG 320

Query 1474 GTTCTGCGACACAAGTTGATGTAACCATATTGGGTAGTTTATTGCAATTGGACTTCCAAA 1533  
|||||  
Sbjct 319 GTTCTGCTACACAAGTTGATGTAACCATATTGGGTAGCTTATTGCAATTGGACTTCCAAA 260

Query 1534 ATCCTAGGGT 1543  
|  
Sbjct 259 ACCCTAGGGT 250

>SRR2298573.878601 878601 length=500  
Length=500

Score = 429 bits (232), Expect = 7e-116  
Identities = 244/250 (98%), Gaps = 0/250 (0%)  
Strand=Plus/Minus

Query 348 TGGTGACGTGTGGGAACCTTATTGGAAGCAACATTTTGCTGCAAAGCATCCTATTGCCAGC 407  
|||||  
Sbjct 500 TGGTGACGTGTGGGAACCTTATTGGAACAACATTTTGCTGTAAAGCATCCTATTGCCAGC 441

Query 408 GGAACAACACCTGGTAACAGGTGCCCTCTGGGGCCAAAAGCCAAGGTCTAACAAACCTTT 467  
|||||  
Sbjct 440 GGAACAACACCTGGTAACAGGTGCCCTCTGGGGCCAAAAGCCAAGGTCTAACAAACCTTT 381

Query 468 AGGATTGGTTCTAAACCTGAGATGTTGTGGAAGATACTTAGTACCTGCCGATCTGGTAGT 527  
|||||  
Sbjct 380 AGGATTGGTTCTAAACCTGAGATGTTGTGGAAGATACTTAGTACCTACCGATCTGGTAGT 321

Query 528 ACTGCAAACACTAGTTGTAAGGCCACGAAGGATGCCAGAAAGGTACCCATAGGTAACAA 587  
|  
Sbjct 320 AGTCAAACACTAGTTGTAAGGCCACGAAGGATGCCAGAAAGGTACCCATAGGTAACAA 261

Query 588 GTGACACTAT 597  
|  
Sbjct 260 GCGACACTAT 251

Score = 387 bits (209), Expect = 4e-103  
Identities = 223/230 (97%), Gaps = 0/230 (0%)  
Strand=Plus/Plus

```
Query 276 TCTACTAGTGAGATACCACGCTTGTGGACCTTATGCTCACACAGCCATCCTCTAGTAAGT 335
|||||
Sbjct 2 TCTATTAGTGAGATACCATGCTTGTGGACCTTATGCTCACACAGCCATCCTCTAGTAAGT 61

Query 336 TTGTGAGACGTCTGGTGACGTGTGGGAACTTATTGGAAGCAACATTTTGCTGCAAAGCAT 395
|||||
Sbjct 62 TTGTGAGACGTCTGGTGACGTGTGGGAACTTATTGGAACAACATTTTGCTGTAAAGCAT 121

Query 396 CCTATTGCCAGCGGAACAACACCTGGTAACAGGTGCCTCTGGGGCCAAAAGCCAAGGTCT 455
|||||
Sbjct 122 CCTATTGCCAGCGGAACAACACCTGGTAACAGGTGCCTCTGGGGCCAAAAGCCAAGGTTT 181

Query 456 AACAAACCCTTTAGGATTGGTTCTAAACCTGAGATGTTGTGGAAGATACT 505
|||||
Sbjct 182 AACAAACCCTTTAGGATTGGTTCTAAACCTTAGATGTTGTGGAAGAAACT 231
```

>SRR2298573.877679 877679 length=500  
Length=500

Score = 429 bits (232), Expect = 7e-116  
Identities = 244/250 (98%), Gaps = 0/250 (0%)  
Strand=Plus/Plus

```
Query 462 CCCTTTAGGATTGGTTCTAAACCTGAGATGTTGTGGAAGATACTTAGTACCTGCCGATCT 521
|||||
Sbjct 1 CCCTTTAGGATTGGTTCTAAACCTGAGATGTTGTGGAAGATACTTAGTACCTGCCGATCT 60

Query 522 GGTAGTACTGCAAACACTAGTTGTAAGGCCACGAAGGATGCCCAGAAGGTACCCATAGG 581
|||||
Sbjct 61 GGTAGTACTGCAAACACTAGTTGTAAGGCCACGAAGGATGCCCAGAAGGTACCCATAGG 120

Query 582 TAACAAGTGACACTATGGATCTGATCTGGGGCCAGGTACCTCTATCTTGGTGACCTGGTT 641
|||||
Sbjct 121 TAACAAGCGACACTATGGATCTGATCTGGGGCCAGGTACCTCTATCTTGGTGATCTGGTT 180

Query 642 AAAAAAGCGTCTAGTGGGCCAAACCCgggggggATCCCCGGTTTCCTTTTATTTTATCAAT 701
|||||
Sbjct 181 AAAAAACGTCTAGTGGGCCAAACCCGGGGGGGATCCCCGGTTTCCTTTTATTTTATCAAT 240

Query 702 GCTACAATGG 711
|| || ||||
Sbjct 241 GCCACTATGG 250
```

Score = 370 bits (200), Expect = 4e-98  
Identities = 230/245 (94%), Gaps = 0/245 (0%)  
Strand=Plus/Minus

```
Query 480 AAACCTGAGATGTTGTGGAAGATACTTAGTACCTGCCGATCTGGTAGTACTGCAAACACT 539
|||||
Sbjct 495 AAACCTGGGGTGTGTTGGGAAGGTACTTAGTACCTTCCGATCTGGTAGTACTGCAAACCT 436

Query 540 AGTTGTAAGGCCACGAAGGATGCCCAGAAGGTACCCATAGGTAACAAGTGACACTATGG 599
|||||
```

```

Sbjct 435 AGTTGTAAGGCCACGAAGGATGCCAGAAAGGTACCCATAGGTAACAAGCGACCCTATGG 376
Query 600 ATCTGATCTGGGGCCAGGTACCTCTATCTTGGTGACCTGGTTAAAAAGCGTCTAGTGGGC 659
      |||
Sbjct 375 ATCTGATCTGGGGCCAGGTACCTCTATCTTGGTGATCTGGTTAAAAACGTCTAGTGGGC 316
Query 660 CAAACCCgggggggATCCCGGTTTCCTTTTATTTTATCAATGCTACAATGGAGACAATT 719
      |||
Sbjct 315 CAAACCCGGGGGGGATCCCGGTTTCCTTTTATTTTATCAATGCCACTATGGAGACAATT 256
Query 720 AAAAG 724
      ||
Sbjct 255 AAGAG 251

```

>SRR2298573.870403 870403 length=500  
Length=500

Score = 429 bits (232), Expect = 7e-116  
Identities = 244/250 (98%), Gaps = 0/250 (0%)  
Strand=Plus/Minus

```

Query 397 CTATTGCCAGCGGAACAACACCTGGTAACAGGTGCCTCTGGGGCCAAAAGCCAAGGTCTA 456
      |||
Sbjct 500 CTATTGCCAGCGGAACAACCCCTGGTAACAGGTGCCTCTGGGGCCAAAAGCCAAGGTTTA 441
Query 457 ACAAAACCCTTTAGGATTGGTTCTAAACCTGAGATGTTGTGGAAGATACTTAGTACCTGCC 516
      |||
Sbjct 440 ACAAAACCCTTTAGGATTGGTTCTAAACCTGAGATGTTGTGGAAGATACTTAGTACCTACC 381
Query 517 GATCTGGTAGTACTGCAAACACTAGTTGTAAGGCCACGAAGGATGCCAGAAAGGTACCC 576
      |||
Sbjct 380 GATCTGGTAGTAGTGCAAACACTAGTTGTAAGGCCACGAAGGATGCCAGAAAGGTACCC 321
Query 577 ATAGGTAACAAGTGACACTATGGATCTGATCTGGGGCCAGGTACCTCTATCTTGGTGACC 636
      |||
Sbjct 320 ATAGGTAACAAGCGACACTATGGATCTGATCTGGGGCCAGGTACCTCTATCTTGGTGATC 261
Query 637 TGGTTAAAAA 646
      |||
Sbjct 260 TGGTTAAAAA 251

```

Score = 425 bits (230), Expect = 9e-115  
Identities = 240/245 (98%), Gaps = 0/245 (0%)  
Strand=Plus/Plus

```

Query 344 CGTCTGGTGACGTGTGGGAACTTATTGGAAGCAACATTTTGCTGCAAAGCATCCTATTGC 403
      |||
Sbjct 1 CGTCTGGTGACGTGTGGGAACTTATTGGAACAACATTTTGCTGTAAAGCATCCTATTGC 60
Query 404 CAGCGGAACAACACCTGGTAACAGGTGCCTCTGGGGCCAAAAGCCAAGGTCTAACAAACC 463
      |||
Sbjct 61 CAGCGGAACAACACCTGGTAACAGGTGCCTCTGGGGCCAAAAGCCAAGGTTTAAACAAACC 120
Query 464 CTTTAGGATTGGTTCTAAACCTGAGATGTTGTGGAAGATACTTAGTACCTGCCGATCTGG 523
      |||
Sbjct 121 CTTTAGGATTGGTTCTAAACCTGAGATGTTGTGGAAGATACTTAGTACCTACCGATCTGG 180

```

```

Query 524 TAGTACTGCAAACACTAGTTGTAAGGCCACGAAGGATGCCCAGAAGGTACCCATAGGTA 583
      |||
Sbjct 181 TAGTAGTGCAAACACTAGTTGTAAGGCCACGAAGGATGCCCAGAAGGTACCCATAGGTA 240

Query 584 ACAAG 588
      |||
Sbjct 241 ACAAG 245

```

>SRR2298573.865355 865355 length=500  
Length=500

Score = 429 bits (232), Expect = 7e-116  
Identities = 244/250 (98%), Gaps = 0/250 (0%)  
Strand=Plus/Plus

```

Query 332 AAGTTTGTGAGACGTCTGGTGACGTGTGGGAACCTTATTGGAAGCAACATTTTGCTGCAAA 391
      |||
Sbjct 251 AAGTTTGTGAGACGTCTGGTGACGTGTGGGAACCTTATTGGAACAACATTTTGCTGTAAA 310

Query 392 GCATCCTATTGCCAGCGGAACAACACCTGGTAACAGGTGCCTCTGGGGCCAAAAGCCAAG 451
      |||
Sbjct 311 GCATCCTATTGCCAGCGGAACAACACCTGGTAACAGGTGCCTCTGGGGCCAAAAGCCAAG 370

Query 452 GTCTAACAAACCCTTTAGGATTGGTTCTAAACCTGAGATGTTGTGGAAGATACTTAGTAC 511
      |||
Sbjct 371 GTTTAACAAACCCTTTAGGATTGGTTCTAAACCTGAGATGTTGTGGAAGATACTTAGTAC 430

Query 512 CTGCCGATCTGGTAGTACTGCAAACACTAGTTGTAAGGCCACGAAGGATGCCCAGAAGG 571
      |||
Sbjct 431 CTACCGATCTGGTAGTACTGCAAACACTAGTTGTAAGGCCACGAAGGATGCCCCGAAGG 490

Query 572 TACCCATAGG 581
      |||
Sbjct 491 TACCCATAGG 500

```

Score = 374 bits (202), Expect = 3e-99  
Identities = 228/241 (95%), Gaps = 0/241 (0%)  
Strand=Plus/Minus

```

Query 475 GTTCTAAACCTGAGATGTTGTGGAAGATACTTAGTACCTGCCGATCTGGTAGTACTGCAA 534
      |||
Sbjct 249 GTTCCAAACCTGAAATTTTGGGGAAGATTCTTAGTACCTACCGATCTGGTAGTAATGCAA 190

Query 535 ACACTAGTTGTAAGGCCACGAAGGATGCCCAGAAGGTACCCATAGGTAACAAGTGACAC 594
      |||
Sbjct 189 ACTCTAGTTGTAAGGCCACGAAGGATGCCCAGAAGGTACCCATAGGTAACAAGCGACAC 130

Query 595 TATGGATCTGATCTGGGGCCAGGTACCTCTATCTTGGTGACCTGGTTAAAAAGCGTCTAG 654
      |||
Sbjct 129 TATGGATCTGATCTGGGGCCAGGTACCTCTATCTTGGTGATCTGGTTAAAAACGCTCTAG 70

Query 655 TGGGCCAAACCCgggggggATCCCCGGTTTCCTTTTATTTTATCAATGCTACAATGGAGA 714
      |||
Sbjct 69 TGGGCCAAACCCGGGGGGGATCCCCGGTTTCCTTTTATTTTATCAATGCCACTATGGAGA 10

Query 715 C 715
      |

```

Sbjct 9 C 9

>SRR2298573.855147 855147 length=500  
Length=500

Score = 429 bits (232), Expect = 7e-116  
Identities = 244/250 (98%), Gaps = 0/250 (0%)  
Strand=Plus/Plus

```
Query 412 CAACACCTGGTAACAGGTGCCTCTGGGGCCAAAAGCCAAGGTCTAACAAACCCCTTTAGGA 471
          |||
Sbjct 1 CAACACCTGGTAACAGGTGCCTCTGGGGCCAAAAGCCAAGGTTAACAAACCCCTTTAGGA 60

Query 472 TTGGTTCTAAACCTGAGATGTTGTGGAAGATACTTAGTACCTGCCGATCTGGTAGTACTG 531
          |||
Sbjct 61 TTGGTTCTAAACCTGAGATGTTGTGGAAGATACTTAGTACCTACCGATCTGGTAGTACTG 120

Query 532 CAAACACTAGTTGTAAGGCCACGAAGGATGCCCAGAAGGTACCCATAGGTAACAAGTGA 591
          |||
Sbjct 121 CAAACACTAGTTGTAAGGCCACGAAGGATGCCCAGAAGGTACCCATAGGTAACAAGCGA 180

Query 592 CACTATGGATCTGATCTGGGGCCAGGTACCTCTATCTTGGTGACCTGGTTAAAAAGCGTC 651
          |||
Sbjct 181 CACTATGGATCTGATCTGGGGCCAGGTACCTCTATCTTGGTGATCTGGTTAAAAAACGTC 240

Query 652 TAGTGGGCCA 661
          |||
Sbjct 241 TAGTGGGCCA 250
```

Score = 405 bits (219), Expect = 1e-108  
Identities = 239/249 (96%), Gaps = 0/249 (0%)  
Strand=Plus/Minus

```
Query 462 CCCTTTAGGATTGGTTCTAAACCTGAGATGTTGTGGAAGATACTTAGTACCTGCCGATCT 521
          |||
Sbjct 499 CCCTTTAGGATTGGTTCTAAACCTGAGATGTTGTGGAAGATACTTAGTTCCTACCGATCT 440

Query 522 GGTTAGTACTGCAAACACTAGTTGTAAGGCCACGAAGGATGCCCAGAAGGTACCCATAGG 581
          |||
Sbjct 439 GGTGTAGTGCAAACCTAGTTGTAAGGCCACGAAGGATGCCCAGAAGGTACCCATAGG 380

Query 582 TAACAAGTGACACTATGGATCTGATCTGGGGCCAGGTACCTCTATCTTGGTGACCTGGTT 641
          |||
Sbjct 379 TAACAAGCGACACTATGGATCTGATCTGGGGCCAGGTACCTCTATCTTGGTGATCTGGTT 320

Query 642 AAAAAAGCGTCTAGTGGGGCCAAACCCgggggggATCCCCGGTTTCCTTTTATTTTATCAAT 701
          |||
Sbjct 319 AAAAAACGTCTAGTGGGGCCAAACCCGGGGGGATCCCCGGTTTCCTTTTATTTTATCAAT 260

Query 702 GCTACAATG 710
          |||
Sbjct 259 GCCACTATG 251
```

>SRR2298573.849493 849493 length=500  
Length=500



Score = 429 bits (232), Expect = 7e-116  
Identities = 244/250 (98%), Gaps = 0/250 (0%)  
Strand=Plus/Plus

```
Query 462 CCCTTTAGGATTGGTTCTAAACCTGAGATGTTGTGGAAGATACTTAGTACCTGCCGATCT 521
          |||
Sbjct 1    CCCTTTAGGATTGGTTCTAAACCTGAGATGTTGTGGAAGATACTTAGTACCTACCGATCT 60

Query 522 GGTTAGTACTGCAAACACTAGTTGTAAGGCCACGAAGGATGCCAGAAAGGTACCCATAGG 581
          |||
Sbjct 61  GGTTAGTACTGCAAACACTAGTTGTAAGGCCACGAAGGATGCCAGAAAGGTACCCATAGG 120

Query 582 TAACAAGTGACACTATGGATCTGATCTGGGGCCAGGTACCTCTATCTTGGTGACCTGGTT 641
          |||
Sbjct 121 TAACAAGTGACACTATGGATCTGATCTGGGGCCAGGTACCTCTATCTTGGTGATCTGGTT 180

Query 642 AAAAAAGCGTCTAGTGGGCCAAACCCgggggggATCCCCGGTTTCCTTTTATTTTATCAAT 701
          |||
Sbjct 181 AAAAAACGTCTAGTGGGCCAAACCCGGGGGGGATCCCCGGTTTCCTTTTATTTTATCAAT 240

Query 702 GCTACAATGG 711
          |||
Sbjct 241 GCCACTATGG 250
```

Score = 416 bits (225), Expect = 6e-112  
Identities = 241/249 (97%), Gaps = 0/249 (0%)  
Strand=Plus/Minus

```
Query 473 TGGTTCTAAACCTGAGATGTTGTGGAAGATACTTAGTACCTGCCGATCTGGTAGTACTGC 532
          |||
Sbjct 500 TGGTTCTAAACCGGGGATGTTGTGGAAGATACTTAGTACCTACCGATCTGGTAGTAGTGC 441

Query 533 AAACACTAGTTGTAAGGCCACGAAGGATGCCAGAAAGGTACCCATAGGTAACAAGTGAC 592
          |||
Sbjct 440 AAACACTAGTTGTAAGGCCACGAAGGATGCCAGAAAGGTACCCATAGGTAACAAGTGAC 381

Query 593 ACTATGGATCTGATCTGGGGCCAGGTACCTCTATCTTGGTGACCTGGTTAAAAAGCGTCT 652
          |||
Sbjct 380 ACTATGGATCTGATCTGGGGCCAGGTACCTCTATCTTGGTGATCTGGTTAAAAACGTCT 321

Query 653 AGTGGGCCAAACCCgggggggATCCCCGGTTTCCTTTTATTTTATCAATGCTACAATGGA 712
          |||
Sbjct 320 AGTGGGCCAAACCCGGGGGGGATCCCCGGTTTCCTTTTATTTTATCAATGCCACTATGGA 261

Query 713 GACAATTAA 721
          |||
Sbjct 260 GACAATTAA 252
```

>SRR2298573.839628 839628 length=500  
Length=500

Score = 429 bits (232), Expect = 7e-116  
Identities = 244/250 (98%), Gaps = 0/250 (0%)  
Strand=Plus/Plus

```
Query 452 GTCTAACAAACCTTTAGGATTGGTTCTAAACCTGAGATGTTGTGGAAGATACTTAGTAC 511
          |||
```

```
Sbjct 1 GTTTAACAAACCCTTTAGGATTGGTTCTAAACCTGAGATGTTGTGGAAGATACTTAGTAC 60
Query 512 CTGCCGATCTGGTAGTACTGCAAACACTAGTTGTAAGGCCACGAAGGATGCCAGAAAG 571
|||
Sbjct 61 CTACCGATCTGGTAGTAGTGCAAACACTAGTTGTAAGGCCACGAAGGATGCCAGAAAG 120
Query 572 TACCCATAGGTAACAAGTGACACTATGGATCTGATCTGGGGCCAGGTACCTCTATCTTGG 631
|||
Sbjct 121 TACCCATAGGTAACAAGCGACACTATGGATCTGATCTGGGGCCAGGTACCTCTATCTTGG 180
Query 632 TGACCTGGTTAAAAAGCGTCTAGTGGGCCAAACCCgggggggATCCCCGGTTTCCTTTTA 691
|||
Sbjct 181 TGATCTGGTTAAAAACGTCTAGTGGGCCAAACCCGGGGGGGATCCCCGGTTTCCTTTTA 240
Query 692 TTTTATCAAT 701
|||
Sbjct 241 TTTTATCAAT 250
```

Score = 409 bits (221), Expect = 9e-110  
Identities = 243/254 (96%), Gaps = 0/254 (0%)  
Strand=Plus/Minus

```
Query 476 TTCTAAACCTGAGATGTTGTGGAAGATACTTAGTACCTGCCGATCTGGTAGTACTGCAA 535
|||
Sbjct 500 TTCTAAACCTGGGATGTTGTGGAAGTTTCTTAGTACCTACCGATCTGGTAGTAGTGCAA 441
Query 536 CACTAGTTGTAAAGGCCACGAAGGATGCCAGAAAGGTACCCATAGGTAACAAGTGACACT 595
|||
Sbjct 440 CACTAGTTGTAAAGGCCACGAAGGATGCCAGAAAGGTACCCATAGGTAACAAGGGACACT 381
Query 596 ATGGATCTGATCTGGGGCCAGGTACCTCTATCTTGGTGACCTGGTTAAAAAGCGTCTAGT 655
|||
Sbjct 380 ATGGATCTGATCTGGGGCCAGGTACCTCTATCTTGGTGATCTGGTTAAAAACGTCTAGT 321
Query 656 GGGCCAAACCCgggggggATCCCCGGTTTCCTTTTATTTTATCAATGCTACAATGGAGAC 715
|||
Sbjct 320 GGGCCAAACCCGGGGGGGATCCCCGGTTTCCTTTTATTTTATCAATGCCACTATGGAGAC 261
Query 716 AATTAAAAGTATTG 729
|||
Sbjct 260 AATTAAAGAGTATTG 247
```

>SRR2298573.835256 835256 length=500  
Length=500

Score = 429 bits (232), Expect = 7e-116  
Identities = 244/250 (98%), Gaps = 0/250 (0%)  
Strand=Plus/Plus

```
Query 326 TCTAGTAAGTTTGTGAGACGTCTGGTGACGTGTGGAACTTATTGGAAGCAACATTTTGC 385
|||
Sbjct 1 TCTAGTAAGTTTGTGAGACGTCTGGTGACGTGTGGAACTTATTGGAACAACATTTTGC 60
Query 386 TGCAAAGCATCCTATTGCCAGCGGAACAACACCTGGTAACAGGTGCCTCTGGGGCCAAAA 445
|||
Sbjct 61 TGTAAGCATCCTATTGCCAGCGGAACAACACCTGGTAACAGGTGCCTCTGGGGCCAAAA 120
```



Sbjct 10 AGGTAACAAG 1

Score = 353 bits (191), Expect = 4e-93  
Identities = 225/242 (93%), Gaps = 0/242 (0%)  
Strand=Plus/Plus

```
Query 247 GTGTGGGGTGGCAGATGGCGTGCCATAATTCTACTAGTGAGATAACCACGCTTGTGGACCT 306
          |||
Sbjct 256 GTGTGGGGTGGCAGATGGCGTGCCATAGCTCTATTAGTGAGATAACCATGCTTGTGGACCT 315

Query 307 TATGCTCACACAGCCATCCTCTAGTAAGTTTGTGAGACGTCTGGTGACGTGTGGGAACTT 366
          |||
Sbjct 316 TATGCTCACACAGCCATCCTCTAGTAAGTTTGTGAGACGTCTGGTGACGTGTGGGAACTT 375

Query 367 ATTGGAAGCAACATTTTGTCTGCAAAGCATCCTATTGCCAGCGGAACAACACCTGGTAACA 426
          |||
Sbjct 376 ATTGGAACAACATTTTGTCTGTAAGCATCCTATTGCCAGCGGAACAACACCTGGTAACA 435

Query 427 GGTGCCTCTGGGGCCAAAAGCCAAGGTCTAACAAAACCTTTAGGATTGGTTCTAAACCTG 486
          |
Sbjct 436 GTGGCCTCTGGGGCCAAAAGCCAAGGTTTAAAAAACCTTTGGGGTGGGGTTTAAACCCG 495

Query 487 AG 488
          ||
Sbjct 496 AG 497
```

>SRR2298573.806866 806866 length=500  
Length=500

Score = 429 bits (232), Expect = 7e-116  
Identities = 259/272 (95%), Gaps = 2/272 (1%)  
Strand=Plus/Minus

```
Query 415 CACCTGGTAACAGGTG--CCTCTGGGGCCAAAAGCCAAGGTCTAACAAAACCTTTAGGAT 472
          |||
Sbjct 272 CACCTGTTACCAGGTGTTGTTCCGGGGCCAAAAGCCAAGGTTTAAACAAAACCTTTAGGAT 213

Query 473 TGGTTCTAAACCTGAGATGTTGTGGAAGATACTTAGTACCTGCCGATCTGGTAGTACTGC 532
          |||
Sbjct 212 TGGTTCTAAACCTGAGATGTTGTGGAAGATACTTAGTACCTACCGATCTGGTAGTACTGC 153

Query 533 AAACACTAGTTGTAAGGCCACGAAGGATGCCCAGAAGGTACCCATAGGTAACAAGTGAC 592
          |||
Sbjct 152 AAACACTAGTTGTAAGGCCACGAAGGATGCCCAGAAGGTACCCATAGGTAACAAGCGAC 93

Query 593 ACTATGGATCTGATCTGGGGCCAGGTACCTCTATCTTGGTGACCTGGTTAAAAAGCGTCT 652
          |||
Sbjct 92 ACTATGGATCTGATCTGGGGCCAGGTACCTCTATCTTGGTGATCTGGTTAAAAACGTCT 33

Query 653 AGTGGGCCAAACCCgggggggATCCCCGTTT 684
          |||
Sbjct 32 AGTGGGCCAAACCCGGGGGGGATCCCCGTTT 1
```

Score = 411 bits (222), Expect = 3e-110  
Identities = 242/252 (96%), Gaps = 0/252 (0%)  
Strand=Plus/Plus

```

Query 407 CGGAACAACACCTGGTAACAGGTGCCTCTGGGGCCAAAAGCCAAGGTCTAACAAACCCTT 466
          |||
Sbjct 249 CGGAACAACACCTGGTAACAGGTGCCTCTGGGGCCAAAAGCCAAGGTTTAAACAAACCCTT 308

Query 467 TAGGATTGGTTCTAAACCTGAGATGTTGTGGAAGATACTTAGTACCTGCCGATCTGGTAG 526
          |||
Sbjct 309 TAGGATTGGTTCTAAACCTGAGATGTTGTGGAAGATACTTAGTACCTACCGATCTGGTAG 368

Query 527 TACTGCAAAACACTAGTTGTAAGGCCACGAAGGATGCCCAGAAGGTACCCATAGGTAACA 586
          ||
Sbjct 369 TAGTGCAAAACACTAGTTGTAAGGCCACGAAGGATGCCCAGAAGGTACCCATAGGTAACA 428

Query 587 AGTGACACTATGGATCTGATCTGGGGCCAGGTACCTCTATCTTGGTGACCTGGTTAAAAA 646
          ||
Sbjct 429 AGCGACACTATGGATCTGAACTGGGGCCAGGTACCTCTATCTTGGGGATCTGGTTAAAAA 488

Query 647 GCGTCTAGTGGG 658
          |
Sbjct 489 CAGCCTAGTGGG 500

```

>SRR2298573.801823 801823 length=500  
Length=500

Score = 429 bits (232), Expect = 7e-116  
Identities = 248/256 (97%), Gaps = 0/256 (0%)  
Strand=Plus/Minus

```

Query 328 TAGTAAGTTTGTGAGACGTCTGGTGACGTGTGGGAACTTATTGGAAGCAACATTTTGCTG 387
          |||
Sbjct 500 TAGTAAGTTTGGGAGCCGTCTGGTGACGTGTGGGAACTTATTGGAACAACATTTTGCTG 441

Query 388 CAAAGCATCCTATTGCCAGCGGAACAACACCTGGTAACAGGTGCCTCTGGGGCCAAAAGC 447
          |||
Sbjct 440 TAAAGCATCCTATTGCCAGCGGAACAACACCTGGTAACAGGTGCCTCTGGGGCCAAAAGC 381

Query 448 CAAGGTCTAACAAACCCTTTAGGATTGGTTCTAAACCTGAGATGTTGTGGAAGATACTTA 507
          |||
Sbjct 380 CAAGGTTTAAACAAACCCTTTAGGATTGGTTCTAAACCTGAGATGTTGTGGAAGATACTTA 321

Query 508 GTACCTGCCGATCTGGTAGTACTGCAAAACACTAGTTGTAAGGCCACGAAGGATGCCAG 567
          |||
Sbjct 320 GTACCTACCGATCTGGTAGTAGTGCAAAACACTAGTTGTAAGGCCACGAAGGATGCCAG 261

Query 568 AAGGTACCCATAGGTA 583
          |||
Sbjct 260 AAGGTACCCATCGGTA 245

```

Score = 420 bits (227), Expect = 4e-113  
Identities = 243/251 (97%), Gaps = 0/251 (0%)  
Strand=Plus/Plus

```

Query 269 CCATAATTCTACTAGTGAGATACCACGCTTGTGGACCTTATGCTCACACAGCCATCCTCT 328
          |||
Sbjct 1 CCATAGCTCTATTAGTGAGATACCATGCTTGTGGACCTTATGCTCACACAGCCATCCTCT 60

Query 329 AGTAAGTTTGTGAGACGTCTGGTGACGTGTGGGAACTTATTGGAAGCAACATTTTGCTGC 388

```

```

Sbjct 61      |||
AGTAAGTTTGTGAGACGTCTGGTGACGTGTGGGAACTTATTGGAAACAACATTTTGCTGT 120
Query 389    AAAGCATCCTATTGCCAGCGGAACAACACCTGGTAACAGGTGCCTCTGGGGCCAAAAGCC 448
|||
Sbjct 121    AAAGCATCCTATTGCCAGCGGAACAACACCTGGTAACAGGTGCCTCTGGGGCCAAAAGCC 180
Query 449    AAGGTCTAACAAACCCTTTAGGATTGGTTCTAAACCTGAGATGTTGTGGAAGATACTTAG 508
|||
Sbjct 181    AAGGTCTAACAAACCCTTTAGGATTGGTTCTAAACCTGAGATGTTGTGGAAGATACTTAG 240
Query 509    TACCTGCCGAT 519
|||
Sbjct 241    TACCTACCGAT 251

```

>SRR2298573.786859 786859 length=500  
Length=500

Score = 429 bits (232), Expect = 7e-116  
Identities = 244/250 (98%), Gaps = 0/250 (0%)  
Strand=Plus/Minus

```

Query 358    TGGGAACTTATTGGAAGCAACATTTTGCTGCAAAGCATCCTATTGCCAGCGGAACAACAC 417
|||
Sbjct 500    TGGGAACTTATTGGAACAACATTTTGCTGTAAAGCATCCTATTGCCAGCGGAACAACAC 441
Query 418    CTGGTAACAGGTGCCTCTGGGGCCAAAAGCCAAGGTCTAACAAACCCTTTAGGATTGGTT 477
|||
Sbjct 440    CTGGTAACAGGTGCCTCTGGGGCCAAAAGCCAAGGTCTAACAAACCCTTTAGGATTGGTT 381
Query 478    CTAAACCTGAGATGTTGTGGAAGATACTTAGTACCTGCCGATCTGGTAGTACTGCAAACA 537
|||
Sbjct 380    CTAAACCTGAGATGTTGTGGAAGATACTTAGTACCTACCGATCTGGTAGTACTGCAAACA 321
Query 538    CTAGTTGTAAGGCCACGAAGGATGCCAGAAAGGTACCCATAGGTAACAAGTGACTACTAT 597
|||
Sbjct 320    CTAGTTGTAAGGCCACGAAGGATGCCAGAAAGGTACCCATAGGTAACAAGCGACTACTAT 261
Query 598    GGATCTGATC 607
|||
Sbjct 260    GGATCTGATC 251

```

Score = 418 bits (226), Expect = 2e-112  
Identities = 242/250 (97%), Gaps = 0/250 (0%)  
Strand=Plus/Plus

```

Query 326    TCTAGTAAGTTTGTGAGACGTCTGGTGACGTGTGGGAACTTATTGGAAGCAACATTTTGC 385
|||
Sbjct 1      TCTAGTAAGTTTGTGAGACGTCTGGTGACGTGTGGGAACTTATTGGAACAACATTTTGC 60
Query 386    TGCAAAGCATCCTATTGCCAGCGGAACAACACCTGGTAACAGGTGCCTCTGGGGCCAAAA 445
|||
Sbjct 61      TGTAAGCATCCTATTGCCAGCGGAACAACACCTGGTAACAGGTGCCTCTGGGGCCAAAA 120
Query 446    GCCAAGGTCTAACAAACCCTTTAGGATTGGTTCTAAACCTGAGATGTTGTGGAAGATACT 505
|||
Sbjct 121    GCCAAGGTCTAACAAACCCTTTAGGATTGGTTCTAAACCTGAGATGTTGTGGAAGATACT 180

```

```

Query 506 TAGTACCTGCCGATCTGGTAGTACTGCAAACACTAGTTGTAAGGCCACGAAGGATGCC 565
          ||||| ||||| ||||| ||||| ||||| ||||| ||||| ||||| ||||| |||||
Sbjct 181 TAGTACCTACCGATCTGGTAGTAGTGCAAAAACACTAGTTGAAAGGCCACGAAGGATGCC 240

Query 566 AGAAGGTACC 575
          ||||| |||
Sbjct 241 AGAAGGGACC 250

```

>SRR2298573.768862 768862 length=500  
Length=500

Score = 429 bits (232), Expect = 7e-116  
Identities = 242/247 (98%), Gaps = 0/247 (0%)  
Strand=Plus/Plus

```

Query 375 CAACATTTTGCTGCAAAGCATCCTATTGCCAGCGGAACAACACCTGGTAACAGGTGCCTC 434
          ||||| ||||| ||||| ||||| ||||| ||||| ||||| ||||| ||||| |||||
Sbjct 1 CAACATTTTGCTGTAAAGCATCCTATTGCCAGCGGAACAACACCTGGTAACAGGTGCCTC 60

Query 435 TGGGGCCAAAAGCCAAGGTCTAACAAACCCTTTAGGATTGGTTCTAAACCTGAGATGTTG 494
          ||||| ||||| ||||| ||||| ||||| ||||| ||||| ||||| ||||| |||||
Sbjct 61 TGGGGCCAAAAGCCAAGGTCTAACAAACCCTTTAGGATTGGTTCTAAACCTGAGATGTTG 120

Query 495 TGGAAGATACTTAGTACCTGCCGATCTGGTAGTACTGCAAACACTAGTTGTAAGGCCAC 554
          ||||| ||||| ||||| ||||| ||||| ||||| ||||| ||||| ||||| |||||
Sbjct 121 TGGAAGATACTTAGTACCTACCGATCTGGTAGTAGTGCAAACACTAGTTGTAAGGCCAC 180

Query 555 GAAGGATGCCCAGAAGGTACCCATAGGTAACAAGTGACACTATGGATCTGATCTGGGGCC 614
          ||||| ||||| ||||| ||||| ||||| ||||| ||||| ||||| ||||| |||||
Sbjct 181 GAAGGATGCCCAGAAGGTACCCATAGGTAACAAGCGACACTATGGATCTGATCTGGGGCC 240

Query 615 AGGTACC 621
          |||||
Sbjct 241 AGGTACC 247

```

Score = 355 bits (192), Expect = 1e-93  
Identities = 230/249 (92%), Gaps = 0/249 (0%)  
Strand=Plus/Minus

```

Query 490 TGTTGTGGAAGATACTTAGTACCTGCCGATCTGGTAGTACTGCAAACACTAGTTGTAAGG 549
          ||||| ||||| ||||| ||||| ||||| ||||| ||||| ||||| ||||| |||||
Sbjct 499 TGTTGTGGAAGATCGTTGGTACCTACCGGTTTGGTTGTTGTGCAAAACCTTGTTGTAAGG 440

Query 550 CCCACGAAGGATGCCCAGAAGGTACCCATAGGTAACAAGTGACACTATGGATCTGATCTG 609
          ||||| ||||| ||||| ||||| ||||| ||||| ||||| ||||| ||||| |||||
Sbjct 439 CCCACGAAGGATGCCCAGAAGGTACCCATAGGTAACAAGCGACACTATGGATCTGATCTG 380

Query 610 GGGCCAGGTACCTCTATCTTGGTGACCTGGTTAAAAAGCGTCTAGTGGGCCAAACCCggg 669
          ||||| ||||| ||||| ||||| ||||| ||||| ||||| ||||| ||||| |||||
Sbjct 379 GGGCCAGGTACCTCTATCTTGGTGACCTGGTTAAAAAAGCGTCTAGTGGGCCAAACCCGGG 320

Query 670 ggggATCCCCGGTTTCCTTTTATTTTATCAATGCTACAATGGAGACAATTTAAAAGTATTG 729
          ||||| ||||| ||||| ||||| ||||| ||||| ||||| ||||| ||||| |||||
Sbjct 319 GGGGATCCCCGGTTTCCTTTTATTTTATCAATGCCACTATGGAGACAATTAAGAGTATTG 260

Query 730 CAGATATGG 738

```

Sbjct 259 ||||| CAGATATGG 251

>SRR2298573.759611 759611 length=500  
Length=500

Score = 429 bits (232), Expect = 7e-116  
Identities = 244/250 (98%), Gaps = 0/250 (0%)  
Strand=Plus/Plus

Query 450 AGGTCTAACAAACCCCTTTAGGATTGGTTCTAAACCTGAGATGTTGTGGAAGATACTTAGT 509  
|||||  
Sbjct 251 AGGTTTAAACAAACCCCTTTAGGATTGGTTCTAAACCTGAGATGTTGTGGAAGATACTTAGT 310

Query 510 ACCTGCCGATCTGGTAGTACTGCAAACACTAGTTGTAAGGCCACGAAGGATGCCAGAA 569  
|||||  
Sbjct 311 ACCTACCGATCTGGTAGTACTGCAAACACTAGTTGTAAGGCCACGAAGGATGCCAGAA 370

Query 570 GGTACCCATAGGTAACAAGTGACACTATGGATCTGATCTGGGGCCAGGTACCTCTATCTT 629  
|||||  
Sbjct 371 GGTACCCATAGGTAACAAGCGACACTATGGATCTGATCTGGGGCCAGGTACCTCTATCTT 430

Query 630 GGTGACCTGGTTAAAAAGCGTCTAGTGGGCCAAACCCgggggggATCCCCGGTTTCCTTT 689  
|||||  
Sbjct 431 GGTGATCTGGTTAAAAAACGTCTAGTGGGCCAAACCCGGGGGGGATCCCCGGTTTCCTTT 490

Query 690 TATTTTATCA 699  
|||||  
Sbjct 491 TATTTTATCA 500

Score = 399 bits (216), Expect = 6e-107  
Identities = 246/260 (95%), Gaps = 3/260 (1%)  
Strand=Plus/Minus

Query 479 TAAACCTGAGATGTTGTGGAAGATACTTAGTACCTGCCGATCTGGTAGTACTGCAAACAC 538  
|||||  
Sbjct 257 TAAACCT--G-TGTTGTGGAAGATCCTTAGTACCTGCCGATTTGGTAGTAGTGCAAACAC 201

Query 539 TAGTTGTAAGGCCACGAAGGATGCCAGAAAGGTACCCATAGGTAACAAGTGACACTATG 598  
|||||  
Sbjct 200 TAGTTTGAAGGCCACGAAGGATGCCAGAAAGGTACCCATAGGTAACAAGCGACACTATG 141

Query 599 GATCTGATCTGGGGCCAGGTACCTCTATCTTGGTGACCTGGTTAAAAAGCGTCTAGTGGG 658  
|||||  
Sbjct 140 GATCTGATCTGGGGCCAGGTACCTCTATCTTGGTGATCTGGTTAAAAAACGTCTAGTGGG 81

Query 659 CCAAACCCgggggggATCCCCGGTTTCCTTTTATTTTATCAATGCTACAATGGAGACAAT 718  
|||||  
Sbjct 80 CCAAACCCGGGGGGGATCCCCGGTTTCCTTTTATTTTATCAATGCCACTATGGAGACAAT 21

Query 719 TAAAAGTATTGCAGATATGG 738  
|||  
Sbjct 20 TAAGAGTATTGCAGATATGG 1

>SRR2298573.759443 759443 length=500  
Length=500



Score = 429 bits (232), Expect = 7e-116  
Identities = 244/250 (98%), Gaps = 0/250 (0%)  
Strand=Plus/Minus

```
Query 382 TTGCTGCAAAGCATCCTATTGCCAGCGGAACAACACCTGGTAACAGGTGCCTCTGGGGCC 441
|||||
Sbjct 250 TTGCTGTAAAGCATCCTATTGCCAGCGGAACAACCCCTGGTAACAGGTGCCTCTGGGGCC 191

Query 442 AAAAGCCAAGGTCTAACAAACCCCTTTAGGATTGGTTCTAAACCTGAGATGTTGTGGAAGA 501
|||||
Sbjct 190 AAAAGCCAAGGTTTAACAAACCCCTTTAGGATTGGTTCTAAACCTGAGATGTTGTGGAAGA 131

Query 502 TACTTAGTACCTGCCGATCTGGTAGTACTGCAAACACTAGTTGTAAGGCCACGAAGGAT 561
|||||
Sbjct 130 TACTTAGTACCTACCGATCTGGTAGTACTGCAAACACTAGTTGTAAGGCCACGAAGGAT 71

Query 562 GCCCAGAAGGTACCCATAGGTAACAAGTGACACTATGGATCTGATCTGGGGCCAGGTACC 621
|||||
Sbjct 70 GCCCAGAAGGTACCCATAGGTAACAAGCGACACTATGGATCTGATCTGGGGCCAGGTACC 11

Query 622 TCTATCTTGG 631
|||||
Sbjct 10 TCTATCTTGG 1
```

Score = 390 bits (211), Expect = 3e-104  
Identities = 237/250 (95%), Gaps = 0/250 (0%)  
Strand=Plus/Plus

```
Query 290 ACCACGCTTGTGGACCTTATGCTCACACAGCCATCCTCTAGTAAGTTTGTGAGACGTCTG 349
||||
Sbjct 250 ACCATGCTTGTGGACCTTATGCTCACACAGCCATCCTCTAGTAAGTTTGTGAGACGTCTG 309

Query 350 GTGACGTGTGGGAACCTTATTGGAAGCAACATTTTGCTGCAAAGCATCCTATTGCCAGCGG 409
|||||
Sbjct 310 GTGACGTGTGGGAACCTTATTGGAACAACATTTTGCTGTAAAGCATCCTATTGCCAGCGG 369

Query 410 AACAAACACCTGGTAACAGGTGCCTCTGGGGCCAAAAGCCAAGGTCTAACAAACCCCTTTAG 469
|||||
Sbjct 370 AACAAACACCTGGTAACAGGTGCATCTGGGGCCAAAAGCCAAGGTTTAACAAACCCCTTTAG 429

Query 470 GATTGGTTCTAAACCTGAGATGTTGTGGAAGATACTTAGTACCTGCCGATCTGGTAGTAC 529
|||||
Sbjct 430 GATTGGTTCTAAACCTGAGAGATTTTGGAAGAACTAAGTACCTACCGATCTGGTGGTAG 489

Query 530 TGCAAACACT 539
|||||
Sbjct 490 TGCAAACACT 499
```

>SRR2298573.756161 756161 length=500  
Length=500

Score = 429 bits (232), Expect = 7e-116  
Identities = 244/250 (98%), Gaps = 0/250 (0%)  
Strand=Plus/Minus

```
Query 331 TAAGTTTGTGAGACGTCTGGTGACGTGTGGGAACCTTATTGGAAGCAACATTTTGCTGCAA 390
```

```

|||||
Sbjct 500 TAAGTTTGTGAGACGTCTGGTGACGTGTGGGACCTTATTGGAAACAACATTTTGCTGTAA 441
Query 391 AGCATCCTATTGCCAGCGGAACAACACCTGGTAACAGGTGCCTCTGGGGCCAAAAGCCAA 450
|||||
Sbjct 440 AGCATCCTATTGCCAGCGGAACAACACCTGGTAACAGGTGCCTCTGGGGCCAAAAGCCAA 381
Query 451 GGTCTAACAAACCCTTTAGGATTGGTTCTAAACCTGAGATGTTGTGGAAGATACTTAGTA 510
|||||
Sbjct 380 GGTTTAAACAACCCTTTAGGATTGGTTCTAAACCTGAGATGTTGTGGAAGATACTTAGTA 321
Query 511 CCTGCCGATCTGGTAGTACTGCAAACACTAGTTGTAAGGCCACGAAGGATGCCCAGAAG 570
|||||
Sbjct 320 CCTACCGATCTGGTAGTACTGCAAACACTAGTTGTAAGGCCACGAAGGATGCCCAGAAG 261

Query 571 GTACCCATAG 580
|||||
Sbjct 260 GTACCCATAG 251

```

Score = 398 bits (215), Expect = 2e-106  
Identities = 238/249 (96%), Gaps = 2/249 (1%)  
Strand=Plus/Plus

```

Query 313 CACACAGCCATCCTCTAGTAAGTTTGTGAGACGTCTGGTGACGTGTGGGAACCTTATTGGA 372
|||||
Sbjct 1 CACACAGCCATCCTCTAGTAAGTTTGTGAGACGTCTGGTGACGTGTGGGAACCTTATTGGA 60

Query 373 AGCAACATTTTGTGCAAAAGCATCCTATTGCCAGCGGAACAACACCTGGTAACAGGTGCC 432
| |||||
Sbjct 61 AACCAACATTTTGTGCAAAAGCATCCTATTGCCAGCGGAACAACACCTGGTAACAGGTGCC 120

Query 433 TCTGGGGCCAAAAGCCAAGGTCTAACAAACCCTTTAGGATTGGTTCTAAACCTGAGATGT 492
|||||
Sbjct 121 TCTGGGGCCAAAAGCCAAGGTTTAAACAACCCTTTAGGATTGGTTCTAAACCTGAGATGT 180

Query 493 TGTGGAAGATACTTAGTACCTGCCGATCTGGTAGTACTGCAAACACTAGTTGTAAGGCC 552
|||||
Sbjct 181 TGTGGAAGATACTTAGTACCTACCGATCTGGAAGAAGTGCAAAAACAAGTTGTAAGGCC- 239

Query 553 ACG-AAGGA 560
||| |||||
Sbjct 240 ACGGAAGGA 248

```

>SRR2298573.737432 737432 length=500  
Length=500

Score = 429 bits (232), Expect = 7e-116  
Identities = 244/250 (98%), Gaps = 0/250 (0%)  
Strand=Plus/Plus

```

Query 451 GGTCTAACAAACCCTTTAGGATTGGTTCTAAACCTGAGATGTTGTGGAAGATACTTAGTA 510
|||||
Sbjct 251 GGTTTAAACAACCCTTTAGGATTGGTTCTAAACCTGAGATGTTGTGGAAGATACTTAGTA 310

Query 511 CCTGCCGATCTGGTAGTACTGCAAACACTAGTTGTAAGGCCACGAAGGATGCCCAGAAG 570
|||||
Sbjct 311 CCTACCGATCTGGTAGTACTGCAAACACTAGTTGTAAGGCCACGAAGGATGCCCAGAAG 370

```

```

Query 571 GTACCCATAGGTAACAAGTGACACTATGGATCTGATCTGGGGCCAGGTACCTCTATCTTG 630
          |||
Sbjct 371 GTACCCATAGGTAACAAGCGACACTATGGATCTGATCTGGGGCCAGGTACCTCTATCTTG 430

Query 631 GTGACCTGGTTAAAAAGCGTCTAGTGGGCCAAACCCgggggggATCCCCGGTTTCCTTTT 690
          |||
Sbjct 431 GTGATCTGGTTAAAAAACGTCTAGTGGGCCAAACCCGGGGGGGATCCCCGGTTTCCTTTT 490

Query 691 ATTTTATCAA 700
          |||
Sbjct 491 ATTTTATCAA 500

```

Score = 414 bits (224), Expect = 2e-111  
Identities = 240/248 (97%), Gaps = 0/248 (0%)  
Strand=Plus/Minus

```

Query 515 CCGATCTGGTAGTACTGCAAACACTAGTTGTAAGGCCACGAAGGATGCCAGAAAGGTAC 574
          |||
Sbjct 248 CCGATTTGGTAGTAGTACTGCAAACACTAGTTGTAAGGCCACGAAGGATGCCAGAAAGGTAC 189

Query 575 CCATAGGTAACAAGTGACACTATGGATCTGATCTGGGGCCAGGTACCTCTATCTTGGTGA 634
          |||
Sbjct 188 CCATAGGTAACAAGCGACACTATGGATCTGATCTGGGGCCAGGTACCTCTATCTTGGTGA 129

Query 635 CCTGGTTAAAAAGCGTCTAGTGGGCCAAACCCgggggggATCCCCGGTTTCCTTTTATTT 694
          |||
Sbjct 128 TCTGGTTAAAAAACGTCTAGTGGGCCAAACCCGGGGGGGATCCCCGGTTTCCTTTTATTT 69

Query 695 TATCAATGCTACAATGGAGACAATTAAGATATTGCAGATATGGCGACCGGAGTGGTCAG 754
          |||
Sbjct 68 TATCAATGCCACTATGGAGACAATTAAGAGTATTGCAGATATGGCGACCGGAGTGGTCAG 9

Query 755 TTCAGTTG 762
          |||
Sbjct 8 TTCAGTTG 1

```

>SRR2298573.723480 723480 length=500  
Length=500

Score = 429 bits (232), Expect = 7e-116  
Identities = 244/250 (98%), Gaps = 0/250 (0%)  
Strand=Plus/Minus

```

Query 444 AAGCCAAGGTCTAACAAACCCTTTAGGATTGGTTCTAAACCTGAGATGTTGTGGAAGATA 503
          |||
Sbjct 250 AAGCCAAGGTTTAACAAACCCTTTAGGATTGGTTCTAAACCTGAGATGTTGTGGAAGATA 191

Query 504 CTTAGTACCTGCCGATCTGGTAGTACTGCAAACACTAGTTGTAAGGCCACGAAGGATGC 563
          |||
Sbjct 190 CTTAGTACCTACCGATCTGGTAGTACTGCAAACACTAGTTGTAAGGCCACGAAGGATGC 131

Query 564 CCAGAAGGTACCCATAGGTAACAAGTGACACTATGGATCTGATCTGGGGCCAGGTACCTC 623
          |||
Sbjct 130 CCAGAAGGTACCCATAGGTAACAAGCGACACTATGGATCTGATCTGGGGCCAGGTACCTC 71

Query 624 TATCTTGGTGACCTGGTTAAAAAGCGTCTAGTGGGCCAAACCCgggggggATCCCCGGTT 683

```

```

Sbjct 70  |||||
TATCTTGGTGATCTGGTTAAAAAACGTCTAGTGGGCCAAACCCGGGGGGGATCCCCGGTT 11
Query 684 TCCTTTTATT 693
      |||||
Sbjct 10  TCCTTTTATT 1

```

Score = 418 bits (226), Expect = 2e-112  
Identities = 242/250 (97%), Gaps = 0/250 (0%)  
Strand=Plus/Plus

```

Query 317 CAGCCATCCTCTAGTAAGTTTGTGAGACGTCTGGTGACGTGTGGGAACTTATTGGAAGCA 376
      |||||
Sbjct 251 CAGCCATCCTCTAGTAAGTTTGTGAGACGTCTGGTGACGTGTGGGAACTTATTGGAACA 310

Query 377 ACATTTTGCTGCAAAGCATCCTATTGCCAGCGGAACAACACCTGGTAACAGGTGCCTCTG 436
      |||||
Sbjct 311 ACATTTTGCTGTAAAGCATCCTATTGCCAGCGGAACAACACCTGGTAACAGGTGCCTCTG 370

Query 437 GGGCCAAAAGCCAAGGTCTAACAAACCCTTTAGGATTGGTTCTAAACCTGAGATGTTGTG 496
      |||||
Sbjct 371 GGGCCAAAAGCCAAGGTCTAACAAACCCTTTAGGATTGGTTCTAAACCTGAGATGTTGTG 430

Query 497 GAAGATACTTAGTACCTGCCGATCTGGTAGTACTGCAAACACTAGTTGTAAGGCCACGA 556
      |||||
Sbjct 431 GAAGATACTTAGTACCTACCGATCTGGTAGTAGGGCAAACACAAGTTGGAAGGCCACGA 490

Query 557 AGGATGCCCA 566
      |||||
Sbjct 491 AGGATGCCCA 500

```

>SRR2298573.716980 716980 length=500  
Length=500

Score = 429 bits (232), Expect = 7e-116  
Identities = 244/250 (98%), Gaps = 0/250 (0%)  
Strand=Plus/Plus

```

Query 319 GCCATCCTCTAGTAAGTTTGTGAGACGTCTGGTGACGTGTGGGAACTTATTGGAAGCAAC 378
      |||||
Sbjct 1  GCCATCCTCTAGTAAGTTTGTGAGACGTCTGGTGACGTGTGGGAACTTATTGGAACAAC 60

Query 379 ATTTTGCTGCAAAGCATCCTATTGCCAGCGGAACAACACCTGGTAACAGGTGCCTCTGGG 438
      |||||
Sbjct 61 ATTTTGCTGTAAAGCATCCTATTGCCAGCGGAACAACACCTGGTAACAGGTGCCTCTGGG 120

Query 439 GCCAAAAGCCAAGGTCTAACAAACCCTTTAGGATTGGTTCTAAACCTGAGATGTTGTGGA 498
      |||||
Sbjct 121 GCCAAAAGCCAAGGTCTAACAAACCCTTTAGGATTGGTTCTAAACCTGAGATGTTGTGGA 180

Query 499 AGATACTTAGTACCTGCCGATCTGGTAGTACTGCAAACACTAGTTGTAAGGCCACGAAG 558
      |||||
Sbjct 181 AGATACTTAGTACCTACCGATCTGGTAGTAGTGCAAAAACACTAGTTGTAAGGCCACGAAG 240

Query 559 GATGCCCAGA 568
      |||||
Sbjct 241 GATGCCCAGA 250

```

Score = 424 bits (229), Expect = 3e-114  
Identities = 243/250 (97%), Gaps = 0/250 (0%)  
Strand=Plus/Minus

```
Query 321 CATCCTCTAGTAAGTTTGTGAGACGTCTGGTGACGTGTGGGAACTTATTGGAAGCAACAT 380
||||| ||||||| ||||||| ||||||| ||||||| ||||||| ||||||| |||||||
Sbjct 500 CATCCTTTAGTAAGTTTGTGGGACGTCTGGTGACGTGTGGGAACTTATTGGAAACAACAT 441

Query 381 TTTGCTGCAAAGCATCCTATTGCCAGCGGAACAACACCTGGTAACAGGTGCCTCTGGGGC 440
||||| ||||||| ||||||| ||||||| ||||||| ||||||| ||||||| |||||||
Sbjct 440 TTTGCTGTAAAGCATCCTATTGCCAGCGGAACAACACCTGGTAACAGGTGCCTCTGGGGC 381

Query 441 CAAAAGCCAAGGTCTAACAAACCCTTTAGGATTGGTTCTAAACCTGAGATGTTGTGGAAG 500
||||| ||||||| ||||||| ||||||| ||||||| ||||||| ||||||| |||||||
Sbjct 380 CAAAAGCCAAGGTTAACAAACCCTTTAGGATTGGTTCTAAACCTGAGATGTTGTGGAAG 321

Query 501 ATACTTAGTACCTGCCGATCTGGTAGTACTGCAAACACTAGTTGTAAGGCCACGAAGGA 560
||||| ||||||| ||||||| ||||||| ||||||| ||||||| ||||||| |||||||
Sbjct 320 ATACTTAGTACCTACCGATCTGGTAGTAGTGCAAACACTAGTTGTAAGGCCACGAAGGA 261

Query 561 TGCCCAGAAG 570
|||||
Sbjct 260 TGCCCAGAAG 251
```

>SRR2298573.711657 711657 length=500  
Length=500

Score = 429 bits (232), Expect = 7e-116  
Identities = 244/250 (98%), Gaps = 0/250 (0%)  
Strand=Plus/Minus

```
Query 358 TGGGAACTTATTGGAAGCAACATTTTGTGCTGCAAAGCATCCTATTGCCAGCGGAACAACAC 417
||||| ||||||| ||||||| ||||||| ||||||| ||||||| ||||||| |||||||
Sbjct 500 TGGGAACTTATTGGAACAACATTTTGTGCTGTAAAGCATCCTATTGCCAGCGGAACAACAC 441

Query 418 CTGGTAACAGGTGCCTCTGGGGCCAAAAGCCAAGGTCTAACAAACCCTTTAGGATTGGTT 477
||||| ||||||| ||||||| ||||||| ||||||| ||||||| ||||||| |||||||
Sbjct 440 CTGGTAACAGGTGCCTCTGGGGCCAAAAGCCAAGGTTAACAAACCCTTTAGGATTGGTT 381

Query 478 CTAAACCTGAGATGTTGTGGAAGATACTTAGTACCTGCCGATCTGGTAGTACTGCAAACA 537
||||| ||||||| ||||||| ||||||| ||||||| ||||||| ||||||| |||||||
Sbjct 380 CTAAACCTGAGATGTTGTGGAAGATACTTAGTACCTACCGATCTGGTAGTAGTGCAAACA 321

Query 538 CTAGTTGTAAGGCCACGAAGGATGCCAGAAAGGTACCCATAGGTAACAAGTGACACTAT 597
||||| ||||||| ||||||| ||||||| ||||||| ||||||| ||||||| |||||||
Sbjct 320 CTAGTTGTAAGGCCACGAAGGATGCCAGAAAGGTACCCATAGGTAACAAGCGACACTAT 261

Query 598 GGATCTGATC 607
|||||
Sbjct 260 GGATCTGATC 251
```

Score = 420 bits (227), Expect = 4e-113  
Identities = 242/249 (97%), Gaps = 1/249 (0%)  
Strand=Plus/Plus



Sbjct 310 CATTTTGCTGTAAAGCATCCTATTGCCAGCGGAACAACACCTGGTAACAGGTGCCTCTGG 369  
 Query 438 GGCCAAAAGCCAAGGTCTAACAAACCCCTTTAGGATTGGTTCTAAACCTGAGATGTTGTGG 497  
 |||  
 Sbjct 370 GGCCAAAAGCCAAGGTTTAAACAAACCCCTTTAGGATTGGTTCTAAACCTGAGATGCTGTGG 429  
 Query 498 AAGATACTTAGTACCTGCCGATCTGGTAGTACTGCAAACACTAGTTGTAAGGCCACGAA 557  
 |||  
 Sbjct 430 AAGATACTTAGTACCTACCGATCTGGTAGAAGTGCAAACCCCTAGTTGCAAAGCCCCCGAA 489  
 Query 558 GGATGCCC 565  
 |||  
 Sbjct 490 GGATGCCC 497

>SRR2298573.685469 685469 length=500  
 Length=500

Score = 429 bits (232), Expect = 7e-116  
 Identities = 244/250 (98%), Gaps = 0/250 (0%)  
 Strand=Plus/Minus

Query 440 CAAAAGCCAAGGTCTAACAAACCCCTTTAGGATTGGTTCTAAACCTGAGATGTTGTGGAA 499  
 |||  
 Sbjct 250 CAAAAGCCAAGGTTTAAACAAACCCCTTTAGGATTGGTTCTAAACCTGAGATGTTGTGGAA 191  
 Query 500 GATACTTAGTACCTGCCGATCTGGTAGTACTGCAAACACTAGTTGTAAGGCCACGAAGG 559  
 |||  
 Sbjct 190 GATACTTAGTACCTACCGATCTGGTAGTACTGCAAACACTAGTTGTAAGGCCACGAAGG 131  
 Query 560 ATGCCCAGAAGGTACCCATAGGTAACAAGTGACACTATGGATCTGATCTGGGGCCAGGTA 619  
 |||  
 Sbjct 130 ATGCCCAGAAGGTACCCATAGGTAACAAGCGACACTATGGATCTGATCTGGGGCCAGGTA 71  
 Query 620 CCTCTATCTTGGTGACCTGGTTAAAAAGCGTCTAGTGGGCCAAACCCGgggggggATCCCC 679  
 |||  
 Sbjct 70 CCTCTATCTTGGTGATCTGGTTAAAAAACGTCTAGTGGGCCAAACCCGGGGGGGATCCCC 11  
 Query 680 GGTTTCCTTT 689  
 |||  
 Sbjct 10 GGTTTCCTTT 1

Score = 329 bits (178), Expect = 7e-86  
 Identities = 218/238 (92%), Gaps = 0/238 (0%)  
 Strand=Plus/Plus

Query 384 GCTGCAAAGCATCCTATTGCCAGCGGAACAACACCTGGTAACAGGTGCCTCTGGGGCCAA 443  
 |||  
 Sbjct 263 GCTGTAAAGCATCCTATTGCCAGCGGAACAACACCTGGTAACAGGTGCCTCTGGGGCCAA 322  
 Query 444 AAGCCAAGGTCTAACAAACCCCTTTAGGATTGGTTCTAAACCTGAGATGTTGTGGAAGATA 503  
 |||  
 Sbjct 323 AAGCCAAGGTTTAAACAAACCCCTTTAGGATTGGTTCTAAACCTGAGATGTTGTGGAAGATA 382  
 Query 504 CTTAGTACCTGCCGATCTGGTAGTACTGCAAACACTAGTTGTAAGGCCACGAAGGATGC 563  
 |||  
 Sbjct 383 CTTAGTACCTACCGATCTGGTAGTACTGCAAACACTAGTTGTAAGGCCACGAAGAAGGC 442





Length=500

Score = 429 bits (232), Expect = 7e-116  
Identities = 244/250 (98%), Gaps = 0/250 (0%)  
Strand=Plus/Minus

```
Query 457 ACAAACCCCTTTAGGATTGGTTCTAAACCTGAGATGTTGTGGAAGATACTTAGTACCTGCC 516
          |||
Sbjct 250 ACAAACCCCTTTAGGATTGGTTCTAAACCTGAGATGTTGTGGAAGATACTTAGTACCTACC 191

Query 517 GATCTGGTAGTACTGCAAACACTAGTTGTAAGGCCACGAAGGATGCCCAGAAGGTACCC 576
          |||
Sbjct 190 GATCTGGTAGTAGTGCAAACACTAGTTGTAAGGCCACGAAGGATGCCCAGAAGGTACCC 131

Query 577 ATAGGTAACAAGTGACACTATGGATCTGATCTGGGGCCAGGTACCTCTATCTTGGTGACC 636
          |||
Sbjct 130 ATAGGTAACAAGCGACACTATGGATCTGATCTGGGGCCAGGTACCTCTATCTTGGTGATC 71

Query 637 TGGTTAAAAAGCGTCTAGTGGGCCAAAACCCgggggggATCCCCGGTTTCCTTTTATTTTA 696
          |||
Sbjct 70 TGGTTAAAAAACGTCTAGTGGGCCAAAACCCGGGGGGGATCCCCGGTTTCCTTTTATTTTA 11

Query 697 TCAATGCTAC 706
          |||
Sbjct 10 TCAATGCCAC 1
```

Score = 414 bits (224), Expect = 2e-111  
Identities = 242/251 (96%), Gaps = 0/251 (0%)  
Strand=Plus/Plus

```
Query 419 TGGTAACAGGTGCCTCTGGGGCCAAAAGCCAAGGTCTAACAAACCCCTTTAGGATTGGTTC 478
          |||
Sbjct 250 TGGTAACAGGTGCCTCTGGGGCCAAAAGCCAAGGTTTAAACAAACCCCTTTAGGATTGGTTC 309

Query 479 TAAACCTGAGATGTTGTGGAAGATACTTAGTACCTGCCGATCTGGTAGTACTGCAAACAC 538
          |||
Sbjct 310 TAAACCTGAGATGTTGTGGAAGATACTTAGTACCTACCGATCTGGTAGTAGTGCAAACAC 369

Query 539 TAGTTGTAAGGCCACGAAGGATGCCCAGAAGGTACCCATAGGTAACAAGTGACACTATG 598
          |||
Sbjct 370 TAGTTGTAAGGCCACGAAGGATGCCCAGAAGGTACCCATAGGTAACAACGACCCTATG 429

Query 599 GATCTGATCTGGGGCCAGGTACCTCTATCTTGGTGACCTGGTTAAAAAGCGTCTAGTGGG 658
          |||
Sbjct 430 GATCTGATCTGGGGCCAGGTACCTCTATCTTGGTGAACCTGGTTAAAAAACGTCTAGTGGG 489

Query 659 CCAAACCCggg 669
          |||
Sbjct 490 CCAAACCGGG 500
```

>SRR2298573.641321 641321 length=500  
Length=500

Score = 429 bits (232), Expect = 7e-116  
Identities = 244/250 (98%), Gaps = 0/250 (0%)  
Strand=Plus/Plus

```

Query 464 CTTTAGGATTGGTTCTAAACCTGAGATGTTGTGGAAGATACTTAGTACCTGCCGATCTGG 523
          |||
Sbjct 1 CTTTAGGATTGGTTCTAAACCTGAGATGTTGTGGAAGATACTTAGTACCTACCGATCTGG 60

Query 524 TAGTACTGCAAACACTAGTTGTAAGGCCACGAAGGATGCCCAGAAGGTACCCATAGGTA 583
          |||
Sbjct 61 TAGTACTGCAAACACTAGTTGTAAGGCCACGAAGGATGCCCAGAAGGTACCCATAGGTA 120

Query 584 ACAAGTGACACTATGGATCTGATCTGGGGCCAGGTACCTCTATCTTGGTGACCTGGTTAA 643
          |||
Sbjct 121 ACAAGCGACACTATGGATCTGATCTGGGGCCAGGTACCTCTATCTTGGTGATCTGGTTAA 180

Query 644 AAAGCGTCTAGTGGGCCAAACCCgggggggATCCCCGTTTCCTTTTATTTTATCAATGC 703
          |||
Sbjct 181 AAAACGTCTAGTGGGCCAAACCCGGGGGGGATCCCCGTTTCCTTTTATTTTATCAATGC 240

Query 704 TACAATGGAG 713
          |||
Sbjct 241 CACAATGGAG 250

```

Score = 412 bits (223), Expect = 7e-111  
Identities = 241/250 (96%), Gaps = 0/250 (0%)  
Strand=Plus/Minus

```

Query 464 CTTTAGGATTGGTTCTAAACCTGAGATGTTGTGGAAGATACTTAGTACCTGCCGATCTGG 523
          |||
Sbjct 500 CTTTAGGATTGGTTCTAAACCTGGGATGTTGTGGAAGATGCTTAGTACCTACCGATCTGG 441

Query 524 TAGTACTGCAAACACTAGTTGTAAGGCCACGAAGGATGCCCAGAAGGTACCCATAGGTA 583
          |||
Sbjct 440 TAGTACTGCAAACACTAGTTGTAAGGCCACGAAGGATGCCCAGAAGGTACCCATAGGTA 381

Query 584 ACAAGTGACACTATGGATCTGATCTGGGGCCAGGTACCTCTATCTTGGTGACCTGGTTAA 643
          |||
Sbjct 380 ACAAGCGACACTATGGATCTGATCTGGGGCCAGGTACCTCTATCTTGGTGATCTGGTTAA 321

Query 644 AAAGCGTCTAGTGGGCCAAACCCgggggggATCCCCGTTTCCTTTTATTTTATCAATGC 703
          |||
Sbjct 320 AAAACGTCTAGTGGGCCAAACCCGGGGGGGATCCCCGTTTCCTTTTATTTTATCAATGC 261

Query 704 TACAATGGAG 713
          |||
Sbjct 260 CACTATGGAG 251

```

>SRR2298573.604233 604233 length=500  
Length=500

Score = 429 bits (232), Expect = 7e-116  
Identities = 244/250 (98%), Gaps = 0/250 (0%)  
Strand=Plus/Plus

```

Query 334 GTTTGTGAGACGTCTGGTGACGTGTGGGAACTTATTGGAAGCAACATTTTGCTGCAAAGC 393
          |||
Sbjct 1 GTTTGTGAGACGTCTGGTGACGTGTGGGAACTTATTGGAACAACATTTTGCTGTAAAGC 60

Query 394 ATCCTATTGCCAGCGGAACAACACCTGGTAACAGGTGCCTCTGGGGCCAAAAGCCAAGGT 453
          |||

```

```

Sbjct 61 ATCCTATTGCCAGCGGAACAACACCTGGTAACAGGTGCCTCTGGGGCCAAAAGCCAAGGT 120
Query 454 CTAACAAAACCCTTTAGGATTGGTTCTAAACCTGAGATGTTGTGGAAGATACTTAGTACCT 513
      |||
Sbjct 121 TTAACAAAACCCTTTAGGATTGGTTCTAAACCTGAGATGTTGTGGAAGATACTTAGTACCT 180
Query 514 GCCGATCTGGTAGTACTGCAAACACTAGTTGTAAGGCCACGAAGGATGCCCAGAAGGTA 573
      |||
Sbjct 181 ACCGATCTGGTAGTACTGCAAACACAAGTTGTAAGGCCACGAAGGATGCCCAGAAGGTA 240
Query 574 CCCATAGGTA 583
      |||
Sbjct 241 CCCATAGGTA 250

```

Score = 388 bits (210), Expect = 1e-103  
Identities = 238/252 (94%), Gaps = 0/252 (0%)  
Strand=Plus/Minus

```

Query 475 GTTCTAAACCTGAGATGTTGTGGAAGATACTTAGTACCTGCCGATCTGGTAGTACTGCAA 534
      |||
Sbjct 500 GTTTTAACCCCTGAGATGTTTGGGAAGATTCTTAGTACCTACCGATCTGGTAGGAGTGCAA 441
Query 535 ACACTAGTTGTAAGGCCACGAAGGATGCCCAGAAGGTACCCATAGGTAACAAGTGACAC 594
      |||
Sbjct 440 ACACTAGTTGTAAGGCCACGAAGGATGCCCAGAAGGTACCCATAGGTAACAAGCGACAC 381
Query 595 TATGGATCTGATCTGGGGCCAGGTACCTCTATCTTGGTGACCTGGTTAAAAAGCGTCTAG 654
      |||
Sbjct 380 TATGGATCTGATCTGGGGCCAGGTACCTCTATCTTGGTGATCTGGTTAAAAAACGCTCTAG 321
Query 655 TGGGCCAAAACCCgggggggATCCCCGGTTTCCTTTTATTTTATCAATGCTACAATGGAGA 714
      |||
Sbjct 320 TGGGCCAAAACCCGGGGGGGATCCCCGGTTTCCTTTTATTTTATCAATGCCACTATGGAGA 261
Query 715 CAATTA AAAAGTA 726
      |||
Sbjct 260 CAATTAAGAGTA 249

```

>SRR2298573.602990 602990 length=500  
Length=500

Score = 429 bits (232), Expect = 7e-116  
Identities = 251/260 (97%), Gaps = 1/260 (0%)  
Strand=Plus/Minus

```

Query 373 AGCAACAT-TTTGCTGCAAAGCATCCTATTGCCAGCGGAACAACACCTGGTAACAGGTGC 431
      |||
Sbjct 260 AGCAAAATGTTTGCTGTAAAGCATCCTATTGCCAGCGGAACAGCCCCTGGTAACAGGTGC 201
Query 432 CTCTGGGGCCAAAAGCCAAGGTCTAACAAACCCTTTAGGATTGGTTCTAAACCTGAGATG 491
      |||
Sbjct 200 CTCTGGGGCCAAAAGCCAAGGTTTAAACAAACCCTTTAGGATTGGTTCTAAACCTGAGATG 141
Query 492 TTGTGGAAGATACTTAGTACCTGCCGATCTGGTAGTACTGCAAACACTAGTTGTAAGGCC 551
      |||
Sbjct 140 TTGTGGAAGATACTTAGTACCTACCGATCTGGTAGTACTGCAAACACTAGTTGTAAGGCC 81

```

Query 552 CACGAAGGATGCCCGAGAAGGTACCCATAGGTAACAAGTGACACTATGGATCTGATCTGGG 611  
 |||  
 Sbjct 80 CACGAAGGATGCCCGAGAAGGTACCCATAGGTAACAAGCGACACTATGGATCTGATCTGGG 21

Query 612 GCCAGGTACCTCTATCTTGG 631  
 |||  
 Sbjct 20 GCCAGGTACCTCTATCTTGG 1

Score = 409 bits (221), Expect = 9e-110  
 Identities = 244/255 (96%), Gaps = 1/255 (0%)  
 Strand=Plus/Plus

Query 373 AGC-AACATTTTGTGCTGCAAAGCATCCTATTGCCAGCGGAACAACACCTGGTAACAGGTGC 431  
 |||  
 Sbjct 246 AGCAAACATTTTGTGCTGTAAAGCATCCTATTGCCAGCGGAACAGCACCTGGTAACAGGTGC 305

Query 432 CTCTGGGGCCAAAAGCCAAGGTCTAACAAACCCTTTAGGATTGGTTCTAAACCTGAGATG 491  
 |||  
 Sbjct 306 CTCTGGGGCCAAAAGCCAAGGTCTAACAAACCCTTTAGGATTGGTTCTAAACCTGAGATG 365

Query 492 TTGTGGAAGATACTTAGTACCTGCCGATCTGGTAGTACTGCAAACACTAGTTGTAAGGCC 551  
 |||  
 Sbjct 366 TTGTGGAAGATACTTAGTACCTACCGATCTGGTAGTACTGCAAACACTAGTTGTAAGGCC 425

Query 552 CACGAAGGATGCCCGAGAAGGTACCCATAGGTAACAAGTGACACTATGGATCTGATCTGGG 611  
 |||  
 Sbjct 426 CACGAAGGATGCCCGAGAAGGTACCCATAGGTAACAAGCGACACACTGGATCTGATCTGGG 485

Query 612 GCCAGGTACCTCTAT 626  
 ||  
 Sbjct 486 GCACGGTACCTCTAT 500

>SRR2298573.583035 583035 length=500  
 Length=500

Score = 429 bits (232), Expect = 7e-116  
 Identities = 244/250 (98%), Gaps = 0/250 (0%)  
 Strand=Plus/Plus

Query 395 TCCTATTGCCAGCGGAACAACACCTGGTAACAGGTGCCTCTGGGGCCAAAAGCCAAGGTC 454  
 |||  
 Sbjct 1 TCCTATTGCCAGCGGAACAACACCTGGTAACAGGTGCCTCTGGGGCCAAAAGCCAAGGTT 60

Query 455 TAACAAACCCTTTAGGATTGGTTCTAAACCTGAGATGTTGTGGAAGATACTTAGTACCTG 514  
 |||  
 Sbjct 61 TAACAAACCCTTTAGGATTGGTTCTAAACCTGAGATGTTGTGGAAGATACTTAGTACCTA 120

Query 515 CCGATCTGGTAGTACTGCAAACACTAGTTGTAAGGCCACGAAGGATGCCCGAGAAGGTAC 574  
 |||  
 Sbjct 121 CCGATCTGGTAGTACTGCAAACACTAGTTGTAAGGCCACGAAGGATGCCCGAGAAGGTAC 180

Query 575 CCATAGGTAACAAGTGACACTATGGATCTGATCTGGGGCCAGGTACCTCTATCTTGGTGA 634  
 |||  
 Sbjct 181 CCATAGGTAACAAGCGACACTATGGATCTGATCTGGGGCCAGGTACCTCTATCTTGGGGA 240

Query 635 CCTGGTTAAA 644  
 |||



```

Query 354 CGTGTGGGAACTTATTGGAAGCAACATTTTGCTGCAAAGCATCCTATTGCCAGCGGAACA 413
          |||
Sbjct 499 CGTGTGGGAAATTTATTGGAACAACATTTTGCTGTAAAGCATCCTATTGCCAGCGGAACA 440

Query 414 ACACCTGGTAACAGGTGCCTCTGGGGCCAAAAGCCAAGGTCTAACAAACCCTTTAGGATT 473
          |||
Sbjct 439 ACCCCTGGTAACAGGTGCCTCTGGGGCCAAAAGCCAAGGTTAACAAACCCTTTAGGATT 380

Query 474 GGTTCCTAAACCTGAGATGTTGTGGAAGATACTTAGTACCTGCCGATCTGGTAGTACTGCA 533
          |||
Sbjct 379 GGTTCCTAAACCTGAGATGTTGTGGAAGATACTTAGTACCTACCGATCTGGTAGTACTGCA 320

Query 534 AACACTAGTTGTAAGGCCACGAAGGATGCCCAGAAGGTACCCATAGGTAACAAGTGACA 593
          |||
Sbjct 319 AACACTAGTTGTAAGGCCACGAAGGATGCCCAGAAGGTACCCATAGGTAACAAGCGACA 260

Query 594 CTATGGATC 602
          |||
Sbjct 259 CTATGGATC 251

```

>SRR2298573.567616 567616 length=500  
Length=500

Score = 429 bits (232), Expect = 7e-116  
Identities = 244/250 (98%), Gaps = 0/250 (0%)  
Strand=Plus/Plus

```

Query 362 AACTTATTGGAAGCAACATTTTGCTGCAAAGCATCCTATTGCCAGCGGAACAACACCTGG 421
          |||
Sbjct 1 AACTTATTGGAACAACATTTTGCTGTAAAGCATCCTATTGCCAGCGGAACAACACCTGG 60

Query 422 TAACAGGTGCCTCTGGGGCCAAAAGCCAAGGTCTAACAAACCCTTTAGGATTGGTTCTAA 481
          |||
Sbjct 61 TAACAGGTGCCTCTGGGGCCAAAAGCCAAGGTTAACAAACCCTTTAGGATTGGTTCTAA 120

Query 482 ACCTGAGATGTTGTGGAAGATACTTAGTACCTGCCGATCTGGTAGTACTGCAAACACTAG 541
          |||
Sbjct 121 ACCTGAGATGTTGTGGAAGATACTTAGTACCTACCGATCTGGTAGTACTGCAAACACTAG 180

Query 542 TTGTAAGGCCACGAAGGATGCCCAGAAGGTACCCATAGGTAACAAGTGACACTATGGAT 601
          |||
Sbjct 181 TTGTAAGGCCACGAAGGATGCCCAGAAGGTACCCATAGGTAACAAGGGACACTATGGAT 240

Query 602 CTGATCTGGG 611
          |||
Sbjct 241 CTGATCTGGG 250

```

Score = 363 bits (196), Expect = 7e-96  
Identities = 232/250 (93%), Gaps = 0/250 (0%)  
Strand=Plus/Minus

```

Query 475 GTTCTAAACCTGAGATGTTGTGGAAGATACTTAGTACCTGCCGATCTGGTAGTACTGCAA 534
          |||
Sbjct 500 GTTCTAAACCTGAGGTGTTGTGGGAGATTCCCTGGACCTACCGATCTGGTAAGAGTTCAA 441

Query 535 ACACTAGTTGTAAGGCCACGAAGGATGCCCAGAAGGTACCCATAGGTAACAAGTGACAC 594

```

```
|||||
Sbjct 440 A C A C T A G T T G T A A G G C C C A C G A A G G A T G C C C A G A A G G T A C C C A T A G G T A A C A A G C G A C C C 381
Query 595 T A T G G A T C T G A T C T G G G G C C A G G T A C C T C T A T C T T G G T G A C C T G G T T A A A A A G C G T C T A G 654
|||||
Sbjct 380 T A T G G A T C T G A T C T G G G G C C A G G T A C C T C T A T C T T G G T G A T C T G G T T A A A A A A C G T C T A G 321
Query 655 T G G G C C A A A C C C g g g g g g g A T C C C C G G T T T C C T T T T A T T T T A T C A A T G C T A C A A T G G A G A 714
|||||
Sbjct 320 T G G G C C A A A C C C G G G G G G G A T C C C C G G T T T C C T T T T A T T T T A T C A A T G C C A C T A T G G A G A 261
Query 715 C A A T T A A A A G 724
|||||
Sbjct 260 C A A T T A A G A G 251
```

>SRR2298573.566690 566690 length=500  
Length=500

Score = 429 bits (232), Expect = 7e-116  
Identities = 244/250 (98%), Gaps = 0/250 (0%)  
Strand=Plus/Minus

```
Query 359 G G G A A C T T A T T G G A A G C A A C A T T T T G C T G C A A A G C A T C C T A T T G C C A G C G G A A C A A C A C C 418
|||||
Sbjct 499 G G G A A C T T A T T G G A A A C A A C A T T T T G C T G T A A A G C A T C C T A T T G C C A G C G G A A C A A C A C C 440
Query 419 T G G T A A C A G G T G C C T C T G G G G C C A A A A G C C A A G G T C T A A C A A A C C C T T T A G G A T T G G T T C 478
|||||
Sbjct 439 T G G T A A C A G G T G C C T C T G G G G C C A A A A G C C A A G G T T T A A C A A A C C C T T T A G G A T T G G T T C 380
Query 479 T A A A C C T G A G A T G T T G T G G A A G A T A C T T A G T A C C T G C C G A T C T G G T A G T A C T G C A A A C A C 538
|||||
Sbjct 379 T A A A C C T G A G A T G T T G T G G A A G A T A C T T A G T A C C T A C C G A T C T G G T A G T A G T G C A A A C A C 320
Query 539 T A G T T G T A A G G C C C A C G A A G G A T G C C C A G A A G G T A C C C A T A G G T A A C A A G T G A C A C T A T G 598
|||||
Sbjct 319 T A G T T G T A A G G C C C A C G A A G G A T G C C C A G A A G G T A C C C A T A G G T A A C A A G C G A C A C T A T G 260
Query 599 G A T C T G A T C T 608
|||||
Sbjct 259 G A T C T G A T C T 250
```

Score = 425 bits (230), Expect = 9e-115  
Identities = 242/248 (98%), Gaps = 0/248 (0%)  
Strand=Plus/Plus

```
Query 347 C T G G T G A C G T G T G G G A A C T T A T T G G A A G C A A C A T T T T G C T G C A A A G C A T C C T A T T G C C A G 406
|||||
Sbjct 1 C T G G T G A C G T G T G G G A A C T T A T T G G A A A C A A C A T T T T G C T G T A A A G C A T C C T A T T G C C A G 60
Query 407 C G G A A C A A C A C C T G G T A A C A G G T G C C T C T G G G G C C A A A A G C C A A G G T C T A A C A A A C C C T T 466
|||||
Sbjct 61 C G G A A C A A C A C C T G G T A A C A G G T G C C T C T G G G G C C A A A A G C C A A G G T T T A A C A A A C C C T T 120
Query 467 T A G G A T T G G T T C T A A A C C T G A G A T G T T G T G G A A G A T A C T T A G T A C C T G C C G A T C T G G T A G 526
|||||
Sbjct 121 T A G G A T T G G T T C T A A A C C T G A G A T G T T G T G G A A G A T A C T T A G T A C C T A C C G A T C T G G T A G 180
```

```

Query 527 TACTGCAAACACTAGTTGTAAGGCCACGAAGGATGCCAGAAAGGTACCCATAGGTAACA 586
      |||
Sbjct 181 TAGTGCAAACACTAGTTGTAAGGCCACGAAGGATGCCAGAAAGGTACCCATAGGTAACA 240

Query 587 AGTGACAC 594
      |||
Sbjct 241 AGCGACAC 248

```

>SRR2298573.556526 556526 length=500  
Length=500

Score = 429 bits (232), Expect = 7e-116  
Identities = 257/268 (96%), Gaps = 5/268 (2%)  
Strand=Plus/Minus

```

Query 517 GATCTGGTA-GTACT---GCAAACACTAGTTGTAAGGCCACGAAGGATGCCAGAAAGGT 572
      |||||
Sbjct 267 GATC-GGTAGGTACTAAGGCCAAACACTAGTTGTAAGGCCACGAAGGATGCCAGAAAGGT 209

Query 573 ACCCATAGGTAACAAGTGACACTATGGATCTGATCTGGGGCCAGGTACCTCTATCTTGGT 632
      |||||
Sbjct 208 ACCCATAGGTAACAAGCGACACTATGGATCTGATCTGGGGCCAGGTACCTCTATCTTGGT 149

Query 633 GACCTGGTTAAAAAGCGTCTAGTGGGCCAAACCCgggggggATCCCCGGTTTCCTTTTAT 692
      |||
Sbjct 148 GATCTGGTTAAAAAACGTCTAGTGGGCCAAACCCGGGGGGGATCCCCGGTTTCCTTTTAT 89

Query 693 TTTATCAATGCTACAATGGAGACAATTAAGATATTGCAGATATGGCGACCGGAGTGGTC 752
      |||||
Sbjct 88 TTTATCAATGCCACTATGGAGACAATTAAGAGTATTGCAGATATGGCGACCGGAGTGGTC 29

Query 753 AGTTCAGTTGATTCCACTATCAATGCAG 780
      |||||
Sbjct 28 AGTTCAGTTGATTCCACTATCAATGCAG 1

```

Score = 381 bits (206), Expect = 2e-101  
Identities = 230/242 (95%), Gaps = 0/242 (0%)  
Strand=Plus/Plus

```

Query 504 CTTAGTACCTGCCGATCTGGTAGTACTGCAAACACTAGTTGTAAGGCCACGAAGGATGC 563
      |||||
Sbjct 251 CTTAGTACCTACCGATCTGGTAGTACTGCAAACACTAGTTGTAAGGCCACGAAGGATGC 310

Query 564 CCAGAAGGTACCCATAGGTAACAAGTGACACTATGGATCTGATCTGGGGCCAGGTACCTC 623
      |||||
Sbjct 311 CCAGAAGGTACCCATAGGTAACAAGCGACACTATGGATCTGATCTGGGGCCAGGTACCTC 370

Query 624 TATCTTGGTGACCTGGTTAAAAAGCGTCTAGTGGGCCAAACCCgggggggATCCCCGGTT 683
      |||||
Sbjct 371 TATCTTGGTGATCTGGTTAAAAAACGTCTAGTGGGCCAAACCCGGGGGGGATCCCCGGTT 430

Query 684 TCCTTTTATTTTATCAATGCTACAATGGAGACAATTAAGATATTGCAGATATGGCGACC 743
      |||||
Sbjct 431 TCCTTTTATTTTATCAATGCCCTATGGAGACAATTAAGGAATTGCAGAAATGGCAACC 490

Query 744 GG 745

```





Score = 429 bits (232), Expect = 7e-116  
Identities = 244/250 (98%), Gaps = 0/250 (0%)  
Strand=Plus/Plus

```
Query 431 CCTCTGGGGCCAAAAGCCAAGGTCTAACAAACCCTTTAGGATTGGTTCTAAACCTGAGAT 490
          |||
Sbjct 1 CCTCTGGGGCCAAAAGCCAAGGTCTAACAAACCCTTTAGGATTGGTTCTAAACCTGAGAT 60

Query 491 GTTGTGGAAGATACTTAGTACCTGCCGATCTGGTAGTACTGCAAACACTAGTTGTAAGGC 550
          |||
Sbjct 61 GTTGTGGAAGATACTTAGTACCTACCGATCTGGTAGTAGTGCAAACACTAGTTGTAAGGC 120

Query 551 CCACGAAGGATGCCCAGAAGGTACCCATAGGTAACAAGTGACACTATGGATCTGATCTGG 610
          |||
Sbjct 121 CCACGAAGGATGCCCAGAAGGTACCCATAGGTAACAAGCGACACTATGGATCTGATCTGG 180

Query 611 GGCCAGGTACCTCTATCTTGGTGACCTGGTTAAAAAGCGTCTAGTGGGCCAAAACCCggggg 670
          |||
Sbjct 181 GGCCAGGTACCTCTATCTTGGTGATCTGGTTAAAAAACGTCTAGTGGGCCAAAACCCGGGG 240

Query 671 gggATCCCCG 680
          |||
Sbjct 241 GGGATCCCCG 250
```

Score = 401 bits (217), Expect = 2e-107  
Identities = 239/250 (96%), Gaps = 0/250 (0%)  
Strand=Plus/Minus

```
Query 511 CCTGCCGATCTGGTAGTACTGCAAACACTAGTTGTAAGGCCACGAAGGATGCCCAGAAG 570
          |||
Sbjct 500 CCTGCCGATCTGGTAGTAGTGCAACCCTAGTTGTAAGGCCATGAAGGATGCCCAGAAG 441

Query 571 GTACCCATAGGTAACAAGTGACACTATGGATCTGATCTGGGGCCAGGTACCTCTATCTTG 630
          |||
Sbjct 440 GTACCCATTGGTAACAAGCGACACTATGGATCTGATCTGGGGCCAGGTACCTCTATCTTG 381

Query 631 GTGACCTGGTTAAAAAGCGTCTAGTGGGCCAAAACCCgggggggATCCCCGGTTTCCTTTT 690
          |||
Sbjct 380 GTGATCTGGTTAAAAAACGTCTAGTGGGCCAAAACCCGGGGGGGATCCCCGGTTTCCTTTT 321

Query 691 ATTTTATCAATGCTACAATGGAGACAATTAAGATATTGCAGATATGGCGACCGGAGTGG 750
          |||
Sbjct 320 ATTTTATCAATGCCACTATGGAGACAATTAAGAGTATTGCAGATATGGCGACCGGAGTGG 261

Query 751 TCAGTTCAGT 760
          |||
Sbjct 260 TCAGTTCAGT 251
```

>SRR2298573.525005 525005 length=500  
Length=500

Score = 429 bits (232), Expect = 7e-116  
Identities = 277/299 (93%), Gaps = 2/299 (1%)  
Strand=Plus/Plus

```
Query 749 GGTTCAGTTCAGTTGATTCCTACTATCAATGCAGTTAATGAGAGAGTAGAAAATGTGGGCAA 808
```



```

Query 467 TAGGATTGGTTCTAAACCTGAGATGTTGTGGAAGATACTTAGTACCTGCCGATCTGGTAG 526
          |||
Sbjct 121 TAGGATTGGTTCTAAACCTGAGATGTTGTGGAAGATACTTAGTACCTACCGATCTGGTAG 180

Query 527 TACTGCAAACACTAGTTGTAAGGCCACGAAGGATGCCCAGAAGGTACCCATAGGTAACA 586
          |||
Sbjct 181 TAGTGCAAACACTAGTTGTAAGGCCACGAAGGATGCCCAGAAGGTACCCATAGGTAACA 240

Query 587 AGTGACACTA 596
          |||
Sbjct 241 AGCGACACTA 250

```

Score = 412 bits (223), Expect = 7e-111  
Identities = 241/250 (96%), Gaps = 0/250 (0%)  
Strand=Plus/Minus

```

Query 350 GTGACGTGTGGGAACTTATTGGAAGCAACATTTTGCTGCAAAGCATCCTATTGCCAGCGG 409
          |||
Sbjct 500 GTGACGTGTGGGAACTTATTGGAACAACATTTGGCTGTAAAGCTTCCTATTGCCAGCGG 441

Query 410 AACAAACACCTGGTAACAGGTGCCTCTGGGGCCAAAAGCCAAGGTCTAACAAACCCTTTAG 469
          |||
Sbjct 440 AACAAACCCCTGGTAACAGGTGCCTCTGGGGCCAAAAGCCAAGGTTAACAAACCCTTTAG 381

Query 470 GATTGGTTCTAAACCTGAGATGTTGTGGAAGATACTTAGTACCTGCCGATCTGGTAGTAC 529
          |||
Sbjct 380 GATTGGTTCTAAACCTGAGATGTTGTGGAAGATACTTAGTACCTACCGATCTGGTAGTAC 321

Query 530 TGCAAACACTAGTTGTAAGGCCACGAAGGATGCCCAGAAGGTACCCATAGGTAACAAGT 589
          |||
Sbjct 320 TGCAAACACTAGTTGTAAGGCCACGAAGGATGCCCAGAAGGTACCCATAGGTAACAAGT 261

Query 590 GACACTATGG 599
          |||
Sbjct 260 GACACTATGG 251

```

>SRR2298573.521950 521950 length=500  
Length=500

Score = 429 bits (232), Expect = 7e-116  
Identities = 244/250 (98%), Gaps = 0/250 (0%)  
Strand=Plus/Plus

```

Query 510 ACCTGCCGATCTGGTAGTACTGCAAACACTAGTTGTAAGGCCACGAAGGATGCCCAGAA 569
          |||
Sbjct 250 ACCTACCGATCTGGTAGTACTGCAAACACTAGTTGTAAGGCCACGAAGGATGCCCAGAA 309

Query 570 GGTACCCATAGGTAACAAGTGACACTATGGATCTGATCTGGGGCCAGGTACCTCTATCTT 629
          |||
Sbjct 310 GGTACCCATAGGTAACAAGCGACACTATGGATCTGATCTGGGGCCAGGTACCTCTATCTT 369

Query 630 GGTGACCTGGTTAAAAAGCGTCTAGTGGGCCAAAACCCgggggggATCCCCGGTTTCCTTT 689
          |||
Sbjct 370 GGTGACCTGGTTAAAAAACGTCTAGTGGGCCAAAACCCGGGGGGGATCCCCGGTTTCCTTT 429

Query 690 TATTTTATCAATGCTACAATGGAGACAATTTAAAAGTATTGCAGATATGGCGACCGGAGTG 749

```



Score = 407 bits (220), Expect = 3e-109  
Identities = 243/254 (96%), Gaps = 1/254 (0%)  
Strand=Plus/Minus

```
Query 476 TTCTAAACCTGAGATGTTGTGGAAGATACTTAGTACCTGCCGATCTGGTAGTACTGCAA 535
          |||
Sbjct 500 TTCTAAACCTGAGATGTTGTTGAAGATTCTTAGTACCTACCGATCTGGTAGTAGTGCAA 441

Query 536 CACTAGTTGTAAGGCCACGAAGGATGCCAGAAAGGTACCCATAGGTAACAAGTGACACT 595
          |||
Sbjct 440 CACTAGTTGTAAGGCCACGAAGGATGCCAGAAAGGTACCCATAGGTAACAAGCGACACT 381

Query 596 ATGGATCTGATCTGGGGCCAGGTACCTCTATCTTGGTGACCTGGTTAAAAAGCGTCTAGT 655
          |||
Sbjct 380 ATGGATCTGATCTGGGGCCAGGTACCTCTATCTTGGTGATCTGGTTAAAAAACGTCTAGT 321

Query 656 GGGCCAAACCCgggggggATCCCCGGTTTCCTTTTATTTTATCAATGCTACAATGGAGAC 715
          |||
Sbjct 320 GGGCCAAACCCGGGGGGGATCCCCGGTTTCCTTTTATTTTATCAATGCCACTATGGAGAC 261

Query 716 AATTAAAAGTATTG 729
          |||
Sbjct 260 AATTAAGAGT-TTG 248
```

>SRR2298573.521506 521506 length=500  
Length=500

Score = 429 bits (232), Expect = 7e-116  
Identities = 244/250 (98%), Gaps = 0/250 (0%)  
Strand=Plus/Plus

```
Query 396 CCTATTGCCAGCGGAACAACACCTGGTAACAGGTGCCTCTGGGGCCAAAAGCCAAGGTCT 455
          |||
Sbjct 1 CCTATTGCCAGCGGAACAACACCTGGTAACAGGTGCCTCTGGGGCCAAAAGCCAAGGTTT 60

Query 456 AACAAACCTTTAGGATTGGTTCTAAACCTGAGATGTTGTGGAAGATACTTAGTACCTGC 515
          |||
Sbjct 61 AACAAACCTTTAGGATTGGTTCTAAACCTGAGATGTTGTGGAAGATACTTAGTACCTAC 120

Query 516 CGATCTGGTAGTACTGCAAACACTAGTTGTAAGGCCACGAAGGATGCCAGAAGGTACC 575
          |||
Sbjct 121 CGATCTGGTAGTAGTGCAAACACTAGTTGTAAGGCCACGAAGGATGCCAGAAGGTACC 180

Query 576 CATAGGTAACAAGTGACACTATGGATCTGATCTGGGGCCAGGTACCTCTATCTTGGTGAC 635
          |||
Sbjct 181 CATAGGTAACAAGCGACACTATGGATCTGATCTGGGGCCAGGTACCTCTATCTTGGGGAT 240

Query 636 CTGGTTAAAA 645
          |||
Sbjct 241 CTGGTTAAAA 250
```

Score = 416 bits (225), Expect = 6e-112  
Identities = 241/249 (97%), Gaps = 0/249 (0%)  
Strand=Plus/Minus



Sbjct 312 AGCTTTTCTAACCCACATTTTGTGTGGGGTGGCAGATGGCGTGCCATAGCTCTATTAGTG 371

Query 286 AGATACCACGCTTGTGGACCTTATGCTCACACAGCCATCCTCTAGTAAGTTTGTGAGACG 345  
 |||

Sbjct 372 AGATACCATGCTTGTGGACCTTATGCTCACACAGCCATCCTCTAGTAAGTTTGTGAGACG 431

Query 346 TCTGGTGACGTGTGGGAACTTATTGGAAGCAACATTTTGCTGCAAAGCATCCTATTGCCA 405  
 |||

Sbjct 432 GCTGGTGACGTTTGGGAACTTATTGAAACAACATTTTGCGGTAAAGCATCCAATGGCAC 491

Query 406 GCGGAACAA 414  
 |||

Sbjct 492 GCGGAACAA 500

>SRR2298573.502479 502479 length=500  
 Length=500

Score = 429 bits (232), Expect = 7e-116  
 Identities = 244/250 (98%), Gaps = 0/250 (0%)  
 Strand=Plus/Plus

Query 322 ATCCTCTAGTAAGTTTGTGAGACGTCTGGTGACGTGTGGGAACTTATTGGAAGCAACATT 381  
 |||

Sbjct 1 ATCCTCTAGTAAGTTTGTGAGACGTCTGGTGACGTGTGGGAACTTATTGAAACAACATT 60

Query 382 TTGCTGCAAAGCATCCTATTGCCAGCGGAACAACACCTGGTAACAGGTGCCTCTGGGGCC 441  
 |||

Sbjct 61 TTGCTGTAAAGCATCCTATTGCCAGCGGAACAACACCTGGTAACAGGTGCCTCTGGGGCC 120

Query 442 AAAAGCCAAGGTCTAACAAACCCTTTAGGATTGGTTCTAAACCTGAGATGTTGTGGAAGA 501  
 |||

Sbjct 121 AAAAGCCAAGGTTTAACAAACCCTTTAGGATTGGTTCTAAACCTGAGATGTTGTGGAAGA 180

Query 502 TACTTAGTACCTGCCGATCTGGTAGTACTGCAAACACTAGTTGTAAGGCCACGAAGGAT 561  
 |||

Sbjct 181 TACTTAGTACCTACCGATCTGGTAGTAGTGCAAACACTAGTGGTAAGGCCACGAAGGAT 240

Query 562 GCCCAGAAGG 571  
 |||

Sbjct 241 GCCCAGAAGG 250

Score = 372 bits (201), Expect = 1e-98  
 Identities = 233/249 (94%), Gaps = 0/249 (0%)  
 Strand=Plus/Minus

Query 380 TTTTGCTGCAAAGCATCCTATTGCCAGCGGAACAACACCTGGTAACAGGTGCCTCTGGGG 439  
 |||

Sbjct 499 TTTTGGTGTAAGCATCCCATTGCCCGGGAACACCCCTTGGAAACCGGTTCCCTCTGGGG 440

Query 440 CAAAAGCCAAGGTCTAACAAACCCTTTAGGATTGGTTCTAAACCTGAGATGTTGTGGAA 499  
 |||

Sbjct 439 CAAAAGCCAAGGTTTAACAAACCCTTTAGGATTGGTTCTAAACCTGAGATGTTGTGGAA 380

Query 500 GATACTTAGTACCTGCCGATCTGGTAGTACTGCAAACACTAGTTGTAAGGCCACGAAGG 559  
 |||

Sbjct 379 GATACTTAGTACCTACCGATCTGGTAGTAGTGCAAACACTAGTTGTAAGGCCACGAAGG 320



```

Query 560 ATGCCCAGAAAGGTACCCATAGGTAACAAGTGACACTATGGATCTGATCTGGGGCCAGGTA 619
          |||
Sbjct 319 ATGCCCAGAAAGGTACCCATAGGTAACAAGCGACACTAAGGATCTGATCTGGGGCCAGGTA 260

Query 620 CCTCTATCT 628
          |||
Sbjct 259 CCTCTATCT 251

```

>SRR2298573.499345 499345 length=500  
Length=500

Score = 429 bits (232), Expect = 7e-116  
Identities = 244/250 (98%), Gaps = 0/250 (0%)  
Strand=Plus/Plus

```

Query 451 GGTCTAACAAACCCTTTAGGATTGGTTCTAAACCTGAGATGTTGTGGAAGATACTTAGTA 510
          |||
Sbjct 1 GGTCTAACAAACCCTTTAGGATTGGTTCTAAACCTGAGATGTTGTGGAAGATACTTAGTA 60

Query 511 CCTGCCGATCTGGTAGTACTGCAAACACTAGTTGTAAGGCCACGAAGGATGCCCAGAAG 570
          |||
Sbjct 61 CCTACCGATCTGGTAGTACTGCAAACACTAGTTGTAAGGCCACGAAGGATGCCCAGAAG 120

Query 571 GTACCCATAGGTAACAAGTGACACTATGGATCTGATCTGGGGCCAGGTACCTCTATCTTG 630
          |||
Sbjct 121 GTACCCATAGGTAACAAGCGACACTATGGATCTGATCTGGGGCCAGGTACCTCTATCTTG 180

Query 631 GTGACCTGGTTAAAAAGCGTCTAGTGGGCCAAAACCCgggggggATCCCCGGTTTCCTTTT 690
          |||
Sbjct 181 GTGATCTGGTTAAAAACGTCTAGTGGGCCAAAACCCGGGGGGGATCCCCGGTTTCCTTTT 240

Query 691 ATTTTATCAA 700
          |||
Sbjct 241 ATTTTATCAA 250

```

Score = 412 bits (223), Expect = 7e-111  
Identities = 241/250 (96%), Gaps = 0/250 (0%)  
Strand=Plus/Minus

```

Query 499 AGATACTTAGTACCTGCCGATCTGGTAGTACTGCAAACACTAGTTGTAAGGCCACGAAG 558
          |||
Sbjct 500 AGATACTTAGTACCTTCCGATCTGGTAGTACTGCAAACACTAGTTGTAAGGCCACGAAG 441

Query 559 GATGCCCAGAAAGGTACCCATAGGTAACAAGTGACACTATGGATCTGATCTGGGGCCAGGT 618
          |||
Sbjct 440 GATGCCCAGAAAGGTACCCATAGGTAACAAGCGACACTATGGATCTGATCTGGGGCCAGGT 381

Query 619 ACCTCTATCTTGGTGACCTGGTTAAAAAGCGTCTAGTGGGCCAAAACCCgggggggATCCC 678
          |||
Sbjct 380 ACCTCTATCTTGGTGATCTGGTTAAAAACGTCTAGTGGGCCAAAACCCGGGGGGGATCCC 321

Query 679 CGGTTTCCTTTTATTTTATCAATGCTACAATGGAGACAATTAAGAGTATTGCAGATATGG 738
          |||
Sbjct 320 CGGTTTCCTTTTATTTTATCAATGCCACTATGGAGACAATTAAGAGTATTGCAGATATGG 261

Query 739 CGACCGGAGT 748
          |||

```

Sbjct 260 CGACCGGAGT 251

>SRR2298573.484755 484755 length=500  
Length=500

Score = 429 bits (232), Expect = 7e-116  
Identities = 244/250 (98%), Gaps = 0/250 (0%)  
Strand=Plus/Plus

```
Query 451 GGTCTAACAAAACCCCTTTAGGATTGGTTCTAAACCTGAGATGTTGTGGAAGATACTTAGTA 510
          ||| |||
Sbjct 1 GGTTTAACAAAACCCCTTTAGGATTGGTTCTAAACCTGAGATGTTGTGGAAGATACTTAGTA 60

Query 511 CCTGCCGATCTGGTAGTACTGCAAACACTAGTTGTAAGGCCACGAAGGATGCCCAGAAG 570
          ||| |||
Sbjct 61 CCTACCGATCTGGTAGTAGTGCAAACACTAGTTGTAAGGCCACGAAGGATGCCCAGAAG 120

Query 571 GTACCCATAGGTAACAAGTGACACTATGGATCTGATCTGGGGCCAGGTACCTCTATCTTG 630
          ||| |||
Sbjct 121 GTACCCATAGGTAACAAGCGACACTATGGATCTGATCTGGGGCCAGGTACCTCTATCTTG 180

Query 631 GTGACCTGGTTAAAAAAGCGTCTAGTGGGCCAAACCCgggggggATCCCCGGTTTCCTTTT 690
          ||| |||
Sbjct 181 GTGATCTGGTTAAAAAACGTCTAGTGGGCCAAACCCGGGGGGGATCCCCGGTTTCCTTTT 240

Query 691 ATTTTATCAA 700
          |||
Sbjct 241 ATTTTATCAA 250
```

Score = 381 bits (206), Expect = 2e-101  
Identities = 236/251 (94%), Gaps = 0/251 (0%)  
Strand=Plus/Minus

```
Query 475 GTTCTAAACCTGAGATGTTGTGGAAGATACTTAGTACCTGCCGATCTGGTAGTACTGCAA 534
          ||| |||
Sbjct 500 GTTTTAAACCTGAGATGTTTTGGAAGATACTTAGTCCCTACCGATCTTGTAGTAGTTCAA 441

Query 535 ACACTAGTTGTAAGGCCACGAAGGATGCCCAGAAGGTACCCATAGGTAACAAGTGACAC 594
          ||| |||
Sbjct 440 ACACTAGTTGTAAGGCCAAGAAGGATGCCCAGAAGGTACCCATAGGTAACAAGCGACTC 381

Query 595 TATGGATCTGATCTGGGGCCAGGTACCTCTATCTTGGTGACCTGGTTAAAAAAGCGTCTAG 654
          ||| |||
Sbjct 380 TATGGATCTGATCTGGGGCCAGGTACCTCTATCTTGGTGATCTGGTTAAAAAAGCGTCTAG 321

Query 655 TGGGCCAAAACCCgggggggATCCCCGGTTTCCTTTTATTTTATCAATGCTACAATGGAGA 714
          ||| |||
Sbjct 320 TGGGCCAAAACCCGGGGGGGATCCCCGGTTTCCTTTTATTTTATCAATGCCACTATGGAGA 261

Query 715 CAATTAAGAGT 725
          |||
Sbjct 260 CAATTAAGAGT 250
```

>SRR2298573.477415 477415 length=500  
Length=500



```

Sbjct 190 ACCTGAGATGTTGTGGAAGATACTTAGTACCTACCGATCTGGTAGTAGTGCAAACACTAG 131
Query 542 TTGTAAGGCCACGAAGGATGCCAGAAAGGTACCCATAGGTAACAAGTGACACTATGGAT 601
|
Sbjct 130 TTGTAAGGCCACGAAGGATGCCAGAAAGGTACCCATAGGTAACAAGCGACACTATGGAT 71
Query 602 CTGATCTGGGGCCAGGTACCTCTATCTTGGTGACCTGGTTAAAAAGCGTCTAGTGGGCCA 661
|
Sbjct 70 CTGATCTGGGGCCAGGTACCTCTATCTTGGTGATCTGGTTAAAAAACGCTCTAGTGGGCCA 11
Query 662 AACCCggggg 671
|
Sbjct 10 AACCCGGGGG 1

```

Score = 383 bits (207), Expect = 6e-102  
Identities = 227/237 (96%), Gaps = 0/237 (0%)  
Strand=Plus/Plus

```

Query 230 TTTCTAACCCACATTTTGTGTGGGGTGGCAGATGGCGTGCCATAATTCTACTAGTGAGAT 289
|
Sbjct 264 TTTCTAACCCACATTTTGTGTGGGGTGGCAGATGGCGTGCCATAGCTCTATTAGTGAGAT 323
Query 290 ACCACGCTTGTGGACCTTATGCTCACACAGCCATCCTCTAGTAAGTTTGTGAGACGTCTG 349
|
Sbjct 324 ACCATGCTTGTGGACCTTATGCTCACACAGCCATCCTCTAGTAAGTTTGTGAGACGTCTG 383
Query 350 GTGACGTGTGGGAACTTATTGGAAGCAACATTTTGCTGCAAAGCATCCTATTGCCAGCGG 409
|
Sbjct 384 GGGACGTGTGGGAACTTATTGGAACAACATTTTGCTGTAAAGCATCCTATTGCCAGCGG 443
Query 410 AACAAACCTGGTAACAGGTGCCTCTGGGGCCAAAAGCCAAGGTCTAACAAACCTT 466
|
Sbjct 444 AACAAACCTGGTAACAGGGGCCCTGGGGCCAAAAGCCAAGGTTAACAAACCTT 500

```

>SRR2298573.474177 474177 length=500  
Length=500

Score = 429 bits (232), Expect = 7e-116  
Identities = 244/250 (98%), Gaps = 0/250 (0%)  
Strand=Plus/Minus

```

Query 350 GTGACGTGTGGGAACTTATTGGAAGCAACATTTTGCTGCAAAGCATCCTATTGCCAGCGG 409
|
Sbjct 500 GTGACGTGTGGGAACTTATTGGAACAACATTTTGCTGTAAAGCATCCTATTGCCAGCGG 441
Query 410 AACAAACCTGGTAACAGGTGCCTCTGGGGCCAAAAGCCAAGGTCTAACAAACCTTTAG 469
|
Sbjct 440 AACAAACCTGGTAACAGGTGCCTCTGGGGCCAAAAGCCAAGGTTAACAAACCTTTAG 381
Query 470 GATTGGTTCTAAACCTGAGATGTTGTGGAAGATACTTAGTACCTGCCGATCTGGTAGTAC 529
|
Sbjct 380 GATTGGTTCTAAACCTGAGATGTTGTGGAAGATACTTAGTACCTACCGATCTGGTAGTAG 321
Query 530 TGCAAACACTAGTTGTAAGGCCACGAAGGATGCCAGAAAGGTACCCATAGGTAACAAGT 589
|
Sbjct 320 TGCAAACACTAGTTGTAAGGCCACGAAGGATGCCAGAAAGGTACCCATAGGTAACAAGC 261

```



Identities = 236/250 (94%), Gaps = 0/250 (0%)  
Strand=Plus/Minus

```
Query 465 TTTAGGATTGGTTCTAAACCTGAGATGTTGTGGAAGATACTTAGTACCTGCCGATCTGGT 524
          ||| ||| ||| ||| ||| ||| ||| ||| ||| ||| ||| ||| ||| ||| |||
Sbjct 500 TTTAGGATTGGTTCAAACCTGGGGTGTGTGGAAGATTCTTAGTACCTACCGATCTGGT 441

Query 525 AGTACTGCAAACACTAGTTGTAAGGCCACGAAGGATGCCCAGAAGGTACCCATAGGTAA 584
          ||| ||| ||| ||| ||| ||| ||| ||| ||| ||| ||| ||| ||| ||| |||
Sbjct 440 AGTAGTGCAAACACTAGTTGTAAGGCCACGAAGGATACCCAGAAGGTACCCATAGGTAA 381

Query 585 CAAGTGACACTATGGATCTGATCTGGGGCCAGGTACCTCTATCTTGGTGACCTGGTTAAA 644
          ||| ||| ||| ||| ||| ||| ||| ||| ||| ||| ||| ||| ||| ||| |||
Sbjct 380 CAAGCGACACTATGGATCTGATCTGGGGCCAGGTACCTCTATCTTGGTGATCTGGTTAAA 321

Query 645 AAGCGTCTAGTGGGCCAAACCCgggggggATCCCCGGTTTCCTTTTATTTTATCAATGCT 704
          || ||| ||| ||| ||| ||| ||| ||| ||| ||| ||| ||| ||| ||| |||
Sbjct 320 AAACGTCTAGTGGGCCAAACCCGGGGGGATCCCCGGTTTCCTTTTATTTTATCAATGCC 261

Query 705 ACAATGGAGA 714
          || ||| ||| |||
Sbjct 260 ACTATGGAGA 251
```

>SRR2298573.471442 471442 length=500  
Length=500

Score = 429 bits (232), Expect = 7e-116  
Identities = 244/250 (98%), Gaps = 0/250 (0%)  
Strand=Plus/Plus

```
Query 451 GGTCTAACAAACCCCTTTAGGATTGGTTCTAAACCTGAGATGTTGTGGAAGATACTTAGTA 510
          ||| ||| ||| ||| ||| ||| ||| ||| ||| ||| ||| ||| ||| ||| |||
Sbjct 1 GGTCTAACAAACCCCTTTAGGATTGGTTCTAAACCTGAGATGTTGTGGAAGATACTTAGTA 60

Query 511 CCTGCCGATCTGGTAGTACTGCAAACACTAGTTGTAAGGCCACGAAGGATGCCCAGAAG 570
          ||| ||| ||| ||| ||| ||| ||| ||| ||| ||| ||| ||| ||| ||| |||
Sbjct 61 CCTACCGATCTGGTAGTACTGCAAACACTAGTTGTAAGGCCACGAAGGATGCCCAGAAG 120

Query 571 GTACCCATAGGTAACAAGTGACACTATGGATCTGATCTGGGGCCAGGTACCTCTATCTTG 630
          ||| ||| ||| ||| ||| ||| ||| ||| ||| ||| ||| ||| ||| ||| |||
Sbjct 121 GTACCCATAGGTAACAAGCGACACTATGGATCTGATCTGGGGCCAGGTACCTCTATCTTG 180

Query 631 GTGACCTGGTTAAAAAGCGTCTAGTGGGCCAAACCCgggggggATCCCCGGTTTCCTTTT 690
          ||| ||| ||| ||| ||| ||| ||| ||| ||| ||| ||| ||| ||| ||| |||
Sbjct 181 GTGATCTGGTTAAAAAACGCTCTAGTGGGCCAAACCCGGGGGGGATCCCCGGTTTCCTTTT 240

Query 691 ATTTTATCAA 700
          ||| ||| ||| |||
Sbjct 241 ATTTTATCAA 250
```

Score = 374 bits (202), Expect = 3e-99  
Identities = 234/250 (94%), Gaps = 0/250 (0%)  
Strand=Plus/Minus

```
Query 624 TATCTTGGTGACCTGGTTAAAAAGCGTCTAGTGGGCCAAACCCgggggggATCCCCGGTT 683
          ||| ||| ||| ||| ||| ||| ||| ||| ||| ||| ||| ||| ||| ||| |||
Sbjct 500 TATCTTGGTGATCTGGTTAAAAAACGCTCTAGGGGGCCAAACCCGGGGGGGATCCCCGGTT 441
```







Query 615 AGGTACC 621  
|||||||  
Sbjct 491 AGGTACC 497

>SRR2298573.464947 464947 length=500  
Length=500

Score = 429 bits (232), Expect = 7e-116  
Identities = 242/247 (98%), Gaps = 0/247 (0%)  
Strand=Plus/Plus

Query 319 GCCATCCTCTAGTAAGTTTGTGAGACGTCTGGTGACGTGTGGGAACCTTATTGGAAGCAAC 378  
|||||||  
Sbjct 1 GCCATCCTCTAGTAAGTTTGTGAGACGTCTGGTGACGTGTGGGAACCTTATTGGAACAAC 60

Query 379 ATTTTGCTGCAAAGCATCCTATTGCCAGCGGAACAACACCTGGTAACAGGTGCCTCTGGG 438  
|||||||  
Sbjct 61 ATTTTGCTGTAAAAGCATCCTATTGCCAGCGGAACAACACCTGGTAACAGGTGCCTCTGGG 120

Query 439 GCCAAAAGCCAAGGTCTAACAAACCCTTTAGGATTGGTTCTAAACCTGAGATGTTGTGGA 498  
|||||||  
Sbjct 121 GCCAAAAGCCAAGGTTTAAACAAACCCTTTAGGATTGGTTCTAAACCTGAGATGTTGTGGA 180

Query 499 AGATACTTAGTACCTGCCGATCTGGTAGTACTGCAAACACTAGTTGTAAGGCCACGAAG 558  
|||||||  
Sbjct 181 AGATACTTAGTACCTACCGATCTGGTAGTACTGCAAACACTAGTTGTAAGGCCACGAAG 240

Query 559 GATGCCC 565  
|||||||  
Sbjct 241 GATGCCC 247

Score = 368 bits (199), Expect = 2e-97  
Identities = 229/244 (94%), Gaps = 0/244 (0%)  
Strand=Plus/Minus

Query 352 GACGTGTGGGAACCTTATTGGAAGCAACATTTTGCTGCAAAGCATCCTATTGCCAGCGGAA 411  
|||||||  
Sbjct 493 GACGTGGGGGAATTTATTGGAACAACATTTTGCTGTAAAGCTTCCTATGGCCAGCGGAA 434

Query 412 CAACACCTGGTAACAGGTGCCTCTGGGGCCAAAAGCCAAGGTCTAACAAACCCTTTAGGA 471  
|||||||  
Sbjct 433 CAACACCTGGGAACAGGTGCCTCTGGGGCCAAAAGCCAATGTTTAAACAAGCCCTTTAGGA 374

Query 472 TTGGTTCTAAACCTGAGATGTTGTGGAAGATACTTAGTACCTGCCGATCTGGTAGTACTG 531  
|||||||  
Sbjct 373 TTGGTTCTAAACCTGAGATGTTGTGGAAGATCCTTAGTACCTACCGATCTGGTAGTAGTG 314

Query 532 CAAACACTAGTTGTAAGGCCACGAAGGATGCCCGAAGGTACCCATAGGTAACAAGTGA 591  
|||||||  
Sbjct 313 CAAACACTAGTTGTAAGGCCACGAAGGATGCCCTGAAGGTACCCATAGGTAACAAGCGA 254

Query 592 CACT 595  
||||  
Sbjct 253 CACT 250

>SRR2298573.460111 460111 length=500  
Length=500

Score = 429 bits (232), Expect = 7e-116  
Identities = 244/250 (98%), Gaps = 0/250 (0%)  
Strand=Plus/Minus

```
Query 444 AAGCCAAGGTCTAACAAACCCCTTTAGGATTGGTTCTAAACCTGAGATGTTGTGGAAGATA 503
          |||
Sbjct 250 AAGCCAAGGTTTAAACAAACCCCTTTAGGATTGGTTCTAAACCTGAGATGTTGTGGAAGATA 191

Query 504 CTTAGTACCTGCCGATCTGGTAGTACTGCAAACACTAGTTGTAAGGCCACGAAGGATGC 563
          |||
Sbjct 190 CTTAGTACCTACCGATCTGGTAGTACTGCAAACACTAGTTGTAAGGCCACGAAGGATGC 131

Query 564 CCAGAAGGTACCCATAGGTAACAAGTGACACTATGGATCTGATCTGGGGCCAGGTACCTC 623
          |||
Sbjct 130 CCAGAAGGTACCCATAGGTAACAAGCGACACTATGGATCTGATCTGGGGCCAGGTACCTC 71

Query 624 TATCTTGGTGACCTGGTTAAAAAGCGTCTAGTGGGCCAAAACCCgggggggATCCCCGGTT 683
          |||
Sbjct 70 TATCTTGGTGATCTGGTTAAAAAACGTCTAGTGGGCCAAAACCCGGGGGGGATCCCCGGTT 11

Query 684 TCCTTTTATT 693
          |||
Sbjct 10 TCCTTTTATT 1
```

Score = 396 bits (214), Expect = 7e-106  
Identities = 238/250 (95%), Gaps = 0/250 (0%)  
Strand=Plus/Plus

```
Query 372 AAGCAACATTTTGCTGCAAAGCATCCTATTGCCAGCGGAACAACACCTGGTAACAGGTGC 431
          ||
Sbjct 251 AAACAACATTTTGCTGTAAAGCATCCTATTGCCAGCGGAACAACACCTGGTAACAGGTGC 310

Query 432 CTCTGGGGCCAAAAGCCAAGGTCTAACAAACCCCTTTAGGATTGGTTCTAAACCTGAGATG 491
          |||
Sbjct 311 CTCTGGGGCCAAAAGCCAAGGTTTAAACAAACCCCTTTAGGATTGGTTCTAAACCTGAGATG 370

Query 492 TTGTGGAAGATACTTAGTACCTGCCGATCTGGTAGTACTGCAAACACTAGTTGTAAGGCC 551
          |||
Sbjct 371 TTGTGGAAGATACTTAGTACCTACCGATCTGGTAGTAGTGCAAACACTAGTTGTAAGGCC 430

Query 552 CACGAAGGATGCCCGAAGGTACCCATAGGTAACAAGTGACACTATGGATCTGATCTGGG 611
          |||
Sbjct 431 CACGAAGGATGCCCGAAGGAACCCATAGGAAAACAAGCGCCACCATGGACCTGACCTGGG 490

Query 612 GCCAGGTACC 621
          |||
Sbjct 491 GCCAGGTACC 500
```

>SRR2298573.445246 445246 length=500  
Length=500

Score = 429 bits (232), Expect = 7e-116  
Identities = 244/250 (98%), Gaps = 0/250 (0%)  
Strand=Plus/Plus

```

Query 445 AGCCAAGGTCTAACAAACCCTTTAGGATTGGTTCTAAACCTGAGATGTTGTGGAAGATAC 504
          |||
Sbjct 1   AGCCAAGGTTTAAACAAACCCTTTAGGATTGGTTCTAAACCTGAGATGTTGTGGAAGATAC 60

Query 505 TTAGTACCTGCCGATCTGGTAGTACTGCAAACACTAGTTGTAAGGCCACGAAGGATGCC 564
          |||
Sbjct 61  TTAGTACCTACCGATCTGGTAGTAGTGCAAACACTAGTTGTAAGGCCACGAAGGATGCC 120

Query 565 CAGAAAGGTACCCATAGGTAACAAGTGACACTATGGATCTGATCTGGGGCCAGGTACCTCT 624
          |||
Sbjct 121 CAGAAAGGTACCCATAGGTAACAAGTGACACTATGGATCTGATCTGGGGCCAGGTACCTCT 180

Query 625 ATCTTGGTGACCTGGTTAAAAAGCGTCTAGTGGGCCAAACCCgggggggATCCCCGGTTT 684
          |||
Sbjct 181 ATCTTGGTGATCTGGTTAAAAAACGTCTAGTGGGCCAAACCCGGGGGGGATCCCCGGTTT 240

Query 685 CCTTTTATTT 694
          |||
Sbjct 241 CCTTTTATTT 250

```

Score = 407 bits (220), Expect = 3e-109  
Identities = 240/250 (96%), Gaps = 0/250 (0%)  
Strand=Plus/Minus

```

Query 540 AGTTGTAAGGCCACGAAGGATGCCAGAAAGGTACCCATAGGTAACAAGTGACACTATGG 599
          |||
Sbjct 499 AGTTGTAAGGCCCAAGGAGGATGCCAGAAAGGTACCCATAGGTAACAAGCGACCCATGG 440

Query 600 ATCTGATCTGGGGCCAGGTACCTCTATCTTGGTGACCTGGTTAAAAAGCGTCTAGTGGGC 659
          |||
Sbjct 439 ATCTGATCTGGGGCCAGGTACCTCTATCTTGGTGATCTGGTTAAAAAACGTCTAGTGGGC 380

Query 660 CAAACCCgggggggATCCCCGGTTTCCTTTTATTTTATCAATGCTACAATGGAGACAATT 719
          |||
Sbjct 379 CAAACCCGGGGGGGATCCCCGGTTTCCTTTTATTTTATCAATGCCACTATGGAGACAATT 320

Query 720 AAAAGTATTGCAGATATGGCGACCGGAGTGGTCAGTTCAGTTGATTCCACTATCAATGCA 779
          |||
Sbjct 319 AAGAGTATTGCAGATATGGCGACCGGAGTGGTCAGTTCAGTTGATTCCACTATCAATGTA 260

Query 780 GTTAATGAGA 789
          |||
Sbjct 259 GTTAATGAGA 250

```

>SRR2298573.439597 439597 length=500  
Length=500

Score = 429 bits (232), Expect = 7e-116  
Identities = 244/250 (98%), Gaps = 0/250 (0%)  
Strand=Plus/Minus

```

Query 369 TGGAAGCAACATTTTGCTGCAAAGCATCCTATTGCCAGCGGAACAACACCTGGTAACAGG 428
          |||
Sbjct 250 TGGAAACAACATTTTGCTGTAAAGCATCCTATTGCCAGCGGAACAACACCTGGTAACAGG 191

Query 429 TGCTCTGGGGCCAAAAGCCAAGGTCTAACAAACCCTTTAGGATTGGTTCTAAACCTGAG 488

```

```

Sbjct 190 |||||
TGCCTCTGGGGCCAAAAGCCAAGGTTTAAACAAACCCTTTAGGATTGGTTCTAAACCTGAG 131
Query 489 ATGTTGTGGAAGATACTTAGTACCTGCCGATCTGGTAGTACTGCAAACACTAGTTGTAAG 548
|||||
Sbjct 130 ATGTTGTGGAAGATACTTAGTACCTACCGATCTGGTAGTAGTGCAAACACTAGTTGTAAG 71
Query 549 GCCCACGAAGGATGCCCAGAAGGTACCCATAGGTAACAAGTGACACTATGGATCTGATCT 608
|||||
Sbjct 70 GCCCACGAAGGATGCCCAGAAGGTACCCATAGGTAACAAGCGACACTATGGATCTGATCT 11
Query 609 GGGGCCAGGT 618
|||||
Sbjct 10 GGGGCCAGGT 1

```

Score = 427 bits (231), Expect = 3e-115  
Identities = 243/249 (98%), Gaps = 0/249 (0%)  
Strand=Plus/Plus

```

Query 333 AGTTTGTGAGACGTCTGGTGACGTGTGGGAACTTATTGGAAGCAACATTTTGCTGCAAAG 392
|||||
Sbjct 250 AGTTTGTGAGACGTCTGGTGACGTGTGGGAACTTATTGGAACAACATTTTGCTGTAAAG 309
Query 393 CATCCTATTGCCAGCGGAACAACACCTGGTAACAGGTGCCTCTGGGGCCAAAAGCCAAGG 452
|||||
Sbjct 310 CATCCTATTGCCAGCGGAACAACACCTGGTAACAGGTGCCTCTGGGGCCAAAAGCCAAGG 369
Query 453 TCTAACAAACCCTTTAGGATTGGTTCTAAACCTGAGATGTTGTGGAAGATACTTAGTACC 512
| |||||
Sbjct 370 TTTAACAAACCCTTTAGGATTGGTTCTAAACCTGAGATGTTGTGGAAGATACTTAGTACC 429
Query 513 TGCCGATCTGGTAGTACTGCAAACACTAGTTGTAAGGCCACGAAGGATGCCCAGAAGGT 572
| |||||
Sbjct 430 TACCGATCTGGTAGTAGTGCAAACACTAGTTGTAAGGCCACGAAGGATGCCCAGAAGGA 489
Query 573 ACCCATAGG 581
|||||
Sbjct 490 ACCCATAGG 498

```

>SRR2298573.434018 434018 length=500  
Length=500

Score = 429 bits (232), Expect = 7e-116  
Identities = 244/250 (98%), Gaps = 0/250 (0%)  
Strand=Plus/Plus

```

Query 313 CACACAGCCATCCTCTAGTAAGTTTGTGAGACGTCTGGTGACGTGTGGGAACTTATTGGA 372
|||||
Sbjct 1 CACACAGCCATCCTCTAGTAAGTTTGTGAGACGTCTGGTGACGTGTGGGAACTTATTGGA 60
Query 373 AGCAACATTTTGCTGCAAAGCATCCTATTGCCAGCGGAACAACACCTGGTAACAGGTGCC 432
| |||||
Sbjct 61 AACCAACATTTTGCTGTAAAGCATCCTATTGCCAGCGGAACAACACCTGGTAACAGGTGCC 120
Query 433 TCTGGGGCCAAAAGCCAAGGTCTAACAAACCCTTTAGGATTGGTTCTAAACCTGAGATGT 492
|||||
Sbjct 121 TCTGGGGCCAAAAGCCAAGGTTTAAACAAACCCTTTAGGATTGGTTCTAAACCTGAGATGT 180

```

```

Query 493 TGTGGAAGATACTTAGTACCTGCCGATCTGGTAGTACTGCAAACACTAGTTGTAAGGCC 552
          |||
Sbjct 181 TGTGGAAGATACTTAGTACCTACCGATCTGGTAGTAGTGCAAACACAAGTTGTAAGGCC 240

Query 553 ACGAAGGATG 562
          |||
Sbjct 241 ACGAAGGATG 250

```

Score = 407 bits (220), Expect = 3e-109  
Identities = 240/250 (96%), Gaps = 0/250 (0%)  
Strand=Plus/Minus

```

Query 337 TGTGAGACGTCTGGTGACGTGTGGGAACTTATTGGAAGCAACATTTTGCTGCAAAGCATC 396
          |||
Sbjct 500 TGTGGGGCGTTTGGTGACGTGGGGGAACTTATTGGAAACAACATTTTGCTGTAAAGCATC 441

Query 397 CTATTGCCAGCGGAACAACACCTGGTAACAGGTGCCTCTGGGGCCAAAAGCCAAGGTCTA 456
          |||
Sbjct 440 CTATTGCCAGCGGAACAACCCCTGGTAACAGGTGCCTCTGGGGCCAAAAGCCAAGGTTTA 381

Query 457 ACAAACCCTTTAGGATTGGTTCTAAACCTGAGATGTTGTGGAAGATACTTAGTACCTGCC 516
          |||
Sbjct 380 ACAAACCCTTTAGGATTGGTTCTAAACCTGAGATGTTGTGGAAGATACTTAGTACCTACC 321

Query 517 GATCTGGTAGTACTGCAAACACTAGTTGTAAGGCCACGAAGGATGCCCAGAAGGTACCC 576
          |||
Sbjct 320 GATCTGGTAGTAGTGCAAACACTAGTTGTAAGGCCACGAAGGATGCCCAGAAGGTACCC 261

Query 577 ATAGGTAACA 586
          |||
Sbjct 260 ATAGGTAACA 251

```

>SRR2298573.432649 432649 length=500  
Length=500

Score = 429 bits (232), Expect = 7e-116  
Identities = 244/250 (98%), Gaps = 0/250 (0%)  
Strand=Plus/Plus

```

Query 377 ACATTTTGCTGCAAAGCATCCTATTGCCAGCGGAACAACACCTGGTAACAGGTGCCTCTG 436
          |||
Sbjct 1 ACATTTTGCTGTAAAGCATCCTATTGCCAGCGGAACAACACCTGGTAACAGGTGCCTCTG 60

Query 437 GGGCCAAAAGCCAAGGTCTAAACAAACCCTTTAGGATTGGTTCTAAACCTGAGATGTTGTG 496
          |||
Sbjct 61 GGGCCAAAAGCCAAGGTTTAAACAAACCCTTTAGGATTGGTTCTAAACCTGAGATGTTGTG 120

Query 497 GAAGATACTTAGTACCTGCCGATCTGGTAGTACTGCAAACACTAGTTGTAAGGCCACGA 556
          |||
Sbjct 121 GAAGATACTTAGTACCTACCGATCTGGTAGTAGTGCAAACACTAGTTGTAAGGCCACGA 180

Query 557 AGGATGCCCAGAAGGTACCCATAGGTAACAAGTGACACTATGGATCTGATCTGGGGCCAG 616
          |||
Sbjct 181 AGGATGCCCAGAAGGTACCCATAGGTAACAAGCGACACTATGGATCTGATCTGGGGCCAG 240

Query 617 GTACCTCTAT 626

```



Strand=Plus/Plus

```
Query 377 ACATTTTGCTGCAAAGCATCCTATTGCCAGCGGAACAACACCTGGTAACAGGTGCCTCTG 436
          ||||| ||| ||||||||||||||||||||||||||||||||||||||||||||
Sbjct 251 ACATTTAGCTGTAAAGCATCCTATTGCCAGCGGAACAACACCTGGTAACAGGTGCCTCTG 310

Query 437 GGGCCAAAAGCCAAGGTCTAACAAACCCTTTAGGATTGGTTCTAAACCTGAGATGTTGTG 496
          ||||||||| ||||||||||||||||||||||||||||||||||||||||||||
Sbjct 311 GGGCCAAAAGCCAAGGTCTAACAAACCCTTTAGGATTGGTTCTAAACCTGAGATGTTGTG 370

Query 497 GAAGATACTTAGTACCTGCCGATCTGGTAGTACTGCAAACACTAGTTGTAAGGCCACGA 556
          ||||||||| ||||||||||||||||||||||||||||||||||||||||||||
Sbjct 371 GAAGATACTTAGTACCTACCGATCTGGTAGTAGTGCAAACACTAGTTGTAAGGCCACGA 430

Query 557 AGGATGCCCAGAAGGTACCCATAGGTAACAAGTGACACTATGGATCTGATCTGGGGCCAG 616
          ||||||||| ||||||||| ||| | ||||| ||||||||||||||||||||
Sbjct 431 AGGATGCCCAGAAGGTACCCAAAGGTAACAAGCGACCCCATGGAACCTGATCTGGGGCCAG 490

Query 617 GTACCTCTA 625
          | ||| |||
Sbjct 491 GGACCCCTA 499
```

>SRR2298573.400359 400359 length=500  
Length=500

Score = 429 bits (232), Expect = 7e-116  
Identities = 244/250 (98%), Gaps = 0/250 (0%)  
Strand=Plus/Minus

```
Query 445 AGCCAAGGTCTAACAAACCCTTTAGGATTGGTTCTAAACCTGAGATGTTGTGGAAGATAC 504
          ||||||||| ||||||||||||||||||||||||||||||||||||||||||||
Sbjct 500 AGCCAAGGTTTAAACAAACCCTTTAGGATTGGTTCTAAACCTGAGATGTTGTGGAAGATAC 441

Query 505 TTAGTACCTGCCGATCTGGTAGTACTGCAAACACTAGTTGTAAGGCCACGAAGGATGCC 564
          ||||||||| ||||||||||||||||||||||||||||||||||||||||||||
Sbjct 440 TTAGTACCTACCGATCTGGTAGTAGTGCAAACACTAGTTGTAAGGCCACGAAGGATGCC 381

Query 565 CAGAAGGTACCCATAGGTAACAAGTGACACTATGGATCTGATCTGGGGCCAGGTACCTCT 624
          ||||||||| ||||||||||||||||||||||||||||||||||||||||||||
Sbjct 380 CAGAAGGTACCCATAGGTAACAAGCGACACTATGGATCTGATCTGGGGCCAGGTACCTCT 321

Query 625 ATCTTGGTGACCTGGTTAAAAAGCGTCTAGTGGGCCAAACCCgggggggATCCCCGGTTT 684
          ||||||||| ||||||||||||||||||||||||||||||||||||||||||||
Sbjct 320 ATCTTGGTGATCTGGTTAAAAAACGCTCTAGTGGGCCAAACCCGGGGGGGATCCCCGGTTT 261

Query 685 CCTTTTATTT 694
          |||||||||
Sbjct 260 CCTTTTATTT 251
```

Score = 416 bits (225), Expect = 6e-112  
Identities = 241/249 (97%), Gaps = 0/249 (0%)  
Strand=Plus/Plus

```
Query 417 CCTGGTAACAGGTGCCTCTGGGGCCAAAAGCCAAGGTCTAACAAACCCTTTAGGATTGGT 476
          ||||||||| ||||||||||||||||||||||||||||||||||||||||||||
Sbjct 1 CCTGGTAACAGGTGCCTCTGGGGCCAAAAGCCAAGGTTTAAACAAACCCTTTAGGATTGGT 60
```

```

Query 477 TCTAAACCTGAGATGTTGTGGAAGATACTTAGTACCTGCCGATCTGGTAGTACTGCAAAC 536
          |||
Sbjct 61 TCTAAACCTGAGATGTTGTGGAAGATACTTAGTACCTACCGATCTGGTAGTAGTGCAAAC 120

Query 537 ACTAGTTGTAAGGCCACGAAGGATGCCCAGAAGGTACCCATAGGTAACAAGTGACACTA 596
          |||
Sbjct 121 ACTAGTTGTAAGGCCACGAAGGATGCCCAGAAGGTACCCATAGGTAACAAGCGACACTA 180

Query 597 TGGATCTGATCTGGGGCCAGGTACCTCTATCTTGGTGACCTGGTTAAAAAGCGTCTAGTG 656
          |||
Sbjct 181 TGGATCTGATCTGGGGCCAGGTACCTCTATCTTGGGGATCTGGTTAAAAAACGTCTAGGG 240

Query 657 GGCCAAACC 665
          |||
Sbjct 241 GGCCAAACC 249

```

>SRR2298573.372955 372955 length=500  
Length=500

Score = 429 bits (232), Expect = 7e-116  
Identities = 244/250 (98%), Gaps = 0/250 (0%)  
Strand=Plus/Plus

```

Query 420 GGTAACAGGTGCCTCTGGGGCCAAAAGCCAAGGTCTAACAAACCCTTTAGGATTGGTTCT 479
          |||
Sbjct 1 GGTAACAGGTGCCTCTGGGGCCAAAAGCCAAGGTTAACAAACCCTTTAGGATTGGTTCT 60

Query 480 AAACCTGAGATGTTGTGGAAGATACTTAGTACCTGCCGATCTGGTAGTACTGCAAACACT 539
          |||
Sbjct 61 AAACCTGAGATGTTGTGGAAGATACTTAGTACCTACCGATCTGGTAGTAGTGCAAACACT 120

Query 540 AGTTGTAAGGCCACGAAGGATGCCCAGAAGGTACCCATAGGTAACAAGTGACACTATGG 599
          |||
Sbjct 121 AGTTGTAAGGCCACGAAGGATGCCCAGAAGGTACCCATAGGTAACAAGCGACACTATGG 180

Query 600 ATCTGATCTGGGGCCAGGTACCTCTATCTTGGTGACCTGGTTAAAAAGCGTCTAGTGGGC 659
          |||
Sbjct 181 ATCTGATCTGGGGCCAGGTACCTCTATCTTGGTGATCTGGTTAAAAAACGTCTAGTGGGC 240

Query 660 CAAACCCggg 669
          |||
Sbjct 241 CAAACCCGGG 250

```

Score = 355 bits (192), Expect = 1e-93  
Identities = 231/250 (92%), Gaps = 1/250 (0%)  
Strand=Plus/Minus

```

Query 483 CCTGAGATGTTGTGGAAGATACTTAGTACCTGCCGATCTGGTAGTACTGCAAACACTAGT 542
          |||
Sbjct 499 CCTGGGATTTTGTGGAAGTTACTTTGTTCCCTCCGTTTGGGTAGTAGTGCAAACCTAGT 440

Query 543 TGTAAGGCCACGAAGGATGCCCAGAAGGTACCCATAGGTAACAAGTGACACTATGGATC 602
          |||
Sbjct 439 TGTAAGGCCACGAAGGATGCCCAGAAGGTACCCATAGGTAACAAGCGACACTATGGATC 380

Query 603 TGATCTGGGGCCAGGTACCTCTATCTTGGTGACCTGGTTAAAAAGCGTCTAGTGGGCCAA 662
          |||

```



```

Sbjct 379 TGATCTGGGGCCAGGTACCTCTATCTTGGTGATCTGGTTAAAAAACGTCTAGTGGGCCAA 320
Query 663 ACCCGgggggggATCCCCGGTTTCCTTTTATTTTATCAATGCTACAATGGAGACAATTAAA 722
      |||||
Sbjct 319 ACCCGGGGGG-ATCACCGGTTTCCTTTTATTTTATCAATGCCACTATGGAGACAATTAAAG 261
Query 723 AGTATTGCAG 732
      |||||
Sbjct 260 AGTATTGCAG 251

```

>SRR2298573.356978 356978 length=500  
Length=500

Score = 429 bits (232), Expect = 7e-116  
Identities = 244/250 (98%), Gaps = 0/250 (0%)  
Strand=Plus/Minus

```

Query 430 GCCTCTGGGGCCAAAAGCCAAGGTCTAACAAACCCTTTAGGATTGGTTCTAAACCTGAGA 489
      |||||
Sbjct 250 GCCTCTGGGGCCAAAAGCCAAGGTCTAACAAACCCTTTAGGATTGGTTCTAAACCTGAGA 191
Query 490 TGTTGTGGAAGATACTTAGTACCTGCCGATCTGGTAGTACTGCAAACACTAGTTGTAAGG 549
      |||||
Sbjct 190 TGTTGTGGAAGATACTTAGTACCTACCGATCTGGTAGTACTGCAAACACTAGTTGTAAGG 131
Query 550 CCCACGAAGGATGCCCGAAGGTACCCATAGGTAACAAGTGACACTATGGATCTGATCTG 609
      |||||
Sbjct 130 CCCACGAAGGATGCCCGAAGGTACCCATAGGTAACAAGCGACACTATGGATCTGATCTG 71
Query 610 GGGCCAGGTACCTCTATCTTGGTGACCTGGTTAAAAAGCGTCTAGTGGGCCAAAACCCggg 669
      |||||
Sbjct 70 GGGCCAGGTACCTCTATCTTGGTGATCTGGTTAAAAAACGTCTAGTGGGCCAAAACCCGGG 11
Query 670 ggggATCCCC 679
      |||||
Sbjct 10 GGGGATCCCC 1

```

Score = 363 bits (196), Expect = 7e-96  
Identities = 235/254 (93%), Gaps = 2/254 (1%)  
Strand=Plus/Plus

```

Query 340 GAGACGTCTGGTGACGTGTGGGAACCTTATTGGAAGCAACATTTTGCTGCAAAGCATCCTA 399
      |||
Sbjct 246 GAGGCGTCTGGTGACGTGTGGGAACCTTATTGGAACAACATTTTGCTGTAAAGCATCCTA 305
Query 400 TTGCCAGCGGAACAACACCTGGTAACAGGTGCCCTCTGGGGCCAAAAGCCAAGGTCTAACA 459
      |||||
Sbjct 306 TTGCCAGCGGAACAACACCTGGTAACAGGTGCCCTCTGGGGCCAAAAGCCAAGGTTTAAACA 365
Query 460 AACCCTTTAGGATTGGTTCTAAACCTGAGATGTTGTGGAAGATACTTAGTACCTGCCGAT 519
      |||||
Sbjct 366 AACCCTTTAGGATTGGTTCTAAACCTGAGATGTTGTGGAAGATACTTAGTACCTACCGAT 425
Query 520 CTGGTAGTACTGCAAACACTAGTTGTAAGGCCACGAAGGATGCCCGAAGGTACC-CAT 578
      ||||
Sbjct 426 CTGGAAGTATGGCAAACACTAATTGAAAGGCCCCCGAAGGAGGCCAAAAGGGACCGCAG 485

```

Query 579 AGGTAACAAGTGAC 592  
|| ||||| |||  
Sbjct 486 -GGAAACAAGGGAC 498

>SRR2298573.318184 318184 length=500  
Length=500

Score = 429 bits (232), Expect = 7e-116  
Identities = 244/250 (98%), Gaps = 0/250 (0%)  
Strand=Plus/Plus

Query 396 CCTATTGCCAGCGGAACAACACCTGGTAACAGGTGCCTCTGGGGCCAAAAGCCAAGGTCT 455  
|||||  
Sbjct 1 CCTATTGCCAGCGGAACAACACCTGGTAACAGGTGCCTCTGGGGCCAAAAGCCAAGGTTT 60

Query 456 AACAAACCCCTTTAGGATTGGTTCTAAACCTGAGATGTTGTGGAAGATACTTAGTACCTGC 515  
|||||  
Sbjct 61 AACAAACCCCTTTAGGATTGGTCTAAACCTGAGATGTTGTGGAAGATACTTAGTACCTAC 120

Query 516 CGATCTGGTAGTACTGCAAACACTAGTTGTAAGGCCACGAAGGATGCCCAGAAGGTACC 575  
|||||  
Sbjct 121 CGATCTGGTAGTACTGCAAACACTAGTTGTAAGGCCACGAAGGATGCCCAGAAGGTACC 180

Query 576 CATAGGTAACAAGTGACACTATGGATCTGATCTGGGGCCAGGTACCTCTATCTTGGTGAC 635  
|||||  
Sbjct 181 CATAGGTAACAAGCGACACTATGGATCTGATCTGGGGCCAGGTACCTCTATCTTGGGGAC 240

Query 636 CTGGTTAAAA 645  
|||||  
Sbjct 241 CTGGTTAAAA 250

Score = 394 bits (213), Expect = 3e-105  
Identities = 237/249 (95%), Gaps = 0/249 (0%)  
Strand=Plus/Minus

Query 458 CAAACCCCTTTAGGATTGGTTCTAAACCTGAGATGTTGTGGAAGATACTTAGTACCTGCCG 517  
|||||  
Sbjct 499 CAAACCCCTTTAGGATTGGTCTAAACCTGGGTTGTTGTGGAATATCTTAGTACCTACCG 440

Query 518 ATCTGGTAGTACTGCAAACACTAGTTGTAAGGCCACGAAGGATGCCCAGAAGGTACCCA 577  
|||||  
Sbjct 439 ATCTGGTAGTACTGCAAACCCCTAGTTGTAAGGCCACGAAGGATGCCCAGAAGGTACCCA 380

Query 578 TAGGTAACAAGTGACACTATGGATCTGATCTGGGGCCAGGTACCTCTATCTTGGTGACCT 637  
|||||  
Sbjct 379 TAGGTAACAAGCGACACTATGGATCTGATCTGGGGCCAGGTACCTCTATCTTGGTGATCT 320

Query 638 GGTTAAAAAGCGTCTAGTGGGCCAAACCCgggggggATCCCCGTTTCCTTTTATTTTAT 697  
|||||  
Sbjct 319 GGTTAAAAAACGTCTAGTGGGCCAAACCCGGGGGGGATCCCCGTTTCCTTTTATTTTAT 260

Query 698 CAATGCTAC 706  
|||||  
Sbjct 259 CAATGCCAC 251

>SRR2298573.314513 314513 length=500

Length=500

Score = 429 bits (232), Expect = 7e-116  
Identities = 244/250 (98%), Gaps = 0/250 (0%)  
Strand=Plus/Minus

```
Query 378 CATTTTGCTGCAAAGCATCCTATTGCCAGCGGAACAACACCTGGTAACAGGTGCCTCTGG 437
          |||
Sbjct 250 CATTTTGCTGTAAAGCATCCTATTGCCAGCGGAACAACCCCTGGTAACAGGTGCCTCTGG 191

Query 438 GGCCAAAAGCCAAGGTCTAACAAACCCCTTTAGGATTGGTTCTAAACCTGAGATGTTGTGG 497
          |||
Sbjct 190 GGCCAAAAGCCAAGGTTTAACAAACCCCTTTAGGATTGGTTCTAAACCTGAGATGTTGTGG 131

Query 498 AAGATACTTAGTACCTGCCGATCTGGTAGTACTGCAAACACTAGTTGTAAGGCCACGAA 557
          |||
Sbjct 130 AAGATACTTAGTACCTACCGATCTGGTAGTACTGCAAACACTAGTTGTAAGGCCACGAA 71

Query 558 GGATGCCCAGAAGGTACCCATAGGTAACAAGTGACACTATGGATCTGATCTGGGGCCAGG 617
          |||
Sbjct 70 GGATGCCCAGAAGGTACCCATAGGTAACAAGCGACACTATGGATCTGATCTGGGGCCAGG 11

Query 618 TACCTCTATC 627
          |||
Sbjct 10 TACCTCTATC 1
```

Score = 425 bits (230), Expect = 9e-115  
Identities = 242/248 (98%), Gaps = 0/248 (0%)  
Strand=Plus/Plus

```
Query 324 CCTCTAGTAAGTTTGTGAGACGTCTGGTGACGTGTGGGAACCTATTGGAAGCAACATTTT 383
          |||
Sbjct 251 CCTCTAGTAAGTTTGTGAGACGTCTGGTGACGTGTGGGAACCTATTGGAACAACATTTT 310

Query 384 GCTGCAAAGCATCCTATTGCCAGCGGAACAACACCTGGTAACAGGTGCCTCTGGGGCCAA 443
          |||
Sbjct 311 GCTGTAAAGCATCCTATTGCCAGCGGAACAACACCTGGTAACAGGTGCCTCTGGGGCCAA 370

Query 444 AAGCCAAGGTCTAACAAACCCCTTTAGGATTGGTTCTAAACCTGAGATGTTGTGGAAGATA 503
          |||
Sbjct 371 AAGCCAAGGTTTAACAAACCCCTTTAGGATTGGTTCTAAACCTGAGATGTTGTGGAAGATA 430

Query 504 CTTAGTACCTGCCGATCTGGTAGTACTGCAAACACTAGTTGTAAGGCCACGAAGGATGC 563
          |||
Sbjct 431 CTTAGTACCTACCGATCTGGTAGTACTGCAAACACTAGTTGTAAGGCCACGAAGGATGC 490

Query 564 CCAGAAGG 571
          ||
Sbjct 491 CCGGAAGG 498
```

>SRR2298573.309719 309719 length=500  
Length=500

Score = 429 bits (232), Expect = 7e-116  
Identities = 244/250 (98%), Gaps = 0/250 (0%)  
Strand=Plus/Plus

```

Query 396 CCTATTGCCAGCGGAACAACACCTGGTAACAGGTGCCTCTGGGGCCAAAAGCCAAGGTCT 455
          |||
Sbjct 1 CCTATTGCCAGCGGAACAACACCTGGTAACAGGTGCCTCTGGGGCCAAAAGCCAAGGTTT 60

Query 456 AACAAACCCCTTTAGGATTGGTTCTAAACCTGAGATGTTGTGGAAGATACTTAGTACCTGC 515
          |||
Sbjct 61 AACAAACCCCTTTAGGATTGGTTCTAAACCTGAGATGTTGTGGAAGATACTTAGTACCTAC 120

Query 516 CGATCTGGTAGTACTGCAAACACTAGTTGTAAGGCCACGAAGGATGCCAGAAAGGTACC 575
          |||
Sbjct 121 CGATCTGGTAGTACTGCAAACACTAGTTGTAAGGCCACGAAGGATGCCAGAAAGGTACC 180

Query 576 CATAGGTAACAAGTGACACTATGGATCTGATCTGGGGCCAGGTACCTCTATCTTGGTGAC 635
          |||
Sbjct 181 CATAGGTAACAAGCGACACTATGGATCTGATCTGGGGCCAGGTACCTCTATCTTGGGGAT 240

Query 636 CTGGTTAAAA 645
          |||
Sbjct 241 CTGGTTAAAA 250

```

Score = 381 bits (206), Expect = 2e-101  
Identities = 238/254 (94%), Gaps = 0/254 (0%)  
Strand=Plus/Minus

```

Query 475 GTTCTAAACCTGAGATGTTGTGGAAGATACTTAGTACCTGCCGATCTGGTAGTACTGCAA 534
          |||
Sbjct 500 GTTTTAAACCTGAGATGTTTTGGAAAATCCTTAGTTCCCTACCGATTTGGTAGTAGTGCAA 441

Query 535 ACACTAGTTGTAAGGCCACGAAGGATGCCAGAAAGGTACCCATAGGTAACAAGTGACAC 594
          |||
Sbjct 440 ACCCTAGTTGTAAGGCCACGAAGGATGCCAGAAAGGTACCCATAGGTAACAAGCGACAC 381

Query 595 TATGGATCTGATCTGGGGCCAGGTACCTCTATCTTGGTGACCTGGTTAAAAAAGCGTCTAG 654
          |||
Sbjct 380 TATGGATCTGATCTGGGGCCAGGTACCTCTATCTTGGTGATCTGGTTAAAAAAGCGTCTAG 321

Query 655 TGGGCCAAAACCCgggggggATCCCCGGTTTCCTTTTATTTTATCAATGCTACAATGGAGA 714
          |||
Sbjct 320 TGGGCCAAAACCCGGGGGGGATCCCCGGTTTCCTTTTATTTTATCAATGCCACTATGGAGA 261

Query 715 CAATTAAAAGTATT 728
          |||
Sbjct 260 CAATTAAGAGTTTT 247

```

>SRR2298573.304269 304269 length=500  
Length=500

Score = 429 bits (232), Expect = 7e-116  
Identities = 249/257 (97%), Gaps = 2/257 (1%)  
Strand=Plus/Minus

```

Query 372 AAGCAACATTTTGCTGCAAAGCATCCTATTGCCAGCGGAACAACACCTGGTAACAGGTGC 431
          |||
Sbjct 255 AAGC-AC-TTTTGCTGTAAAGCAACCTATTGCCAGCGGAACAACACCTGGTAACAGGTGC 198

Query 432 CTCTGGGGCCAAAAGCCAAGGTCTAACAAACCCCTTTAGGATTGGTTCTAAACCTGAGATG 491
          |||

```

Sbjct 197 CTCTGGGGCCAAAAGCCAAGGTTTAAACAAAACCCCTTTAGGATTGGTTCTAAACCTGAGATG 138

Query 492 TTGTGGAAGATACTTAGTACCTGCCGATCTGGTAGTACTGCAAACACTAGTTGTAAGGCC 551  
 |||

Sbjct 137 TTGTGGAAGATACTTAGTACCTACCGATCTGGTAGTAGTGCAAACACTAGTTGTAAGGCC 78

Query 552 CACGAAGGATGCCCAGAAGGTACCCATAGGTAACAAGTGACACTATGGATCTGATCTGGG 611  
 |||

Sbjct 77 CACGAAGGATGCCCAGAAGGTACCCATAGGTAACAAGCGACACTATGGATCTGATCTGGG 18

Query 612 GCCAGGTACCTCTATCT 628  
 |||

Sbjct 17 GCCAGGTACCTCTATCT 1

Score = 366 bits (198), Expect = 6e-97  
 Identities = 222/234 (95%), Gaps = 0/234 (0%)  
 Strand=Plus/Plus

Query 295 GCTTGTGGACCTTATGCTCACACAGCCATCCTCTAGTAAGTTTGTGAGACGTCTGGTGAC 354  
 |||

Sbjct 252 GCTTGTGGACCTTATGCTCACACAGCCATCCTCCAGTAAGTTTGTGAGACGTCTGGTGAC 311

Query 355 GTGTGGGAACCTTATTGGAAGCAACATTTTGTCTGCAAAGCATCCTATTGCCAGCGGAACAA 414  
 | |||

Sbjct 312 GCGTGGGAACCTTATTGGAACAACATTTTGTCTGTAAGCATCCTATTGCCAGCGGAACAA 371

Query 415 CACCTGGTAACAGGTGCCTCTGGGGCCAAAAGCCAAGGTCTAACAAAACCCCTTTAGGATTG 474  
 |||

Sbjct 372 CACCTGGTAACAGGTGCCTCTGGGGCCAAAAGCCAAGGTTTAAACAAAACCCCTTTAGGATTG 431

Query 475 GTTCTAAACCTGAGATGTTGTGGAAGATACTTAGTACCTGCCGATCTGGTAGTA 528  
 |||

Sbjct 432 GTTCTAAACCTGAGAGGTGTTGAAAATTACTTAGTACCTACCGATTTGGTAGTA 485

>SRR2298573.271506 271506 length=500  
 Length=500

Score = 429 bits (232), Expect = 7e-116  
 Identities = 244/250 (98%), Gaps = 0/250 (0%)  
 Strand=Plus/Plus

Query 420 GGTAACAGGTGCCTCTGGGGCCAAAAGCCAAGGTCTAACAAAACCCCTTTAGGATTGGTTCT 479  
 |||

Sbjct 1 GGTAACAGGTGCCTCTGGGGCCAAAAGCCAAGGTTTAAACAAAACCCCTTTAGGATTGGTTCT 60

Query 480 AAACCTGAGATGTTGTGGAAGATACTTAGTACCTGCCGATCTGGTAGTACTGCAAACACT 539  
 |||

Sbjct 61 AAACCTGAGATGTTGTGGAAGATACTTAGTACCTACCGATCTGGTAGTAGTGCAAACACT 120

Query 540 AGTTGTAAGGCCACGAAGGATGCCCAGAAGGTACCCATAGGTAACAAGTGACACTATGG 599  
 |||

Sbjct 121 AGTTGTAAGGCCACGAAGGATGCCCAGAAGGTACCCATAGGTAACAAGCGACACTATGG 180

Query 600 ATCTGATCTGGGGCCAGGTACCTCTATCTTGGTGACCTGGTTAAAAAGCGTCTAGTGGGC 659  
 |||

Sbjct 181 ATCTGATCTGGGGCCAGGTACCTCTATCTTGGTGATCTGGTTAAAAAACGTCTAGTGGGC 240

Query 660 CAAACCCggg 669  
|||||||  
Sbjct 241 CAAACCCGGG 250

Score = 396 bits (214), Expect = 7e-106  
Identities = 239/251 (95%), Gaps = 1/251 (0%)  
Strand=Plus/Minus

Query 475 GTTCTAAACCTGAGATGTTGTGGAAGATACTTAGTACCTGCCGATCTGGTAGTACTGCAA 534  
||| ||||||||||||||||||||||| | ||| ||||| ||||||||||||||| |||||  
Sbjct 500 GTT-TAAACCTGAGATGTTGTGGAAGTTTCTTGGTACCTACCGATCTGGTAGTAGTGCAA 442

Query 535 ACACTAGTTGTAAGGCCACGAAGGATGCCCAGAAGGTACCCATAGGTAACAAGTGACAC 594  
||||||||||||||||||||||||||||||||||||||||||||||||||||| |||||  
Sbjct 441 ACACTAGTTGTAAGGCCACGAAGGATGCCCAGAAGGTACCCATAGGTAACAAGCGACAC 382

Query 595 TATGGATCTGATCTGGGGCCAGGTACCTCTATCTTGGTGACCTGGTTAAAAAGCGTCTAG 654  
||||||||||||||||||||||||||||||||||||||||||||||||||||| |||||  
Sbjct 381 TATGGATCTGATCTGGGGCCAGGTACCTCTATCTTGGTGATCTGGTTAAAAAAGCGTCTAG 322

Query 655 TGGGCCAAACCCgggggggATCCCCGTTTCCTTTTATTTTATCAATGCTACAATGGAGA 714  
||||||||||||||||||||||||||||||||||||||||||||||||||||| || |||||  
Sbjct 321 TGGGCCAAACCCGGGGGGGATCCCCGTTTCCTTTTATTTTATCAATGCCACTATGGAGA 262

Query 715 CAATTAAGAGT 725  
||||||| |||  
Sbjct 261 CAATTAAGAGT 251

>SRR2298573.248619 248619 length=500  
Length=500

Score = 429 bits (232), Expect = 7e-116  
Identities = 244/250 (98%), Gaps = 0/250 (0%)  
Strand=Plus/Plus

Query 409 GAACAACACCTGGTAACAGGTGCCTCTGGGGCCAAAAGCCAAGGTCTAACAAACCCTTTA 468  
|||||||||||||||||||||||||||||||||||||||||||||||||||||  
Sbjct 1 GAACAACACCTGGTAACAGGTGCCTCTGGGGCCAAAAGCCAAGGTCTAACAAACCCTTTA 60

Query 469 GGATTGGTTCTAAACCTGAGATGTTGTGGAAGATACTTAGTACCTGCCGATCTGGTAGTA 528  
|||||||||||||||||||||||||||||||||||||||||||||||||||||  
Sbjct 61 GGATTGGTTCTAAACCTGAGATGTTGTGGAAGATACTTAGTACCTACCGATCTGGTAGTA 120

Query 529 CTGCAAAACACTAGTTGTAAGGCCACGAAGGATGCCCAGAAGGTACCCATAGGTAACAAG 588  
|||||||||||||||||||||||||||||||||||||||||||||||||||||  
Sbjct 121 GTGCAAAACACTAGTTGTAAGGCCACGAAGGATGCCCAGAAGGTACCCATAGGTAACAAG 180

Query 589 TGACACTATGGATCTGATCTGGGGCCAGGTACCTCTATCTTGGTGACCTGGTTAAAAAGC 648  
||||||||||||||||||||||||||||||||||||||||||||||||||||| |  
Sbjct 181 CGACACTATGGATCTGATCTGGGGCCAGGTACCTCTATCTTGGTGATCTGGTTAAAAAAC 240

Query 649 GTCTAGTGGG 658  
|||||||  
Sbjct 241 GTCTAGTGGG 250

Score = 368 bits (199), Expect = 2e-97



```

Query 388 CAAAGCATCCTATTGCCAGCGGAACAACACCTGGTAACAGGTGCCTCTGGGGCCAAAAGC 447
          |||
Sbjct 438 TAAAGCATCCTATTGCCAGCGGAACAACCCCTGGTAACAGGTGCCTCTGGGGCCAAAAGC 379

Query 448 CAAGGTCTAACAAACCCTTTAGGATTGGTTCTAAACCTGAGATGTTGTGGAAGATACTTA 507
          |||
Sbjct 378 CAAGGTTAACAAACCCTTTAGGATTGGTTCTAAACCTGAGATGTTGTGGAAGATACTTA 319

Query 508 GTACCTGCCGATCTGGTAGTACTGCAAACACTAGTTGTAAGGCCACGAAGGATGCCCGAG 567
          |||
Sbjct 318 GTACCTACCGATCTGGTAGTACTGCAAACACTAGTTGTAAGGCCACGAAGGATGCCCGAG 259

Query 568 AAGGTACCC 576
          |||
Sbjct 258 AAGGTACCC 250

```

>SRR2298573.246257 246257 length=500  
Length=500

Score = 429 bits (232), Expect = 7e-116  
Identities = 244/250 (98%), Gaps = 0/250 (0%)  
Strand=Plus/Plus

```

Query 409 GAACAACACCTGGTAACAGGTGCCTCTGGGGCCAAAAGCCAAGGTCTAACAAACCCTTTA 468
          |||
Sbjct 1 GAACAACACCTGGTAACAGGTGCCTCTGGGGCCAAAAGCCAAGGTTAACAAACCCTTTA 60

Query 469 GGATTGGTTCTAAACCTGAGATGTTGTGGAAGATACTTAGTACCTGCCGATCTGGTAGTA 528
          |||
Sbjct 61 GGATTGGTTCTAAACCTGAGATGTTGTGGAAGATACTTAGTACCTACCGATCTGGTAGTA 120

Query 529 CTGCAAACACTAGTTGTAAGGCCACGAAGGATGCCCAGAAGGTACCCATAGGTAACAAG 588
          |||
Sbjct 121 GTGCAAACACTAGTTGTAAGGCCACGAAGGATGCCCAGAAGGTACCCATAGGTAACAAG 180

Query 589 TGACACTATGGATCTGATCTGGGGCCAGGTACCTCTATCTTGGTGACCTGGTTAAAAAGC 648
          |||
Sbjct 181 CGACACTATGGATCTGATCTGGGGCCAGGTACCTCTATCTTGGTGAACCTGGTTAAAAAAC 240

Query 649 GTCTAGTGGG 658
          |||
Sbjct 241 GTCTAGTGGG 250

```

Score = 424 bits (229), Expect = 3e-114  
Identities = 243/250 (97%), Gaps = 0/250 (0%)  
Strand=Plus/Minus

```

Query 417 CCTGGTAACAGGTGCCTCTGGGGCCAAAAGCCAAGGTCTAACAAACCCTTTAGGATTGGT 476
          |||
Sbjct 500 CCTGGTAACCGGTGCCTCTGGGGCCAAAAGCCAAGGTTAACAAACCCTTTAGGATTGGT 441

Query 477 TCTAAACCTGAGATGTTGTGGAAGATACTTAGTACCTGCCGATCTGGTAGTACTGCAAAC 536
          |||
Sbjct 440 TCTAAACCTGAGATGTTGTGGAAGATACTTAGTACCTACCGATCTGGTAGTACTGCAAAC 381

Query 537 ACTAGTTGTAAGGCCACGAAGGATGCCCAGAAGGTACCCATAGGTAACAAGTGACACTA 596

```





Query 526 GTACTGCAAA 535  
||| |||||  
Sbjct 490 GTAGTGCAAA 499

>SRR2298573.223650 223650 length=500  
Length=500

Score = 429 bits (232), Expect = 7e-116  
Identities = 244/250 (98%), Gaps = 0/250 (0%)  
Strand=Plus/Minus

Query 345 GTCTGGTGACGTGTGGGAACTTATTGGAAGCAACATTTTGCTGCAAAGCATCCTATTGCC 404  
|||||

Sbjct 250 GTCTGGTGACGTGTGGGAACTTATTGGAACAACATTTTGCTGTAAAGCATCCTATTGCC 191

Query 405 AGCGGAACAACACCTGGTAACAGGTGCCTCTGGGGCCAAAAGCCAAGGTCTAACAAACCC 464  
|||||

Sbjct 190 AGCGGAACAACACCTGGTAACAGGTGCCTCTGGGGCCAAAAGCCAAGGTTTAAACAAACCC 131

Query 465 TTTAGGATTGGTTCTAAACCTGAGATGTTGTGGAAGATACTTAGTACCTGCCGATCTGGT 524  
|||||

Sbjct 130 TTTAGGATTGGTTCTAAACCTGAGATGTTGTGGAAGATACTTAGTACCTACCGATCTGGT 71

Query 525 AGTACTGCAAACACTAGTTGTAAGGCCACGAAGGATGCCCAGAAGGTACCCATAGGTAA 584  
|||||

Sbjct 70 AGTAGTGCAAACACTAGTTGTAAGGCCACGAAGGATGCCCAGAAGGTACCCATAGGTAA 11

Query 585 CAAGTGACAC 594  
|||||

Sbjct 10 CAAGCGACAC 1

Score = 377 bits (204), Expect = 3e-100  
Identities = 230/243 (95%), Gaps = 0/243 (0%)  
Strand=Plus/Plus

Query 333 AGTTTGTGAGACGTCTGGTGACGTGTGGGAACTTATTGGAAGCAACATTTTGCTGCAAAG 392  
|||||

Sbjct 258 AGTTTGCAGACGTCTGGTGACGTGTGGGAACTTATTGGAACAACATTTTGCTGTAAAG 317

Query 393 CATCCTATTGCCAGCGGAACAACACCTGGTAACAGGTGCCTCTGGGGCCAAAAGCCAAGG 452  
|||||

Sbjct 318 CATCCTATTGCCAGCGGAACAACACCTGGTAACAGGTGCCTCTGGGGCCAAAAGCCAAGG 377

Query 453 TCTAACAAACCCCTTTAGGATTGGTTCTAAACCTGAGATGTTGTGGAAGATACTTAGTACC 512  
|

Sbjct 378 TTTAACAAACCCCTTTAGGATTGGTTCTAAACCTGAGATGTTGTGGAAGATACTTAGTACC 437

Query 513 TGCCGATCTGGTAGTACTGCAAACACTAGTTGTAAGGCCACGAAGGATGCCCAGAAGGT 572  
|

Sbjct 438 TACCGATCTGGTAGTAGGGCAAACCCAGTTTAAAGGCCACGAAGGATGCCCAGAAGGG 497

Query 573 ACC 575  
|||

Sbjct 498 ACC 500

>SRR2298573.223439 223439 length=500  
Length=500

Score = 429 bits (232), Expect = 7e-116  
Identities = 244/250 (98%), Gaps = 0/250 (0%)  
Strand=Plus/Minus

```
Query 327 CTAGTAAGTTTGTGAGACGCTGGTGACGTGTGGGAACCTTATTGGAAGCAACATTTTGCT 386
          |||
Sbjct 500 CTAGTAAGTTTGTGGGACGCTGGTGACGTGTGGGAACCTTATTGGAACAACATTTTGCT 441

Query 387 GCAAAGCATCCTATTGCCAGCGGAACAACACCTGGTAACAGGTGCCTCTGGGGCCAAAAG 446
          |
Sbjct 440 GTAAAGCATCCTATTGCCAGCGGAACAACACCTGGTAACAGGTGCCTCTGGGGCCAAAAG 381

Query 447 CCAAGGTCTAACAAACCCTTTAGGATTGGTTCTAAACCTGAGATGTTGTGGAAGATACTT 506
          |||
Sbjct 380 CCAAGGTTTAAACAAACCCTTTAGGATTGGTTCTAAACCTGAGATGTTGTGGAAGATACTT 321

Query 507 AGTACCTGCCGATCTGGTAGTACTGCAAACACTAGTTGTAAGGCCACGAAGGATGCCCA 566
          |||
Sbjct 320 AGTACCTACCGATCTGGTAGTACTGCAAACACTAGTTGTAAGGCCACGAAGGATGCCCA 261

Query 567 GAAGGTACCC 576
          |||
Sbjct 260 GAAGGTACCC 251
```

Score = 414 bits (224), Expect = 2e-111  
Identities = 240/248 (97%), Gaps = 0/248 (0%)  
Strand=Plus/Plus

```
Query 312 TCACACAGCCATCCTCTAGTAAGTTTGTGAGACGCTGGTGACGTGTGGGAACCTTATTGG 371
          |||
Sbjct 1 TCACACAGCCATCCTCTAGTAAGTTTGTGAGACGCTGGTGACGTGTGGGAACCTTATTGG 60

Query 372 AAGCAACATTTTGCTGCAAAGCATCCTATTGCCAGCGGAACAACACCTGGTAACAGGTGC 431
          ||
Sbjct 61 AAACAACATTTTGCTGTAAAGCATCCTATTGCCAGCGGAACAACACCTGGTAACAGGTGC 120

Query 432 CTCTGGGGCCAAAAGCCAAGGTCTAACAAACCCTTTAGGATTGGTTCTAAACCTGAGATG 491
          |||
Sbjct 121 CTCTGGGGCCAAAAGCCAAGGTTTAAACAAACCCTTTAGGATTGGTTCTAAACCTGAGATG 180

Query 492 TTGTGGAAGATACTTAGTACCTGCCGATCTGGTAGTACTGCAAACACTAGTTGTAAGGCC 551
          |||
Sbjct 181 TTGTGGAAGATACTTAGTACCTACCGATCTGGTATAAAGTGCAAAAACCTAGTTGTAAGGCC 240

Query 552 CACGAAGG 559
          |||
Sbjct 241 CACGAAGG 248
```

>SRR2298573.223034 223034 length=500  
Length=500

Score = 429 bits (232), Expect = 7e-116  
Identities = 244/250 (98%), Gaps = 0/250 (0%)  
Strand=Plus/Minus

```

Query 330 GTAAGTTTGTGAGACGTCTGGTGACGTGTGGGAACTTATTGGAAGCAACATTTTGCTGCA 389
          |||
Sbjct 500 GTAAGTTTTTGTGAGACGTCTGGTGACGTGTGGGAACTTATTGGAACAACATTTTGCTGTA 441

Query 390 AAGCATCCTATTGCCAGCGGAACAACACCTGGTAACAGGTGCCTCTGGGGCCAAAAGCCA 449
          |||
Sbjct 440 AAGCATCCTATTGCCAGCGGAACAACACCTGGTAACAGGTGCCTCTGGGGCCAAAAGCCA 381

Query 450 AGGTCTAACAAAACCCCTTTAGGATTGGTTCTAAACCTGAGATGTTGTGGAAGATACTTAGT 509
          |||
Sbjct 380 AGGTTTAAACAAAACCCCTTTAGGATTGGTTCTAAACCTGAGATGTTGTGGAAGATACTTAGT 321

Query 510 ACCTGCCGATCTGGTAGTACTGCAAACACTAGTTGTAAGGCCACGAAGGATGCCAGAA 569
          |||
Sbjct 320 ACCTACCGATCTGGTAGTACTGCAAACACTAGTTGTAAGGCCACGAAGGATGCCAGAA 261

Query 570 GGTACCCATA 579
          |||
Sbjct 260 GGTACCCATA 251

```

Score = 405 bits (219), Expect = 1e-108  
Identities = 235/243 (97%), Gaps = 0/243 (0%)  
Strand=Plus/Plus

```

Query 281 TAGTGAGATAACCACGCTTGTGGACCTTATGCTCACACAGCCATCCTCTAGTAAGTTTGTG 340
          |||
Sbjct 7 TAGTGAGATAACCATGCTTGTGTACCTTATGCTCACACAGCCATCCTCTAGTAAGTTTGTG 66

Query 341 AGACGTCTGGTGACGTGTGGGAACTTATTGGAAGCAACATTTTGCTGCAAAGCATCCTAT 400
          |||
Sbjct 67 AGACGTCTGGTGACGTGTGGGAACTTATTGGAACAACATTTTGCTGTAAAGCATCCTAT 126

Query 401 TGCCAGCGGAACAACACCTGGTAACAGGTGCCTCTGGGGCCAAAAGCCAAGGTCTAACAA 460
          |||
Sbjct 127 TGCCAGCGGAACAACACCTGGTAACAGGTGCCTCTGGGGCCAAAAGCCAAGGTTTAAACAA 186

Query 461 ACCCTTTAGGATTGGTTCTAAACCTGAGATGTTGTGGAAGATACTTAGTACCTGCCGATC 520
          |||
Sbjct 187 ACCCTTTAGGATTGGTTCTAAACCTGAGAGGTTGTGGAAGAAACTTAGTACCTACCGATC 246

Query 521 TGG 523
          |||
Sbjct 247 TGG 249

```

>SRR2298573.207601 207601 length=500  
Length=500

Score = 429 bits (232), Expect = 7e-116  
Identities = 244/250 (98%), Gaps = 0/250 (0%)  
Strand=Plus/Minus

```

Query 415 CACCTGGTAACAGGTGCCTCTGGGGCCAAAAGCCAAGGTCTAACAAAACCCCTTTAGGATTG 474
          |||
Sbjct 500 CACCTGGTAACAGGTGCCTCTGGGGCCAAAAGCCAAGGTTTAAACAAAACCCCTTTAGGATTG 441

Query 475 GTTCTAAACCTGAGATGTTGTGGAAGATACTTAGTACCTGCCGATCTGGTAGTACTGCAA 534

```

```

Sbjct 440  |||
GTTCTAAACCTGAGATGTTGTGGAAGATACTTAGTACCTACCGATCTGGTAGTAGTGCAA 381
Query 535  ACACTAGTTGTAAGGCCACGAAGGATGCCAGAAAGGTACCCATAGGTAACAAGTGACAC 594
|||
Sbjct 380  ACACTAGTTGTAAGGCCACGAAGGATGCCAGAAAGGTACCCATAGGTAACAAGCGACAC 321
Query 595  TATGGATCTGATCTGGGGCCAGGTACCTCTATCTTGGTGACCTGGTTAAAAAGCGTCTAG 654
|||
Sbjct 320  TATGGATCTGATCTGGGGCCAGGTACCTCTATCTTGGTGATCTGGTTAAAAAACGCTCTAG 261
Query 655  TGGGCCAAAC 664
|||
Sbjct 260  TGGGCCAAAC 251

```

Score = 407 bits (220), Expect = 3e-109  
Identities = 243/254 (96%), Gaps = 2/254 (1%)  
Strand=Plus/Plus

```

Query 336  TTGTGAGACGTCTGGTGACGTGTGGGAACTTATTGGAAGCAACATTTTGCTGCAAAGCAT 395
|||
Sbjct 1    TTGTCAGACGTCTGGTGACGTGTGGGAACTTATTGGAACAACATTTTGCTGTAAAGCAT 60
Query 396  CCTATTGCCAGCGGAACAACACCTGGTAACAGGTGCCTCTGGGGCCAAAAGCCAAGGTCT 455
|||
Sbjct 61   CCTATTGCCAGCGGAACAACACCTGGTAACAGGTGCCTCTGGGGCCAAAAGCCAAGGTTT 120
Query 456  AACAAACCCTTTAGGATTGGTTCTAAACCTGAGATGTTGTGGAAGATACTTAGTACCTGC 515
|||
Sbjct 121  AACAAACCCTTTAGGATTGGTTCTAAACCTGAGATGTTGTGGAAGATACTTAGTACCTAC 180
Query 516  CGATCTGGTAGTACTGCAAACACTAGTTGTAAGGCCACGAAGGATGCCAGAAAGGTACC 575
|||
Sbjct 181  CGATCTGGTAGTACTGCAAACACTAGTTGTAAGGCCCCCGAAGGATGCCAGAAAGGGACC 240
Query 576  CATAGGTAACAAGT 589
|||
Sbjct 241  CATGGG-AA-AAGT 252

```

>SRR2298573.204285 204285 length=500  
Length=500

Score = 429 bits (232), Expect = 7e-116  
Identities = 244/250 (98%), Gaps = 0/250 (0%)  
Strand=Plus/Minus

```

Query 424  ACAGGTGCCTCTGGGGCCAAAAGCCAAGGTCTAACAAACCCTTTAGGATTGGTTCTAAAC 483
|||
Sbjct 250  ACAGGTGCCTCTGGGGCCAAAAGCCAAGGTTAACAAACCCTTTAGGATTGGTTCTAAAC 191
Query 484  CTGAGATGTTGTGGAAGATACTTAGTACCTGCCGATCTGGTAGTACTGCAAACACTAGTT 543
|||
Sbjct 190  CTGAGATGTTGTGGAAGATACTTAGTACCTACCGATCTGGTAGTAGTGCAAACACTAGTT 131
Query 544  GTAAGGCCACGAAGGATGCCAGAAAGGTACCCATAGGTAACAAGTGACACTATGGATCT 603
|||
Sbjct 130  GTAAGGCCACGAAGGATGCCAGAAAGGTACCCATAGGTAACAAGCGACACTATGGATCT 71

```

Query 604 GATCTGGGGCCAGGTACCTCTATCTTGGTGACCTGGTTAAAAAGCGTCTAGTGGGCCAAA 663  
 |||  
 Sbjct 70 GATCTGGGGCCAGGTACCTCTATCTTGGTGATCTGGTTAAAAAACGTCTAGTGGGCCAAA 11  
 Query 664 CCCggggggg 673  
 |||  
 Sbjct 10 CCCGGGGGGG 1

Score = 412 bits (223), Expect = 7e-111  
 Identities = 237/244 (97%), Gaps = 0/244 (0%)  
 Strand=Plus/Plus

Query 344 CGTCTGGTGACGTGTGGGAACCTTATTGGAAGCAACATTTTGCTGCAAAGCATCCTATTGC 403  
 |||  
 Sbjct 251 CGTCTGGTGACGTGTGGGAACCTTATTGGAACAACATTTTGCTGTAAAGCATCCTATTGC 310  
 Query 404 CAGCGGAACAACACCTGGTAACAGGTGCCTCTGGGGCCAAAAAGCCAAGGTCTAACAAAACC 463  
 |||  
 Sbjct 311 CAGCGGAACAACACCTGGTAACAGGTGCCTCTGGGGCCAAAAAGCCAAGGTTAACAAAACC 370  
 Query 464 CTTTAGGATTGGTTCTAAACCTGAGATGTTGTGGAAGATACTTAGTACCTGCCGATCTGG 523  
 |||  
 Sbjct 371 CTTTAGGATTGGTTCTAAACCTGAGATGTTGTGGAAGATACTTAGTACCTACCGATCTGG 430  
 Query 524 TAGTACTGCAAACACTAGTTGTAAGGCCACGAAGGATGCCCAGAAGGTACCCATAGGTA 583  
 |||  
 Sbjct 431 TAGTAGTGCAAACACTAGTTGTAAGGCCACGAAGGATGCCCAGAAGGGACCCATAGGGA 490  
 Query 584 ACAA 587  
 |||  
 Sbjct 491 ACAA 494

>SRR2298573.190220 190220 length=500  
 Length=500

Score = 429 bits (232), Expect = 7e-116  
 Identities = 244/250 (98%), Gaps = 0/250 (0%)  
 Strand=Plus/Plus

Query 446 GCCAAGGTCTAACAAACCCCTTAGGATTGGTTCTAAACCTGAGATGTTGTGGAAGATACT 505  
 |||  
 Sbjct 1 GCCAAGGTTTAACAAACCCCTTAGGATTGGTTCTAAACCTGAGATGTTGTGGAAGATACT 60  
 Query 506 TAGTACCTGCCGATCTGGTAGTACTGCAAACACTAGTTGTAAGGCCACGAAGGATGCC 565  
 |||  
 Sbjct 61 TAGTACCTACCGATCTGGTAGTACTGCAAACACTAGTTGTAAGGCCACGAAGGATGCC 120  
 Query 566 AGAAGGTACCCATAGGTAACAAGTGACACTATGGATCTGATCTGGGGCCAGGTACCTCTA 625  
 |||  
 Sbjct 121 AGAAGGTACCCATAGGTAACAAGCGACACTATGGATCTGATCTGGGGCCAGGTACCTCTA 180  
 Query 626 TCTTGGTGACCTGGTTAAAAAGCGTCTAGTGGGCCAAAACCCgggggggATCCCCGGTTTC 685  
 |||  
 Sbjct 181 TCTTGGTGATCTGGTTAAAAAACGTCTAGTGGGCCAAAACCCGGGGGGGATCCCCGGTTTC 240  
 Query 686 CTTTTATTTT 695

Sbjct 241 ||||| CTTTTATTTT 250

Score = 414 bits (224), Expect = 2e-111  
Identities = 240/248 (97%), Gaps = 0/248 (0%)  
Strand=Plus/Minus

Query 503 ACTTAGTACCTGCCGATCTGGTAGTACTGCAAACACTAGTTGTAAGGCCACGAAGGATG 562  
|||||  
Sbjct 498 ACTTAGTACCTACCGATCTGGTAGTACTGCAAACACTAGTTGTAAGGCCACGAAGGATG 439

Query 563 CCCAGAAGGTACCCATAGGTAACAAGTGACACTATGGATCTGATCTGGGGCCAGGTACCT 622  
|||||  
Sbjct 438 CCCAGAAGGTACCCATAGGTAACAAGCGACACTATGGATCTGATCTGGGGCCAGGTACCT 379

Query 623 CTATCTTGGTGACCTGGTTAAAAAGCGTCTAGTGGGCCAAAACCCgggggggATCCCCGGT 682  
|||||  
Sbjct 378 CTATCTTGGTGATCTGGTTAAAAAACGTCTAGTGGGCCAAAACCCGGGGGGGATCCCCGGT 319

Query 683 TTCCTTTTATTTTATCAATGCTACAATGGAGACAATTAAAAAGTATTGCAGATATGGCGAC 742  
|||||  
Sbjct 318 TTCCTTTTATTTTATCAATGCCACTATGGAGACAATTAAAGAGTATTGCAGATATGGCGAC 259

Query 743 CGGAGTGG 750  
|||||  
Sbjct 258 CGGAGTGG 251

>SRR2298573.178633 178633 length=500  
Length=500

Score = 429 bits (232), Expect = 7e-116  
Identities = 244/250 (98%), Gaps = 0/250 (0%)  
Strand=Plus/Minus

Query 427 GGTGCCTCTGGGGCCAAAAGCCAAGGTCTAACAAAACCTTTAGGATTGGTTCTAAACCTG 486  
|||||  
Sbjct 250 GGTGCCTCTGGGGCCAAAAGCCAAGGTCTAACAAAACCTTTAGGATTGGTTCTAAACCTG 191

Query 487 AGATGTTGTGGAAGATACTTAGTACCTGCCGATCTGGTAGTACTGCAAACACTAGTTGTA 546  
|||||  
Sbjct 190 AGATGTTGTGGAAGATACTTAGTACCTACCGATCTGGTAGTACTGCAAACACTAGTTGTA 131

Query 547 AGGCCACGAAGGATGCCCAGAAGGTACCCATAGGTAACAAGTGACACTATGGATCTGAT 606  
|||||  
Sbjct 130 AGGCCACGAAGGATGCCCAGAAGGTACCCATAGGTAACAAGCGACACTATGGATCTGAT 71

Query 607 CTGGGGCCAGGTACCTCTATCTTGGTGACCTGGTTAAAAAGCGTCTAGTGGGCCAAAACCC 666  
|||||  
Sbjct 70 CTGGGGCCAGGTACCTCTATCTTGGTGATCTGGTTAAAAAACGTCTAGTGGGCCAAAACCC 11

Query 667 gggggggATC 676  
|||||  
Sbjct 10 GGGGGGGATC 1

Score = 427 bits (231), Expect = 3e-115  
Identities = 243/249 (98%), Gaps = 0/249 (0%)

Strand=Plus/Plus

```
Query 324 CCTCTAGTAAGTTTGTGAGACGTCTGGTGACGTGTGGGAACTTATTGGAAGCAACATTTT 383
      |||
Sbjct 251 CCTCTAGTAAGTTTGTGAGACGTCTGGTGACGTGTGGGAACTTATTGGAACAACATTTT 310

Query 384 GCTGCAAAGCATCCTATTGCCAGCGGAACAACACCTGGTAACAGGTGCCTCTGGGGCCAA 443
      |||
Sbjct 311 GCTGTAAAGCATCCTATTGCCAGCGGAACAACACCTGGTAACAGGTGCCTCTGGGGCCAA 370

Query 444 AAGCCAAGGTCTAACAAACCCCTTTAGGATTGGTTCTAAACCTGAGATGTTGTGGAAGATA 503
      |||
Sbjct 371 AAGCCAAGGTCTAACAAACCCCTTTAGGATTGGTTCTAAACCTGAGATGTTGTGGAAGATA 430

Query 504 CTTAGTACCTGCCGATCTGGTAGTACTGCAAACACTAGTTGTAAGGCCACGAAGGATGC 563
      |||
Sbjct 431 CTTAGTACCTACCGATCTGGTAGTACTGCAAACACTAGTTGTAAGGCCCCGAAGGATGC 490

Query 564 CCAGAAGGT 572
      |||
Sbjct 491 CCAGAAGGT 499
```

>SRR2298573.167573 167573 length=500  
Length=500

Score = 429 bits (232), Expect = 7e-116  
Identities = 244/250 (98%), Gaps = 0/250 (0%)  
Strand=Plus/Minus

```
Query 436 GGGGCCAAAAGCCAAGGTCTAACAAACCCCTTTAGGATTGGTTCTAAACCTGAGATGTTGT 495
      |||
Sbjct 250 GGGGCCAAAAGCCAAGGTCTAACAAACCCCTTTAGGATTGGTTCTAAACCTGAGATGTTGT 191

Query 496 GGAAGATACTTAGTACCTGCCGATCTGGTAGTACTGCAAACACTAGTTGTAAGGCCACG 555
      |||
Sbjct 190 GGAAGATACTTAGTACCTACCGATCTGGTAGTACTGCAAACACTAGTTGTAAGGCCACG 131

Query 556 AAGGATGCCCAGAAAGGTACCCATAGGTAACAAGTGACACTATGGATCTGATCTGGGGCCA 615
      |||
Sbjct 130 AAGGATGCCCAGAAAGGTACCCATAGGTAACAAGTGACACTATGGATCTGATCTGGGGCCA 71

Query 616 GGTACCTCTATCTTGGTGACCTGGTTAAAAAGCGTCTAGTGGGCCAAACCCgggggggAT 675
      |||
Sbjct 70 GGTACCTCTATCTTGGTGATCTGGTTAAAAAACGTCTAGTGGGCCAAACCCGGGGGGGAT 11

Query 676 CCCC GGTTTC 685
      |||
Sbjct 10 CCCC GGTTTC 1
```

Score = 392 bits (212), Expect = 9e-105  
Identities = 236/248 (95%), Gaps = 0/248 (0%)  
Strand=Plus/Plus

```
Query 431 CCTCTGGGGCCAAAAGCCAAGGTCTAACAAACCCCTTTAGGATTGGTTCTAAACCTGAGAT 490
      |||
Sbjct 251 CCTCTGGGGCCAAAAGCCAAGGTCTAACAAACCCCTTTAGGATTGGTTCTAAACCTGAGAT 310
```



```

Query 491 GTTGTGGAAGATACTTAGTACCTGCCGATCTGGTAGTACTGCAAACACTAGTTGTAAGGC 550
          |||
Sbjct 311 GTTGTGGAAGATACTTAGTACCTACCGATCTGGTAGTAGTGCAAACACTAGTTGTAAGGC 370

Query 551 CCACGAAGGATGCCCAGAAGGTACCCATAGGTAACAAGTGACACTATGGATCTGATCTGG 610
          |||
Sbjct 371 CCACGAAGGATGCCCAGAAGGTACCCATAGGTAACAAGCGACACTATGGATCTGACCTGG 430

Query 611 GGCCAGGTACCTCTATCTTGGTGACCTGGTTAAAAAGCGTCTAGTGGGCCAAAACCCgggg 670
          |||
Sbjct 431 GGCCAGGAACCTCTATCTGGGGGACCTGGTTAAAAAACGCCAGGGGGCCAAAACCCGGGG 490

Query 671 gggATCCC 678
          |||
Sbjct 491 GGGATCCC 498

```

```

>SRR2298573.129131 129131 length=500
Length=500

```

```

Score = 429 bits (232), Expect = 7e-116
Identities = 244/250 (98%), Gaps = 0/250 (0%)
Strand=Plus/Plus

```

```

Query 394 ATCCTATTGCCAGCGGAACAACACCTGGTAACAGGTGCCTCTGGGGCCAAAAGCCAAGGT 453
          |||
Sbjct 1 ATCCTATTGCCAGCGGAACAACACCTGGTAACAGGTGCCTCTGGGGCCAAAAGCCAAGGT 60

Query 454 CTAACAAAACCCTTTAGGATTGGTTCTAAACCTGAGATGTTGTGGAAGATACTTAGTACCT 513
          |||
Sbjct 61 TTAACAAAACCCTTTAGGATTGGTTCTAAACCTGAGATGTTGTGGAAGATACTTAGTACCT 120

Query 514 GCCGATCTGGTAGTACTGCAAACACTAGTTGTAAGGCCACGAAGGATGCCCAGAAGGTA 573
          |||
Sbjct 121 ACCGATCTGGTAGTAGTGCAAACACTAGTTGTAAGGCCACGAAGGATGCCCAGAAGGTA 180

Query 574 CCCATAGGTAACAAGTGACACTATGGATCTGATCTGGGGCCAGGTACCTCTATCTTGGTG 633
          |||
Sbjct 181 CCCATAGGTAACAAGCGACACTATGGATCTGATCTGGGGCCAGGTACCTCTATCTTGGGG 240

Query 634 ACCTGGTTAA 643
          | |||
Sbjct 241 ATCTGGTTAA 250

```

```

Score = 372 bits (201), Expect = 1e-98
Identities = 233/249 (94%), Gaps = 0/249 (0%)
Strand=Plus/Minus

```

```

Query 629 TGGTGACCTGGTTAAAAAGCGTCTAGTGGGCCAAAACCCgggggggATCCCCGGTTTCCTT 688
          |||
Sbjct 496 TGGTGATCTGGTTAAAAAACGTCAGTGGGCCAAAACCCGGAGGGGATCCCCGGTTTCCTT 437

Query 689 TTATTTTATCAATGCTACAATGGAGACAATTAAGAGTATTGCAGATATGGCGACCGGAGT 748
          |||
Sbjct 436 TTATTTTAGCAATGCCACTATGGAGACAATTAAGAGTATTGCAGATATGGCGACCGGAGT 377

Query 749 GGTCAGTTCAGTTGATTCCACTATCAATGCAGTTAATGAGAGAGTAGAAAATGTGGGCAA 808
          |||

```

```

Sbjct 376 GGTCAGTTCAGTTGATTCCACTATGAATGTAGTTAATGAGAGAGTGGAAAAATGTAGGTAA 317
Query 809 TGAAATTGGAGGTAACCTATTAACCAAAGTAGCAGATGATGCTTCTAATGTGCTTGGACC 868
      |||
Sbjct 316 TGAAATTGGAGGTAATTTATTAACCAAAGTTGCAGATGATGCTTCTAATGTGCTCGGACC 257
Query 869 AAATTGTTA 877
      |||
Sbjct 256 AAATTGTTA 248

```

>SRR2298573.122310 122310 length=500  
Length=500

Score = 429 bits (232), Expect = 7e-116  
Identities = 244/250 (98%), Gaps = 0/250 (0%)  
Strand=Plus/Plus

```

Query 451 GGTCTAACAAAACCCCTTTAGGATTGGTTCTAAACCTGAGATGTTGTGGAAAGATACTTAGTA 510
      |||
Sbjct 1 GGTCTAACAAAACCCCTTTAGGATTGGTTCTAAACCTGAGATGTTGTGGAAAGATACTTAGTA 60
Query 511 CCTGCCGATCTGGTAGTACTGCAAACACTAGTTGTAAGGCCACGAAGGATGCCAGAAG 570
      |||
Sbjct 61 CCTACCGATCTGGTAGTACTGCAAACACTAGTTGTAAGGCCACGAAGGATGCCAGAAG 120
Query 571 GTACCCATAGGTAACAAGTGACACTATGGATCTGATCTGGGGCCAGGTACCTCTATCTTG 630
      |||
Sbjct 121 GTACCCATAGGTAACAAGCGACACTATGGATCTGATCTGGGGCCAGGTACCTCTATCTTG 180
Query 631 GTGACCTGGTTAAAAAGCGTCTAGTGGGCCAAACCCgggggggATCCCCGTTTCCTTTT 690
      |||
Sbjct 181 GTGATCTGGTTAAAAACGCTCTAGTGGGCCAAACCCGGGGGGGATCCCCGTTTCCTTTT 240
Query 691 ATTTTATCAA 700
      |||
Sbjct 241 ATTTTATCAA 250

```

Score = 379 bits (205), Expect = 7e-101  
Identities = 236/251 (94%), Gaps = 2/251 (1%)  
Strand=Plus/Minus

```

Query 499 AGATAC-TTAGTACCTGCCGATCTGGTAGTACTGCAAACACTAGTTGTAAGGCCACGAA 557
      |||
Sbjct 499 AGATACTTTAG-CCCTTGCGATTTGGTAGTTGTGCAAACACTTGTGTTAAGGCCACGAA 441
Query 558 GGATGCCAGAAGGTACCCATAGGTAACAAGTGACACTATGGATCTGATCTGGGGCCAGG 617
      |||
Sbjct 440 GGATGCCAGAAGGTACCCATAGGTAACAAGCGACACTATGGATCTGATCTGGGGCCAGG 381
Query 618 TACCTCTATCTTGGTGACCTGGTTAAAAAGCGTCTAGTGGGCCAAACCCgggggggATCC 677
      |||
Sbjct 380 TACCTCTATCTTGGTGATCTGGTTAAAAAACGCTCTAGTGGGCCAAACCCGGGGGGGATCC 321
Query 678 CCGGTTTCCTTTTATTTTATCAATGCTACAATGGAGACAATTAAGATATTGCAGATATG 737
      |||
Sbjct 320 CCGGTTTCCTTTTATTTTATCAATGCCACTATGGAGACAATTAAGAGTATTGCAGATATG 261

```



Length=500

Score = 429 bits (232), Expect = 7e-116  
Identities = 244/250 (98%), Gaps = 0/250 (0%)  
Strand=Plus/Minus

```
Query 321 CATCCTCTAGTAAGTTTGTGAGACGTCTGGTGACGTGTGGGAACTTATTGGAAGCAACAT 380
|||||
Sbjct 500 CATCCTCTAGTAAGTTTGTGAGACGTCTGGTGACGTGTGGGAACTTATTGGAACAACAT 441

Query 381 TTTGCTGCAAAGCATCCTATTGCCAGCGGAACAACACCTGGTAACAGGTGCCTCTGGGGC 440
|||||
Sbjct 440 TTTGCTGTAAGCATCCTATTGCCAGCGGAACAACACCTGGTAACAGGTGCCTCTGGGGC 381

Query 441 CAAAAGCCAAGGTCTAACAAACCCTTTAGGATTGGTTCTAAACCTGAGATGTTGTGGAAG 500
|||
Sbjct 380 CAAGAGCCAAGGTTTAAACAAACCCTTTAGGATTGGTTCTAAACCTGAGATGTTGTGGAAG 321

Query 501 ATACTTAGTACCTGCCGATCTGGTAGTACTGCAAACACTAGTTGTAAGGCCACGAAGGA 560
|||||
Sbjct 320 ATACTTAGTACCTACCGATCTGGTAGTAGTGCAAACACTAGTTGTAAGGCCACGAAGGA 261

Query 561 TGCCCAGAAG 570
|||||
Sbjct 260 TGCCCAGAAG 251
```

Score = 412 bits (223), Expect = 7e-111  
Identities = 239/247 (97%), Gaps = 0/247 (0%)  
Strand=Plus/Plus

```
Query 276 TCTACTAGTGAGATAACCACGCTTGTGGACCTTATGCTCACACAGCCATCCTCTAGTAAGT 335
|||||
Sbjct 4 TCTATTAGTGAGATAACCATGCTTGTGGACCTTATGCTCACACAGCCATCCTCTAGTAAGT 63

Query 336 TTGTGAGACGTCTGGTGACGTGTGGGAACTTATTGGAAGCAACATTTTGCTGCAAAGCAT 395
|||||
Sbjct 64 TTGTGAGACGTCTGGTGACGTGTGGGAACTTATTGGAACAACATTTTGCTGTAAGCAT 123

Query 396 CCTATTGCCAGCGGAACAACACCTGGTAACAGGTGCCTCTGGGGCCAAAAGCCAAGGTCT 455
|||||
Sbjct 124 CCTATTGCCAGCGGAACAACACCTGGTAACAGGTGCCTCTGGGGCCAAGAGCCAAGGTTT 183

Query 456 AACAAACCCTTTAGGATTGGTTCTAAACCTGAGATGTTGTGGAAGATACTTAGTACCTGC 515
|||||
Sbjct 184 AACAAACCCTTTAGGATTGGTTCTAAACCTGAGATGTTGTGGAATACTTAGTACCTAC 243

Query 516 CGATCTG 522
|||||
Sbjct 244 CGATCTG 250
```

>SRR2298573.96228 96228 length=500  
Length=500

Score = 429 bits (232), Expect = 7e-116  
Identities = 244/250 (98%), Gaps = 0/250 (0%)  
Strand=Plus/Minus

```

Query 407 CGGAACAACACCTGGTAACAGGTGCCTCTGGGGCCAAAAGCCAAGGTCTAACAAACCCTT 466
          |||
Sbjct 250 CGGAACAACACCTGGTAACAGGTGCCTCTGGGGCCAAAAGCCAAGGTTTAAACAAACCCTT 191

Query 467 TAGGATTGGTTCTAAACCTGAGATGTTGTGGAAGATACTTAGTACCTGCCGATCTGGTAG 526
          |||
Sbjct 190 TAGGATTGGTTCTAAACCTGAGATGTTGTGGAAGATACTTAGTACCTACCGATCTGGTAG 131

Query 527 TACTGCAAACACTAGTTGTAAGGCCACGAAGGATGCCCAGAAGGTACCCATAGGTAACA 586
          ||
Sbjct 130 TAGTGCAAACACTAGTTGTAAGGCCACGAAGGATGCCCAGAAGGTACCCATAGGTAACA 71

Query 587 AGTGACACTATGGATCTGATCTGGGGCCAGGTACCTCTATCTTGGTGACCTGGTTAAAAA 646
          ||
Sbjct 70 AGCGACACTATGGATCTGATCTGGGGCCAGGTACCTCTATCTTGGTGATCTGGTTAAAAA 11

Query 647 GCGTCTAGTG 656
          |||
Sbjct 10 ACGTCTAGTG 1

```

Score = 401 bits (217), Expect = 2e-107  
Identities = 239/250 (96%), Gaps = 0/250 (0%)  
Strand=Plus/Plus

```

Query 289 TACCACGCTTGTGGACCTTATGCTCACACAGCCATCCTCTAGTAAGTTTGTGAGACGTCT 348
          |||
Sbjct 251 TACCATGCTTGTGGACCTTATGCTCACACAGCCATCCTCTAGTAAGTTTGTGAGACGTCT 310

Query 349 GGTGACGTGTGGGAACTTATTGGAAGCAACATTTTGTCTGCAAAGCATCTATTGCCAGCG 408
          |||
Sbjct 311 GGTGACGTGTGGGAACTTATTGGAACAACATTTTGTCTGTAAAGCATCTATTGCCAGCG 370

Query 409 GAACAACACCTGGTAACAGGTGCCTCTGGGGCCAAAAGCCAAGGTCTAACAAACCCTTTA 468
          |||
Sbjct 371 GAACAACACCTGGTAACAGGTGCCTCTGGGGCCAAAAGCCAAGGTTTAAACAAACCCTTTA 430

Query 469 GGATTGGTTCTAAACCTGAGATGTTGTGGAAGATACTTAGTACCTGCCGATCTGGTAGTA 528
          |||
Sbjct 431 GGATTGGTTCTAAACCTGAGATGTTGTGGAACATACTTAGTACCTCCCGAGCTGGAGGTA 490

Query 529 CTGCAAACAC 538
          |||
Sbjct 491 GGGCAAACAC 500

```

>SRR2298573.90787 90787 length=500  
Length=500

Score = 429 bits (232), Expect = 7e-116  
Identities = 244/250 (98%), Gaps = 0/250 (0%)  
Strand=Plus/Minus

```

Query 421 GTAACAGGTGCCTCTGGGGCCAAAAGCCAAGGTCTAACAAACCCTTTAGGATTGGTTCTA 480
          |||
Sbjct 500 GTAACAGGTGCCTCTGGGGCCAAAAGCCAAGGTTTAAACAAACCCTTTAGGATTGGTTCTA 441

Query 481 AACCTGAGATGTTGTGGAAGATACTTAGTACCTGCCGATCTGGTAGTACTGCAAACACTA 540
          |||

```

Sbjct 440 AACCTGAGATGTTGTGGAAGATACTTAGTACCTACCGATCTGGTAGTAGTGCAAACACTA 381

Query 541 GTTGTAAAGGCCACGAAGGATGCCCAGAAGGTACCCATAGGTAACAAGTGACACTATGGA 600  
 |||

Sbjct 380 GTTGTAAAGGCCACGAAGGATGCCCAGAAGGTACCCATAGGTAACAAGCGACACTATGGA 321

Query 601 TCTGATCTGGGGCCAGGTACCTCTATCTTGGTGACCTGGTTAAAAAGCGTCTAGTGGGCC 660  
 |||

Sbjct 320 TCTGATCTGGGGCCAGGTACCTCTATCTTGGTGATCTGGTTAAAAAACGCTCTAGTGGGCC 261

Query 661 AAACCCgggg 670  
 |||

Sbjct 260 AAACCCGGGG 251

Score = 424 bits (229), Expect = 3e-114  
 Identities = 243/250 (97%), Gaps = 0/250 (0%)  
 Strand=Plus/Plus

Query 396 CCTATTGCCAGCGGAACAACACCTGGTAACAGGTGCCTCTGGGGCCAAAAGCCAAGGTCT 455  
 |||

Sbjct 1 CCTATTGCCAGCGGAACAACACCTGGTAACAGGTGCCTCTGGGGCCAAAAGCCAAGGTTT 60

Query 456 AACAAACCCTTTAGGATTGGTTCTAAACCTGAGATGTTGTGGAAGATACTTAGTACCTGC 515  
 |||

Sbjct 61 AACAAACCCTTTAGGATTGGTTCTAAACCTGAGATGTTGTGGAAGATACTTAGTACCTAC 120

Query 516 CGATCTGGTAGTACTGCAAACACTAGTTGTAAGGCCACGAAGGATGCCAGAAAGGTACC 575  
 |||

Sbjct 121 CGATCTGGTAGTACTGCAAACACTAGTTGTAAGGCCACGAAGGATGCCAGAAAGGTACC 180

Query 576 CATAGGTAACAAGTGACACTATGGATCTGATCTGGGGCCAGGTACCTCTATCTTGGTGAC 635  
 |||

Sbjct 181 CATAGGTAACAAGCGACACTATGGATCTGATCTGGGGCCAGGAACCTCAATCTTGGTGAT 240

Query 636 CTGGTTAAAA 645  
 |||

Sbjct 241 CTGGTTAAAA 250

>SRR2298573.71711 71711 length=500  
 Length=500

Score = 429 bits (232), Expect = 7e-116  
 Identities = 242/247 (98%), Gaps = 0/247 (0%)  
 Strand=Plus/Plus

Query 335 TTTGTGAGACGTCTGGTGACGTGTGGGAACTTATTGGAAGCAACATTTTGCTGCAAAGCA 394  
 |||

Sbjct 5 TTTGTGAGACGTCTGGTGACGTGTGGGAACTTATTGGAACAACATTTTGCTGTAAAGCA 64

Query 395 TCCTATTGCCAGCGGAACAACACCTGGTAACAGGTGCCTCTGGGGCCAAAAGCCAAGGTC 454  
 |||

Sbjct 65 TCCTATTGCCAGCGGAACAACACCTGGTAACAGGTGCCTCTGGGGCCAAAAGCCAAGGTT 124

Query 455 TAACAAACCCTTTAGGATTGGTTCTAAACCTGAGATGTTGTGGAAGATACTTAGTACCTG 514  
 |||

Sbjct 125 TAACAAACCCTTTAGGATTGGTTCTAAACCTGAGATGTTGTGGAAGATACTTAGTACCTA 184

Query 515 CCGATCTGGTAGTACTGCAAACACTAGTTGTAAGGCCACGAAGGATGCCAGAAAGGTAC 574  
 |||  
 Sbjct 185 CCGATCTGGTAGTACTGCAAACACTAGTTGTAAGGCCACGAAGGATGCCAGAAAGGTAC 244

Query 575 CCATAGG 581  
 |||  
 Sbjct 245 CCATAGG 251

Score = 390 bits (211), Expect = 3e-104  
 Identities = 237/250 (95%), Gaps = 0/250 (0%)  
 Strand=Plus/Minus

Query 481 AACCTGAGATGTTGTGGAAGATACTTAGTACCTGCCGATCTGGTAGTACTGCAAACACTA 540  
 |||  
 Sbjct 500 AACCTGAGATGTTGGGAAGATTCTTAGTACCTACCGATCTGGTAGTAGTGCAAACACTA 441

Query 541 GTTGTAAAGGCCACGAAGGATGCCAGAAAGGTACCCATAGGTAACAAGTGACACTATGGA 600  
 |||  
 Sbjct 440 GTTGTAAAGGCCACGAAGGATGCCAGAAAGGTACCCATAGGTAACAAGCGCACACTATGGA 381

Query 601 TCTGATCTGGGGCCAGGTACCTCTATCTTGGTGACCTGGTTAAAAAGCGTCTAGTGGGCC 660  
 |||  
 Sbjct 380 TCTGATCTGGGGCCAGGTACCTCTATCTTGGTGATCTGGTTAAAAACGTCTAGTGGGCC 321

Query 661 AAACCCgggggggATCCCCGGTTTCCTTTTATTTTATCAATGCTACAATGGAGACAATTA 720  
 || |||  
 Sbjct 320 AAACCCGGGGGGGATCCCCGGTTTCCTTTTATTGTATCAATGCCACTATGGAGACAATTA 261

Query 721 AAAGTATTGC 730  
 | |||  
 Sbjct 260 AGAGTATTGC 251

>SRR2298573.49960 49960 length=500  
 Length=500

Score = 429 bits (232), Expect = 7e-116  
 Identities = 244/250 (98%), Gaps = 0/250 (0%)  
 Strand=Plus/Plus

Query 445 AGCCAAGGTCTAACAAACCCTTTAGGATTGGTTCTAAACCTGAGATGTTGTGGAAGATAC 504  
 |||  
 Sbjct 1 AGCCAAGGTTTAAACAAACCCTTTAGGATTGGTTCTAAACCTGAGATGTTGTGGAAGATAC 60

Query 505 TTAGTACCTGCCGATCTGGTAGTACTGCAAACACTAGTTGTAAGGCCACGAAGGATGCC 564  
 |||  
 Sbjct 61 TTAGTACCTACCGATCTGGTAGTAGTGCAAACACTAGTTGTAAGGCCACGAAGGATGCC 120

Query 565 CAGAAGGTACCCATAGGTAACAAGTGACACTATGGATCTGATCTGGGGCCAGGTACCTCT 624  
 |||  
 Sbjct 121 CAGAAGGTACCCATAGGTAACAAGCGACACTATGGATCTGATCTGGGGCCAGGTACCTCT 180

Query 625 ATCTTGGTGACCTGGTTAAAAAGCGTCTAGTGGGCCAAACCCgggggggATCCCCGGTTT 684  
 |||  
 Sbjct 181 ATCTTGGTGATCTGGTTAAAAACGTCTAGTGGGCCAAACCCGGGGGGGATCCCCGGTTT 240

Query 685 CCTTTTATTT 694  
 |||

Sbjct 241 CCTTTTATTT 250

Score = 405 bits (219), Expect = 1e-108  
Identities = 239/249 (96%), Gaps = 0/249 (0%)  
Strand=Plus/Minus

```
Query 490 TGTGTGGAAGATACTTAGTACCTGCCGATCTGGTAGTACTGCAAACACTAGTTGTAAGG 549
          ||||| ||||| ||||| ||||| ||||| ||||| ||||| ||||| ||||| |||||
Sbjct 499 TGTGGGGAAGATTCTTAGTACCTACCGATCTGGTAGTAGTGCAAACACTAGTTGTAAGG 440

Query 550 CCCACGAAGGATGCCCAGAAGGTACCCATAGGTAACAAGTGACACTATGGATCTGATCTG 609
          ||||| ||||| ||||| ||||| ||||| ||||| ||||| ||||| |||||
Sbjct 439 CCCACGAAGGATGCCCAGAAGGTACCCATAGGTAACAAGCGACACTATGGATCTGATCTG 380

Query 610 GGGCCAGGTACCTCTATCTTGGTGACCTGGTTAAAAAGCGTCTAGTGGGCCAAACCCggg 669
          ||||| ||||| ||||| ||||| ||||| ||||| ||||| ||||| |||||
Sbjct 379 GGGCCAGGTACCTCTATCTTGGTGATCTGGTTAAAAAACGTCTAGTGGGCCAAACCCGGG 320

Query 670 ggggATCCCCGGTTTCCTTTTATTTTATCAATGCTACAATGGAGACAATTAAGATATTG 729
          ||||| ||||| ||||| ||||| ||||| ||||| ||||| ||||| |||||
Sbjct 319 GGGGATCCCCGGTTTCCTTTTATTTTATCAATGCCACTATGGAGACAATTAAGAGTATTG 260

Query 730 CAGATATGG 738
          |||||
Sbjct 259 CAGATATGG 251
```

>SRR2298573.48192 48192 length=500  
Length=500

Score = 429 bits (232), Expect = 7e-116  
Identities = 244/250 (98%), Gaps = 0/250 (0%)  
Strand=Plus/Minus

```
Query 436 GGGGCCAAAAGCCAAGGTCTAACAAACCCTTTAGGATTGGTTCTAAACCTGAGATGTTGT 495
          ||||| ||||| ||||| ||||| ||||| ||||| ||||| ||||| |||||
Sbjct 250 GGGGCCAAAAGCCAAGGTCTAACAAACCCTTTAGGATTGGTTCTAAACCTGAGATGTTGT 191

Query 496 GGAAGATACTTAGTACCTGCCGATCTGGTAGTACTGCAAACACTAGTTGTAAGGCCACG 555
          ||||| ||||| ||||| ||||| ||||| ||||| ||||| ||||| |||||
Sbjct 190 GGAAGATACTTAGTACCTACCGATCTGGTAGTAGTGCAAACACTAGTTGTAAGGCCACG 131

Query 556 AAGGATGCCCAGAAGGTACCCATAGGTAACAAGTGACACTATGGATCTGATCTGGGGCCA 615
          ||||| ||||| ||||| ||||| ||||| ||||| ||||| ||||| |||||
Sbjct 130 AAGGATGCCCAGAAGGTACCCATAGGTAACAAGCGACACTATGGATCTGATCTGGGGCCA 71

Query 616 GGTACCTCTATCTTGGTGACCTGGTTAAAAAGCGTCTAGTGGGCCAAACCCgggggggAT 675
          ||||| ||||| ||||| ||||| ||||| ||||| ||||| ||||| |||||
Sbjct 70 GGTACCTCTATCTTGGTGATCTGGTTAAAAAACGTCTAGTGGGCCAAACCCGGGGGGGAT 11

Query 676 CCCCGTTTC 685
          |||||
Sbjct 10 CCCCGTTTC 1
```

Score = 412 bits (223), Expect = 7e-111  
Identities = 241/250 (96%), Gaps = 0/250 (0%)  
Strand=Plus/Plus



```

Query 396 CCTATTGCCAGCGGAACAACACCTGGTAACAGGTGCCTCTGGGGCCAAAAGCCAAGGTCT 455
          |||
Sbjct 251 CCTATTGCCAGCGGAACAACACCTGGTAACAGGTGCCTCTGGGGCCAAAAGCCAAGGTTT 310

Query 456 AACAAACCCCTTTAGGATTGGTTCTAAACCTGAGATGTTGTGGAAGATACTTAGTACCTGC 515
          |||
Sbjct 311 AACAAACCCCTTTAGGATTGGTTCTAAACCTGAGATGTTGTGGAAGATACTTAGTACCTAC 370

Query 516 CGATCTGGTAGTACTGCAAACACTAGTTGTAAGGCCACGAAGGATGCCAGAAAGGTACC 575
          |||
Sbjct 371 CGATCTGGTAGTAGGGCAAACACTAGTTGTAAGGCCACGAAGGATGCCAGAAAGGTACC 430

Query 576 CATAGGTAACAAGTGACACTATGGATCTGATCTGGGGCCAGGTACCTCTATCTTGGTGAC 635
          |||
Sbjct 431 CATAGGTAACAAGCGACACTATGGAAGTATGATCTGGGGCCAGGTACCTCTATCTTGGGGCT 490

Query 636 CTGGTTAAAA 645
          |||
Sbjct 491 CTGGTTAAAA 500

```

>SRR2298573.42949 42949 length=500  
Length=500

Score = 429 bits (232), Expect = 7e-116  
Identities = 259/272 (95%), Gaps = 1/272 (0%)  
Strand=Plus/Minus

```

Query 415 CACCTGGTAACAGGTGCCTCT-GGGGCCAAAAGCCAAGGTCTAACAAACCCCTTTAGGATT 473
          |||
Sbjct 272 CACCTGTTACCAGGTGTTGTTGCGGGGCCAAAAGCCAAGGTTTAAACAAACCCCTTTAGGATT 213

Query 474 GGTCTAAACCTGAGATGTTGTGGAAGATACTTAGTACCTGCCGATCTGGTAGTACTGCA 533
          |||
Sbjct 212 GGTCTAAACCTGAGATGTTGTGGAAGATACTTAGTACCTACCGATCTGGTAGTAGTGCA 153

Query 534 AACACTAGTTGTAAGGCCACGAAGGATGCCAGAAAGGTACCCATAGGTAACAAGTGACA 593
          |||
Sbjct 152 AACACTAGTTGTAAGGCCACGAAGGATGCCAGAAAGGTACCCATAGGTAACAAGCGACA 93

Query 594 CTATGGATCTGATCTGGGGCCAGGTACCTCTATCTTGGTGACCTGGTTAAAAAGCGTCTA 653
          |||
Sbjct 92 CTATGGATCTGATCTGGGGCCAGGTACCTCTATCTTGGTGATCTGGTTAAAAAACGTCTA 33

Query 654 GTGGGCCAAAACCCgggggggATCCCCGGTTTC 685
          |||
Sbjct 32 GTGGGCCAAAACCCGGGGGGGATCCCCGGTTTC 1

```

Score = 401 bits (217), Expect = 2e-107  
Identities = 239/250 (96%), Gaps = 0/250 (0%)  
Strand=Plus/Plus

```

Query 409 GAACAACACCTGGTAACAGGTGCCTCTGGGGCCAAAAGCCAAGGTCTAACAAACCCTTTA 468
          |||
Sbjct 251 GAACAACACCTGGTAACAGGTGCCTCTGGGGCCAAAAGCCAAGGTTTAAACAAACCCTTTA 310

Query 469 GGATTGGTTCTAAACCTGAGATGTTGTGGAAGATACTTAGTACCTGCCGATCTGGTAGTA 528

```

```

Sbjct 311 |||
GGATTGGTTCTAAACCTGAGATGTTGTGGAAGATACTTAGTACCTACCGATCTGGTAGTA 370
Query 529 CTGCAAACACTAGTTGTAAGGCCACGAAGGATGCCCAGAAGGTACCCATAGGTAACAAG 588
|||
Sbjct 371 GTGCAAACACTAGTTGTAAGGCCACGAAGGATGCCCAGAAGGTACCCATAGGTAACAAG 430
Query 589 TGACACTATGGATCTGATCTGGGGCCAGGTACCTCTATCTTGGTGACCTGGTTAAAAAGC 648
|||
Sbjct 431 CGACACCATGGATCTGATCTGGGGCCAGGAACCTCTAACTTGGGGATCTGGTTAAAAAAC 490
Query 649 GTCTAGTGGG 658
| |||
Sbjct 491 GGCTAGTGGG 500

```

>SRR2298573.25832 25832 length=500  
Length=500

Score = 429 bits (232), Expect = 7e-116  
Identities = 244/250 (98%), Gaps = 0/250 (0%)  
Strand=Plus/Plus

```

Query 464 CTTTAGGATTGGTTCTAAACCTGAGATGTTGTGGAAGATACTTAGTACCTGCCGATCTGG 523
|||
Sbjct 1 CTTTAGGATTGGTTCTAAACCTGAGATGTTGTGGAAGATACTTAGTACCTACCGATCTGG 60
Query 524 TAGTACTGCAAACACTAGTTGTAAGGCCACGAAGGATGCCCAGAAGGTACCCATAGGTA 583
|||
Sbjct 61 TAGTAGTGCAAACACTAGTTGTAAGGCCACGAAGGATGCCCAGAAGGTACCCATAGGTA 120
Query 584 ACAAGTGACACTATGGATCTGATCTGGGGCCAGGTACCTCTATCTTGGTGACCTGGTTAA 643
|||
Sbjct 121 ACAAGCGACACTATGGATCTGATCTGGGGCCAGGTACCTCTATCTTGGTGATCTGGTTAA 180
Query 644 AAAGCGTCTAGTGGGCCAAACCCggggggggATCCCCGGTTTCCTTTTATTTTATCAATGC 703
|||
Sbjct 181 AAAACGTCTAGTGGGCCAAACCCGGGGGGGATCCCCGGTTTCCTTTTATTTTATCAATGC 240
Query 704 TACAATGGAG 713
| |||
Sbjct 241 CACAATGGAG 250

```

Score = 374 bits (202), Expect = 3e-99  
Identities = 234/250 (94%), Gaps = 0/250 (0%)  
Strand=Plus/Minus

```

Query 475 GTTCTAAACCTGAGATGTTGTGGAAGATACTTAGTACCTGCCGATCTGGTAGTACTGCAA 534
|||
Sbjct 500 GTTCAAACCTGAGATTTTGGGGAAGGTACTTAGTACCTGCCTATTTGGTTGTAGTGCAA 441
Query 535 ACCTAGTTGTAAGGCCACGAAGGATGCCCAGAAGGTACCCATAGGTAACAAGTGACAC 594
|||
Sbjct 440 ACCCTAGTTGTAAGGCCAAGAAGGATGCCCAGAAGGTACCCATAGGTAACAAGCGACAC 381
Query 595 TATGGATCTGATCTGGGGCCAGGTACCTCTATCTTGGTGACCTGGTTAAAAAGCGTCTAG 654
|||
Sbjct 380 TATGGATCTGATCTGGGGCCAGGTACCTCTATCTTGGTGATCTGGTTAAAAAACGCTAG 321

```

```

Query 655 TGGGCCAAAACCCgggggggATCCCCGGTTTCCTTTTATTTTATCAATGCTACAATGGAGA 714
          |||
Sbjct 320 TGGGCCAAAACCCGGGGGGGATCCCCGGTTTCCTTTTATTTTATCAATGCCACTATGGAGA 261

Query 715 CAATTAAAAG 724
          |||
Sbjct 260 CAATTAAGAG 251

```

>SRR2298573.22802 22802 length=500  
Length=500

Score = 429 bits (232), Expect = 7e-116  
Identities = 248/256 (97%), Gaps = 0/256 (0%)  
Strand=Plus/Plus

```

Query 313 CACACAGCCATCCTCTAGTAAGTTTGTGAGACGTCTGGTGACGTGTGGGAACTTATTGGA 372
          |||
Sbjct 1 CACACAGCCATCCTCTAGTAAGTTTGTGAGACGTCTGGTGACGTGTGGGAACTTATTGGA 60

Query 373 AGCAACATTTTGTCTGCAAAGCATCCTATTGCCAGCGGAACAACACCTGGTAACAGGTGCC 432
          |
Sbjct 61 AACCAACATTTTGTCTGTAAAGCATCCTATTGCCAGCGGAACAACACCTGGTAACAGGTGCC 120

Query 433 TCTGGGGCCAAAAGCCAAGGTCTAACAAACCCTTTAGGATTGGTTCTAAACCTGAGATGT 492
          |||
Sbjct 121 TCTGGGGCCAAAAGCCAAGGTCTAACAAACCCTTTAGGATTGGTTCTAAACCTGAGATGT 180

Query 493 TGTGGAAGATACTTAGTACCTGCCGATCTGGTAGTACTGCAAACACTAGTTGTAAGGCC 552
          |||
Sbjct 181 TGTGGAAGATACTTAGTACCTACCGATCTGGTAGTACTGCAAACACAAGTTGAAAGGCC 240

Query 553 ACGAAGGATGCCCAGA 568
          |||
Sbjct 241 ACGAAGGATGCCAAGA 256

```

Score = 418 bits (226), Expect = 2e-112  
Identities = 242/250 (97%), Gaps = 0/250 (0%)  
Strand=Plus/Minus

```

Query 382 TTGCTGCAAAGCATCCTATTGCCAGCGGAACAACACCTGGTAACAGGTGCCCTCTGGGGCC 441
          |||
Sbjct 500 TTGCTGTAAAGCCTCCTATTGCCAGCGGACCAACCCCTGGTAACAGGTGCCCTCTGGGGCC 441

Query 442 AAAAGCCAAGGTCTAACAAACCCTTTAGGATTGGTTCTAAACCTGAGATGTTGTGGAAGA 501
          |||
Sbjct 440 AAAAGCCAAGGTCTAACAAACCCTTTAGGATTGGTTCTAAACCTGAGATGTTGTGGAAGA 381

Query 502 TACTTAGTACCTGCCGATCTGGTAGTACTGCAAACACTAGTTGTAAGGCCACGAAGGAT 561
          |||
Sbjct 380 TACTTAGTACCTACCGATCTGGTAGTACTGCAAACACTAGTTGTAAGGCCACGAAGGAT 321

Query 562 GCCCAGAAGGTACCCATAGGTAACAAGTGACACTATGGATCTGATCTGGGGCCAGGTACC 621
          |||
Sbjct 320 GCCCAGAAGGTACCCATAGGTAACAAGCGACACTATGGATCTGATCTGGGGCCAGGTACC 261

Query 622 TCTATCTTG 631

```

Sbjct 260 ||||| TCTATCTTGG 251

>SRR2298573.22004 22004 length=500  
Length=500

Score = 429 bits (232), Expect = 7e-116  
Identities = 244/250 (98%), Gaps = 0/250 (0%)  
Strand=Plus/Plus

Query 394 ATCCTATTGCCAGCGGAACAACACCTGGTAACAGGTGCCTCTGGGGCCAAAAGCCAAGGT 453  
|||||  
Sbjct 1 ATCCTATTGCCAGCGGAACAACACCTGGTAACAGGTGCCTCTGGGGCCAAAAGCCAAGGT 60

Query 454 CTAACAAACCCTTTAGGATTGGTTCTAAACCTGAGATGTTGTGGAAGATACTTAGTACCT 513  
|||||  
Sbjct 61 TTAACAAACCCTTTAGGATTGGTTCTAAACCTGAGATGTTGTGGAAGGTACTTAGTACCT 120

Query 514 GCCGATCTGGTAGTACTGCAAACACTAGTTGTAAGGCCACGAAGGATGCCCAGAAGGTA 573  
|||||  
Sbjct 121 ACCGATCTGGTAGTACTGCAAACACTAGTTGTAAGGCCACGAAGGATGCCCAGAAGGTA 180

Query 574 CCCATAGGTAACAAGTGACACTATGGATCTGATCTGGGGCCAGGTACCTCTATCTTGGTG 633  
|||||  
Sbjct 181 CCCATAGGTAACAAGCGACACTATGGATCTGATCTGGGGCCAGGTACCTCTATCTTGGTG 240

Query 634 ACCTGGTTAA 643  
| |||||  
Sbjct 241 ATCTGGTTAA 250

Score = 388 bits (210), Expect = 1e-103  
Identities = 236/249 (95%), Gaps = 0/249 (0%)  
Strand=Plus/Minus

Query 455 TAACAAACCCTTTAGGATTGGTTCTAAACCTGAGATGTTGTGGAAGATACTTAGTACCTG 514  
|||||  
Sbjct 500 TAACAACCCTTTAGGATTGGTTCTAAACCTGGGATTTTGTGGAAGGTCTTAGTTCCTA 441

Query 515 CCGATCTGGTAGTACTGCAAACACTAGTTGTAAGGCCACGAAGGATGCCCAGAAGGTAC 574  
|||||  
Sbjct 440 CCGATCTGGTAGTACTGCAAACACTAGTTTAAAGGCCACGAAGGATGCCCAGAAGGTAC 381

Query 575 CCATAGGTAACAAGTGACACTATGGATCTGATCTGGGGCCAGGTACCTCTATCTTGGTGA 634  
|||||  
Sbjct 380 CCATAGGTAACAAGCGACACTATGGATCTGATCTGGGGCCAGGTACCTCTATCTTGGTGA 321

Query 635 CCTGGTTAAAAAGCGTCTAGTGGGCCAAACCCgggggggATCCCCGTTTCCTTTTATTT 694  
|||||  
Sbjct 320 TCTGGTTAAAAACGTCTAGTGGGCCAAACCCGGGGGGGTCCCCGTTTCCTTTTATTT 261

Query 695 TATCAATGC 703  
|||||  
Sbjct 260 TATCAATGC 252

>SRR2298573.21098 21098 length=500  
Length=500

Score = 429 bits (232), Expect = 7e-116  
Identities = 244/250 (98%), Gaps = 0/250 (0%)  
Strand=Plus/Minus

```
Query 309 TGCTCACACAGCCATCCTCTAGTAAGTTTGTGAGACGTCTGGTGACGTGTGGGAACTTAT 368
|||||
Sbjct 250 TGCTCACACAGCCATCCTCTAGTAAGTTTGTGAGACGTTTGGTGACGTGTGGGAACTTAT 191

Query 369 TGGAAACAACATTTTGTGCAAAAGCATCCTATTGCCAGCGGAACAACACCTGGTAACAGG 428
|||||
Sbjct 190 TGGAAACAACATTTTGTGCTGTAAGCATCCTATTGCCAGCGGAACAACACCTGGTAACAGG 131

Query 429 TGCCTCTGGGGCCAAAAGCCAAGGTCTAACAAACCCTTTAGGATTGGTTCTAAACCTGAG 488
|||||
Sbjct 130 TGCCTCTGGGGCCAAAAGCCAAGGTTTAAACAAACCCTTTAGGATTGGTTCTAAACCTGAG 71

Query 489 ATGTTGTGGAAGATACTTAGTACCTGCCGATCTGGTAGTACTGCAAACACTAGTTGTAAG 548
|||||
Sbjct 70 ATGTTGTGGAAGATACTTAGTACCTACCGATCTGGTAGTAGTGCAAACACTAGTTGTAAG 11

Query 549 GCCCACGAAG 558
|||||
Sbjct 10 GCCCACGAAG 1
```

Score = 407 bits (220), Expect = 3e-109  
Identities = 240/250 (96%), Gaps = 0/250 (0%)  
Strand=Plus/Plus

```
Query 258 CAGATGGCGTGCCATAATTCTACTAGTGAGATAACCACGCTTGTGGACCTTATGCTCACAC 317
||
Sbjct 251 CAAATGGCGTGCCATAGCTCTATTAGTGAGATACCATGCTTGTGGACCTTATGCTCACAC 310

Query 318 AGCCATCCTCTAGTAAGTTTGTGAGACGTCTGGTGACGTGTGGGAACTTATTGGAAGCAA 377
|||||
Sbjct 311 AGCCATCCTCTAGTAAGTTTGTGAGACGTCTGGTGACGTGTGGGAACTTATTGGAAGCAA 370

Query 378 CATTTTGTGCTGCAAAGCATCCTATTGCCAGCGGAACAACACCTGGTAACAGGTGCCTCTGG 437
|||||
Sbjct 371 CATTTTGTGCTGTAAGCATCCTATTGCCAGCGGAACAACACCTGGTAACAGGTGCCTCTGG 430

Query 438 GGCCAAAAGCCAAGGTCTAACAAACCCTTTAGGATTGGTTCTAAACCTGAGATGTTGTGG 497
|||||
Sbjct 431 GGCCAAAAGCCAAGGTTTAAACAAACCCTTTAGGATTGGTTCTAAACCTGAGATGTTGTGG 490

Query 498 AAGATACTTA 507
|||||
Sbjct 491 AAGATACTTA 500
```

>SRR2298573.20649 20649 length=500  
Length=500

Score = 429 bits (232), Expect = 7e-116  
Identities = 244/250 (98%), Gaps = 0/250 (0%)  
Strand=Plus/Plus

```
Query 451 GGTCTAACAAACCCTTTAGGATTGGTTCTAAACCTGAGATGTTGTGGAAGATACTTAGTA 510
```



```

Query 472 TTGGTTCTAAACCTGAGATGTTGTGGAAGATACTTAGTACCTGCCGATCTGGTAGTACTG 531
          |||
Sbjct 130 TTGGTTCTAAACCTGAGATGTTGTGGAAGATACTTAGTACCTACCGATCTGGTAGTAGTG 71

Query 532 CAAACACTAGTTGTAAGGCCACGAAGGATGCCCAGAAGGTACCCATAGGTAACAAGTGA 591
          |||
Sbjct 70 CAAACACTAGTTGTAAGGCCACGAAGGATGCCCAGAAGGTACCCATAGGTAACAAGCGA 11

Query 592 CACTATGGAT 601
          |||
Sbjct 10 CACTATGGAT 1

```

Score = 420 bits (227), Expect = 4e-113  
Identities = 241/248 (97%), Gaps = 0/248 (0%)  
Strand=Plus/Plus

```

Query 330 GTAAGTTTGTGAGACGTCTGGTGACGTGTGGGAACTTATTGGAAGCAACATTTTGCTGCA 389
          |||
Sbjct 252 GTAAGTCGGTGAGACGTCTGGTGACGTGTGGGAACTTATTGGAACAACATTTTGCTGTA 311

Query 390 AAGCATCCTATTGCCAGCGGAACAACACCTGGTAACAGGTGCCTCTGGGGCCAAAAGCCA 449
          |||
Sbjct 312 AAGCATCCTATTGCCAGCGGAACAACACCTGGTAACAGGTGCCTCTGGGGCCAAAAGCCA 371

Query 450 AGGTCTAACAAACCCCTTTAGGATTGGTTCTAAACCTGAGATGTTGTGGAAGATACTTAGT 509
          |||
Sbjct 372 AGGTTTAAACAAACCCCTTTAGGATTGGTTCTAAACCTGAGATGTTGTGGAAGATACTTAGT 431

Query 510 ACCTGCCGATCTGGTAGTACTGCAAACACTAGTTGTAAGGCCACGAAGGATGCCCAGAA 569
          |||
Sbjct 432 ACCTACCGATCTGGTAGTAGTGCAAACACTAGTTGTAAGGCCACGAAGGATGCCCAGAA 491

Query 570 GGTACCCA 577
          |||
Sbjct 492 GGTACCCA 499

```

>SRR2298573.12663 12663 length=500  
Length=500

Score = 429 bits (232), Expect = 7e-116  
Identities = 244/250 (98%), Gaps = 0/250 (0%)  
Strand=Plus/Plus

```

Query 409 GAACAACACCTGGTAACAGGTGCCTCTGGGGCCAAAAGCCAAGGTCTAACAAACCCCTTTA 468
          |||
Sbjct 1 GAACAACACCTGGTAACAGGTGCCTCTGGGGCCAAAAGCCAAGGTTTAAACAAACCCCTTTA 60

Query 469 GGATTGGTTCTAAACCTGAGATGTTGTGGAAGATACTTAGTACCTGCCGATCTGGTAGTA 528
          |||
Sbjct 61 GGATTGGTTCTAAACCTGAGATGTTGTGGAAGATACTTAGTACCTACCGATCTGGTAGTA 120

Query 529 CTGCAAACACTAGTTGTAAGGCCACGAAGGATGCCCAGAAGGTACCCATAGGTAACAAG 588
          |||
Sbjct 121 GTGCAAACACTAGTTGTAAGGCCACGAAGGATGCCCAGAAGGTACCCATAGGTAACAAG 180

Query 589 TGACACTATGGATCTGATCTGGGGCCAGGTACCTCTATCTTGGTGACCTGGTTAAAAAGC 648

```

```

|||||
Sbjct 181 CGACACTATGGATCTGATCTGGGGCCAGGTACCTCTATCTTGGTGATCTGGTTAAAAAAC 240
Query 649 GTCTAGTGGG 658
|||||
Sbjct 241 GTCTAGTGGG 250

```

Score = 355 bits (192), Expect = 1e-93  
Identities = 230/249 (92%), Gaps = 0/249 (0%)  
Strand=Plus/Minus

```

Query 455 TAACAAACCCTTTAGGATTGGTTCTAAACCTGAGATGTTGTGGAAGATACTTAGTACCTG 514
|||||
Sbjct 500 TAACAACCCTTTAGGATTGGTTCTAACCTGTGATGTTGTGGAATACTTAGTACCTA 441

Query 515 CCGATCTGGTAGTACTGCAAACACTAGTTGTAAGGCCACGAAGGATGCCAGAAAGGTAC 574
|||||
Sbjct 440 CCGATCTGGTAGTACTGCAAACACTGCGTGTAAAGGCCACGAAGGATGCCAGAAAGGTGC 381

Query 575 CCATAGGTAACAAGTGACACTATGGATCTGATCTGGGGCCAGGTACCTCTATCTTGGTGA 634
|||||
Sbjct 380 CCATAGGTAACACTAGCGACACGATGGATCTGATCTGGGGCCAGGTACCTCTAGCTTGGTGA 321

Query 635 CCTGGTTAAAAAGCGTCTAGTGGGCCAAACCCgggggggATCCCCGTTTCCTTTTATTT 694
|||||
Sbjct 320 TCTGGTTAAAAACGCTCTAGTGGGCCAAACCCGGGGGGGATCCCCGTTTCCTTTTATTT 261

Query 695 TATCAATGC 703
|||||
Sbjct 260 TATCAATGC 252

```

>SRR2298573.7958 7958 length=500  
Length=500

Score = 429 bits (232), Expect = 7e-116  
Identities = 244/250 (98%), Gaps = 0/250 (0%)  
Strand=Plus/Plus

```

Query 297 TTGTGGACCTTATGCTCACACAGCCATCCTCTAGTAAGTTTGTGAGACGTCTGGTGACGT 356
|||||
Sbjct 251 TTGTGGACCTTATGCTCACACAGCCATCCTCTAGTAAGTTTGTGAGACGTCTGGTGACGT 310

Query 357 GTGGGAACTTATTGGAAGCAACATTTTGTCTGCAAAGCATCCTATTGCCAGCGGAACAACA 416
|||||
Sbjct 311 GTGGGAACTTATTGGAACAACATTTTGTCTGTAAGCATCCTATTGCCAGCGGAACAACA 370

Query 417 CCTGGTAACAGGTGCCTCTGGGGCCAAAAGCCAAGGTCTAACAAACCCTTTAGGATTGGT 476
|||||
Sbjct 371 CCTGGTAACAGGTGCCTCTGGGGCCAAAAGCCAAGGTTAACAAACCCTTTAGGATTGGT 430

Query 477 TCTAAACCTGAGATGTTGTGGAAGATACTTAGTACCTGCCGATCTGGTAGTACTGCAAAC 536
|||||
Sbjct 431 TCTAAACCTGAGATGTTGTGGAAGATACTTAGAACCTACCGATCTGGTAGTACTGCAAAC 490

Query 537 ACTAGTTGTA 546
|||||
Sbjct 491 ACTAGTTGTA 500

```



Score = 411 bits (222), Expect = 3e-110  
Identities = 240/249 (96%), Gaps = 0/249 (0%)  
Strand=Plus/Minus

```
Query 455 TAACAAACCCCTTTAGGATTGGTTCTAAACCTGAGATGTTGTGGAAGATACTTAGTACCTG 514
          |||
Sbjct 250 TAACAAACCCCTTTAGGATTGGTTTTAAACCTGAGATGTTGGGGAAGATTCTTAGTACCTA 191

Query 515 CCGATCTGGTAGTACTGCAAAACTAGTTGTAAGGCCACGAAGGATGCCCGAAGGTAC 574
          |||
Sbjct 190 CCGATCTGGTAGTACTGCAAAACTAGTTGTAAGGCCACGAAGGATGCCCGAAGGTAC 131

Query 575 CCATAGGTAACAAGTGACACTATGGATCTGATCTGGGGCCAGGTACCTCTATCTTGGTGA 634
          |||
Sbjct 130 CCATAGGTAACAAGCGACACTATGGATCTGATCTGGGGCCAGGTACCTCTATCTTGGTGA 71

Query 635 CCTGGTTAAAAAGCGTCTAGTGGGCCAAAACCCgggggggATCCCCGGTTTCCTTTTATTT 694
          |||
Sbjct 70 TCTGGTTAAAAACGTCTAGTGGGCCAAAACCCGGGGGGGATCCCCGGTTTCCTTTTATTT 11

Query 695 TATCAATGC 703
          |||
Sbjct 10 TATCAATGC 2
```

>SRR2298566.575132 575132 length=500  
Length=500

Score = 429 bits (232), Expect = 7e-116  
Identities = 244/250 (98%), Gaps = 0/250 (0%)  
Strand=Plus/Plus

```
Query 1281 GTTGTGACATATGACTCAAAGTTAGAATTTGGAGCATTACCAATTTACCACATGTATTG 1340
          |||
Sbjct 251 GTTGTGACATATGACTCAAAGTTAGAATTTGGAGCATTACCAATCTACCACATGTGTTG 310

Query 1341 ATGAATTTGGCTGAGACCACACAGGCTGATTTATGTATCCCCTATGTTGCTGACACAAAC 1400
          |||
Sbjct 311 ATGAATTTGGCTGAGACCACACAGGCTGATTTATGTATCCCCTATGTTGCTGACACAAAC 370

Query 1401 TATGTTAAAACGGATTTCGTCAGACTTAGGGCAACTAAAAGTCTATGTTTGGACACCTTTA 1460
          |||
Sbjct 371 TATGTTAAAACAGATTTCGTCAGACTTAGGGCAACTAAAAGTCTATGTTTGGACACCTTTA 430

Query 1461 TCTATACCTTCAGGTTCTGCGACACAAGTTGATGTAACCATATTGGGTAGTTTATTGCAA 1520
          |||
Sbjct 431 TCCATACCTTCAGGTTCTGCTACACAAGTTGATGTAACCATATTGGGTAGCTTATTGCAA 490

Query 1521 TTGACTTCC 1530
          |||
Sbjct 491 TTGACTTCC 500
```

Score = 346 bits (187), Expect = 7e-91  
Identities = 228/248 (92%), Gaps = 1/248 (0%)  
Strand=Plus/Minus



Sbjct 311 CCTGTTGTGACATATGACTCAAAGTTAGAATTTGGAGCATTACCAATCTACCACATGTG 370

Query 1338 TTGATGAATTTGGCTGAGACCACACAGGCTGATTTATGTATCCCCTATGTTGCTGACACA 1397  
 |||

Sbjct 371 TTGATGAATTTGGCTGAGACCACACAGGCTGATTTATGTATCCCCTATGTTGCTGACACA 430

Query 1398 AACTATGTTAAAACGGATTCGTCAGACTTAGGGCAACTAAAAGTCTATGTTTGGACACCT 1457  
 |||

Sbjct 431 AACTATGTTAAAACAGATTCGTCAGACTTAGGGCAACTAAAAGCCTATGTTTGGACACCT 490

Query 1458 TTATCTATAC 1467  
 |||

Sbjct 491 TTATCCATAC 500

>SRR2298566.378213 378213 length=500  
 Length=500

Score = 429 bits (232), Expect = 7e-116  
 Identities = 244/250 (98%), Gaps = 0/250 (0%)  
 Strand=Plus/Plus

Query 1271 ACCCAAACCTGTTGTGACATATGACTCAAAGTTAGAATTTGGAGCATTACCAATTTACC 1330  
 |||

Sbjct 1 ACCCAAACCTGTTGTGACATATGACTCAAAGTTAGAATTTGGAGCATTACCAATCTACC 60

Query 1331 ACATGTATTGATGAATTTGGCTGAGACCACACAGGCTGATTTATGTATCCCCTATGTTGC 1390  
 |||

Sbjct 61 ACATGTGTTGATGAATTTGGCTGAGACCACACAGGCTGATTTATGTATCCCCTATGTTGC 120

Query 1391 TGACACAAACTATGTTAAAACGGATTCGTCAGACTTAGGGCAACTAAAAGTCTATGTTTG 1450  
 |||

Sbjct 121 TGACACAAACTATGTTAAAACAGATTCGTCAGACTTAGGGCAACTAAAAGTCTATGTTTG 180

Query 1451 GACACCTTTATCTATACCTTCAGGTTCTGCGACACAAGTTGATGTAACCATATTGGGTAG 1510  
 |||

Sbjct 181 GACACCTTTATCCATACCTTCAGGTTCTGCTACACAAGTTGATGTAACCATATTGGGTAG 240

Query 1511 TTTATTGCAA 1520  
 |||

Sbjct 241 CTTATTGCAA 250

Score = 357 bits (193), Expect = 3e-94  
 Identities = 233/253 (92%), Gaps = 0/253 (0%)  
 Strand=Plus/Minus

Query 1430 GCAACTAAAAGTCTATGTTTGGACACCTTTATCTATACCTTCAGGTTCTGCGACACAAGT 1489  
 |||

Sbjct 500 GCAACTAAATGTTTGGTTGGGACCCCTTTATCCATACCTTCAGTTTCTGCTACACAAGT 441

Query 1490 TGATGTAACCATATTGGGTAGTTTATTGCAATTGGACTTCCAAAATCCTAGGGTATTGG 1549  
 |||

Sbjct 440 TGATGTAACCATATTGGGTAGCTTATTGCAATTGGACTTCCAAAATCCTAGGGTATTTCGG 381

Query 1550 CCAAGACGTTGGTATCTATGATAATGCACCAACGCGGAAACAAAATCTTAAAAAGATTCT 1609  
 |||

Sbjct 380 TCAAGACGTTGGTATTTATGACAATGCACCAACGCGGAAACAAAACCTAAAAAGACTCT 321

```

Query 1610 TACAATGAGCACTAAAATACAAGTGGACTAGGGGAAAAAATTGACATTGCAGAAGGGCCAGG 1669
          |||
Sbjct 320 TACAATGAGCACTAAAATACAATTGGACTAGGGGAAAAAATTGACATTGCAGAAGGGCCAGG 261

Query 1670 TTCTATGAACATG 1682
          |||
Sbjct 260 TTCTATGAACTTG 248

```

>SRR2298546.989298 989298 length=500  
Length=500

Score = 429 bits (232), Expect = 7e-116  
Identities = 250/259 (97%), Gaps = 0/259 (0%)  
Strand=Plus/Plus

```

Query 1285 TGACATATGACTCAAAGTTAGAATTTGGAGCATTACCAATTTACCACATGTATTGATGA 1344
          |||
Sbjct 242 TGACGAATGACTCAAAGTTAGAATTTGGAGCGTTTACCAATTTACCACATGTGTTGATGA 301

Query 1345 ATTTGGCTGAGACCACACAGGCTGATTTATGTATCCCCTATGTTGCTGACACAAACTATG 1404
          |||
Sbjct 302 ATTTGGCTGAGACCACACAGGCTGATTTATGTATCCCCTATGTTGCTGACACAAACTATG 361

Query 1405 TTAAAACGGATTCGTCAGACTTAGGGCAACTAAAAGTCTATGTTTGGACACCTTTATCTA 1464
          |||
Sbjct 362 TTAAAACAGATTCGTCAGACTTAGGGCAACTAAAAGTCTATGTTTGGACACCTTTATCCA 421

Query 1465 TACCTTCAGGTTCTGCGACACAAGTTGATGTAACCATATTGGGTAGTTTATTGCAATTGG 1524
          |||
Sbjct 422 TACCTTCAGGTTCTGCTACACAAGTTGATGTTACCATATTGGGTAGCTTATTGCAATTGG 481

Query 1525 ACTTCCAAAATCCTAGGGT 1543
          |||
Sbjct 482 ACTTCCAAAATCCTAGGGT 500

```

Score = 394 bits (213), Expect = 3e-105  
Identities = 237/249 (95%), Gaps = 0/249 (0%)  
Strand=Plus/Minus

```

Query 1414 ATTCGTCAGACTTAGGGCAACTAAAAGTCTATGTTTGGACACCTTTATCTATACCTTCAG 1473
          |||
Sbjct 249 ATTCGTCAGACTTAGGGCAACTAAAAGTCTATGTTTGGACACCTTTATCCATACCTTCAG 190

Query 1474 GTTCTGCGACACAAGTTGATGTAACCATATTGGGTAGTTTATTGCAATTGGACTTCCAAA 1533
          |||
Sbjct 189 GTTCTGCTACACAAGTTGATGTTACCATATTGGGTAGCTTATTGCAATTGGACTTCCAAA 130

Query 1534 ATCTTAGGGTGTGGCCAGACGTTGGTATCTATGATAATGCACCAACGCGGAAACAAA 1593
          |||
Sbjct 129 ATCTTAGGGTATTTCGGTCAAGACGTTGGTATTTATGACAATGCACCAACGCGGAAAGCAA 70

Query 1594 ATCTTAAAAAGATTCTTACAATGAGCACTAAAATACAAGTGGACTAGGGGAAAAAATTGACA 1653
          |||
Sbjct 69 ATCTTAAGAAAAATTCTTACAATGAGCACTAAAATACAAGTGGACTAGGGGAAAAAATTGACA 10

Query 1654 TTGCAGAAG 1662
          |||

```

Sbjct 9 TTGCAGAAAG 1

>SRR2298546.892755 892755 length=500  
Length=500

Score = 429 bits (232), Expect = 7e-116  
Identities = 244/250 (98%), Gaps = 0/250 (0%)  
Strand=Plus/Plus

```
Query 1228 ATGTTAACCAAGGAACAGCTGGTAGTGCATTGGTGGTGTATGAACCCAAACCTGTTGTGA 1287
          |||
Sbjct 1 ATGTTAATCAAGGAACAGCCGGTAGTGCATTGGTGGTGTATGAACCCAAACCTGTTGTGA 60

Query 1288 CATATGACTCAAAGTTAGAATTTGGAGCATTTACCAATTTACCACATGTATTGATGAATT 1347
          |||
Sbjct 61 CATATGACTCAAAGTTAGAATTTGGAGCGTTTACCAATTTACCACATGTGTTGATGAATT 120

Query 1348 TGGCTGAGACCACACAGGCTGATTTATGTATCCCCTATGTTGCTGACACAAACTATGTTA 1407
          |||
Sbjct 121 TGGCTGAGACCACACAGGCTGATTTATGTATCCCCTATGTTGCTGACACAAACTATGTTA 180

Query 1408 AAACGGATTCGTCAGACTTAGGGCAACTAAAAGTCTATGTTTGGACACCTTTATCTATAC 1467
          |||
Sbjct 181 AAACAGATTCGTCAGACTTAGGGCAACTAAAAGTCTATGTTTGGACACCTTTATCCATAC 240

Query 1468 CTTCAGGTTC 1477
          |||
Sbjct 241 CTTCAGGTTC 250
```

Score = 425 bits (230), Expect = 9e-115  
Identities = 244/251 (97%), Gaps = 0/251 (0%)  
Strand=Plus/Minus

```
Query 1292 TGACTCAAAGTTAGAATTTGGAGCATTTACCAATTTACCACATGTATTGATGAATTTGGC 1351
          |||
Sbjct 500 TGACTCAAAGTTAGAATTTGGAGCGTTTACCAATTTACCACATGTGTTGATGAATTTGGC 441

Query 1352 TGAGACCACACAGGCTGATTTATGTATCCCCTATGTTGCTGACACAAACTATGTTAAAAC 1411
          |||
Sbjct 440 TGAGACCACACAGGCTGATTTATGTATCCCCTATGTTGCTGACACAAACTATGTTAAAAC 381

Query 1412 GGATTCGTCAGACTTAGGGCAACTAAAAGTCTATGTTTGGACACCTTTATCTATACCTTC 1471
          |||
Sbjct 380 AGATTCGTCAGACTTAGGGCAACTAAAAGTCTATGTTTGGACACCTTTATCCATACCTTC 321

Query 1472 AGGTTCTGCGACACAAGTTGATGTTAACCATATTGGGTAGTTTATTGCAATTGGACTTCCA 1531
          |||
Sbjct 320 AGGTTCTGCTACACAAGTTGATGTTAACCATATTGGGTAGCTTATTGCAATTGGACTTCCA 261

Query 1532 AAATCCTAGGG 1542
          |||
Sbjct 260 AAATCCTAGGG 250
```

>SRR2298546.846783 846783 length=501  
Length=501

Score = 429 bits (232), Expect = 7e-116  
Identities = 242/247 (98%), Gaps = 0/247 (0%)  
Strand=Plus/Plus

```
Query 1249 GTAGTGCATTGGTGGTGTATGAACCCAAACCTGTTGTGACATATGACTCAAAGTTAGAAT 1308
          |||
Sbjct 1     GTAGTGCATTGGTGGTGTATGAACCCAAACCTGTTGTGACATATGACTCAAAGTTAGAAT 60

Query 1309 TTGGAGCATTACCAATTTACCACATGTATTGATGAATTTGGCTGAGACCACACAGGCTG 1368
          |||
Sbjct 61    TTGGAGCGTTTACCAATTTACCACATGTGTTGATGAATTTGGCTGAGACCACACAGGCTG 120

Query 1369 ATTTATGTATCCCTATGTTGCTGACACAAACTATGTTAAAACGGATTCGTCAGACTTAG 1428
          |||
Sbjct 121   ATTTATGTATCCCTATGTTGCTGACACAAACTATGTTAAAACAGATTCGTCAGACTTAG 180

Query 1429 GGCAACTAAAAGTCTATGTTTGGACACCTTTATCTATACCTTCAGGTTCTGCGACACAAG 1488
          |||
Sbjct 181   GGCAACTAAAAGTCTATGTTTGGACACCTTTATCCATACCTTCAGGTTCTGCTACACAAG 240

Query 1489 TTGATGT 1495
          |||
Sbjct 241   TTGATGT 247
```

Score = 392 bits (212), Expect = 9e-105  
Identities = 238/251 (95%), Gaps = 0/251 (0%)  
Strand=Plus/Minus

```
Query 1379 CCCCTATGTTGCTGACACAAACTATGTTAAAACGGATTCGTCAGACTTAGGGCAACTAAA 1438
          |||
Sbjct 501   CCCCTATGTTGCTGACACAAACTATGTTAAAACAGATTCGTCAGACTTAGGGCAACTAAA 442

Query 1439 AGTCTATGTTTGGACACCTTTATCTATACCTTCAGGTTCTGCGACACAAGTTGATGTAAC 1498
          |||
Sbjct 441   AGTCTATGTTTGGACACCTTTATCCATACCTTCAGGTTCTGCTACACAAGTTGATGTTAC 382

Query 1499 CATATTGGGTAGTTTATTGCAATTGGACTTCCAAAATCCTAGGGTGTGGCCAAAGACGT 1558
          |||
Sbjct 381   CATATTGGGTAGCTTATTGCAATTGGACTTCCAAAATCCTAGGGTATTCGGTCAAGACGT 322

Query 1559 TGGTATCTATGATAATGCACCAACGCGAAACAAAATCTTAAAAAGATTCTTACAATGAG 1618
          |||
Sbjct 321   TGGTATTTATGACAATGCACCAACGCGAAGCAAAAATCTTAAAGAAAATCTTACAATGAG 262

Query 1619 CACTAAATACA 1629
          |||
Sbjct 261   CACTAAATACA 251
```

>SRR2298546.823945 823945 length=502  
Length=502

Score = 429 bits (232), Expect = 7e-116  
Identities = 244/250 (98%), Gaps = 0/250 (0%)  
Strand=Plus/Minus

```
Query 1236 CAAGGAACAGCTGGTAGTGCATTGGTGGTGTATGAACCCAAACCTGTTGTGACATATGAC 1295
          |||
```

```

Sbjct 250 CAAGGAACAGCCGGTAGTGCATTGGTGGTGTATGAACCCAAACCTGTTGTGACATATGAC 191
Query 1296 TCAAAGTTAGAATTTGGAGCATTTACCAATTTACCACATGTATTGATGAATTTGGCTGAG 1355
|||||
Sbjct 190 TCAAAGTTAGAATTTGGAGCGTTTACCAATTTACCACATGTGTTGATGAATTTGGCTGAG 131
Query 1356 ACCACACAGGCTGATTTATGTATCCCCTATGTTGCTGACACAAACTATGTTAAAACGGAT 1415
|||||
Sbjct 130 ACCACACAGGCTGATTTATGTATCCCCTATGTTGCTGACACAAACTATGTTAAAACAGAT 71
Query 1416 TCGTCAGACTTAGGGCAACTAAAAGTCTATGTTTGGACACCTTTATCTATAACCTTCAGGT 1475
|||||
Sbjct 70 TCGTCAGACTTAGGGCAACTAAAAGTCTATGTTTGGACACCTTTATCCATAACCTTCAGGT 11
Query 1476 TCTGCGACAC 1485
|||||
Sbjct 10 TCTGCTACAC 1

```

Score = 398 bits (215), Expect = 2e-106  
Identities = 239/251 (95%), Gaps = 0/251 (0%)  
Strand=Plus/Plus

```

Query 1041 GAGAAGAATCCTAGCAAATTAGTTAGATTAGAGACACATGAGTGGACACCAACATGGGCT 1100
|||||
Sbjct 252 GAGAAAAATCCTAGCAAATTTGGTTAGATTGGAGACACATGAGTGGACACCAACCTGGGCT 311
Query 1101 AGAGGACATCAGATAAACCATGTGGAATTGCCAAAAGTCTTTTGGGACAAAAACAGTAAG 1160
|||||
Sbjct 312 AGAGGACATCAGATAAACCATGTGGAACTACCAAAAAGTCTTTTGGGACAAAAACAGCAAG 371
Query 1161 CCAGCCTATGGCCAATCAAGATACTTTGCAGCAGTACGGTGTGGCTTTCATTTTCAGGTG 1220
|||||
Sbjct 372 CCAGCCTATGGCCAATCAAGATACTTTGCAGCAGTACGGTGTGGTTCATTTTCAGTA 431
Query 1221 CAAGTGAATGTTAACCAAGGAACAGCTGGTAGTGCATTGGTGGTGTATGAACCCAAACCT 1280
|||||
Sbjct 432 CAAGTGAATGTTAATCAAGGAACAGCCGGTAGTGCATTGGTGGTGTATGAACCCAAACCT 491
Query 1281 GTTGTGACATA 1291
|||||
Sbjct 492 GTTGTGACATA 502

```

>SRR2298546.818952 818952 length=500  
Length=500

Score = 429 bits (232), Expect = 7e-116  
Identities = 250/259 (97%), Gaps = 0/259 (0%)  
Strand=Plus/Minus

```

Query 381 TTTGCTGCAAAGCATCCTATTGCCAGCGGAACAACACCTGGTAACAGGTGCCTCTGGGGC 440
|||||
Sbjct 500 TTTGCTGTAAAGCATCCTATTGCCAGCGGAACAACACCTGGTAACAGGTGCCTCTGGGGC 441
Query 441 CAAAAGCCAAGGTCTAACAAAACCTTTAGGATTGGTTCTAAACCTGAGATGTTGTGGAAG 500
|||||
Sbjct 440 CAAAAGCCAAGGTTTAAACAAAACCTTTAGGATTGGTTATAAACCTGAGGTGTTGTGGAAG 381

```





Sbjct 432 TATGTTAAAAACAGATTCGTCAGACTTAGGGCAACTAAAAGTCTATGTTTGGACACCTTTA 491  
 Query 1461 TCTATACCTT 1470  
 || |||||  
 Sbjct 492 TCCATACCTT 501

Score = 403 bits (218), Expect = 4e-108  
 Identities = 240/251 (96%), Gaps = 0/251 (0%)  
 Strand=Plus/Minus

Query 1470 TCAGGTTCTGCGACACAAGTTGATGTAACCATATTTGGGTAGTTTATTGCAATTGGACTTC 1529  
 |||||  
 Sbjct 251 TCAGGTTCTGCTACACAAGTTGATGTTACCATATTTGGGTAGCTTATTGCAATTGGACTTC 192

Query 1530 CAAAATCCTAGGGTGTGGCCAAGACGTTGGTATCTATGATAATGCACCAACGCGGAAA 1589  
 |||||  
 Sbjct 191 CAAAATCCTAGGGTATTCGGTCAAGACGTTGGTATTTATGACAATGCACCAACGCGGAAG 132

Query 1590 CAAAATCTTAAAAAGATTCTTACAATGAGCACTAAAATACAAGTGGACTAGGGGAAAAAATT 1649  
 |||||  
 Sbjct 131 CAAAATCTTAAAGAAAATTCTTACAATGAGCACTAAAATACAAGTGGACTAGGGGAAAAAATT 72

Query 1650 GACATTGCAGAAGGGCCAGGTTCTATGAACATGGCGAACGTATTGAGTACCACTGCAGCG 1709  
 |||||  
 Sbjct 71 GACATTGCAGAAGGGCCAGGTTCTATGAACATGGCGAACGTATTGAGTACCACTGCAGCG 12

Query 1710 CAATCAATTGC 1720  
 |||||  
 Sbjct 11 CAATCAATTGC 1

>SRR2298546.429759 429759 length=502  
 Length=502

Score = 429 bits (232), Expect = 7e-116  
 Identities = 246/253 (97%), Gaps = 0/253 (0%)  
 Strand=Plus/Plus

Query 1221 CAAGTGAATGTTAACCAAGGAACAGCTGGTAGTGCATTGGTGGTGTATGAACCCAAACCT 1280  
 |||||  
 Sbjct 250 CAAGTGAATGTTAATCAAGGAACAGCCGGTAGTGCATTGGTGGTGTATGAACCCAAACCT 309

Query 1281 GTTGTGACATATGACTCAAAGTTAGAATTTGGAGCATTTACCAATTTACCACATGTATTG 1340  
 |||||  
 Sbjct 310 GTTGTGACATATGACTCAAAGTTAGAATTTGGAGCGTTTACCAATTTGCCACATGTGTTG 369

Query 1341 ATGAATTTGGCTGAGACCACACAGGCTGATTTATGTATCCCCTATGTTGCTGACACAAAC 1400  
 |||||  
 Sbjct 370 ATGAATTTGGCTGAGACCACACAGGCTGATTTATGTATCCCCTATGTTGCTGACACAAAC 429

Query 1401 TATGTTAAAAACGGATTCGTCAGACTTAGGGCAACTAAAAGTCTATGTTTGGACACCTTTA 1460  
 |||||  
 Sbjct 430 TATGTTAAAAACAGATTCGTCAGACTTAGGGCAACTAAAAGTCTATGTTTGGACACCTTTA 489

Query 1461 TCTATACCTTCAG 1473  
 || |||||  
 Sbjct 490 TCCATACCTTCAG 502

Score = 420 bits (227), Expect = 4e-113  
Identities = 243/251 (97%), Gaps = 0/251 (0%)  
Strand=Plus/Minus

```
Query 1292 TGACTCAAAGTTAGAATTTGGAGCATTTACCAATTTACCACATGTATTGATGAATTTGGC 1351
|||||
Sbjct 251 TGACTCAAAGTTAGAATTTGGAGCGTTTACCAATTTGCCACATGTGTTGATGAATTTGGC 192

Query 1352 TGAGACCACACAGGCTGATTTATGTATCCCCTATGTTGCTGACACAAACTATGTTAAAAC 1411
|||||
Sbjct 191 TGAGACCACACAGGCTGATTTATGTATCCCCTATGTTGCTGACACAAACTATGTTAAAAC 132

Query 1412 GGATTCGTCAGACTTAGGGCAACTAAAAGTCTATGTTTGGACACCTTTATCTATACCTTC 1471
|||||
Sbjct 131 AGATTCGTCAGACTTAGGGCAACTAAAAGTCTATGTTTGGACACCTTTATCCATACCTTC 72

Query 1472 AGGTTCTGCGACACAAGTTGATGTAACCATATTGGGTAGTTTATTGCAATTGGACTTCCA 1531
|||||
Sbjct 71 AGGTTCTGCTACACAAGTTGATGTTACCATATTGGGTAGCTTATTGCAATTGGACTTCCA 12

Query 1532 AAATCCTAGGG 1542
|||||
Sbjct 11 AAATCCTAGGG 1
```

>SRR2298546.424373 424373 length=501  
Length=501

Score = 429 bits (232), Expect = 7e-116  
Identities = 246/253 (97%), Gaps = 0/253 (0%)  
Strand=Plus/Plus

```
Query 380 TTTTGCTGCAAAGCATCCTATTGCCAGCGGAACAACACCTGGTAACAGGTGCCTCTGGGG 439
|||||
Sbjct 249 TTTTGCTGTAAAGCATCCTATTGCCAGCGGAACAACACCTGGTAACAGGTGCCTCTGGGG 308

Query 440 CAAAAAGCCAAGGTCTAACAAACCCTTTAGGATTGGTTCTAAACCTGAGATGTTGTGGAA 499
|||||
Sbjct 309 CAAAAAGCCAAGGTTTAACAAACCCTTTAGGATTGGTTATAAACCTGAGGTGTTGTGGAA 368

Query 500 GATACTTAGTACCTGCCGATCTGGTAGTACTGCAAACACTAGTTGTAAGGCCACGAAGG 559
|||||
Sbjct 369 GATACTTAGTACCTACCGATCTGGTAGTACTGCAAACACTAGTTGTAAGGCCACGAAGG 428

Query 560 ATGCCCAGAAGGTACCCATAGGTAACAAGTGACACTATGGATCTGATCTGGGGCCAGGTA 619
|||||
Sbjct 429 ATGCCCAGAAGGTACCCATAGGTAACAAGTGACACTATGGATCTGATTTGGGGCCAGGTA 488

Query 620 CCTCTATCTTGGT 632
|||||
Sbjct 489 CCTCTATCTTGGT 501
```

Score = 407 bits (220), Expect = 3e-109  
Identities = 240/250 (96%), Gaps = 0/250 (0%)  
Strand=Plus/Minus

```
Query 498 AAGATACTTAGTACCTGCCGATCTGGTAGTACTGCAAACACTAGTTGTAAGGCCACGAA 557
```

```

Sbjct 250 |||||
AAGATACTTAGTACCTACCGATCTGGTAGTAGTGCAAACACTAGTTGTAAGGCCACGAA 191
Query 558 GGATGCCCAGAAGGTACCCATAGGTAACAAGTGACACTATGGATCTGATCTGGGGCCAGG 617
|||||
Sbjct 190 GGATGCCCAGAAGGTACCCATAGGTAACAAGTGACACTATGGATCTGATTTGGGGCCAGG 131
Query 618 TACCTCTATCTTGGTGACCTGGTTAAAAAGCGTCTAGTGGGCCAAACCCgggggggATCC 677
|||||
Sbjct 130 TACCTCTATCTTGGTGATCTGGTTAAAAAACGTCTAGTGGGCCAAACCCGGGGGGGATCC 71
Query 678 CCGGTTTCCTTTTATTTTATCAATGCTACAATGGAGACAATTTAAAAGTATTGCAGATATG 737
|||||
Sbjct 70 CCGGTTTCCTTTTATTTTATCAATGCCATTATGGAGACAATTAAGAGTATTGCAGATATG 11
Query 738 GCGACCGGAG 747
|| |||||
Sbjct 10 GCAACCGGAG 1

```

>SRR2298546.317425 317425 length=500  
Length=500

Score = 429 bits (232), Expect = 7e-116  
Identities = 244/250 (98%), Gaps = 0/250 (0%)  
Strand=Plus/Minus

```

Query 1231 TTAACCAAGGAACAGCTGGTAGTGCATTGGTGGTGTATGAACCCAAACCTGTTGTGACAT 1290
|||||
Sbjct 250 TTAATCAAGGAACAGCCGGTAGTGCATTGGTGGTGTATGAACCCAAACCTGTTGTGACAT 191
Query 1291 ATGACTCAAAGTTAGAATTTGGAGCATTTACCAATTTACCACATGTATTGATGAATTTGG 1350
|||||
Sbjct 190 ATGACTCAAAGTTAGAATTTGGAGCGTTTACCAATTTACCACATGTGTTGATGAATTTGG 131
Query 1351 CTGAGACCACACAGGCTGATTTATGTATCCCCTATGTTGCTGACACAAACTATGTTAAAA 1410
|||||
Sbjct 130 CTGAGACCACACAGGCTGATTTATGTATCCCCTATGTTGCTGACACAAACTATGTTAAAA 71
Query 1411 CGGATTCGTCAGACTTAGGGCAACTAAAAGTCTATGTTTGGACACCTTTATCTATACCTT 1470
| |||||
Sbjct 70 CAGATTCGTCAGACTTAGGGCAACTAAAAGTCTATGTTTGGACACCTTTATCCATACCTT 11
Query 1471 CAGGTTCTGC 1480
|||||
Sbjct 10 CAGGTTCTGC 1

```

Score = 418 bits (226), Expect = 2e-112  
Identities = 242/250 (97%), Gaps = 0/250 (0%)  
Strand=Plus/Plus

```

Query 1146 GACAAAAACAGTAAGCCAGCCTATGGCCAATCAAGATACTTTGCAGCAGTACGGTGTGGC 1205
|||||
Sbjct 251 GACAAAAACAGCAAGCCAGCCTATGGCCAATCAAGATACTTTGCAGCAGTACGGTGTGGT 310
Query 1206 TTTCATTTTCAGGTGCAAGTGAATGTTAACCAAGGAACAGCTGGTAGTGCATTGGTGGTG 1265
|||||
Sbjct 311 TTTCATTTTCAGGTGCAAGTGAATGTTAATCAAGGAACAGCCGGTAGTGCATTGGTGGTG 370

```

```

Query 1266 TATGAACCCAAACCTGTTGTGACATATGACTCAAAGTTAGAATTTGGAGCATTACCAAT 1325
          |||
Sbjct 371 TATGAACCCAAACCTGTTGTGACATATGACTCAAAGTTAGAATTTGGAGCGTTTACCAAT 430

Query 1326 TTACCACATGTATTGATGAATTTGGCTGAGACCACACAGGCTGATTTATGTATCCCCTAT 1385
          |||
Sbjct 431 TTACCACATGTATTGATGAATTTGGCTGAGACCACACAGGCTGATTTATGTATCCCCTAT 490

Query 1386 GTTGCTGACA 1395
          |||
Sbjct 491 GTTGCTGACA 500

```

>SRR2298546.264343 264343 length=501  
Length=501

Score = 429 bits (232), Expect = 7e-116  
Identities = 242/247 (98%), Gaps = 0/247 (0%)  
Strand=Plus/Plus

```

Query 1249 GTAGTGCATTGGTGGTGTATGAACCCAAACCTGTTGTGACATATGACTCAAAGTTAGAAT 1308
          |||
Sbjct 252 GTAGTGCATTGGTGGTGTATGAACCCAAACCTGTTGTGACATATGACTCAAAGTTAGAAT 311

Query 1309 TTGGAGCATTACCAATTTACCACATGTATTGATGAATTTGGCTGAGACCACACAGGCTG 1368
          |||
Sbjct 312 TTGGAGCGTTTACCAATTTACCACATGTATTGATGAATTTGGCTGAGACCACACAGGCTG 371

Query 1369 ATTTATGTATCCCCTATGTTGCTGACACAAACTATGTTAAAACGGATTCGTCAGACTTAG 1428
          |||
Sbjct 372 ATTTATGTATCCCCTATGTTGCTGACACAAACTATGTTAAAACAGATTCGTCAGACTTAG 431

Query 1429 GGCAACTAAAAGTCTATGTTTGGACACCTTTATCTATACCTTCAGGTTCTGCGACACAAG 1488
          |||
Sbjct 432 GGCAACTAAAAGTCTATGTTTGGACACCTTTATCCATACCTTCAGGTTCTGCTACACAAG 491

Query 1489 TTGATGT 1495
          |||
Sbjct 492 TTGATGT 498

```

Score = 409 bits (221), Expect = 9e-110  
Identities = 241/251 (96%), Gaps = 0/251 (0%)  
Strand=Plus/Minus

```

Query 1307 ATTTGGAGCATTACCAATTTACCACATGTATTGATGAATTTGGCTGAGACCACACAGGC 1366
          |||
Sbjct 251 ATTTGGAGCGTTTACCAATTTACCACATGTATTGATGAATTTGGCTGAGACCACACAGGC 192

Query 1367 TGATTTATGTATCCCCTATGTTGCTGACACAAACTATGTTAAAACGGATTCGTCAGACTT 1426
          |||
Sbjct 191 TGATTTATGTATCCCCTATGTTGCTGACACAAACTATGTTAAAACAGATTCGTCAGACTT 132

Query 1427 AGGGCAACTAAAAGTCTATGTTTGGACACCTTTATCTATACCTTCAGGTTCTGCGACACA 1486
          |||
Sbjct 131 AGGGCAACTAAAAGTCTATGTTTGGACACCTTTATCCATACCTTCAGGTTCTGCTACACA 72

Query 1487 AGTTGATGTAACCATATTGGGTAGTTTATTGCAATTGGACTTCCAAAATCCTAGGGTGT 1546

```

```

Sbjct 71      ||||||| ||||||| ||||||| ||||||| ||||||| ||||||| ||||||| ||||||| ||||||| ||
AGTTGATGTTACCATATTGGGTAGCTTATTGCAATTGGACTTCCAAAATCCTAGGGTATT 12
Query 1547  TGGCCAAGACG 1557
          || |||||||
Sbjct 11     CGGTCAAGACG 1

```

>SRR2298382.75729 75729 length=501  
Length=501

Score = 429 bits (232), Expect = 7e-116  
Identities = 244/250 (98%), Gaps = 0/250 (0%)  
Strand=Plus/Plus

```

Query 428  GTGCCTCTGGGGCCAAAAGCCAAGGTCTAACAAACCCCTTTAGGATTGGTTCTAAACCTGA 487
          ||||||| ||||||| ||||||| ||||||| ||||||| ||||||| ||||||| ||||||| ||
Sbjct 1     GTGCCTCTGGGGCCAAAAGCCAAGGTCTAACAAACCCCTTTAGGATTGGTTCTAAACCTGA 60

Query 488  GATGTTGTGGAAGATACTTAGTACCTGCCGATCTGGTAGTACTGCAAACACTAGTTGTAA 547
          ||||||| ||||||| ||||||| ||||||| ||||||| ||||||| ||||||| ||||||| ||
Sbjct 61   GATGTTGTGGAAGATACTTAGTACCTACCGATCTGGTAGTACTGCAAACACTAGTTGTAA 120

Query 548  GGCCACGAAGGATGCCCAGAAGGTACCCATAGGTAACAAGTGACACTATGGATCTGATC 607
          ||||||| ||||||| ||||||| ||||||| ||||||| ||||||| ||||||| ||||||| ||
Sbjct 121  GGCCACGAAGGATGCCCAGAAGGTACCCATAGGTAACAAGCGACACTATGGATCTGATC 180

Query 608  TGGGGCCAGGTACCTCTATCTTGGTGACCTGGTTAAAAAGCGTCTAGTGGGGCCAAACCCg 667
          ||||||| ||||||| ||||||| ||||||| ||||||| ||||||| ||||||| ||||||| ||
Sbjct 181  TGGGGCCAGGTACCTCTATCTTGGTGATCTGGTTAAAAAACGTCTAGTGGGGCCAAACCCG 240

Query 668  ggggggATCC 677
          |||||||
Sbjct 241  GGGGGGATCC 250

```

Score = 414 bits (224), Expect = 2e-111  
Identities = 242/251 (96%), Gaps = 0/251 (0%)  
Strand=Plus/Minus

```

Query 484  CTGAGATGTTGTGGAAGATACTTAGTACCTGCCGATCTGGTAGTACTGCAAACACTAGTT 543
          ||||||| ||||||| ||||||| ||||||| ||||||| ||||||| ||||||| ||||||| ||
Sbjct 501  CTGAGATGTTGTGGAAGATTCTTAGTACCTACCGATCTGGTAGTACTGCAAACACTAGTT 442

Query 544  GTAAGGCCACGAAGGATGCCCAGAAGGTACCCATAGGTAACAAGTGACACTATGGATCT 603
          ||||||| ||||||| ||||||| ||||||| ||||||| ||||||| ||||||| ||||||| ||
Sbjct 441  GTAAGGCCACGAAGGATGCCCAGAAGGTACCCATAGGTAACAAGCGACACTATGGATCT 382

Query 604  GATCTGGGGCCAGGTACCTCTATCTTGGTGACCTGGTTAAAAAGCGTCTAGTGGGGCCAAA 663
          ||||||| ||||||| ||||||| ||||||| ||||||| ||||||| ||||||| ||||||| ||
Sbjct 381  GATCTGGGGCCAGGTACCTCTATCTTGGTGATCTGGTTAAAAAACGTCTAGTGGGGCCAAA 322

Query 664  CCCgggggggATCCCCGGTTTCCTTTTATTTTATCAATGCTACAATGGAGACAATTAATA 723
          ||||||| ||||||| ||||||| ||||||| ||||||| ||||||| ||||||| ||||||| ||
Sbjct 321  CCCGGGGGGGATCCCCGGTTTCCTTTTATTTTATCAATGCCACTATGGAGACAATTAAGA 262

Query 724  GTATTGCAGAT 734
          |||||||
Sbjct 261  GTATTGCAGAT 251

```

>SRR2298382.11686 11686 length=501  
Length=501

Score = 429 bits (232), Expect = 7e-116  
Identities = 244/250 (98%), Gaps = 0/250 (0%)  
Strand=Plus/Plus

```
Query 414 ACACCTGGTAAACAGGTGCCTCTGGGGCCAAAAGCCAAGGTCTAACAAACCCTTTAGGATT 473
          |||
Sbjct 1 ACACCTGGTAAACAGGTGCCTCTGGGGCCAAAAGCCAAGGTTAACAAACCCTTTAGGATT 60

Query 474 GGTTCCTAAACCTGAGATGTTGTGGAAGATACTTAGTACCTGCCGATCTGGTAGTACTGCA 533
          |||
Sbjct 61 GGTTCCTAAACCTGAGATGTTGTGGAAGATACTTAGTACCTACCGATCTGGTAGTACTGCA 120

Query 534 AACACTAGTTGTAAGGCCACGAAGGATGCCAGAAAGGTACCCATAGGTAACAAGTGACA 593
          |||
Sbjct 121 AACACTAGTTGTAAGGCCACGAAGGATGCCAGAAAGGTACCCATAGGTAACAAGCGACA 180

Query 594 CTATGGATCTGATCTGGGGCCAGGTACCTCTATCTTGGTGACCTGGTTAAAAAGCGTCTA 653
          |||
Sbjct 181 CTATGGATCTGATCTGGGGCCAGGTACCTCTATCTTGGTGATCTGGTTAAAAAACGTCTA 240

Query 654 GTGGGCCAAA 663
          |||
Sbjct 241 GTGGGCCAAA 250
```

Score = 418 bits (226), Expect = 2e-112  
Identities = 242/250 (97%), Gaps = 0/250 (0%)  
Strand=Plus/Minus

```
Query 481 AACCTGAGATGTTGTGGAAGATACTTAGTACCTGCCGATCTGGTAGTACTGCAAACACTA 540
          |||
Sbjct 500 AACCTGAGATGTTGTGGAAGATACTTAGTACCTACCGATCTGGTAGTAGTGCAAACACTA 441

Query 541 GTTGTAAAGGCCACGAAGGATGCCAGAAAGGTACCCATAGGTAACAAGTGACACTATGGA 600
          |||
Sbjct 440 GTTGTAAAGGCCACGAAGGATGCCAGAAAGGTACCCATAGGTAACAAGCGACACTATGGA 381

Query 601 TCTGATCTGGGGCCAGGTACCTCTATCTTGGTGACCTGGTTAAAAAGCGTCTAGTGGGCC 660
          |||
Sbjct 380 TCTGATCTGGGGCCAGGTACCTCTATCTTGGTGATCTGGTTAAAAAACGCTAGTGGGCC 321

Query 661 AAACCCgggggggATCCCCGGTTTCCTTTTATTTTATCAATGCTACAATGGAGACAATTA 720
          |||
Sbjct 320 AAACCCGGGGGGGATCCCCGGTTTCCTTTTATTTTATCAATGCCACTATGGAGACAATTA 261

Query 721 AAAGTATTGC 730
          | |||
Sbjct 260 AGAGTATTGC 251
```

>SRR2298578.1031647 1031647 length=500  
Length=500

Score = 427 bits (231), Expect = 3e-115

Identities = 243/249 (98%), Gaps = 0/249 (0%)  
Strand=Plus/Minus

```
Query 1227 AATGTTAACCAAGGAACAGCTGGTAGTGCATTGGTGGTGTATGAACCCAAACCTGTTGTG 1286
          |||
Sbjct 249 AATGTTAATCAAGGAACAGCTGGTAGTGCATTGGTGGTGTATGAACCCAAACCCGTTGTG 190

Query 1287 ACATATGACTCAAAGTTAGAATTTGGAGCATTACCAATTTACCACATGTATTGATGAAT 1346
          |||
Sbjct 189 ACATATGACTCAAAGTTAGAATTTGGAGCATTACCAATCTACCACATGTGTTGATGAAT 130

Query 1347 TTGGCTGAGACCACACAGGCTGATTTATGTATCCCCTATGTTGCTGACACAAACTATGTT 1406
          |||
Sbjct 129 TTGGCTGAGACCACACAGGCTGATTTATGTATCCCCTATGTTGCTGACACAAACTATGTT 70

Query 1407 AAAACGGATTTCGTCAGACTTAGGGCAACTAAAAGTCTATGTTTGGACACCTTTATCTATA 1466
          |||
Sbjct 69 AAAACAGATTTCGTCAGACTTAGGGCAACTAAAAGTCTATGTTTGGACACCTTTATCCATA 10

Query 1467 CCTTCAGGT 1475
          |||
Sbjct 9 CCTTCAGGT 1
```

Score = 137 bits (74), Expect = 5e-28  
Identities = 88/95 (93%), Gaps = 0/95 (0%)  
Strand=Plus/Plus

```
Query 1190 AGCAGTACGGTGTGGCTTTTCATTTTCAGGTGCAAGTGAATGTTAACCAAGGAACAGCTGG 1249
          |||
Sbjct 394 AGCAGTACGGTGTGGTTTTTCACTTTCAAGTGAAGGGAATGTTAATCAAGGAACAGCTGG 453

Query 1250 TAGTGCATTGGTGGTGTATGAACCCAAACCTGTTG 1284
          |||
Sbjct 454 TAGTGCATTGGTGGTGTATGAACCCAAACCCGTTG 488
```

>SRR2298578.969663 969663 length=500  
Length=500

Score = 427 bits (231), Expect = 3e-115  
Identities = 243/249 (98%), Gaps = 0/249 (0%)  
Strand=Plus/Plus

```
Query 1252 GTGCATTGGTGGTGTATGAACCCAAACCTGTTGTGACATATGACTCAAAGTTAGAATTTG 1311
          |||
Sbjct 1 GTGCATTGGTGGTGTATGAACCCAAACCCGTTGTGACATATGACTCAAAGTTAGAATTTG 60

Query 1312 GAGCATTTACCAATTTACCACATGTATTGATGAATTTGGCTGAGACCACACAGGCTGATT 1371
          |||
Sbjct 61 GAGCATTTACCAATCTACCACATGTGTTGATGAATTTGGCTGAGACCACACAGGCTGATT 120

Query 1372 TATGTATCCCCTATGTTGCTGACACAAACTATGTTAAAACGGATTTCGTCAGACTTAGGGC 1431
          |||
Sbjct 121 TATGTATCCCCTATGTTGCTGACACAAACTATGTTAAAACAGATTTCGTCAGACTTAGGGC 180

Query 1432 AACTAAAAGTCTATGTTTGGACACCTTTATCTATAACCTTCAGGTTCTGCGACACAAGTTG 1491
          |||
Sbjct 181 AACTAAAAGTCTATGTTTGGACACCTTTATCCATAACCTTCAGGTTCTGCTACACAAGTTG 240
```

```
Query 1492 ATGTAACCA 1500
          |||
Sbjct 241 ATGTAACCA 249
```

Score = 375 bits (203), Expect = 9e-100  
Identities = 235/251 (94%), Gaps = 0/251 (0%)  
Strand=Plus/Minus

```
Query 1312 GAGCATTACCAATTTACCACATGTATTGATGAATTTGGCTGAGACCACACAGGCTGATT 1371
          |||
Sbjct 500 GAGCCTTTTCCAATCTTCCCATGTGTTGATGAATTTGGCTGAGACCAACAGGCTGATT 441
```

```
Query 1372 TATGTATCCCCTATGTTGCTGACACAAACTATGTTAAAACGGATTCGTCAGACTTAGGGC 1431
          |||
Sbjct 440 TATGTATCCCCTATGTTGCTGACACAAACTATGTTAAAACAGATTCGTCAGACTTAGGGC 381
```

```
Query 1432 AACTAAAAGTCTATGTTTGGACACCTTTATCTATACCTTCAGGTTCTGCGACACAAGTTG 1491
          |||
Sbjct 380 AACTAAAAGTCTATGTTTGGACACCTTTATCCATACCTTCAGGTTCTGCTACACAAGTTG 321
```

```
Query 1492 ATGTAACCATATTTGGGTAGTTTATTGCAATTGGACTTCCAAAATCCTAGGGTGTGGCC 1551
          |||
Sbjct 320 ATGTAACCATATTTGGGTAGCCTATTGCAATTGGACTTCCAAAACCCTAGGGTATTGCGCC 261
```

```
Query 1552 AAGACGTTGGT 1562
          |
Sbjct 260 AGGACGTTGGT 250
```

>SRR2298578.960513 960513 length=500  
Length=500

Score = 427 bits (231), Expect = 3e-115  
Identities = 246/253 (97%), Gaps = 1/253 (0%)  
Strand=Plus/Minus

```
Query 1211 TTT-TCAGGTGCAAGTGAATGTTAACCAAGGAACAGCTGGTAGTGCATTGGTGGTGTATG 1269
          |||
Sbjct 254 TTTGTCAAGTGCAAGTGAATGTTAATCAAGGAACAGCTGGTAGTGCATTGGTGGTGTATG 195
```

```
Query 1270 AACCCAAACCTGTTGTGACATATGACTCAAAGTTAGAATTTGGAGCATTTACCAATTTAC 1329
          |||
Sbjct 194 AACCCAAACCCGTTGTGACATATGACTCAAAGTTAGAATTTGGAGCATTTACCAATCTAC 135
```

```
Query 1330 CACATGTATTGATGAATTTGGCTGAGACCACACAGGCTGATTTATGTATCCCCTATGTTG 1389
          |||
Sbjct 134 CACATGTGTTGATGAATTTGGCTGAGACCACACAGGCTGATTTATGTATCCCCTATGTTG 75
```

```
Query 1390 CTGACACAAACTATGTTAAAACGGATTCGTCAGACTTAGGGCAACTAAAAGTCTATGTTT 1449
          |||
Sbjct 74 CTGACACAAACTATGTTAAAACAGATTCGTCAGACTTAGGGCAACTAAAAGTCTATGTTT 15
```

```
Query 1450 GGACACCTTTATC 1462
          |||
Sbjct 14 GGACACCTTTATC 2
```





```

Sbjct 256 GTACGGTGTGGTTTTTCACTTTCAAGTGCAAGTGAATGTTAATCAAGGAACAGCTGGTAGT 315
Query 1254 GCATTGGTGGTGTATGAACCCAAACCTGTTGTGACATATGACTCAAAGTTAGAATTTGGA 1313
          |||
Sbjct 316 GCATTGGTGGTGTATGAACCCAAACCCGTTGTGACATATGACTCAAAGTTAGAATTTGGA 375
Query 1314 GCATTTACCAATTTACCACATGTATTGATGAATTTGGCTGAGACCACACAGGCTGATTTA 1373
          |||
Sbjct 376 GCATTTACCAATCTACCACATGTGTTGATGAATTTGGCTGAGACAACACAGGCTGATTTA 435
Query 1374 TGTATCCCCTATGTTGCTGACACAAACTATGTTAAAACGGATTCGTCAGACTTAGGGCAA 1433
          |||
Sbjct 436 TGTATCCCCTATGTTGCTGACACAAACCATCTTAAAACAGATTCGTCAGACTTAGGGCAA 495
Query 1434 CTAAA 1438
          |||
Sbjct 496 CTAAA 500

```

>SRR2298578.380777 380777 length=500  
Length=500

Score = 427 bits (231), Expect = 3e-115  
Identities = 243/249 (98%), Gaps = 0/249 (0%)  
Strand=Plus/Plus

```

Query 1252 GTGCATTGGTGGTGTATGAACCCAAACCTGTTGTGACATATGACTCAAAGTTAGAATTTG 1311
          |||
Sbjct 1 GTGCATTGGTGGTGTATGAACCCAAACCCGTTGTGACATATGACTCAAAGTTAGAATTTG 60
Query 1312 GAGCATTTACCAATTTACCACATGTATTGATGAATTTGGCTGAGACCACACAGGCTGATT 1371
          |||
Sbjct 61 GAGCATTTACCAATCTACCACATGTGTTGATGAATTTGGCTGAGACCACACAGGCTGATT 120
Query 1372 TATGTATCCCCTATGTTGCTGACACAAACTATGTTAAAACGGATTCGTCAGACTTAGGGC 1431
          |||
Sbjct 121 TATGTATCCCCTATGTTGCTGACACAAACTATGTTAAAACAGATTCGTCAGACTTAGGGC 180
Query 1432 AACTAAAAGTCTATGTTTGGACACCTTTATCTATACCTTCAGGTTCTGCGACACAAGTTG 1491
          |||
Sbjct 181 AACTAAAAGTCTATGTTTGGACACCTTTATCCATACCTTCAGGTTCTGCTACACAAGTTG 240
Query 1492 ATGTAACCA 1500
          |||
Sbjct 241 ATGTAACCA 249

```

Score = 388 bits (210), Expect = 1e-103  
Identities = 236/249 (95%), Gaps = 0/249 (0%)  
Strand=Plus/Minus

```

Query 1270 AACCCAAACCTGTTGTGACATATGACTCAAAGTTAGAATTTGGAGCATTTACCAATTTAC 1329
          |||
Sbjct 499 AACCCAAACCCGTTGTACATTTGCCTTAAAGTTAGAATTTGGAGCATTTACCAATCTTC 440
Query 1330 CACATGTATTGATGAATTTGGCTGAGACCACACAGGCTGATTTATGTATCCCCTATGTTG 1389
          |||
Sbjct 439 CACATGTGTTGATGAATTTGGCTGAGACCACACAGGCTGATTTATGTATCCCCTATGTTG 380

```



Sbjct 374 GTTTATCTAAAAATTGTTTCCCAACTTGAATGTTTTTGTCAACAGCTACTCATATTTTAGA 315  
 Query 1980 GGCTCAATAGTGCTG 1994  
 || |||||  
 Sbjct 314 GGATCAATAGTGCTG 300

>SRR2298578.142685 142685 length=500  
 Length=500

Score = 427 bits (231), Expect = 3e-115  
 Identities = 246/253 (97%), Gaps = 1/253 (0%)  
 Strand=Plus/Minus

Query 1256 ATTGGTGGTGTATGAACCCAAACCTGTTGTGACATATGACTCAAAGTTAGAATTTGGAGC 1315  
 |||||  
 Sbjct 252 ATTGGTGGT-TATGAACCCAAACCCGTTGTGACATATGACTCAAAGTTAGAATTTGGAGC 194  
 Query 1316 ATTTACCAATTTACCACATGTATTGATGAATTTGGCTGAGACCACACAGGCTGATTTATG 1375  
 |||||  
 Sbjct 193 ATTTACCAATCTACCACATGTGTTGATGAATTTGGCTGAGACCACACAGGCTGATTTATG 134  
 Query 1376 TATCCCCTATGTTGCTGACACAAACTATGTTAAAACGGATTCGTCAGACTTAGGGCAACT 1435  
 |||||  
 Sbjct 133 TATCCCCTATGTTGCTGACACAAACTATGTTAAAACAGATTCGTCAGACTTAGGGCAACT 74  
 Query 1436 AAAAGTCTATGTTTGGACACCTTTATCTATACCTTCAGGTTCTGCGACACAAGTTGATGT 1495  
 |||||  
 Sbjct 73 AAAAGTCTATGTTTGGACACCTTTATCCATACCTTCAGGTTCTGCTACACAAGTTGATGT 14  
 Query 1496 AACCATATTGGGT 1508  
 |||||  
 Sbjct 13 AACCATATTGGGT 1

Score = 392 bits (212), Expect = 9e-105  
 Identities = 238/251 (95%), Gaps = 0/251 (0%)  
 Strand=Plus/Plus

Query 1047 AATCCTAGCAAATTAGTTAGATTAGAGACACATGAGTGGACACCAACATGGGCTAGAGGA 1106  
 |||||  
 Sbjct 250 AATCCTAGCAAATTGTTAGATTGGAGACACATGAGTGGACACCAACCTGGGCTAGAGGA 309  
 Query 1107 CATCAGATAACCCATGTGGAATTGCCAAAAGTCTTTTGGGACAAAAACAGTAAGCCAGCC 1166  
 |||||  
 Sbjct 310 CATCAGATAACTCATGTGGAATTACCAAAAAGTCTTTTGGGACAAAAACAGCAAGCCAGCC 369  
 Query 1167 TATGGCCAATCAAGATACTTTGCAGCAGTACGGTGTGGCTTTCATTTTCAGGTGCAAGTG 1226  
 |||||  
 Sbjct 370 TATGGCCAATCAAGATACTTTGCAGCAGTACGGTGTGGTTTTCACTTTCAGGTGCAAGTG 429  
 Query 1227 AATGTTAACCAAGGAACAGCTGGTAGTGCATTGGTGGTGTATGAACCCAAACCTGTTGTG 1286  
 |||||  
 Sbjct 430 AATGTTAATCAAGGAACAGCTGGAAGTGCATTGGTGGTGTATGAACCCAAACCCGTTGTG 489  
 Query 1287 ACATATGACTC 1297  
 |||||  
 Sbjct 490 ACAAATGACTC 500

>SRR2298578.41611 41611 length=500  
Length=500

Score = 427 bits (231), Expect = 3e-115  
Identities = 245/252 (97%), Gaps = 0/252 (0%)  
Strand=Plus/Minus

```
Query 1257 TTGGTGGTGTATGAACCCAAACCTGTTGTGACATATGACTCAAAGTTAGAATTTGGAGCA 1316
          |||
Sbjct 252 TTGGTGGTGTATGAACCCAAACCCGTTGTGACATATGGCTCAAAGTTAGAATTTGGAGCA 193

Query 1317 TTTACCAATTTACCACATGTATTGATGAATTTGGCTGAGACCACACAGGCTGATTTATGT 1376
          |||
Sbjct 192 TTTACCAATCTACCACATGTGTTGATGAATTTGGCTGAGACCACACAGGCTGATTTATGT 133

Query 1377 ATCCCCTATGTTGCTGACACAAACTATGTTAAAACGGATTCGTCAGACTTAGGGCAACTA 1436
          |||
Sbjct 132 ATCCCCTATGTTGCTGACACAAACTATGTTAAAACAGATTCGTCAGACTTAGGGCAACTA 73

Query 1437 AAAGTCTATGTTTGGACACCTTTATCTATACCTTCAGGTTCTGCGACACAAGTTGATGTA 1496
          |||
Sbjct 72 AAAGTCTATGTTTGGACACCTTTATCCATACCTTCAGGTTCTGCTACACAAGTTGATGTA 13

Query 1497 ACCATATTGGGT 1508
          |||
Sbjct 12 ACCATATTGGGT 1
```

Score = 344 bits (186), Expect = 3e-90  
Identities = 228/249 (92%), Gaps = 0/249 (0%)  
Strand=Plus/Plus

```
Query 1244 AGCTGGTAGTGCATTGGTGGTGTATGAACCCAAACCTGTTGTGACATATGACTCAAAGTT 1303
          |||
Sbjct 252 AGCTGATAGGGCATTGGTGGTGCATGAACCCAAACCCGTTGTGACATATGACTCAAAGTT 311

Query 1304 AGAATTTGGAGCATTTACCAATTTACCACATGTATTGATGAATTTGGCTGAGACCACACA 1363
          |||
Sbjct 312 AGAATTTGGAGCATATACCAATCTATCAAATGCGTTGATGAATTTGGCTGAGACCACACA 371

Query 1364 GGCTGATTTATGTATCCCCTATGTTGCTGACACAAACTATGTTAAAACGGATTCGTCAGA 1423
          |||
Sbjct 372 GGCTGATTTATGTATCCCCTATGTTGCTGACACAAACTATGTTAAAACAGATTCGTCAGA 431

Query 1424 CTTAGGGCAACTAAAAGTCTATGTTTGGACACCTTTATCTATACCTTCAGGTTCTGCGAC 1483
          |||
Sbjct 432 CTTAGGGCAACTAAAAGTCTATGTTTCGAACAACCTTTATCCATACCATAAGGTTCTGCTCA 491

Query 1484 ACAAGTTGA 1492
          |||
Sbjct 492 ACAAGTTGA 500
```

>SRR2298573.879666 879666 length=500  
Length=500

Score = 427 bits (231), Expect = 3e-115  
Identities = 243/249 (98%), Gaps = 0/249 (0%)

Strand=Plus/Plus

```
Query 345 GTCTGGTGACGTGTGGGAACTTATTGGAAGCAACATTTTGCTGCAAAGCATCCTATTGCC 404
          |||
Sbjct 1 GTCTGGTGACGTGTGGGAACTTATTGGAACAACATTTTGCTGTAAAGCATCCTATTGCC 60

Query 405 AGCGGAACAACACCTGGTAACAGGTGCCTCTGGGGCCAAAAGCCAAGGTCTAACAAACCC 464
          |||
Sbjct 61 AGCGGAACAACACCTGGTAACAGGTGCCTCTGGGGCCAAAAGCCAAGGTTTAAACAAACCC 120

Query 465 TTTAGGATTGGTTCTAAACCTGAGATGTTGTGGAAGATACTTAGTACCTGCCGATCTGGT 524
          |||
Sbjct 121 TTTAGGATTGGTTCTAAACCTGAGATGTTGTGGAAGATACTTAGTACCTACCGATCTGGT 180

Query 525 AGTACTGCAAACACTAGTTGTAAGGCCACGAAGGATGCCCAGAAGGTACCCATAGGTAA 584
          |||
Sbjct 181 AGTAGTGCAAACACTAGTTGTAAGGCCACGAAGGATGCCCAGAAGGTACCCATAGGTAA 240

Query 585 CAAGTGACA 593
          |||
Sbjct 241 CAAGCGACA 249
```

Score = 368 bits (199), Expect = 2e-97  
Identities = 231/247 (94%), Gaps = 0/247 (0%)  
Strand=Plus/Minus

```
Query 530 TGCAAACACTAGTTGTAAGGCCACGAAGGATGCCCAGAAGGTACCCATAGGTAACAAGT 589
          |||
Sbjct 497 TGCAAACACTTGTFTTAAAGGCCCGGAGGTTTCCAGAAGGTACCCAATGGTAACCAGC 438

Query 590 GACACTATGGATCTGATCTGGGGCCAGGTACCTCTATCTTGGTGACCTGGTTAAAAAGCG 649
          |||
Sbjct 437 GACACTATGGATCTGATCTGGGGCCAGGTACCTCTAGCTTGGTGATCTGGTTAAAAAACG 378

Query 650 TCTAGTGGGCCAAAACCCggggggggATCCCCGGTTTCCTTTTATTTTATCAATGCTACAAT 709
          |||
Sbjct 377 TCTAGTGGGCCAAAACCCGGGGGGGATCCCCGGTTTCCTTTTATTTTATCAATGCCACTAT 318

Query 710 GGAGACAATTAAGATATTGCAGATATGGCGACCGGAGTGGTCAGTTCAGTTGATTCCAC 769
          |||
Sbjct 317 GGAGACAATTAAGAGTATTGCAGATATGGCGACCGGAGTGGTCAGTTCAGTTGATTCCAC 258

Query 770 TATCAAT 776
          |||
Sbjct 257 TATCAAT 251
```

>SRR2298573.865740 865740 length=500  
Length=500

Score = 427 bits (231), Expect = 3e-115  
Identities = 243/249 (98%), Gaps = 0/249 (0%)  
Strand=Plus/Plus

```
Query 455 TAACAAACCCTTTAGGATTGGTTCTAAACCTGAGATGTTGTGGAAGATACTTAGTACCTG 514
          |||
Sbjct 251 TAACAAACCCTTTAGGATTGGTTCTAAACCTGAGATGTTGTGGAAGATACTTAGTACCTA 310
```

```

Query 515 CCGATCTGGTAGTACTGCAAACACTAGTTGTAAGGCCACGAAGGATGCCCAGAAGGTAC 574
          |||
Sbjct 311 CCGATCTGGTAGTAGTGCAAACACTAGTTGTAAGGCCACGAAGGATGCCCAGAAGGTAC 370

Query 575 CCATAGGTAACAAGTGACACTATGGATCTGATCTGGGGCCAGGTACCTCTATCTTGGTGA 634
          |||
Sbjct 371 CCATAGGTAACAAGCGACACTATGGATCTGATCTGGGGCCAGGTACCTCTATCTTGGGGA 430

Query 635 CCTGGTTAAAAAGCGTCTAGTGGGCCAAACCCgggggggATCCCCGGTTTCCTTTTATTT 694
          |||
Sbjct 431 TCTGGTTAAAAAACGTCTAGTGGGCCAAACCCGGGGGGGATCCCCGGTTTCCTTTTATTT 490

Query 695 TATCAATGC 703
          |||
Sbjct 491 TATCAATGC 499

```

Score = 405 bits (219), Expect = 1e-108  
 Identities = 239/249 (96%), Gaps = 0/249 (0%)  
 Strand=Plus/Minus

```

Query 540 AGTTGTAAGGCCACGAAGGATGCCCAGAAGGTACCCATAGGTAACAAGTGACACTATGG 599
          |||
Sbjct 249 AGTTGTAAGGCCACGAAGGATGCCCAGAAGGTGCCATAGGTAACAAGCGACACTATGG 190

Query 600 ATCTGATCTGGGGCCAGGTACCTCTATCTTGGTGACCTGGTTAAAAAGCGTCTAGTGGGC 659
          |||
Sbjct 189 ATCTGATCTGGGGCCAGGTACCTCTATCTTGGTGATCTGGTTAAAAAACGTCTAGTGGGC 130

Query 660 CAAACCCgggggggATCCCCGGTTTCCTTTTATTTTATCAATGCTACAATGGAGACAATT 719
          |||
Sbjct 129 CAAACCCGGGGGGATCCCCGGTTTCCTTTTATTTTATCAATGCCACTATGGAGACAATT 70

Query 720 AAAAGTATTGCAGATATGGCGACCGGAGTGGTCAGTTCAGTTGATTCCACTATCAATGCA 779
          |||
Sbjct 69 AAGAGTATTGCAGATACGGCGACCGGAGTGGTCAGTTCAGTTGATTCCACTATCAATGTA 10

Query 780 GTTAATGAG 788
          |||
Sbjct 9 GTTAATGAG 1

```

Lambda K H  
 1.33 0.621 1.12

Gapped  
 Lambda K H  
 1.28 0.460 0.850

Effective search space used: 143028841133916

Database: virome\_reads.fasta  
 Posted date: Aug 31, 2017 9:43 AM  
 Number of letters in database: 21,830,462,082

Number of sequences in database: 64,922,850

Matrix: blastn matrix 1 -2  
Gap Penalties: Existence: 0, Extension: 2.5

BLASTN 2.6.0+

Reference: Zheng Zhang, Scott Schwartz, Lukas Wagner, and Webb Miller (2000), "A greedy algorithm for aligning DNA sequences", J Comput Biol 2000; 7(1-2):203-14.

Database: virome\_reads.fasta  
64,922,850 sequences; 21,830,462,082 total letters

### The full length reads that gave significant hits for LCDV-Sa.

```
>SRR2298382.126301 126301 length=502
GATAGGCCACAAAGGCCCTCAAGGCTTGACTGGCCACAAAGGGCAACGTGGGGAAACTGGTCAACAAGGTTTGCAAGGAC
CTGTTGGACCTGCTGGACCTAAAAGGCGATACTGGACCTAAAAGGAGCGGACGGACTACAAGGCCCTATTTGGCCCTCAAGGT
TTGCAAGGCGAGCAAGGCCGTGACGGCGTAGGAATCCCGCAAAAGCTGACCTTATCAGGAAACACACTCACGCTGTCAGA
CGGTGGGGGAAACTTGGTAGCGTTACACTTCCCCACCGTCTGACAGCGTGAGTGTGTTTCCTGATAAGGTCAGCTTTTG
CGGATTCTACGCCGTACGGCCTTGCTCGCCTTGCAAACCTTGAGGGCAATAGGGCCTTGTAGTCCGTCCGCTCCTT
TAGGTCCAGTATCGCCTTTAGGTCCAGCAGGTCCAACAGGTCTTGCAAACCTTGTGACCAGTTTCCCCACGTTGCCCT
TGTGGGCCAGTCAAGCCTTGAG
>SRR2298382.124650 124650 length=156
ACGTGGGGAAACTGGTCAACAAGGTTTGCAAGGACCTGTTGGACCTGCTGGACCTAAAAGGCGATACTGGACCTAAAAGGCC
TTTAGGTCCAGTATCGCCTTTAGGTCCAGCAGGTCCAACAGGTCTTGCAAACCTTGTGACCAGTTTCCCCACGT
>SRR2298382.122212 122212 length=190
ACGTGGGGAAACTGGTCAACAATGTTTGCAAGGACCTGTTGGACCTGCTGGACCTAAAAGGCGATACTGGACCTAAAAGGAG
CGGACGGACTACAAGCTTGTAGTCCGTCCGCTCCTTTAGGTCCAGTATCGCCTTTAGGTCCAGCAGGTCCAACAGGTCTT
TGCAAACATTTGTTGACCAGTTTCCCCACGT
>SRR2298382.118813 118813 length=192
TGGGGAAACTGGTCAACAAGGTTTGCAAGGACCTGTTGGACCTGCTGGAACCTAAAAGGCGATACTGGACCTAAAAGGAGCGG
ACGGACTACAAGGCCCGGGCCTTGTAGTCCGTCCGCTCCTTTAGGTCCAGTATCGCCTTTAGGTCCAGCAGGTCCAACAG
GTCTTTGCAAACCTTGTGTTGACCAGTTTCCCCA
>SRR2298382.112002 112002 length=344
GGGGAAACTGGTCAACAAGGTTTGCAAGGACCTGTTGGACCTGCTGGACCTAAAAGGCGATACTGGACCTAAAAGGAGCGGC
CGGACTACAAGGCTGTTCTCTTATACACATCTCCGAGCCCACGAGACTCCTGAGCATCTCGTATGCCGTCTTCTGCTTG
AAAAAAAAAAAAACGAGTAAACCGGAGGACGCCTAGAGCTTCGACAAAAGAAACAAACAGAACATACTCAGAAATCACAT
GTAAGTCAAGAGCCTTGTAGTCCGTCCGCTCCTTTAGGTCCAGTATCGCCTTTAGGTCCAGCAGGTCCAACAGGTCTTG
CAAACCTTGTGACCAGTTTCCCC
>SRR2298382.111826 111826 length=502
GTAGGGCAAAAAGGCGACGCTGGACCAAAAAGGAGCGGATGGGTTGCCCGGTGAGAGAGGCGAACGAGGCGCAGATGGTGCA
AAGGGCGATAAAAAGGCGATACTGGCGAACGTGGACCGATAGGCCACAAAGGCCCTCAAGGCTTGACTGGCCACAAAGGGCA
ACGTGGGGAAACTGGTCAACAAGGTTTGCAAGGACCTGTTGGACCTGCTGGACCTAAAAGGCGATACTGGACCTAAAAGGAG
CGGACGGACTAGGGCCTTGTAGTCCGTCCGCTCCTTTAGGTCCAGTATCGCCTTTAGGTCCAGCAGGTCCAACAGGTCTT
TGCAAACCTTGTGACCAGTTTCCCCACGTTGCCCTTGTGGGCCAGTCAAGCCTTGAGGGCCTTGTGGGCTATCGGTCC
ACGTTCCGACGATCGCCTTTATCGCCTTTGCACCATCTGCGCCTCGTTCGCTCTCTCACCGGGCAACCCATCCGCTC
CTTTTGGTCCAGCGTCGCCTTT
>SRR2298382.108909 108909 length=194
TGAAGTGGCCACAAGGGCAACGTGGGGAAACTGGTCAACAAGGTTTGCAAGGACCTGTTGGACCTGCTGGACCTAAAAGGC
GATACTGGACCTAAAAGGCCCTTTAGGTCCAGTATCGCCTTTAGGTCCAGCAGGTCCAACAGGTCTTTGCAAACCTTGTGTA
CCAGTTTCCCCACGTTGCCCTTGTGGGCCAGTCA
```



>SRR2298382.106152 106152 length=342  
CTTTTGCGGGATTCTACGCCGTACGGCCTTGCTCGCCTTGCAAACCTTGAGGGCCAATAGGGCCTTGTAGTCCGTCCG  
CTCCTTTAGGTCCAGTATCGCCTTTAGGTCCAGCAGGTCCAACAGGTCCCTTGCAAACCTTGTGTGACCAGTTTCCCCACGT  
TGCCCTTGTGGCCACAAGGGCAACGTGGGGAAACTGGTCAACAAGGTTTGAAGGACCTGTTGGACCTGCTGGACCTAAA  
GGCGATACTGGACCTAAAGGAGCGGACGGACTACAAGGCCATATTGGCCCTCAAGGTTTGAAGGCGAGCAAGGCCGTGA  
CGCGTAGGAATCCCGCAAAAAG

>SRR2298382.104887 104887 length=164  
CTTGTAGTCCGTCCGCTCCTTTAGGTCCAGTATCGCCTTTAGGTCCAGCAGGTCCAACAGGTCCCTTGCAAACCTTGTGTA  
CCGGTCAACAAGGTTTGAAGGACCTGTTGGACCTGCTGGACCTAAAGGCGATACTGGACCTAAAGGAGCGGACGGACTA  
CAAG

>SRR2298382.99979 99979 length=252  
CTTGTAGTCCGTCCGCTCCTTTAGGTCCAGTATCGCCTTTAGGTCCAGCAGGTCCAACAGGTCCCTTGCAAACCTTGTGTA  
CCAGTTTCCCCACGTTGCCCTTGTGGGCCAGTCAAGCCTTGAGGGCGCCCTCAAGGCTTGACTGGCCACAAGGGCAACG  
TGGGGAAACTGGTCAACAAGGTTTGAAGGACCTGTTGGACCTGCTGGACCTAAAGGCGATACTGGACCTAAAGGAGCGG  
ACGGACTACAAG

>SRR2298382.87062 87062 length=501  
GGATTGGACGGCTTGCCGGGCGCAAAAGGCGACGCTGGACCAAAAGGAGCGGATGGGTTGCCCGGTGAGAGAGGGCAACG  
AGGCGCAGATGGTGC AAAGGGCGATAAAAGGCGATACTGGCGAACGTTGGACCGATAGGCCCAACAAGGCCCTCAAGGCTTGA  
CTGGCCCAACAAGGGCAACGTGGGGAAACTGGTCAACAAGGTTTGAAGGACCTGTTGGACCTGCTGGACCTAAAGGCGAT  
ACTGGACCTAATTGTAGTCCGTCCGCTCCTTTAGGTCCAGTATCGCCTTTAGGTCCAGCAGGTCCAACAGGTCCCTTGCAA  
ACCTTGTGACCAGTTTCCCCACGTTGCCCTTGTGGGCCAGTCAAGCCTTGAGGGCCTTGTGGGCCTATCGGTCCACGTT  
CGCCAGTATCGCCTTTATCGCCTTTGCACCATCTGCGCCTCGTTGCGCTCTCTCACCAGGGCAACCCATCCGCTCCTTTT  
GGTCCAGCGTCGCTTTTTCG

>SRR2298382.83290 83290 length=502  
GTGGCTGCTGTGTCACGTAGGTTGTACTACTGGTGCAGTAACTTTCCGTTAGGCATACCAGTGCCTGGATTTCATA  
CTCGTTGGCTTGTCCAGCTGGCGGCTTGTAGCTTGTGACTTGGTAGCGTTACACTTCCCCCACCCTGACAGCGTGA  
GTGTGTTTCTGATAAGGTCAGCTTTTTGCGGGATTCTACGCCGTACGGCCTTGCTCGCCTTGCAAACCTTGAGGGCCA  
ATAGGGCCTTGGGGCCACAAGGCCCTCAAGGCTTGACTGGCCCAACAAGGGCAACGTGGGGAAACTGGTCAACAAGGTTTGA  
CAAGGACCTGTTGGACCTGCTGGACCTAAAGGCGATACTGGACCTAAAGGAGCGGACGGACTACAAGGCCCTATTGGCCC  
TCAAGGTTTGAAGGCGAGCAAGGCCGTGACGGCGTAGGAATCCCGCAAAAAGCTGACCTTATCAGGAAAACAACTCACGC  
TGTGACAGCGGGGGGGGAAGGGG

>SRR2298382.81661 81661 length=378  
CTTGTAGTCCGTCCGCTCCTTTAGGTCCAGTATCGCCTTTAGGTCCAGCAGGTCCAACAGGTCCCTTGCAAACCTTGTGTA  
CCAGTTTCCCCACGTTGCCCTTGTGGGCCAGTCAAGCCTTGAGGGCCTTGTGGGCCTATCGGTCCACGTTCCGACGATC  
GCCTTTATCGCCTTTGCACCATCTGCGCGCGCAGATGGTGCAAAGGGCGATAAAAGGCGATACTGGCGAACGTTGGACCGA  
TAGGCCCAACAAGGCCCTCAAGGCTTGACTGGCCCAACAAGGGCAACGTGGGGAAACTGGTCAACAAGGTTTGAAGGACCT  
GTTGGACCTGCTGGACCTAAAGGCGATACTGGACCTAAAGGAGCGGACGGACTACAAG

>SRR2298382.81567 81567 length=266  
CCTTTAGGTCCAGTATCGCCTTTAGGTCCAGCAGGTCCAACAGGTCCCTTGCAAACCTTGTGTGACCAGTTTCCCCACGTTG  
CCCTTGTGGCCAGTCAAGCCTTGAGGGCCTTGTGGGCCTATCGGTCCACGTTAACGTTGACCGATAGGCCCAACAAGGCC  
CTCAAGGCTTGACTGGCCCAACAAGGGCAACGTGGGGAAACTGGTCAACAAGGTTTGAAGGACCTGTTGGACCTGCTGGA  
CCTAAAGGCGATACTGGACCTAAAGG

>SRR2298382.78124 78124 length=400  
GGCCCTTGTAGTCCGTCCGCTCCTTTAGGTCCAGTATCGCCTTTAGGTCCAGCAGGTCCAACAGGTCCCTTGCAAACCTTG  
TTGACCAGTTTCCCCACGTTGCCCTTGTGGGCCAGTCAAGCCTTGAGGGCCTTGTGGGCCTATCGGTCCACGTTCCGCCAG  
TATCGCCTTTATCGCCTTTGCACCATCTGCGCCTCGTTGGAACGAGGCGCAGATGGTGCAAAGGGCGATAAAAGGCGATA  
CTGGCGAACGTTGGACCGATAGGCCCAACAAGGCCCTCAAGGCTTGACTGGCCCAACAAGGGCAACGTGGGGAAACTGGTCAA  
CAAGGTTTGAAGGACCTGTTGGACCTGCTGGACCTAAAGGCGATACTGGACCTAAAGGAGCGGACGGACTACAAGGCC  
>SRR2298382.77844 77844 length=360  
GTCACGGCCTTGCTCGCCTTGCAAACCTTGAGGGCCAATAGGGCCTTGTAGTCCGTCCGCTCCTTTAGGTCCAGTATCGC  
CTTTAGGTCCAGCAGGTCCAACAGGTCCCTTGCAAACCTTGTGTGACCAGTTTCCCCACGTTGCCCTTGTGGGCCAGTCAAG  
CCTTGAGGGCCTTGTGGGCCGCGCCACAAGGCCCTCAAGGCTTGACTGGCCCAACAAGGGCAACGTGGGGAAACTGGTCAA  
CAAGGTTTGAAGGACCTGTTGGACCTGCTGGACCTAAAGGCGATACTGGACCTAAAGGAGCGGACGGACTACAAGGCC  
TATTGGCCCTCAAGGTTTGAAGGCGAGCAAGGCCGTGAC

>SRR2298382.71542 71542 length=356  
GTCTGACAGCGTGAGTGTGTTTCTGATAAGGTCAGCTTTTTCGGGATTCTACGCCGTACGGCCTTGCTCGCCTTGCA  
AACCTTGAGGGCCAATAGGGCCTTGTAGTCCCTTCCGCTCCTTTAGGTCCAGTATCGCCTTTAGGTCCAGCAGGTCCAACA  
GGTCCCTTGCAAACCTTGTACAAGGTTTGAAGGACCTGTTGGACCTGCTGGACCTAAAGGCGATACTGGACCTAAAGGAG  
CGGAAGGACTACAAGGCCCTATTGGCCCTCAAGGTTTGAAGGCGAGCAAGGCCGTGACGGCGTAGGAATCCCGCAAAAAG

CTGACCTTATCAGGAAACACACTCACGCTGTCAGAC  
>SRR2298382.70519 70519 length=246  
AGTATCGCCTTTAGGTCCAGCAGGTCCAACAGGTCCCTTGCAAACCTTGTGACCAGTTTCCCCACGTTGCCCTTGTGGGC  
CAGTCAAGCCTTGAGGGCCTTGTGGGCCTATCGGTCCACGTTTGAACGTGGACCGATAGGCCACAAGGCCCTCAAGGCT  
TGACTGGCCACAAGGGCAACGTGGGGAACTGGTCAACAAGGTTTGAAGGACCTGTTGGACCTGCTGGACCTAAAGGC  
GATACT  
>SRR2298382.69009 69009 length=420  
GCACTGGTACGCGGTGGTCGAGTTTGCCAGTGGCCTGTCACTGATTGGCCTTGCTCGCCTTGCAAACCTTGAGGGCCAA  
TAGGGCCTTGTAGTCCGTCGCTCCTTTAGGTCCAGTATCGCCTTTAGGTCCAGCAGGTCCAACAGGTCCCTTGCAAACCT  
TGTGACCAGTTTCCCCACGTTGCCATTGTGGGCCAGTCAAGCCTTGAGGCCTCAAGGCTTGACTGGCCACAATGGCAA  
CGTGGGGAACTGGTCAACAAGGTTTGAAGGACCTGTTGGACCTGCTGGACCTAAAGGCGATACTGGACCTAAAGGAGC  
GGACGGACTACAAGGCCCTATTGGCCCTCAAGGTTTGAAGGCGAGCAAGGCCAATCAGTGACAGGCCACTGGCAAACCT  
GACCACGCGCTACCAGTGC  
>SRR2298382.65644 65644 length=501  
GGTTTGTAGCTTGTGACTTGGTAGCGTTACACTTCCCCACCGTCTGACAGCGTGAGTGTGTTTCTGATAAGGTCAGC  
TTTTGCGGGATTCTACGCCGTCACGGCCTTGTCTGCCTTGCAAACCTTGAGGGCCAATAGGGCCTTGTAGTCCGTCGCG  
TCTTTAGGTCCAGTATCGCCTTTAGGTCCAGCAGGTCCAACAGGACCTTGCAAACCTTGTGACCAGATTCCCCACGCT  
GCCCTTGTGGGAACGTGGACCGATAGGCCACAAGGCCCTCAAGGCTTGACTGGCCACAAGGGCAACGTGGGGAACTG  
GTCAACAAGGTTTGAAGGACCTGTTGGACCTGCTGGACCTAAAGGCGATACTGGACCTAAAGGAGCGGACGGACTACAA  
GGCCCTATTGGCCCTCAAGGTTTGAAGGCGAGCAAGGCCGCGACGGCGTAGGAATCACGCAAAAAGCTGACCTAATCAGG  
AAACACACACACGCTGTCAGA  
>SRR2298382.63389 63389 length=501  
CACGTAGGTTGTACCTACTGGTGCAGTAACCTTTCGTTAGGCATACCAGTGCCGTGGATTTTACTACTCGTTGGCTTGT  
TAGCTGGCGCGTTTGTAGCTTGTGACTTGGTAGCGTTACACTTCCCCACCGTCTGACAGCGTGAGTGTGTTTCTGAT  
AAGGTCAGTTTGTGCGTCTAACTTTAGATATGACGCGCTCAATTTTGAACGATTTCAAGTGTCTCCAACAGATATCC  
CCAGTCAAAAAGATGGGTTGCCCGGTGAGAGAGGCGAACGAGGCGCAGATGGTGCAAAAGGGCGATAAAGGCGATACTGGCG  
AACGTGGACCGATAGGCCACAAGGCCCTCAAGGCTTGACTGGCCACAAGGGCAACGTGGGGAACTGGTCAACAAGGTT  
TTGCAAGGACCTGTTGGACCTGCTGGACCTAAAGGCGATACTGGACCTAAAGGAGCGGACGGACTACAAGGCCCTAATGG  
CCCTGAAGGATTGGAAGGCGG  
>SRR2298382.58758 58758 length=346  
TGCGCAGATGGTGCAAAGGGCGATAAAGGCGATACTGGCGAACGTGGACCGATAGGCCACAAGGCCCTCAAGGCTTGAC  
TGGCCACAAGGGCAACGTGGGGAACTGGTCAACAAGGTTTGTAAAGGCCCTGTTGGACCTGCTGGACCTAAAGGCGAAA  
CTGGAATAAAGGCCCTTAGGTCCAGTATCGCCTTTAGGTCCAGCAGGTCCAACAGGTCCCTTGCAAACCTTGTGACCAG  
TTTCCCCACGTTGCCCTTGTGGGCCAGTCAAGCCTTGAGGGCCTTGTGGGCTATCGGTCCACGTTTCGCCAGTATCGCCT  
TTATCGCCCTTTGCACCATCTGCGCC  
>SRR2298382.58475 58475 length=501  
GACCGATAGGCCACAAGGCCCTCAAGGCTTGACTGGCCACAAGGGCAACGTGGGGAACTGGTCAACAAGGTTTGC  
GGACCTGTTGGACCTGCTGGACCTAAAGGCGATACTGGACCTAAAGGAGCGGACGGACTACAAGGCCCTATTGGCCCTCA  
AGGTTTGAAGGCGAGCAAGGCCGTGACGGCGTAGGAATCCCGCAAAAAGCTGACCTTATCAGGAAACACACTCACGCTGT  
CAGACGGTGGGCCACCCTGCTGACAGCGTGAGTGTGTTTCTGATAAGGTCAGCTTTTTCGCGGATTCTACGCCGTCAG  
GCCTTGTCTGCCTTGCAAACCTTGAGGGCCAATAGGGCCTTGTAGTCCGTCGCTCCTTTAGGTCCAGTATCGCCTTTAG  
GTCCAGCAGGTCCAACAGGTCCCTTGCAAACCTTGTGACCAGTTTCCCCACGTTGCCCTTGTGGGCCAGTCAAGCCTTGA  
GGCCTTGTGGGCCTATCGGT  
>SRR2298382.56894 56894 length=376  
CGATAAAGGCGATACTGGCGAACGTGGACCGATAGGCCACAAGGCCCTCAAGGCTTGACTGGCCACAAGGGCAACGTG  
GGGAACTGGTCAACAAGGTTTGAAGGACCTGTTGGACCTGCTGGACCTAAAGGCGATACTGGACCTAAAGGAGCGGAC  
GGACTACAAGGCCCTATTGGCCAGAACGTTCTGGGCCAATAGGGCCTTGTAGTCCGTCGCTCCTTTAGGTCCAGTATC  
GCCTTTAGGTCCAGCAGGTCCAACAGGTCCCTTGCAAACCTTGTGACCAGTTTCCCCACGTTGCCCTTGTGGGCCAGTCA  
AGCCTTGAGGGCCTTGTGGGCCTATCGGTCCACGTTTCGCCAGTATCGCCTTTATCG  
>SRR2298382.52746 52746 length=236  
CAAGGGCAACGTGGGGAACTGGTCAACAAGGTTTGAAGGACCTGTTGGACCTGCTGGACCTAAAGGCGATACTGGACC  
TAAAGGAGCGGACGGACTACAAGGCCCTATTGGCCCTCGAGGGCCAATAGGGCCTTGTAGTCCGTCGCTCCTTTAGGTC  
CAGTATCGCCTTTAGGTCCAGCAGGTCCAACAGGTCCCTTGCAAACCTTGTGACCAGTTTCCCCACGTTGCCCTTGA  
>SRR2298382.47829 47829 length=192  
CCTTTAGGTCCAGTATCGCCTTTAGGTCCAGCAGGTCCAACAGGTCCCTTGCAAACCTTGTGACCAGTTTCCCCACGTTG  
CCCTTGTGGGCCAGTCGACTGGCCACAAGGGCAACGTGGGGAACTGGTCAACAAGGTTTGAAGGACCTGTTGGACCT  
GCTGGACCTAAAGGCGATACTGGACCTAAAGG  
>SRR2298382.47185 47185 length=501  
CAAGGGCAACGTGGGGAACTGGTCAACAAGGTTTGAAGGACCTGTTGGACCTGCTGGACCTAAAGGCGATACTGGACC

TAAAGGAGCGGACGGACTACAAGGCCCTATTGGCCCTCAAGGTTTGC AAGGCGAGCAAGGCCGTGACGGCGTAGGAATCC  
CGCAAAAGCTGACCTTATCAGGAAAACACTCACGCTGTCAGACGGTGGGGGAAAGTGTAAACGCTACCAAGTCAACAAGCT  
ACAAAACGCGCCGCATTAGTGGCTGCTGTGTCCACGTAGGTTGTACCTACTGGTGCAGTAACCTTTCCGTTAGGCATAACC  
AGTGCCGTGGATTTTCATACTCGTTGGCTTGTCCAGCTGGCGCGTTTGTAGCTTGTGACTTGGTAGCGTTACACTTCCCC  
CACCGTCTGACAGCGTGAGTGTGTTTCCCTGATAAGGTCAGCTTTTGC GGGATTCCACGCCGTACAGGCCTTGCTCGCCT  
TGCAAACCTTGAGGGCAATA

>SRR2298382.37617 37617 length=501

GTGCAAAGGGCGATAAAGGCGATACTGGCGAACATGGACCGATAGGCC CACAAGGCCCTCAAGGCTTGACTGGCCACAA  
GGCAACGTGGGGAAACTGGTCAACAAGGTTTGC AAGGACCTGTTGGACCTGCTGGACCTAAAGGCGATACTGGACCTAA  
AGGAGCGGACGGACTACAAGGCCCTATTGGCCCTCAAGGTTTGC AAGGCGAGCAAGGCCGTGACGGCGTAGGAATCCCCG  
AAAAGCTGACCCGTCTGACAGCGTGAGTGTGTTTCCCTGATAAGGTCAGCTTTTGC GGGATTCCACGCCGTACAGGCCTT  
GCTCGCCTTGCAAACCTTGAGGGCAATAGGGCCTTGTAGTCCGTC CGCTCCTTTAGGTCCAGTATCGCCTTTAGGTCCA  
GCAGGTCCAACAGGTCCTTGCAAACCTTGTGACCAGTTTCCCCACGTTGCCCTTGTGGGCCAGTCAAGCCTTGAGGGCC  
TTGTGGGCTATCGGTCCATG

>SRR2298382.35774 35774 length=500

CAAGGGCAACGTGGGAAACTGGTCAACAAGGTTTGC AAGGACCTGTTGGACCTGCTGGACCTAAAGGCGATACTGGACC  
TAAAGGAGCGGACGGACTACAAGGCCCTATTGGCCCTCAAGGTTTGC AAGGCGAGCAAGGCCGTGACGGCGTAGGAATCC  
CGCAAAAGCTGACCTTATCAGGAAAACACTCACGCTGTCAGACGGTGGGGGAAAGTGTAAACGCTACCAAGTCAACAAGCT  
ACAAACTCACTTTGTAGCTTGTGACTTGGTAGCGTTACACTTCCCCACCGTCTGACAGCGTGAGTGTGTTTCCCTGATA  
AGGTCAGCTTTTGC GGGATTCCACGCCGTACGGCCTTGCTCGCCTTGCAAACCTTGATGGCCAATAGTGCCTTGTAGT  
CCGTCCGCTCCTTTAGGTCCAGTATCCCCTTTAGGTACCGCCTGTCCAACATGTCCCTGCAAACCTTGTATAACACATTC  
ACAACGGCGCCAGCCCGG

>SRR2298382.26484 26484 length=170

TTTAGGTCCAGTATCGCCTTTAGGTCCAGCAGGTCCAACAGGTCCTTGCAAACCTTGTGACCAGTTTCCCCACGTTGCC  
CTTGTACAAGGGCAACGTGGGGAAACTGGTCAACAAGGTTTGC AAGGACCTGTTGGACCTGCTGGACCTAAAGGCGATA  
TGACCTAAA

>SRR2298382.25595 25595 length=500

CAAAAGGCGACGCTGGACCAAAAGGAGCGGATGGGTTGCCCGGAGAGGGAGGGCGAACGAGGGCGCAGATGGTGC AAAGGGC  
GATAAAGGCGATACTGGCGAACGTGGACCGATAGGCC CACAAGGCCCTCAAGGCTTGACTGGCC CACAAGGGCAACGTGG  
GGAAACTGGTCAACAAGGATTTGCAAGGACCTGTTGGACCTGCTGGACCTAAAGGCGATACTGGACCTAAAGGAACGGACG  
GACTACAAGGCCTTGCAAACCTTGAGGGCCAATAGGGCCTTGTAGTCCGTC CGCTCCTTTAGGTCCAGTATCGCCTTTAG  
GTCCAGCAGGTCCAACAGGTCCTTGCAAACCTTGTGACCAGTTTCCCCACGTTGCCCTTGTGGGCCAGTCAAGCCTTGA  
GGCCTTGTGGGCTATCGGTCCACGTTCCAGTATCGCCTTTATCGCCTTTGC ACCATCTGCGCCTCGTTCGCTCC  
CTCACGGGCAACCCATCCG

>SRR2298382.20988 20988 length=501

GTTCCGGTTATTGGCGAACGTGGACCGATAGGCC CACAAGGCCCTCAAGGCTTGACTGGCC CACAAGGGCAACGTGGGGA  
AACTGGTCAAGGTTTGC AAGGACCTGTTGGACCTGCTGGACCTAAAGGCGATACTGGACCTAAAGGAGCGGACGGACTAC  
AAGGCCCTATTGGCCCTCAAGGGTTGC AAGGCGAGCAAGGCCGTGACGGCGTAGGAATCCCCGAAAAGCTGACCTTATCA  
GGAAAACACTTTGTAGCTTGTGACTTGGTAGCGTTACACTTCCCCACCGTCTGACAGCGTGAGTGTGTTTCCCTGATA  
AGGTCAGCTTTTGC GGGATTCCACGCCGTACGGCCTTGCTCGCCTTGCAACCTTGAGGGCCAATAGGGCCTTGTAGT  
CCGTCCGCTCCTTTAGGTCCAGTATCGCCTTTAGGTCCAGCAGGTCCAACAGGTCCTTGCAAACCTTGACCAGTTTCCCC  
ACGACGCCCTTGTGGGCCAGG

>SRR2298382.18993 18993 length=498

CAAGGCCCTCAAGGCTTGACTGGCC CACAAGGGCAACGTGGGGAAACTGGTCAACAAGGTTTGC AAGGACCTGTTGGACC  
TGCTGGACCTAAAGGCGATACTGGACCTAAAGGAGCGGACGGACTACAAGGCCCTATTGGCCCTCAAGGTTTGC AAGGCG  
AGCAAAGGCCGTGACGGCGTAGGAATCCCGCAAAAGCTGACCTTATCAGGAAAACACTCACGCTGTCAGACGGTGGGGGA  
AGGGTAATTACACTTCCCCACCGTCTGACAGCGTGAGTGTGTTTCCCTGATAAGGTCAGCTTTTGC GGGATTCCACGCC  
GTCACGGCCTTGCTCGCCTTGCAAACCTTGAGGGCCAATAGGGCCTTGTAGTCCGTC CGCTCCTTTAGGTCCAGTATCGC  
CTTTAGGTCCAGCAGGTCCAACAGGTCCTTGCAAACCTTGTGACCAGTTTCCCCACGTTGCCCTTGTGGGCCAGTCAAG  
CCTTGAGGGCCTTGCCG

>SRR2298382.18914 18914 length=468

GACTTGGTAGCGTTACACTTCCCCACCGTCTGACAGCGTGAGTGTGTTTCCCTGATAAGGTCAGCTTTTGC GGGATTCCCT  
ACGCCGTACGGCCTTGCTCGCCTTGCAAACCTTGAGGGCCAATAGGGCCTTGTAGTCCGTC CGCTCCTTTAGGTCCAGT  
ATCGCCTTTAGGTCCAGCAGGTCCAACAGGTCCTTGCAAACCTTGTGACCAGTTTCCCCACGTTGCCCTTGTGCACAAG  
GGCAACGTGGGGAAACTGGTCAACAAGGTTTGC AAGGACCTGTTGGACCTGCTGGACCTAAAGGCGATACTGGACCTAAA  
GGAGCGGACGGACTACAAGGCCCTATTGGCCCTCAAGGTTTGC AAGGCGAGCAAGGCCGTGACGGCGTAGGAATCCCCGCA  
AAAAGCTGACCTTATCAGGAAAACACTCACGCTGTCAGACGGTGGGGGAAAGTGTAAACGCTACCAAGTC

>SRR2298382.6569 6569 length=366

CACAAGGGCAACGTGGGGAAACTGGTCAACAAGGTTTGC AAGGACCTGTTGGACCTGCTGGACCTAAAGGCGATACTGGA

CCTAAAGGAGCGGACGGACTACAAGGCCCTATTGGCCCCAAGGTTTGC AAGGCGAGCAAGGCCGTGACGGCGTAGGAAT  
CCC GCAAAAAGCTGACCTTATCAGCTGATAAGGTCAGCTTTTTCGGGATTCTACGCCGTACGGCCTTGCTCGCCTTGCA  
AACCTTGGGGGCCAATAGGGCCTTGTAGTCCGTCCGCTCCTTTAGGTCCAGTATCGCCTTTAGGTCCAGCAGGTCCAACA  
GGTCTTGC AAACCTTGTGACCAGTTTCCCCACGTTGCCCTTGTG

>SRR2298382.1706 1706 length=492

GGCAACGTGGGGAAACTGGTCAACAAGGTTTGC AAGGACCTGTTGGACCTGCTGGACCTAAAGGCGATACTGGACCTAAA  
GGAGCGGACGGACTACAAGGCCCTATTGGCCCTCAAGGTTTGC AAGGCGAGCAAGGCCGAGACGGCGTAGGAATCCCGCA  
AAAGCTGACCTTATCAGGAAACACACTCACGCTGTCAGACGGTGGGGGAAGTGTAAACGCTACCAAGTCAACAAGCTACAA  
ACGCACGTGCGTTTGTAGCTTGTGACTTGGTAGCGTTACACTTCCCCCACCCTGCTGACAGCGTGAGTGTGTTTCTGAT  
AAGGTCAGCTTTTTCGGGATTCTACGCCGTCTCGGCCTTGCTCGCCTTGCAAACCTTGAGGGCCAATAGGGCCTTGTAG  
TCCGTCCGCTCCTTTAGGTCCAGTATCGCCTTTAGGTCCAGCAGGTCCAACAGGTCTTGC AAACCTTGTGACCAGTTT  
CCCCACGTTGCC

>SRR2298290.411674 411674 length=502

GTATCGCCTTTAGGTCCAGCAGGTCCAACAGGTCTTGC AAACCTTGTGACCAGTTTCCCCGAGCCCACGAGACTCCTG  
AGCATCTCGTATGCCGTCTTCTGCTTGA AAAAAAAAAAATCTGCTAGA AAAAAAAAAACAAGACGGTAGCAATAACCTGAA  
TAAGCACCGATCATATGGAGATAGGAATAAGAGAATTCATTCTAGCAAACAGTAAACAAC TACTTTGTAACGAGAAAGA  
ACGACAGACGGGGCCCGCCTGAAGTTGGGGTTCGCAATGGCGGAAACTAGATGCGCCAGGAGCGGTCCGGCCGGCTGTG  
ACTCCCATCGGACGCTGCC TACGAAAAACATATCCCTCATCCC GCGAGCGGTGACGAATTAATCAGACGAGTGCAGGAT  
AATTTAAACACATGAAACTAACATTTGACAATAATCACTTATGAATAACATGAACTCCAAGATAAAGAAGACAACCTACAC  
GATATTAGATGTAGACTATGAA

>SRR2298578.40400 40400 length=500

ATTATTTCTAAATTTCAAGTCCATGAATGTGGATATCTTCACTGTTTCTCACACTAAGGTAGACAACCTATTTGGAAGA  
GCTTGGTTTTACCAGGAACACACTTTCACCGATGAAGGGCAGTGGAGAGTTAGCTTAGAGTTCCCGAAACAAGGCCATGG  
TTCGCTTTCATTGTTATTCGTTACTTTACAGGTGAACTAAATATTCATGTTCTGTTCTTAGCTGAAAAGGGATTTCTTA  
GAGTAGAAGGGCCACACCTATGACACATCAGCAAAACAGGTTAACTTCTGTCATCCAATGGCGTCATCA AATCCCAG  
CCGGAGAACA AATGACATTATCTGACCCCTACTACTCTAAGAAATCCCTTTTCAGCTAGGAACAGAACATGAATATTTAG  
TTCACCTGTAAAGTAAGCGAATAACAATGAAAGCGAACCATGGCCCTGTTTTCGGGAACTCTAAGCAA AACTCTCCACTGCC  
CTTCATCGGTGAAAGTGGGC

>SRR2298573.122301 122301 length=500

GCCATCTCTAGTAAAGTTTGTGAGACGCTCTGGTGACGTGTGGGAACTTATTTGGAAACAACATTTTGTGTA AAGCATCCT  
ATTGCCAGCGGAACAACACCTGGTAAACAGGTGCCTCTGGGGCCAAAAGCCAAGGTTTAAACA AACCCTTTAGGATTTGGTTC  
TAAACCTGAGATGTTGTGGAAGATACTTAGTACCTACCGATCTGGTAGTAGTGCAAACACTAGTTGTAAGGCCACGAAG  
GATGCCAGAGGTACCTTCTGGGCATCCTTCTGTTGGCCTTACAAC TAGTGTGTTGCACTACTACCAGATCGGTAGGTA  
AGTATCTTCCACAACATCTCAGGTTTAGAACCAATCTTAAAGGTTTGT TAAACCTTTGGCTTTTGGCCCCAGAGGCACCT  
GTTACCAGGTGTTGTTCCGCTGGCAATAGGATGCTTTACAGCAA AATGTTGTTTCCAATAAGTTCCACACGTCACCAGA  
CGTCCCCAAA AACTTACTAAG

>SRR2298573.862030 862030 length=500

GTTTGTGAGACGCTCTGGTGACGTGTGGGAACTTATTTGGAAACAACATTTTGTGTA AAGCATCCTATTGCCAGCGGAACA  
ACACCTGGTAAACAGGTGCCTCTGGGGCCAAAAGCCAAGGTTTAAACA AACCCTTTAGGATTTGGTTC TAAACCTGAGATGTT  
GTGGAAGATACTTAGTACCTACCGATCTGGTAGTAGTGCAAACACTAGTTGTAAGGCCACGAAGGATGCCAGAAGGTA  
CCCATAGGTAAGATAGAGGTACCTGGCCCCAGATCAGATCCATAGTGTGCTTGT TACCTATGGGTACCTTCTGGGCATC  
CTTCGTGGGCCTTACAAC TAGTGTGTTGCACTACTACCAGATCGGTAGGTA AAGTATCTTCCACAACATCTCAGGTTTA  
GAACCAATCTTAAAGGTTTGT TAAACCTTTGGCTTTTGGCCCCAGAGGCACCTGTTACCCGGGGTTGTTCCCCGGGCAAT  
AGGAGGCTTTAACGCA AAG

>SRR2298573.814921 814921 length=500

CCAGATCACCAAGATAGAGGTACCTGGCCCCAGATCAGATCCATAGTGTGCTGTTACCTATGGGTACCTTCTGGGCAT  
CCTTCGTGGGCCTTACAAC TAGTGTGTTGCACTACTACCAGATCGGTAGGTA AAGTATCTTCCACAACATCTCAGGTTT  
AGAACCAATCTTAAAGGTTTGT TAAACCTTTGGCTTTTGGCCCCAGAGGCACCTGTTACCAGGTGTTGTTCCGCTGGCAA  
TAGGATGCTTTACCATGCTTGTGGACCTTATGCTCACACAGCCATCCTCTAGTAAAGTTTGTGAGACGCTCTGGTGACGTGT  
GGGAACTTATTTGGAAACAACATTTTGTGTA AAGCATCCTATTGCCAGCGGAACAACACCTGGTAAACAGGTGCCTCTGGG  
GCCAAAACCAAGGTTTAAACA AACCCTTTAGGATTTGGTTC TAAACCTGAGATGTTGTAAGATACTTAGTAACTACCGA  
TCTGGGAGGAGTGCAAACCC

>SRR2298573.595924 595924 length=500

TTTTTAACCAGATCACCAAGATAGAGGTACCTGGCCCCAGATCAGATCCATAGTGTGCTGTTACCTATGGGTACCTTC  
TGGGCATCCTTCGTGGGCCTTACAAC TAGTGTGTTGCACTACTACCAGATCGGTAGGTA AAGTATCTTCCACAACATCT  
CAGGTTTAGA AACAATCCTTAAAGGTTTGT TAAACCTTTGGCTTTTGGCCCCAGAGGCACCTGTTACCAGGTGTTGTTCCG  
CTGGCAATAGGTCTGGTGACGTGTGGGAACTTATTTGGAAACAACATTTTGTGTA AAGCATCCTATTGCCAGCGGAACA  
CACCTGGTAAACAGGTGCCTCTGGGGCCAAAAGCCAAGGTTTAAACA AACCCTTTAGGATTTGGTTC TAAACCTGAGATGTTG  
TGGAAGATACTTAGTACCTACCGATCTGGTAGTAGTGCAAACACTAGTTGTAAGGCCACGAAGGATGCCAGAAGGAAC

CCATAGGGAACAAGCGACAC  
>SRR2298573.482382 482382 length=500  
CTTCTGGGCATCCTTCGTGGGCCCTTACAACCTAGTGTGTTGCACTACTACCAGATCGGTAGGTACTAAGTATCTTCCACAAC  
ATCTCAGGTTTAGAACCAATCCTAAAAGGGTTTGTAAACCTTGGCTTTTGGCCCCAGAGGCACCTGTTACCAGGTGTTGT  
TCCGCTGGCAATAGGATGCTTTACAGCAAAATGTTGTTTCCAATAAGTTCCACACGTCACCAGACGTCTCACAACTTA  
CTAGAGGATGGTGAGATAACCATGCTTGTGGACCTTATGCTCACACAGCCATCCTCTAGTAAGTTTGTGAGACGTCTGGTG  
ACGTGTGGGAACCTTATTGGAACAACATTTTGTCTGTAAGCATCCTATTGCCAGCGGAACAACACCTGGTAACAGGTGCC  
TCTGGGGCCAAAAGCCAAGGTTTAAACAAACCTTTAGGAATGGTCCATAAACCTGAGATGTAGTGAAGAACCCTTAGAACC  
TACCGATTTGGTATGAGGGC  
>SRR2298573.51148 51148 length=500  
ATCCTCTAGTAAGTTTGTGAGACGTCTGGTGACGTGTGGGAACTTATTGGAAAACAACATTTTGTCTGTAAGCATCCTATT  
GCCAGCGGAACAACACCTGGTAACAGGTGCCCTCGGGGCCAAAAGCCAAGGTTTAAACAAACCTTTAGGATTTGGTTCTAA  
ACCTGAGATGTTGTGGAAGATACTTAGTACCTACCGATCTGGTAGTAGTGCAAACACTAGTTGTAAGGCCACGAAGGAT  
GCCGAGAAGGGTACCTGGCCCCAGATCAGATCCATAGTGTGCTTGTACCTATGGGTACCTTCTGGGCATCCTTCGTGG  
GCCTTACAACCTAGTGTGTTGCACTACTACCAGATCGGTAGGTACTAAGTATCTTCCACAACATCTCAGGTTTAGAACCAAT  
CCTAAAAGGGTTTGTAAACCTTGGCTTTTGGCCCCAGAGGCACCTGTTACCAGGTGTTGGTCCGCTGGCAAAAGGAGGCT  
TTACAGCAAAATGTTGTTTC  
>SRR2298546.826318 826318 length=501  
GTGCATTTGGTGGTGTATGAACCCAAACCTGTTGTGACATATGACTCAAAGTTAGAATTTGGAGCGTTTACCAATTTACCA  
CATGTGTTGATGAATTTGGCTGAGACCACACAGGCTGATTTATGTATCCCTATGTTGCTGACACAACTATGTTAAAAAC  
AGATTCGTCAGACTTAGGGCAACTAAAAGTCTATGTTTGGACACCTTTATCCATACTTCAGGTTCTGCTACACAAGTTG  
ATGTTACCATATTGTAAGAATTTTCTTAAGATTTTGTCTCCGCTTGGTGCATTTGTCATAAAATACCAACGCTCTTGACCGA  
ATACCCGAGGATTTTGGAAAGTCCAATTTGCAATAAGCTACCCAATATGGTAACATCAACTTGTGTAGCAGAACCTGAAGGT  
ATGGATAAAGGTGTCCAACATAGACTTTTAGTTGCCCTAAGTCTGACGAATCTGTTTAAACATAGTTTGTGTGACGAAC  
ATAGGGGATACATAAATCAGC  
>SRR2298573.820409 820409 length=500  
CACCAAGATAGAGGTACCTGGCCCCAGATCAGATCCATAGTGTGCTGCTTGTACCTATGGGTACCTTCTGGGCATCCTTCG  
TGGCCCTTACAACCTAGTGTGTTGCACTACTACCAGATCGGTAGGTACTAAGTATCTTCCACAACATCTCAGGTTTAGAACC  
AATCCTAAAAGGGTTTGTAAACCTTGGCTTTTGGCCCCAGAGGCACCTGTTACCAGGTGTTGTTCCGCTGGCAATAGGAT  
GCTTTACAGAAAAACAACATTTTGTCTGTAAGCATCCTATTGCCAGCGGAACAACACCTGGTAACAGGTGCCCTCGGGGCC  
AAAAGCCAAGGTTTAAACAAACCTTTAGGATTTGGTTCTAAACCTGAGATGTTGTGGAAGATACTTAGTACCTACCGATCT  
GGTAGTAGTGCAAACACTAGTTGTAAGGCCACGAAGGATGCCGAGAAGGTACCCAAAGGAAAAAAGGGACCCAATGGAC  
CGGAATTGGGGCCAGGGACC  
>SRR2298573.724260 724260 length=500  
TTCGTGGGCCCTTACAACCTAGTGTGTTGCACTACTACCAGATCGGTAGGTACTAAGTATCTTCCACAACATCTCAGGTTTAG  
AACCAATCCTAAAAGGGTTTGTAAACCTTGGCTTTTGGCCCCAGAGGCACCTGTTACCAGGTGTTGTTCCGCTGGCAATA  
GGATGCTTTACAGCAAAATGTTGTTTCCAATAAGTTCCACACGTCACCAGACGTCTCACAAACTTACTAGAGGATGCCCT  
GTGTGGGCAAAACCTTATGCTCACACAGCCATCCTCTAGTAAGTTTGTGAGACGTCTGGTGACGTGTGGGAACTTATTGGA  
AACACATTTTGTCTGTAAGCATCCTATTGCCAGCGGAACAACACCTGGTAACAGGTGCCCTCTGGGGCCAAAAGCCAAGG  
TTTAAACAAACCTTTAGGATTTGGTTCTAAACCTGAGATGTTGTGGAAGATACTTAGTACCTACCGATCTGGTAGTAGTGC  
AAACACTAGTTGTAAGGCC  
>SRR2298573.708355 708355 length=500  
TCTAGTAAGTTTGTGAGACGTCTGGTGACGTGTGGGAACTTATTGGAACAACATTTTGTCTGTAAGCATCCTATTGCCA  
GCGGAACAACACCTGGTAACAGGTGCCCTCGGGGCCAAAAGCCAAGGTTTAAACAAACCTTTAGGATTTGGTTCTAAACCT  
GAGATGTTGTGGAAGATACTTAGTACCTACCGATCTGGTAGTAGTGCAAACACTAGTTGTAAGGCCACGAAGGATGCC  
AGAAGGTACCGATCCATAGTGTGCTGCTTGTACCTATGGGTACCTTCTGGGCATCCTTCGTGGGCCCTTACAACCTAGTGT  
GCACTACTACCAGATCGGTAGGTACTAAGTATCTTCCACAACATCTCAGGTTTAGAACCAATCCTAAAAGGGTTTGTAA  
CCTTGGCTTTTGGCCCCAGAGGCACCTGTTACCAGGTGTTGTTCCGCTGGCAATAGGATGCTTTCCAGCAAAATGTTGTT  
TCCAATAAGTTCCCAACCGA  
>SRR2298573.664456 664456 length=500  
GGCATTGATAAAAATAAAAGGAAACCGGGGATCCCCCGGGTTTGGCCACTAGACGTTTTTTAACCAGATCACCAAGAT  
AGAGGTACCTGGCCCCAGATCAGATCCATAGTGTGCTTGTACCTATGGGTACCTTCTGGGCATCCTTCGTGGGCCCTTA  
CAACTAGTGTGTTGCACTACTACCAGATCGGTAGGTACTAAGTATCTTCCACAACATCTCAGGTTTAGAACCAATCCTAAA  
GGGTTTGTAGTAAAGCATCCTATTGCCAGCGGAACAACACCTGGTAACAGGTGCCCTCTGGGGCCAAAAGCCAAGGTTTA  
ACAAACCTTTAGGATTTGGTTCTAAACCTGAGATGTTGTGGAAGATACTTAGTACCTACCGATCTGGTAGTAGTGCAAAAC  
ACTAGTTGTAAGGCCACGAAGGATGCCGAGAAGGTACCCATAGGTAACAAGCGACACAATGGATCTGATCTGGGGCCAG  
GGACCTCTATCTTGGGGATG  
>SRR2298573.584493 584493 length=500  
CCTTCTGGGCATCCTTCGTGGGCCCTTACAACCTAGTGTGTTGCACTACTACCAGATCGGTAGGTACTAAGTATCTTCCACAA

CATCTCAGGTTTAGAACCAATCCTAAAAGGGTTTGTAAAACCTTGGCTTTTGGCCCCAGAGGCACCTGTTACCAGGTGTTG  
TTCCGCTGGCAATAGGATGCTTTACAGCAAAATGTTGTTTCCAATAAGTTCCCACACGTACCAGACGTCTCACAAACTT  
ACTAAAGGATATCCTCTAGTAAGTTTGTGAGACGTCTGGTGACGTGTGGGAACTTATTTGGAAAACAACATTTTGTGTAAA  
GCATCCTATTGCCAGCGGAACAACACCTGGTAACAGGTGCCTCTGGGGCCAAAAGCCAAGGTTTAAACAAACCCCTTTAGGA  
TTGGTTCTAAACCTGAGATGTTGTGGAAGATACTTAGTACCTACCGATCTGGTAGTAGTGCAAAACACTAGTTGTAAGGCC  
CACGAAGGATGCCAGAAGG

>SRR2298573.530988 530988 length=500

CTGTTAGCTCTATTAGTGAGATACCATGCTTGTGGACCTTATGCTCACACAGCCATCCTCTAGTAAGTTTGTGAGACGT  
TGGTGACGTGTGGGAACTTATTTGGAAAACAACATTTTGTGTAAAAGCATCCTATTGCCAGCGGAACAACACCTGGTAACAG  
GTGCCCTCTGGGGCCAAAAGCCAAGGTTTAAACAAACCCCTTTAGGATTGGTTCTAAACCTGAGATGTTGTGGAAGATACTTA  
GTACCTACCGCCAAGATAGAGGTACCTGGCCCCAGATCAGATCCATAGTGTGCGCTTGTACCTATGGGTACCTTCTGGGC  
ATCCTTCGTGGGCCTTACAAC TAGTGTTCCTACTACTACCAGATCGGTAGGTACTAAGTATCTTCCACAACATCTCAGGT  
TTAGAACCAATCCTAAAAGGGTTTGTAAAACCTTGGCTTTTGGCCCCAGAGGCACCTGTTACCAGGTGTTGTTCCGCTGGC  
AATAGGATGCTTTACAGCAA

>SRR2298573.512385 512385 length=500

CCATAGTGTGCTTGTACCTATGGGTACCTTCTGGGCATCCTTCGTGGGCCTTACAAC TAGTGTTCCTACTACTACCAG  
ATCGGTAGGTACTAAGTATCTTCCACAACATCTCAGGTTTAGAACCAATCCTAAAAGGGTTTGTAAAACCTTGGCTTTTGG  
CCCCAGAGGCACCTGTTACCAGGTGTTGTTCCGCTGGCAATAGGATGCTTTACAGCAAAATGTTGTTTCCAATAAGTTCC  
CACACGTACCAGCCATCCTCTAGTAAGTTTGTGAGACGTCTGGTGACGTGTGGGAACTTATTTGGAAAACAACATTTTGT  
GTAAAGCATCCTATTGCCAGCGGAACAACACCTGGTAACAGGTGCCTCTGGGGCCAAAAGCCAAGGTTTAAACAAACCCCT  
TAGGATTGGTTCTAAACCTGAGATGTTGTGGAAGATACTTAGTACCTACCGATCTGGTAGTAGTGCAAAACACTAGTTGTA  
AGGCCCCGAAGGATGCCCA

>SRR2298573.476602 476602 length=500

GAACAACACCTGGTAACAGGTGCCTCTGGGGCCAAAAGCCAAGGTTTAAACAAACCCCTTTAGGATTGGTTCTAAACCTGAG  
ATGTTGTGGAAGATACTTAGTACCTACCGATCTGGTAGTAGTGCAAAACACTAGTTGTAAGGCCACGAAGGATGCCAGA  
AGGTACCCATAGGTAACAAGCGACACTATGGATCTGATCTGGGGCCAGGTACCTCTATCTTGGTGATCTGGTTAAAAAAC  
GTCTAGTGGGCCATAGTGGCATTTGATAAAAATAAAAAGGAAACCGGGGATCCCCCCCCGGGTTTGGCCCACTAGACGTTTTTT  
AACCAGATCACCAAGATAGAGGTACCTGGCCCCAGATCAGATCCATAGAGTGTGTTACCTATGGGTACCTTCTGGGC  
ATCCTTCGTGGGCCTTACAAC TAGTGTTCCTACTACTACCAGATCGGTAGGGACTAAGTATCTTCCCAAAACATCCCAGGT  
TTGGAACCAATCCTAAAAGG

>SRR2298573.293144 293144 length=500

TTTTTAACCAGATCACCAAGATAGAGGTACCTGGCCCCAGATCAGATCCATAGTGTGCTTGTACCTATGGGTACCTTC  
TGGGCATCCTTCGTGGGCCTTACAAC TAGTGTTCCTACTACTACCAGATCGGTAGGTACTAAGTATCTTCCACAACATCT  
CAGGTTTAGAACCAATCCTAAAAGGGTTTGTAAAACCTTGGCTTTTGGCCCCAGAGGCACCTGTTACCAGGTGTTGTTCCG  
CTGGCAATAGCTAGTAAGTTTGTGAGACGTCTGGTGACGTGTGGGAACTTATTTGGAAAACAACATTTTGTGTAAAGCAT  
CTATTGCCAGCGGAACAACACCTGGTAACAGGTGCCTCTGGGGCCAAAAGCCAAGGTTTAAACAAACCCCTTTAGGATTGGT  
TCTAAACCCGAGATGTTGGGGAAGATACTTAGTACCTACCGATCTGGTAGTAGTGAAAAACACTAGTTGTAAGGCCACGA  
AGGAGGCCCCGAAGGGACCC

>SRR2298573.260918 260918 length=500

GCTGTAAAGCATCCTATTGCCAGCGGAACAACACCTGGTAACAGGTGCCTCTGGGGCCAAAAGCCAAGGTTTAAACAAAC  
CTTTAGGATTGGTTCTAAACCTGAGATGTTGTGGAAGATACTTAGTACCTACCGATCTGGTAGTAGTGCAAAACACTAGTT  
GTAAGGCCACGAAGGATGCCAGAAGGTACCCATAGGTAACAAGCGACACTATGGATCTGATCTGGGGCCAGGTACCTC  
TATCTTGGTGCACCAAGATAGAGGTACCTGGCCCCAGATCAGATCCATAGTGTGCTTGTACCTATGGGTACCTTCTGG  
GCATCCTTCGTGGGCCTTACAAC TAGTGTTCCTACTACTACCAGATCGGTAGGTACTAAGTATCTTCCACAACATCTCAG  
GTTTAGAACCAATCCTAAAAGGGTTTGTAAAACCTTGGCTTTTGGCCCCAGAGGCACCTGTTACCCGGGGTTGTTCCGCTG  
GCAATAGGATGCTTTACAGC

>SRR2298573.165720 165720 length=500

TGCTCACACAGCCATCCTCTAGTAAGTTTGTGAGACGTCTGGTGACGTGTGGGAACTTATTTGGAAAACAACATTTTGTCTGT  
AAAGCATCCTATTGCCAGCGGAACAACACCTGGTAACAGGTGCCTCTGGGGCCAAAAGCCAAGGTTTAAACAAACCCCTTTA  
GGATTGGTTCTAAACCTGAGATGTTGTGGAAGATACTTAGTACCTACCGATCTGGTAGTAGTGCAAAACACTAGTTGTAAG  
GCCACGAAGCTTCTGGGCATCCTTCGTGGGCCTTACAAC TAGTGTTCCTACTACTACCAGATCGGTAGGTACTAAGTAT  
CTTCCACAACATCTCAGGTTTAGAACCAATCCTAAAAGGGTTTGTAAAACCTTGGCTTTTGGCCCCAGAGGAACCTGTTAC  
CAGGTGTTGTTCCGCTGGCAATAGGATGCTTTACAGCAAAATGTTGTTTCCATTAAGTTCCACACAGTCACCCACCGTCT  
CACAACTTACTAGAGGATG

>SRR2298573.147826 147826 length=500

GGTAACAGGTGCCTCTGGGGCCAAAAGCCAAGGTTTAAACAAACCCCTTTAGGATTGGTTCTAAACCTGAGATGTTGTGGAA  
GATACTTAGTACCTACCGATCTGGTAGTAGTGCAAAACACTAGTTGTAAGGCCACGAAGGATGCCAGAAGGTACCCATA  
GGTAACAAGCGACACTATGGATCTGATCTGGGGCCAGGTACCTCTATCTTGGTGATCTGGTTAAAAAACGTTCTAGTGGGC  
CAAACCCGGGTAGCAATTTGGTCCGAGCACATTAGAAGCATCATCTGCAACTTTGGTTAATAAATTAACCTCCAATTTCA

TACCTACATTTTCCACTCTCTCATTAACCTACATTGATAGTGGAAATCAACTGAACTGACCACTCCGGTCGCCATATCTGCA  
AAACTCTTAATTGTCTCCATAGTGGCATGGTTAAAAATAAAAAAGAAAACCGGGGAACCCCCCGGGTTGGGCCACAAAAAGG  
TTTTTTAACCAGATAACCAA

>SRR2298573.138574 138574 length=500

GCTGTATAGTTTGTGAGACGTCTGGTGACGTGTGGGAACTTATTGGAAACAACATTTTGTGCTGTAAGCATCCTATTGCCA  
GCGGAACAACACCTGGTAACAGGTGCCCTCTGGGGCCAAAAGCCAAGGTTTAAACAAACCTTTAGGATTGGTTCTAAACCT  
GAGATGTTGTGGAAGATACTTAGTACCTACCGATCTGGTAGTAGTGCAAACCCCTAGTTGTAAGGCCAACGAAGGATGCCC  
AGAAGGAACCCCAAGATAGAGGTACCTGGCCCCAGATCAGATCCATAGTGTGCTTGTACCTATGGGTACCTTCTGGGC  
ATCCTTCGTGGGCCTTACAACCTAGTGTTCGACTACTACCAGATCGGTAGGTACTAAGTATCTTCCACAACATCTCAGGT  
TTAGAACCAATCCTAAAAGGTTTGTAAACCTTGGCTTTTGGCCCCAGAGGCACCTGTTACCAGGTGTTGTTCCGCTGGC  
AATAGGATGCTTTACAGCAA

>SRR2298573.114824 114824 length=500

CCAAGATAGAGGTACCTGGCCCCAGATCAGATCCATAGTGTGCTTGTACCTATGGGTACCTTCTGGGCATCCTTCGTG  
GGCCTTACAACCTAGTGTTCGACTACTACCAGATCGGTAGGTACTAAGTATCTTCCACAACATCTCAGGTTTAGAACCAA  
TCCTAAAAGGTTTGTAAACCTTGGCTTTTGGCCCCAGAGGCACCTGTTACCAGGTGTTGTTCCGCTGGCAATAGGATGC  
TTTACAGCAACTAGTAAGTTTGTGAGACGTCTGGTGACGTGTGGGAACTTATTGGAAACAACATTTTGTGCTGTAAGCATC  
CTATTGCCAGCGGAACAACACCTGGTAACAGGTGCCCTCTGGGGCCAAAAGCCAAGGTTTAAACAAACCTTTAGGATTGGT  
TCTAAACCTGAGATGTTGTGGAAGATACTTAGTACCTACCGATCTGGTAGTAGTGCAAACACTAGTTGTAAGGCCACGA  
AGGATGCCCAGAAAGGTACCC

>SRR2298573.95695 95695 length=500

ACCTTATGCTCACACAGCCATCCTCTAGTAAGTTTGTGAGACGTCTGGTGACGTGTGGGAACTTATTGGAAACAACATTT  
TGCTGTAAGCATCCTATTGCCAGCGGAACAACACCTGGTAACAGGTGCCCTCTGGGGCCAAAAGCCAAGGTTTAAACAAAC  
CCTTTAGGATTGGTTCTAAACCTGAGATGTTGTGGAAGATACTTAGTACCTACCGATCTGGTAGTAGTGCAAACACTAGT  
TGTAAGGCCCGGTTTGGCCCACTAGACGTTTTTAAACAGATCACCAAGATAGAGGTACCTGGCCCCAGATCAGATCCAT  
AGTGTGCTTGTACCTATGGTACCTTCCGGGCATCCTTCGTGGGCCTTACCCTCGCTTTCGACTACTACCAGATCG  
GTAGGAACCTAAGTATCTTCCACAACAATTTAGGTTTAGAACCAATCCCAAAGGTTTAAACCTTGGCCTTTGTCCCC  
GAAGGACCCAGTTACCGGGG

>SRR2298566.272602 272602 length=500

TCAAGATACTTTGCAGCAGTACGGTGTGGTTTTTCATTTTTCAAGTACAAGTGAATGTTAATCAAGGAACAGCTGGTAGTGC  
ATTGGTGGTGTATGAACCCAAACCTGTTGTGACATATGACTCAAAGTTAGAATTTGGAGCATTTACCAATCTACCACATG  
TGTTGATGAATTTGGCTGAGACAACACAGGCTGATTTATGTATCCCTATGTTGCTGCCACAAACAATGTTAAAACAGAT  
TCGTCAAACCTACCTGAAGGTATGGATAAAGGTGTCCAAACATAGACTTTTAGTTGCCCTAAGTCTGACGAATCTGTTTTA  
ACATAGTTTGTGTCAGCAACATAGGGGATACATAAATCAGCCTGTGTGGTCTCAGCCAAATTCATCAACACATGTGGTAG  
ATTGGTAAATGCTCAAATTTCAACTTTGAGTCATATGTCACAACAGGTTTGGGTTTCATACACCACCAATGCACTACCAG  
CTGTTCCCTGATTAACATTC

>SRR2298546.837218 837218 length=501

GGGCTGGAGGACATCAGATAAACCATGTGGAACCTACCAAAAGTCTTTTGGGACAAAAACAGCAAGCCAGCCTATGGCCAA  
TCAAGATACTTTGCAGCAGTACGGTGTGGTTTTTCATTTTTCAAGTACAAGTGAATGTTAATCAAGGAACAGCCGGTAGTGC  
ATTGGTGGTGTATGAACCCAAACCTGTTGTGACATATGACTCAAAGTTAGAATTTGGAGCGTTTACCAATTTACCACATG  
TGTTGATGAATAAACTACCAATATGGTAACATCAACTTGTGTAGCAGAACCTGAAGGTATGGATAAAGGTGTCCAAACA  
TAGACTTTTAGTTGCCCTAAGTCTGACGAATCTGTTTTAACATAGTTTGTGTGTCAGCAACATAGGGGATACATAAATCAGC  
CTGTGTGGTCTCAGCCAAATTCATCAACACATGTGGTAAATTTGGTAAACGCTCCAAATTTCTAACTTTGAGTCATATGTCA  
CAACAGGTTTGGGTTCAACA

>SRR2298546.758593 758593 length=500

ACCCAATATGGTAACATCAACTTGTGTAGCAGAACCTGAAGGTATGGATAAAGGTGTCCAAACATAGACTTTTTAGTTGCC  
CTAAGTCTGACGAATCTGTTTTAACATAGTTTGTGTGACGAACATAGGGGATACATAAATCAGCCTGTGTGGTCTCAGCC  
AAATTCATCAACACATGTGGTAAATTTGGTAAACGCTCCAAATTTCTAACTTTGAGTCATATGTCACAACAGGTTTGGGTT  
ATACACCACCAATCAAGATACTTTGCAGCAGTACGGTGTGGTTTTTCATTTTTCAAGTACAAGTGAATGTTAATCAAGGAAC  
AGCCGGTAGTGCATTTGGTGGTGTATGAACCCAAACCTGTTGTGACATATGACTCAAAGTTAGAATTTGGAGCGTTTACCA  
ATTTACCACATGTGTTGATGAATTTGGCTGAGACCACACAGGCTGATTTATGTATCCCTATGTTGCTGACACAAACTAT  
GTTAAAACAGATTCGTCAGA

>SRR2298546.171832 171832 length=502

CGGTAGTGCATTGGTGGTGTATGAACCCAAACCTGTTGTGACATATGACTCAAAGTTAGAATTTGGAGCGTTTACCAATT  
TACCACATGTGTTGATGAATTTGGCTGAGACCACACAGGCTGATTTATGTATCCCTATGTTGCTGACACAAACTATGTT  
AAAACAGATTCGTCAGACTTAGGGCAACTAAAAGTCTATGTTTGGACACCTTTATCCATACCTTCAGGTTCTGCTACACA  
AGTTGATGTTAAACCAAAGCAATTTGATTGCGCTGCAGTGGTACTCAATACGTTTCGCCATGTTTCATAGAACCTGGCCCTTCT  
GCAATGTCAATTTTTCCCTAGTCCACTTGTATTTAGTGCTCATTTGTAAGAATTTTCTTAAGATTTTGTCTCCGCGTTTGT  
TGCATTGTCATAAATACCAACGCTTTGACCGAATACCTTAGGATTTTGGAGTCCAATTTGCAATAAGCTACCCAATATGG  
TAACATCAACTTGTGTAGCAGA

>SRR2298546.85661 85661 length=502  
GGTGGTGTATGAAACCCAAACCTGTTGTGACATATGACTCAAAGTTAGAATTTGGAGCGTTTACCAATTTACCACATGTGT  
TGATGAATTTGGCTGAGACCACACAGGCTGATTTATGTATCCCCTATGTTGCTGACACAAACTATGTTAAAAACAGATTCG  
TCAGACTTAGGGCAACTAAAAGTCTATGTTTGGACACCTTTATCCATACCTTCAGGTTCTGCTACACAAGTTGATGTTAC  
CATATTTGGGTAGTCATAAATACCAACGTCCTTGACCGAATACCTTAGGATTTTGGAAAGTCCAATTGCAATAAGCTACCCAA  
TATGGTAACATCAACTTGTGTAGCAGAACCTGAAGGTATGGATAAAGGTGTCCAAACATAGACTTTTAGTTGCCCTAAGT  
CTGACGAATCTGTTTAAACATAGTTTGTGTGTCAGCAACATAGGGGATACATAAATCAGCCTGTGTGGTCTCAGCCAAATTC  
ATCAACACATGTGGTAAATTGG

>SRR2298382.81982 81982 length=502  
TAGAGGTACCTGGCCCCAGATCAGATCCATAGTGTGCGCTTGTTACCTATGGGTACCTTCTGGGCCCTCCTTCGTGGGCCTT  
ACAAC TAGTGTTCGACTACTACCAGATCGGTAGGTACTAAGTATCTTCCACAACATCTCAGGTTTAGAACCAATCCTAA  
AGGGTTTGTAAAACCTTGGCTTTTGGCCCCAGAGGCACCTGTTACCAGGTGTTGTTCCGCTGGCAATAGGATGCTTTACA  
GCAAAATGTTGCTGGTGACGTGTGGAACTTATTTGGAAACAACATTTTGTGTAAGCATCCTATTGCCAGCGGAACAAC  
ACCTGGTAACAGGTGCCCTTGGGGCCAAAAGCCAAGGTTTAAACAAACCTTTAGGATTTGTTCTAAAACCTGAGATGTTGT  
GGAAGATACTTAGTACCTACCGATCTGGTAGTAGTGCAAACTAGTTGTAAGGCCACGAAGGATGCCAGAAGGTACC  
CATAGGTAACAAGCGACTAA

>SRR2298573.824788 824788 length=500  
GGGGCCAAAAGCCAAGGTTTAAACAAACCTTTAGGATTTGGTTCTAAAACCTGAGATGTTGTGGAAGATACTTAGTACCTAC  
CGATCTGGTAGTAGTGCAAACTAGTTGTAAGGCCACGAAGGATGCCAGAAGGTACCCATAGGTAACAAGCGACT  
ATGGATCTGATCTGGGGCCAGGTACCTCTATCTTGGTGATCTGGTTAAAAAACGTCCTAGTGGGCCAAAACCCGGGGGGAT  
CCCCGGTTTCTGTACTACATCTTTGTTCTCTGGTTCAGCTGTTGTAGCATAGCAATTTGGTCCGAGCACATTAGAAGCA  
TCATCTGCAACTTTGGTTAATAAATACCTCCAATTTCACTTAAATTTTCCACTCTCTCATTAACTACATTTGATAGT  
GGAATCAACTGAACTGACCCTCCGGTGGCCAAAACCTGCAATACCTTTAATTTGTCTCCACAGTGGCATGGTGAAAAAAA  
AGGAAACCGGGGATCCCCC

>SRR2298573.800813 800813 length=500  
CTAGTAAGTTTGTGAGACGTCCTGGTGACGTGTGGAACTTATTGGAAACAACATTTTGTGCTGTAAGCATCCTATTGCCAG  
CGGAACAACACCTGGTAACAGGTGCCCTCTGGGGCCAAAAGCCAAGGTTTAAACAAACCTTTAGGATTGGTTCTAAAACCTG  
AGATGTTGTGGAAGATACTTAGTACCTACCGATCTGGTAGTAGTGCAAACTAGTTGTAAGGCCACGAAGGATGCCCA  
GAAGGTACCAATCCATAGTGTGCGCTTGTTACCTATGGGTACCTTCTGGGCATCCTTCGTGGGCCTTACAAC TAGTGT  
CACTACTACCAGATCGGTAGGTACTAAGTATCTTCCACAACATCTCAGGTTTAGAACCAATCCTAAAAGGTTTGTAAAAC  
CTTGGCTTTTGGCCCCAGAGGCACCTGTTACCAGGGGTTGTTCCGCTGGCAATAGGATGCTTTACAGCAAAATGTTGTTT  
CCAATAAGTTCCACACGTC

>SRR2298573.779215 779215 length=500  
GGCATTGATAAAAATAAAAGGAAACCGGGGATCCCCCGGGTTTGGCCCACTAGACGTTTTTTTAAACCAGATCACCAAGAT  
AGAGGTACCTGGCCCCAGATCAGATCCATAGTGTGCTTGTACCTATGGGTACCTTCTGGGCATCCTTCGTGGGCCTTA  
CAACTAGTGTTCGACTACTACCAGATCGGTAGGTACTAAGTATCTTCCACAACATCTCAGGTTTAGAACCAATCCTAAA  
GGGTTTGTATGTGGGCACTTATTGGAAACAACATTTTGTGTAAGCATCCTATTGCCAGCGGAACAACACCTGGTAAC  
AGGTGCCCTCTGGGGCCAAAAGCCAAGGTTTACCAAAACCTTTAGGATTTGTTCTAAAACCTGAGATGTTGTGGAAGATACT  
TAGTACCTACCGATCTGGTAGTAGTGCAAACTAGTTGTAAGGCCACGAAGGATGCCAGAAGGTACCCATAGGGAAC  
AAGGGACACTATGGATCTGA

>SRR2298573.758263 758263 length=500  
GCATTGATAAAAATAAAAGGAAACCGGGGATCCCCCGGGTTTGGCCCACTAGACGTTTTTTTAAACCAGATCACCAAGATA  
GAGGTACCTGGCCCCAGATCAGATCCATAGTGTGCTTGTACCTATGGGTACCTTCTGGGCATCCTTCGTGGGCCTTAC  
AACTAGTGTTCGACTACTACCAGATCGGTAGGTACTAAGTATCTTCCACAACATCTCAGGTTTAGAACCAATCCTAAA  
GGTTTGTAAAAGGTTTAAACAAACCTTTAGGATTTGGTTCTAAAACCTGAGATGTTGTGGAAGATACTTAGTACCTACCGAT  
CTGGTAGTAGTGCAAACTAGTTGTAAGGCCACGAAGGATGCCAGAAGGTACCCATAGGTAACAAGCGACTATAGG  
ATCTGATCTGGGGCCAGGTACCTCTATCTTGGTGATCTGGTTAAAAAACGTCCTAGGGGGCCAAAACCCGGGGGGATCCCC  
GGGTTCTTTTATTTTTTTCA

>SRR2298573.736368 736368 length=500  
ATGGGTACCTTCTGGGCATCCTTCGTGGGCCTTACAAC TAGTGTTCGACTACTACCAGATCGGTAGGTACTAAGTATCT  
TCCACAACATCTCAGGTTTAGAACCAATCCTAAAAGGTTTGTAAAACCTTGGCTTTTGGCCCCAGAGGCACCTGTTACCA  
GGTGTGTTCCGCTGGCAATAGGATGCTTTACAGCAAAATGTTGTTTCCAATAAGTTCCACACGTCACCAGACGTCCTCA  
CAAACCTTACAGGGGTGGTAGATGGCGTGCCATAGCTCTATAGTGAGATAACCATGCTTGTGGACCTTATGCTCACACAGC  
CATCCTCTAGTAAGTTTGTGAGACGTCCTGGTGACGTGTGGGAACTTATTGGAAACAACATTTTGTGTAAGCATCCTAT  
TGCCAGCGGAACAACACCTGGTAACAGGTGCCCTCTGGGGCCAAAAGCCCAGGTTTAAACAAACCTTTAGGATTGGTTCTA  
AACCTGAGATGTTGGGGAAA

>SRR2298573.593802 593802 length=500  
ACCTATGGGTACCTCCTGGGCATCCTTCGTGGGCCTTACAAC TAGTGTTCGACTACTACCAGATCGGTAGGTACTAAGT  
ATCTTCCACAACATCTCAGGTTTAGAACCAATCCTAAAAGGTTTGTAAAACCTTGGCTTTTGGCCCCAGAGGCACCTGTT



ACCAGGTGTTGTTCCGCTGGCAATAGGATGCTTTACAGCAAAAAGTTGTTTCCAATAAGTTCCCACACGTCACCAGACGT  
CTCCCAAACTATTAGTGAGATAACCATGCTTGTGGACCTTATGCTCACACAGCCATCCTCTAGTAAGTTTGTGAGACGTCT  
GGTGACGTGTGGGAACTTATTGGAAACAACATTTTGTCTGTAAGCATCCTATTGCCAGCGGAACAACACCTGGTAACAGG  
TGCTCTGGGGCCAAAAGCCAAGGTTTAAACAAACCCTTTAGGATTGGTTCTAAACCTGAGATGTTGTGGAAGATACTTAG  
TACCTACCGATCTGGTAGTA

>SRR2298573.582811 582811 length=500

CTCTTAATTGTCTCCATAGTGGCATTGATAAAAATAAAAGGAAACCGGGGATCCCCCCGGGTTTGGCCCACTAGACGTTT  
TTTAAACCAGATCACCAAGATAGAGGTACCTGGCCCCAGATCAGATCCATAGTGTGCTTGTACCTATGGGTACCTTCTG  
GGCATCCTTCGTGGGCTTACAACACTAGTGTGTTGCACTACTACCAGATCGGTAGGAACTAAGGATCTTCCACAACATCCCA  
GGTTTGTAGAAAGGTCTAACAACCCCTTTAGGATTGGTTCTAAACCTGAGATGTTGTGGAAGATACTTAGTACCTACCGATC  
TGGTAGTAGTGCAAAACTAGTTGTAAGGCCACGAAAGGATGCCCAGAAGGTACCCATAGGTAACAAGCGACACTATGGA  
TCTGATCTGGGGCCAGGTACCTCTATCTTGGGGATCTGGTTAAAAAACGCTCTAGTGGGCCAAAACCGGGGGGGATCCCCG  
GTTTCTTTTATTTTATCAA

>SRR2298573.563998 563998 length=500

CACCAAGATAGAGGTACCTGGCCCCAGATCAGATCCATAGTGTGCTTGTACCTATGGGTACCTTCTGGGCATCCTTCG  
TGGGCCCTTACAACACTAGTGTGTTGCACTACTACCAGATCGGTAGGTAAGTATCTTCCACAACATCTCAGGTTTAGAACC  
AATCTTAAAGGGTTTGTAAACCTTGGCTTTTGGCCCCAGAGGCACCTGTTACCAGGTGTTGTTCGCTGGCAATAGGAT  
GCTTTACAGAGGTGACGTGTGGGAACTTATTGGAAACAACATTTTGTCTGTAAGCATCCTATTGCCAGCGGAACAACACC  
TGGTAACAGGTGCCTCTGGGGCCAAAAGCCAAGGTTTAAACAAACCCTTTAGGATTGGTTCTAAACCTGAGATGTTGTGGA  
AGATACTTAGAACCTACCGATCTGGTAGTAGTGCAAAACTAGTTGTAAGGCCACGAAAGGATGCCCAGAAGGAAACCCCT  
AGGTACAAAACGACACTATG

>SRR2298573.544508 544508 length=500

TACAACACTAGTGTGTTGCACTACTACCAGATCGGTAGGTAAGTATCTTCCACAACATCTCAGGTTTAGAACCAATCCTA  
AAGGGTTTGTAAACCTTGGCTTTTGGCCCCAGAGGCACCTGTTACCAGGTGTTGTTCGCTGGCAATAGGATGCTTTAC  
AGCAAAATGTTGTTCCAATAAGTTCCACACGTCACCAGACGTCACAAACTTACTAGAGGATGGCTGTGTGAGCATA  
AGGTCCACAGCTATTAGTGAGATAACCATGCTTGTGGACCTTATGCTCACACAGCCATCCTCTAGTAAGTTTGTGAGACGT  
CTGGTGACGTGTGGGAACTTATTGGAAACAACATTTTGTCTGTAAGCATCCTATTGCCAGCGGAACAACACCTGGTAACA  
GGTGCCTCTGGGGCCAAAAGCCAAGGTTTAAACAAACCCTTTAGGATTGGTTCTAAACCTGAGATGTTGTGGAAGATACTT  
AGTACCTACCGGTCTGGGAG

>SRR2298573.509938 509938 length=500

TTAACAACCCCTTTAGGATTGGTTCTAAACCTGAGATGTTGTGGAAGATACTTAGTACCTACCGATCTGGTAGTAGTGCA  
AACACTAGTTGTAAGGCCACGAAGGATGCCAGAAGGTACCCATAGGTAACAAGCGACACTATGGATCTGATCTGGGGC  
CAGGTACCTCTATCTTGGTGATCTGGTTAAAAAACGTCCTAGTGGGCCAAACCCGGGGGGATCCCCGGTTTCTTTTATT  
TTATCAATGCACTCTTAATTGTCTCCATAGTGGCATTGATAAAAATAAAAGGAAACCGGGGATCCCCCGGGTTTGGCCC  
ACTAGACGTTTTTTAACCAGATCACCAAGATAGAGGTACCTGGCCCCAGATCAGATCCATAGTGTGCTTGTACCTATG  
GGTACCTTCTGGGCATCCTTCGTGGGCCCTTACAACACTAGTGTGTTGCACTACTACCCGATCGGTAGGAACTAAGAAACTTCC  
CCAACATCTCAGGTTTAGAA

>SRR2298573.486398 486398 length=500

CCTTCTGGGCATCCTTCGTGGGCCCTTACAACACTAGTGTGTTGCACTACTACCAGATCGGTAGGTAAGTATCTTCCACAA  
CATCTCAGGTTTAGAACCAATCCTAAAGGGTTTGTAAACCTTGGCTTTTGGCCCCAGAGGCACCTGTTACCAGGTGTTG  
TTCCGCTGGCAATAGGATGCTTTACAGCAAAATGTTGTTTCCAATAAGTTCCACACGTCACCAGACGTCACAAACTT  
ACTAGAGGAGCTTGTGGACCTTATGCTCACACAGCCATCCTCTAGTAAGTTTGTGAGACGTCCTGGTGACGTGTGGGAACT  
TATTGGAAACAACATTTTGTCTGTAAGCATCCTATTGCCAGCGGAACAACACCTGGTAACAGGTGCCTCTGGGGCCAAAA  
GCCAAGGTTTAAACAACCCCTTTAGGATTGGTTCTACACCTGAGCTGTTGTGGAAGAACTTAGTAACAACCGATCTGGCA  
GTAGGGCAAAAACACTAGTGGA

>SRR2298573.462636 462636 length=500

GATCACCAAGATAGAGGTACCTGGCCCCAGATCAGATCCATAGTGTGCTTGTACCTATGGGTACCTTCTGGGCATCCT  
TCGTGGGCCCTTACAACACTAGTGTGTTGCACTACTACCAGATCGGTAGGTAAGTATCTTCCACAACATCTCAGGTTTAGA  
ACCAATCCTAAAGGGTTTGTAAACCTTGGCTTTTGGCCCCAGAGGCACCTGTTACCAGGTGTTGTTCCGCTGGCAATAG  
GATGCTTTACGTTGAGAGACGTCCTGGTGACGTGTGGGAACTTATTGGAAACAACATTTTGTCTGTAAGCATCCTATTGCC  
AGCGGAACAACACCTGGTAACAGGTGCCTCTGGGGCCAAAAGCCAAGGTTTAAACAAACCCTTTAGGATTGGTTCTAAACC  
TGAGATGTTGTGGAAGATACTTAGTACCTACCGATCTGGTAGTAGTGCAAAACTAGTTGTAAGGGCCACAAGGAGTCC  
CAGAAGGGACCCAAAGGTAA

>SRR2298573.451956 451956 length=500

CTTGTGGACCTTATGCTCACACAGCCATCCTCTAGTAAGTTTGTGAGACGTCCTGGTGACGTGTGGGAACTTATTGGAAAC  
AACATTTTGTCTGTAAGCATCCTATTGCCAGCGGAACAACACCTGGTAACAGGTGCCTCTGGGGCCAAAAGCCAAGGTTT  
AACAAAACCCCTTTAGGATTGGTTCTAAACCTGAGATGTTGTGGAAGATACTTAGTACCTACCGATCTGGTAGTAGTGCAAA  
CACTAGTTGAGATCCATAGTGTGCTTGTACCTATGGGTACCTTCTGGGCATCCTTCGTGGGCCCTTACAACACTAGTGTGTT  
GCACTACTACCAGATCGGTAGGTAAGTATCTTCCACAACATCTCAGGTTTAGAACCAATCCTAAAGGGTTTGTAA

CCTTGGCTTTTGGCCCCAGAGGCACCTGTTACCAGGGGTTGTTCCGCTGGCAATAGGATGCTTTACAGCAAAAATGTTGTT  
TCCAATAAGTTCCACCCCGC  
>SRR2298573.406175 406175 length=500  
ACACCTGGTAACAGGTGCCCTCTGGGGCCAAAAGCCAAGGTTTAAACAAACCCCTTTAGGATTTGGTTCTAAACCTGAGATGTT  
GTGGAAGATACTTAGTACCTACCGATCTGGTAGTAGTGCAAACACTAGTTGTAAGGCCACGAAGGATGCCCAGAAGGTA  
CCCATAGGTAACAAGCGACACTATGGATCTGATCTGGGGCCAGGTACCTCTATCTTGGGGATCTGGTTAAAAAACGTCTA  
GTGGGCCAAAAATAAAAGGAAACCGGGGATCCCCCCCCGGGTTTGGCCCACTAGACGTTTTTTTAAACCAGATCACCAAGATA  
GAGGTACCTGGCCCCAGATCAGATCCATAGTGTGCTTGTACCTATGGGTACCTTCTGGGCATCCTTCGTGGGCCCTTAC  
AACTAGTGTTTGCACTACTACCAGATCGGTAGGTACTAAGTATCTTCCACAACATCTCAGGTTTAGAACCAATCCTAAAG  
GGTTTGTAAACCTTTGGCTT  
>SRR2298573.401580 401580 length=500  
TTAACAAACCCCTTTAGGATTTGGTTCTAAACCTGAGATGTTGTGGAAGATACTTAGTACCTACCGATCTGGTAGTAGTGCA  
AACACTAGTTGTAAGGCCACGAAGGATGCCCAGAAGGTACCCATAGGTAACAAGCGACACTATGGATCTGATCTGGGGC  
CAGGTACCTCTATCTTGGTGATCTGGTTAAAAAACGTCTAGTGGGCCAAACCCGGGGGGGATCCCCGGTTTTCTTTTATT  
TTATCAATGCGCTGTTCTCTGGTTCAGCTGTTGTAGCATAGCAATTTGGTCCGAGCACATTAGAAGCATCATCTGCAACT  
TTGGTTAATAAATTACCTCAATTTCAATTACCTACATTTTCCACTCTCTCATTAACTACATTGATAGTGAATCAACTGA  
ACTGACCACTCCGGTAGCCATATTTGCAATACTCTTAATTTGGTCCATAGTGGCATTGCTAAAAATAAAAGGAAACCGGGG  
ATCCCCCCCCGGGGTTGGCCA  
>SRR2298573.350726 350726 length=500  
GCATTGATAAAAATAAAAGGAAACCGGGGATCCCCCCCCGGGTTTGGCCCACTAGACGTTTTTTTAAACCAGATCACCAAGATA  
GAGGTACCTGGCCCCAGATCAGATCCATAGTGTGCTTGTACCTATGGGTACCTTCTGGGCATCCTTCGTGGGCCCTTAC  
AACTAGTGTTTGCACTACTACCAGATCGGTAGGTACTAAGTATCTTCCACAACATCTCAGGTTTAGAACCAATCCTAAAG  
GGTTTGTAAAGCATCCTATTTGCCAGCGGAACACCACCTGGTAACAGGTGCCCTCTGGGGCCAAAAGGCCAAGGTTTAAACCA  
CCCTCTAGGATTTGGTTCTAAACCTGAGATGTTGTGGAAGATACTTAGTACCTACCGATCTGGTAGTAGTGCAAACACTAG  
TTGTAAGGCCCATGAAGGAGGCCAGAAGGAACCCATAGGAAAAAAGCGACCTATGGAACGGATCTGGGGCCAGGGACC  
CCTACCTTGGGGATCTGGTA  
>SRR2298573.330438 330438 length=500  
GCTTGTACCTATGGGTACCTTCTGGGCATCCTTCGTGGGCCCTTACAACACTAGTGTTTGCACTACTACCAGATCGGTAGGT  
ACTAAGTATCTTCCACAACATCTCAGGTTTAGAACCAATCCTAAAAGGTTTGTAAACCTTTGGCTTTTGGCCCCAGAGGC  
ACCTGTTACCAGGTGTTGTTCCGCTGGCAATAGGATGCTTTACAGCAAAAATGTTGTTTCCAATAAGTTCCACACGTCAC  
CAGACGTCCTGCTGCTCCACTAGTTGAAGGCAACTTGCAATAAAATGAGTGGAAACAAGACGCTTAAAGCATGGGG  
TAATTTAGCTTTTCTAACCACATTTTGTGTGGGGTGGCAGATGGCGTGCCATAGCTCTCTTAGTGAGATAACCATGCTTG  
TGGACCTTATGCTCACACAGCCATCCTCTGTTAAATTTGTGAGACGCTTGGAACGTTGGGGAACTTATTGGCAAAAAA  
TTTTGCTGTAAAGCATCCTG  
>SRR2298573.321918 321918 length=500  
CAACTAGTGTTTGCACTACTACCAGATCGGTAGGTACTAAGTATCTTCCACAACATCTCAGGTTTAGAACCAATCCTAAA  
GGGTTTGTAAACCTTTGGCTTTTGGCCCCAGAGGCACCTGTTACCAGGTGTTGTTCCGCTGGCAATAGGATGCTTTACAG  
CAAAAATGTTGTTTCCAATAAGTTCCACACGTCACCAGACGTCACAAAATTAAGTAGAGGATGGCTGTGTGAGCATAAG  
GTCCACAAGGCTATTAGTGAGATAACCATGCTTGTGGACCTTATGCTCACACAGCCATCCTCTAGTAAGTTTGTGAGACGT  
CTGGTGACGTTGGGAACTTATTGGAAACAACATTTTGTGTAAGCATCCTATTGCCAGCGGAACAACACCTGGTAACA  
GGTGCTCTGGGGCCAAAAGCCAAGGTTAACAAACCCCTTTAGGATTTGGTTCTAAACCTGAGATGTTGTGGAAGAGACTT  
AGTACCTACCGTTCTGGTAG  
>SRR2298573.300070 300070 length=500  
CCATAGTGTGCTTGTACCTATGGGTACCTTCTGGGCATCCTTCGTGGGCCCTTACAACACTAGTGTTTGCACTACTACCAG  
ATCGGTAGGTACTAAGTATCTTCCACAACATCTCAGGTTTAGAACCAATCCTAAAAGGTTTGTAAACCTTTGGCTTTTGG  
CCCCAGAGGCACCTGTTACCAGGTGTTGTTCCGCTGGCAATAGGATGCTTTACAGCAAAAATGTTGTTTCCAATAAGTTCC  
CACACGTCACCTCTAGTAAGTTTGTGAGACGTCCTGGTGACGTTGGGAACTTATTGGAAACAACATTTTGTGTAAGGCA  
TCCTATTGCCAGCGGAACAACACCTGGTAACAGGTGCCCTCTGGGGCCAAAAGCCAAGGTTTAAACAAACCCCTTTAGGATTTG  
GTTCTAAACCTGAGATGGTGTGGAAGATACTTAGTACCTACCGATCTGGTAGTAGTGCAAAACACTAGTTGTAAGGCCAC  
GAAGGATGCCAGAAGGTAC  
>SRR2298573.280250 280250 length=500  
GCCAAAAGCCAAGGTTTAAACAAACCCCTTTAGGATTTGGTTCTAAACCTGAGATGTTGTGGAAGATACTTAGTACCTACCGA  
TCTGGTAGTAGTGCAAAACTAGTTGTAAGGCCACGAAGGATGCCCAGAAGGTACCCATAGGTAACAAGCGACACTATG  
GATCTGATCTGGGGCCAGGTACCTCTATCTTGGTGATCTGGTTAAAAAACGTCATAGTGGGCCAAACCCGGGGGGGATCCC  
CGGTTTCCCTTTAATTGTCTCCATAGTGGCATTGATAAAAAATAAAAGGAAACCGGGGATCCCCCCCCGGGTTTGGCCCACTAG  
ACGTTTTTTTAAACCAGATCACCAAGATAGAGGTACCTGGCCCCAGATCAGATCCATAGTGTGCTTGTACCTATGGGTAC  
CTTCTGGGCATCCTTCGTGGGCCCTTACAACACTAGTGTTTGCACTACTACCAGATCGGTAGGTACAAAAGCAGCTTCCCCAAC  
ATCCCAGGTTTAGAACCAAC  
>SRR2298573.250564 250564 length=500

CTTGTGGACCTTATGCTCACACAGCCATCCTCTAGTAAGTTTGTGAGACGTCTGGTGACGTGTGGGAACTTATTGGAAAC  
AACATTTTGTCTGTAAAGCATCCTATTGCCAGCGGAAACAACACCTGGTAACAGGTGCCCTCTGGGGCCAAAAAGCCAAGGTTT  
AACAAAACCTTTAGGATTTGGTTCTAAACCTGAGATGTTGTGGAAAGATACTTAGTACCTACCGATCTGGTAGTAGTGCAAA  
CACTAGTTGACCATAGTGTGCTTGTACCTATGGGTACCTTCTGGGCATCCTTCGTGGGCCTTACAACCTAGTGTGTTGCA  
CTACTACCAGATCGGTAGGTACTAAGTATCTTCCCAACATCTCAGGTTTGAACCAATCTTAAAGGGTTTGTAAACCT  
TGGCTTTTGGCCCCAGAGGCACCTGTTACCAGGGGTGTTCCCGGGGCAAAAAGGATCCTTTCAACACAAATGTTGTTTCC  
AAAAAGTTCCCACCAGGCC

>SRR2298573.191538 191538 length=500

CAACTGAACTGACCACTCCGGTCGCCATATCTGCAATACTCTTAATTGTCTCCATAGTGGCATTGATAAAAAATAAAAGGAA  
ACCGGGGATCCCCCGGGTTTGGCCCACTAGACGTTTTTTTAAACCAGATCACCAAGATAGAGGTACCTGGCCCCAGATCA  
GATCCATAGTGTGCTTGTACCTATGGGTACCTTCTGGGCATCCTTCGTGGGCCTTACAACCTAGTGTGTTGCACTACTAC  
CAGATCGGTGGGGCCAAAAGCCAAGGTTTAAACAAACCTTTAGGATTTGGTTCTAAACCTGAGATGTTGTGGAAGATACTT  
AGTACCTACCGATCTGGTAGTAGTGCAAACTAGTTGTAAGGCCACGAAGGATGCCAGAAGGTACCCATAGGTAACA  
AGCGACACTATGGATCTGATCTGGGGCCAGGTACCTCTATCTTGGTGATCTGGTTAAAAAACGTCCTAGTGGGCCAAAACC  
GGGGGGATCCCCGGTTTCC

>SRR2298573.142735 142735 length=500

GAGGTACCTGGCCCCAGATCAGATCCATAGTGTGCTTGTACCTATGGGTACCTTCTGGGCATCCTTCGTGGGCCTTAC  
AACTAGTGTGTTGCACTACTACCAGATCGGTAGGTACTAAGTATCTTCCACAACATCTCAGGTTTGAACCAATCTTAAAG  
GGTTTGTAAACCTTTGGCTTTTGGCCCCAGAGGCACCTGTTACCAGGTGTTGTTCCGCTGGCAATAGGATGCTTTACAGC  
AAAAATGTTGTTGTGAGACGTCTGGTGACGTGTGGGAACTTATTGGAAACAACATTTTGTCTGTAAAGCATCCTATTGCCAG  
CGGAACAACACCTGGTAACAGGTGCCTCTGGGGCCAAAAGCCAAGGTTTAAACAAACCTTTAGGATTTGGTTCTAAACCTG  
AGATGTTGTGGAAGATACTTAGTACCTACCGATCTGGTAGTAGTGCAAACTAGTTGTAAGGCCCCGAAGGATGACCA  
GAAGGGACCCAAAAGGTAACA

>SRR2298573.100807 100807 length=500

GGTACCTTCTGGGCATCCTTCGTGGGCCTTACAACCTAGTGTGTTGCACTACTACCAGATCGGTAGGTACTAAGTATCTTCC  
ACAACATCTCAGGTTTGAACCAATCTTAAAGGGTTTGTAAACCTTTGGCTTTTGGCCCCAGAGGCACCTGTTACCAGGT  
GTTGTTCCGCTGGCAATAGGATGCTTTACAGCAAAATGTTGTTTCCAATAAGTTTCCACACGTCACCAGACGTCCTCACAA  
ACTTACTAGGCAGCCATCCTCTAGTAAGTTTGTGAGACGTCTGGTGACGTGTGGGAACTTATTGGAAACAACATTTTGTCT  
GTAAAGCATCCTATTGCCAGCGGAACAACACCTGGTAACAGGTGCCTCTGGGGCCAAAAGCCAAGGTTTAAACAAACCTTT  
TAGGATTTGGTTCTAAACCTGAGATGTTGTGGAAGATACTTAGTACCTACCGAAGTGGTAGTAGGGCAAAAACCAGTTGAA  
AGGGCCACGAAGGAGGCCCA

>SRR2298573.93103 93103 length=500

CCAAGATAGAGGTACCTGGCCCCAGATCAGATCCATAGTGTGCTTGTACCTATGGGTACCTTCTGGGCATCCTTCGTG  
GGCCTTACAACCTAGTGTGTTGCACTACTACCAGATCGGTAGGTACTAAGTATCTTCCACAACATCTCAGGTTTGAACCAA  
TCTTAAAGGGTTTGTAAACCTTTGGCTTTTGGCCCCAGAGGCACCTGTTACCAGGTGTTGTTCCGCTGGCAATAGGAGGC  
TTTACAGCAAGGTGAGACGTCTGGTGACGTGTGGGAACTTATTGGAAACAACATTTTGTCTGTAAAGCATCCTATTGCCAG  
CGGAACAACACCTGGTAACAGGTGCCTCTGGGGCCAAAAGCCAAGGTTTAAACAAACCTTTAGGATTTGGTTCTAAACCTG  
AGATGTTGTGGAAGATACTTAGTACCTACCGATCTGGTAGTAGTGCAAACTAGTTGTAAGGCCCCGAAGGATGCCCCA  
GAAGGTACCCATAGGTAACA

>SRR2298573.59417 59417 length=500

TTAACAAACCTTTAGGATTTGGTTCTAAACCTGAGATGTTGTGGAAGATACTTAGTACCTACCGATCTGGTAGTAGTGCA  
AACACTAGTTGTAAGGCCACGAAGGATGCCAGAAGGTACCCATAGGTAACAAGCGACACTATGGATCTGATCTGGGGC  
CAGGTACCTCTATCTTGGTGATCTGGTTAAAAAACGTCCTAGTGGGCCAAAACCCGGGGGGGATCCCCGGTTTCCCTTTTATT  
TTATCAATGCGCAATACTCTTAATTTGCTCCATAGTGGCATTTGATAAAAATAAAAGGAAACCCGGGGATCCCCCGGGTTT  
GGCCCACTAGACGTTTTTTTAAACCAGATCACCAAGATAGAGGTACCTGGCCCCAGATCAGATCCATAGTGTGCTTGTGTTAC  
CTATGGGTACCTTCTGGGCATCCTTCGTGGGCCTTACAACCTAGTGTGTTGCACTACTACCAGACCGGTAGGACCTAAGAAAT  
CTTCCACAACATCCCAGGGT

>SRR2298573.13345 13345 length=500

CTAGTAAGTTTGTGAGACGTCTGGTGACGTGTGGGAACTTATTGGAAACAACATTTTGTCTGTAAAGCATCCTATTGCCAG  
CGGAACAACACCTGGTAACAGGTGCCTCTGGGGCCAAAAGCCAAGGTTTAAACAAACCTTTAGGATTTGGTTCTAAACCTG  
AGATGTTGTGGAAGATACTTAGTACCTACCGATCTGGTAGTAGTGCAAACTAGTTGTAAGGCCACGAAGGATGCCCCA  
AAAGGTACCTATGGGTACCTTCTGGGCATCCTTCGTGGGCCTTACAACCTAGTGTGTTGCACTACTACCAGATCGGTAGGT  
ACTAAGTATCTTCCACAACATCTCAGGTTTGAACCAATCTTAAAGGGTTTGTAAACCTTTGGCTTTTGGCCCCAGAGGC  
ACCTGTTACCAGGTGTTGTTCCGCTGGCAATAGGATGCTTTACAGCAAAATGTTGTTTCCAATAAGTTTCCACACGTCAC  
CAGACGTCTCCCAAACTTAC

>SRR2298546.925026 925026 length=502

CCAATATGGTAACATCAACTTGTGTAGCAGAACCTGAAGGTATGGATAAAGGTGTCCAAACATAGACTTTTTAGTTGCCCT  
AAGTCTGACGAATCTGTTTTAACATAGTTTGTGTGTCAGCAACATAGGGGATACATAAATCAGCCTGTGTGGTCTCAGCCAA  
ATTCATCAACACATGTGGTAAATTTGGTAAACGCTCCAAATTTCTAACTTTGAGTCATATGTCACAACAGGTTTGGGTTTCAT

ACACCACCAATGGGCTAGAGGACATCAGATAACCCATGTGGAACTACCAAAAAGTCTTTTGGGACAAAAACAGCAAGCCAG  
CCTATGGCCAATCAAGATACTTTGCAGCAGTACGGTGTGGTTTTTCATTTTCAAGTACAAGTGAATGTTAATCAAGGAACA  
GCCGGTAGTGCATTTGGTGGTGTATGAACCCAAAACCTGTTGTGACATATGACTCAAAGTTAGAATTTGGAGCGTTTACCAA  
TTTACCACATGTGTTGATGAAT

>SRR2298546.917017 917017 length=500

ATCAAGATACTTTGCAGCAGTACGGTGTGGTTTTTCATTTTCAAGTACAAGTGAATGTTAATCAAGGAACAGCCGGTAGTG  
CATTGGTGGTGTATGAACCCAAAACCTGTTGTGACATATGACTCAAAGTTAGAATTTGGAGCGTTTACCAATTTACCACAT  
GTGTTGATGAATTTGGCTGAGACCACACAGGCTGATTTATGTATCCCTATGTTGCTGACACAAAATATGTTAAAACAGA  
TTCGTCAGAATATGGTAACATCAACTTGTGTAGCAGAACCTGAAGGTATGGATAAAAGGTGTCCAAACATAGACTTTTGTAGT  
TGCCCTAAGTCTGACGAATCTGTTTTAACATAGTTTGTGTGACGAACATAGGGGATACATAAATCAGCCTGTGTGGTCTC  
AGCCAAATTCATCAACACATGTGGTAAATTTGGTAAACGCTCCAAATTTCTAACTTTGAGTCATATGTCACAACAGGTTTGG  
GTTTCATACACCACCAATGCA

>SRR2298546.733295 733295 length=502

CATAAATACCAACGCTTTGACCGAATACCCTAGGATTTTTGGAAGTCCAATTTGCAATAAGCTACCCAATATGGTAAACATCA  
ACTTGTGTAGCAGAACCTGAAGGTATGGATAAAAGGTGTCCAAACATAGACTTTTGTAGTTGCCCTAAGTCTGACGAATCTGT  
TTTAAACATAGTTTGTGTGACGAACATAGGGGATACATAAATCAGCCTGTGTGGTCTCAGCCAAATTCATCAACACATGTG  
GTAAATTTGGTAGCCGGTAGTGCATTTGGTGGTGTATGAACCCAAAACCTGTTGTGACATATGACTCAAAGTTAGAATTTGGA  
GCGTTTACCAATTTACCACATGTGTTGATGAATTTGGCTGAGACCACACAGGCTGATTTATGTATCCCTATGTTGCTGA  
CACAACTATGTTAAAACAGATTCGTCAGACTTAGGGCAACTAAAAGTCTATGTTTGGACACCTTTATCCATACCTTCAG  
GTTCTGCTACACAAGTTGATGT

>SRR2298546.572666 572666 length=502

ACCCAATATGGTAAACATCAACTTGTGTAGCAGAACCTGAAGGTATGGATAAAAGGTGTCCAAACATAGACTTTTGTAGTTGCC  
CTAAGTCTGACGAATCTGTTTTAACATAGTTTGTGTGACGAACATAGGGGATACATAAATCAGCCTGTGTGGTCTCAGCC  
AAATTCATCAACACATGTGGTAAATTTGGTAAACGCTCCAAATTTCTAACTTTGAGTCATATGTCACAACAGGTTTGGGTT  
ATACACCACCAACGCTGTGGTTTTTCATTTTCAAGTACAAGTGAATGTTAATCAAGGAACAGCCGGTAGTGCATTTGGTGGT  
GTATGAACCCAAAACCTGTTGTGACATATGACTCAAAGTTAGAATTTGGAGCGTTTACCAATTTACCACATGTGTTGATGA  
ATTTGGCTGAGACCACACAGGCTGATTTATGTATACCCTATGTTGCTGACACAAAATATGTTAAAACAGATTCGTCAGAC  
TTAGGGCAACTAAAAGTCTATG

>SRR2298546.570152 570152 length=501

ATGTCAATTTTTCCCTAGTCCACTTGTATTTAGTGCTCATTTGTAAGAAATTTCTTAAAGATTTTGGCTCCGCGTTGGTGC  
ATTGTCATAAATACCAACGCTTTGACCGAATACCCTAGGATTTTTGGAAGTCCAATTTGCAATAAGCTACCCAATATGGTAA  
CATCAACTTGTGTAGCAGAACCTGAAGGTATGGATAAAAGGTGTCCAAACATAGACTTTTGTAGTTGCCCTAAGTCTGACGAA  
TCTGTTTTAATTTGGTGGTGTATGAACCCAAAACCTGTTGTGACATATGACTCAAAGTTAGAATTTGGAGCGTTTACCAAT  
TACCACATGTGTTGATGAATTTGGCTGAGACCACACAGGCTGATTTATGTATCCCTATGTTGCTGACACAAAATATGTT  
AAAACAGATTCGTCAGACTTAGGGCAACTAAAAGTCTATGTTTGGACACCTTTATCCATACCTTCAGGTTCTGCTACACA  
AGTTGATGTTACCATATTTGG

>SRR2298546.467110 467110 length=502

TCAAGATACTTTGCAGCAGTACGGTGTGGTTTTTCATTTTCAAGTACAAGTGAATGTTAATCAAGGAACAGCCGGTAGTGC  
ATTGGTGGTGTATGAACCCAAAACCTGTTGTGACATATGACTCAAAGTTAGAATTTGGAGCGTTTACCAATTTACCACATG  
GTTGATGAATTTGGCTGAGACCACACAGGCTGATTTATGTATCCCTATGTTGCTGACACAAAATATGTTAAAACAGAT  
TCGTCAGACTTACCCAATATGGTAAACATCAACTTGTGTAGCAGAACCTGAAGGTATGGATAAAAGGTGTCCAAACATAGAC  
TTTTAGTTGCCCTAAGTCTGACGAATCTGTTTTAACATAGTTTGTGTGACGAACATAGGGGATACATAAATCAGCCTGTG  
TGGTCTCAGCCAAATTCATCAACACATGTGGTAAATTTGGTAAACGCTCCAAATTTCTAACTTTGAGTCATATGTCACAACA  
GGTTTGGGTTTCATACACCACCA

>SRR2298546.362559 362559 length=502

GTCATAAATACCAACATCTTGACCGAATACCCTAGGATTTTTGGAAGTCCAATTTGCAATAAGCTACCCAATATGGTAAACAT  
CAACTTGTGTAGCAGAACCTGAAGGTATGGATAAAAGGTGTCCAAACATAGACTTTTGTAGTTGCCCTAAGTCTGACGAATCT  
GTTTTAACATAGTTTGTGTGACGAACATAGGGGATACATAAATCAGCCTGTGTGGTCTCAGCCAAATTCATCAACACATG  
TGGTAAATTTGGCATTGGTGGTGTATGAACCCAAAACCTGTTGTGACATATGACTCAAAGTTAGAATTTGGAGCGTTTACCA  
ATTTACCACATGTGTTGATGAATTTGGCTGAGACCACACAGGCTGATTTATGTATCCCTATGTTGCTGACACAAAATAT  
GTTAAAACAGATTCGTCAGACTTAGGGCAACTAAAAGTCTATGTTTGGACACCTTTATCCATACCTTCAGGTTCTGCTAC  
ACAAGTTGATGTTACCATATTTG

>SRR2298546.103054 103054 length=502

CTGCAGTACGGTGTGGTTTTTCATTTTCAAGTACAAGTGAATGTTAATCAAGGAACAGCCGGTAGTGCATTTGGTGGTGTAT  
GAACCCAAAACCTGTTGTGACATATGACTCAAAGTTAGAATTTGGAGCGTTTACCAATTTACCACATGTGTTGATGAATTT  
GGCTGAGACCACACAGGCTGATTTATGTATCCCTATGTTGCTGACACAAAATATGTTAAAACAGATTCGTCAGACTTAG  
GGCAACTAAAACCTGAAGGTATGGATAAAAGGTGTCCAAACATAGACTTTTGTAGTTGCCCTAAGTCTGACGAATCTGTTTT  
AACATAGTTTGTGTGACGAACATAGGGGATACATAAATCAGCCTGTGTGGTCTCAGCCAAATTCATCAACACATGTGGTA  
AATTTGGTAAACGCTCCAAATTTCTAACTTTGAGTCATATGTCACAACAGGTTTGGGTTTCATACACCACCAATGCACTACCG

GCTGTTCCCTTGATTAACATTCA  
>SRR2298578.1030338 1030338 length=500  
GGTGACGTGTGGGAACTTATTGGAAACAACATTTTGTCTGTAAGCATCCTATTGCCAGCGGAACAACACCTGGTAACAGG  
TGCCCTCTGGGGCCAAAAGCCAAGGTTTAAACAAACCCCTTTAGGATTGGTTCTAAACCTGAGATGTTGTAGAAAGATACTTAG  
TACCTACCGATCTGGTAGTAGTGCAAACTAGTTGTAAAGGCCACGAAGGATGCCAGAAAGGTACCCATAGGTAACAAG  
CGACTACTAGGATCCATAGTGTGCTTGTACCTATGGGTACCTTCTGGGCATCCTTCGTGGGCCTTACAACACTAGTGT  
GCTACTACCAGATCGGTAGGTACTAAGTATCTTCTACAACATCTCAGGTTTAGAACCAATCCTAAAGGGTTTGTAAA  
CCTTGGCTTTTGGCCCCAGAGGCACCTGTTACCAGGTGTTGTTCCGCTGGCAATAGGATGCTTTACACCAAAAATGTTGTT  
TCCACTAAGTTCACCACGC  
>SRR2298578.535032 535032 length=500  
ACCCAATATGGTTACATCAACTTGTGTAGCAGAACCTGAAGGTATGGATAAAGGTGTCCAAACATAGACTTTTTAGTTGCC  
CTAAGTCTGACGAATCTGTTTTAACATAGTTTGTGTGTCAGCAACATAGGGGATACATAAATCAGCCTGTGTGGTCTCAGCC  
AAATTCATCAACACATGTGGTAGATTGGTAAATGCTCCAAATTTCTAACTTTGAGTCATATGTCACAACGGGTTTGGGTT  
ATACACCACCAGGAACAGCTGGTAGTGCATTTGGTGGTGTATGAACCCAAACCCGTTGTGACATATGACTCAAAGTTAGAA  
TTTGGAGCATTTACCAATCTACCACATGTGTGATGAATTTGGCTGAGACCACACAGGCTGATTTATGTATCCCTATGT  
TGCTGACACAAAACATGTTAAAACAGATTGCTCAGACTTAGGGTAACTAAAAGCCAATGTTTGGCAACCTTTATCCATAC  
CTTCAGGTTTTGCTACACAG  
>SRR2298573.869794 869794 length=500  
CCTATTGCCAGCGGAACAACACCTGGTAAACAGGTGCCCTCTGGGGCCAAAAGCCAAGGTTTAAACAAACCCCTTTAGGATTGG  
TTCTAAAACCTGAGATGTTGTGGAAAGATACTTAGTACCTACCGATCTGGTAGTAGTGCAAACTAGTTGTAAGGCCACG  
AAGGATGCCAGAAAGGTACCCATAGGTAACAAGCGACTATGGATCTGATCTGGGGCCAGGTACCTCTATCTTGGGGAT  
CTGGTTAAAAATCTTCCACTCTCTCATTAACACTACATTTGATAGTGGAACTCAACTGAACTGACCCTCCGGTCCCATATCT  
GCAATACTCTTAATTTGTCTCCATAGTGGCATTGATAAAAATAAAAGGAAACCGGGGATCCCCCGGGTTTGGCCACTAG  
ACGTTTTTTAACAGATCACAAGATAGAGGTACCTGGCCCCAGATCAGATCCAAAGGGTCGTTGTTACCTATGGGGAC  
CTCCGGGGCACCTCTGGGG  
>SRR2298573.825070 825070 length=500  
CTTGTGGACCTTATGCTCACACAGCCATCCTCTAGTAAGTTTGTGAGACGTCTGGTGACGTGTGGGAACTTATTGGAAAC  
AACATTTTTGCTGTAAAGCATCCTATTGCCAGCGGAACAACACCTGGTAAACAGGTGCCCTCTGGGGCCAAAAGCCAAGGTTT  
AACAAAACCCCTTTAGGATTGGTTCTAAAACCTGAGATGTTGTGGAAAGAACTTAGAACCAACCGACCTGGAAAGAGTGCAAA  
CACAAAGTTCGCAACTAGTGTTTGCACTACTACCAGATCGGTAGGTACTAAGTATCTTCCACAACATCTCAGGTTTAGAAC  
CAATCCTAAAGGGTTTGTAAACCTTGGCTTTTGGCCCCAGAGGCACCTGTTACCAGGTGTTGTTCCGCTGGCAATAGGA  
TGCTTTACAGCAAAAATGTTGTTTCCAATAAGTTCCACACGTCACCAGACGTCACAAACTTACTAGAGGATGGCTGTG  
TGAGCATAAGGTCCACAAC  
>SRR2298573.781063 781063 length=500  
CTTAATTGTCTCCATAGTGGCATTGATAAAAATAAAAGGAAACCGGGGATCCCCCGGGTTTGGCCACTAGACGTTTTTT  
TAACCAGATCACAAGATAGAGGTACCTGGCCCCAGATCAGATCCATAGTGTGCTTGTACCTATGGGTACCTTCTGGG  
CATCCTTCGTGGGCCTTACAACACTAGTGTTTGCACTACTACCAGATCGGAAGGTACTAAGAACTTCCACAACACCTCAGG  
TTTAGAACACCCTTTAGGATTGGTTCTAAAACCTGAGATGTTGTGGAAAGATACTTAGTACCTACCGATCTGGTAGTAGTG  
CAAACTAGTTGTAAGGCCACGAAGGATGCCAGAAAGGTACCCATAGGTAACAAGCGACTATGGATCTGATCTGGG  
GCCAGGTACCTCTATCTTGGTGTATCTGGTTAAAAAACGTTAGTGGGCCAAAACCGGGGGGATCCCCGGTTTCTTTTA  
TTTTATCAATGCCACAATGG  
>SRR2298573.780853 780853 length=500  
AATAAAAGGAAACCGGGGATCCCCCGGGTTTGGCCACTAGACGTTTTTTTAAACAGATCACAAGATAGAGGTACCTG  
GCCCCAGATCAGATCCATAGTGTGCTTGTACCTATGGGTACCTTCTGGGCATCCTTCGTGGGCCTTACAACACTAGTGT  
TGCACTACTACCAGATCGGTAGGTACTAAGTATCTTCCACAACATCTCAGGTTTAGAACCAATCCTAAAGGGTTTGTAA  
ACCTTGGCTTTAACAGGTGCCCTCTGGGGCCAAAAGCCAAGGTTTAAACAAACCCCTTTAGGATTGGTTCTAAAACCTGAGATG  
TTGTGGAAAGATACTTAGTACCTACCGATCTGGTAGTAGTGCAAACTAGTTGTAAGGCCACGAAGGATGCCAGAAAGG  
TACCCATAGGTAACAAGCGACTATGGATCTGATCTGGGGCCAGGTACCTCTATCTTGGGGATCTGGTTAAAAAACGTC  
TAGTGGGCCAAAACCGGGG  
>SRR2298573.769703 769703 length=500  
GTTCCGGATCTATTAGTGAGATACCATGCTTGTGGACCTTATGCTCACACAGCCATCCTCTAGTAAGTTTGTGAGACGTC  
TGTTGACGTGTGGGAACTTATTGGAAACAACATTTTGTCTGTAAGCATCCTATTGCCAGCGGAACAACACCTGGTAAACAG  
GTGCCCTCTGGGGCCAAAAGCCAAGGTTTAAACAAACCCCTTTAGGATTGGTTCTAAAACCTGAGATGTTGTGGAAAGAACTTA  
GTACCTACCGGGTACCTTCTGGGCATCCTTCGTGGGCCTTACAACACTAGTGTTTGCACTACTACCAGATCGGTAGGTACTA  
AGTATCTTCCACAACATCTCAGGTTTAGAACCAATCCTAAAGGGTTTGTAAACCTTGGCTTTTGGCCCCAGAGGCACCT  
GTTACCAGGTGTTGTTCCGCTGGCAATAGGATGCTTTACAGCAAAAATGTTGTTTCCAATAAGTTCCCAAAACGTCACCAGA  
CGTCTCACAAACTTACTAGG  
>SRR2298573.746679 746679 length=500  
GGCGTCCGCTGTTTGTGAGACGTCTGGTGACGTGTGGGAACTTATTGGAAACAACATTTTGTCTGTAAGCATCCTATTGC

CAGCGGAACAACACCTGGTAAACAGGTGCCTCTGGGGCCAAAAGCCAAGGTTTAAACAAACCCTTTAGGATTGGTTCTAAAC  
CTGAGATGTTGTGGAAGATACTTAGTACCTACCGATCTGGTAGTAGTGCAAACTAGTGTGTAAGGCCACGAAGGATGC  
CCAGAAGGGAACTTATGGGTACCTTCTGGGCATCCTTCGTGGGCCCTTACAACACTAGTGTGTTGCACTACTACCAGATCGGTA  
GGTACTAAGTATCTTCCACAACATCTCAGGTTTAGAACCAATCCTAAAGGGTTTGTAAACCTTTGGCTTTTGGCCCCAGA  
GGCACCTGTTACCAGGTGTTGTTCCGCTGGCAATAGGATGCTTTACAGCAAAAATGTTGTTTCCAATAAGTTCCACACGT  
CACCAGACGTCTCACAAAA

>SRR2298573.740334 740334 length=500

TTTTTAACCAGATCACCAGATAGAGGTACCTGGCCCCAGATCAGATCCATAGTGTGCTTGTACCTATGGGTACCTTC  
TGGGCATCCTTCGTGGGCCCTTACAACACTAGTGTGTTGCACTACTACCAGATCGGTAGGTACTAAGTATCTTCCACAACATCT  
CAGGTTTAGAACCAATCCTAAAGGGTTTGTAAACCTTTGGCTTTTGGCCCCAGAGGCACCTGTTACCAGGGGTTGTTCCG  
CTGGCAATAGGGCGTCCGCTGGAGTTTGTGAGACGTCTGGTGACGTGTGGGAACTTATTGGAAAACAACATTTTGTCTGTAA  
AGCATCCTATTGCCAGCGGAACAACACCTGGTAAACAGGTGCCTCTGGGGCCAAAAGCCAAGGTTTAAACAAACCCTTTAGG  
ATTGGTTCTAAACCTGAGATGTTGTGGAAGATACTTAGTACCTACCGATCTGGTGTAGGGCAAAACACAAGTTGTAAGGC  
CCCCGCAGGATGCCAGAAG

>SRR2298573.710464 710464 length=500

AACAAACCCTTTAGGATTGGTTCTAAACCTGAGATGTTGTGGAAGATACTTAGTACCTACCGATCTGGTAGTAGTGCAAA  
CACTAGTTGTAAGGCCACGAAGGATGCCAGAAGGTACCCATAGGTAACAAGCGACACTATGGATCTGATCTGGGGCCA  
GGTACCTCTATCTTGGTGATCTGGTTAAAAAACGCTCTAGTGGGCCAAAACCCGGGGGGATCCCCGGTTTTCTTTTTATTTTT  
ATCAATGCCCTCTTAATTGTCTCCATAGTGGCATTTGATAAAAAATAAAGGAAAACCGGGGATCCCCCGGGTTTGGCCCCA  
CTAGACGTTTTTTAAACCAGATCACCAGATAGAGGTACCTGGCCCCAGATCAGATCCATAGTGTGCTTGTACCTATGG  
GTACCTTCTGGGCATCCTTCGTGGGCCCTTACAACACTAGTGTGTTGCACTACTACCAAAATCGGAAGGACCTAAGAACCCTTCCC  
CAACATCTCAGGTTTAGAAC

>SRR2298573.706510 706510 length=500

CTATTAGTGAGATAACCATGCTTGTGGACCTTATGCTCACACAGCCATCCTCTAGTAAGTTTGTGAGACGTCTGGTGACGT  
GTGGGAACCTTATTGGAACAACATTTTGTCTGTAAGCATCCTATTGCCAGCGGAACAACACCTGGTAACAGGTGCCTCTG  
GGCCAAAAGCCAAGGTTTAAACAAACCCTTTAGGATTGGTTCTAAACCTGAGATGTTGTGGAAGATACTTAGTACCTACC  
GATCTGGTAGCTACTACCAGATCGGTAGGTACTAAGTATCTTCCACAACATCTCAGGTTTAGAACCAATCCTAAAGGGTT  
TGTTAAACCTTTGGCTTTTTGTCCCCAGAGGCACCTGTTACCAGGTGTTGTTCCGCTGGCAATAGGATGCTTTACAGCAAAA  
TGTTGTTTCCAATAAGTTTCCACACGTACCAGACGTCTCACAAACTTACTAGAGGATGGCTTGGGGAGCATAAGGTCCA  
CCAGCATGGGATTTCCCTAA

>SRR2298573.647887 647887 length=500

TCTGGGGCCAAAAGCCAAGGTTTAAACAAACCCTTTAGGATTGGTTCTAAACCTGAGATGTTGTGGAAGATACTTAGTACC  
TACCGATCTGGTAGTAGTGCAAACTAGTTGTAAGGCCACGAAGGATGCCAGAAGGTACCCATAGGTAACAAGCGAC  
ACTATGGATCTGATCTGGGGCCAGGTACCTCTATCTTGGTGAACCTGGTTAAAAAACGCTCTAGTGGGCCAAAACCCGGGGG  
GATCCCCGGTCTCCGGTCCGCATATCTGCAATACTCTTAATTGTCTCCATAGTGGCATTGATAAAAATAAAGGAAACCGG  
GGATCCCCCGGGTTTTGGCCACTAGACGTTTTTTAAACCAGATCACCAGATAGAGGTACCTGGCCCCAGATCAGATCC  
CTAGTGTGCTTGTACCTATGGGTACCTTCTGGGCATCCTTCGTGGGCCCTTAAAACTAGGGTTTTGCCCTACTACCAGAC  
CGGTAGGAACTAAGTATCTC

>SRR2298573.588383 588383 length=500

CGGGGATCCCCCGGGTTTTGGCCACTAGACGTTTTTTAAACCAGATCACCAGATAGAGGTACCTGGCCCCAGATCAGA  
TCCATAGTGTGCTTGTACCTATGGGTACCTTCTGGGCATCCTTCGTGGGCCCTTACAACACTAGTGTGTTGCACTACTACCA  
GATCGGTAGGTACTAAGTATCTTCCACAACATCTCAGGTTTAGAACCAATCCTAAAGGGTTTGTAAACCTTTGGCTTTTG  
GCCCCAGAGGCTTATTGGAACAACATTTTGTCTGTAAGCATCCTATTGCCAGCGGAACAACACCTGGTAACAGGTGCCT  
CTGGGGCCAAAAGCCAAGGTTTAAACAAACCCTTTAGGATTGGTTCTAAACCTGAGATGTTGTGGAAGATACTTAGTACCT  
ACCGATCTGGTAGTAGTGCAAACTAGTTGTAAGGCCACGAAGGATGCCAGAAGGAACCAAAAAGGAAAAAACGACA  
CAATGGATCTGATCTGGGGC

>SRR2298573.550702 550702 length=500

CTTGTACCTATGGGTACCTTCTGGGCATCCTTCGTGGGCCCTTACAACACTAGTGTGTTGCACTACTACCAGATCGGTAGGTA  
CTAAGTATCTTCCACAACATCTCAGGTTTAGAACCAATCCTAAAGGGTTTGTAAACCTTTGGCTTTTGGCCCCAGAGGCA  
CCTGTTACCAGGCGTTGTTCCGCTGGCAATAGGATGCTTTACAGCAAAAATGTTGTTTCCAATAAGTTCCACACGTCACC  
AGACGTCTCACGCTGAATGTTGTGAGACGTCTGGTGACGTGTGGGAACTTATTGGAAAACAACATTTTGTCTGTAAAGCATC  
CTATTGCCAGCGGAACAACACCTGGTAACAGGTGCCTCTGGGGCCAAAAGCCAAGGTTTAAACAAACCCTTTAGGATTGGT  
TCTAAACCTGAGATGTTGTGGAAGAAAACCTTGAACCTACCGATCTGGTAGCAGTGCAAAACACAGGTGGTAAGGCCACGA  
AGGATGCCAGAAGGGCCCC

>SRR2298573.529564 529564 length=500

GATCAGATCCATAGTGTGCTTGTACCTATGGGTACCTTCTGGGCATCCTTCGTGGGCCCTTACAACACTAGTGTGTTGCACT  
ACTACCAGATCGGTAGGTACTAAGTATCTTCCACAACATCTCAGGTTTAGAACCAATCCTAAAGGGTTTTGTTAAACCTTG  
GCTTTTGGCCCCAGAGGCACCTGTTACCAGGTGTTGTTCCGCTGGCAATAGGATGCTTTACAGCAAAAATGTTGTTTCCAA  
TAAGTTCCCACCTTATGCTCACACAGCCATCCTCTAGTAAGTTTGTGAGACGTCTGGTGACGTGTGGGAACTTATTGGAA

ACAACATTTTGTCTGTAAAGCATCCTATTGCCAGCGGAACAACACCTGGTAAACAGGTGCCTCTGGGGCCAAAAGCCAAGGT  
TTAACAAACCCCTTTAGGATTGGTTCTAAACCTGAGATGTTGGGGAAAGATACTTAGTACCTACCGATCTGGTAGTAGGGCA  
AACAAACAGGTGTAAGGCCCA

>SRR2298573.498005 498005 length=500

GATCAGATCCATAGTGTGCTTGTACCTATGGGTACCTTCTGGGCATCCTTCGTGGGCCTTACAACACTAGTGTTCCTGCACT  
ACTACCAGATCGGTAGGTACTAAGTATCTTCCACAACATCTCAGGTTTAGAACCAATCTTAAAGGGTTTGTAAACCTTG  
GCTTTTGGCCCCAGAGGCACCTGTTACCAGGTGTTGTTCCGCTGGCAATAGGATGCTTTACAGCAAAATGTTGTTTCCAA  
TAAGTTCCACGCTGGAAGTTTGTGAGACGCTCTGGCGACGTGTGGGAACCTTATTGGAAACAACATTTTGGCTGTAAAGCAT  
CCTATTGCCAGCGGAACAACACCTGGTAAACAGGTGCCTCTGGGGCCAAAAGCCAAGGTTTAACAAACCCCTTTAGGATTGG  
TTCTAAACCTGAGATGTTGTGGAAGATACTTAGTACCTACCGATCTGGTAGTAGGGCAAAAACACTAGTTGAAAGGCCCCCG  
AAGGAGGCCAAAAGGAACC

>SRR2298573.468266 468266 length=500

CAACTGAACTGACCACTCCGGTCGCCATATCTGCAATACTCTTAATTGTCTCCATAGTGGCATTGATAAAAATAAAAGGAA  
ACCGGGGATCCCCCGGGTTTGGCCACTAGACGTTTTTTTAAACCAGATCACCAAGATAGAGGTACCTGGCCCCAGATCA  
GATCCATAGTGTGCTTGTACCTATGGGTACCTTCTGGGCATCCTTCGTGGGCCTTACAACAAGTGTTCCTGCACTACTAC  
CAGATCGGTGAACAAACCCCTTTAGGATTGGTTCTAAACCTGAGATGTTGTGGAAGATACTTAGTACCTACCGATCTGGTA  
GTAGTGCAAACTAGTTGTAAGGCCACGAAGGATGCCAGAAGGTACCCATAGGTAACAAGCGACACTATGGATCTGA  
TCTGGGGCCAGGTACCTCTATCTTGGTGATCTGGTTAAAAAACGCTCTAGTGGGCCAAAACCCGGGGGGGATCCCCGGTTTC  
CTTTTATTTTATCAATGCC

>SRR2298573.423667 423667 length=500

ACATTTTGTCTGTAAAGCATCCTATTGCCAGCGGAACAACACCTGGTAAACAGGTGCCTCTGGGGCCAAAAGCCAAGGTTTA  
ACAAACCCCTTTAGGATTGGTTCTAAACCTGAGATGTTGTGGAAGATACTTAGTACCTACCGATCTGGTAGTAGTGCAAAAC  
ACTAGTTGTAAGGCCACGAAGGATGCCAGAAGGTACCCATAGGTAACAAGCGACACAATGGATCTGATCTGGGGCCAG  
GTACCTCTATCAACTGAACTGACCACTCCGGTCGCCATATCTGCAATACTCTTAATTGTCTCCATAGTGGCATTGATAAA  
ATAAAAGGAAACCGGGGATCCCCCGGGTTTGGCCACTAGACGTTTTTTTAAACCAGATCACCAAGATAGAGGTACCTGG  
CCCCAGATAAAAATCCATAGTGTGCTTGTACCTATGGGTACCTTCTGGGCAACCTTCTTGGGCCCTACCAACTAGGGTTT  
GCACTACTCCCAGATCGGTG

>SRR2298573.403271 403271 length=500

CCAAGATAGAGGTACCTGGCCCCAGATCAGATCCATAGTGTGCTTGTACCTATGGGTACCTTCTGGGCATCCTTCGTG  
GGCCTTACAACACTAGTGTTCCTGCACTACTACCAGATCGGTAGGTACTAAGTATCTTCCACAACATCTCAGGTTTAGAACCA  
TCCTAAAGGGTTTGTAAACCTTGGCTTTTGGCCCCAGAGGCACCTGTTACCAGGTGTTGTTCCGCTGGCAATAGGATGC  
TTTACAGCTGCTGTAAAGCATCCTATTGCCAGCGGAACAACACCTGGTAAACAGGTGCCTCTGGGGCCAAAAGCCAAGGTT  
TAACAAACCCCTTTAGGATTGGTTCTAAACCTGAGATGTTGTGGAAGATACTTAGTACCTACCGATCTGGTAGTAGTGCAA  
ACACTAGTTGTAAGGCCACGAAGGATGCCAGAAGGTACCCATAGGTAACAAGCGACCAATGGATCGGACCTGGGGCC  
AGGGACCCCTATCTTGGCGG

>SRR2298573.379421 379421 length=500

CTAGTAAAGTTTGTGAGACGCTCTGGTGACGTGTGGGAACTTATTGGAAACAACATTTTGTCTGTAAAGCATCCTATTGCCAG  
CGGAACAACACCTGGTAAACAGGTGCCTCTGGGGCCAAAAGCCAAGGTTTAAACAAACCCCTTTAGGATTGGTTCTAAACCTG  
AGATGTTGTGGAAGATACTTAGTACCTACCGATCTGGTAGTAGTGCAAAACACTAGTTGTAAGGCCACGAAGGAGGCCCA  
GAAGGTACCCAGATAGAGGTACCTGGCCCCAGATCAGATCCATAGTGTGCTTGTACCTATGGGTACCTTCTGGGCATC  
CTTCGTGGGCCTTACAACACTAGTGTTCCTGCACTACTACCAGATCGGTAGGTACTAAGTATCTTCCACAACATCTCAGGTTTA  
GAACCAATCTTAAAGGGTTTGTAAACCTTGGCTTTTGGCCCCAGAGGCACCTGTTACCAGGCGTAGTTCCTGCTGGCAAA  
AGGATGCTTTACAGCAAAAAG

>SRR2298573.374775 374775 length=500

GCCAAAAGCCAAGGTTTAAACAAACCCCTTTAGGATTGGTTCTAAACCTGAGATGTTGTGGAAGATACTTAGTACCTACCGA  
TCTGGTAGTAGTGCAAAACACTAGTTGTAAGGCCACGAAGGATGCCAGAAGGTACCCATAGGTAACAAGCGACACTATG  
GATCTGATCTGGGGCCAGGTACCTCTATCTTGGTGATCTGGTTAAAAAACGCTCTAGTGGGCCAAAACCCGGGGGGGATCCC  
CGGTTTCCCTTTATCTGCAATACTCTTAATTGTCTCCATAGTGGCATTTGATAAAAATAAAAGGAAACCGGGGATCCCCCGG  
GGTTTGGCCACTAGACGTTTTTTTAAACCAGATCACCAAGATAGAGGTACCTGGCCCCAGATCAGATCCATAGTGGCGCTT  
GTTACCTATGGGTACCTTCTGGGCATCCTTCGTGGGCCTTACAACACTAGTGTTCCTGCACTACTACCAAAACCGGTAGGACTTA  
AGAATCTTCCAAACATCCC

>SRR2298573.349802 349802 length=500

TACCTATGGGTACCTTCTGGGCATCCTTCGTGGGCCTTACAACACTAGTGTTCCTGCACTACTACCAGATCGGTAGGTACTAAG  
TATCTTCCACAACATCTCAGGTTTAGAACCAATCTTAAAGGGTTTGTAAACCTTGGCTTTTGGCCCCAGAGGCACCTGT  
TACCAGGTGTTGTTCCGCTGGCAATAGGATGCTTTACAGCAAAATGTTGTTTCCAATAAGTTCCCACACGTCACCAGACG  
TCTCACAAGCGCTCACACAGCCATCCTCTAGTAAGCTTGTGAGACGCTCTGGTGACGTGTGGGAACCTTATTGGAAACAACA  
TTTTGCTGTAAAGCATCCTATTGCCAGCGGAACAACACCTGGTAAACAGGTGCCTCTGGGGCCAAAAGCCAAGGTTTAAACA  
AACCCCTTTAGGATTGGTTCTAAACCTGAGATGTTGTGGAAGATACTTAAACCTACCGATCTGGTAGTAGGGCAAAACACC  
TGGTGTAAGGCCCCCGAAGG

>SRR2298573.317178 317178 length=500  
GGCATTGATAAAAAATAAAAGGAAAACCGGGGATCCCCCGGGTTTGGCCCACTAGACGTTTTTTAACCAGATCACCAAGAT  
AGAGGTACCTGGCCCCAGATCAGATCCATAGTGTGCTTGTACCTATGGGTACCTTCTGGGCATCCTTCGTGGGCCCTTA  
CAACTAGTGTTCGACTACTACCAGATCGGTAGGTACTAAGTATCTTCCCAACATCTCAGGTTTAGAACCAATCCTAAA  
GGGTTTGTGTAACAACACCTGGTAACAGGTGCCTCTGGGGCCAAAAGCCAAGGTTTAAACAAACCTTTAGGATTGGTTC  
TAAACCTGAGATGTTGTGGAAGATACTTAGTACCTACCGATCTGGTAGTAGTGCAAACACTAGTTGTAAGTCCCACGAAG  
GATGCCAGAAAGGAACCCATAGGTAAAAAGCAACACTATGGACCTGACCTGGGGCCAGGGACCCCTATCTTGGTGTCTTG  
GTTAAAAAACGCCTAGTGGG

>SRR2298573.316987 316987 length=500  
GTTTGTGAGACGTCTGGTGACGTGTGGGAACCTTATTGGAAAACAACATTTTGTCTGTAAAGCATCCTATTGCCAGCGGAACA  
ACACCTGGTAACAGGTGCCTCTGGGGCCAAAAGCCAAGGTTTAAACAAACCTTTAGGATTGGTTCTAAACCTGAGATGTT  
GTGGAAGATACTTAGTACCTACCGATCTGGTAGTAGTGCAAACACTAGTTGTAAGGCCACGAAGGATGCCAGAAAGGTA  
CCCATAGGGAGATCCATAGTGTGCTTGTACCTATGGGTACCTTCTGGGCATCCTTCGTGGGCCCTTACAACCTAGTGTTC  
GCACTACTACCAGATCGGTAGGTACTAAGTATCTTCCACAACATCTCAGGTTTAGAACCAATCCTAAAGGGTTTGTAA  
CCTTGGCTTTTGGCCCCAGAGGCACCTGTTACCAGGCGTTGTTCCGCTGGCAATAGGATGCTTTACAGCAAAAATGTTGTT  
TCCAATAAGTTCCACACGC

>SRR2298573.312469 312469 length=500  
TTTGTGAGACGTCTGGTGACGTGTGGGAACCTTATTGGAAAACAACATTTTGTCTGTAAAGCATCCTATTGCCAGCGGAACAA  
CACCTGGTAACAGGTGCCTCTGGGGCCAAAAGCCAAGGTTTAAACAAACCTTTAGGATTGGTTCTAAACCTGAGATGTTG  
TGGAAGATACTTAGTACCTACCGATCTGGTAGTAGTGCAAACACTAGTTGTAAGGCCACGAAGGATGCCAGAAAGGTA  
CCATAGGAAAACCAAGATAGAGGTACCTGGCCCCAGATCAGATCCATAGTGTGCTTGTACCTATGGGTACCTTCTGGGC  
ATCCTTCGTGGGCCTTACAACCTAGTGTTCGACTACTACCAGATCGGTAGGTACTAAGTATCTTCCACAACATCTCAGGT  
TTAGAACCAATCCTAAAGGGTTTGTAAACCTTTGGCTTTTGGCCCCAGAGGCACCTGTTACCAGGGGTTGTTCCGCCGGA  
CATAGGGAGCTTTACCGCAA

>SRR2298573.312255 312255 length=500  
GCTGTAAAGCATCCTATTGCCAGCGGAACAACACCTGGTAACAGGTGCCTCTGGGGCCAAAAGCCAAGGTTTAAACAAAC  
CTTTAGGATTGGTTCTAAACCTGAGATGTTGTGGAAGATACTTAGTACCTACCGATCTGGTAGTAGTGCAAACACTAGTT  
GTAAGGCCACGAAGGATGCCAGAAAGGTACCCATAGGTAACAAGCGACACAATGGATCTGATCTGGGGCCAGGTACCTC  
TATCTTGGTGAACAGATCACCAAGATAGAGGTACCTGGCCCCAGATCAGATCCATAGTGTGCTTGTACCTATGGGTA  
CCTTCTGGGCATCCTTCGTGGGCCTTACAACCTAGTGTTCGACTACTACCAGATCGGTAGGTACTAAGTATCTTCCACAA  
CATCTCAGGTTTAGAACCAATCCTAAAGGGTTTGTAAACCTTTGGCTTTTGGCCCCAGAGGCACCTGTTACCAGGGGTTG  
TTCCGCTGGCAAAAAGGAGGC

>SRR2298573.293391 293391 length=500  
ATTGGAAAACAACATTTTGTCTGTAAAGCATCCTATTGCCAGCGGAACAACACCTGGTAACAGGTGCCTCTGGGGCCAAAAG  
CCAAGGTTTAAACAAACCTTTAGGATTGGTTCTAAACCTGAGATGTTGTGGAAGATACTTAGTACCTACCGATCTGGTAG  
TAGTGCAAACACTAGTTGTAAGGCCACGAAGGATGCCAGAAAGGTACCCATAGGTAACAAGCGACACTATGGATCTGAT  
CTGGGGCCAGGACCCTCCGGTCGCCATATCTGCAATACTCTTAATTTGTCTCCATAGTGGCATTTGATAAAAAATAAAAGGAA  
ACCGGGGATCCCCCGGGTTTGGTCCACTAGACGTTTTTTAACCAGATCACCAAGATAGAGGTACCTGGCCCCAGATCA  
GATCCATAGGGTGCCTTGTACCTATGGGTACCTCCTGGGCATCCTTCGTGGGCCCTTCAAAACAAGGGTTGGCACTACAAC  
CAGTACGGTAGGGACAAGTA

>SRR2298573.278399 278399 length=500  
GTTTCGGGATCTATTAGTGAGATACCATGCTTGTGGACCTTATGCTCACACAGCCATCCTCTAGTAAGTTTGTGAGACGTC  
TGTTGACGTGTGGGAACCTTATTGGAAAACAACATTTTGTCTGTAAAGCATCCTATTGCCAGCGGAACAACACCTGGTAAACAG  
GTGCTCTGGGGCCAAAAGCCAAGGTTTAAACAAACCTTTAGGATTGGTTCTAAACCTGAGATGTTGTGGAAGATACTTA  
GTACCTACCGGGTACCTTCTGGGCATCCTTCGTGGGCCTTACAACCTAGTGTTCGACTACTACCAGATCGGTAGGTACTA  
AGTATCTTCCACAACATCTCAGGTTTAGAACCAATCCTAAAGGGTTTGTAAACCTTTGGCTTTTGGCCCCAGAGGCACCT  
GTTACCAGGGGTTGTTCCGCTGGCAATAGGATGCTTTACAGCAAAAATGTTGTTTCCAATAAGTTCCCACACGTCACCAGA  
CGTCTCACAAACTTACTAGG

>SRR2298573.240500 240500 length=500  
GGTTTGGCCCACTAGACGTTTTTTAACCAGATCACCAAGATAGAGGTACCTGGCCCCAGATCAGATCCATAGTGTGCTT  
GTTACCTATGGGTACCTTCTGGGCATCCTTCGTGGGCCTTACAACCTAGTGTTCGACTACTACCAGATCGGAAGGTACTA  
AGTATCTTCCACAACATCTCAGGTTTAAAACCAATCCTAAAGGGTTTGTAAACCTTTGGCTTTTGGCCCCAGAGGCACCT  
TTTACCAGGGCAACATTTTGTCTGTAAAGCATCCTATTGCCAGCGGAACAACACCTGGTAACAGGTGCCTCTGGGGCCAAA  
AGCCAAGGTTTAAACAAACCTTTAGGATTGGTTCTAAACCTGAGATGTTGTGGAAGATACTTAGTACCTACCGATCTGGT  
AGTAGTGCAAACACTAGTTGTAAGGCCACGAAGGATGCCAGAAAGGTACCCATAGGTAACAAGCGACACTATGGATCTG  
ACCTGGGGCCAGGTACCTCT

>SRR2298573.235938 235938 length=500  
ACATTTTGTCTGTAAAGCATCCTATTGCCAGCGGAACAACACCTGGTAACAGGTGCCTCTGGGGCCAAAAGCCAAGGTTTA  
ACAAACCTTTAGGATTGGTTCTAAACCTGAGATGTTGTGGAAGATACTTAGTACCTACCGATCTGGTAGTAGTGCAAAC



ACTAGTTGTAAGGCCACGAAGGATGCCCAGAAGGTACCCATAGGTAACAAGCGACACTATGGATCTGATCTGGGGCCAG  
GTACCTCTATCCCCCGGGTTTGGCCCACTAGACGTTTTTTAAACCAGATCACCAAGCTAGAGGTACCTGGCCCCAGATCA  
GATCCATAGTGTGCTTGTACCTATGGGTACCTTCTGGGCATCCTTCGTGGGCCCTTACAACACTAGTGTTCGACTACTAC  
CAGATCGGTAGGTACTAAGAATCTTTCACAACATCTCAGGTTTTAGAACCAATCCTAACGGGTTTTGTTAACCTTTGGCTTT  
TGGCCCCGGGGCCCCCTTTC

>SRR2298573.227970 227970 length=500

CTGTAAAGCATCCTATTGCCAGCGGAACAACACCTGGTAACAGGTGCCTCTGGGGCCAAAAGCCAAGGTTTAAACAAACC  
TTTAGGATTGGTTCTAAACCTGAGATGTTGTGGAAGATACTTAGTACCTACCGATCTGGTAGTAGTGCAAACACTAGTTG  
TAAGGCCACGAAGGATGCCCAGAAGGTACCCATAGGTAACAAGCGACACTATGGATCTGAACTGGGGCCAGGAACCTCT  
ATCTTGGCTGCCAAGATAGAGGTACCTGGCCCCAGATCAGATCCATAGTGTGCTTGTACCTATGGGTACCTTCTGGGC  
ATCCTTCGTGGGCCCTTACAACACTAGTGTTCGACTACTACCAGATCGGTAGGTACTAAGTATCTTCCACAACATCTCAGGT  
TTAGAACCAATCCTAAAAGGTTTTGTTAAACCTTTGGCTTTTGGCCCCAGAGGCACCTGTTACCAGGTGTTGTTCCGCTGGC  
AATAGGATGCTTTACAGCGG

>SRR2298573.171554 171554 length=500

CCTTATGCTCACACAGCCATCCTCTAGTAAGTTTGTGAGACGTCTGGTGACGTGTGGGAACCTTATTGAAAACAACATTTT  
GCTGTAAAGCATCCTATTGCCAGCGGAACAACACCTGGTAACAGGTGCCTCTGGGGCCAAAAGCCAAGGTTTAAACAAACC  
CTTTAGGATTGGTTCTAAACCTGAGATGTTGTGGAAGATACTTAGTACCTACCGATCTGGTAGTAGTGCAAACACTAGTT  
GTAAGGCCCACTCTCATTAACTACATTTGATAGTGGAACTCAACTGAACTGACCACTCCGGTCGCCATATCTGCAATACTCT  
TAATTGTCTCCATAGTGGCATTGATAAAAAATAAAGGAAAACCGGGGATCCCCCGGGTTTTGGCCCCACTAGACGTTTTTTTA  
ACCAGATCACCAAGATAAAGGTACCTGGCCCCAGATCAGATCCATAGGGTGCCTTGTACCTATGGGTACCTTCTGGGCA  
CCCTTCTGGGGCCTTACAAC

>SRR2298573.169771 169771 length=500

GGCCAAAAGCCAAGGTTTAAACAAACCCTTTAGGATTGGTTCTAAACCTGAGATGTTGTGGAAGATACTTAGTACCTACCG  
ATCTGGTAGTAGTGCAAACACTAGTTGTAAGGCCACGAAGGATGCCAGAAAGGTACCCATAGGTAACAAGCGACACTAT  
GGATCTGATCTGGGGCCAGGTACCTCTATCTTGGTGATCTGGTTAAAAAACGCTCTAGTGGGGCCAAAACCGGGGGGATCC  
CCGGTTTTCTTGACCACTCCGGTCGCCATATCTGCAATACTCTTAATTGTCTCCATAGTGGCATTGATAAAAAATAAAGGA  
AACCGGGGATCCCCCGGGTTTTGGCCCCACTAGACGTTTTTTTAAACCAGATCACCAAGATAGAGGTACCTGGCCCCAGATC  
AGATCCATAGTGTGCTTGTACCTATGGGTACCTTCTGGGCATCCTTCGTGGGCCCTTACAACACTAGTGTTCGACTACTA  
CCAGATCGGTAGGTACTAAG

>SRR2298573.140309 140309 length=500

GTGCCCTCTGGGGCCAAAAGCCAAGGTTTAAACAAACCCTTTAGGATTGGTTCTAAACCTGAGATGTTGTGGAAGATACTTA  
GTACCTACCGATCTGGTAGTAGTGCAAACACTAGTTGTAAGGCCACGAAGGATGCCAGAAAGGTACCCATAGGTAACAA  
GCGACACTATGGATCTGATCTGGGGCCAGGTACCTCTATCTTGGTGATCTGGTTAAAAAACGCTCTAGTGGGGCCAAAACCG  
GGGGGATCCCTGCAATACTCTTAATTGTCTCCATAGTGGCATTGATAAAAAATAAAGGAAAACCGGGGATCCCCCGGGT  
TTGGCCCCACTAGACGTTTTTTTAAACCAGATCACCAAGATAGAGGTACCTGGCCCCAGATCAGATCCATAGTGTGCTTGT  
ACCTATGGGTACCTTCTGGGCATCCTTCGTGGGCCCTTACAACACTAGTGTTCGACTACTACCAGATCTGTAGGTACTAAGT  
ATCTTCCACAACCTCCCAGG

>SRR2298573.137408 137408 length=500

GAGATACCATGCTTGTGGACCTTATGCTCACACAGCCATCCTCTAGTAAGTTTTGTGAGACGTCTGGTGACGTGTGGGAAC  
TTATTGGAAAACAACATTTTGTCTGTAAGCATCCTATTGCCAGCGGAACAACACCTGGTAACAGGTGCCTCTGGGGCCAAA  
AGCCAAGGTTTAAACAAACCCTTTAGGATTGGTTCTAAACCTGAGATGTTGTGGAAGATACTTAGTACCTACCGATCTGGT  
AGTAGTGCAAAGATAGAGGTACCTGGCCCCAGATCAGATCCATAGTGTGCTTGTACCTATGGGTACCTTCTGGGCATC  
CTTCGTGGGCCCTTACAACACTAGTGTTCGACTACTACCAGATCGGTAGGTACTAAGTATCTTCCACAACATCTCAGGTTTA  
GAACCAATCCTAAAGGTTTTGTTAAACCTTTGGCTTTTGGCCCCGAGGCACCTGTTACCAGGTGTTGTTCCGCTGGCAAT  
AGGATGCTTTACAGCAAAAAG

>SRR2298573.125219 125219 length=500

AACAAACCCTTTAGGATTGGTTCTAAACCTGAGATGTTGTGGAAGATACTTAGTACCTACCGATCTGGTAGTAGTGCAA  
CACTAGTTGTAAGGCCACGAAGGATGCCAGAAAGGTACCCATAGGTAACAAGCGACACTATGGATCTGATCTGGGGCCA  
GGTACCTCTATCTTGGTGATCTGGTTAAAAAACGCTCTAGTGGGGCCAAAACCGGGGGGATCCCCGGTTTTCTTTTATTTT  
ATCAATGCCAACTCTTAATTGTCTCCATAGTGGCATTGATAAAAAATAAAGGAAAACCGGGGATCCCCCGGGTTTTGGCCC  
ACTAGACGTTTTTTTAAACCAGATCACCAAGATAGAGGTACCTGGCCCCAGATCAGATCCATAGTGTGCTTGTACCTATG  
GGTACCTTCTGGGCATCCTTCGTGGGCCCTTACAACACTAGTGTTCGACTACTACCAGATCGGTAGGACTAAGTATCTTCC  
ACAACATCTCAGGTTTAGAA

>SRR2298573.38478 38478 length=500

TGATAGTGGAACTCAACTGAACTGACCACTCCGGTCGCCATATCTGCAATACTCTTAATTGTCTCCATAGTGGCATTGATA  
AAATAAAAAGGAAAACCGGGGATCCCCCGGGTTTTGGCCCCACTAGACGTTTTTTTAAACCAGATCACCAAGATAGAGGTACCT  
GGCCCCAGATCAGATCCATAGTGTGCTTGTACCTATGGGTACCTTCTGGGCATCCTTCGTGGGCCCTTCCAACCAGGGT  
TTGCACTATAGGTTTAAACAAACCCTTTAGGATTGGTTCTAAACCTGAGATGTTGTGGAAGATACTTAGTACCTACCGATC  
TGGTAGTAGTGCAAACACTAGTTGTAAGGCCACGAAGGATGCCAGAAAGGTACCCATAGGTAACAAGCGACACTATGGA

TCTGATCTGGGGCCAGGTACCTCTATCTTGGTGATCTGGTTAAAAAACGTCTAGTGGGCCAAAACCCGGGGGGGATCCCCG  
GTTTCCTTTTATTTTATCAA  
>SRR2298573.11925 11925 length=500  
AGGTTTAAACAAACCCTTTAGGATTTGGTTCTAAACCTGAGATGTTGTGGAAGATACTTAGTACCTACCGATCTGGTAGTAG  
TGCAAACTAGTGTGTAAGGCCACGAAGGATGCCAGAAGGTACCCATAGGTAACAAGCGACTATGGATCTGATCTG  
GGCCAGGTACCTCTATCTTGGTGATCTGGTTAAAAACGTCTAGTGGGCCAAAACCCGGGGGGGATCCCCGGTTTCCTTTT  
ATTTTATCAATTTTATTACCTACATTTTCCACTCTCTCATTAACCTACATTTGATAGTGAATCAACTGAACTGAACTGACCCTCC  
GGTCGCCATATCTGCAATACTCTTAATTGCTCCATAGTGGCATTGATAAAAATAAAAGGAAACCCGGGGATCCCCCGGG  
TTTGGCCCACTAAACGTTTTTAACCAGATCACCAAGATAAAAGGAACCTGACCCCAACCCAGATCATAAGGGCGGCTTGT  
ACTCATGGTGCCCTTCTGGC  
>SRR2298546.866875 866875 length=501  
GTAGTGCATTTGGTGGTGTATGAACCCAAACCTGTTGTGACATATGACTCAAAGTTAGAATTTGGAGCGTTTACCAATTTA  
CCACATGTGTTGATGAATTTGGCTGAGACCACACAGGCTGATTTATGTATCCCCTATGTTGCTGACACAACTATGTTAA  
AACAGATTCGTCAGACTTAGGGCAACTAAAAGTCTATGTTTGGACACCTTTATCCATACCTTCAGGTTCTGCTACACAAG  
TTGATGTTACGTTCAATTTGCAATAAACTACCCAATATGGTAACATCAACTTGTGTAGCAGAACCCTGAAGGTATGGATAAA  
GGTGTCCAAACATAGACTTTTAGTTGCCCTAAGTCTGACGAATCTGTTTAAACATAGTTTGTGTGTCAGCAACATAGGGGAT  
ACATAAATCAGCCTGTGTGGTCTCAGCCAAATTCATCAACACATGTGGTAAATTTGGTAAACGCTCCAAATTCCTAACTTTG  
AGTCATATGTCACAACAGGTT  
>SRR2298546.783224 783224 length=502  
CATAAATACCAACGTTCTTGACCGAATACCCTAGGATTTTGGAAAGTCCAATTTGCAATAAGCTACCCAATATGGTAACATCA  
ACTTGTGTAGCAGAACCCTGAAGGTATGGATAAAGGTGTCCAAACATAGACTTTTAGTTGCCCTAAGTCTGACGAATCTGT  
TTTAAACATAGTTTGTGTGTCAGCAACATAGGGGATACATAAATCAGCCTGTGTGGTCTCAGCCAAATTCATCAACACATGTG  
GTAATTTGGTAGGTGGTGTATGAACCCAAACCTGTTGTGACATATGACTCAAAGTTAGAATTTGGAGCGTTTACCAATTT  
ACCACATGTGTTGATGAATTTGGCTGAGACCACACAGGCTGATTTATGTATCCCCTATGTTGCTGACACAACTATGTTA  
AAACAGATTCGTCAGACTTAGGGCAACTAAAAGTCTATGTTTGGACACCTTTATCCATACCTTCAGGTTCTGCTACACAA  
GTTGATGTTACCATATTTGGTA  
>SRR2298546.762882 762882 length=502  
AAGTACAAGTGAATGTTAATCAAGGAACAGCCGGTAGTGCATTTGGTGGTGTATGAACCCAAACCTGTTGTGACATATGAC  
TCAAAGTTAGAATTTGGAGCGTTTACCAATTTACCACATGTGTTGATGAATTTGGCTGAGACCACACAGGCTGATTTATG  
TATCCCCTATGTTGCTGACACAACTATGTTAAAAACAGATTCGTCAGACTTAGGGCAACTAAAAGTCTATGTTTGGACAC  
CTTTATCCATAACCCAATATGGTAACATCAACTTGTGTAGCAGAACCCTGAAGGTATGGATAAAGGTGTCCAAACATAGAC  
TTTTAGTTGCCCTAAGTCTGACGAATCTGTTTAAACATAGTTTGTGTGTCAGCAACATAGGGGATACATAAATCAGCCTGTG  
TGGTCTCAGCCAAATTCATCAACACATGTGGTAAATTTGGTAAACGCTCCAAATTCCTAACTTTGAGTCATATGTCACAACA  
GTTTTGGTTTCATACACCACCA  
>SRR2298546.676879 676879 length=502  
ATGACTCAAAGTTAGAATTTGGAGCGTTTACCAATTTACCACATGTGTTGATGAATTTGGCTGAGACCACACAGGCTGAT  
TTATGTATCCCCTATGTTGCTGACACAACTATGTTAAAAACAGATTCGTCAGACTTAGGGCAACTAAAAGTCTATGTTTGG  
GACACCTTTATCCATACCTTCAGGTTCTGCTACACAAGTTGATGTTACCATATTTGGGTAGCTTATTGCAATTTGGACTTCC  
AAAATCCTAGGGTGTCTATTTGTAAGAAATTTCTTAAAGATTTTGGCTTCCGCGTTGGTGCATTTGTCATAAATACCAACGTC  
TGACCGAATACCTTAGGATTTTGGAAAGTCCAATTTGCAATAAGCTACCCAATATGGTAACATCAACTTGTGTAGCAGAACC  
TGAAGGTATGGATAAAGGTGTCCAAACATAGACTTTTAGTTGCCCTAAGTCTGACGAATCTGTTTAAACATAGATTTGTGT  
CAGCAACATAGGGGATACATAA  
>SRR2298546.661134 661134 length=501  
GTAGTGCATTTGGTGGTGTATGAACCCAAACCTGTTGTGACATATGACTCAAAGTTAGAATTTGGAGCGTTTACCAATTTA  
CCACATGTGTTGATGAATTTGGCTGAGACCACACAGGCTGATTTATGTATCCCCTATGTTGCTGACACAACTATGTTAA  
AACAGATTCGTCAGACTTAGGGCAACTAAAAGTCTATGTTTGGACACCTTTATCCATACCTTCAGGTTCTGCTACACAAG  
TTGATGTTACCCCTAGGATTTTGGAAAGTCCAATTTGCAATAAGCTACCCAATATGGTAACATCAACTTGTGTAGCAGAACC  
TGAAGGTATGGATAAAGGTGTCCAAACATAGACTTTTAGTTGCCCTAAGTCTGACGAATCTGTTTAAACATAGATTTGTGT  
CAGCAACATAGGGGATACATAAATCAGCCTGTGTGGTCTCAGCCAAATTCATCAACACATGTGGTAAATTTGGTAAACGCT  
CCAAATTCCTAACTTTGAGTCA  
>SRR2298546.580465 580465 length=501  
GGTGCATTTGTCATAAATACCAACGTTCTTGACCGAATACCCTAGGATTTTGGAAAGTCCAATTTGCAATAAGCTACCCAATAT  
GGTAACATCAACTTGTGTAGCAGAACCCTGAAGGTATGGATAAAGGTGTCCAAACATAGACTTTTAGTTGCCCTAAGTCTG  
ACGAATCTGTTTAAACATAGTTTGTGTGTCAGCAACATAGGGGATACATAAATCAGCCTGTGTGGTCTCAGCCAAATTCATC  
AACACATGTGGGTAGTGCATTTGGTGGTGTATGAACCCAAACCTGTTGTGACATATGACTCAAAGTTAGAATTTGGAGCGT  
TTACCAATTTACCACATGTGTTGATGAATTTGGCTGAGACCACACAGGCTGATTTATGTATCCCCTATGTTGCTGACACA  
AACTATGTTAAAAACAGATTCGTCAGACTTAGGGCAACTAAAAGTCTATGTTTGGACACCTTTATCCATACCTTCAGGTTCT  
TGCTACACAAGTTGATGTTAC  
>SRR2298546.555649 555649 length=502

GCATTGGTGGTGTATGAACCCAAACCTGTTGTGACATATGACTCAAAGTTAGAATTTGGAGCGTTTACCAATTTACCACA  
TGTGTTGATGAATTTGGCTGAGACCACACAGGCTGATTTATGTATCCCCTATGTTGCTGACACAAACTATGTTAAAAACAG  
ATTCGTCAGACTTAGGGCAACTAAAAAGTCTATGTTTGGACACCTTTATCCATACCTTCAGGTTCTGCTACACAAGTTGAT  
GTTACCATATTCACTTGTATTAGTGCTCATTGTAAGAATTTTCTTAAGATTTTGTCTCCGCGTTGGTGCATTTGTCATAAA  
TACCAACGCTTTGACCGAATACCCTAGGATTTTGGAAAGTCCAATTGCAATAAGCTACCCAATATGGTAACATCAACTTGT  
GTAGCAGAACCTGAAGGTATGGATAAAGGTGTCCAAACATAGACTTTTAGTTGCCCTAAGTCTGACGAATCTGTTTAAAC  
ATAGTTTGTGTCAGCAACATAG

>SRR2298546.529810 529810 length=502

TTGGTGGTGTATGAACCCAAACCTGTTGTGACATATGACTCAAAGTTAGAATTTGGAGCGTTTACCAATTTACCACATGT  
GTTGATGAATTTGGCTGAGACCACACAGGCTGATTTATGTATCCCCTATGTTGCTGACACAAACTATGTTAAAAACAGATT  
CGTCAGACTTAGGGCAACTAAAAAGTCTATGTTTGGACACCTTTATCCATACCTTCAGGTTCTGCTACACAAGTTGATGTT  
ACCATATTTGGGCCCTAGGATTTTGGAAAGTCCAATTGCAATAAGCTACCCAATATGGTAACATCAACTTGTGTAGCAGAAC  
CTGAAGGTATGGATAAAGGTGTCCAAACATAGACTTTTAGTTGCCCTAAGTCTGACGAATCTGTTTAAACATAGTTTGTG  
TCAGCAACATAGGGGATACATAAATCAGCCTGTGTGGTCTCAGCCAAATTCATCAACACATGTGGTAAATTTGGTAAACGC  
TCCAAATTTAACTTTGAGTCA

>SRR2298546.521679 521679 length=502

GGTGCATTTGCATAAATACCAACGCTTTGACCGAATACCCTAGGATTTTGGAAAGTCCAATTGCAATAAGCTACCCAATAT  
GGTAACATCAACTTGTGTAGCAGAACCTGAAGGTATGGATAAAGGTGTCCAAACATAGACTTTTAGTTGCCCTAAGTCTG  
ACGAATCTGTTTAAACATAGTTTGTGTGTCAGCAACATAGGGGATACATAAATCAGCCTGTGTGGTCTCAGCCAAATTCATC  
AACACATGTGGGCATTTGGTGGTGTATGAACCCAAACCTGTTGTGACATATGACTCAAAGTTAGAATTTGGAGCGTTTACC  
AATTTACCACATGTGTTGATGAATTTGGCTGAGACCACACAGGCTGATTTATGTATCCCCTATGTTGCTGACACAAACTA  
TGTTAAAAACAGATTCGTCAGACTTAGGGCAACTAAAAAGTCTATGTTTGGACACCTTTATCCATACCTTCAGGTTCTGCTA  
CACAAAGTTGATGTTACCATATT

>SRR2298546.519576 519576 length=502

ACATAGCGCTCCGCTGTGGTGGTGTATGAACCCAAACCTGTTGTGACATATGACTCAAAGTTAGAATTTGGAGCGTTTAC  
CAATTTACCACATGTGTTGATGAATTTGGCTGAGACCACACAGGCTGATTTATGTATCCCCTATGTTGCTGACACAAACT  
ATGTTAAAAACAGATTCGTCAGACTTAGGGCAACTAAAAAGTCTATGTTTGGACACCTTTATCCATACCTTCAGGTTCTGCT  
ACACAAGTTGAACCCAAATATGGTAACATCAACTTGTGTAGCAGAACCTGAAGGTATGGATAAAGGTGTCCAAACATAGAC  
TTTTAGTTGCCCTAAGTCTGACGAATCTGTTTAAACATAGTTTGTGTGTCAGCAACATAGGGGATACATAAATCAGCCTGTG  
TGGTCTCAGCCAAATTCATCAACACATGTGGTAAATTTGGTAAACGCTCCAAATTTAACTTTGAGTCAATATGTCACAACA  
GGTTTGGGTTTCATACACCACCA

>SRR2298546.505689 505689 length=502

CTGTCTTTGGGTCATAGAATGCCCTTTCTCCAACCAAAGCAATTTGATTGCGCTGCAGTGGTACTCAATACGTTTCGCCATG  
TTCATAGAACCTGGCCCTTCTGCAATGTCAATTTTCCCCTAGTCCACTTGTATTTAGTGCTCATTGTAAGAATTTTCTT  
AAGATTTTGGCTCCGCGTTGGTGCATTGTCATAAATACCAACGCTTTGACCGAATACCCTAGGATTTTGGAAAGTCCAATT  
GCAATAAGCTAGGTGGTGTATGAACCCAAACCTGTTGTGACATATGACTCAAAGTTAGAATTTGGAGCGTTTACCAATTT  
ACCACATGTGTTGATGAATTTGGCTGAGACCACACAGGCTGATTTATGTATCCCCTATGTTGCTGACACAAACTATGTTA  
AAACAGATTCGTCAGACTTAGGGCAACTAAAAAGTCTATGTTTGGACACCTTTATCCATACCTTCAGGTTCTGCTACACAA  
GTTGATGTTACCATATTGGGTA

>SRR2298546.478474 478474 length=501

GTGCATTTGGTGGTGTATGAACCCAAACCTGTTGTGACATATGACTCAAAGTTAGAATTTGGAGCGTTTACCAATTTACCA  
CATGTGTTGATGAATTTGGCTGAGACCACACAGGCTGATTTATGTATCCCCTATGTTGCTGACACAAACTATGTTAAAAAC  
AGATTCGTCAGACTTAGGGCAACTAAAAAGTCTATGTTTGGACACCTTTATCCATACCTTCAGGTTCTGCTACACAAGTTG  
ATGTTACCATACCCCTAGTCCACTTGTATTTAGTGCTCATTGTAAGAATTTTCTTAAGATTTTGGCTCCGCGTTGGTGCA  
TTGTCATAAATACCAACGCTTTGACCGAATACCCTAGGATTTTGGAAAGTCCAATTGCAATAAGCTACCCAATATGGTAAC  
ATCAACTTGTGTAGCAGAACCTGAAGGTATGGATAAAGGTGTCCAAACATAGACTTTTAGTTGCCCTAAGTCTGACGAAT  
CTGTTTAAACATAGTTTGTGT

>SRR2298546.429699 429699 length=502

ATGCCATGGTTGGCTGAAGGGGTTGTGGAGTCACTCATTACAGAAAAAGTTGAGATATTTTTACTAAATCATCAAACCT  
ACTCTTGCTTCTGCTGTTCTTGGGTCATAGAATGCCCTTTCTCCAACCAAAGCAATTTGATTGCGCTGCAGTGGTACTCA  
ATACGTTTCGCCATGTTTCATAGAACCTGGCCCTTCTGCAATGTCAATTTTCCCCTAGTCCACTTGTATTTAGTGCTCATT  
GTAAGAATTTTAGTGAATGTTAATCAAGGAACAGCCGGTAGTGCAATTTGGTGGTGTATGAACCCAAACCTGTTGTGACATA  
TGACTCAAAGTTAGAATTTGGAGCGTTTACCAATTTACCACATGTGTTGATGAATTTGGCTGAGACCACACAGGCTGATT  
TATGTATCCCCTATGTTGCTGACACAAACTATGTTAAAAACAGATTCGTCAGACTTAGGGCAACTAAAAAGTCTATGTTTGG  
ACACCTTTATCCATACCTTCAG

>SRR2298546.417769 417769 length=502

ACCTGAAGGTATGGATAAAGGTGTCCAAACATAGACTTTTAGTTGCCCTAAGTCTGACGAATCTGTTTAAACATAGTTTG  
TGTCAGCAACATAGGGGATACATAAATCAGCCTGTGTGGTCTCAGCCAAATTCATCAACACATGTGGTAAATTTGGTAAAC  
GCTCCAAATTTAACTTTGAGTCAATATGTCACAACAGGTTTGGGTTTCATACACCACCAATGCACTACCGGCTGTTCTCTG

ATTAACATTCAGGACATCAGATAACCCATGTGGAACTACCAAAAAGTCTTTTGGGACAAAAACAGCAAGCCAGCCTATGGC  
CAATCAAGATACTTTGCAGCAGTACGGTGTGGTTTTTCATTTTCAAGTACAAGTGAATGTTAATCAAGGAACAGCCGGTAG  
TGCATTTGGTGGTGTATGAACCCAAAACCTGTTGTGACATATGACTCAAAGTTAGAATTTGGAGCGTTTACCAATTTACCAC  
ATGTGTTGATGAATTTGGCTGA

>SRR2298546.405018 405018 length=502

GCAATAAGCTACCCAATATGGTAAACATCAACTTGTGTAGCAGAACCTGAAGGTATGGATAAAGGTGTCCAAACATAGACT  
TTTAGTTGCCCTAAGTCTGACGAATCTGTTTTAACATAGTTTGTGTGACCAACATAGGGGATACATAAATCAGCCTGTGT  
GGTCTCAGCCAAATTCATCAACACATGTGGTAAATTTGGTAAACGCTCCAAATTCCTAAGTTGAGTCATATGTCACAACAG  
GTTTGGGTTTCAGGTAGTGCATTTGGTGGTGTATGAACCCAAAACCTGTTGTGACATATGACTCAAAGTTAGAATTTGGAGCG  
TTTACCAATTTACCACATGTGTTGATGAATTTGGCTGAGACCACACAGGCTGATTTATGTATCCCCTATGTTGCTGACAC  
AAACTATGTTAAAAACAGATTTCGTGACACTTAGGGCAACTAAAAAGTCTATGTTTGGACACCTTTATCCATACCTTCAGGTT  
CTGCTACACAAGTTGATGTTAA

>SRR2298546.355837 355837 length=502

CATTTGGTGGTGTATGAACCCAAAACCTGTTGTGACATATGACTCAAAGTTAGAATTTGGAGCGTTTACCAATTTACCACAT  
GTGTTGATGAATTTGGCTGAGACCACACAGGCTGATTTATGTATCCCCTATGTTGCTGACACAAACTATGTTAAAAACAGA  
TTCGTGACACTTAGGGCAACTAAAAAGTCTATGTTTGGACACCTTTATCCATACCTTCAGGTTCTGCTACACAAGTTGATG  
TTACCATATTCATAAAATACCAACGCTCTTGACCGAATACCTTAGGATTTTGGAAAGTCCAATGCAATAAGCTACCCAATA  
TGGTAAACATCAACTTGTGTAGCAGAACCTGAAGGTATGGATAAAGGTGTCCAAACATAGACTTTTAGTTGCCCTAAGTCT  
GACGAATCTGTTTTAACATAGTTTGTGTGACCAACATAGGGGATACATAAATCAGCCTGTGTGGTCTCAGCCAAATTCAT  
CAACACATGTGGTAAATTTGGTA

>SRR2298546.310301 310301 length=501

CCAACGCTTTGACCGAATACCTTAGGATTTTGGAAAGTCCAATTTGCAATAAGCTACCCAATATGGTAAACATCAACTTGTGT  
AGCAGAACCTGAAGGTATGGATAAAGGTGTCCAAACATAGACTTTTAGTTGCCCTAAGTCTGACGAATCTGTTTTAACAT  
AGTTTGTGTGACCAACATAGGGGATACATAAATCAGCCTGTGTGGTCTCAGCCAAATTCATCAACACATGTGGTAAATTTG  
GTAACGCTCAGTGAATGTTAATCAAGGAACAGCCGTTAGTGCATTTGGTGGTGTATGAACCCAAAACCTGTTGTGACATAT  
GACTCAAAGTTAGAATTTGGAGCGTTTACCAATTTACCACATGTGTTGATGAATTTGGCTGAGACCACACAGGCTGATTT  
ATGTATCCCCTATGTTGCTGACACAAACTATGTTAAAAACAGATTTCGTGACACTTAGGGCAACTAAAAAGTCTATGTTTGG  
CACCTTTATCCATACCTTCAG

>SRR2298546.275254 275254 length=502

CTTGATTTTAGTGCTCATTTGTAAGAATTTTCTTAAGATTTTGTCTCCGCGTTGGTGCATTTGCATAAATCCAACGCTCTTG  
ACCGAATACCTTAGGATTTTGGAAAGCCCAATTTGCAATAAGCTACCCAATATGGTAAACATCAACTTGTGTAGCAGAACCTG  
AAGGTATGGATAAAGGTGTCCAAACATAGACTTTTAGTTGCCCTAAGTCTGACGAATCTGTTTTAACATAGTTTGTGTCA  
GCAACATAGGGGTGCATTTGGTGGTGTATGAACCCAAAACCTGTTGTGACATATGACTCAAAGTTAGAATTTGGAGCGTTTA  
CCAATTTACCACATGTGTTGATGAATTTGGCTGAGACCACACAGGCTGATTTATGTATCCCCTATGTTGCTGACACAAAC  
TATGTTAAAAACAGATTTCGTGACACTTAGGGCAACTAAAAAGTCTATGTTTGGACACCTTTATCCATACCTTCAGGTTCTG  
TACACAAGTTGATGTTACCATA

>SRR2298546.252499 252499 length=501

GTAGTGCATTTGGTGGTGTATGAACCCAAAACCTGTTGTGACATATGACTCAAAGTTAGAATTTGGAGCGTTTACCAATTTA  
CCACATGTGTTGATGAATTTGGCTGAGACCACACAGGCTGATTTATGTATCCCCTATGTTGCTGACACAAACTATGTTAA  
AACAGATTTCGTGACACTTAGGGCAACTAAAAAGTCTATGTTTGGACACCTTTATCCATACCTTCAGGTTCTGCTACACAAG  
TTGATGTTACCCTTAGGATTTTGGAAAGTCCAATTTGCAATAAGCTACCCAATATGGTAAACATCAACTTGTGTAGCAGAACC  
TGAAGGTATGGATAAAGGTGTCCAAACATAGACTTTTAGTTGCCCTAAGTCTGACGAATCTGTTTTAACATAGTTTGTGT  
CAGCAACATAGGGGATACATAAATCAGCCTGTGTGGTCTCAGCCAAATTCATCAACACATGTGGTAAATTTGGTAAACGCT  
CCAAATTCCTAAGTTGAGTCA

>SRR2298546.193011 193011 length=500

ATGTTAATCAAGGAACAGCCGGTAGTGCATTTGGTGGTGTATGAACCCAAAACCTGTTGTGACATATGACTCAAAGTTAGA  
TTTGGAGCGTTTACCAATTTACCACATGTGTTGATGAATTTGGCTGAGACCACACAGGCTGATTTATGTATCCCCTATGT  
TGCTGACACAAACTATGTTAAAAACAGATTTCGTGACACTTAGGGCAACTAAAAAGTCTATGTTTGGACACCTTTATCCATAC  
CTTCAGGTTCTTGTGTTTAGTGCTCATTGTAAGAATTTTCTTAAGATTTTGTCTCCGCGTTGGTGCATTTGCATAAATAC  
CAACGCTTTGACCGAATACCTTAGGATTTTGGAAAGTCCAATTTGCAATAAAGCTACCCAATATGGTAAACATCAACTTGTGTA  
GCAGAACCTGAAGGTATGGATAAAGGTGTCCAAACATAGACTTTTAGTTGCCCTAAGTCTGACGAATCTGTTTTAACATA  
GTTTGTGTGACCAACATAGG

>SRR2298546.191934 191934 length=501

GGTAGTGCATTTGGTGGTGTATGAACCCAAAACCTGTTGTGACATATGACTCAAAGTTAGAATTTGGAGCGTTTACCAATTT  
ACCACATGTGTTGATGAATTTGGCTGAGACCACACAGGCTGATTTATGTATCCCCTATGTTGCTGACACAAACTATGTTA  
AAACAGATTTCGTGACACTTAGGGCAACTAAAAAGTCTATGTTTGGACACCTTTATCCATACCTTCAGGTTCTGCTACACAA  
GTTGATGTTAGATTGCGCTGCAGTGGTACTCAATACGTTTCGCCATGTTTCATAGAACCTGGCCCTTCTGCAATGTCAATTT  
TTCCCCTAGTCCACTTGTATTTAGTGCTCATTGTAAGAATTTTCTTAAGATTTTGTCTCCGCGTTGGTGCATTTGCATAA  
ATACCAACGCTTTGACCGAATACCTTAGGATTTTGGAAAGTCCAATTTGCAATAAGCTACCCAATATGGTAAACATCAACTTG

TGTAGCAGAACCTGAAGGTAA  
>SRR2298546.179038 179038 length=501  
GCAGAACCTGAAGGTATGGATAAAGGTGTCCAAACATAGACTTTTAGTTGCCCTAAGTCTGACGAATCTGTTTTAACATA  
GTTTGTGTTCAGCAACATAGGGGATACATAAATCAGCCTGTGTGGTCTCAGCCAAATTCATCAACACATGTGGTAAATTTGG  
TAAACGCTCCAAATTTCTAACTTTGAGTCATATGTCACAACAGGTTTGGGTTTCATACACCACCAATGCACTACCGGCTGTT  
CCTTGATTAACCTTTGCAGCAGTACGGTGTGGTTTTTCAATTTCAAGTACAAGTGAATGTTAATCAAGGAACAGCCGGTAGT  
GCATTTGGTGGTGTATGAACCCAAACCTGTTGTGACATATGACTCAAAGTTAGAATTTGGAGCGTTTACCAATTTACCACA  
TGTGTTGATGAATTTGGCTGAGACCACACAGGCTGATTTATGTATCCCCATGTTGCTGACACAAACTATGTTAAACAG  
ATTCGTCAGACTTAGGGCAA  
>SRR2298546.106566 106566 length=502  
GACATCAGATAACCCATGTGGAACTACCAAAAGTCTTTTTGGGACAAAAACAGCAAGCCAGCCTATGGCCAAATCAAGATAC  
TTTGCAGCAGTACGGTGTGGTTTTTCAATTTCAAGTACAAGTGAATGTTAATCAAGGAACAGCCGGTAGTGCATTTGGTGGT  
GTATGAACCCAAACCTGTTGTGACATATGACTCAAAGTTAGAATTTGGAGCGTTTACCAATTTACCACATGTGTTGATGA  
ATTTGGCTGAGACCAATATGGTAAACATCAACTTGTGTAGCAGAACCTGAAGGTATGGATAAAGGTGTCCAAACATAGAC  
TTTTAGTTGCCCTAAGTCTGACGAATCTGTTTTAACATAGTTTGTGTGACGAACATAGGGGATACATAAATCAGCCTGTG  
TGGTCTCAGCCAAATTCATCAACACATGTGTTAAATTTGGTAAACGCTCCAAATTTCAACTTTGAGTCATATGTCACAACA  
GTTTTGGGTTTCATACACCACCA  
>SRR2298382.118509 118509 length=500  
TCTGGGGCCAAAAGCCAAGGTTTAAACAAACCTTTAGGATTGGTTCTAAACCTGAGATGTTGTGGAAAGATACTTAGTACC  
TACCGATCTGGTAGTAGTGCAAAACTAGTTGTAAGGCCACGAAAGGATGCCCAGAAGGTACCCATAGGTAACAAGCGAC  
ACTATGGATCTGATCTGGGGCCAGGTACCTCTATCTTGGTGATCTGGTTAAAAACGTTCTAGTGGGCCAAAACCGGGGGG  
GATCCCCGATTTCCACTCTCTCATTAACCTACATTTGATAGTGGAAATCAACTGAACTGACCACTCCGGTCCGCATATCTGC  
AATACTCTTAATTTGCTCCATAGTGGCATTGATAAAAATAAAAGGAAACCGGGGATCCCCCGGGTTTTGGCCACTAGAC  
GTTTTTTAACAGATCACCAGATAGAGGTACCTGGCCCCAGATCAGATCCATAGTGTGCTTGTACCTATGGGTACCT  
TCTGGGCATCCTTCGTGGG  
>SRR2298382.107523 107523 length=502  
CCTGGTAAACAGGTGCCTCTGGGGCCAAAAGCCAAGGTTTAAACAAACCTTTAGGATTGGTTCTAAACCTGAGATGTTGTG  
GAAGATACTTAGTACCTACCGATCTGGTAGTAGTGCAAAACTAGTTGTAAGGCCACGAAAGGATGCCCAGAAGGTACCC  
ATAGGTAACAAGCGACACTATGGATCTGATCTGGGGCCAGGTACCTCTATCTTGGTGATCTGGTTAAAAACGTTCTAGTG  
GGCCAAAACCGCTCATTAACCTACATTTGATATTTGGAATCAACTGAACTGACCACTCCGGTCCGCATATCTGCAATACTCTT  
AATTGTCTCCATAGTGGCATTGATAAAAATAACAGGAAACCGGGGATCCCCCGGGTTTTGGCCACTAGACGTTTTTTTAA  
CCAGATCACCAGATAGAGGTACCTGGCCCCAGATCAGATCCATAGTGTGCTTGTACCTATGGGTACCTTCTGGGCAT  
CCTTCGTGGGCCTTACAACCTAG  
>SRR2298382.63975 63975 length=502  
CTAGTAAGTTTTGTGAGACGCTCGGTGACGTGTGGGAACTTATTGGAAACAACATTTTTGCTGTAAAGCATCCTATTGCCAG  
CGGAACAACACCTGGTAAACAGGTGCCTCTGGGGCCAAAAGCCAAGGTTTAAACAAACCTTTAGGATTGGTTCTAAACCTG  
AGATGTTGTGGAAAGATACTTAGTACCTACCGATCTGGTAGTAGTGCAAAACTAGTTGTAAGGCCACGAAAGGATGCCCA  
GAAGGAACCCACTGTGGTAGTGATAAAAATAAAAGGAAACCGGGGATCCCCCGGGTTTTGGCCACTAGACGTTTTTTTAA  
CCAGATCACCAGATAGAGGTACCTGGCCCCAGATCAGATCCATAGTGTGCTTGTACCTATGGGTACCTTCTGGGCAT  
CCTTCGTGGGCCTTACAACCTAGTGTGTTGCACTACTACCAGATCGGTAGGTACTAAGTATCTTCCACAACATCTCAGGTTT  
AGAACCAATCCTAAAGGGTTTTG  
>SRR2298578.700636 700636 length=500  
TGTTAGTGCATTTGGTGGTGTATGAACCCAAACCCGTTGTGACATATGACTCAAAGTTAGAATTTGGAGCATTTACCAATC  
TACCACATGTGTTGATGAATTTGGCTGAGACCACACAGGCTGATTTATGTATCCCCATGTTGCTGACACAAACTATGTT  
AAAACAGATTCGTCAGACTTAGGGCAACTAAAAGTCTATGTTTTGGACACCTTTATCCATACCTTCAGGTTCTGCTACACA  
AGTTGATGTACTTGTATTTAGTGCTCATTGTAAGAATTTTTTTTTAGATTTTTGCTTCCGCGTTGGTGCATTTGTCATAAATA  
CCAACGTCCTGGCCGAATACCCTAGGGTTTTGGAAAGTCCAATTGCAATAAGCTACCCAATATGGTTACATCAACTTGTGT  
AGCAGAACCTGAAGGTATGGATAAAGGTGTCCAAACATAAACTTTTAGTTGCCCTAAGTCTGAGGAAACGGTTTTAACAA  
AATTTGGGTCAGAAACATAG  
>SRR2298578.248012 248012 length=500  
GTGACATATGACTCAAAGTTAGAATTTGGAGCATTTACCAATCTACCACATGTGTTGATGAATTTGGCTGAGACCACACA  
GGCTGATTTATGTATCCCTATGTTGTTGACACAACTATGTTAAAACAGATTCGTCAGACTTAGGGCAACTAAAAGTCT  
ATGTTTGGACACCTTTATCCATACCTTCAGGTTCTGCTACACAAGTTGATGTAACCAAAATGGGTAGCTTATTGCAATTTG  
GACTTCCAAACCTTAGGGTTTTTGGAAAGTCCAATTGCAATAAGCTACCCAATATGGTTACATCAACTTGTGTAGCAGAACC  
TGAAGGTATGGATAAAGGTGTCCAAACATAGACTTTTAGTTGCCCTAAGTCTGACGAATCTGTTTTAACATAGTTTGTGT  
CAAAAACATAGGGGATACATAAATCAGCCTGTGTGGTCTCAGCCAAATTCATCAAAAACATGTGGTAGATTGGTAAATGGT  
CCAAATTTCTAACTTTGAGTA  
>SRR2298573.878601 878601 length=500  
CTCTATTAGTGAGATACCATGCTTGTGGACCTTATGCTCACACAGCCATCCTCTAGTAAGTTTTGTGAGACGCTCTGGTGAC

GTGTGGGAACTTATTGGAAACAACATTTTGTCTGTAAAGCATCCTATTGCCAGCGGAACAACACCTGGTAACAGGTGCCTC  
TGGGGCCAAAAGCCAAGGTTTAAACAAACCCCTTAGGATTGGTTCTAAACCTTAGATGTTGTGGAAGAAAATAATAACCAA  
CCGACTGGGAATAGTGTGCTTGTACCTATGGGTACCTTCTGGGCATCCTTCGTGGGCCTTACAACCTAGTGTTCGACT  
ACTACCAGATCGGTAGGTACTAAGTATCTTCCACAACATCTCAGGTTTAGAACCAATCCTAAAGGGTTTGTAAACCTTG  
GCTTTTGGCCCCAGAGGCACCTGTTACCAGGTGTTGTTCCGCTGGCAATAGGATGCTTTACAGCAAAATGTTGTTTCCAA  
TAAGTCCCACACGTACCA

>SRR2298573.877679 877679 length=500

CCCTTAGGATTGGTTCTAAACCTGAGATGTTGTGGAAGATACTTAGTACCTGCCGATCTGGTAGTAGTGCAAACACTAG  
TTGTAAGGCCACGAAGGATGCCAGAAAGGTACCCATAGGTAACAAGCGACACTATGGATCTGATCTGGGGCCAGGTACC  
TCTATCTTGGTGATCTGGTTAAAAAACGTCTAGTGGGCCAAAACCCGGGGGGATCCCCGGTTTCTTTTATTTTATCAAT  
GCCACTATGGCTCTTAATTGTCTCCATAGTGGCATTGATAAAAAATAAAGGAAAACCGGGGATCCCCCGGGTTTGGCCCA  
CTAGACGTTTTTTAACCAGATCACCAAGATAGAGGTACCTGGCCCCAGATCAGATCCATAGGGTGCCTTGTACCTATGG  
GTACCTTCTGGGCATCCTTCGTGGGCCTTACAACCTAGGGTTTGCCTACTACCAGATCGGAAGGTAAGTACCTTCCC  
AAACACCCAGGTTTTTAAAC

>SRR2298573.870403 870403 length=500

CGTCTGGTGACGTGTGGAACTTATTGGAAACAACATTTTGTCTGTAAAGCATCCTATTGCCAGCGGAACAACACCTGGTA  
ACAGGTGCCCTGGGGCCAAAAGCCAAGGTTTAAACAAACCCCTTAGGATTGGTTCTAAACCTGAGATGTTGTGGAAGATA  
CTTAGTACCTACCGATCTGGTAGTAGTGCAAACACTAGTTGTAAGGCCACGAAGGATGCCAGAAAGGTACCCATAGGTA  
ACAAGCGCCATTTTTAACCAGATCACCAAGATAGAGGTACCTGGCCCCAGATCAGATCCATAGTGTGCTTGTACCTAT  
GGGTACCTTCTGGGCATCCTTCGTGGGCCTTACAACCTAGTGTTTGCACTACTACCAGATCGGTAGGTACTAAGTATCTTC  
CACAACTCTCAGGTTTAGAACCAATCCTAAAGGGTTTGTAAACCTTGGCTTTTGGCCCCAGAGGCACCTGTTACCAGG  
GGTGTTCGCTGGCAATAG

>SRR2298573.865355 865355 length=500

CCGCTGTAGTCTCCATAGTGGCATTGATAAAAAATAAAGGAAAACCGGGGATCCCCCGGGTTTGGCCACTAGACGTTTT  
TTAACAGATCACCAAGATAGAGGTACCTGGCCCCAGATCAGATCCATAGTGTGCTTGTACCTATGGGTACCTTCTGG  
GCATCCTTCGTGGGCCTTACAACCTAGAGTTTGCATTACTACCAGATCGGTAGGTACTAAGAATCTTCCCCAAAATTTTCA  
GTTTTGGAACAAAGTTTGTGAGACGTCTGGTGACGTGTGGAACTTATTGGAAACAACATTTTGTCTGTAAAGCATCCTATT  
GCCAGCGGAACAACACCTGGTAACAGGTGCCCTCTGGGGCCAAAAGCCAAGGTTTAAACAAACCCCTTAGGATTGGTTCTAA  
ACCTGAGATGTTGTGGAAGATACTTAGTACCTACCGATCTGGTAGTAGTGCAAACACTAGTTGTAAGGCCACGAAGGAT  
GCCCCGAAGGTACCCATAGG

>SRR2298573.855147 855147 length=500

CAACACCTGGTAACAGGTGCCCTCTGGGGCCAAAAGCCAAGGTTTAAACAAACCCCTTAGGATTGGTTCTAAACCTGAGATG  
TTGTGGAAGATACTTAGTACCTACCGATCTGGTAGTAGTGCAAACACTAGTTGTAAGGCCACGAAGGATGCCAGAAAGG  
TACCCATAGGTAACAAGCGACACTATGGATCTGATCTGGGGCCAGGTACCTCTATCTTGGTGATCTGGTTAAAAAACGTC  
TAGTGGGGCCACATAGTGGCATTGATAAAAAATAAAGGAAAACCGGGGATCCCCCGGGTTTGGCCACTAGACGTTTTTTA  
ACCAGATCACCAAGATAGAGGTACCTGGCCCCAGATCAGATCCATAGTGTGCTTGTACCTATGGGTACCTTCTGGGCA  
TCCTTCGTGGGCCTTACAACCTAGGGTTTGCCTACTAACCCAGATCGGTAGGAACTAAGTATCTTCCACAACATCTCAGGTT  
TAGAACCAATCCTAAAGGGG

>SRR2298573.849493 849493 length=500

CCCTTAGGATTGGTTCTAAACCTGAGATGTTGTGGAAGATACTTAGTACCTACCGATCTGGTAGTAGTGCAAACACTAG  
TTGTAAGGCCACGAAGGATGCCAGAAAGGTACCCATAGGTAACAAGTGACACTATGGATCTGATCTGGGGCCAGGTACC  
TCTATCTTGGTGATCTGGTTAAAAAACGTCTAGTGGGCCAAAACCCGGGGGGATCCCCGGTTTCTTTTATTTTATCAAT  
GCCACTATGGCTTAATTGTCTCCATAGTGGCATTGATAAAAAATAAAGGAAAACCGGGGATCCCCCGGGTTTGGCCACT  
AGACGTTTTTTAACCAGATCACCAAGATAGAGGTACCTGGCCCCAGATCAGATCCATAGTGTCACTTGTACCTATGGGT  
ACCTTCTGGGCATCCTTCGTGGGCCTTACAACCTAGTGTTTGCACTACTACCAGATCGGTAGGTACTAAGTATCTTCCACA  
ACATCCCCGGTTTAGAACCA

>SRR2298573.839628 839628 length=500

GTTTAAACAAACCCCTTAGGATTGGTTCTAAACCTGAGATGTTGTGGAAGATACTTAGTACCTACCGATCTGGTAGTAGTG  
CAAACACTAGTTGTAAGGCCACGAAGGATGCCAGAAAGGTACCCATAGGTAACAAGCGACACTATGGATCTGATCTGGG  
GCCAGGTACCTCTATCTTGGTGATCTGGTTAAAAAACGTCTAGTGGGCCAAAACCCGGGGGGATCCCCGGTTTCTTTTA  
TTTTATCAATACTCTTAATTGTCTCCATAGTGGCATTGATAAAAAATAAAGGAAAACCGGGGATCCCCCGGGTTTGGCCC  
ACTAGACGTTTTTTAACCAGATCACCAAGATAGAGGTACCTGGCCCCAGATCAGATCCATAGTGTCCCTTGTACCTATG  
GGTACCTTCTGGGCATCCTTCGTGGGCCTTACAACCTAGTGTTTGCACTACTACCAGATCGGTAGGTACTAAGAACTTCC  
ACAACATCCCAGGTTTAGAA

>SRR2298573.835256 835256 length=500

TCTAGTAAGTTTGTGAGACGTCTGGTGACGTGTGGAACTTATTGGAAACAACATTTTGTCTGTAAAGCATCCTATTGCCA  
GCGGAACAACACCTGGTAACAGGTGCCCTCTGGGGCCAAAAGCCAAGGTTTAAACAAACCCCTTAGGATTGGTTCTAAACCT  
GAGATGTTGTGGAAGATACTTAGTACCTACCGATCTGGTAGTAGTGCAAACACTAGTTGTAAGGCCACGAAGGATGCC  
AGAAGGAACCGCCACTAGACGTTTTTTAACCAGATCACCAAGATAGAGGTACCTGGCCCCAGATCAGATCCATAGTGTCT

GCTTGTACCTATGGGTACCTTCTGGGCATCCTTCGTGGGCCTTACAACCTAGTGTGTTGCACTACTACCAGATCGGTAGGT  
ACTAAGTATCTTCCACAACATCTCAGGTTTAGAACCAATCCTAAAGGGTTTGTAAACCTTGGCTTTTGGCCCCAAGGGC  
CCCGTTACCCGGGTGGTC

>SRR2298573.819549 819549 length=500

CTTGTACCTATGGGTACCTTCTGGGCATCCTTCGTGGGCCTTACAACCTAGTGTGTTGCACTACTACCAGATCGGTAGGTA  
CTAAGTATCTTCCACAACATCTCAGGTTTAGAACCAATCCTAAAGGGTTTGTAAACCTTGGCTTTTGGCCCCAGAGGCA  
CCTGTTACCAGGTGTTGTTCCGCTGGCAATAGGATGCTTTACAGCAAAATGTTGTTTCCAAAAAGTTCCACACGTCACC  
AGACGTCCTCAGTTCGGTGTGGGGTGGCAGATGGCGTGCCATAGCTCTATTAGTGAGATACCATGCTTGTGGACCTTATGC  
TCACACAGCCATCCTCTAGTAAGTTTGTGAGACGCTCGGTGACGCTGTGGAACTTATTGGAAACAACATTTTGTGCTGTA  
GCATCCTATTGCCAGCGGAACAACACCTGGTAACAGTGGCCTCTGGGGCCAAAAAGCCAAGGTTTAAAAAACCTTTGGGG  
TGGGGTTTAAACCCGAGTAG

>SRR2298573.806866 806866 length=500

AAACCGGGGATCCCCCGGGTTTGGCCACTAGACGTTTTTTAACCAGATCACCAAGATAGAGGTACCTGGCCCCAGAT  
CAGATCCATAGTGTGCTTGTACCTATGGGTACCTTCTGGGCATCCTTCGTGGGCCTTACAACCTAGTGTGTTGCACTACT  
ACCAGATCGGTAGGTACTAAGTATCTTCCACAACATCTCAGGTTTAGAACCAATCCTAAAGGGTTTGTAAACCTTGGCT  
TTTGGCCCCGAAACAACACCTGGTAACAGGTGCCTCTGGGGCCAAAAAGCCAAGGTTTAAACAAACCTTTAGGATTGGTTC  
TAAACCTGAGATGTTGTGGAAGATACTTAGTACCTACCGATCTGGTAGTAGTGCAAACTAGTTGTAAGGCCACGAAAG  
GATGCCCAGAAGGTACCCATAGGTAACAAGCGACACTATGGATCTGAACTGGGGCCAGGTACCTCTATCTTGGGGATCTG  
GTTAAAAACAGCCTAGTGGG

>SRR2298573.801823 801823 length=500

CCATAGCTCTATTAGTGAGATAACCATGCTTGTGGACCTTATGCTCACACAGCCATCCTCTAGTAAGTTTGTGAGACGCTC  
GGTGACGTTGGGAACTTATTGGAAACAACATTTTGTGTTAAAGCATCCTATTGCCAGCGGAACAACACCTGGTAACAGG  
TGCTCTGGGGCCAAAAAGCCAAGGTTTAAACAAACCTTTAGGATTGGTTCATAACCTGAGATGTTGTGGAAGATACTTAG  
TACCTACCGATGGGTACCTTCTGGGCATCCTTCGTGGGCCTTACAACCTAGTGTGTTGCACTACTACCAGATCGGTAGGTAC  
TAAGTATCTTCCACAACATCTCAGGTTTAGAACCAATCCTAAAGGGTTTGTAAACCTTGGCTTTTGGCCCCAGAGGCAC  
CTGTTACCAGGTGTTGTTCCGCTGGCAATAGGATGCTTTACAGCAAAATGTTGTTTCCAATAAGTTCCACACGTCACCA  
GACGGCTCCCAACTTACTA

>SRR2298573.786859 786859 length=500

TCTAGTAAGTTTGTGAGACGCTCGGTGACGCTGTGGAACTTATTGGAAACAACATTTTGTGTTAAAGCATCCTATTGCCA  
GCGGAACAACACCTGGTAACAGGTGCCTCTGGGGCCAAAAAGCCAAGGTTTAAACAAACCTTTAGGATTGGTTCATAACCT  
GAGATGTTGTGGAAGATACTTAGTACCTACCGATCTGGTAGTAGTGCAAAACTAGTTGAAAGGCCACGAAGGATGCC  
AGAAGGGACCGATCAGATCCATAGTGTGCTTGTACCTATGGGTACCTTCTGGGCATCCTTCGTGGGCCTTACAACCTAG  
TGTGTTGCACTACTACCAGATCGGTAGGTACTAAGTATCTTCCACAACATCTCAGGTTTAGAACCAATCCTAAAGGGTTT  
TAAACCTTGGCTTTTGGCCCCAGAGGCACCTGTTACCAGGTGTTGTTCCGCTGGCAATAGGATGCTTTACAGCAAAATG  
TTGTTTCCAATAAGTTCCCA

>SRR2298573.768862 768862 length=500

CAACATTTTGTGTTAAAGCATCCTATTGCCAGCGGAACAACACCTGGTAACAGGTGCCTCTGGGGCCAAAAAGCCAAGGTT  
TAAACAAACCTTTAGGATTGGTTCATAACCTGAGATGTTGTGGAAGATACTTAGTACCTACCGATCTGGTAGTAGTGCAA  
ACACTAGTTGTAAGGCCACGAAGGATGCCCAGAAGGTACCCATAGGTAACAAGCGACACTATGGATCTGATCTGGGGCC  
AGGTACCCACCATATCTGCAATACTCTTAATTTGTCTCCATAGTGGCATTGATAAAAATAAAAGGAAACCGGGGATCCCC  
CCGGGTTTGGCCACTAGACGTTTTTTAACCAGATCACCAAGATAGAGGTACCTGGCCCCAGATCAGATCCATAGTGTGCT  
CTTGTACCTATGGGTACCTTCTGGGAATCCTTCGTGGGCCTTACAACAAGGTTTTCACAACAACCAAAACCGGTAGGTA  
CCAACGATCTTCCACAACAC

>SRR2298573.759611 759611 length=500

CCATATCTGCAATACTCTTAATTTGTCTCCATAGTGGCATTGATAAAAATAAAAGGAAACCGGGGATCCCCCGGGTTTGG  
CCCACTAGACGTTTTTTAACCAGATCACCAAGATAGAGGTACCTGGCCCCAGATCAGATCCATAGTGTGCTTGTACCT  
ATGGGTACCTTCTGGGCATCCTTCGTGGGCCTTCAAACCTAGTGTGTTGCACTACTACCAAAATCGGCAGGTACTAAGGATCT  
TCCACAACACAGGTTTAAACAAACCTTTAGGATTGGTTCATAACCTGAGATGTTGTGGAAGATACTTAGTACCTACCGAT  
CTGGTAGTAGTGCAAACTAGTTGTAAGGCCACGAAGGATGCCCAGAAGGTACCCATAGGTAACAAGCGACACTATGG  
ATCTGATCTGGGGCCAGGTACCTCTATCTTGGTGATCTGGTTAAAAAACGTTAGTGGGGCCAAACCGGGGGGATCCCC  
GGTTTCCTTTTATTTTATCA

>SRR2298573.759443 759443 length=500

CCAAGATAGAGGTACCTGGCCCCAGATCAGATCCATAGTGTGCTTGTACCTATGGGTACCTTCTGGGCATCCTTCGTG  
GGCCTTACAACCTAGTGTGTTGCACTACTACCAGATCGGTAGGTACTAAGTATCTTCCACAACATCTCAGGTTTAGAACCAA  
TCCTAAAGGGTTTGTAAACCTTGGCTTTTGGCCCCAGAGGCACCTGTTACCAGGGGTTGTTCCGCTGGCAATAGGATGC  
TTTACAGCAACCATGCTTGTGGACCTTATGCTCACACAGCCATCCTCTAGTAAGTTTGTGAGACGCTCGGTGACGTTGG  
GAACTTATTGGAAACAACATTTTGTGTTAAAGCATCCTATTGCCAGCGGAACAACACCTGGTAACAGGTGCATCTGGGGC  
CAAAAGCCAAGGTTTAAACAAACCTTTAGGATTGGTTCATAACCTGAGAGATTTTGGAAAGAACTAAGTACCTACCGATC  
TGGTGGTAGTGCAAACTG

>SRR2298573.756161 756161 length=500  
CACACAGCCATCCTCTAGTAAGTTTGTGAGACGCTCGGTGACGTGTGGGAACTTATTGGAAACAACATTTTGTCTGTAAAAG  
CATCTTATTGCCAGCGGAACAACACCTGGTAACAGGTGCCTCTGGGGCCAAAAGCCAAGGTTTAAACAAAACCTTTAGGAT  
TGGTTCTAAACCTGAGATGTTGTGGAAGATACTTAGTACCTACCGATCTGGAAGAAGTGCAAAAACAAGTTGTAAGGCCA  
CGGAAGGAGGCTATGGGTACCTTCTGGGCATCCTTCGTGGGCCCTTACAACACTAGTGTTCGACTACTACCAGATCGGTAGG  
TACTAAGTATCTTCCACAACATCTCAGGTTTAGAACCAATCCTAAAGGGTTTGTAAACCTTGGCTTTTGGCCCCAGAGG  
CACCTGTTACCAGGTGTTGTTCCGCTGGCAATAGGATGCTTTACAGCAAAAATGTTGTTTCCAATAAGGTCCCACACGTCA  
CCAGACGTCTCACAACCTTA

>SRR2298573.737432 737432 length=500  
CAACTGAACTGACCCTCCGGTCGCCATATCTGCAATACTCTTAATTGTCTCCATAGTGGCATTGATAAAAAATAAAAGGAA  
ACCGGGGATCCCCCGGGTTTGGCCCACTAGACGTTTTTTAAACCAGATCACCAAGATAGAGGTACCTGGCCCCAGATCA  
GATCCATAGTGTGCTTGTACCTATGGGTACCTTCTGGGCATCCTTCGTGGGCCCTTACAACACTAGTGTTCGACTACTAC  
CAAATCGGTGGGTTTAAACAAAACCTTTAGGATTGGTTCTAAACCTGAGATGTTGTGGAAGATACTTAGTACCTACCGATC  
TGGTAGTAGTGCAAACTAGTTGTAAGGCCACGAAGGATGCCCAGAAGGTACCCATAGGTAACAAGCGACACTATGGA  
TCTGATCTGGGGCCAGGTACCTCTATCTTGGTGATCTGGTTAAAAAACGCTTAGTGGGCCAAAACCGGGGGGGATCCCC  
GTTTCTTTTATTTTATCAA

>SRR2298573.723480 723480 length=500  
AATAAAAGGAAACCGGGGATCCCCCGGGTTTGGCCCACTAGACGTTTTTTAAACCAGATCACCAAGATAGAGGTACCTG  
GCCCCAGATCAGATCCATAGTGTGCTTGTACCTATGGGTACCTTCTGGGCATCCTTCGTGGGCCCTTACAACACTAGTGT  
TGCACTACTACCAGATCGGTAGGTACTAAGTATCTTCCACAACATCTCAGGTTTAGAACCAATCCTAAAGGGTTTGTAA  
ACCTTGGCTTACGCCATCCTCTAGTAAGTTTGTGAGACGCTCGGTGACGTGTGGGAACTTATTGGAAACAACATTTTGTCT  
GTAAAGCATCCTATTGCCAGCGGAACAACACCTGGTAACAGGTGCCTCTGGGGCCAAAAGCCAAGGTTTAAACAAAACCTT  
TAGGATTGGTTCTAAACCTGAGATGTTGTGGAAGATACTTAGTACCTACCGATCTGGTAGTAGGGCAAAACACAAGTTGGA  
AGGCCACGAAGGATGCCCA

>SRR2298573.716980 716980 length=500  
GCCATCCTCTAGTAAGTTTGTGAGACGCTCGGTGACGTGTGGGAACTTATTGGAAACAACATTTTGTCTGTAAAGCATCCT  
ATTGCCAGCGGAACAACACCTGGTAACAGGTGCCTCTGGGGCCAAAAGCCAAGGTTTAAACAAAACCTTTAGGATTGGTTC  
TAAACCTGAGATGTTGTGGAAGATACTTAGTACCTACCGATCTGGTAGTAGTGCAAAAACTAGTTGTAAGGCCACGAAG  
GATGCCCAGACTTCTGGGCATCCTTCGTGGGCCCTTACAACACTAGTGTTCGACTACTACCAGATCGGTAGGTACTAAGTAT  
CTTCCACAACATCTCAGGTTTAGAACCAATCCTAAAGGGTTTGTAAACCTTGGCTTTTGGCCCCAGAGGCACCTGTTAC  
CAGGTGTTGTTCCGCTGGCAATAGGATGCTTTACAGCAAAAATGTTGTTTCCAATAAGTTCCACACGTCACCAGACGTCC  
CACAACTTACTAAAGGATG

>SRR2298573.711657 711657 length=500  
CTGAGTTTGTGAGACGCTCGGTGACGTGTGGGAACTTATTGGAAACAACATTTTGTCTGTAAAGCATCCTATTGCCAGCGG  
AACAAACCTGGTAACAGGTGCCTCTGGGGCCAAAAGCCAAGGTTTAAACAAAACCTTTAGGATTGGTTCATAACCTGAGA  
TGTTGTGGAAGATACTTAGTACCTACCGATCTGGTAGTATTGCAAACTAGTTGTAAGGCCCCCCGAAGGATGCCCAGAA  
GGTACCCAAGGATCAGATCCATAGTGTGCTTGTACCTATGGGTACCTTCTGGGCATCCTTCGTGGGCCCTTACAACACTAG  
TGTTTGCCTACTACCAGATCGGTAGGTACTAAGTATCTTCCACAACATCTCAGGTTTAGAACCAATCCTAAAGGGTTTGT  
TTAAACCTTGGCTTTTGGCCCCAGAGGCACCTGTTACCAGGTGTTGTTCCGCTGGCAATAGGATGCTTTACAGCAAAAATG  
TTGTTTCCAATAAGTTCCCA

>SRR2298573.701171 701171 length=500  
CCAAGATAGAGGTACCTGGCCCCAGATCAGATCCATAGTGTGCTTGTAACTATGGGTACCTTCTGGGCATCCTTCGTG  
GCCTTACAACACTAGTGTTCGACTACTACCAGATCGGTAGGTACTAAGTATCTTCCACAACATCTCAGGTTTAGAACCAA  
TCTTAAAGGGTTTGTAAACCTTGGCTTTTGGCCCCAGAGGCACCTGTTACCAGGTGTTGTTCCGCTGGCAATAGGATGC  
TTTACAGCAAGCCATCCTCTAGTAAGTTTGTGAGACGCTCGGTGACGTGTGGGAACTTATTGGAAACAACATTTTGTCTGT  
AAAGCATCCTATTGCCAGCGGAACAACACCTGGTAACAGGTGCCTCTGGGGCCAAAAGCCAAGGTTTAAACAAAACCTTTA  
GGATTGGTTCTAAACCTGAGATGCTGTGGAAGATACTTAGTACCTACCGATCTGGTAGAAGTGCAAAACCTAGTTGCAAA  
GCCCCGAAGGATGCCCTA

>SRR2298573.685469 685469 length=500  
AAAGGAAACCGGGGATCCCCCGGGTTTGGCCCACTAGACGTTTTTTAAACCAGATCACCAAGATAGAGGTACCTGGCCC  
CAGATCAGATCCATAGTGTGCTTGTACCTATGGGTACCTTCTGGGCATCCTTCGTGGGCCCTTACAACACTAGTGTTCGCA  
CTACTACCAGATCGGTAGGTACTAAGTATCTTCCACAACATCTCAGGTTTAGAACCAATCCTAAAGGGTTTGTAAACCT  
TGGCTTTTGGACATAGGCGTCCGCTGTAAAGCATCCTATTGCCAGCGGAACAACACCTGGTAACAGGTGCCTCTGGGGCC  
AAAAGCCAAGGTTTAAACAAAACCTTTAGGATTGGTTCTAAACCTGAGATGTTGTGGAAGATACTTAGTACCTACCGATCT  
GGTAGTAGTGCAAACTAGTTGTAAGGCCACGAAGGAGGCCAGAAAGGAAACCAAGGTTAAAAAGGAACCAATGGAC  
CTACTTTGGGGCCGGGAACC

>SRR2298573.656085 656085 length=500  
CCTATTGCCAGCGGAACAACACCTGGTAACAGGTGCCTCTGGGGCCAAAAGCCAAGTTTAAACAAAACCTTTAGGATTGG  
TTCTAAACCTGAGATGTTGTGGAAGATACTTAGTACCTACCGATCTGGTAGTAGTGCAAACTAGTTGTAAGGCCACG



AAGGATGCCCAGAAGGTACCCATAGGTAACAAGCGACACTATGGATCTGATCTGGGGCCAGGTACCCCTATCTTGGTGAT  
CTGGTTAAAAATTTTTAACCCAGATCACCAAGATAGAGGTACCTGGCCCCAGATCAGATCCATAGTGTGCGTTGTTACCTAT  
GGGTACCTTCTGGGCATCCTTCGTGGGCCCTTACAACACTAGTGTGTTGCACTACTACCAGATCGGTAGGTACTAAGTATCTTC  
CACAACATCTCAGGTTTLAGAACCAATCCTAAAAGGGTTTGTAAACTTTGGCTTTTGGCCCCAGAGGCACCTGTTACCAGG  
TGTTGTTCCGCTGGCAATAG

>SRR2298573.648379 648379 length=500

GTGGCATTGATAAAAAATAAAAGGAAACCGGGGATCCCCCGGGTTTGGCCCCACTAGACGTTTTTTAACCCAGATCACCAAG  
ATAGAGGTACCTGGCCCCAGATCAGATCCATAGTGTGCGTTGTTACCTATGGGTACCTTCTGGGCATCCTTCGTGGGCCCT  
TACAACACTAGTGTGTTGCACTACTACCAGATCGGTAGGTACTAAGTATCTTCCACAACATCTCAGGTTTLAGAACCAATCCTA  
AAGGGTTTGTGGTAACAGGTGCCCTCTGGGGCCAAAAAGCCAAGGTTTAAACAAACCCCTTTAGGATTGGTTCTAAAACCTGAGA  
TGTTGTGGAAAGATACTTAGTACCTACCAGATCTGGTAGTAGTGCAAAACACTAGTTGTAAGGCCACGAAGGATGCCAGAA  
GGTACCCATAGGTAACAAAACGACCCATAGGATCTGATCTGGGGCCAGGTACCTCTATCTTGGTGAACCTGGTTAAAAAACG  
TCTAGTGGGCCAAAAACCGGG

>SRR2298573.641321 641321 length=500

CTTTAGGATTGGTTCTAAAACCTGAGATGTTGTGGAAGATACTTAGTACCTACCAGATCTGGTAGTAGTGCAAAACACTAGTT  
GTAAGGCCACGAAGGATGCCAGAAGGTACCCATAGGTAACAAGCGACACTATGGATCTGATCTGGGGCCAGGTACCTC  
TATCTTGGTGATCTGGTTAAAAAACGTTCTAGTGGGCCAAACCCGGGGGGATCCCCGGTTTCTTTTATTTTATCAATGC  
CACAATGGAGCTCCATAGTGGCATTGATAAAAAATAAAAGGAAACCGGGGATCCCCCGGGTTTGGCCCCACTAGACGTTTTT  
TTAACCCAGATCACCAAGATAGAGGTACCTGGCCCCAGATCAGATCCATAGTGTGCGTTGTTACCTATGGGTACCTTCTGG  
GCATCCTTCGTGGGCCCTTACAACACTAGTGTGTTGCACTACTACCAGATCGGTAGGTACTAAGCATCTTCCACAACATCCAG  
GTTTAGAACCAATCCTAAAAG

>SRR2298573.604233 604233 length=500

GTTTGTGAGACGCTCTGGTGACGTGTGGGAACCTTATTTGGAAACAACATTTTGTCTGTAAAGCATCCTATTTGCCAGCGGAACA  
ACACCTGGTAACAGGTGCCCTCTGGGGCCAAAAAGCCAAGGTTTAAACAAACCCCTTTAGGATTGGTTCTAAAACCTGAGATGTT  
GTGGAAGATACTTAGTACCTACCAGATCTGGTAGTAGTGCAAAACAAAGTTGTAAGGCCACGAAGGATGCCAGAAGGTA  
CCCATAGGTACTCTTAATTGTCTCCATAGTGGCATTGATAAAAAATAAAAGGAAACCGGGGATCCCCCGGGTTTGGCCCCA  
CTAGACGTTTTTTAACCCAGATCACCAAGATAGAGGTACCTGGCCCCAGATCAGATCCATAGTGTGCGTTGTTACCTATGG  
GTACCTTCTGGGCATCCTTCGTGGGCCCTTACAACACTAGTGTGTTGCACTCCTACCAGATCGGTAGGTACTAAGAACTCTTCCC  
AAACATCTCAGGGTTAAAAAC

>SRR2298573.602990 602990 length=500

CCAAGATAGAGGTACCTGGCCCCAGATCAGATCCATAGTGTGCGTTGTTACCTATGGGTACCTTCTGGGCATCCTTCGTG  
GGCCTTACAACACTAGTGTGTTGCACTACTACCAGATCGGTAGGTACTAAGTATCTTCCACAACATCTCAGGTTTLAGAACCAA  
TCCTAAAGGGTTTGTAAACCTTTGGCTTTTGGCCCCAGAGGCACCTGTTACCAGGGGCTGTTCCGCTGGCAATAGGATGC  
TTTACAGCAAACATTTTGTCTGTAAGCATCCTATTGCCAGCGGAACAGCACCTGGTAACAGGTGCCCTCTGGGGCCAAAAG  
CCAAGGTTTAAACAAACCCCTTTAGGATTGGTTCTAAAACCTGAGATGTTGTGGAAGATACTTAGTACCTACCAGATCTGGTAG  
TAGTGCAAAACACTAGTTGTAAGGGCCACGAAGGATGCCAGAAGGTACCCATAGGTAACAAGCGACACACTGGATCTGAT  
CTGGGGCACGGTACCTCTAT

>SRR2298573.583035 583035 length=500

TCCTATTGCCAGCGGAACAACACCTGGTAACAGGTGCCCTCTGGGGCCAAAAAGCCAAGGTTTAAACAAACCCCTTTAGGATTG  
GTTCTAAAACCTGAGATGTTGTGGAAGATACTTAGTACCTACCGATCTGGTAGTAGTGCAAAACACTAGTTGTAAGGCCAC  
GAAGGATGCCAGAAGGTACCCATAGGTAACAAGCGACACTATGGATCTGATCTGGGGCCAGGTACCTCTATCTTGGGGA  
TCTGGTTAAACATTAGAAGCATCATCTGCAACTTTGGTTAATAAATTTACCTCCAATTTTATTACCTACATTTTCCACTCT  
CTCATTAACCTACATTTGATAGTGAATCAACTGAACTGACCCTCCGGTCCGATATCTGCAATACTCTTAATTGTCTCCA  
TAGGGGCATTTGATAAAAAATAAAAGGAAACCGGGGATCCCCCGGGTTTGGCCAACCTAAAACGTTTTTTAACCCAGATCCCC  
AGATAGAGGTACCTGCCCCC

>SRR2298573.575252 575252 length=500

CTCTAGTAAGTTTTGTGAGACGCTCTGGTGACGTGTGGGAACTTATTGGAAACAACATTTTGTCTGTAAAGCATCCTATTGCC  
AGCGGAACAACACCTGGTAACAGGTGCCCTCTGGGGCCAAAAAGCCAAGGTTTAAACAAACCCCTTTAGGATTGGTTCTAAAAC  
TGAGATGTTGTGGAAGATACTTAGTACCTACCGATCTGGTAGTAGTGCAAAACACTAGTTGTAAGGCCACGAAGGATGCC  
CAGAAGGGACGATCCATAGTGTGCGTTGTTACCTATGGGTACCTTCTGGGCATCCTTCGTGGGCCCTTACAACACTAGTGT  
GCACTACTACCAGATCGGTAGGTACTAAGTATCTTCCACAACATCTCAGGTTTLAGAACCAATCCTAAAAGGGTTTGTAA  
CCTTGGCTTTTGGCCCCAGAGGCACCTGTTACCAGGGTTGTTCCGCTGGCAATAGGATGCTTTACAGCAAAAATGTTGTT  
TCCAATAATTTCCACACGC

>SRR2298573.567616 567616 length=500

AACTTATTGGAAACAACATTTTGTCTGTAAAGCATCCTATTGCCAGCGGAACAACACCTGGTAACAGGTGCCCTCTGGGGCC  
AAAAGCCAAGGTTTAAACAAACCCCTTTAGGATTGGTTCTAAAACCTGAGATGTTGTGGAAGATACTTAGTACCTACCAGATCT  
GGTAGTAGTGCAAAACACTAGTTGTAAGGCCACGAAGGATGCCAGAAAGGTACCCATAGGTAACAAGGGACACTATGGAT  
CTGATCTGGGCTCTTAATTGTCTCCATAGTGGCATTGATAAAAAATAAAAGGAAACCGGGGATCCCCCGGGTTTGGCCCCA  
CTAGACGTTTTTTAACCCAGATCACCAAGATAGAGGTACCTGGCCCCAGATCAGATCCATAGGGTGCCTTGTACCTATAG

GTACCTTCTGGGCATCCTTCGTGGGCCCTTACAACCTAGTGTGTTGAACTCTTACCAGATCGGTAGGTCCAAGGAATCTCCCA  
CAACACCTCAGGTTTAGAAC  
>SRR2298573.566690 566690 length=500  
CTGGTGACGTGTGGGAACTTATTGGAAACAACATTTTGTCTGTAAAGCATCCTATTGCCAGCGGAACAACACCTGGTAACA  
GGTGCCTCTGGGGCCAAAAGCCAAGGTTTAAACAAACCTTTAGGATTGGTTCTAAACCTGAGATGTTGTGGAAGATACTT  
AGTACCTACCGATCTGGTAGTAGTGCAAACACTAGTTGTAAGGCCACGAAGGATGCCAGAAAGGTACCCATAGGTAACA  
AGCGACACAAGATCAGATCCATAGTGTGCTTGTACCTATGGGTACCTTCTGGGCATCCTTCGTGGGCCTTACAACCTAG  
TGTTTGCCTACTACCAGATCGGTAGGTACTAAGTATCTTCCACAACATCTCAGGTTTAGAACCAATCCTAAAGGGTTTG  
TTAAACCTTGGCTTTTGGCCCCAGAGGCACCTGTTACCAGGTGTTGTTCCGCTGGCAATAGGATGCTTTACAGCAAAATG  
TTGTTTCCAATAAGTTCCCC  
>SRR2298573.556526 556526 length=500  
CTGCATTGATAGTGGAACTCAACTGAACTGACCACTCCGGTCGCCATATCTGCAATACTCTTAATTGTCTCCATAGTGGCA  
TTGATAAAAATAAAAGGAAACCGGGGATCCCCCGGGTTTGGCCACTAGACGTTTTTTTAAACCAGATCACCAAGATAGAG  
GTACCTGGCCCCAGATCAGATCCATAGTGTGCTTGTACCTATGGGTACCTTCTGGGCATCCTTCGTGGGCCTTACAAC  
TAGTGTGTTGCCTTAGTACCTACCAGATCTGGTAGTAGTGCAAACACTAGTTGTAAGGCCACGAAGGATGCCAGAAAGGTA  
CCCATAGGTAACAAGCGACACTATGGATCTGATCTGGGGCCAGGTACCTCTATCTTGGTGATCTGGTTAAAAAACGTCTA  
GTGGGCCAAAACCGGGGGGATCCCCGGTTTCCCTTTATTTTATCAATGCCCTATGGAGACAATTAAGGAATTCGAGA  
AATGGCAACCGGGGGGGCG  
>SRR2298573.543314 543314 length=500  
CTCTAGTAAGTTTGTGAGACGTCTGGTGACGTGTGGGAACTTATTGGAAACAACATTTTGTCTGTAAAGCATCCTATTGCC  
AGCGGAACAACACCTGGTAACAGGTGCCTCTGGGGCCAAAAGCCAAGGTTTAAACAAACCTTTAGGATTGGTTCTAAACC  
TGAGATGTTGTGGAAGATACTTAGTACCTACCGATCTGGTAGTAGTGCAAACACTAGTTGTAAGGCCACGAAGGATGCC  
CAGAAGGTACGATCCATAGTGTGCTTGTACCTATGGGTACCTTCTGGGCATCCTTCGTGGGCCTTACAACCTAGTGT  
GCCTACTACCAGATCGGTAGGTACTAAGTATCTTCCACAACATCTCAGGTTTAGAACCAATCCTAAAGGGTTTGTAAA  
CCTTGGCTTTTGGCCCCAGAGGACCTGTTACCAGGTGTTGTTCCGCTGGCAATAGGATGCTTTACAGCAAAATGTTGTT  
TCCAATAAGTTCCCCACGG  
>SRR2298573.528592 528592 length=500  
CCTCTGGGGCCAAAAGCCAAGGTTTAAACAAACCTTTAGGATTGGTTCTAAACCTGAGATGTTGTGGAAGATACTTAGTA  
CCTACCGATCTGGTAGTAGTGCAAACACTAGTTGTAAGGCCACGAAGGATGCCAGAAAGGTACCCATAGGTAACAAGCG  
ACACTATGGATCTGATCTGGGGCCAGGTACCTCTATCTTGGTGATCTGGTTAAAAAACGTTAGTGGGCCAAAACCGGGG  
GGGATCCCCGACTGAACTGACCACTCCGGTCGCCATATCTGCAATACTCTTAATTGTCTCCATAGTGGCATTGATAAAAT  
AAAAGGAAACCGGGGATCCCCCGGGTTTGGCCACTAGACGTTTTTTTAAACCAGATCACCAAGATAGAGGTACCTGGCC  
CCAGATCAGATCCATAGTGTGCTTGTACCAATGGGTACCTTCTGGGCATCCTTCATGGGCCTTACAACCTAGGGGTTGC  
ACTACTACCAGATCGGCAGG  
>SRR2298573.525005 525005 length=500  
GGACAGTTGAGTTGATTCCACTATCAATGTAGTTAATGAGAGAGTGGAAAAATGTAGGTAATGAAATTTGGAGGTAATTTAT  
TAACCAAAGTTGCAGATGATGCTTCTAATGTGCTCGGACCAAATTTGTTATGCTACAACAGCTGAACCAGAGAACAAGAT  
GTAGTACAGGCAACCACAACCTGTTAACACGACCAACCTGACACAACATCCCTCAGCACCAAAAAATGCCCTTCACTCCGGA  
TTTCTCCCCGATGTTGATACATTTCACTCAATGGCATATGATATCACCCTGGGGAGAAATCAGGAGTGAAGGGCATTTGT  
TGGTGCTGAGGGATGTTGTGTCAGGGTGGTCGTGTTAACAGTTGTGGTTGCCTGTACTACATCTTTGTTCTCTGGTTGAG  
CTGTTGTAGCATAACAATTTGGTCCGAGCACATTAGAAGCATCATCTGCAACTTTGGTTAATAAATTTACCTCCAAATTC  
TTACCTACATTTTCCACTCC  
>SRR2298573.524182 524182 length=500  
CTGGTGACGTGTGGGAACTTATTGGAAACAACATTTTGTCTGTAAAGCATCCTATTGCCAGCGGAACAACACCTGGTAACA  
GGTGCCTCTGGGGCCAAAAGCCAAGGTTTAAACAAACCTTTAGGATTGGTTCTAAACCTGAGATGTTGTGGAAGATACTT  
AGTACCTACCGATCTGGTAGTAGTGCAAACACTAGTTGTAAGGCCACGAAGGATGCCAGAAAGGTACCCATAGGTAACA  
AGCGACACTACCATAGTGTGCTTGTACCTATGGGTACCTTCTGGGCATCCTTCGTGGGCCTTACAACCTAGTGTGTTGCA  
CTACTACCAGATCGGTAGGTACTAAGTATCTTCCACAACATCTCAGGTTTAGAACCAATCCTAAAGGGTTTGTAAACCT  
TGGCTTTTGGCCCCAGAGGCACCTGTTACCAGGGGTTGTTCCGCTGGCAATAGGAAGCTTTACAGCCAAATGTTGTTTCC  
AATAAGTTCCACACGTCAC  
>SRR2298573.521950 521950 length=500  
CATTGATAGTGGAACTCAACTGAACTGACCACTCCGGTCGCCATATCTGCAATACTCTTAATTGTCTCCATAGTGGCATTG  
ATAAAATAAAAGGAAACCGGGGATCCCCCGGGTTTGGCCACTAGACGTTTTTTTAAACCAGGTACCAAGATAGAGGTA  
CCTGGCCCCAGATCAGATCCATAGTGTGCTTGTACCTATGGGTACCTTCTGGGCATCCTTCGTGGGCCTTACAACCTAA  
GGTTTGCACACCTACCGATCTGGTAGTAGTGCAAACACTAGTTGTAAGGCCACGAAGGATGCCAGAAAGGTACCCATAG  
GTAACAAGCGACACTATGGATCTGATCTGGGGCCAGGTACCTCTATCTTGGTGACCTGGTTAAAAAACGTTAGTGGGCC  
AAACCGGGGGGATCCCCGGTTTCCCTTTATTTTATCAATGCCACTATGGAGACAATTAAGGATTTGAGATATGGCC  
ACCGGAGTGGTCAGTTTCAGG  
>SRR2298573.521747 521747 length=500

GGTTTAAACAAACCCTTTAGGATTGGTTCTAAACCTGAGATGTTGTGGAAGATACTTAGTACCTACCGATCTGGTAGTAGT  
GCAAACTAGTTGTAAGGCCACGAAGGATGCCAGAAAGGTACCCATAGGTAACAAGCGACACTATGGATCTGATCTGG  
GGCCAGGTACCTCTATCTTGGTGATCTGGTTAAAAAAGCTCTAGTGGGCCAAAACCCGGGGGGGATCCCCGGTTTCCTTTT  
ATTTTATCAAACTCTTAATTGTCTCCATAGTGGCATTGATAAAAATAAAAGGAAACCCGGGGATCCCCCGGGTTTGGCCC  
ACTAGACGTTTTTTAACCAGATACCAAGATAGAGGTACCTGGCCCCAGATCAGATCCATAGTGTGCTTGTACCTATG  
GGTACCTTCTGGGCATCCTTCGTGGGCCTTACAACCTAGTGTTCGACTACTACCAGATCGGTAGGTACTAAGAATCTTCA  
ACAACATCTCAGGTTTAGAA

>SRR2298573.521506 521506 length=500

CCTATTGCCAGCGGAACAACACCTGGTAACAGGTGCCCTCTGGGGCCAAAAGCCAAGGTTTAAACAAACCCTTTAGGATTGG  
TTCTAAACCTGAGATGTTGTGGAAGATACTTAGTACCTACCGATCTGGTAGTAGTGCAAACTAGTTGTAAGGCCACG  
AAGGATGCCAGAAAGGTACCCATAGGTAACAAGCGACACTATGGATCTGATCTGGGGCCAGGTACCTCTATCTTGGGGAT  
CTGGTTAAAAAGGTTTGGCCACTAGACGTTTTTTAACCAGATACCAAGATAGAGGTACCTGGCCCCAGATCAGATCCAT  
AGTGTGCTTGTACCTATGGGTACCTTCTGGGCATCCTTCGTGGGCCTTACAACCTAGTGTTCGACTACTACCAGATCG  
GTAGGTACTAAGTATCTTCCACAACATCTCAGGTTTAGAACCAATCTTAAAGGTTTGTAAACCTTGGCTTTTGGCCCC  
AGAGGAACCCGTTACCAGG

>SRR2298573.502605 502605 length=500

GGCCTTACAACCTAGTGTTCGACTACTACCAGATCGGTAGGTACTAAGTATCTTCCACAACATCTCAGGTTTAGAACCAA  
TCTTAAAGGTTTGTAAACCTTGGCTTTTGGCCCCAGAGGCACCTGTTACCAGGTGTTGTTCGCTGGCAATAGGATGC  
TTTACAGCAAAATGTTGTTTCCAATAAGTTCCCACACGTCACCAGACGTCCTCACAACCTTACTAGAGGATGGCGGTGTA  
GCATAAGGTGAGTTGAAGGCAACTTGAATAAAAATGAGTGGAAACAAGACGCTTAAAGCATGGTGTAAATTTAGCTTTTCT  
AACCACATTTTGTGTGGGGTGGCAGATGGCGTGCCATAGCTCTATTAGTGAGATAACCATGCTTGTGGACCTTATGCTCA  
CACAGCCATCCTCTAGTAAGTTTGTGAGACGGCTGGTGACGTTTGGGAACCTTATTTGGAAACAACATTTTGGCGTAAAGCA  
TCCAATGGCACGCGGAACAA

>SRR2298573.502479 502479 length=500

ATCCTCTAGTAAGTTTGTGAGACGTCGTGACGTTGGGAACCTTATTTGGAACAACATTTTGTGTAAAGCATCCTATTT  
GCCAGCGGAACAACACCTGGTAACAGGTGCCCTCTGGGGCCAAAAGCCAAGGTTTAAACAAACCCTTTAGGATTGGTTCTAA  
ACCTGAGATGTTGTGGAAGATACTTAGTACCTACCGATCTGGTAGTAGTGCAAACTAGTGGTAAGGCCACGAAGGAT  
GCCAGAAAGGAGATAGAGGTACCTGGCCCCAGATCAGATCCTTAGTGTGCTTGTACCTATGGGTACCTTCTGGGCATC  
CTTCGTGGGCCTTACAACCTAGTGTTCGACTACTACCAGATCGGTAGGTACTAAGTATCTTCCACAACATCTCAGGTTTA  
GAACCAATCCTTAAAGGTTTGTAAACCTTGGCTTTTGGCCCCAGAGGAACCCGTTTCCAAGGGGTGTTTCCGCGGGCAAT  
GGGATGCTTTACACCAAAAAG

>SRR2298573.499345 499345 length=500

GGTTTAAACAAACCCTTTAGGATTGGTTCTAAACCTGAGATGTTGTGGAAGATACTTAGTACCTACCGATCTGGTAGTAGT  
GCAAACTAGTTGTAAGGCCACGAAGGATGCCAGAAAGGTACCCATAGGTAACAAGCGACACTATGGATCTGATCTGG  
GGCCAGGTACCTCTATCTTGGTGATCTGGTTAAAAAAGCTCTAGTGGGCCAAAACCCGGGGGGGATCCCCGGTTTCCTTTT  
ATTTTATCAAACTCCGGTCGCCATATCTGCAATACTCTTAATTGTCTCCATAGTGGCATTGATAAAAATAAAAGGAAACCG  
GGGATCCCCCGGGTTTGGCCCCACTAGACGTTTTTTAACCAGATCACCAGATAGAGGTACCTGGCCCCAGATCAGATC  
CATAGTGTGCTTGTACCTATGGGTACCTTCTGGGCATCCTTCGTGGGCCTTACAACCTAGAGTTTGCACTACTACCAGA  
TCGGAAGGTACTAAGTATCT

>SRR2298573.484755 484755 length=500

GGTTTAAACAAACCCTTTAGGATTGGTTCTAAACCTGAGATGTTGTGGAAGATACTTAGTACCTACCGATCTGGTAGTAGT  
GCAAACTAGTTGTAAGGCCACGAAGGATGCCAGAAAGGTACCCATAGGTAACAAGCGACACTATGGATCTGATCTGG  
GGCCAGGTACCTCTATCTTGGTGATCTGGTTAAAAAAGCTCTAGTGGGCCAAAACCCGGGGGGGATCCCCGGTTTCCTTTT  
ATTTTATCAAACTCTTAATTGTCTCCATAGTGGCATTGATAAAAATAAAAGGAAACCCGGGGATCCCCCGGGTTTGGCCCA  
CTAGACGTTTTTTAACCAGATCACCAGATAGAGGTACCTGGCCCCAGATCAGATCCATAGAGTGTGCTTGTACCTATGG  
GTACCTTCTGGGCATCCTTCTTGGGCCTTACAACCTAGTGTTCGACTACTACAAGATCGGTAGGGACTAAGTATCTTCCA  
AAACATCTCAGGTTTAAAAAC

>SRR2298573.477415 477415 length=500

GGTTTAAACAAACCCTTTAGGATTGGTTCTAAACCTGAGATGTTGTGGAAGATACTTAGTACCTACCGATCTGGTAGTAGT  
GCAAACTAGTTGTAAGGCCACGAAGGATGCCAGAAAGGTACCCATAGGTAACAAGCGACACTATGGATCTGATCTGG  
GGCCAGGTACCTCTATCTTGGTGATCTGGTTAAAAAAGCTCTAGTGGGCCAAAACCCGGGGGGGATCCCCGGTTTCCTTTT  
ATTTTATCAAGAACTTACCCTCCGGTCGCCATATCTGCAATACTCTTAATTGTCTCCATAGTGGCATTGATAAAAATAAA  
AGGAAACCCGGGGATCCCCCGGGTTTGGCCCCACTAGACGTTTTTTAACCAGATCACCAGATAGAGGTACCTGGCCCCA  
GATCAGATCCATAGTGTGCTTGTACCTATGGGTACCTTCGTGGGCATCCTTCGTGGGCCATACAACAAGGGGTTGCACA  
CCACCAAAATCGGACGGGAC

>SRR2298573.477266 477266 length=500

CCCCCGGGTTTGGCCCCACTAGACGTTTTTTAACCAGATCACCAGATAGAGGTACCTGGCCCCAGATCAGATCCATAGTG  
TCGCTTGTACCTATGGGTACCTTCTGGGCATCCTTCGTGGGCCTTACAACCTAGTGTTCGACTACTACCAGATCGGTAG  
GTACTAAGTATCTTCCACAACATCTCAGGTTTAGAACCAATCTTAAAGGTTTGTAAACCTTGGCTTTTGGCCCCAGAG

GCACCTGTTAGTGTAAATTTAGCTTTTCTAACCACATTTTGTGTGGGGTGGCAGATGGCGTGCCATAGCTCTATTAGTGA  
GATACCATGCTTGTGGACCTTATGCTCACACAGCCATCCTCTAGTAAGTTTGTGAGACGTCTGGGGACGTGTGGGAACTT  
ATTGGAAACAACATTTTGTCTGTAAAGCATCCTATTGCCAGCGGAACAACACCTGGTAAACAGGGGCCCTGGGGCCAAAAG  
CCAAGGTTTAAACAACCCCTT

>SRR2298573.474177 474177 length=500

GTGAGATACCATGCTTGTGGACCTTATGCTCACACAGCCATCCTCTAGTAAGTTTGTGAGACGTCTGGTGACGTGTGGGA  
ACTTATTGGAAACAACATTTTGTCTGTAAAGCATCCTATTGCCAGCGGAACAACACCTGGTAAACAGGTGCCTCTGGGGCCA  
AAAGCCAAGGTTTAAACAACCCCTT TAGGATTGGTTCTAAACCTGAGATGTTGTGGAAAATACTTAGAACCTACCGATCTG  
GTAGTAGGGACCATAAGTGTGCTTGTACCTATGGGTACCTTCTGGGCATCCTTCGTGGGCCTTACAACCTAGTGTGTCGA  
CTACTACCAGATCGGTAGGTACTAAGTATCTTCCACAACATCTCAGGTTTAGAACCAATCCTAAAGGGTTTGTAAACCT  
TGGCTTTTGGCCCCAGAGGCACCTGTTACCAGGTGTTGTTCCGCTGGCAATAGGATGCTTTACAGCAAAAATGTTGTTTCC  
AATAAGTTCACACACGTCAC

>SRR2298573.472684 472684 length=500

TGTGGACCTTATGCTCACACAGCCATCCTCTAGTAAGTTTGTGAGACGTCTGGTGACGTGTGGGAACCTTATTGGAAACAA  
CATTTTGTCTGTAAAGCATCCTATTGCCAGCGGAACAACACCTGGTAAACAGGTGCCTCTGGGGCCAAAAGCCAAGGTTTAA  
CAAACCCCTT TAGGATTGGTTCTAAACCTGAGATGTTGTGGAAGATACTTAGTACCTACCGATCTGGTAGTAGTCAAAAA  
CTAGTTGTAATCTCCATAGTGGCATTGATAAAAATAAAAGGAAACCGGGGATCCCCCAGGGTTTGGCCACTAGACGTTT  
TTTAAACCAGATCACCAAGATAGAGGTACCTGGCCCCAGATCAGATCCATAGTGTGCTTGTACCTATGGGTACCTTCTG  
GGTATCCTTCGTGGGCCTTACAACCTAGTGTGTTGCACTACTACCAGATCGGTAGGTACTAAGAACTCTTCCACAACACCCCA  
GGGTTTGAACCAATCCTAAA

>SRR2298573.471442 471442 length=500

GGTTTAAACAACCCCTT TAGGATTGGTTCTAAACCTGAGATGTTGTGGAAGATACTTAGTACCTACCGATCTGGTAGTAGT  
GCAAACTAGTGTGTAAGGCCACGAAGGATGCCAGAAGGTACCCATAGGTAACAAGCGACACTATGGATCTGATCTGG  
GGCCAGGTACCTCTATCTTGGTGATCTGGTTAAAAACGTCCTAGTGGGCCAAAACCCGGGGGGGATCCCCGGTTTCTTTT  
ATTTTATCAAAATTTGGTCCGAGCACATTAGAAGCATCATCTGCAACTTTGGTTAATAAATPACCTCCAATTTTATTACC  
TACATTTTCCACTCTCTCATTAACCTACATGATAGTGGAAATCAACTGAACCTGACCCTCCGGTCGCCATATCTGCAATAC  
TCTTAATTTGCTCCATAGTGGCATTGTTAAAAATAAAAGGAAACCGGGGATCCCCCAGGGTTGGGCCCTTAGACGTTTT  
TTAACAGATCACCAAGATA

>SRR2298573.470122 470122 length=500

GGAAAACCGGGGATCCCCCAGGGTTTGGCCACTAGACGTTTTTTTAAACCAGATCACCAAGATAGAGGTACCTGGCCCCAG  
ATCAGATCCATAGTGTGCTTGTACCTATGGGTACCTTCTGGGCATCCTTCGTGGGCCTTACAACCTAGTGTGTTGCACTA  
CTACCAGATCGGTAGGTACTAAGTATCTTCCACAACATCTCAGGTTTAGAACCAATCCTAAAGGGTTTGTAAACCTTGG  
CTTTTGGCCGTAAAGCATCCTATTGCCAGCGGAACAACACCTGGTAAACAGGTGCCTCTGGGGCCAAAAGCCAAGGTTTA  
ACAAACCCCTT TAGGATTGGTTCTAAACCTGAGATGTTGTGGAAGATACTTAGTACCTACCGATCTGGTAGTAGTGCAAC  
ACTAGTTGTAAGGCCACGAAGGATGCCAGAAGGTACCCAAAGGAAACAAGCGACACTATGGACCGGATCTGGGGCCAG  
GTACCTCTACCTTGGGGTAC

>SRR2298573.466202 466202 length=500

ATAAAAAGGAAAACCGGGGATCCCCCAGGGTTTGGCCACTAGACGTTTTTTTAAACCAGATCACCAAGATAGAGGTACCTGG  
CCCCAGATCAGATCCATAGTGTGCTTGTACCTATGGGTACCTTCTGGGCATCCTTCGTGGGCCTTACAACCTAGTGTGTT  
GCACTACTACCAGATCGGTAGGTACTAAGTATCTTCCACAACATCTCAGGTTTAGAACCAATCCTAAAGGGTTTGTAA  
CCTTGGCTTTCAACATTTTGTCTGTAAAGCATCCTATTGCCAGCGGAACAACACCTGGTAAACAGGTGCCTCTGGGGCCAAA  
AGCCAAGGTTTAAACAACCCCTT TAGGATTGGTTCTAAACCTGAGATGTTGTGGAAGATACTTAGTACCTACCGATCTGGT  
AGTAGTGCAAACTAGTTGTAAGGCCACGAAGGATGCCAGAAGGTACCCATAGGTAACAAGCGACACTATGGATCTG  
ATCTGGGGCCAGGTACCCCA

>SRR2298573.464947 464947 length=500

GCCATCCTCTAGTAAGTTTGTGAGACGTCTGGTGACGTGTGGGAACTTATTGGAAACAACATTTTGTCTGTAAAGCATCCT  
ATTGCCAGCGGAACAACACCTGGTAAACAGGTGCCTCTGGGGCCAAAAGCCAAGGTTTAAACAACCCCTT TAGGATTGGTTC  
TAAACCTGAGATGTTGTGGAAGATACTTAGTACCTACCGATCTGGTAGTAGTGCAAACTAGTGTGTAAGGCCACGAAG  
GATGCCCTGAGTGTGCTTGTACCTATGGGTACCTTCCAGGCATCCTTCGTGGGCCTTACAACCTAGTGTGTTGCACTACT  
ACCAGATCGGTAGGTACTAAGGATCTTCCACAACATCTCAGGTTTAGAACCAATCCTAAAGGGCTTGTAAACATTTGGCT  
TTTGGCCCCAGAGGCACCTGTTCCAGGTGTTGTTCCGCTGGCCATAGGAAGCTTTACAGCAAAAATGTTGTTTCCAATAA  
ATTCCCCACGTCCCCCGCC

>SRR2298573.460111 460111 length=500

AATAAAAGGAAAACCGGGGATCCCCCAGGGTTTGGCCACTAGACGTTTTTTTAAACCAGATCACCAAGATAGAGGTACCTG  
GCCCCAGATCAGATCCATAGTGTGCTTGTACCTATGGGTACCTTCTGGGCATCCTTCGTGGGCCTTACAACCTAGTGTGTT  
TGCACTACTACCAGATCGGTAGGTACTAAGTATCTTCCACAACATCTCAGGTTTAGAACCAATCCTAAAGGGTTTGTAA  
ACCTTGGCTTTAAACAACATTTTGTCTGTAAAGCATCCTATTGCCAGCGGAACAACACCTGGTAAACAGGTGCCTCTGGGGCC  
AAAAGCCAAGGTTTAAACAACCCCTT TAGGATTGGTTCTAAACCTGAGATGTTGTGGAAGATACTTAGTACCTACCGATCT  
GGTAGTAGTGCAAACTAGTTGTAAGGCCACGAAGGATGCCAGAAGGAACCCATAGGAAACAAGCGCCACCATGGAC

CTGACCTGGGGCCAGGTACC  
>SRR2298573.445246 445246 length=500  
AGCCAAGGTTTAAACAAACCCTTTAGGATTTGGTTCTAAACCTGAGATGTTGTGGAAGATACTTAGTACCTACCGATCTGGT  
AGTAGTGCAAACTAGTTGTAAGGCCACGAAGGATGCCAGAAAGGTACCCATAGGTAACAAGCGACACTATGGATCTG  
ATCTGGGGCCAGGTACCTCTATCTTTGGTGATCTGGTTAAAAACGTCTAGTGGGCCAAACCCGGGGGGGATCCCCGGTTT  
CCTTTTATTTCTCATTAACTACATTTGATAGTGGAAATCACTGAACTGACCACTCCGGTCGCCATATCTGCAATACTCTTA  
ATTGTCTCCATAGTGGCATTGATAAAAATAAAAGGAAACCGGGGATCCCCCGGGTTTGGCCCACTAGACGTTTTTTAAC  
CAGATCACCAAGATAGAGGTACCTGGCCCCAGATCAGATCCATAGGGTTCGTTGTTACCTATGGGTACCTTCTGGGCATC  
CTCCTTGGGCCCTTACAACCTG  
>SRR2298573.439597 439597 length=500  
ACCTGGCCCCAGATCAGATCCATAGTGTGCTTGTACCTATGGGTACCTTCTGGGCATCCTTCGTGGGCCCTTACAACCTA  
GTGTTTGCCTACTACCAGATCGGTAGGTACTAAGTATCTTCCACAACATCTCAGGTTTAGAACCAATCCTAAAGGGTTT  
GTTAAACCTTTGGCTTTTGGCCCCAGAGGCACCTGTTACCAGGTGTTGTTCCGCTGGCAATAGGATGCTTTACAGCAAAAT  
GTTGTTTCCAGTTTGTGAGACGTCTGGTGACGTGTGGAACTTATTGGAAACAACATTTTGTCTGTAAAGCATCCTATTGC  
CAGCGAACAACACCTGGTAAACAGGTGCCTCTGGGGCCAAAAGCCAAGGTTTAAACAAACCCTTTAGGATTTGGTTCTAAC  
CTGAGATGTTGTGGAAGATACTTAGTACCTACCGATCTGGTAGTAGTGCAAACTAGTTGTAAGGCCACGAAGGATGC  
CCAGAAGGAACCCATAGGGA  
>SRR2298573.434018 434018 length=500  
CACACAGCCATCCTCTAGTAAAGTTTGTGAGACGTCTGGTGACGTGTGGGAACTTATTGGAAACAACATTTTGTCTGTAAAG  
CATCCTATTGCCAGCGGAACAACACCTGGTAAACAGGTGCCTCTGGGGCCAAAAGCCAAGGTTTAAACAAACCCTTTAGGAT  
TGGTTCTAAACCTGAGATGTTGTGGAAGATACTTAGTACCTACCGATCTGGTAGTAGTGCAAAACAAAGTTGTAAGGCC  
ACGAAGGATGTGTTACCTATGGGTACCTTCTGGGCATCCTTCGTGGGCCCTTACAACCTAGTGTTTGCACTACTACCAGATC  
GGTAGGTACTAAGTATCTTCCACAACATCTCAGGTTTAGAACCAATCCTAAAGGGTTTGTAAACCTTTGGCTTTTGGCCC  
CAGAGGCACCTGTTACCAGGGGTTGTTCCGCTGGCAATAGGATGCTTTACAGCAAAATGTTGTTTCCAATAAGTTCCCC  
ACGTCACCAACGCCCCACA  
>SRR2298573.432649 432649 length=500  
ACATTTTGTCTGTAAAGCATCCTATTGCCAGCGGAACAACACCTGGTAAACAGGTGCCTCTGGGGCCAAAAGCCAAGGTTTA  
ACAAACCCTTTAGGATTTGGTTCTAAACCTGAGATGTTGTGGAAGATACTTAGTACCTACCGATCTGGTAGTAGTGCAAAAC  
ACTAGTTGTAAGGCCACGAAGGATGCCAGAAAGGTACCCATAGGTAACAAGCGACACTATGGATCTGATCTGGGGCCAG  
GAACCTCTATAAATAAAAAGGAAAACCGGGGATCCCCCGGGTTTGGCCCACTAGACGTTTTTTTAAACAGATCACCAAGATA  
GAGGTACCTGGCCCCAGATCAGATCCATAGTGTGCTTGTACCTATGGGTACCTTCTGGGCATCCTTCGTGGGCCTTAC  
AACTAGTGTTTGCACTACTACCAGATCGGTAGGTACTAAGTATCTTCCAAAAATCTCAGGGTTAGAACCAATCCTAAAG  
GGTTTGTAAACCTTTGCTT  
>SRR2298573.428971 428971 length=500  
CACTAGACGTTTTTTTAAACAGATCACCAAGATAGAGGTACCTGGCCCCAGATCAGATCCATAGTGTGCTTGTACCTAT  
GGGTACCTTCTGGGCATCCTTCGTGGGCCCTTACAACCTAGTGTTTGCACTACTACCAGATCGGTAGGTACTAAGTATCTTC  
CACAAACATCTCAGGTTTAGAACCAATCCTAAAGGGTTTGTAAACCTTTGGCTTTTGGCCCCAGAGGCACCTGTTACCAGG  
TGTTGTTCCGACATTTAGCTGTAAAGCATCCTATTGCCAGCGGAACAACACCTGGTAAACAGGTGCCTCTGGGGCCAAAAG  
CCAAGGTTTAAACAAACCCTTTAGGATTTGGTTCTAAACCTGAGATGTTGTGGAAGATACTTAGTACCTACCGATCTGGTAG  
TAGTGCAAACTAGTTGTAAGGCCACGAAGGATGCCAGAAAGGTACCCAAAGGTAACAAGCGACCCCATGGAACCTGAT  
CTGGGGCCAGGGACCCCTAC  
>SRR2298573.400359 400359 length=500  
CCTGGTAAACAGGTGCCTCTGGGGCCAAAAGCCAAGGTTTAAACAAACCCTTTAGGATTTGGTTCTAAACCTGAGATGTTGTG  
GAAGATACTTAGTACCTACCGATCTGGTAGTAGTGCAAACTAGTTGTAAGGCCACGAAGGATGCCAGAAAGGTACCC  
ATAGGTAACAAGCGACACTATGGATCTGATCTGGGGCCAGGTACCTCTATCTTGGGGATCTGGTTAAAAAACGTCTAGGG  
GGCCAAAACCGAAAATAAAAAGGAAAACCGGGGATCCCCCGGGTTTGGCCCACTAGACGTTTTTTTAAACAGATCACCAAGAT  
AGAGGTACCTGGCCCCAGATCAGATCCATAGTGTGCTTGTACCTATGGGTACCTTCTGGGCATCCTTCGTGGGCCTTA  
CAACTAGTGTTTGCACTACTACCAGATCGGTAGGTACTAAGTATCTTCCACAACATCTCAGGTTTAGAACCAATCCTAAA  
GGGTTTGTAAACCTTTGGCTT  
>SRR2298573.372955 372955 length=500  
GGTAAACAGGTGCCTCTGGGGCCAAAAGCCAAGGTTTAAACAAACCCTTTAGGATTTGGTTCTAAACCTGAGATGTTGTGGA  
GATACTTAGTACCTACCGATCTGGTAGTAGTGCAAACTAGTTGTAAGGCCACGAAGGATGCCAGAAAGGTACCCATA  
GGTAAACAAGCGACACTATGGATCTGATCTGGGGCCAGGTACCTCTATCTTGGTGATCTGGTTAAAAAACGTCTAGTGGGC  
CAAACCCGGGCTGCAATACTCTTAATTTGTCTCCATAGTGGCATTGATAAAAATAAAAAGGAAAACCGGTGATCCCCCGGGTT  
TGGCCCACTAGACGTTTTTTTAAACAGATCACCAAGATAGAGGTACCTGGCCCCAGATCAGATCCATAGTGTGCTTGTTA  
CCTATGGGTACCTTCTGGGCATCCTTCGTGGGCCTTACAACCTAGGGTTTGTGCACTACTACCCAAAACGGAAGGAACAAGTA  
ACTTCCAAAAATCCAGGA  
>SRR2298573.356978 356978 length=500  
GGGGATCCCCCGGGTTTGGCCCACTAGACGTTTTTTTAAACAGATCACCAAGATAGAGGTACCTGGCCCCAGATCAGAT

CCATAGTGTGCTTGTACCTATGGGTACCTTCTGGGCATCCTTCGTGGGCCCTTACAACCTAGTGTGTTGCACTACTACCAG  
ATCGGTAGGTACTAAGTATCTTCCACAACATCTCAGGTTTGAACCAATCCTAAAAGGTTTGTAAAACCTTGGCTTTTGG  
CCCCAGAGGCGTCTGGTGACGTGTGGGAACTTATTTGGAACAACATTTTGTCTGTAAAAGCATCCTATTGCCAGCGGAACAA  
CACCTGGTAACAGGTGCCTCTGGGGCCAAAAGCCAAGGTTTAAACAAACCTTTAGGATTTGGTTCTAAACCTGAGATGTTG  
TGAAGATACTTAGTACCTACCGATCTGGAAGTATGGCAAACACTAATTTGAAAAGCCCCGAAGGAGGCCAAAAGGGAC  
CGCAGGGAACAAGGGACCC

>SRR2298573.318184 318184 length=500

CCTATTGCCAGCGGAACAACACCTGGTAACAGGTGCCTCTGGGGCCAAAAGCCAAGGTTTAAACAAACCTTTAGGATTTGG  
TCCTAAAACCTGAGATGTTGTGGAAGATACTTAGTACCTACCGATCTGGTAGTAGTGCAAACACTAGTTGTAAGGCCACG  
AAGGATGCCAGAAAGGTACCCATAGGTAACAAGCGACACTATGGATCTGATCTGGGGCCAGGTACCTCTATCTTGGGGAC  
CTGGTTAAAAAGTGGCATTGATAAAAAATAAAGGAAAACCGGGGATCCCCCGGGTTTGGCCCACTAGACGTTTTTTAAACCA  
GATCACCAAGATAGAGGTACCTGGCCCCAGATCAGATCCATAGTGTGCTTGTACCTATGGGTACCTTCTGGGCATCCT  
TCGTGGGCCCTTACAACCTAGGGTTTGCCTACTACCAGATCGGTAGGTACTAAGAATATTCACAACAACCCAGGTTTAGG  
ACCAATCCTAAAAGGTTTGA

>SRR2298573.314513 314513 length=500

GATAGAGGTACCTGGCCCCAGATCAGATCCATAGTGTGCTTGTACCTATGGGTACCTTCTGGGCATCCTTCGTGGGCC  
TTACAACCTAGTGTGTTGCACTACTACCAGATCGGTAGGTACTAAGTATCTTCCACAACATCTCAGGTTTGAACCAATCCT  
AAAAGGTTTGTAAAACCTTGGCTTTTGGCCCCAGAGGCACCTGTTACCAGGGGTTGTTCGCTGGCAATAGGATGCTTTA  
CAGCAAAATGCCTCTAGTAAGTTTGTGAGACGTCTGGTGACGTGTGGGAACTTATTTGGAACAACATTTTGTCTGTAAAGC  
ATCCTATTGCCAGCGGAACAACACCTGGTAACAGGTGCCTCTGGGGCCAAAAGCCAAGGTTTAAACAAACCTTTAGGATTT  
GGTTCTAAAACCTGAGATGTTGTGGAAGATACTTAGTACCTACCGATCTGGTAGTAGTGCAAACACTAGTTGTAAGGCCCA  
CGAAGGATGCCCGAAGGGA

>SRR2298573.309719 309719 length=500

CCTATTGCCAGCGGAACAACACCTGGTAACAGGTGCCTCTGGGGCCAAAAGCCAAGGTTTAAACAAACCTTTAGGATTTGG  
TTCTAAAACCTGAGATGTTGTGGAAGATACTTAGTACCTACCGATCTGGTAGTAGTGCAAACACTAGTTGTAAGGCCACG  
AAGGATGCCAGAAAGGTACCCATAGGTAACAAGCGACACTATGGATCTGATCTGGGGCCAGGTACCTCTATCTTGGGGAT  
CTGGTTAAAACTCTTAATTTGTCTCCATAGTGGCATTGATAAAAAATAAAGGAAAACCGGGGATCCCCCGGGTTTGGCCCA  
CTAGACGTTTTTTAAACCAGATCACCAAGATAGAGGTACCTGGCCCCAGATCAGATCCATAGTGTGCTTGTACCTATGG  
GTACCTTCTGGGCATCCTTCGTGGGCCCTTACAACCTAGGGTTTGCCTACTACCAAAATCGGTAGGAACTAAGGATTTTCCA  
AAACATCTCAGGTTTAAAAAC

>SRR2298573.304269 304269 length=500

AGATAGAGGTACCTGGCCCCAGATCAGATCCATAGTGTGCTTGTACCTATGGGTACCTTCTGGGCATCCTTCGTGGGC  
CTTACAACCTAGTGTGTTGCACTACTACCAGATCGGTAGGTACTAAGTATCTTCCACAACATCTCAGGTTTGAACCAATCC  
TAAAGGTTTGTAAAACCTTGGCTTTTGGCCCCAGAGGCACCTGTTACCAGGTGTTGTTCCGCTGGCAATAGGTTGCTTT  
ACAGCAAAAGTGCCTTGTGGACCTTATGCTCACACAGCCATCCTCCAGTAAGTTTGTGAGACGTCTGGTGACCGGTGGGAA  
CTTATTGGAACAACATTTTGTCTGTAAAGCATCCTATTGCCAGCGGAACAACACCTGGTAACAGGTGCCTCTGGGGCCAA  
AAGCCAAGGTTTAAACAAACCTTTAGGATTTGGTTCTAAAACCTGAGAGGTGTTGGAAAATTACTTAGTACCTACCGATTTGG  
TAGTAGGGCAACCCCAAGTG

>SRR2298573.271506 271506 length=500

GGTAACAGGTGCCTCTGGGGCCAAAAGCCAAGGTTTAAACAAACCTTTAGGATTTGGTTCTAAAACCTGAGATGTTGTGGAA  
GATACTTAGTACCTACCGATCTGGTAGTAGTGCAAACACTAGTTGTAAGGCCACGAAGGATGCCAGAAAGGTACCCATA  
GGTAACAAGCGACACTATGGATCTGATCTGGGGCCAGGTACCTCTATCTTGGTGATCTGGTTAAAAAACGTTAGTGGGC  
CAAACCCGGGACTCTTAATTTGTCTCCATAGTGGCATTGATAAAAAATAAAGGAAAACCGGGGATCCCCCGGGTTTGGGCC  
ACTAGACGTTTTTTAAACCAGATCACCAAGATAGAGGTACCTGGCCCCAGATCAGATCCATAGTGTGCTTGTACCTATG  
GGTACCTTCTGGGCATCCTTCGTGGGCCCTTACAACCTAGTGTGTTGCACTACTACCAGATCGGTAGGTACCAAGAACTTCC  
ACAACATCTCAGGTTTAAAAAC

>SRR2298573.248619 248619 length=500

GAACAACACCTGGTAACAGGTGCCTCTGGGGCCAAAAGCCAAGGTTTAAACAAACCTTTAGGATTTGGTTCTAAAACCTGAG  
ATGTTGTGGAAGATACTTAGTACCTACCGATCTGGTAGTAGTGCAAACACTAGTTGTAAGGCCACGAAGGATGCCAGAA  
AGGTACCCATAGGTAACAAGCGACACTATGGATCTGATCTGGGGCCAGGTACCTCTATCTTGGTGATCTGGTTAAAAAAC  
GTCTAGTGGGGCTGTTGTAGCATAGCGATTTGGTCCGAGCACATTAGAAGCATCATCTGCAACTTTGGTTAATAAATTAC  
CTCAATTTCACTACCTACATTTTCCACTCTCTCATTAACCTACATTGATAGTGAATCAACTGAACTGACCACTCCGGTC  
GCCATATCTGCAATACTCTTAATTTGTCTCCATAGTGGCATTGCTAAAAATAAAGGAAAACCGGGGATCCCCCGGGTTTGG  
GCCCTAGCCGTTTTTTTAA

>SRR2298573.246804 246804 length=500

GCCATCCTCTAGTAAGTTTGCAGACGTCTGGTGACGTGTGGGAACTTATTTGGAACAACATTTTGTCTGTAAAAGCATCCT  
ATTGCCAGCGGAACAACACCTGGTAACAGGTGCCTCTGGGGCCAAAAGCCAAGGTTTAAACAAACCTTTAGGATTTGGTTCT  
TAAACCTGAGATGTTGTGGAAGATACTTAGTACCTACCGATCTGGTAGTAGTGCAAACACTAGTTGTAAGGCCACGAAG  
GATGCCAGGGGTACCTTCTGGGCATCCTTCGTGGGCCCTTACAACCTAGTGTGTTGCACTACTACCAGATCGGTAGGTACTA

AGTATCTTCCACAACATCTCAGGTTTAGAACCAATCCTAAAAGGGTTTGTAAACCTTGGCTTTTGGCCCCAGAGGCACCT  
GTTACCAGGGGTTGTTCGCTGGCAATAGGATGCTTTACAGCAAAATGTTGTTTCCAATAAGTTCCCAAAACGTCAACCAGC  
CGTCTCCCAACTTACTAAG

>SRR2298573.246257 246257 length=500

GAACAACACCTGGTAACAGGTGCCTCTGGGGCCAAAAGCCAAGGTTTAAACAAACCTTTAGGATTGGTTCTAAACCTGAG  
ATGTTGTGGAAGATACTTAGTACCTACCGATCTGGTAGTAGTGCAAAACACTAGTTGTAAGGCCACGAAGGATGCCAGA  
AGGTACCCATAGGTAACAAGCGACACTATGGATCTGATCTGGGGCCAGGTACCTCTATCTTGGTGAACTGGTTAAAAAAC  
GTCTAGTGGGGGTTTGGCCACTAGACGTTTTTTAAACCAGATCACCAGATAGAGGTACCTGGCCCCAGATCAGATCCA  
TAGTGTGCTTGTACCTATGGGTACCTTCTGGGCATCCTTCGTGGGCCCTTACAACACTAGTGTGTTGCACTACTACCAGATC  
GGTAGGTACTAAGTATCTTCCACAACATCTCAGGTTTAGAACCAATCCTAAAAGGGTTTGTAAACCTTGGCTTTTGGCCC  
CAGAGGCACCGGTTACCAGG

>SRR2298573.240979 240979 length=500

CCTTACAACACTAGTGTGTTGCACTACTACCAGATCGGTAGGTAAGTATCTTCCACAACATCTCAGGTTTAGAACCAATC  
CTAAAAGGGTTTGTAAACCTTGGCTTTTGGCCCCAGAGGCACCTGTTACCAGGTGTTGTTCCGCTGGCAATAGGATGCTT  
TACAGCAAAATGTTGTTTCCAATAAGTTCCCACACGTCAACCAGACGTCTCACAACCTTACTAGAGGATGGCTGTGTGAGC  
ATAAGGGCCAGATACCATGCTTGTGGACCTTATGCTCACACAGCCATCCTCTAGTAAGTTTGTGAGACGTCTGGTGACGT  
GTGGGAACCTTATTGGAAACAACATTTTGTCTGTAAGCATCCTATTGCCAGCGGAACAACACCTGGTAACAGGTGCCTCTG  
GGCCAAAAGCCAAGGTTTAAACAAACCTTTAGGATTGGTTCTAAACCTAGGATGTTGTGGAAGAAAATAAGAACCAACC  
GTCTGGGAGTAGTGCAAAA

>SRR2298573.223650 223650 length=500

GTGTCGCTTGTACCTATGGGTACCTTCTGGGCATCCTTCGTGGGCCCTTACAACACTAGTGTGTTGCACTACTACCAGATCGG  
TAGGTACTAAGTATCTTCCACAACATCTCAGGTTTAGAACCAATCCTAAAAGGGTTTGTAAACCTTGGCTTTTGGCCCCA  
GAGGCACCTGTTACCAGGTGTTGTTCCGCTGGCAATAGGATGCTTTACAGCAAAATGTTGTTTCCAATAAGTTCCACAC  
GTCACCAGACCCGCTGGAGTTTGCAGACGTCTGGTGACGTGTGGGAACCTTATTGGAAACAACATTTTGTCTGTAAGCAT  
CCTATTGCCAGCGGAACAACACCTGGTAACAGGTGCCTCTGGGGCCAAAAGCCAAGGTTTAAACAAACCTTTAGGATTGG  
TTCTAAACCTGAGATGTTGTGGAAGATACTTAGTACCTACCGATCTGGTAGTAGGGCAAAACCCAGTTTAAAGGCCACG  
AAGGATGCCAGAAAGGGACC

>SRR2298573.223439 223439 length=500

TCACACAGCCATCCTCTAGTAAGTTTGTGAGACGTCTGGTGACGTGTGGGAACCTTATTGGAAACAACATTTTGTCTGTA  
GCATCCTATTGCCAGCGGAACAACACCTGGTAACAGGTGCCTCTGGGGCCAAAAGCCAAGGTTTAAACAAACCTTTAGGA  
TTGGTTCTAAACCTGAGATGTTGTGGAAGATACTTAGTACCTACCGATCTGGTATAAGTGCAAAAACACTAGTTGTAAGGCC  
CACGAAGGTGGGGTACCTTCTGGGCATCCTTCGTGGGCCCTTACAACACTAGTGTGTTGCACTACTACCAGATCGGTAGGTACT  
AAGTATCTTCCACAACATCTCAGGTTTAGAACCAATCCTAAAAGGGTTTGTAAACCTTGGCTTTTGGCCCCAGAGGCACC  
TGTTACCAGGTGTTGTTCCGCTGGCAATAGGATGCTTTACAGCAAAATGTTGTTTCCAATAAGTTCCACACGTCAACCAG  
ACGTTCCACAACCTTACTAG

>SRR2298573.223034 223034 length=500

CTGAATTAGTGAGATACCATGCTTGTGTACCTTATGCTCACACAGCCATCCTCTAGTAAGTTTGTGAGACGTCTGGTGAC  
GTGTGGGAACTTATTGGAAACAACATTTTGTCTGTAAGCATCCTATTGCCAGCGGAACAACACCTGGTAACAGGTGCCTC  
TGGGGCCAAAAGCCAAGGTTTAAACAAACCTTTAGGATTGGTTCTAAACCTGAGAGGTTGTGGAAGAAAACCTTAGTACCTA  
CCGATCTGGATATGGGTACCTTCTGGGCATCCTTCGTGGGCCCTTACAACACTAGTGTGTTGCACTACTACCAGATCGGTAGGT  
ACTAAGTATCTTCCACAACATCTCAGGTTTAGAACCAATCCTAAAAGGGTTTGTAAACCTTGGCTTTTGGCCCCAGAGGC  
ACCTGTTACCAGGTGTTGTTCCGCTGGCAATAGGATGCTTTACAGCAAAATGTTGTTTCCAATAAGTTCCACACGTCAAC  
CAGACGTCTCAAAAACCTTAC

>SRR2298573.207601 207601 length=500

TTGTCAGACGTCTGGTGACGTGTGGGAACCTTATTGGAAACAACATTTTGTCTGTAAGCATCCTATTGCCAGCGGAACAAC  
ACCTGGTAACAGGTGCCTCTGGGGCCAAAAGCCAAGGTTTAAACAAACCTTTAGGATTGGTTCTAAACCTGAGATGTTGT  
GGAAGATACTTAGTACCTACCGATCTGGTAGTAGTGCAAAACACTAGTTGTAAGGCCCCCGAAGGATGCCAGAAAGGGACC  
CATGGGAAAAGTTTGGCCACTAGACGTTTTTTAAACCAGATCACCAGATAGAGGTACCTGGCCCCAGATCAGATCCATA  
GTGTCGCTTGTACCTATGGGTACCTTCTGGGCATCCTTCGTGGGCCCTTACAACACTAGTGTGTTGCACTACTACCAGATCGG  
TAGGTACTAAGTATCTTCCACAACATCTCAGGTTTAGAACCAATCCTAAAAGGGTTTGTAAACCTTGGCTTTTGGCCCCA  
GAGGCACCTGTTACCAGGTG

>SRR2298573.204285 204285 length=500

CCCCCGGGTTTGGCCACTAGACGTTTTTTAAACCAGATCACCAGATAGAGGTACCTGGCCCCAGATCAGATCCATAG  
TGTCGCTTGTACCTATGGGTACCTTCTGGGCATCCTTCGTGGGCCCTTACAACACTAGTGTGTTGCACTACTACCAGATCGGT  
AGGTACTAAGTATCTTCCACAACATCTCAGGTTTAGAACCAATCCTAAAAGGGTTTGTAAACCTTGGCTTTTGGCCCCAG  
AGGCACCTGTGCTCTGGTGACGTGTGGGAACCTTATTGGAAACAACATTTTGTCTGTAAGCATCCTATTGCCAGCGGAACA  
ACACCTGGTAACAGGTGCCTCTGGGGCCAAAAGCCAAGGTTTAAACAAACCTTTAGGATTGGTTCTAAACCTGAGATGTT  
GTGGAAGATACTTAGTACCTACCGATCTGGTAGTAGTGCAAAACACTAGTTGTAAGGCCACGAAGGATGCCAGAAAGGGA  
CCCATAGGGAACAACGCC

>SRR2298573.190220 190220 length=500  
GCCAAGGTTTAAACAAACCCCTTTAGGATTGGTTCTAAAACCTGAGATGTTGTGGAAGATACTTAGTACCTACCGATCTGGTA  
GTAGTGCAAACACTAGTTGTAAGGCCACGAAGGATGCCCAGAAGGTACCCATAGGTAACAAGCGACACTATGGATCTGA  
TCTGGGGCCAGGTACCTCTATCTTGGTGATCTGGTTAAAAAACGTCTAGTGGGCCAAACCCGGGGGGGATCCCCGGTTTT  
CTTTTATTTTCCACTCCGGTCGCCATATCTGCAATACTCTTAATTGTCTCCATAGTGGCATTGATAAAAATAAAAGGAAAC  
CGGGGATCCCCCGGGTTTTGGCCACTAGACGTTTTTTAAACCAGATCACCAAGATAGAGGTACCTGGCCCCAGATCAGA  
TCCATAGTGTGCTTGTACCTATGGGTACCTTCTGGGCATCCTTCGTGGGCCCTTACAACACTAGTGTGACTACTACCA  
GATCGGTAGGTACTAAGTTC

>SRR2298573.178633 178633 length=500  
GATCCCCCGGGTTTTGGCCACTAGACGTTTTTTTAAACCAGATCACCAAGATAGAGGTACCTGGCCCCAGATCAGATCCA  
TAGTGTGCTGTTGTTACCTATGGGTACCTTCTGGGCATCCTTCGTGGGCCCTTACAACACTAGTGTGACTACTACCAGATC  
GGTAGGTACTAAGTATCTTCCACAACATCTCAGGTTTAGAACCAATCCTAAAAGGGTTTTGTTAAACCTTGGCTTTTGGCCC  
CAGAGGCACCCCTCTAGTAAGTTTGTGAGACGTCTGGTGACGTGTGGAACTTATTGGAAACAACATTTTGTCTGTAAGC  
ATCCTATTGCCAGCGGAACAACACCTGGTAACAGGTGCCTCTGGGGCCAAAAGCCAAGGTTTAAACAAACCCCTTAGGATT  
GGTTCTAAAACCTGAGATGTTGTGGAAGATACTTAGTACCTACCGATCTGGTAGTAGTGCAAAACACTAGTGTGTAAGCCCC  
CGAAGGATGCCAGAAGGTC

>SRR2298573.167573 167573 length=500  
GAAACCGGGGATCCCCCGGGTTTTGGCCACTAGACGTTTTTTTAAACCAGATCACCAAGATAGAGGTACCTGGCCCCAGA  
TCAGATCCATAGTGTGCTGTTTACCTATGGGTACCTTCTGGGCATCCTTCGTGGGCCCTTACAACACTAGTGTGACTACT  
TACCAGATCGGTAGGTACTAAGTATCTTCCACAACATCTCAGGTTTAGAACCAATCCTAAAAGGGTTTTGTTAAACCTTGGC  
TTTTTGGCCCCCTCTGGGGCCAAAAGCCAAGGTTTAAACAAACCCCTTAGGATTGGTTCTAAACCTGAGATGTTGTGGAAG  
ATACTTAGTACCTACCGATCTGGTAGTAGTGCAAAACACTAGTGTGTAAGGCCACGAAGGATGCCCAGAAGGTACCCATAG  
GTAACAAGCGACACTATGGATCTGACCTGGGGCCAGGAACCTCTATCTGGGGGACCTGGTTAAAAAACGCCAGGGGGCC  
AAACCGGGGGGATCCCGG

>SRR2298573.129131 129131 length=500  
ATCCTATTGCCAGCGGAACAACACCTGGTAACAGGTGCCTCTGGGGCCAAAAGCCAAGGTTTAAACAAACCCCTTAGGATT  
GGTTCTAAAACCTGAGATGTTGTGGAAGATACTTAGTACCTACCGATCTGGTAGTAGTGCAAAACACTAGTGTGTAAGCCCCA  
CGAAGGATGCCAGAAGGTACCCATAGGTAACAAGCGACACTATGGATCTGATCTGGGGCCAGGTACCTCTATCTTGGGG  
ATCTGGTTAAACAATTTGGTCCGAGCACATTAGAAGCATCATCTGCAACTTTGGTTAATAAAATTACCTCCAATTTTATTAC  
CTACATTTTCCACTCTCTCATTAACACTACATTCATAGTGGAACTCAACTGAACTGACCACTCCGGTCGCCATATCTGCAATA  
CTCTTAATTGTCTCCATAGTGGCATTGCTAAAATAAAAGGAAACCGGGGATCCCCCTCGGGTTTTGGCCACTAGACGTTT  
TTTTAACCAGATCACACGAA

>SRR2298573.122310 122310 length=500  
GGTTTAAACAAACCCCTTAGGATTGGTTCTAAACCTGAGATGTTGTGGAAGATACTTAGTACCTACCGATCTGGTAGTAGT  
GCAAAACACTAGTTGTAAGGCCACGAAGGATGCCCAGAAGGTACCCATAGGTAACAAGCGACACTATGGATCTGATCTGG  
GGCCAGGTACCTCTATCTTGGTGATCTGGTTAAAAAACGTCTAGTGGGCCAAACCCGGGGGGGATCCCCGGTTTTCTTTTT  
ATTTTATCAACTCCGGTCGCCATATCTGCAATACTCTTAATTGTCTCCATAGTGGCATTGATAAAAATAAAAGGAAACCGG  
GGATCCCCCGGGTTTTGGCCACTAGACGTTTTTTTAAACCAGATCACCAAGATAGAGGTACCTGGCCCCAGATCAGATCC  
ATAGTGTGCTTGTACCTATGGGTACCTTCTGGGCATCCTTCGTGGGCCCTTACAACAAGTGTGTTGCACAACACTACCAAA  
CGCAAGGGCTAAAAGTATCTC

>SRR2298573.121752 121752 length=500  
CACACAGCCATCTCTAGTAAGTTTGTGAGACGTCTGGTGACGTGTGGAACTTATTGGAAACAACATTTTGTCTGTAAG  
CATCTATTGCCAGCGGAACAACACCTGGTAACAGGTGCCTCTGGGGCCAAAAGCCAAGGTTTAAACAAACCCCTTAGGAT  
TGGTTCTAAAACCTGAGATGTTGTGGAAGATACTTAGTACCTACCGATCTGGTAGTAGTGCAAAACACTAGTGTGTAAGGCC  
CCGAAGGATGTACCTATGGGTACCTTCTGGGCATCCTTCGTGGGCCCTTACAACACTAGTGTGTTGCACTACTACCAGATCGGT  
AGGTACTAAGTATCTTCCACAACATCTCAGGTTTAGAACCAATCCTAAAAGGGTTTTGTTAAACCTTGGCTTTTTGGCCCCAG  
AGGCACCTGTTACCAGGTGTTGTTCCGCTGGCAATAGGATGCTTTACAGCAAAAAGTTGTTTCCAATAAGTTCCCCCAG  
TCACCAGACGCTTCACAAAC

>SRR2298573.106244 106244 length=500  
AGCTCTATTAGTGAGATACCATGCTTGTGGACCTTATGCTCACACAGCCATCTCTAGTAAGTTTGTGAGACGTCTGGTG  
ACGTGTGGGAACTTATTGGAAACAACATTTTGTCTGTAAGCATCTATTGCCAGCGGAACAACACCTGGTAACAGGTGCC  
TCTGGGGCCAAAGCCAAGGTTTAAACAAACCCCTTAGGATTGGTTCTAAACCTGAGATGTTGTGGAATACTTAGTACC  
TACCGATCTGCTTCTGGGCATCCTTCGTGGGCCCTTACAACACTAGTGTGTTGCACTACTACCAGATCGGTAGGTACTAAGTAT  
CTTCCACAACATCTCAGGTTTAGAACCAATCCTAAAAGGGTTTTGTTAAACCTTGGCTCTTGGCCCCAGAGGCACCTGTTAC  
CAGGTGTTGTTCCGCTGGCAATAGGATGCTTTACAGCAAAAAGTTGTTTCCAATAAGTTCCACACGTCACCAGACGCTCT  
CACAACTTACTAGAGGATG

>SRR2298573.96228 96228 length=500  
CACTAGACGTTTTTTTAAACCAGATCACCAAGATAGAGGTACCTGGCCCCAGATCAGATCCATAGTGTGCTTGTACCTAT  
GGGTACCTTCTGGGCATCCTTCGTGGGCCCTTACAACACTAGTGTGTTGCACTACTACCAGATCGGTAGGTACTAAGTATCTCT



CACAACATCTCAGGTTTAGAACCAATCCTAAAAGGGTTTGTAAACCTTGGCTTTTGGCCCCAGAGGCACCTGTTACCAGG  
TGTTGTTCCGTACCATGCTTGTGGACCTTATGCTCACACAGCCATCCTCTAGTAAGTTTGTGAGACGTCTGGTGACGTGT  
GGGAACTTATTGGAAACAACATTTTGTCTGTAAGCATCCTATTGCCAGCGGAACAACACCTGGTAACAGGTGCCTCTGGG  
GCCAAAAGCCAAGGTTTAAACAAACCTTTAGGATTGGTTCTAAACCTGAGATGTTGTGGAACATACTTAGTACCTCCCGA  
GCTGGAGGTAGGGCAAAAC

>SRR2298573.90787 90787 length=500

CCTATTGCCAGCGGAACAACACCTGGTAACAGGTGCCTCTGGGGCCAAAAGCCAAGGTTTAAACAAACCTTTAGGATTGG  
TTCTAAACCTGAGATGTTGTGGAAGATACTTAGTACCTACCGATCTGGTAGTAGTGCAAACACTAGTTGTAAGGCCACG  
AAGGATGCCAGAAAGGTACCCATAGGTAACAAGCGACACTATGGATCTGATCTGGGGCCAGGAACCTCAATCTTGGTGAT  
CTGGTTAAAAACCCGGGTTTGGCCCACTAGACGTTTTTTTAAACCAGATCACCAAGATAGAGGTACCTGGCCCCAGATCAGA  
TCCATAGTGTGCTTGTACCTATGGGTACCTTCTGGGCATCCTTCGTGGGCCCTTACAACACTAGTGTTTGCACTACTACCA  
GATCGGTAGGTACTAAGTATCTTCCACAACATCTCAGGTTTAGAACCAATCCTAAAAGGGTTTGTAAACCTTGGCTTTTG  
GCCCCAGAGGCACCTGTTAC

>SRR2298573.71711 71711 length=500

GTATTTTGTGAGACGTCTGGTGACGTGTGGGAACCTTATTGGAAACAACATTTTGTCTGTAAGCATCCTATTGCCAGCGGA  
ACAACACCTGGTAACAGGTGCCTCTGGGGCCAAAAGCCAAGGTTTAAACAAACCTTTAGGATTGGTTCTAAACCTGAGAT  
GTTGTGGAAGATACTTAGTACCTACCGATCTGGTAGTAGTGCAAACACTAGTTGTAAGGCCACGAAGGATGCCAGAAAG  
GTACCCATAGGCAATACTCTTAATTGTCTCCATAGTGGCATTGATACAATAAAAGGAAACCGGGGATCCCCCGGGGTT  
GGCCCACTAGACGTTTTTTTAAACCAGATCACCAAGATAGAGGTACCTGGCCCCAGATCAGATCCATAGTGTGCTTGTAC  
CTATGGGTACCTTCTGGGCATCCTTCGTGGGCCCTTACAACACTAGTGTTTGCACTACTACCAGATCGGTAGGTACTAAGAA  
CTTCCCAAACATCTCAGGTT

>SRR2298573.49960 49960 length=500

AGCCAAGGTTTAAACAAACCTTTAGGATTGGTTCTAAACCTGAGATGTTGTGGAAGATACTTAGTACCTACCGATCTGGT  
AGTAGTGCAAACACTAGTTGTAAGGCCACGAAGGATGCCAGAAAGGTACCCATAGGTAACAAGCGACACTATGGATCTG  
ATCTGGGGCCAGGTACCTCTATCTTGGTGATCTGGTTAAAAAACGCTCTAGTGGGCCAAAACCCGGGGGGGATCCCCGGTTT  
CCTTTTATTTCATATCTGCAATACTCTTAATTGTCTCCATAGTGGCATTGATAAAAATAAAAGGAAACCGGGGATCCCC  
CCGGGTTTGGCCCACTAGACGTTTTTTTAAACCAGATCACCAAGATAGAGGTACCTGGCCCCAGATCAGATCCATAGTGTG  
CTTGTACCTATGGGTACCTTCTGGGCATCCTTCGTGGGCCCTTACAACACTAGTGTTTGCACTACTACCAGATCGGTAGGTA  
CTAAGAACTTCCCAAAC

>SRR2298573.48192 48192 length=500

GAAACCGGGGATCCCCCGGGTTTGGCCCACTAGACGTTTTTTTAAACCAGATCACCAAGATAGAGGTACCTGGCCCCAGA  
TCAGATCCATAGTGTGCTTGTACCTATGGGTACCTTCTGGGCATCCTTCGTGGGCCTTACAACACTAGTGTTTGCACTAC  
TACCAGATCGGTAGGTACTAAGTATCTTCCACAACATCTCAGGTTTAGAACCAATCCTAAAGGGTTTGTAAACCTTGGC  
TTTTGGCCCCCTATTGCCAGCGGAACAACACCTGGTAACAGGTGCCTCTGGGGCCAAAAGCCAAGGTTTAAACAAACCT  
TTAGGATTGGTTCTAAACCTGAGATGTTGTGGAAGATACTTAGTACCTACCGATCTGGTAGTAGGGCAAACACTAGTTGT  
AAGGCCACGAAGGATGCCAGAAAGGTACCCATAGGTAACAAGCGACACTATGGAACCTGATCTGGGGCCAGGTACCTCTA  
TCTTGGGGCTCTGGTTAAAA

>SRR2298573.42949 42949 length=500

GAAACCGGGGATCCCCCGGGTTTGGCCCACTAGACGTTTTTTTAAACCAGATCACCAAGATAGAGGTACCTGGCCCCAGA  
TCAGATCCATAGTGTGCTTGTACCTATGGGTACCTTCTGGGCATCCTTCGTGGGCCTTACAACACTAGTGTTTGCACTAC  
TACCAGATCGGTAGGTACTAAGTATCTTCCACAACATCTCAGGTTTAGAACCAATCCTAAAGGGTTTGTAAACCTTGGC  
TTTTGGCCCCGAACAACACCTGGTAACAGGTGCCTCTGGGGCCAAAAGCCAAGGTTTAAACAAACCTTTAGGATTGGTT  
TAAACCTGAGATGTTGTGGAAGATACTTAGTACCTACCGATCTGGTAGTAGTGCAAACACTAGTTGTAAGGCCACGAAG  
GATGCCAGAAAGGTACCCATAGGTAACAAGCGACACCATGGATCTGATCTGGGGCCAGGAACCTCTAACTTGGGGATCTG  
GTTAAAAAACGGCTAGTGGG

>SRR2298573.25832 25832 length=500

CTTTAGGATTGGTTCTAAACCTGAGATGTTGTGGAAGATACTTAGTACCTACCGATCTGGTAGTAGTGCAAACACTAGTT  
GTAAGGCCACGAAGGATGCCAGAAAGGTACCCATAGGTAACAAGCGACACTATGGATCTGATCTGGGGCCAGGTACCTC  
TATCTTGGTGATCTGGTTAAAAAACGTTAGTGGGGCCAAAACCCGGGGGGATCCCCGGTTTCTTTTATTTTATCAATGC  
CACAATGGAGCTCTTAATTGTCTCCATAGTGGCATTGATAAAAATAAAAGGAAACCGGGGATCCCCCGGGTTTGGCCCA  
CTAGACGTTTTTTTAAACCAGATCACCAAGATAGAGGTACCTGGCCCCAGATCAGATCCATAGTGTGCTTGTACCTATGG  
GTACCTTCTGGGCATCCTTCTTGGGCCCTTACAACACTAGGTTTGTACTACAACCAATAGGCAGGTACTAAGTACCTTCCC  
CAAAATCTCAGGTTTTGAACT

>SRR2298573.22802 22802 length=500

CACACAGCCATCCTCTAGTAAGTTTGTGAGACGTCTGGTGACGTGTGGGAACCTTATTGGAAACAACATTTTGTCTGTAAG  
CATCCTATTGCCAGCGGAACAACACCTGGTAACAGGTGCCTCTGGGGCCAAAAGCCAAGGTTTAAACAAACCTTTAGGAT  
TGGTTCTAAACCTGAGATGTTGTGGAAGATACTTAGTACCTACCGATCTGGTAGTAGTGCAAACACAAGTTGAAAGGCC  
ACGAAGGATGCCAAGATAGAGGTACCTGGCCCCAGATCAGATCCATAGTGTGCTTGTACCTATGGGTACCTTCTGGGC  
ATCCTTCGTGGGCCTTACAACACTAGTGTTTGCACTACTACCAGATCGGTAGGTACTAAGTATCTTCCACAACATCTCAGGT

TTAGAACCAATCCTAAAAGGGTTTGTAAACCTTGGCTTTTGGCCCCAGAGGCACCTGTTACCAGGGGTGGTCCGCTGGC  
AATAGGAGGCTTTACAGCAA  
>SRR2298573.22004 22004 length=500  
ATCCTATTGCCAGCGGAACAACACCTGGTAACAGGTGCCTCTGGGGCCAAAAGCCAAGGTTTAAACAAACCTTTAGGATT  
GGTTCATAACCTGAGATGTTGTGGAAGGTACTTAGTACCTACCGATCTGGTAGTAGTGCAAACACTAGTTGTAAGGCCCA  
CGAAGGATGCCAGAAGGTACCCATAGGTAACAAGCGACACTATGGATCTGATCTGGGGCCAGGTACCTCTATCTTGGTG  
ATCTGGTTAAGGCATTGATAAAAATAAAAGGAAACCGGGGACCCCCCGGGTTTGGCCCACTAGACGTTTTTTAACCAGA  
TCACCAAGATAGAGGTACCTGGCCCCAGATCAGATCCATAGTGTGCTTGTACCTATGGGTACCTTCTGGGCATCCTTC  
GTGGGCTTAAAAGTGTGTTGCACTACTACCAGATCGGTAGGAACTAAGAACCCTTCCACAAAATCCCAGGTTTAGAAC  
CAATCCTAAAAGGGTTGTTA  
>SRR2298573.21098 21098 length=500  
CTTCGTGGGCCCTTACAACACTAGTGTTCGACTACTACCAGATCGGTAGGTACTAAGTATCTTCCACAACATCTCAGGTTTA  
GAACCAATCCTAAAAGGGTTTGTAAACCTTGGCTTTTGGCCCCAGAGGCACCTGTTACCAGGTGTTGTTCCGCTGGCAAT  
AGGATGCTTTACAGCAAAAATGTTGTTTCCAATAAGTTCCACACGTCACCAAACGTCACAAAACCTACTAGAGGATGGC  
TGTGTGAGCACAATGGCGTGCCATAGCTCTATTAGTGAGATACCATGCTTGTGGACCTTATGCTCACACAGCCATCCTC  
TAGTAAGTTTGTGAGACGTCGTTGACGTTGGGAACTTATTGGAACAACATTTTGTGTAAAGCATCCTATTGCCAGC  
GGAACAACACCTGGTAACAGTGGCTCTGGGGCCAAAAGCCAAGGTTTAAACAAACCTTTAGGATTGGTTCTAAACCTGA  
GATGTTGTGGAAGATACTTA  
>SRR2298573.20649 20649 length=500  
GGTTTAAACAAACCTTTAGGATTGGTTCTAAACCTGAGATGTTGTGGAAGATACTTAGTACCTACCGATCTGGTAGTAGT  
GCAAAACACTAGTTGTAAGGCCACGAAGGATGCCAGAAAGGTACCCATAGGTAACAAGCGACACTATGGATCTGATCTGG  
GGCCAGGTACCTCTATCTTGGTGATCTGGTTAAAAAACGTCAGTGGGCCAAAACCCGGGGGGGATCCCCGGTTTCTTTT  
ATTTTATCAACTCTTAATTTGCTCCATAGTGGCATTGATAAAAATAAAAGGAAACCGGGGATCCCCCGGGTTTGGCCCA  
CTAGACGTTTTTTAACCAGATCACCAGATAGAGGTACCTGGCCCCAGATCAGATCCATAGTGTGCTTGTACCTATGG  
GTACCTTCTGGGCATCCTTCGTGGGCCCTTACAACACTAGTGTTCGACTACTACAAGATCGGTAGGAACAAAGAACTTCCA  
CAACATCCCAGGTTTAGAAC  
>SRR2298573.19115 19115 length=500  
ATCCATAGTGTGCTTGTACCTATGGGTACCTTCTGGGCATCCTTCGTGGGCCCTTACAACACTAGTGTTCGACTACTACC  
AGATCGGTAGGTACTAAGTATCTTCCACAACATCTCAGGTTTAGAACCAATCCTAAAAGGGTTTGTAAACCTTGGCTTTT  
GGCCCCAGAGGCACCTGTTACCAGGTGTTGTTCCGCTGGCAATAGGATGCTTTACAGCAAAAATGTTGTTTCCAATAAGTT  
CCCACACGTCGGTAAGTCGGTGAGACGTCGTTGACGTTGGGAACTTATTGGAAACAACATTTTGTGTAAAGCATCCT  
ATTGCCAGCGGAACAACACCTGGTAACAGGTGCCTCTGGGGCCAAAAGCCAAGGTTTAAACAAACCTTTAGGATTGGTTC  
TAAACCTGAGATGTTGTGGAAGATACTTAGTACCTACCGATCTGGTAGTAGTGCAAAACACTAGTTGTAAGGCCACGAAG  
GATGCCAGAAAGGTACCCAA  
>SRR2298573.12663 12663 length=500  
GAACAACACCTGGTAACAGGTGCCTCTGGGGCCAAAAGCCAAGGTTTAAACAAACCTTTAGGATTGGTTCTAAACCTGAG  
ATGTTGTGGAAGATACTTAGTACCTACCGATCTGGTAGTAGTGCAAAACACTAGTTGTAAGGCCACGAAGGATGCCCAGA  
AGGTACCCATAGGTAACAAGCGACACTATGGATCTGATCTGGGGCCAGGTACCTCTATCTTGGTGATCTGGTTAAAAAAC  
GTCTAGTGGGGGCATTGATAAAAATAAAAGGAAACCGGGGATCCCCCGGGTTTGGCCCACTAGACGTTTTTTAACCAGA  
TCACCAAGCTAGAGGTACCTGGCCCCAGATCAGATCCATCGTGTGCTAGTTACCTATGGGCACCTTCTGGGCATCCTTC  
GTCGGCTTACACGCAGTGTTCGACTACTACCAGATCGGTAGGGACTAAGGATTTTCCACAACATCACAGGGTTAGAAC  
CAATCCTAAAAGGGTTGTTA  
>SRR2298573.7958 7958 length=500  
GGCATTGATAAAAATAAAAGGAAACCGGGGATCCCCCGGGTTTGGCCCACTAGACGTTTTTTAACCAGATCACCAGAT  
AGAGGTACCTGGCCCCAGATCAGATCCATAGTGTGCTTGTACCTATGGGTACCTTCCGGGCATCCTTCGTGGGCCCTTA  
CAACTAGTGTTCGACTACTACCAGATCGGTAGGTACTAAGAACTTCCCAACATCTCAGGTTTAAAAACCAATCCTAAA  
GGGTTTGTATTGTGGACCTTATGCTCACACAGCCATCCTCTAGTAAGTTTGTGAGACGTCGTTGACGTTGGGAACTT  
ATTGGAAACAACATTTTGTGTAAAGCATCCTATTGCCAGCGGAACAACACCTGGTAACAGGTGCCTCTGGGGCCAAAAG  
CCAAGGTTTAAACAAACCTTTAGGATTGGTTCTAAACCTGAGATGTTGTGGAAGATACTTAGAACCTACCGATCTGGTAG  
TAGTGCAAAACACTAGTTGTA  
>SRR2298566.575132 575132 length=500  
GGTTACATTGTCATAAATACCAACGCTTGACCGAATACCTTAGGATTTTGAAGTCCAATTGCAATAAGCTACCCAATA  
TGGTTACATCAACTTGTGTAGCAGAACCTGAAGGAATGGATAAAGGTGTCCAAACATAGACTTTTAGTTGCCCTAAGACT  
GACGAATATGTTTTAAAATAGTTTGTGTCAGCAACATAAAGGATACATAAATCAGCCTAAGTGGTATCAGCCAAAATTCAT  
CAACCCATGGGTTGTGACATATGACTCAAAGTTAGAATTTGGAGCATTTACCAATCTACCACATGTGTTGATGAATTTGG  
CTGAGACCACACAGGCTGATTTATGTATCCCCTATGTTGCTGACACAAAACACTATGTTAAAAACAGATTTCGTGAGACTTAGGG  
CAACTAAAAGTCTATGTTTGGACACCTTTATCCATACCTTCAGGTTCTGCTACACAAGTTGATGTAACCATATTTGGGTAG  
CTTATTGCAATTTGGACTTCC  
>SRR2298566.451439 451439 length=500

CTTGTGTAGCAGAACCTGAAGGTATGGATAAAAGGTGTCCAAACATAGACTTTTAGTTGCCCTAAGTCTGACGAATCTGTT  
TTAACATAGTTTGTGTGTCAGCAACATAGGGGATACATAAAATCAGCCTGTGTGGTCTCAGCCAAATTCATCAACACATGTGG  
TAGATTGGTAAATGCTCCAAATTTCTAACTTTGAGTCATATGTCACAACAGGTTTGGGTTTCATACACAACCAATGCACTAC  
CAGCTGTTCCGTACAAGTGAATGTTAATCAAGGAACAGCTGGTAGTGCATTTGGTGGTGTATGAACCCAAACCTGTTGTGA  
CATATGACTCAAAGTTAGAATTTGGAGCATTTACCAATCTACCACATGTGTTGATGAATTTGGCTGAGACCACACAGGCT  
GATTTATGTATCCCTATGTTGCTGACACAACTATGTTAAAACAGATTCGTCAGACTTAGGGCAACTAAAAGCCTATGT  
TTGGACACCTTTATCCATAC

>SRR2298566.378213 378213 length=500

ACCCAAACCTGTTGTGACATATGACTCAAAGTTAGAATTTGGAGCATTTACCAATCTACCACATGTGTTGATGAATTTGG  
CTGAGACCACACAGGCTGATTTATGTATCCCCTATGTTGCTGACACAACTATGTTAAAACAGATTCGTCAGACTTAGGG  
CAACTAAAAGTCTATGTTTGGACACCTTTATCCATACCTTCAGGTTCTGCTACACAAGTTGATGTAACCATATTGGGTAG  
CTTATTGCAAGTTCATAGAACCTGGCCCTTCTGCAATGTCAATTTTTCCCTAGTCCAATTTGATTTAGTGCTCATTTGTA  
AGAGTCTTTTTTAGGTTTTGTTTCCGCGTTGGTGCATTTGTCATAAATACCAACGCTCTTGACCGAATACCCTAGGATTTTG  
GAAGTCCAATTTGCAATAAGCTACCCAATATGGTTACATCAACTTGTGTAGCAGAACTGAAGGTATGGATAAAGGGGTCC  
CAACCAAAACATTTAGTTGC

>SRR2298546.989298 989298 length=500

CTTCTGCAATGTCAATTTTTCCCTTAGTCCACTTGTATTTAGTGCTCATTTGTAAGAATTTTCTTAAGATTTTGCTTCCGC  
GTTGGTGCATTTGTCATAAATACCAACGCTTGACCGAATACCCTAGGATTTTGGAAAGTCCAATTTGCAATAAGCTACCCAA  
TATGGTAACATCAACTTGTGTAGCAGAACCTGAAGGTATGGATAAAAGGTGTCCAAACATAGACTTTTAGTTGCCCTAAGT  
CTGACGAATGACTCAAAGTTAGAATTTGGAGCGTTTACCAATTTACCACATGTGTTGATGAATTTGGCTGAGACCACACA  
GGCTGATTTATGTATCCCTATGTTGCTGACACAACTATGTTAAAACAGATTCGTCAGACTTAGGGCAACTAAAAGTCT  
ATGTTTGGACACCTTTATCCATACCTTCAGGTTCTGCTACACAAGTTGATGTTACCATATTTGGGTAGCTTATTTGCAATTG  
GACTTCCAAAATCCTAGGGT

>SRR2298546.892755 892755 length=500

ATGTTAATCAAGGAACAGCCGTAGTGCATTTGGTGTGATGAACCCAAACCTGTTGTGACATATGACTCAAAGTTAGAA  
TTTGGAGCGTTTACCAATTTACCACATGTGTTGATGAATTTGGCTGAGACCACACAGGCTGATTTATGTATCCCTATGT  
TGCTGACACAACTATGTTAAAACAGATTCGTCAGACTTAGGGCAACTAAAAGTCTATGTTTGGACACCTTTATCCATAC  
CTTCAGGTTCCCTAGGATTTTGGAAAGTCCAATTTGCAATAAGCTACCCAATATGGTAACATCAACTTGTGTAGCAGAACCT  
GAAGGTATGGATAAAGGTGTCCAAAACATAGACTTTTAGTTGCCCTAAGTCTGACGAATCTGTTTAAACATAGTTTGTGTC  
AGCAACATAGGGGATACATAAATCAGCCTGTGTGGTCTCAGCCAAATTCATCAACACATGTGGTAAATTTGGTAAACGCTC  
CAAATTTCAACTTTGAGTCA

>SRR2298546.846783 846783 length=501

GTAGTGCATTTGGTGGTGTATGAACCCAAACCTGTTGTGACATATGACTCAAAGTTAGAATTTGGAGCGTTTACCAATTTA  
CCACATGTGTTGATGAATTTGGCTGAGACCACACAGGCTGATTTATGTATCCCTATGTTGCTGACACAACTATGTTAA  
AACAGATTCGTCAGACTTAGGGCAACTAAAAGTCTATGTTTGGACACCTTTATCCATACCTTCAGGTTCTGCTACACAAG  
TTGATGTTACTGTATTTAGTGCTCATTTGTAAGAATTTTCTTAAGATTTTGTCTCCGCGTTGGTGCATTTGTCATAAATACC  
AACGCTCTTGACCGAATACCCTAGGATTTTGGAAAGTCCAATTTGCAATAAGCTACCCAATATGGTAACATCAACTTGTGTAG  
CAGAACCTGAAGGTATGGATAAAGGTGTCCAAAACATAGACTTTTAGTTGCCCTAAGTCTGACGAATCTGTTTAAACATAG  
TTTGTGTGTCAGCAACATAGGGG

>SRR2298546.823945 823945 length=502

GTGTAGCAGAACCTGAAGGTATGGATAAAGGTGTCCAAAACATAGACTTTTAGTTGCCCTAAGTCTGACGAATCTGTTTTTA  
ACATAGTTTGTGTGTCAGCAACATAGGGGATACATAAATCAGCCTGTGTGGTCTCAGCCAAATTCATCAACACATGTGGTAA  
ATTTGGTAAACGCTCCAAATTTCACTTTGAGTCATATGTCACAACAGGTTTGGGTTTCATACACCACCAATGCACTACCGG  
CTGTTCCCTGAGAGAAAAATCCTAGCAAAATTTGGTTAGATTTGGAGACACATGAGTGGACACCAACCTGGGCTAGAGGACAT  
CAGATAACCCATGTGGAACTACCAAAAAGTCTTTTTGGGACAAAAACAGCAAGCCAGCCTATGGCCAATCAAGATACTTTGC  
AGCAGTACGGTGTGGTTTTTCATTTTTCAAGTACAAGTGAATGTTAATCAAGGAACAGCCGGTAGTGCATTTGGTGGTGTATG  
AACCCAAACCTGTTGTGACATA

>SRR2298546.818952 818952 length=500

AAACAATACTTTGCTGTAAAGCATCCTATTGCCAGCGGAACAACACCTGGTAACAGGTGCCTCTGGGGCCAAAAGCCAAG  
GTTTAAACAAACCTTTAGGATTTGGTTATAAACCTGAGGTGTTGTGGAAGATACTTAGTACCTACCGATCTGGTAGTAGTG  
CAAACACTAGTTGTAAGGCCACGAAGGATGCCAGAAGGTACCCATAGGTAACAAGTGACACTATGGATCTGATTTGGG  
GCCAGGTACCAAGATAGAGGTACCTGGCCCCAAATCAGATCCATAGTGTCACTTGTACCTATGGGTACCTTCTGGGCA  
TCCCTCGTGGGCCCTACAACCTAGTGTGTTGCACTACTACCAGATCGGTAGGTACTAAGTATCTTCCACAACACCTCAGGTT  
TATAACCAATCCTAAAGGGTTTGTAAACCTTTGGCTTTTTGGCCCCAGAGGCACCTGTTACCAGGTGTTGTTCCGCTGGCA  
ATAGGATGCTTTACAGCAA

>SRR2298546.568253 568253 length=501

GCAATTTGATTTGCGCTGCAGTGGTACTCAATACGTTCCGCATGTTTCATAGAACCTGGCCCTTCTGCAATGTCAATTTTTCC  
CCTAGTCCACTTGTATTTAGTGCTCATTTGTAAGAATTTTCTTAAGATTTTGGCTTCCGCGTTGGTGCATTTGTCATAAATAC  
CAACGCTTTGACCGAATACCCTAGGATTTTGGAAAGTCCAATTTGCAATAAGCTACCCAATATGGTAACATCAACTTGTGTA

GCAGAACCTGACAAGTGAATGTTAATCAAGGAACAGCCGGTAGTGCAATTGGTGGTGTATGAACCCAAACCTGTTGTGACA  
TATGACTCAAAGTTAGAATTTGGAGCGTTTACCAATTTACCACATGTGTTGATGAATTTGGCTGAGACCACACAGGCTGA  
TTTATGTATCCCTATGTTGCTGACACAAACTATGTTAAAAACAGATTCGTCAGACTTAGGGCAACTAAAAAGTCTATGTTT  
GGACACCTTTATCCATAACCTT

>SRR2298546.429759 429759 length=502

CCCTAGGATTTTGGAAAGTCCAATTGCAATAAGCTACCCAATATGGTAACATCAACTTGTGTAGCAGAACCTGAAGGTATG  
GATAAAGGTGTCCAAACATAGACTTTTAGTTGCCCTAAGTCTGACGAATCTGTTTTAACATAGTTTGTGTGACCAACATA  
GGGATACATAAAATCAGCCTGTGTGGTCTCAGCCAAATTCATCAACACATGTGGCAAATTTGGTAAACGCTCCAAATTCCTA  
ACTTTGAGTCAAGTGAATGTTAATCAAGGAACAGCCGGTAGTGCAATTGGTGGTGTATGAACCCAAACCTGTTGTGACATA  
TGACTCAAAGTTAGAATTTGGAGCGTTTACCAATTTGCCACATGTGTTGATGAATTTGGCTGAGACCACACAGGCTGATT  
TATGTATCCCTATGTTGCTGACACAAACTATGTTAAAAACAGATTCGTCAGACTTAGGGCAACTAAAAAGTCTATGTTTGG  
ACACCTTTATCCATAACCTTCAG

>SRR2298546.424373 424373 length=501

CTCCGGTTGCCATATCTGCAATACTCTTAATTTGCTCCATAATGGCATTGATAAAAATAAAAGGAAACCGGGGATCCCCC  
CGGGTTTGGCCACTAGACGTTTTTTAACCAGATCACCAAGATAGAGGTACCTGGCCCCAAATCAGATCCATAGTGTAC  
TTGTTACCTATGGGTACCTTCTGGGCATCCTTCGTGGGCCTTACAAC TAGTGTTCGACTACTACCAGATCGGTAGGTAC  
TAAGTATCTTTTGGCTGTAAAGCATCCTATTTGCCAGCGGAACAACACCTGGTAACAGGTGCCCTCGGGGCCAAAAGCCAAG  
GTTTAAACAAACCTTTAGGATTTGGTTATAAACCTGAGGTGTGTGGAAGATACTTAGTACCTACCAGATCGGTAGTAGTG  
CAAACACTAGTTGTAAGGCCACGAAGGATGCCAGAAAGGTACCCATAGGTAACAAGTGACACTATGGATCTGATTTGGG  
GCCAGGTACCTCTATCTTGGT

>SRR2298546.317425 317425 length=500

GCAGAACCTGAAGGTATGGATAAAGGTGTCCAAACATAGACTTTTAGTTGCCCTAAGTCTGACGAATCTGTTTTAACATA  
GTTTGTGTGACCAACATAGGGGATACATAAAATCAGCCTGTGTGGTCTCAGCCAAATTCATCAACACATGTGGTAAATTTGG  
TAAACGCTCCAAATTCCTAATTTGAGTCATATGTCACAACAGGTTTGGGTTTATACACCACCAATGCACTACCGGCTGT  
CCTTGATTAAAGCAAAAACAGCAAGCCAGCCTATGGCCAAATCAAGATACTTTGCAGCAGTACGGTGTGGTTTTTCAATTTT  
AAGTACAAGTGAATGTTAATCAAGGAACAGCCGGTAGTGCAATTGGTGGTGTATGAACCCAAACCTGTTGTGACATATGAC  
TCAAAGTTAGAATTTGGAGCGTTTACCAATTTACCACATGTGTTGATGAATTTGGCTGAGACCACACAGGCTGATTTATG  
TATCCCTATGTTGCTGACA

>SRR2298546.264343 264343 length=501

CGTCTTGACCGAATACCCTAGGATTTTGGAAAGTCCAATTGCAATAAGCTACCCAATATGGTAAACATCAACTTGTGTAGCA  
GAACCTGAAGGTATGGATAAAGGTGTCCAAACATAGACTTTTAGTTGCCCTAAGTCTGACGAATCTGTTTTAACATAGTT  
TGTGTGACCAACATAGGGGATACATAAAATCAGCCTGTGTGGTCTCAGCCAAATTCATCAACACATGTGGTAAATTTGGTAA  
ACGCTCCAAATGTAGTGCAATTGGTGGTGTATGAACCCAAACCTGTTGTGACATATGACTCAAAGTTAGAATTTGGAGCGT  
TTACCAATTTACCACATGTGTTGATGAATTTGGCTGAGACCACACAGGCTGATTTATGTATCCCTATGTTGCTGACACA  
AACTATGTTAAAAACAGATTCGTCAGACTTAGGGCAACTAAAAAGTCTATGTTTGGACACCTTTATCCATAACCTTCAGGTT  
TGCTACACAAGTTGATGTTAC

>SRR2298382.75729 75729 length=501

GTGCCCTCGGGGCCAAAAGCCAAGGTTTAAACAAACCTTTAGGATTTGGTTCTAAACCTGAGATGTTGTGGAAGATACTTA  
GTACCTACCAGATCTGGTAGTAGTGCAAAACACTAGTTTGTAAAGGCCACGAAGGATGCCAGAAAGGTACCCATAGGTAACAA  
GCGACACTATGGATCTGATCTGGGGCCAGGTACCTCTATCTTGGTGTATCTGGTTAAAAAACGTTAGTGGGCCAAAACCCG  
GGGGGATCCATCTGCAATACTCTTAATTTGTCTCCATAGTGGCATTGATAAAAATAAAAGGAAACCGGGGATCCCCCCGG  
GTTTGGCCACTAGACGTTTTTTAACCAGATCACCAAGATAGAGGTACCTGGCCCCAGATCAGATCCATAGTGTGCTGTTG  
TTACCTATGGGTACCTTCTGGGCATCCTTCGTGGGCCTTACAAC TAGTGTTCGACTACTACCAGATCGGTAGGTACTAA  
GAATCTTCCACAACATCTCAG

>SRR2298382.11686 11686 length=501

ACACCTGGTAAACAGGTGCCCTCGGGGCCAAAAGCCAAGGTTTAAACAAACCTTTAGGATTTGGTTCTAAACCTGAGATGTT  
GTGGAAGATACTTAGTACCTACCAGATCTGGTAGTAGTGCAAAACACTAGTTTGTAAAGGCCACGAAGGATGCCAGAAAGGTA  
CCCATAGGTAACAAGCGACACTATGGATCTGATCTGGGGCCAGGTACCTCTATCTTGGTGTATCTGGTTAAAAAACGTTCTA  
GTGGGCCAAAAGCAATACTCTTAATTTGTCTCCATAGTGGCATTGATAAAAATAAAAGGAAACCGGGGATCCCCCCGGGTTT  
GGCCACTAGACGTTTTTTAACCAGATCACCAAGATAGAGGTACCTGGCCCCAGATCAGATCCATAGTGTGCTGTTTAC  
CTATGGGTACCTTCTGGGCATCCTTCGTGGGCCTTACAAC TAGTGTTCGACTACTACCAGATCGGTAGGTACTAAGTAT  
CTTCCACAACATCTCAGGTTA

>SRR2298578.1031647 1031647 length=500

ACCTGAAGGTATGGATAAAGGTGTCCAAACATAGACTTTTAGTTGCCCTAAGTCTGACGAATCTGTTTTAACATAGTTTG  
TGTCAGCAACATAGGGGATACATAAAATCAGCCTGTGTGGTCTCAGCCAAATTCATCAACACATGTGGTAGATTGGTAAAT  
GCTCCAAATTTCTAATTTTGGAGTCATATGTCACAACGGGTTTGGGTTTATACACCACCAATGCACTACCAGCTGTTCCCTG  
ATTAACATTTATTTTTAACCAGATCACCAAGATAGAGGTACCTGGCCAGGGCGTTGGTGCATTTGTCATAAATACCAACGT  
CCTGGCCGAATACCCTAGGGTTTTTGGAAAGTCCAATTGCAATAAGCTACCCAATATGGTTACATCAACTTTGGGTAGCAGTA  
CGGTGTGGTTTTTCACTTTCAAGTGAAGGGAATGTTAATCAAGGAACAGCTGGTAGTGCAATTGGTGGTGTATGAACCCAA

ACCCGTTGGGCAATATTACC  
>SRR2298578.969663 969663 length=500  
GTGCATTTGGTGGTGTATGAACCCAAACCCGTTGTGACATATGACTCAAAGTTAGAATTTGGAGCATTACCAATCTACCA  
CATGTGTTGATGAATTTGGCTGAGACCACACAGGCTGATTTATGTATCCCCTATGTTGCTGACACAACTATGTTAAAAC  
AGATTCGTCAGACTTAGGGCAACTAAAAGTCTATGTTTGGACACCTTTATCCATACCTTCAGGTTCTGCTACACAAGTTG  
ATGTAACCAACCAACGTCTCGGCCGAATACCTTAGGGTTTTGGAAGTCCAATTGCAATAGGCTACCCAATATGGTTACAT  
CAACTTGTGTAGCAGAACCTGAAGGTATGGATAAAGGTGTCCAAACATAGACTTTTAGTTGCCCTAAGTCTGACGAATCT  
GTTTTAACATAGTTTGTGTCAGCAACATAGGGGATACATAAAATCAGCCTGTTTGGTCTCAGCCAAATTCATCAACACATG  
GGGAAAGATTGGAAAAGGCTC  
>SRR2298578.960513 960513 length=500  
GGATAAAGGTGTCCAAACATAGACTTTTAGTTGCCCTAAGTCTGACGAATCTGTTTTAACATAGTTTGTGTCAGCAACAT  
AGGGGATACATAAATCAGCCTGTGTGGTCTCAGCCAAATTCATCAACACATGTGGTAGATTGGTAAATGCTCCAAATTTCT  
AACTTTGAGTCATATGTCACAACGGGTTTGGGTTTCATACACCACCAATGCACTACCAGCTGTTCTTGATTAACATTCAC  
TTGCACTTGACAAAAGTCTTTTGGGACAAAAACAGCAAGCCAGCCTATGGCCAATCAAGATACTTTGCAGCAGTACGGTG  
TGGTTTTCACTTTCAAGTGCAAGTGAATGTTAATCAAGGAACAGCTGGTAGTGCATTGGTGGTGTATGAACCCAAACCAG  
TTGTGACATATGACTCAAAGTTAGAATTTGGAGCAATTACCAAATACCAAATGGGTTGATGAAATTTGGCTGAGACCAA  
CCAGATGGTTTATGAAACCC  
>SRR2298578.398520 398520 length=500  
GTCCAATTGCAATAAGCTACCCAATATGGTTACATCAACTTGTGTAGCAGAACCTGAAGGTATGGATAAAGGTGTCCAAA  
CATAGACTTTTAGTTGCCCTAAGTCTGACGAATCTGTTTTAACATAGTTTGTGTCAGCAACATAGGGGATACATAAAATCA  
GCCTGTGTGGTCTCAGCCAAATTCATCAAAAACATGTGGTAGATTGGTAAATGCTCCAAATTTCTAACTTTGAGTCATATGT  
CACAACGGGTTCTGGGTTACGGTGTGGTTTTCACTTTCAAGTGAAGTGAATGTTAATCAAGGAACAGCTGGTAGTGCATT  
GGTGGTGTATGAACCCAAACCCGTTGTGACATATGACTCAAAGTTAGAATTTGGAGCATTACCAATCTACCACATGTGT  
TGATGAAATTTGGCTGAGACAACACAGGCTGATTTATGTATCCCCTATGTTGCTGACACAAACCATCTTAAAACAGATTCC  
TCAGACTTAGGGCAACTAAA  
>SRR2298578.380777 380777 length=500  
GTGCATTTGGTGGTGTATGAACCCAAACCCGTTGTGACATATGACTCAAAGTTAGAATTTGGAGCATTACCAATCTACCA  
CATGTGTTGATGAATTTGGCTGAGACCACACAGGCTGATTTATGTATCCCCTATGTTGCTGACACAACTATGTTAAAAC  
AGATTCGTCAGACTTAGGGCAACTAAAAGTCTATGTTTGGACACCTTTATCCATACCTTCAGGTTCTGCTACACAAGTTG  
ATGTAACCAAGCAATAAGCTACCCAATATGGTTACATCAACTTGTGTAGCAGAACCTGAAGGTATGGATAAAGGTGTCCA  
AACATAGACTTTTAGTTGCCCTAAGTCTGACGAATCTGTTTTAACATAGCTTGTGTCAGCAACATAGGGGATACATAAAT  
CAGCCTGTGTGGTCTCAGCCAAATTCATCAACACATGTGGAAGATTGGTAAATGCTCCAAATTTCTAACTTTAAGGCAAT  
GTAACAACGGGTTTGGGTTA  
>SRR2298578.377864 377864 length=500  
CGATTGCCCTTGGTTGGAGAAAGGGCATTCTATGACCCAAGAACAGCAGGAAGCAAGAGTAGGTTTGTATGATTTAGTAAAA  
ATATCTCAACTTTTTTCTGTGATGAGTACTCAACAACCCCTTCAGCCAACCATGGTATAGATGCAAAAAGGCTATTTTTAA  
GTGGTCATCCACAACAGCACCCAGTCTGTAGTGCATAGGAAAAATGTTTATCTAAAAATGTTTCCCAACTTGAATGTTT  
TTGTCAACAGGCTACTCATATTTTAGAGGATCAATAGTGTGCTGAGGTTGAGCGTATATGCCAGCACTATTGATCCTCTAAA  
ATATGAGTAGCTGTTGACAAAAACATTTCAAGTTGGGAAAACATTTTAGATAAAACATATTCCTATGCACTACAGACTGTG  
GGGCTGTTGTGGATGACCACTTAAAATAGCCTTTTGCATCTATACCATGGTTGGCTGAAGGGGGTGTGAGTCACTCATC  
ACAGAAAAAAGTTGAGAAAA  
>SRR2298578.142685 142685 length=500  
ACCCAATATGGTTACATCAACTTGTGTAGCAGAACCTGAAGGTATGGATAAAGGTGTCCAAACATAGACTTTTAGTTGCC  
CTAAGTCTGACGAATCTGTTTTAACATAGTTTGTGTCAGCAACATAGGGGATACATAAATCAGCCTGTGTGGTCTCAGCC  
AAATTCATCAACACATGTGGTAGATTGGTAAATGCTCCAAATTTCTAACTTTGAGTCATATGTCACAACGGGTTTGGGTTT  
ATAACCACCAATCCTAGCAAAATGGTTAGATTGGAGACACATGAGTGGACACCAACCTGGGCTAGAGGACATCAGATAAC  
TCATGTGGAATTACCAAAAAGTCTTTTGGGACAAAAACAGCAAGCCAGCCTATGGCCAATCAAGATACTTTGCAGCAGTAC  
GGTGTGGTTTTCACTTTCAAGTGCAAGTGAATGTTAATCAAGGAACAGCTGGAAAGTGCATTGGTGGTGTATGAACCCAAA  
CCCGTTGTGACAAATGACTC  
>SRR2298578.41611 41611 length=500  
ACCCAATATGGTTACATCAACTTGTGTAGCAGAACCTGAAGGTATGGATAAAGGTGTCCAAACATAGACTTTTAGTTGCC  
CTAAGTCTGACGAATCTGTTTTAACATAGTTTGTGTCAGCAACATAGGGGATACATAAATCAGCCTGTGTGGTCTCAGCC  
AAATTCATCAACACATGTGGTAGATTGGTAAATGCTCCAAATTTCTAACTTTGAGCCATATGTCACAACGGGTTTGGGTTT  
ATACACCACCAAGCTGATAGGGCATTGGTGGTGCATGAACCCAAACCCGTTGTGACATATGACTCAAAGTTAGAATTTGG  
AGCATATACCAATCTATCAAAATGCGTTGATGAAATTTGGCTGAGACCACACAGGCTGATTTATGTATCCCATATGTTGCTG  
ACACAAACTATGTTAAAACAGATTTCGTGAGACTTAGGGCAACTAAAAGTCTATGTTTGAACAACCTTTATCCATACCATAA  
GGTTCTGCTCAACAAGTTGA  
>SRR2298573.879666 879666 length=500  
GTCTGGTGTGAGTGTGGGAACCTTATTGGAAACAACATTTTGTCTGTAAGCATCCTATTGCCAGCGGAACAACACCTGGTAA

CAGGTGCCTCTGGGGCCAAAAGCCAAGGTTTAAACAAACCCTTTAGGATTGGTTCTAAACCTGAGATGTTGTGGAAAGATAC  
TTAGTACCTACCGATCTGGTAGTAGTGCAAACTAGTTGTAAGGCCACGAAAGGATGCCAGAAAGGTACCCATAGGTAA  
CAAGCGACAAAATTGATAGTGGAAATCAACTGAACTGACCACTCCGGTCCGCATATCTGCAATACTCTTAATTGTCTCCATA  
GTGGCATTGATAAAAATAAAAGGAAAACCGGGGATCCCCCGGGTTTGGCCCACTAGACGTTTTTTAAACCAGATCACCAAG  
CTAGAGGTACCTGGCCCCAGATCAGATCCATAGTGTGCTGGTTACCATTGGGTACCTTCTGGGAAACCTCCGGGGGCC  
TAAAACAAGTGTTCACCC

>SRR2298573.865740 865740 length=500

CTCATTAACCTACATTGATAGTGGAAATCAACTGAACTGACCACTCCGGTCCGCCTATCTGCAATACTCTTAATTGTCTCCA  
TAGTGGCATTGATAAAAATAAAAGGAAAACCGGGGATCCCCCGGGTTTGGCCCACTAGACGTTTTTTAAACCAGATCACCA  
AGATAGAGGTACCTGGCCCCAGATCAGATCCATAGTGTGCTGGTTACCTATGGGAAACCTTCTGGGAATCCTTCGTGGGC  
CTTACAACCTGTAACAAACCCTTTAGGATTGGTTCTAAACCTGAGATGTTGTGGAAAGATACTTAGTACCTACCGATCTGGT  
AGTAGTGCAAACTAGTTGTAAGGCCACGAAAGGATGCCAGAAAGGTACCCATAGGTAAACAAGCGACACTATGGATCTG  
ATCTGGGGCCAGGTACCTCTATCTTGGGGATCTGGTTAAAAAACGTCATAGTGGGCCAAAACCGGGGGGGATCCCCGGTT  
CCTTTTATTTTATCAATGCC

>SRR2298573.846748 846748 length=500

CCCCCGGGTTTGGCCCACTAGACGTTTTTTAAACCAGATCACCAAGATAGAGGTACCTGGCCCCAGATCAGATCCATAGT  
GTCGCTTGTACCTATGGGTACCTTCTGGGCATCCTTCGTGGGGCCTTACAACCTAGTGTTCGACTACTACCAGATCGGTA  
GGTACTAAGTATCTTCCACAACATCTCAGGTTTAGAACCAATCCTAAAGGGTTTGTAAACCTTGGCTTTTGGCCCCAGA  
GGCACCTGTAGGAGGAAGTTTGTGAGACGTCGTTGACGTTGGGAACTTATTGGAAACAACATTTTGTCTGTAAGCATC  
CTATTGCCAGCGGAACAACACCTGGTAACAGGTGCCTCTGGGGCCAAAAGCCAAGGTTTAAACAAACCCTTTAGGATTGGT  
TCTAAACCTGAGATGTTGTGGAAAGATACTTAGTACCTACCGAACTGGTAGTAGTGCAAAACATAGTTGAAAAGGCCCCGA  
AGGATGCCAGAAAGGTACCC

>SRR2298573.838349 838349 length=500

ATAAAAGGAAACCGGGGATCCCCCGGGTTTGGCCCACTAGACGTTTTTTAAACCAGATCACCAAGATAGAGGTACCTGG  
CCCAGATCAGATCCATAGTGTGCTGTGTACCTATGGGTACCTTCTGGGCATCCTTCGTGGGCCCTTACAACCTAGTGT  
GCACTACTACCAGATCGGTAGGTACTAAGTATCTTCCACAACATCTCAGGTTTAGAACCAATCCTAAAGGGTTTGTAA  
CCTTGGCTTGGGCGTCCGCTGGGGGCAAAAAGCCAAGGTTTAAACAAACCCTTTAGGATTGGTTCTAAACCTGAGATGTTGT  
GGAAGATACTTAGTACCTACCGATCTGGTAGTAGTGCAAACTAGTTGTAAGGCCACGAAAGGATGCCAGAAAGGTACC  
CATAGGTAACAAGCGACACTATGGATCTGATCTGGGGCCAGGGACCTCTATCTTGGGGATCGGTTTAAAAAACGCCTAGG  
GGGCCAAAACCGGGGGGGG

>SRR2298573.837220 837220 length=500

GATCCATAGTGTGCTTGTACCTATGGGTACCTTCTGGGCATCCTTCGTGGGCCCTTACAACCTAGTGTTCGACTACTAC  
CAGATCGGTAGGTACTAAGTATCTTCCACAACATCTCAGGTTTAGAACCAATCCTAAAGGGTTTGTAAACCTTGGCTTT  
TGGCCCCAGAGGCACCTGTTACCAGGGTGGTTCCGCTGGCAATAGGATGCTTTACAGCAAAATGTTGTTTCCAATAAGT  
TCCAAAACGCCCTTGTGGACCTTATGCTCACACAGCCATCCTCTAGTAAGTTTGTGAGACGTCGTTGACGTTGGGAACT  
TATTGGAAACAACATTTTGTCTGTAAGCATCCTATTGCCAGCGGAACAACACCTGGTAACAGGTGCCTCTGGGGCCAAA  
GCCAAGGTTTAAACAAACCCTTTAGGATTGGTTCTAAACCTGAGATGTTGTGGAAGATACTTAGTACCTACCGATCTGGAA  
GTAGTGCAAACTAGTTGA

>SRR2298573.835458 835458 length=500

AGATAGAGGTACCTGGCCCCAGATCAGATCCATAGTGTGCTTGTACCTATGGGTACCTTCTGGGCATCCTTCGTGGGC  
CTTACAACCTAGTGTTCGACTACTACCAGATCGGTAGGTACTAAGTATCTTCCACAACATCTCAGGTTTAGAACCAATCC  
TAAAGGGTTTGTAAACCTTGGCTTTTGGCCCCAGAGGCACCTGTTACCAGGGTGTTCGCTGGCAATAGGATGCTTT  
ACAGCAAAAGGCCATCCTCTAGTAAGTTTGTGAGACGTCGTTGACGTTGGGAACTTATTGGAAACAACATTTTGTCTGT  
AAAGCATCCTATTGCCAGCGGAACAACACCTGGTAACAGGTGCCTCTGGGGCCAAAAGCCAAGGTTTAAACAAACCCTTTA  
GGATTGGTTCTAAACCTGAGAGGTTGGGGAAGCTACTTAGTACCTACCGATCTGGTAGTAATGCAAACTAGTGGTAAG  
GTCCACGAAGGATGCCAGAA

>SRR2298573.832916 832916 length=500

CCTGGTAACAGGTGCCTCTGGGGCCAAAAGCCAAGGTTTAAACAAACCCTTTAGGATTGGTTCTAAACCTGAGATGTTGTG  
GAAGATACTTAGTACCTACCGATCTGGTAGTAGTGCAAACTAGTTGTAAGGCCACGAAAGGATGCCAGAAAGGTACCC  
ATAGGTAACAAGCGACACTATGGATCTGATCTGGGGCCAGGTACCTCTATCTTGGTGATCTGGGTTAAAAACGTCATAGT  
GGCCAAAACCGGTTTGGCCCACTAGACGTTTTTAAACCAGATCACCAAGATAGAGGTACCTGGCCCCAGATCAGATCCAT  
AGTGTGCTTGTACCTATGGGTACCTTCTGGGCATCCTTCGTGGGCCCTTACAACCTAGTGTTCGACTACTACCAGATCG  
GTAGGTACTAAGTATCTTCCACAACATCTCAGGTTTAGAACCAATCCTAAAGGGTTTGTAAACCTTGGCTTTTGGCCCC  
AGAGGCACCTTTACCAGGG

>SRR2298573.815070 815070 length=500

GTTTAAACAAACCCTTTAGGATTGGTTCTAAACCTGAGATGTTGTGGAAGATACTTAGTACCTACCGATCTGGTAGTATTG  
CAAACTAGTTGTAAGGCCACGAAAGGATGCCAGAAAGGTACCCATAGGTAACAAGCGACACTATGGATCTGATCTGGG  
GCCAGGTACCTCTATCTTGGTGATCTGGTTAAAAAACGTCATAGTGGGCCAAAACCGGGGGGGATCCCCGGTTTCTTTTA  
TTTTATCAAGACTCTTAATTGTCTCCATAGTGGCATTGATAAAAATAAAAGGAAAACCGGGGATCCCCCGGGTTTGGCCC

ACTAGACGTTTTTTAACCAGATCACCAAGATAGAGGTACCTGGCCCCAGATCAGATCCATAGTGTGCGCTTGTTACCTATG  
GGAACCTTCTGGGCATCCTTTCGTGGGCCTTACAACCTAGTGTGTTGCAATACTACCAAAATCGGTAGGAACTAAGAATTTTCC  
ACAACATCTCAGGTTTAGAA

>SRR2298573.785020 785020 length=500

CCTGGTAACAGGTGCCTCTGGGGCCAAAAGCCAAGGTTTAAACAAACCTTTAGGATTGGTTCTAAACCTGAGATGTTGTG  
GAAGATACTTAGTACCTACCGATCTGGTAGTAGTGCAAACTAGTTGTAAGGCCACGAAGGATGCCAGAAGGTACCC  
ATAGGTAACAAGCGACACTATGGATCTGATCTGGGGCCAGGTACCTCTATCTTGGTGATCTGGTTAAAAACGTCTAGTG  
GGCCAAACCGCTCCATAGTGGCATTGATAAAAATAAAAGGAAACCGGGGATCCCCCGGGTTTGGCCACTAGACGTTTT  
TTAACCAGATCACCAAGATAGAGGTACCTGGCCCCAGATCAGATCCATAGTGTGCGCTTGTTACCTATGGGTACCTTCTGG  
GCATCCTTTCGTGGGCCTTACAACCTAGTGTGTTGCACTACTACCAGATCGGAAGGTATTAAGTAATCTCCACAACATCTCAG  
GTTTAAAAACCAATCCAAAAG

>SRR2298573.777508 777508 length=500

GATCCATAGTGTGCGCTTGTACCTATGGGTACCTTCTGGGCATCCTTTCGTGGGCCTTACAACCTAGTGTGTTGCACTACTAC  
CAGATCGGTAGGTACTAAGTATCTTCCACAACATCTCAGGTTTAGAACCAATCCTAAAGGGTTTGTAAACCTTGGCCTT  
TGGCCCCAGAGGCACCTGTTACCAGGTGTTGTTCCGCTGGCAATAGGATGCTTTACAGCAAAATGTTGGTTCCAATAAGT  
TCCACACGCGCTGTAGGTTGAGAGACGTCTGGTGACGTGTGGAACTTATTGGAACAACATTTTGTCTGTAAGCATCC  
TATTGCCAGCGGAACAACACCTGGTAACAGGTGCCCTCTGGGGCCAAAAGCCAAGGTTTAAACAAACCTTTAGGATTGGTT  
CTAAACCTGCGATGTTGTGGAAGATACTTAGTACCTACCAGTCTGGTAGTAGTGCAAACTAGTTGTAAGGCCACGAA  
GGAGGCCAGAAAGGGACCCA

>SRR2298573.773393 773393 length=500

GGTTTAAACAAACCTTTAGGATTGGTTCTAAACCTGAGATGTTGTGGAAGATACTTAGTACCTACCGATCTGGTAGTAGT  
GCAAACTAGTTGTAAGGCCACGAAGGATGCCAGAAGGTACCCATAGGTAACAAGCGACACTATGGATCTGATCTGG  
GGCCAGGTACCTCTATCTTGGTGATCTGGTTAAAAACGCTTAGTGGGCCAAACCCGGGGGGGATCCCCGGTTTCTTTTT  
ATTTTATCAATGTCTCCATAGTGGCATTGATAAAAATAAAAGGAAACCGGGGATCCCCCGGGTTTGGCCACTAGACGT  
TTTTTAAACAGATCACCAAGATAGAGGTACCTGGCCCCAGATCAGATCCATAGTGTGCGCTTGTACCTATGGGTACCTT  
TGGGCATCCTTTCGTGGGCCTTACAACCTAGTGTGTTGCACTACTACCAGATCGGTAGGTACTAAGCATCTTCCACAACATCT  
CAGGTTTAGAACCAATCCTA

>SRR2298573.765785 765785 length=500

CCCCAGATCAGATCCATAGTGTGCGCTTGTACCTATGGGTACCTTCTGGGCATCCTTTCGTGGGCCTTACAACCTAGTGT  
GCACTACTACCAGATCGGTAGGTACTAAGTATCTTCCACAACATCTCAGGTTTAGAACCAATCCTAAAGGGTTTGTAA  
CCTTGGCTTTTGGCCCCAGAGGCACCTGTTACCAGGTGTTGTTCCGCTGGCAATAGGATGCTTTAAAGCAAAATGTTGTT  
TCCAATAAGTTGCTCACACAGCCATCCTCTAGTAAGTTTGTGAGACGTCTGGGGACGTGTGGGAACCTTATTGGAACAAC  
ATTTTGTCTGTAAGCATCTTATTGCCAGCGGAACAACACCTGGAAACAGGTGCCCTCTGGGGCCAAAAGCCAAGGTTTAA  
AAACCTTTAGGATTGGTCTTAAACCTGAGATGTTGTGGAAGATACTTATTACCTACCAGATCTGGTAGAAGGGCAAAC  
CAGTTGTAAGGCCACGAAG

>SRR2298573.763553 763553 length=500

CACTAGTTGTAAGGCCACGAAGGATGCCAGAAGGTACCCATAGGTAACAAGCGACACTATGGATCTGATCTGGGGCCA  
GGTACCTCTATCTTGGTGATCTGGTTAAAAACGCTCTAGTGGGCCAAACCCGGGGGGGATCCCCGGTTTCTTTTTATTTT  
ATCAATGCCACTATGGAGACAATTAAGAGTATTGCAGATATGGCGACCGGAGTGGTCAGTTTCAAGTTGATTTCCACTATCAA  
TGCAGTTAAGGTAACATCTTTGTTCTCTGGTTTTCAGCTGTTGTAGCATAACAATTTGGTCCGAGCACATTAGAAGCATC  
ATCTGCAACTTTGGTTAATAAATACCTCCAATTTCAATACCTACATTTTCCACTCTCTCATTAACCTACATTTGATAGTAG  
AATCAACTGAACTGACCACTCCGGTCGCCATATCTGCAATACTCTTAATTTGTTCCCAAAGTGGCATTTGATAAAAATAAAG  
GAACACGGGGATCCCCCCC

>SRR2298573.746819 746819 length=500

TACCTGGCCCCAGATCAGATCCATAGTGTGCGCTTGTTACCTATGGGTACCTTCTGGGCATCCTTTCGTGGGCCTTACAAC  
AGTGTGTTGCACTACTACCAGATCGGTAGGTACTAAGTATCTTCCACAACATCTCAGGTTTAGAACCAATCCTAAAGGGTT  
TGTTAAACCTTGGCTTTTGGCCCCAGAGGCACCTGTTACCAGGTGTTGTTCCGCTGGCAATAGGATGCTTTACAGCAAAA  
TGTTGTTTCAATTGGAACAACATTTTGTCTGTAAGCATCTTATTGCCAGCGGAACAACACCTGGTAACAGGTGCCCTCTG  
GGGCCAAAAGCCAAGGTTTAAACAAACCTTTAGGATTGGTTCTAAACCTGAGATGTTGTGGAAGATACTTAGTACCTACC  
GATCTGGTAGTAGTGCAAAAACCTAGTTGTAAGGCCAACGAAGGATGCCAGAAGGGACCCAAAGGGAAAAAGCGACCCAT  
TGGGTCTGACCTGGGGCCAG

>SRR2298573.740197 740197 length=500

CTGTAAAGCATCTTATTGCCAGCGGAACAACACCTGGTAACAGGTGCCCTCTGCGGCCAAAAGCCAAGGTTTAAACAAACCC  
TTTAGGATTGGTTCTAAACCTGAGATGTTGTGGAAGATACTTAGTACCTACCAGATCTGGTAGTAGTGCAAACTAGTTG  
TAAGGCCACGAAGGATGCCAGAAGGTACCCATAGGTAACAAGCGACACTATGGATCTGATCTGGGGCCAGGTACCTCT  
ATCTTGGTGGCCATATCTGCAATACTCTTAATTTGTCTCCATAGTGGCATTGATAAAAATAAAAGGAAACCGGGGATCCCC  
CCGGGTTTGGCCACTAGACGTTTTTTAACCAGATCACCAAGATAGAGGTACCTGGCCCCAGATCAGATCCATAGTGTGCG  
CTTGTACCTATGGGTACCTTCTGGGCATCCTTTCGTGGGCCTTACAACCTAGTGTGTTGCACTACAACAGATCGGTAGGGA  
CTAAGAATCTTCCCCAACAC

>SRR2298573.714172 714172 length=500  
TCCTTCGTGGGCTTACAACACTAGTGTGTTGCACTACTACCAGATCGGTAGGTACTAAGTATCTTCCACAACATCTCAGGTT  
TAGAACCAATCCTAAAAGGGTGTGTTAAACCTTGGCTTTTGGCCCCAGAGGCACCTGTTACCAGGTGTTGTTCCGCTGGCA  
ATAGGATGCTTTACAGCAAAATGTTGTTTCCAATAAGTTCCACACGTCACCAGACGTCACAAACTTACTAGAGGAGG  
GCTGGGTGAGTACCATGCTTGTGGACCTTATGCTCACACAGCCATCCTCTAGTAAGTTTGTGAGACGTCCTGGTGACGTGT  
GGAACTTATTGGAAACAACATTTTGTCTGTAAGCATCCTATTGCCAGCGGAACAACACCTGGTAACAGGTGCCTCTGGG  
GCCAAAAGCCAAGGTTTAAACAAACCTTTAGGATTGGTTCTAAACCTGAGATGTTGTGGAAGATACTTAGTACCTACCGA  
TCTGGTAGGAGTGCAAACAC  
>SRR2298573.713838 713838 length=500  
TTAACAAACCTTTAGGATTGGTTCTAAACCTGAGATGTTGTGGAAGATACTTAGTACCTACCAGATCTGGTAGTAGTGCA  
AACACTAGTTGTAAGGCCACGAAGGATGCCAGAAAGGTACCCATAGGTAACAAGCGACACTATGGATCTGATCTGGGGC  
CAGGTACCTCTATCTTGGTGATCTGGTTAAAAAACGTCCTAGTGGGCCAAAACCCGGGGGGGATCCCCGGTTTCTTTTATT  
TTATCAAGGCCGCCATATCTGCAATACTCTTAATTGTCTCCATAGTGGCATTGATAAAAAATAAAAGGAAAACCGGGGATCCC  
CCCCGGTTTGGCCACTAGACGTTTTTTAACCAGATCACCAAGATAGAGGTACCTGGCCCCAGATCAGATCCATAGTGT  
CGCTTGTACCTATGGGTACCTTCTGGGCATCCTTCGTGGGCTTACAACAAGTGTGTTGAACTACTACCAGATCGGTAGG  
TACTAAGTACCTTCCACCAC  
>SRR2298573.705728 705728 length=500  
CCTGGTAACAGGTGCCTCTGGGGCCAAAAGCCAAAGGTTTAAACAAACCTTTAGGATTGGTTCTAAACCTGAGATGTTGTG  
GAAGATACTTAGTACCTACCGATCTGGTAGTAGTGCAAAACACTAGTTGTAAGGCCACGAAGGATGCCAGAAAGGTACCC  
ATAGGTAACAAGCGACACTATGGATCTGATCTGGGGCCAGGTACCTCTATCTTGGTGATCTGGTTAAAAAACGTCCTAGTG  
GGCCAAAACCGCTCTGCAATACTCTTAATTGTCTCCATAGTGGCATTGATAAAAAATAAAAGGAAAACCGGGGATCCCCCGG  
GTTTGGCCACTAGACGTTTTTTAACCAGATCACCAAGATAGAGGTACCTGGCCCCAGATCAGATCCATAGTGTGCTTGT  
TTACCTATGGGTACCTTCTGGGCATCCTTCGTGGGCTTACAACACTAGTGTGTTGCACTAATAACCAAATCGGTAGGTACTAA  
GAACCTTCCCCAACATCTCA  
>SRR2298573.703156 703156 length=500  
ATAGAGGTACCTGGCCCCAGATCAGATCCATAGTGTGCTGCTTGTACCTATGGGTACCTTCTGGGCATCCTTCGTGGGCTT  
TACAACACTAGTGTGTTGCACTACTACCAGATCGGTAGGTACTAAGTATCTTCCACAACATCTCAGGTTTLAGAACCAATCCTA  
AAGGGTGTGTTAAACCTTGGCTTTTGGCCCCAGAGGCACCTGTTACCAGGGTGTGTTCCGCTGGCAATAGGATGCTTTAC  
AGCAAAAATGGAAAACAACATTTTGTCTGTAAGCATCCTATTGCCAGCGGAACAACACCTGGTAACAGGTGCCTCTGGGGCC  
AAAAGCCAAGGTTTAAACAAACCTTTAGGATTGGTTCTAAACCTGAGATGTTGTGGAAGATACTTAGTACCTACCAGATCT  
GGTAGTAGTGCAAAACCTAGTTGTAAGGCCACGAAGGATGCCAGAAAGGTACCCATAGGTAACAAGCGAAAACAATGGAT  
CTGACCTGGGGCCAGGTACC  
>SRR2298573.689935 689935 length=500  
CTAGACGTTTTTTAACCAGATCACCAAGATAGAGGTACCTGGCCCCAGATCAGATCCATAGTGTCCCTTGTACCTATGG  
GTACCTTCTGGGCATCCTTCGTGGGCTTACAACACTAGTGTGTTGCACTACTACCAGATCGGTAGGTACTAAGTATCTTCCA  
CAACATCTCAGGTTTLAGAACCAATCCTAAAAGGGTGTGTTAAACCTTGGCTTTTGGCCCCAGAGGCACCTGTTACCAGGG  
TGGTTCCCCGGCATCCTATTGCCAGCGGAACAACACCTGGTAACAGGTGCCTCTGGGGCCAAAAGCCAAGGTTTAAACAAA  
CCCTTTAGGATTGGTTCTAAACCTGAGATGTTGTGGAAGATACTTAGTACCTACCAGATCTGGTAGTAGTGCAAAACACTAG  
TTGTAAGGCCACGAAGGATGCCAGAAAGGTACCCATAGGTAACAAGGGACACTATGGATCTGATCTGGGGCCAGGGACC  
TCTATCTTGGTGATCTGGTA  
>SRR2298573.672972 672972 length=500  
GAGGTACCTGGCCCCAGATCAGATCCATAGTGTGCTGCTTGTACCTATGGGTACCTTCTGGGCATCCTTCGTGGGCTTAC  
AACTAGTGTGTTGCACTACTACCAGATCGGTAGGTACTAAGTATCTTCCACAACATCTCAGGTTTLAGAACCAATCTAAAG  
GGTTGTGTTAAACCTTGGCTTTTGGCCCCAGAGGCACCTGTTACCAGGTGTTGTTCCGCTGGCAAAAAGGATGCTTTACAGC  
AAAATGTTGTGTTTGTGAGACGTCCTGGTGACGTGTGGGAACCTTATTGGAAACAACATTTTGTCTGTAAGCATCCTATTGC  
CAGCGGAACAACACCTGGTAACAGGTGCCTCTGGGGCCAAAAGCCAAGGTTTAAACAAACCTTTAGGATTGGTTCTAAAC  
CTGAGATGTTGTGGAAGAAAACCTTAGGACCTACCAGATCTGGAAAGAAAGGAAAAACACTAGTTGTAAGGCCACAAAAGATGC  
CCCAGGGAAACCCAAAAGGCA  
>SRR2298573.660547 660547 length=500  
TACTTAGTACCTACCAGATCTGGTAGTAGTGCAAAACACTAGTTGTAAGGCCACGAAGGATGCCAGAAAGGTACCCATAGG  
TAACAAGCGACACTATGGATCTGATCTGGGGCCAGGTACCTCTATCTTGGTGATCTGGTTAAAAAACGTCCTAGTGGGCCA  
AACCCGGGGGGGATCCCCGGTTTCTTTTATTTTATCAATGCCACTATGGAGACAATTAAGAGAATTGCAGATATGGCGA  
CCGGAGTGGGCATTGATAGTGAATCAACTGAACTGACCACTCCGGTCGCCATATCTGCAATACTCTTAATGTCTCCAT  
AGTGGCATTGATAAAAAATAAAAGGAAAACCGGGGATCCCCCGGGTTTGGCCACTAGACGTTTTTTAACCAGATCACCAA  
GATAGAGGTACCTGGCCCCAGATCAGATCCATAGTGTGCTGCTTGTACCTATGGGTACCTTCTGGGCATCCTTCGTGGGCC  
TTACAACACTAGTGTGTTGCACA  
>SRR2298573.656146 656146 length=500  
CTAGTAAGTTTGTGAGACGTCCTGGTGACGTGTGGGAACCTTATTGGAAACAACATTTTGTCTGTAAGCATCCTATTGCCAG  
CGGAACAACACCTGGTAACAGGTGCCTCTGGGGCCAAAAGCCAAAGGTTTAAACAAACCTTTAGGATTGGTTCTAAACCTG



AGATGTTGTGGAAGATACTTAGTACCTACCGATCTGGTAGTAGTGCAAACTAGTGTGTAAGGCCCGAAGGATGCCCA  
GAAGGTACCAGATCCATAGTGTGCGATTGTTACCTATGGGTACCTTCTGGGCATCCTTCGTGGGCCCTTACAACCTAGTGT  
GCACTACTACCAGATCGGTAGGTACTAAGTACCTTCCACAACATCTCAGGTTTAGAACCAATCCTAAAAGGGTTTGTAAA  
CCTTGGCTTTTGGCCCCGAAGGAACCTGTTACCAGGTGTTGTTCCGCTGGCAAAAAGAAATGCTTTACAGCAAAAATGTGGTT  
TCCAAAAAGTTCCCCACGC

>SRR2298573.656095 656095 length=500

GATAAAATAAAAGGAAACCGGGGATCCCCCGGGTTTGGCCCACTAGACGTTTTTTTAAACCAGATCACCAAGATAGAGGT  
ACCTGGCCCCAGATCAGATCCATAGTGTGCGTTGTTACCTATGGGTACCTTCTGGGCATCCTTCGTGGGCCCTTACAACCTA  
GTGTTTGCCTACTACCAGATCGGTAGGTACTAAGTATCTTCCACAACATCTCAGGTTTAGAACCAATCCTAAAAGGGTTT  
GTTAAACCTGGTGTGGGAACTTATTGGAAACAACATTTTGTCTGTAAGCATCCTATTGCCAGCGGAACAACACCTGGTAA  
CAGGTGCCTCTGGGGCCAAAAGCCAAGGTTTAAACAAACCTTTAGGATTGGTTCTAAACCTGAGATGTTGTGGAAGATAC  
TTAGTACCTACCGATCTGGTAGTAGTGCAAACTAGTTTTTAAGGCCACAAAAGGATGCCCAGAAGGAACCCAAAAGGTAA  
CAAGCGACCCCATGGACCGA

>SRR2298573.655490 655490 length=500

TAAACAAACCTTTAGGATTGGTTCTAAACCTGAGATGTTGTGGAAGATACTTAGTACCTACCGATCTGGTAGTAGTGCAA  
ACACTAGTTGTAAGGCCACGAAGGATGCCCAGAAGGTACCCATAGGTAACAAGCGACACTATGGATCTGATCTGGGGCC  
AGGTACCTCTATCTTGGTGATCTGGTTAAAAACGTTCTAGTGGGCCAAAACCCGGGGGGGATCCCCGGTTTCCTTTTATTT  
TATCAAGGCATGACCACTCCGGTCGCCATATCTGCAATACTCTTAATTGTCTCCATAGTGGCATTGATAAAATAAAAGGA  
AACCAGGGATCCCCCGGGTTTGGCCCACTAGACGTTTTTTTAAACCAGATCACCAAGATAGAGGTACCTGGCCCCAGATC  
AGATCCATAGTGTGCGTTGTTACCTATGGGTACCTTCTGGGCATCCTTCGTGGGCCCTTACAACCTAGTGTGTTGCACTACTA  
CCAGATCGGTAGGGACTAAG

>SRR2298573.647975 647975 length=500

GGTGAGACGTTCTGGTGACGTGTGGGAACTTATTGGAAACAACATTTTGTCTGTAAGCATCCTATTGCCAGCGGAACAACA  
CCTGGTAACAGGTGCCTCTGGGGCCAAAAGCCAAGGTTTAAACAAACCTTTAGGATTGGTTCTAAACCTGAGATGTTGTG  
GAAGATACTTAGTACCTACCGATCTGGTAGTAGTGCAAACTAGTGTGTAAGGCCACGAAGGATGCCCAAAAGGTACCC  
ATAGGTAACACCATAAGTGGCATTGATAAAATAAAAGGAAACCGGGGATCCCCCGGGTTTGGCCCACTAGACGTTTTTTT  
AACCAGATCACCAAGATAGAGGTACCTGGCCCCAGATCAGATCCATAGTGTGCGTTGTTACCTATGGGTACCTTCTGGGC  
ATCCTTCGTGGGCCCTTACAACCTAGTGTGTTGCACTACTACCAGACCGGTAGGACCTAAGTATCTTCCCCAAAATCTCAGGT  
TTAGAACCAATCCTAAAAGG

>SRR2298573.644859 644859 length=500

CTTTAGGATTGGTTCTAAACCTGAGATGTTGTGGAAGATACTTAGTACCTACCGATCTGGTAGTAGTGCAAACTAGT  
GTAAGGCCACGAAGGATGCCCAGAAGGTACCCATAGGTAACAAGCGACACTATGGATCTGATCTGGGGCCAGGTACCTC  
TATCTTGGTGATCTGGTTAAAAACGTTCTAGTGGGCCAAAACCCGGGGGGGATCCCCGGTTTCCTTTTATTTTATCAATGC  
CACTATGGAGACTCTTAATTGTCTCCATAGTGGCATTGATAAAATAAAAGGAAACCGGGGATCCCCCGGGTTTGGCCC  
ACTAGACGTTTTTTTAAACCAGATCACCAAGATAGAGGTACCTGGCCCCAGATCAGATCCATAGTGTGCGTTGTTACCTATG  
GGTACCTTCTGGGCATCCTTCGTGGGCCCTTACAACCTAGTGTGTTGCACTACTACCAGATCGGAAGGGCCCAAGAAATCTTCC  
ACAAACTCCCAGGTTTTTGAA

>SRR2298573.626625 626625 length=500

CACCAAGATAGAGGTACCTGGCCCCAGATCAGATCCATAGTGTGCGTTGTTACCTATGGGTACCTTCTGGGCATCCTTCG  
TGGGCCCTTACAACCTAGTGTGTTGCACTACTACCAGATCGGTAGGTACTAAGTATCTTCCACAACATCTCAGGTTTAGAAC  
AATCCTAAAAGGGTTTGTAAACCTTGGCTTTTGGCCCCAGAGGCACCTGTTACCAGGGGTTGTTCCGCTGGCAATAGGAT  
GCTTTACAGAACTTATTGGAAACAACATTTTGTCTGTAAGCATCCTATTGCCAGCGGAACAACACCTGGTAACAGGTGCC  
TCTGGGGCCAAAAGCCAAGGTTTAAACAAACCTTTAGGATTGGTTCTAAACCTGAGATGTTGTGGAAGATACTTAGTACC  
TACCGATCTGGTAGTAGTGCAAACTAGTGTGAAAGGCCACGAAGGATGCCCAGAAGGTACCCAAAAGGGAAAAAGCGAC  
ACTATGGAACCTGATCTGGGG

>SRR2298573.625040 625040 length=500

GGTTTGGCCCACTAGACGTTTTTTTAAACCAGATCACCAAGATAGAGGTACCTGGCCCCAGATCAGATCCATAGTGTGCGTT  
GTTACCTATGGGTACCTTCTGGGCATCCTTCGTGGGCCCTTACAACCTAGTGTGTTGCACTACTACCAGATCGGTAGGTACTA  
AGTATCTTCCACAACATCTCAGGTTTAGAACCAATCCTAAAAGGGTTTGTAAACCTTGGCTTTTGGCCCCAGAGGCACCT  
GTTACCAGGGGACTTTGGTGATGTGTGGGAACTTATTGGAAACAACATTTTGTCTGTAAGCATCCTATTGCCAGCGGAAC  
AACACCTGGTAACAGGTGCCTCTGGGGCCAAAAGCCAAGGTTTAAACAAACCTTTAGGATTGGTTCTAAACCTGAGATGT  
TGTGGAAGATACTTAGTACCTACCGATCTGGTAGTAGTGCAAACTAATTGTAAGGCCACGAAGGATGCCCAAAAGGT  
ACCCAAAAGGTAAAAAGGGCA

>SRR2298573.624115 624115 length=500

TCCATAGTGTGCGTTGTTACCTATGGGTACCTTCTGGGCATCCTTCGTGGGCCCTTACAACCTAGTGTGTTGCACTACTACCA  
GATCGGTAGGTACTAAGTATCTTCCACAACATCTCAGGTTTAGAACCAATCCTAAAAGGGTTTGTAAACCTTGGCTTTTGG  
GCCCCAGAGGCACCTGTTACCAGGTGTTGTTCCGCTGGCAATAGGATGCTTTACAGCAAAAATGTTGTTTCCAATAAGTTC  
CCACACGTCCCCGCTGGAGTTAGTGAGACGTTGTTCCGCTGGCAATAGGATGCTTTACAGCAAAAATGTTGTTTCCAATAAGTTC  
CCTATTGCCAGCGGAACAACACCTGGTAACAGGTGCCTCTGGGGCCAAAAGCCAAGGTTTAAACAAACCTTTAGGATTGG

TTCTAAACCTGAGATGTTGTGGAAGATACTTAGTACCTACCGATCTGGAAGAAGGGAAAAACACTAGTGGAAAAGGCCCCC  
AAGGAGGCCAGAAAGGAACC  
>SRR2298573.621436 621436 length=500  
CCGGGGATCCCCCGGGTTTTGGCCACTAGACGTTTTTTAACCAGATCACCAAGATAGAGGTACCTGGCCCCAGATCAG  
ATCCATAGTGTGCTTGTACCTATGGGTACCTTCTGGGCATCCTTCGTGGGCCTTACAACCTAGTGTGTTGCACTACTACC  
AGATCGGTAGGTACTAAGTATCTTCCACAACATCTCAGGTTTAGAACCAATCTTAAAGGGTTTTGTTAAACCTTGGCTTTT  
GGCCCCAGGGCAACATTTTGTGTAAAGCATCCTATTGCCAGCGGAACAACACCTGGTAACAGGTGCCTCTGGGGCCAAA  
AGCCAAGGTTTAAACAAACCTTTAGGATTGGTTCTAAACCTGAGATGTTGTGGAAGATACTTAGTACCTACCGATCTGGT  
AGTAGTGCAAACTAGTTGTAAGGCCACGAAGGATGCCAGAAAGGTACCCATAGGTAACAAGCGAAACCATGGAACCTG  
ATCTGGGGCCAGGTACCTCA  
>SRR2298573.602086 602086 length=500  
GTGGAACAAGACGCTTAAAGCATGGTGTAAATTTAGCTTTTTCTAACCACATTTTTGTGTGGGGTGGCAGATGGCGTGCCA  
TAGCTCTATTAGTGAGATAACCATGCTTGTGGACCTTATGCTCACGCAGCCATCCTCTAGTAAGTTTGTGAGACGTCTGGT  
GACGTGTGGAACTTATTGGAAACAACATTTTGTGTAAAGCATCCTATTGCCAGCGGAACAACACCTGGTAACAGGGGC  
CTCTGGGGCCCTTGTACCTATGGGTACCTTCTGGGCATCCTTCGTGGGCCTTACAACCTAGTGTGTTGCACTACTACCAGA  
TCGGTAGGTACTAAGTATCTTCCACAACATCTCAGGTTTAGAACCAATCTTAAAGGGTTTTGTTAAACCTTGGCTTTTGT  
CCCAGAGGCACCTGTTACCAGGTGTTGTTCCGCTGGCAATAGGATGCTTTACAGCAAAAATGTTGTTTCCAATAAGTTCCC  
ACACGTCACCAGACGCTCTCC  
>SRR2298573.596737 596737 length=500  
GGTTTGGCCACTAGACGTTTTTTAACCAGATCACCAAGATAGAGGTACCTGGCCCCAGATCAGATCCATAGTGTGCTTT  
GTTACCTATGGGTACCTTCTGGGCATCCTTCGTGGGCCTTACAACCTAGTGTGTTGCACTACTACCAGATCGGTAGGTACTA  
AGTATCTTCCACAACATCTCAGGTTTAGAACCAATCTTAAAGGGTTTTGTTAAACCTTGGCTTTTGGCCCCAGAGGCACCT  
GTTACCAGGGCGGTGACGTGTGGAACTTATTGGAAACAACATTTTGTGTAAAGCATCCTATTGCCAGCGGAACAACAC  
CTGGTAACAGGTGCCTCTGGGGCCAAAAGCCAAGGTTTAAACAAACCTTTAGGATTGGTTCTAAACCTGAGATGTTGTGG  
AAGATACTTAGTACCTACCGATCTGGTAGTAGTGCAAAAACCTAGTTGAAAGGCCACCAAGGAGGCCAGAAGGAACCCA  
TAGGTAAAAAGCGAACCAAG  
>SRR2298573.577384 577384 length=500  
CCTGGTAACAGGTGCCTCTGGGGCCAAAAGCCAAGGTTTAAACAAACCTTTAGGATTGGTTCTAAACCTGAGATGTTGTG  
GAAGATACTTAGTACCTACCGATCTGGTAGTAGTGCAAAACCTAGTTGTAAGGCCACGAAGGATGCCAGAAAGGTACCC  
ATAGGTAACAAGCGACACTATGGATCTGATCTGGGGCCAGGTACCTCTATCTTGGTGATCTGGTTAAAAAACGCTAGTG  
GGCCAAACCGCATTAGAAGCATCATCTGCAACTTTGGTTAATAAATACCTCCAATTTTATTACCTACATTTTCCACTCT  
CTCATTAACCTACATTTGATAGTGGAATCAACTGAACTGACCCTCCGGTCGCCATATCTGCAATACTCTTAATTTGTCTCCA  
TAGTGGCATTGATAAAAATAAAAGGAAACCGGGGATCCCCACCGGTTTGGCCCCCTAGACGTTTTTTAAACCAGATCCCCA  
AGATAGCGGTACCTGGCCCA  
>SRR2298573.574217 574217 length=500  
CGTCTGGTGACGTGTGGAACTTATTGGAAACAACATTTTGTGTAAAGCATCCTATTGCCAGCGGAACAACACCTGGTA  
ACAGGTGCCTCTGGGGCCAAAAGCCAAGGTTTAAACAAACCTTTAGGATTGGTTCTAAACCTGAGATTTTTGTGGAAGATA  
CTTAGTACCTACCGATCTGGTAGTAGTGCAAAACCTAGTTGTAAGGCCACGAAGGATGCCAGAAAGGTACCCATAGGTA  
ACAAGCGACACTGCAATACTCTTAATTTGTCTCCATAGTGGCATTTGATAAAAATAAAAGGAAACCGGGGATCCCCCGGGT  
TTGGCCACTAGACGTTTTTTAACCAGATCACCAAGATAGAGGTACCTGGCCCCAGATCAGATCCATAGTGTGCTTGT  
ACCTATGGGTACCTTCTGGGCATCCTTCGTGGGCCTTACAACCTAGGGTTTGCCTACTACCAGATCGGTAGGGACTAAGT  
ATCTTCCACAAAATCTCAGG  
>SRR2298573.559827 559827 length=500  
GGTTCAACAAACCTTTAGGATTGGTTCTAAACCTGAGATGTTGTGGAAGATACTTAGTACCTACCGATCTGGTAGTAGT  
GCAAACTAGTTGTAAGGCCACGAAGGATGCCAGAAAGGTACCCATAGGTAACAAGCGACACTATGGATCTGATATGG  
GGCCAGGTACCTCTATCTTGGTGATCTGGTTAAAAAACGCTAGTGGGCCAAAACCGGGGGGATCCCCGGTTTTCTTTTA  
TTTTTATCAACTACATTTGATAGTGGAATCAACTGAACTGACCCTCCGGTCGCCATATCTGCAATACTCTTAATTTGTCTC  
CATAGTGGCATTTGATAAAAATAAAAGGAAACCGGGGATCCCCCGGGTTTTGGCCACTAGACGTTTTTTAACCAGATCAC  
CAAGATAGAGGTACCTGGCCCCAGATCAGATCCATAGTGTGCTTGTACCTATGGGTACCTTCTGGGCATCCTTCGTGG  
GCCTTACAACCTAGTGTGTTG  
>SRR2298573.548826 548826 length=500  
GGCTATTAGTGAGATAACCATGCTTGTGGACCTTATGCTCACACAGCCATCCTCTAGTAAGTTTGTGAGACGTCTGGTGAC  
GTGTGGGAACCTTATTGGAAACAACATTTTGTGTAAAGCATCCTATTGCCAGCGGAACAACACCTGGTAACAGGTGCCTC  
TGGGGCCAAAAGCCAAGGTTTAAACAAACCTTTAGGATTGGTTCTAAACCTAAGATGTTGTGGAAGATACTTAGAACCTA  
CCGACCTGGGGGATCCCCCGGGTTTTGGCCACTAGACGTTTTTTAACCAGATCACCAAGATAGAGGTACCTGGCCCCA  
GATCAGATCCATAGTGTGCTTGTACCTATGGGTACCTTCTGGGCATCCTTCGTGGGCCTTACAACCTAGTGTGTTGCACT  
ACTACCAGATCGGTAGGTACTAAGTATCTTCCACAACATCTCAGGTTTAAAAACCAATCTTAAAGGGTTTTGTTAAACCTT  
GTTTTGGCCCCAGAGGCAC  
>SRR2298573.529221 529221 length=500

GTCTGGTGACGTGTGGGAACTTATTGGAAACAACATTTTGTCTGTAAAGCATCCTATTGCCAGCGGAACAACACCTGGTAA  
CAGGTGCCTCTGGGGCCAAAAGCCAAGGTTTAAACAAACCCTTTAGGATTGGTTCTAAACCTGAGATGTTGTGGAAGATAC  
TTAGTACCTACCGATCTGGTAGTAGTGCAAACTAGTTGTAAGGCCACGAAGGATGCCAGAAAGGTACCCATAGGTAA  
CAAGGGACAAAAAGGAAACCGGGGATCCCCCGGGTTTTGGCCACTAGACGGTTTTTAAACCAGATCACCAAGATAGAGG  
TACCTGGCCCCAGATCAGATCCATAGTGTGCTTGTACCTATGGGTACCTTCTGGGCATCCTTCGTGGGCCTTACAAC  
AGGTTTTGCACTACTACCAGATCGGTAGGAACTAAGTATCTTCCACAACATCTCAGGTTTAGAACCAATCTTAAAGGTT  
TGTTAAACCTTGGCTTTTGC

>SRR2298573.528454 528454 length=500

CGTGTGGGAACTTATTGGAAACAACATTTTGTCTGTAAAGCATCCTATTGCCAGCGGAACAACACCTGGTAAACAGGTGCCT  
CTGGGGCCAAAAGCCAAGGTTTAAACAAACCCTTTAGGATTGGTTCTAAACCTGAGATGTTGTGGAAGATACTTAGTACCT  
ACCGATCTGGTAGTAGTGCAAACTAGTTGTAAGGCCACGAAGGATGCCAGAAAGGTACCCATAGGTAAACAAGGGACA  
CTATGGATCGAGATAGAGGTACCTGGCCCCAGATCAGATCCATAGTGTGCTTGTACCTATGGGTACCTTCTGGGCATC  
CTTCGTGGGCCTTACAACCTAGTGTGCACTACTACCAGATCGGTAGGTAAGTATCTTCCACAACATCTCAGGTTTA  
GAACCAATCTTAAAGGTTTTGTTAAACCTTGGCTTTTGGCCCCAGAGGCACCTGGTACCAGGGTGGTTCCGCGGGCAAA  
AGGGTGTCTTACAGCAAAAG

>SRR2298573.507597 507597 length=500

CACCAAGATAGAGGTACCTGGCCCCAGATCAGATCCATAGTGTGCTTGTACCTATGGGTACCTTCTGGGCATCCTTCG  
TGGGCCTTACAACCTAGTGTGCACTACTACCAGATCGGTAGGTAAGTATCTTCCACAACATCTCAGGTTTAGAAC  
AATCCTAAAAGGTTTTGTTAAACCTTGGCTCTTGGCCCCAGAGGCACCTGTTACCAGGTGTTGTTCCGCTGGCAATAGGAT  
GCTTTACAGAGTCTGGTGACGTGTGGGAACTTATTGGAAACAACATTTTGTCTGTAAAGCATCCTATTGCCAGCGGAACA  
CACCTGGTAAACAGGTGCCTCTGGGGCCAAAGCCAAGGTTTAAACAAACCCTTTAGGATTGGTTCTAAACCTGAGATGTTG  
TGGAAGATACTTAGTACCTACCGATCTGGTAGTAGTGCAAACTAGTTGTAAGGCCCCGAAGGATGCCAGAAAGGGAC  
CCAAAGGAAACAAGCGACCC

>SRR2298573.499265 499265 length=500

GCCTCTGGGGCCAAAAGCCAAGGTTTAAACAAACCCTTTAGGATTGGTTCTAAACCTGAGATGTTGTGGAAGATACTTAGT  
ACCTACCGATCTGGTAGTAGTGCAAACTAGTTGTAAGGCCACGAAGGATGCCAGAAAGGTACCCATAGGTAAACAAGC  
GACACTATGGATCTGATCTGGGGCCAGGTACCTCTATCTTGGTGATCTGGTTAAAAAACGTTAGTGGGCCAAAACCCGGG  
GGGGATCCCAGACATAGGCGTCCGCTGGAGTGGGAAACCGGGGATCCCCCGGGTTTTGGCCACTAGACGTTTTTTAAACC  
AGATCACCAAGATAGAGGTACCTGGCCCCAGATCAGATCCATAGGGTGTGTTACCTATGGGTACCTTCTGGGCATCC  
TTCGTGGGCCTTACAACCTAGGTTTTGCACTACTACCAGATCGGGAGGTAAGGATCTTCCACAACAGCCAGGTTTAG  
AACCAACCTAAAAGGTTTTG

>SRR2298573.490942 490942 length=500

CTATTAGTGAGATACCATGCTTGTGGACCTTATGCTCACACAGCCATCCTCTAGTAAGTTTGCAGACGCTCTGGTGACGT  
GTGGGAACTTATTGGAAACAACATTTTGTCTGTAAAGCATCCTATTGCCAGCGGAACAACACCTGGTAAACAGGTGCCTCTG  
GGGCCAAAAGCCAAGGTTTAAACAAACCCTTTAGGATTGGTTCTAAACCTGAGATGTTGTGGAAGAACTAAGTACCTACC  
GACCTGGTAGCTTCTGGGCATCCTTCGTGGGCCTTACAACCTAGTGTGTTGCACTACTACCAGATCGGTAGGTAAGTAT  
CTTCCACAACATCTCAGGTTTTAGAACCAATCTTAAAGGTTTTGTTAAACCTTGGCTTTTGGCCCCAGAGGCACCTGTTAC  
CAGGTGTTGTTCCGCTGGCAATAGGATGCTTTACAGCAAAAATGTTGTTTCCAATAAGTTCCACACGTCACCAGACGCTC  
CGCAAACTTACTAAAAGGATG

>SRR2298573.481619 481619 length=500

GTGAGATACCATGCTTGTGGACCTTATGCTCACACAGCCATCCTCTAGTAAGTTTGTGAGACGCTCTGGTGACGTGTGGGA  
ACTTATTGGAAACAACATTTTGTCTGTAAAGCATCCTATTGCCAGCGGAACAACACCTGGTAAACAGGTGCCTCTGGGGCCA  
AAAGCCAAGGTTTAAACAAACCCTTTAGGATTGGTTCTAAACCTGAGATGTTGTGGAAGATACTTAGTACCTACCGATCTG  
GTAGTAGTGACACCAAGATAGAGGTACCTGGCCCCAGATCAGATCCATAGTGTGCTTGTACCTATGGGTACCTTCTGG  
GCATCCTTCGTGGGCCTTACAACCTAGTGTGTTGCACTACTACCAGATCGGTAGGTAAGTATCTTCCACAACATCTCAG  
GTTTAGAACCAATCTTAAAGGTTTTGTTAAACCTTGGCTTTTGGCCCCAGAGGCACCTGTTACCAGGGTGGTTCCGCGG  
GCAATAGGATGGTTTACAGA

>SRR2298573.476893 476893 length=500

GTTTAAACAAACCCTTTAGGATTGGTTCTAAACCTGAGATGTTGTGGAAGATACTTAGTACCTACCGATCTGGTAGTAGTG  
CAAACCTAGTTGTAAGGCCACGAAGGATGCCAGAAAGGTACCCATAGGTAAACAAGCGACACTATGGATCTGATCTGGG  
GCCAGGTACCTCTATCTTGGTGATCTGGTTAAAAAACGTTAGTGGGCCAAAACCCGGGGGGATCCCCGGTTTCTTTTA  
TTTTATCAAGAGCATCATCTGCAACTTTGGTTAATAAATACCTCCAGTTTCAATTACCTACATTTTCCACTCTCTCATTA  
ACTACATTTGATAGTGAATCAACTGAACCTGACCACTCCGGTCCGCATATCTGCAATACTCTAATTTGCTCCATAATGGC  
ATTGATAAAAATAAAAGGAAACCGGGGATCCCCCGGGTTTTGGCCACTAAACGTTTTTTTAAACCAGATAACCAAGAAAGA  
GGTACCTGGCCCCATCCAA

>SRR2298573.472425 472425 length=500

CAGATCACCAAGATAGAGGTACCTGGCCCCAGATCAGATCCATAGTGTGCTTGTACCTATGGGTACCTTCTGGGCATC  
CTTCGTGGGCCTTACAACCTAGTGTGCACTACTACCAGATCGGTAGGTAAGTATCTTCCACAACATCTCAGGTTTA  
GAACCAATCTTAAAGGTTTTGTTAAACCTTGGCTTTTGGCCCCAGAGGCACCTGTTACCAGGTGTTGTTCCGCTGGCAAT

AGGAGGCTTAGCTGTAAAGCATCCTATTGCCAGCGGAACAACACCTGGTAAACAGGTGCCTCTGGGGCCAAAAGCCAAGGT  
TTAACAAACCCCTTTAGGATTGGTTCTAAACCTGAGATGTTGTGGAAGATACTTAGTACCTACCGATCTGGTAGTAGTGCA  
AACTAGTTGTAAGGCCACGAAGGATGCCAGAAAGGTACCCATAGGGAACAAGCGACACTATGGAAGTACCTGGGGC  
CAGGAACCCCTATCTTGGGG

>SRR2298573.464310 464310 length=500

GCCAAGGTTTAAACAAACCCCTTTAGGATTGGTTCTAAACCTGAGATGTTGTGGAAGATACTTAGTACCTACCGATCTGGTA  
GTAGTGCAAAACACTAGTTGTAAGGCCACGAAGGATGCCAGAAAGGTACCCATAGGTAACAAGCGACACTATGGATCTGA  
TCTGGGGCCAGGTACCTCTATCTTGGTGATCTGGTTAAAAAACGTCCTAGTGGGCCAAAACCCGGGGGGGATCCCCGGTTTC  
CTTTTATTTAACTCTTAATTTGCTCCATAAGTGGCATTGATAAAAATAAAAAGGAAACCGGGGATCCCCCCCCGGGTTTGGCCC  
ACTAGACGTTTTTTTAAACAGATCACCAAGATAGAGGTACCTGGCCCCAGATCAGATCCATAGTGTGCTTGTACCTATG  
GGTACCTTCTGGGCATCCTTCGTGGGCCTTCCACCTAGTGTTCGACTACTACCAGACCGGTAGGACCTAAGGACCTTCC  
AAAACACCTCAGGTTTTTAAAC

>SRR2298573.405568 405568 length=500

GGTACCTTCTGGGCATCCTTCGTGGGCCTTACAACCTAGTGTTCGACTACTACCAGATCGGTAGGTAAGTATCTTCC  
ACAACATCTCAGGTTTGAACCAATCCTAAAGGGTTTGTAAACCTTGGCTTTTGGCCCCAGAGGCACCTGTTACCAGGG  
GTTGTTCCGCTGGCAATAGGATGCTTTACAGCAAAATGTTGTTTCCAATAAGTTCACACAGTACCAGACGTTCCACAA  
ACTTACTAGGGAATCAACTGAACTGACCCTCCGGTCCCATATCTGCAATACTCTTAATTTGCTCCATAGTGGCATTGA  
TAAAAATAAAAGGAAACCGGGGATCCCCCCCCGGGTTTGGCCCCACTAGACGTTTTTTTAAACAGATCACCAAGATAGAGGTAC  
CATGCTTGTGGACCTTATGCTCACACAGCCATCCTCTAGTAAGTTTGTGAGACGTCCTGGTGAAGGGTGGGAACCTTATTTGG  
AAACAACATTTTGGCTGTAAA

>SRR2298573.399832 399832 length=500

CACCAAGATAGAGGTACCTGGCCCCAGATCAGATCCATAGTGTGCTTGTACCTATGGGTACCTTCTGGGCATCCTTCCG  
TGGGCCTTACAACCTAGTGTTCGACTACTACCAGATCGGTAGGTAAGTATCTTCCACAACATCTCAGGTTTGAAC  
AATCCTAAAGGGTTTGTAAACCTTGGCTTTTGGCCCCAGAGGCACCTGTTACCAGGGGTGTTCCGCTGGCAATAGGAT  
GCTTTACAGAAACTTATTTGAAACAACATTTTGTGTTAAAGCATCCTATTGCCAGCGGAACAACACCTGGTAAACAGTGC  
CTCTGGGGCCAAAAGCCAAGGTTTAAACAAACCCCTTAGGATTGGTTCTAAACCTGAGATGTTGTGGAAGATACTTAGTAC  
CTACCAGATCTGGTAGTAGTGCAAAACACTAGTTGTAAGGCCACGAAGGATGCCAGAAAGGAACCCAAAAGGAAACAAGCGG  
ACCTATGGATCTGACCTGGG

>SRR2298573.389986 389986 length=500

GGGATCCCCCGGGTTTGGCCCCACTAGACGTTTTTTTAAACAGATCACCAAGATAGAGGTACCTGGCCCCAGATCAGATC  
CATAGTGTGCTTGTACCTATGGGTACCTTCTGGGCATCCTTCGTGGGCCTTACAACCTAGTGTTCGACTACTACCAGA  
TCGGTAGGTAAGTATCTTCCACAACATCTCAGGTTTGAACCAATCCTAAAGGGTTTGTAAACCTTGGCTTTTGGC  
CCCAGAGGCCCTTATTTGAAACAACATTTTGTGTTAAAGCATCCTATTGCCAGCGGAACAACACCTGGTAAACAGTGCCT  
CTGGGGCCAAAAGCCAAGGTTTAAACAAACCCCTTAGGATTGGTTCTAAACCTGAGATGTTGTGGAAGATACTTAGTACCT  
ACCGATCTGGTAGTAGTGCAAAACACTAGTTGTAAGGCCACCAAGGATGCCAGAAAGGTACCCACAGGAAAAAAGCGACA  
CAATGGACCTGAACTGGGGC

>SRR2298573.352907 352907 length=500

GGTTTGGCCCCACTAGACGTTTTTTTAAACAGATCACCAAGATAGAGGTACCTGGCCCCAGATCAGATCCATAGTGTGCTT  
GTTACCTATGGGTACCTTCTGGGCATCCTTCGTGGGCCTTACAACCTAGTGTTCGACTACTACCAGATCGGTAGGTAAGT  
AGTATCTTCCACAACATCTCAGGTTTGAACCAATCCTAAAGGGTTTGTAAACCTTGGCTTTTGGCCCCAGAGGCACCT  
GTTACCAGGGGCGGAACAACACCTGGTAAACAGGTGCCTCTGGGGCCAAAAGCCAAGGTTTAAACAAACCCCTTAGGATTGG  
TTCTAAACCTGAGATGTTGTGGAAGATACTTAGTACCTACCGATCTGGTAGTAGTGCAAAACACTAGTTGTAAGGCCACG  
AAGGATGCCAGAAAGGTACCCATAGGTAACAAGCGACACTATGGATCTGATCTGGGGCCAGGAACCTCTATCTTGGGGAA  
CTGGTTAAAAAACGTTCTAGG

>SRR2298573.324536 324536 length=500

TACAACCTAGTGTTCGACTACTACCAGATCGGTAGGTAAGTATCTTCCACAACATCTCAGGTTTGAACCAATCCTA  
AAGGGTTTGTAAACCTTGGCTTTTGGCCCCAGAGGCACCTGTTACCAGGTGTTGTTCCGCTGGCAATAGGATGCTTTAC  
AGCAAAATGTTGTTTCCAATAAGTTCCACACGTCACCAGACGTCACAACTTACTAGAGGATGGCTGTGTGAGCATA  
AGGTCCCAGGCCATGCTTGTGGACCTTATGCTCACACAGCCATCCTCTAGTAAGTTTGTGAGACGTCCTGGTGACGTGTG  
GGAACCTTATTTGAAACAACATTTTGTGTTAAAGCATCCTATTGCCAGCGGAACAACACCTGGTAAACAGGTGCCTCTGGGG  
CCAAAAGCCAAGGTTTAAACAAACCCCTTAGGATTGGTTCTAAACCTGAGAGGTTGGGGAAAGAACTAAGTACCAACCGAT  
CTGGAAGTAGGGCAAACAG

>SRR2298573.324191 324191 length=500

CCCCCGGGTTTGGCCCCACTAGACGTTTTTTTAAACAGATCACCAAGATAGAGGTACCTGGCCCCAGATCAGATCCATAGT  
GTCGCTTGTACCTATGGGTACCTTCTGGGCATCCTTCGTGGGCCTTACAACCTAGTGTTCGACTACTACCAGATCGGTA  
GGTACTAAGTATCTTCCACAACATCTCAGGTTTGAACCAATCCTAAAGGGTTTGTAAACCTTGGCTTTTGGCCCCAGA  
GGCACCTGTAGCTGTAAAGCATCCTATTGCCAGCGGAACAACACCTGGTAAACAGGTGCCTCTGGGGCCAAAAGCCAAGGT  
TTAACAAACCCCTTAGGATTGGTTCTAAACCTGAGATGTTGTGGAAGATACTTAGTACCTACCGATCTGGTAGTAGTGCA  
AACTAGTTGTAAGGCCACGAAGGATGCCAGAAAGGTACCCATAGGGAACAAGAGACACTATGGATCTGATCGGGGGC

CAGGTACCTCTATCTTGGGG  
>SRR2298573.321675 321675 length=500  
AGATAGAGGTACCTGGCCCCAGATCAGATCCATAGTGTGCTTGTACCTATGGGTACCTTCTGGGCATCCTTCGTGGGC  
CTTACAACACTAGTGTGTTGCACTACTACCAGATCGGTAGGTACTAAGTATCTTCCACAACATCTCAGGTTTLAGAACCAATCC  
TAAAGGGTGTGTTAAACCTTGGCTTTTGGCCCCAGAGGCACCTGTTACCAGGGTGTGTTCCGCTGGCAATAGGATGCTTT  
ACAGCAAAAGGAACTTATTGGAACAACATTTTGTCTGTAAAGCATCTATTGCCAGCGGAACAACACCTGGTAACAGGTG  
CCTCTGGGGCCAAAAGCCAAGGTTTAAACAACCCCTTAGGATTGGTTCTAAACCTGAGATGTTGTGGAAGATACTTAGTA  
CCTACCGTTCTGGTAGTAGGGCAAACACTAGTTGTAAGGCCACGAAGGATGCCAGAAGGGACCCATAGGAAACAAGCC  
ACACTCGGGACCGGATCTGG  
>SRR2298573.314594 314594 length=500  
GGTTTGGCCCACTAGACGTTTTTTTAAACCAGATCACCAAGATAGAGGTACCTGGCCCCAGATCAGATCCATAGTGTGCTT  
GTTACCTATGGGTACCTTCTGGGCATCCTTCGTGGGCCTTACAACACTAGTGTGTTGCACTACTACCAGATCGGTAGGTACTA  
AGTATCTTCCACAACATCTCAGGTTTLAGAACCAATCTTAAAGGGTGTGTTAAACCTTGGCTTTTGGCCCCAGAGGCACCT  
GTTACCAGGGCCTATTGCCAGCGGAACAACACCTGGTAACAGGTGCCTCTGGGGCCAAAAGCCAAGGTTTAAACAACCCCT  
TTAGGATTGGTTCTAAACCTGAGATGTTGTGGAAGATACTTAGTACCTACCGATCTGGTAGTAGTGCAAACACTAGTTGT  
AAGGCCACGAAGGATGCCAGAAGGTACCCCTAGGTTAAAAGCGACACCAGGATCTGATCTGGGGCCAGGTACCTCAA  
TCTTGGTGATCGGGTTAAAA  
>SRR2298573.308975 308975 length=500  
AGATAGAGGTACCTGGCCCCAGATCAGATCCATAGTGTGCTTGTACCTATGGGTACCTTCTGGGCATCCTTCGTGGGC  
CTTACAACACTAGTGTGTTGCACTACTACCAGATCGGTAGGTACTAAGTATCTTCCACAACATCTCAGGTTTLAGAACCAATCC  
TAAAGGGTGTGTTAAACCTTGGCTTTTGGCCCCAGAGGCACCTGTTACCAGGTGTGTTCCCTGGCAATAGGATGCTTT  
ACAGCAAAAGGGCGTCCGCTGCGTGTGGGAACCTTATTGGAACAACATTTTGTCTGTAAAGCATCTATTGCCAGCGGAAC  
AACACCTGGTAACAGGTGCCTCTGGGGCCAAAAGCCAAGGTTTAAACAACCCCTTAGGATTGGTTCTAAACCTGAGATGT  
TGTGGAAGATACTTAGTACCTACCGATCTGGTAGTAGTGCAAAAACACTAGTTGTAAGGCCACGAAGGATGCCAGAAGGA  
ACCCATAGGGAACAAGGGAC  
>SRR2298573.293269 293269 length=500  
GAACAACACCTGGTAACAGGTGCCTCTGGGGCCAAAAGCCAAGGTTTAAACAACCCCTTAGGATTGGTTCTAAACCTGAG  
ATGTTGTGGAAGATACTTAGTACCTACCGATCTGGTAGTAGTGCAAAACACTAGTTGTAAGGCCACGAAGGATGCCAGA  
AGGTACCCATAGGTAACAAGCGACACTATGGATCTGATCTGGGGCCAGGTACCTCTAACTTGGGGATCTGGTTAAAAAAC  
GTCTAGTGGGAAAAGGAAAACCGGGGATCCCCCGGGTGTGGCCCACTAGACGTTTTTTTAAACCAGATCACCAAGATAGAGG  
TACCTGGCCCCAGATCAGATCCATAGTGTGCTTGTACCTATGGGTACCTTCTGGGCATCCTTCGTGGGCCTTACAAC  
AGTGTGTTGCACTACTACCAGATCGGTAGGTACTAAGTATCTTCCACAACATCTCAGGTTTLAGAACCAATCTTAAAGGGT  
TGTTAAACCTTGGCTTTTGC  
>SRR2298573.283605 283605 length=500  
GATCCATAGTGTGCTTGTACCTATGGGTACCTTCTGGGCATCCTTCGTGGGCCTTACAACACTAGTGTGTTGCACTACTAC  
CAGATCGGTAGGTACTAAGTATCTTCCACAACATCTCAGGTTTLAGAACCAATCCTAAAGGGTGTGTTAAACCTTGGCTTT  
TGGCCCCAGAGGCACCTGTTACCAGGTGTGTTCCGCTGGCAATAGGATGCTTTACAGCAAAAATGTTGTTTCCAATAAGT  
TCCCACACGCGTGAATTTAGCTTTTCTAACCACATTTTGTGTGGGGTGGCAGATGGCGTGCCATAGCTCTATTAGTGA  
GATACCATGCTTGTGGACCTTATGCTCACACAGCCATCCTCTAGTAAGTTTGTGAGACGTTCTGGTGACGTTGTTGGGAACTT  
ATTGGAACAACATTTTGTCTGTAAAGCATCTATTGCCAGCGGAACAACACCTGGTAACAGGGGCCCTGGGGCCAAAAG  
CCAAGGTTTAAACAACCCCT  
>SRR2298573.278347 278347 length=500  
GTTTAAACAACCCCTTAGGATTGGTTCTAAACCTGAGATGTTGTGGAAGATACTTAGTACCTACCGATCTGGTAGTAGTG  
CAAACACTAGTTGTAAGGCCACGAAGGATGCCAGAAGGTACCCATAGGTAACAAGCGACACTATGGATCTGATCTGGG  
GCCAGGTACCTCTATCTTGGTGATCTGGTTAAAAAACGTTCTAGTGGGCCAAAACCCGGGGGGGATCCCCGGTTTTCTTTTA  
TTTTATCAAGGTGGCATTGATAAAAAATAAAGGAAAACCGGGGATCCCCCGGGTGTGGCCCACTAGACGTTTTTTTAAACCA  
GATCACCAAGATAGAGGTACCTGGCCCCAGATCAGATCCATAGTGTGCTTGTACCTATGGGTACCTTCTGGGCATCCT  
TCGTGGGCCTTACAACACTAGTGTGTTGCACTACTACCAGATCGGTAGGGACAAAAGAACTTCCACAAAACCTCCGGTTTGA  
ACCAACCCAAAAGGGTTTGA  
>SRR2298573.241857 241857 length=500  
ACATTTAGCTGTAAAGCATCTATTGCCAGCGGAACAACACCTGGTAACAGGTGCCTCTGGGGCCAAAAGCCAAGGTTTA  
ACAAACCCCTTAGGATTGGTTCTAAACCTGAGATGTTGTGGAAGATACTTAGTACCTACCGATCTGGTAGTAGTGCAAC  
ACTAGTTGTAAGGCCACGAAGGATGCCAGAAGGTACCCATAGGTAACAAGCGACACTATGGATCTGACCTGGGGCCAG  
GAACCCCTACGGCATTGATAAAAAATAAAGGAAAACCGGGGATCCCCCGGGTGTGGCCCACTAGACGTTTTTTTAAACCA  
TCACCAAGATAGAGGTACCTGGCCCCAGATCAGATCCATAGTGTGCTTGTACCTATGGGTACCTTCTGGGCATCCTTC  
GTGGGCCTTACAACACTAGTGTGTTGCACTACTACCAGATCGGTAGGTACTAAGTATCTTCCACAACATCCCAGGTTTLAGAAC  
CAATCCTAAAGGGTGTGTTA  
>SRR2298573.235613 235613 length=500  
CATCTAAGATTATTACATTAACCCCATGCCTGGTCTCCACTAGTTGAAGGCAACTTGCAATAAAATGAGTGGAACAAGA

CGCTTAAAGCATGGTGTAAATTTAGCTTTTCTAACCACATTTTGTGTGGGGTGGCAGATGGCGTGCCATAGCTCTATTAG  
TGAGATACCATGCTTGTGGACCTTATGCTCACACAGCCATCCTCTAGTAAGTTTGTGAGACGTCTGGTGACGGGTGGGAA  
CTTATTTGGAAAACCTATGGGTACCTTCTGGGCATCCTTCGTGGGCCCTTACAACACTAGTGTTCGACTACTACCAGATCGGTA  
GGTACTAAGTATCTTCCACAACATCTCAGGTTTAGAACCAATCCTAAAAGGGTTTGTAAACCTTTGGCTTTTGGCCCCAGA  
GGCACCTGTTACCAGGTGTTGTTCCGCTGGCAATAGGATGCTTTACAGCAAAAATGTTGTTTCCAATAAGTTCCACACGT  
CACCAGACGTCTCCAAACA

>SRR2298573.171313 171313 length=500

TACCAGATCGGTAGTACTAAGTATCTTCCACAACATCTCAGGTTTAGAACCAATCCTAAAAGGGTTTGTAAACCTTTGGC  
TTTTGGCCCCAGAGGCACCTGTTACCAGGTGTTGTTCCGCTGGCAATAGGATGCTTTACAGCAAAAATGTTGTTTCCAATA  
AGTTCCACACGTCACCAGACGTCTCACAAACTTACTAGAGGATGGCTGTGTGAGCATAAGGTCCACAAGCATGGTATCT  
CACTAATAGGGCCATAGCTCTATTAGTGAGATACCATGCTTGTGGACCTTATGCTCACACAGCCATCCTCTAGTAAGTTT  
GTGAGACGTCTGGTGACGTGTGGAACTTATTTGGAAAACAACATTTTGTCTGTAAAGCATCCTATTTGCCAGCGGAACAACAC  
CTGGTAACAGGTGCCTCTGGGGCCAAAAGCCAAGGTTTAAACAAACCTTTAGGATTTGGTTCTAAACCTGAGATGTTGTG  
AAGATAATTAGTACCTACCG

>SRR2298573.171312 171312 length=500

TAGGCGTCCGCTGTGTCTCCATAGTGGCATTGATAAAAATAAAAAGGAAACCGGGGATCCCCCGGGTTTGGCCCCACTAGA  
CGTTTTTTAACCAGATCACCAAGATAGAGGTACCTGGCCCCAGATCAGATCCATAGTGTGCTTGTACCTATGGGTACC  
TTCTGGGCATCCTTCGTGGGCCTTACAACACTAGTGTTCGACTACTACCAGATCGGTAGGAACAAAAGAAATCTTCCAAAAA  
TCTCAGGTTAAGGTGCCTCTGGGGCCAAAAGCCAAGGTTTAAACAAACCTTTAGGATTTGGTTCTAAACCTGAGATGTTGT  
GGAAAGATACTTAGTACCTACCGATCTGGTAGTAGTGCAAAACACTAGTTGTAAGGCCACGAAGGATGCCAGAAAGGTACC  
CATAGGTAACAAGCGACACTATGGATCTGATCTGGGGCCAGGTACCTCTATCTTGGTGATCTGGTTAAAAAACGTTAGT  
GGGCCAAAACCGGGGGGGAC

>SRR2298573.134040 134040 length=500

ACCCTTTAGGATTTGGTTCTAAACCTGAGATGTTGTGGAAGATACTTAGTACCTACCGATCTGGTAGTAGTGCAAAACACTA  
GTTGTAAGGCCACGAAGGATGCCAGAAGGTACCCATAGGTAACAAGCGACACTATGGATCTGATCTGGGGCCAGGTAC  
CTCTATCTTGGTGATCTGGTTAAAAAACGTTAGTGGGCCAAAACCGGGGGGATCCCCGGTTTCCTTTTATTTTATCAA  
TGCCACTATGGACCCTCCGGTCGCCATATCTGCAATACTCTTAATTGTCTCCATAGTGGCATTGATAAAAATAAAAAGGAA  
ACCGGGGATCCCCCGGGTTTGGCCCCACTAGACGTTTTTTTTAACAGATCACCAAGATAGAGGTACCTGGCCCCAGATCA  
GATCCATAGTGTGCTTGTACCTATGGGTACCTTCTGGGCATCCTTCGTGGGCCCTTACAACCAGGGTTTCCCTCTCTAC  
CAGCTCGGTGGGGCCTAGTA

>SRR2298573.123955 123955 length=500

GTAAGCATCCTATTGCCAGCGGAACAACACCTGGTAACAGGTGCCTCTGGGGCCAAAAGCCAAGGTTTAAACAAACCTTT  
TAGGATTTGGTTCTAAACCTGAGATGTTGTGGAAGATACTTAGTACCTACCGATCTGGTAGTAGTGCAAAACACTAGTTGTA  
AGGCCACGAAGGATGCCAGAAGGTACCCATAGGTAACAAGCGACACTATGGATCTGATCTGGGGCCAGGTACCTCTAT  
CTTGGGGATGACGTTTTTTAACCAGATCACCAAGATAGAGGTACCTGGCCCCAGATCAGATCCATAGTGTGCTTGTTA  
CCTATGGGTACCTTCTGGGCATCCTTCGTGGGCCTTACAACACTAGTGTTCGACTACTACCAGATCGGTAGGTACTAAGTA  
TCTTCCACAACATCTCAGGTTTAGAACCAATCCTAAAAGGGTTTGTAAACCTTTGGCTTTTGGCCCCAGAGGCACCTGTTA  
CCAGGTGTTGTTCCGCTGGA

>SRR2298573.120785 120785 length=500

CCAAGATAGAGGTACCTGGCCCCAGATCAGATCCATAGCGTTCGCTTGTACCTATGGGTACCTTCTGGGCATCCTTCGTG  
GGCCTTACAACACTAGTGTTCGACTACTACCAGATCGGTAGGTACTAAGTATCTTCCACAACATCTCAGGTTTAGAACCAA  
TCCTAAAGGGTTTGTAAACCTTTGGCTTTTGGCCCCAGAGGCACCTGTTACCAGGTGTTGTTCCGCTGGCAATAGGAGGC  
TTTACAGCAAAAACAACATTTTGTCTGTAAAGCATCCTATTGCCAGCGGAACAACACCTGGTAACAGGTGCCTCTGGGGCC  
AAAAGCCAAGGTTTAAACAAACCTTTAGGATTTGGTTCTAAACCTGAGATGTTGTTGGAAGATACTTAGTACCTACCGATCT  
GGTAGTAGTGCAAAACACTAGTTGTAAGGCCACGAAGGATGCCAGAAGGTACCCCTAGGTAACAAGCGACCTATGGAA  
CTGACCTGGGGCCAGGTACC

>SRR2298573.114124 114124 length=500

GATCAGATCCATAGTGTGCTTGTACCTATGGGTACCTTCTGGGCATCCTTCGTGGGCCTTACAACACTAGTGTTCGACT  
ACTACCAGATCGGTAGGTACTAAGTATCTTCCACAACATCTCAGGTTTAGAACCAATCCTAAAAGGGTTTGTAAACCTTTG  
GCTTTTGGCCCCAGAGGCACCTGTTACCAGGTGTTGTTCCGCTGGCAATAGGATGCTTTACAGCAAAAATGTTGTTTCCAA  
TAAGTTCCCCCTTATGCTCACACAGCCATCCTCTAGTAAGTTTGTGAGACGTCTGGTGACGTGTGGAACTTATTGGAA  
ACAACATTTTGTCTGTAAAGCATCCTATTGCCAGCGGAACAACACCTGGTAACAGGTGCCTCTGGGGCCAAAAGCCAAGGT  
TTAAACAAACCTTTAGGATTTGGTTCTAAACCTGAGATGTTGTTGGAAGATACTTAGTACCTACCGATCTGGTAGAAGTGCA  
AACACTAGTTTTAAGGCCCC

>SRR2298573.108903 108903 length=500

CCTGGTAACAGGTGCCTCTGGGGCCAAAAGCCAAGGTTTAAACAAACCTTTAGGATTTGGTTCTAAACCTGAGATGTTGTG  
GAAGATACTTAGTACCTACCGATCTGGTAGTAGTGCAAAACACTAGTTGTAAGGCCACGAAGGATGCCAGAAAGGTACCC  
ATAGGTAACAAGCGACACTATGGATCTGATCTGGGGCCAGGTACCTCTATCTTGGTGATCTGGTTAAAAAACGTTAGTG  
GGCCAAAACCGCCTGTACTACATCTTTGTTCTCTGGTTACGCTGTTGTAGCATAGCAATTTGGTCCGAGCACATTAAGAAGC

ATCATCTGCAACTTTGGTTAATAAAATTACCTCCAATTTTCATTACCTACATTTTCCACTCTCTCATTAACTACATTGATAG  
TGGAAATCAACTGAACTGACCACTCCGGTCGCCATATCTGCAATACTCTTAATTGTCTCCATAGGGGCATTGATAAAAAATA  
AGGGAAAACCGGGGATCCCC

>SRR2298573.103183 103183 length=500

GGTTTGGCCCACTAGACGTTTTTTAACCAGATCACCAAGATAGAGGTACCTGGCCCCAGATCAGATCCATAGTGTGCGCTT  
GTTACCTATGGGTACCTTCTGGGCATCCTTCGTGGGCCTTACAACCTAGTGTGTTGCACTACTACCAGATCGGTAGGTACTA  
AGTATCTTCCACAACATCTCAGGTTTAGAACCAATCCTAAAGGGTTTGTAAACCTTTGGCTTTTGGCCCCAGAGGCACCT  
GTTACCAGGGGAACAACACCTGGTAACAGGTGCCCTCTGGGGCCAAAAGCCAAGGTTTAAACAAACCTTTAGGATTGGTTC  
TAAACCTGAGATGTTGTGGAAGATACTTAGTACCTACCGATCTGGTAGTAGTGCAAACACTAGTTGTAAGGCCACGAA  
GATGCCCAGAAAGGACCCATAGGTAACAAGCGACACTATGGATCTGATCTGGGGCCAGGTACCTCTATCTTGGGGATCGG  
GTTAAAAAACGTTAGTGGG

>SRR2298573.92648 92648 length=500

CACACAGCCATCCTCTAGTAAGTTTTGTGAGACGTTCTGGTGACGTTGTGGGAACCTTATTGGAAACAACATTTTGCTGTAAAG  
CATCTTATTGCCAGCGGAACAACACCTGGTAACAGGTGCCCTCTGGGGCCAAAAGCCAAGGTTTAAACAAACCTTTAGGAT  
TGGTCTAAACCTGAGATGTTGTGGAAGATACTTAGTACCTACCGATCTGGTAGTAGTGCAAACACTAGTTGTAAGGCC  
ACGAAGAATCAAAGGAAAACCGGGGATCCCCCGGGTTTGGCCCACTAGACGTTTTTTTAAACCAGATCACCAAGATAGAG  
GTACCTGGCCCCAGATCAGATCCATAGTGTGCTTGTACCTATGGGTACCTTCTGGGCATCCTTCGTGGGCCTTACAAC  
TAGTGTTTGCACTACTACCAGATCGGTAGGTACTAAGTATCTTCCAAAACAACCTCAGGTTTAGAACCAATCCTAAAGGGT  
TGGTTAAACCTTTGGCTTTTTG

>SRR2298573.90439 90439 length=500

GATGGCGTGCCATAGCTCTATTAGTGAGATAACCATGCTTGTGGACCTTATGCTCACACAGCCATCCTCTAGTAAGTTTTGT  
GAGACGTTCTGGTGACGTTGTGGGAACCTTATTGGAAACAACATTTTGCTGTAAAGCATCCTATTGCCAGCGGAACAACACCT  
GGTAACAGGTGCCCTCTGGGGCCAAAAGCCAAGGTTTAAACAAACCTTTAGGATTGGTTCATAACCTGAGATGTTGTGGAA  
GATACTTAGACTACCAGATCGGTAGGTACTAAGTATCTTCCACAACATCTCAGGTTTAGAACCAATCCTAAAGGGTTTGT  
TAAACCTTTGGCTTTTGGCCCCAGAGGCACCTGTTACCAGGTGTTGTTCCGCTGGCAATAGGATGCTTTACAGCAAAATGT  
TGTTTCCAATAAGTTCCACACGTCACCAGACGTTCCAAAACCTTACTAGAGGAGGGGCTGTGGGAGCATAAGGGCCACAA  
CCACGGAAACCTCCCTATTAG

>SRR2298573.84307 84307 length=500

ACATTTTGTCTGTAAGCATCCTATTGCCAGCGGAACAACACCTGGTAACAGGTGCCCTCTGGGGCCAAAAGCCAAGGTTTTA  
ACAAACCTTTAGGATTGGTTCATAACCTGAGATGTTGTGGAAGATACTTAGTACCTACCGATCTGGTAGTAGTGCAAAC  
ACTAGTTGTAAGGCCACGAAGGATGCCCAGAAAGGTACCCATAGGTAACAAGCGACACTATGGATCTGATCTGGGGCCAG  
GAACCCCTATCTACATTTGATAGTGAATCAACTGAACTGACCACTCCGGTCGCCATATCTGCAATACTCTTAATTGTCTC  
CATAGTGGCATTGATAAAAATAAAGGAAAACCGGGGATCCCCCGGGTTTGGCCCACTAGACGTTTTTTTAAACCAGATCAC  
CAAGATAGAGGTACCTGGCCCCAGATCAGATCCATAGTGTGCTTGTACCTATGGGTACCTTCTGGGCATCCTTCGTG  
GCCTTACAACCTAGTGTTTGC

>SRR2298573.72327 72327 length=500

GGTACCTTCTGGGCATCCTTCGTGGGCCTTACAACCTAGTGTGTTGCACTACTACCAGATCGGTAGGTACTAAGTATCTTCC  
ACAACATCTCAGGTTTAGAACCAATCCTAAAGGGTTTTGTAAACCTTTGGCTTTTGGCCCCAGAGGCACCTGTTACCAGGT  
GTTGTTCCGCTGGCAATAGGATGCTTTACAGCAAAATGTTGTTTCCAATAAGTTTCCAAAACGTCACCAGACGCCTCCCAA  
ACTTACTAGGACCTTATGCTCACACAGCCATCCTCTAGTAAGTTTTGTGAGACGTTCTGGTGACGTTGTGGGAACCTTATTGGA  
AACAACATTTTGTCTGTAAGCATCCTATTGCCAGCGGAACAACACCTGGTAACAGGTGCCCTCTGGGGCCAAAAGCCAAGG  
TTTAAACAAACCTTTAGGATTGGTTCATAACCTGAGATGTTTTTGGAAAGATACTTAGTACCTACCAGCTGTTAGTAGTGC  
AAACACTAGTTGTAAGGCC

>SRR2298573.51208 51208 length=500

CCCCCGGGTTTTGGCCCACTAGACGTTTTTTAACCAGATCACCAAGATAGAGGTACCTGGCCCCAGATCAGATCCATAGTG  
TCGCTTGTACCTATGGGTACCTTCTGGGCATCCTTCGTGGGCCTTACAACCTAGTGTGTTGCACTACTACCAGATCGGTAG  
GTACTAAGTATCTTCCACAACATCTCAGGTTTAGAACCAATCCTAAAGGGTTTTGTAAACCTTTGGCTTTTGGCCCCAGAG  
GCACCTGTTCCGTTAACAGGTGCCCTCTGGGGCCAAAAGCCAAGGTTTAAACAAACCTTTAGGATTGGTTCATAACCTGAGA  
TGTTGTGGAAGATACTTAGTACCTACCAGATCTGGTAGTAGTGCAAACACTAGTTGTAAGGCCACGAAGGATGCCAGAA  
GGTACCCATAGGTAACAAGCGACACTATGGAACCTGATCTGGGGCCAGGGACCTCTATCTTGGGGATCTGGTTAAAAAACG  
TCTAGTGGGGCCAAACCCGGG

>SRR2298573.18393 18393 length=500

GTTTAAACAAACCTTTAGGATTGGTTCATAACCTGAGATGTTGTGGAAGATACTTAGTACCTACCAGATCTGGTAGTAGTG  
CAAACACTAGTTGTAAGGCCACGAAGGATGCCCAGAAGGTACCCATAGGTAACAAGCGACACTATGGATCTGATCTGGG  
GCCAGGTACCTCTATCTTGGTGATCTGGTTAAAAAACGTTAGTGGGGCCAAACCCGGGGGGGATCCCCGGTTTTCTTTTA  
TTTTATCAAGGCAATTTGGTCCGAGCACATTAGAAAGCATCATCTGCAACTTTGGTTAATAAAATTACCTCCAATTTTATTA  
CCTACATTTTCCACTCTCTCATTAACCTACATTTGATATTGGAATCAACTGAACTGACCACTCCGGCCGCCATATCTGCAAT  
ACTCTTAATTGTCTCCATAGTGGACTTGATAAAAATAAAGAAAACCGGGGAACCCCCCGGGTTGGGGCCCCAAGAGGTT  
TTTAAACCCAGATCCCCACAA

>SRR2298573.10306 10306 length=500  
CTTGTGGACCTTATGCTCACACAGCCATCCTCTAGTAAGTTTGTGAGACGTCTGGTGACGTGTGGGAACTTATTGGAAAC  
AACATTTTGTCTGTAAAGCATCCTATTTGCCAGCGGAACAACACCTGGTAACAGGTGCCTCTGGGGCCAAAAGCCAAGGTTT  
AACAAACCCCTTTAGGATTTGGTTCTAAACCTGAGATGTTGTGGAAGATACTTAGTACCTACCGATCTGGTAGAAGTGCAAA  
CACTAGTTGAGAACTGGCCACTCCGGTCGCCATATCTGCAATACTCTTAATTTGTCTCCATAGTGGCATTGATAAAATAAA  
AGGAAACCGGGATCCCCCGGGTTTGGCCACTAGACGTTTTTTAACCAGATCACCAAGATAGAGGTACCTGGCCCCA  
GATCAGATCCATAGTGTGCTTGTACCTATGGGTACCTTCTGGGCATCCTTCGTGGGCCTTACAACCTAGGGGTTGCACT  
ACTACCAGAACGTAAGGGAC

>SRR2298573.9480 9480 length=500  
AGATAGAGGTACCTGGCCCCAGATCAGATCCATAGTGTGCTTGTACCTATGGGTACCTTCTGGGCATCCTTCGTGGGC  
CTTACAACCTAGTGTTTGCACTACTACCAGATCGGTAGGTACTAAGTATCTTCCACAACATCTCAGGTTTLAGAACCAATCC  
TAAAGGGTTTGTAAACCTTTGGCTTTTGGCCCCAGAGGCACCTGTTACCAGGGTTGTTCCGCTGGCAATAGGATGCTTT  
ACAGCAAAAAGCCGCTGTATTGGTGAGATACCATGCTTGTGGACCTTATGCTCACACAGCCATCCTCTAGTAAGTTTGTGA  
GACGTCTGGTGACGTGTGGGAACTTATTGGAAAACAACATTTTGTCTGTAAAGCATCCTATTTGCCAGCGGAACAACACCTGG  
TAACAGGTGCCTCTGGGGCCAAAAGCCAAGGTTTAAACAACCCCTTTAGGATTTGGTTCTAAACCTGAGATGTTGTGGAAGA  
ACATTAGAACCTACCGATCG

>SRR2298546.990572 990572 length=502  
CGTCTTGACCGAATACCCTAGGATTTTGGAAAGTCCAATTGCAATAAGCTACCCAATATGGTAACATCAACTTGTGTAGCA  
GAACCTGAAGGTATGGATAAAGGTGTCCAAAACATAGACTTTTAGTTGGCCCTAAGTCTGACGAATCTGTTTTAACATAGTT  
TGTGTGTCAGCAACATAGGGGATACATAAAATCAGCCTGTGTGGTCTCAGCCAAATTCATCAACACATGTGGTAAATTTGGTAA  
ACGCTCCAAATGGTGGTGTATGAACCCAAACCTGTTGTGGCATATGACTCAAAGTTAGAAATTTGGAGCGTTTACCAATTT  
ACCACATGTGTTGATGAATTTGGCTGAGACCACACAGGCTGATTTATGTATCCCTATGTTGCTGACACAACTATGTTA  
AAACAGATTCGTCAGACTTAGGGCAACTAAAAGTCTATGTTTGGACACCTTTATCCATACCTTCAGGTTCTGCTACACAA  
GTTGATGTTACCATATTGGGTA

>SRR2298546.982667 982667 length=502  
GGAAGTCCAATTGCAATAAGCTACCCAATATGGTAACATCAACTTGTGTAGCAGAACCTGAAGGTATGGATAAAGGTGTC  
CAAACATAGACTTTTAGTTGCCCCAAGTCTGACGAATCTGTTTTAACATAGTTTGTGTGTCAGCAACATAGGGGATACATAA  
ATCAGCCTGTGTGGTCTCAGCCAAATTCATCAACACATGTGGTAAATTTGGTAAACGCTCCAAATTTCTAACTTTGAGTCAT  
ATGTGTCACAACAGCAGTACGGTGTGGTTTTTCATTTTTCAAGTACAAGTGAATGTTAATCAAGGAACAGCCGGTAGTGCATTG  
GTGGTGTATGAACCCAAACCTGTTGTGACATATGACTCAAAGTTAGAAATTTGGAGCGTTTACCAATTTACCACATGTGTT  
GATGAATTTGGCTGAGACCACACAGGCTGATTTATGTATCCCTATGTTGCTGACACAACTATGTTAAAACAGATTCGT  
CAGACTTAGGGCAACTAAAAGA

>SRR2298546.939237 939237 length=501  
GCTGTAAAGCATCCTATTTGCCAGCGGAACAACACCTGGTAACAGGTGCCTCTGGGGCCAAAAGCCAAGGTTTAAACAAC  
CTTTAGGATTTGGTTATAAACCCTGAGGTGTTGTGGAAGATACTTAGTACCTACCGATCTGGTAGTAGTGCAAACACTAGTT  
GTAAGGCCACGAAGGATGCCAGAAAGGTACCCATAGGTAACAAGTGACACTATGGATCTGATTTGGGGCCAGGTACCTC  
TATCTTGGTGACTCTTAATTTGTCTCCATAATGGCATTGATAAAATAAAAAGGAAACCGGGGATCCCCCGGGTTTGGCCC  
ACTAGACGTTTTTTAACCAGATCACCAAGATAGAGGTACCTGGCCCCAAATCAGATCCATAGTGTCACTTGTACCTATG  
GGTACCTTCTGGGCATCCTTCGTGGGCCTTACAACCTAGTGTTTGCACTACTACCAGATCGGTAGGTACTAAGTATCTTCC  
ACAACACCTCAGGTTTATAAC

>SRR2298546.894812 894812 length=501  
AAATACCAACGTCTTGACCGAATACCCTAGGATTTTGGAAAGTCCAATTGCAATAAGCTACCCAATATGGTAACATCAACT  
TGTGTAGCAGAACCTGAAGGTATGGATAAAGGTGTCCAAAACATAGACTTTTAGTTGCCCTAAGTCTGACGAATCTGTTTT  
AACATAGTTTGTGTGTCAGCAACATAGGGGATACATAAAATCAGCCTGTGTGGTCTCAGCCAAATTCATCAACACATGTGGTA  
AATTTGGTAAATAATCAAGGAACAGCCGGTAGTGCATTGGTGGTGTATGAACCCAAACCTGTTGTGACATATGACTCAAAG  
TTAGAAATTTGGAGCGTTTACCAATTTACCACATGTGTTGATGAATTTGGCTGAGACCACACAGGCTGATTTATGTATCCC  
CTATGTTGCTGACACAACTATGTTAAAACAGATTCGTCAGACTTAGGGCAACTAAAAGTCTATGTTTGGACACCTTTAT  
CCATACCTTCAGGTTCTGCTA

>SRR2298546.668493 668493 length=500  
GCAATAAGCTACCCAATATGGTAACATCAACTTGTGTAGCAGAACCTGAAGGTATGGATAAAGGTGTCCAAAACATAGACT  
TTTAGTTGCCCTAAGTCTGACGAATCTGTTTTAACATAGTTTGTGTGTCAGCAACATAGGGGATACATAAAATCAGCCTGTGT  
GGTCTCAGCCAAATTCATCAACACATGTGGTAAATTTGGTAAACGCTCCAAATTTCTAACTTTGAGTCATATGTCACAACAG  
GTTTGGGTTTCAATTAATCAAGGAACAGCCGGTAGTGCATTGGTGGTGTATGAACCCAAACCTGTTGTGACATATGACTCAA  
AGTTAGAAATTTGGAGCGTTTACCAATTTACCACATGTGTTGATGAATTTGGCTGAGACCACACAGGCTGATTTATGTATC  
CCCTATGTTGCTGACACAACTATGTTAAAACAGATTCGTCAGACTTAGGGCAACTAAAAGTCTATGTTTGGACACCTTTT  
ATCCATACCTTCAGGTTCTG

>SRR2298546.616042 616042 length=500  
GTCAATTTTTCCCTAGTCCACTTGTATTTAGTGTCTATTGTAAGAATTTTCTTAAGATTTTGTCTCCGCGTTGGTGCAT  
TGTCAATAAATACCAACGTCTTGACCGAATACCCTAGGATTTTGGAAAGTCCAATTGCAATAAGCTACCCAATATGGTAACA



TCAACTTGTGTAGCAGAACCTGAAGGTATGGATAAAAGGTGTCCAAACATAGACTTTTGTAGTTGCCCTAAGTCTGACGAATC  
TGTTTTAACATATGTTAATCAAGGAACAGCCGGTAGTGCATTGGTGGTGTATGAACCCAAAACCTGTTGTGACATATGACT  
CAAAGTTAGAATTTGGAGCGTTTACCAATTTACCACATGTGTTGATGAATTTGGCTGAGACCACACAGGCTGATTTATGT  
ATCCCCTATGTTGCTGACACAAAATATGTTAAAAACAGATTCGTCAGACTTAGGGCAACTAAAAAGTCTATGTTTGGACACC  
TTTATCCATACCTTCAGGTT

>SRR2298546.544232 544232 length=501

GGGTGTATGAACCCAAAACCTGTTGTGACATATGACTCAAAGTTAGAATTTGGAGCGTTTACCAATTTACCACATGTGTTG  
ATGAATTTGGCTGAGACCACACAGGCTGATTTATGTATCCCCTATGTTGCTGACACAAAATATGTTAAAAACAGATTCGTC  
AGACTTAGGGCAACTAAAAAGTCTATGTTTGGACACCTTTATCCATACCTTCAGGTTCTGCTACACAAGTTGATGTTACCA  
TATTGGGTAGGTCATAAAATACCAACGCTCTTGACCGAATACCCTAGGATTTTGGAAAGTCCAATTGCAATAAGCTACCCCAAT  
ATGGTAACATCAACTTGTGTAGCAGAACCTGAAGGTATGGATAAAAGGTGTCCAAACATAGACTTTTGTAGTTGCCCTAAGTC  
TGACGAATCTGTTTTAACATAGTTTGTGTGTCAGCAACATAGGGGATACATAAAATCAGCCTGTGTGGTCTCAGCCAAATTC  
TCAACACATGTGGTAAATTTGG

>SRR2298546.528130 528130 length=502

CAGCCGGTAGTGCATTGGTGGTGTATGAACCCAAAACCTGTTGTGACATATGACTCAAGGTTAGAATTTGGAGCGTTTACC  
AATTTACCACATGTGTTGATGAATTTGGCTGAGACCACACAGGCTGATTTATGTATCCCCTATGTTGCTGACACAAAATTA  
TGTTAAAAACAGATTCGTCAGACTTAGGGCAACTAAAAAGTCTATGTTTGGACACCTTTATCCATACCTTCAGGTTCTGCTA  
CACAAGTTGATACCCCAATATGGTAACATCAACTTGTGTAGCAGAACCTGAAGGTATGGATAAAAGGTGTCCAAACATAGAC  
TTTTAGTTGCCCTAAGTCTGACGAATCTGTTTTAACATAGTTTGTGTGTCAGCAACATAGGGGATACATAAAATCAGCCTGTG  
TGGTCTCAGCCAAATTCATCAACACATGTGGTAAATTTGGTAAACGCTCCAAATTTCTAACCTTGAGTCATATGTCACAACA  
GGTTTGGGTTTCATACACCACCA

>SRR2298546.330896 330896 length=499

GGGCTAGAGGACATCAGATAACCCATGTGGAACCTACCAAAAGTCTTTTGGGACAAAAACAGCAAGCCAGCCTATGGCCAA  
TCAAGATACTTTGCAGCAGTACGGTGTGGTTTCCATTTTCAAGTACAAGTGAATGTTAATCAAGGAACAGCCGGTAGTGC  
ATTGGTGGTGTATGAACCCAAAACCTGTTGTGACATATGACTCAAAGTTAGAATTTGGAGCGTTTACCAATTTACCACATG  
TGTTGATGAATATCAACTTGTGTAGCAGAACCTGAAGGTATGGATAAAAGGTGTCCAAACATAGACTTTTGTAGTTGCCCTAA  
GTCTGACGAATCTGTTTTAACATAGTTTGTGTGTCAGCAACATAGGGGATACATAAAATCAGCCTGTGTGGTCTCAGCCAAAT  
TCATCAACACATGTGGTAAATTTGGTAAACGCTCCAAATTTCTAACCTTTGAGTCATATGTCACAACAGGTTTGGGTTTCATAC  
ACCACCAATGCACTACCGG

>SRR2298546.127960 127960 length=501

GATTTTGGAAAGTCCAATTTGCAATAAGCTACCCAATATGGTAACATCAACTTGTGTAGCAGAACCTGAAGGTATGGATAAA  
GGTGTCCAAACATAGACTTTTGTAGTTGCCCTAAGTCTGACGAATCTGTTTTAACATAGTTTGTGTGTCAGCAACATAGGGGAT  
ACATAAAATCAGCCTGTGTGGTCTCAGCCAAATTCATCAACACATGTGGTAAATTTGGTAAACGCTCCAAATTTCTAACTTTG  
AGTCATATGTGTGACATATGACTCAAAGTTAGAATTTGGAGCGTTTACCAATTTACCACATGTGTTGATGAATTTGGCTG  
AGACCACACAGGCTGATTTATGTATCCCCTATGTTGCTGACACAAAATATGTTAAAAACAGATTCGTCAGACTTAGGGCAA  
CTAAAAGTCTATGTTTGGACACCTTTATCCATACCTTCAGGTTCTGCTACACAAGTTGATGTTACCATAATTGGGTAGCTT  
ATTGCAATTTGGACTTCCAAAA

>SRR2298382.46821 46821 length=500

CTCATTAAGTGCATTTGATAGTGGAAATCAACTGAACTGACCACTCCGGTCGCCATATCTGCAATACTCTTAATTTGTCTCCA  
TAGTGGCATTAAATAAAAATAAAAGGAAAACCGGGGATCCCCCGGGTTTGGCCACTAGACGTTTTTTTAAACCAGATCACCA  
AGATAGAGGTACCTGGCCCCAGATCAGATCCATAGTGTGCTTGTACCTATGGGTACCTTCTGGGCATCCTTCGTGGGG  
CTTACAAGTGTGTAAGGCCACGAAAGGATGCCAGAAAGGTACCCATAGGTAACAAGCGACACTATGGATCTGATCTGG  
GGCCAGGTACCTCTATCTTGGTGTCTGGTTAAAAAACGCTCTAGTGGGCCAAACCCGGGGGGGATCCCCGGTTTCCTTTT  
ATTTTATTAATGCCACTATGGAGACAATTAAGAGTATTGCAGATATGGCCAGCCGAGTGGTCAGTTTCACTTCCACT  
ATCAATGCAGTTAATGAGCG

>SRR2298382.6477 6477 length=499

GCATTTGATAGTGGAAATCAACTGAACTGACCACTCCGGTCGCCATATCTGCAATACTCTTAATTTGTCTCCATAGTGGCATT  
GATAAAAATAAAAGGAAAACCGGGGATCCCCCGGGTTTGGCCACTAGACGTTTTTTTAAACCAGATCACCAAGATAGAGGT  
ACCTGGCCCCAGATCAGATCCATAGTGTGCTTGTACCTATGGGTACCTTCTGGGCATCCTTCGTGGGGCTTACAACCTA  
GTGTTTGCAGTGGTAGTAGTGCAAAACTAGTTGTAAGGCCACGAAAGGATGCCAGAAAGGTACCCATAGGTAACAAGCG  
ACACTATGGATCTGATCTGGGGCCAGGTACCTCTATCTTGGTGTCTGGTTAAAAAACGCTCTAGTGGGCCAAACCCGGGG  
GGGATCCCCGGTTTCCTTTTATTTTATCAATGCCACTATGGAGACAATTAAGAGTATTGCAGATATGGCCAGCCGAGTGG  
TCAGGTCACTTGAATCCAC

>SRR2298578.928299 928299 length=500

ACATATGACTCAAAGTTAGAATTTGGAGCATTTACCAATCTACCACATGTGTTGATGAATTTGGCTGAGACCACACAGGC  
TGATTTATGTATCCCCTATGTTGCTGACACAAAATATGTTAAAAACAGATTCGTCAGACTTAGGGCAACTAAAAAGTCTATG  
TTTGGACACCTTTATCCATACCTTCAGGTTCTGCTACACAAGTTGATGTAACCAAAATTTGGGTAGCTTATTTGCAATTTGGAC  
TTCCAAAACCCCTAGGGTTTTTGGAAAGTCCAATTTGCAATAAGCTACCCAATATGGTTACATCAACTTGTGTAGCAGAAC  
TGAAGGTATGGATAAAAGGTGTCCAAACATAGACTTTTGTAGTTGCCCTAAGACTGACGAATCTGTTTTAACATAGTTTGTGT

CAGCAACATAGGGGATACATAAAATCAGCCTGTGGGGGTTTCAGCCAAATTCATCAACAAATGGGGAAAGATTGGGAAAAGGCT  
CCAAATTCAAAATTTATGCA  
>SRR2298578.882919 882919 length=500  
GTTTTGGAAGTCCAATTTGCAATAAGCTACCCAATATGGTTACATCAACTTGTGTAGCAGAACCCTGAAGGTATGGATAAAG  
GTGTCCAAACATAGACTTTTGTGTTGCCCTAAGTCTGACGAATCTGTTTTAACATAGTTTTGTGTGACGAACATAGGGGATA  
CATAAATCAGCCTGTGTGGTCTCAGCCAAATTCATCAACACATGTGGTAGATTGGTAAATGCTCCAAATTTAACTTTGA  
GTCATATGTAGGTGGTGTATGAACCCAAACCCGTTGTGACATATGACTCAAAGTTAGAATTTGGAGCATTACCAATCTA  
CCACATGTTGATGAATTTGGCTGAGACCACACAGGCTGATTTATGTATCCCCATGTTGCTGACACAAACTATGTTAA  
AACAGATTCGTCAGACTTAGGGAAACTAAAAGTCTATGTTTTGGAAAACCTTTATCCATACCTTCAGGTTCTGTCACACAG  
TTGTGGTAACCAATTTGGGA  
>SRR2298578.569893 569893 length=500  
TACAACACTAGTGTTCGACTACTACCAGATCGGTAGGTACTAAGTATCTTCTACAACATCTCAGGTTTAGAACCAATCCTA  
AAGGGTTTGTAAACCTTGGCTTTTGGCCCCAGAGGCACCTGTTACCAGGTGTTGTTCCGCTGGCAATAGGATGCTTTAC  
AGCAAAATGTTGTTTCCAATAAGTTCCACACGTCACCAGACGTCACAAACTTACTAGAGGATGGCTGTGGGAGCATA  
AGGTCCACAAGATACCATGCTTGTGGACCTTATGCTCACACAGCCATCCTCTAGTAAGTTTGTGAGACGTCGTTGACGT  
GTGGAACTTATTGGAAACAACATTTTGTGTAAGCATCCTATTGCCAGCGGAACAACACCTGGTAACAGGGGCCCTCTG  
GGGCCAAAAGCCAAGGTTTAAACAAACCTTTAGGATTGGTCTTAAACCTGAGAGGTTGTAGAAGATACTTAGAACCTACC  
GGTCTGGTAGTAGTGCAAAA  
>SRR2298578.371545 371545 length=500  
ACCAAAAAGTCTTTTGGGACAAAAACAGCAAGCCAGCCTATGGCCAATCAAGATACTTTGCAGCAGTACGGTGTGGTTTTT  
ACTTTCAAGTGCAAGTGAATGTTAATCAAGGAACAGCTGGTAGTGCATTTGGTGGTGTATGAACCCAAACCCGTTGTGACA  
TATGACTCAAAGTTAGAATTTGGAGCATTACCAATCTACCACATGTGTTGATGAATTTGGCTGAGACCACACAGGCTGA  
TTTATGTATCCCCAAGTCTGACGAATCTGTTTTAACATAGTTTTGTGTGACGAACATAGGGGATACATAAAATCAGCCTGT  
GTGGTCTCAGCCAAATTCATCAACACATGTGGTAGATTGGTAAATGCTCCAAATTTAACTTTGAGTCATATGTCACAAC  
GGTTTTGGGTTTATACACCACCAATGAACCTACCAGCCGTTCCCTGATTAACAATTCACCTTGCACTTGAAAGGAAAAACACA  
ACCGTCTCGCGCAAGGAAC  
>SRR2298578.133156 133156 length=500  
AATCAAGGAACAGCTGGTAGTGCATTTGGTGGTGTATGAACCCAAACCCGTTGTGACATATGACTCAAAGTTAGAATTTGG  
AGCATTTACCAATCTACCACATGTGTTGATGAATTTGGCTGAGACCACACAGGCTGATTTATGTATCCCCATGTTGCTG  
ACACAAACTATGTTAAAAACAGATTCGTCAGACTTAGGGCAACTAAAAGTCTATGTTTGGACACCTTTATCCATACCTTCA  
GGTCTGCTAGGTTACATCAACTTGTGTAGCAGAACCCTGAAGGGATGGATAAAGGTGTCCAAACATAGACTTTTAGTTGC  
CCTAAGTCTGACGAATCTGTTTTAACATAGTTTTGTGTGACACCATAGGGGATACATAAAATCAGCCTGTGTGGTCTCAGC  
CAAATTCATCAACACATGTGGTAGATTGGTAAATGCTCCAAATTTAACTTTAAGTCATATGTCACAACGGGTTTGGGTT  
CTAACACCACCAATGCACTC  
>SRR2298578.124388 124388 length=500  
GGTTTAAACAAACCTTTTAGGATTGGTCTTAAACCTGAGATGTTGTAGAAGATACTTAGTACCTACCGATCTGGTAGTAGT  
GCAAAACTAGTTGTAAGGCCACGAAGGATGCCAGAAAGGTACCCATAGGTAACAAGCGACACTATGGATCTGATCTGG  
GGCCAGGTACCTCTATCTTGGTGATCTGGTTAAAAACGTCAGTGGGCCAAACCCGGGGGGGATCCCCGGTTTCTTTTT  
ATTTTATCAATCTCATTAACCTGCATTTGATAGTGGAAATCAACTGAACTGACCACTCCGGTACCATATTTGCAATACTCTT  
AACTGTCTCCATAGTGACATTTGATAAAAATAAAGGAAACCGGGGATCCCCCGGGTTTGGCCACTAGACGTTTTTTTAA  
CCAGATCACCAAGATAGAGGTACCTGGCCCCAGATCAGATCCATAGTGTAGCTTGTACCAATGGGTACCTTCTGGGCAT  
CCTTCGTGGGCTTACCACC  
>SRR2298573.884147 884147 length=500  
ATAGTGTGCTTGTACCTATGGGTACCTTCTGGGCATCCTTCGTGGGCCTTGCAACTAGTGTGTTGCACTACTACCAGAT  
CGGTAGGTACTAAGTATCTTCCACAACATCTCAGGTTTAGAACCAATCCTAAAGGGTTTGTAAACCTTGGCTTTTGGCC  
CCAGAGGCACCTGTTACCAGGTGTTGTTCCGCTGGCAATAGGATGCTTTACAGCAAAATGTTGTTTCCAATAAGTTCCCA  
CACGTCACCAGCTCTATTAGTGAGATACCATGCTTGTGGACCTTATGCTCACACAGCCATCCTCTAGTAAGTTTGTGAGA  
CGTCTGGTGACGTGTGGAACTTATTGGAAAACAACATTTTGTGTAAGCATCCTATTGCCAGCGGAAAAACACCTGGTA  
ACAGGTGCCCTTGGGGCCAAAAGCCAAGGTTTAAACAAACCTTTAGGATTGGTCTTAAACCTGAGATGTTGTGGAAGAAA  
CTTAGAACCTACCGATCTGG  
>SRR2298573.883715 883715 length=500  
CCCCGGGTTTGGCCACTAGACGTTTTTTTAAACAGATCACCAAGATAGAGGTACCTGGCCCCAGATCAGATCCATAGTG  
TCGCTTGTACCTATGGGTACCTTCTGGGCATCCTTCGTGGGCCTTACAACACTAGTGTGTTGCACTACTACCAGATCGGTAG  
GTACTAAGTATCTTCCCCAACATCTCAGGTTTAGAACCAATCCTAAAGGGTTTGTAAACCTTGGCTTTTGGCCCCAGAG  
GCACCTGTTACTGTAAAAGCATCCTATTGCCAGCGGAACAACACCTGGTAACAGGTGCCCTCTGGGGCCAAAAGCCAAGGTT  
TAAACAAACCTTTAGGATTGGTCTTAAACCTGAGATGTTGTGGAAGATACTTAGTACCTACCGATCTGGTAGTAGTGCAA  
ACACTAGTTGTAAGGCCACGAAGGATGCCAGAAAGGTACCCATAGGTAACAAACGACACTAAGGATCTGATCTGGGGCC  
AGGAACCCCTATCTTGGGGC  
>SRR2298573.877703 877703 length=500

CCGCTGGAGTTTGTGAGACGTCTGGTGACGTGTGGGAACTTATTGGAAAACAACATTTTGGCTGTAAAGCATCCTATTGCCA  
GCGGAACAACACCTGGTAACAGGTGCCCTCTGGGGCCAAAAGCCAAGGTTTAAACAAACCCCTTTAGGATTGGTTCTAAAACCT  
GAGATGTTGTGGAAGATACTTAGTACCTACCGATCTGGTAGTAGTGCAAACTAGTGTAAAGGCCACGAAGGATGCCC  
AGAAGGTACCCCATAGTGGCATTTGATAAAAATAAAAGGAAACCGGGGATCCCCCGGGTTTTGGCCACTAGACGTTTTTTT  
AACCAGATCACCAAGATAGAGGTACCTGGCCCCAGATCAGATCCATAGTGTGCTTGTACCTATGGGTACCTTCTGGGC  
ATCCTTCGTGGGCCTTACAAC TAGTGTTCGACTACTACCAGATCGGTAGGTACTAAGTATCTTCCACAACATCTCAGGT  
TTAGAACCAATCCTAAAGGG

>SRR2298573.875376 875376 length=500

CCTTATGCTCACACAGCCATCCTCTAGTAAGTTTGTGAGACGTCTGGTGACGTGTGGGAACTTATTGGAAAACAACATTTT  
GCTGTAAAGCATCCTATTGCCAGCGGAACAACACCTGGTAACAGGTGCCCTCTGGGGCCAAAAGCCAAGGTTTAAACAAACC  
CTTTAGGATTGGTTCTAAAACCTGAGATGTTGTGGAAGAAACTTAGTACCTACCGATCTGGAAATAAGTGCAAAAACTACCG  
TCAAGGCCCAGATCCATAGTGTGCTTGTACCTATGGGTACCTTCTGGGCATCCTTCGTGGGCCCTTACAGCTAGTGT  
GCACTACTACCAGATCGGTAGGTACTAAGTATCTTCCACAACATCTCAGGTTTTAGAACCAATCCTAAAGGGTTTTGTTAAA  
CCTTGGCTTTTTGGCCCCAGAGGCACCTGTTACCAGGTGTTGTTCCGCTGGCAATAGGATGCTTTACAGCAAAAATGTTGTT  
TCCAATAAGTTCCACACGC

>SRR2298573.826119 826119 length=500

GAACAACACCTGGTAACAGGTGCTTCTGGGGCCAAAAGCCAAGGTTTAAACAAACCCCTTTAGGATTGGTTCTAAAACCTGAG  
ATGTTGTGGAAGATACTTAGTACCTACCGATCTGGTAGTAGTGCAAACTAGTGTAAAGGCCACGAAGGATGCCCAGA  
AGGTACCCATAGGTAACAAGCGACACTATGGATCTGATCTGGGGCCAGGTACCTCTATCTTGGTGATCTGGTTAAAAAAC  
GTCTAGTGGGCATTAGAAGCATCATCTGCAACTTTGGTTAATAAAATACCTCCAATTTTATTACCTACATTTTTCCACTCT  
CTCATTAAC TACATTTGATAGTGGAACTAACTGAACTGACCACTCCGGTCGCCATATCTGCAATACTCTTAATTTGTCTCCA  
TAGTGGCATTGATAAAAATAAAAGGAAACCGGGGATCCCCCGGGTTTTGGCCACTAGACGTTTTTTTAAACCAGATCACCA  
AGAAAAGAGGTACCGGCCCCC

>SRR2298573.825002 825002 length=500

GGTTTGGCCACTAGACGTTTTTAAACCAGATCACCAAGATAGAGGTACCTGGCCCCAGATCAGATCCATAGTGTGCTTGT  
TTACCTATGGGTACCTTCTGGGCATCCTTCGTGGGCCCTTACAAC TAGTGTTCGACTACTACCAGATCGGTAGGTACTAA  
GTATCTTCCACAACATCTCAGGTTTTAGAACCAATCCTAAAGGGTTTTGTTAAACCTTGGCTTTTTGGCCCCAGAGGCACCTG  
TTACCAGGGGGTAACTGCAATACTCTTAATTTGTCTCCATAGTGGCATTGATAAAAATAAAATGAGTGGAAAACAAGACGCTT  
AAAGCATGGTGTAATTTAGCTTTTTCTAACCACATTTTTGTGTGGGGTGGCAGATGGCGTGCCATAGCTCTATTAGTGAGA  
TACCATGCTTTGTGGACCTTATGCTCACACAGCCATCCTCTAGTAAGTTTTGTTAAACGCTCTGGTGACGGGGGGGAAACTAT  
TGGAACAAACATTTTCTCTTA

>SRR2298573.801247 801247 length=500

ATCTGGTAGTAGTGCAAACTAGTGTAAAGGCCACGAAGGATGCCAGAAGGTACCCATAGGTAACAAGCGACACTAT  
GGATCTGATCTGGGGCCAGGTACCTCTATCTTGGTGATCTGGTTAAAAAACGCTCTAGTGGGCCAAAACCCGGGGGGGATCC  
CCGTTTTCTTTTATTTTATCAATGCCACTATGAGGACAATTAAGAGGATTCAGATATGGCGACCGGAGGGGTCAGTTC  
AGTTGATTTCCATTGATAGTGGAACTAACTGAACTGACCACTCCGGTCGCCATATCTGCAATACTCTTAATTTGTCTCCAT  
AGTGGCATTGATAAAAATAAAAGGAAACCGGGGATCCCCCGGGTTTTGGCCACTAGACGTTTTTTTAAACCAGATCACCAA  
GATAGAGGTACCTGGCCCCAGATCAGATCCATAGTGTGCTTGTACCTATGGGTACCTTCTGGGCATCCTTCGTGGGCC  
TTACAAC TAGTGTTCGACA

>SRR2298573.768241 768241 length=500

CAAGATAGAGGTACCTGGCCCCAGATCAGATCCATAGTGTGCTTGTACCTATGGGTACCTTCTGGGCATCCTTCGTGG  
GCCTTACAAC TAGTGTTCGACTACTACCAGATCGGTAGGTACTAAGTATCTTCCACAACATCTCAGGTTTTAGAACCAAT  
CCTAAAGGGTTTTGTTAAACCTTGGCTTTTTGGCCCCAGAGGCACCTGTTACCAGGTGTTGTTCCGCTGGCAAAAGGATGCT  
TTAAAGCAAATTTGTGAGACGTCTGGTGACGTGTGGGAACTTATTGGAAAACAACATTTTGGCTGTAAAGCATCCTATTGCCA  
GCGGAACAACACCTGGTAACAGGTGCCCTCTGGGGCCAAAAGCCAAGGTTTAAACAAACCCCTTTAGGATTGGTTCTAAAACCT  
GAGAGGTTGTGGAAGATACTTAGTACCTACCGATCTGGTAGTAGGGCAAACACCAGTTGTAAAGGCCCCAGAAGGATGCCC  
CGAAGGGACCCAAAAGGGAAA

>SRR2298573.768083 768083 length=500

CTGTAAAGCATCCTATTGCCAGCGGAACAACACCTGGTAACAGGTGCCCTCTGGGGCCAAAAGCCAAGGTTTAAACAAACCC  
TTTAGGATTGGTTCTAAAACCTGAGATGTTGTGGAAGATACTTAGTACCTACCGATCTGGTAGTAGTGCAAACTAGTGTG  
TAAGGCCACGAAGGATGCCAGAAGGTACCCATAGGTAACAAGCGAAAATATGGATCTGATCTGGGGCCAGGTACCTCT  
ATCTTGGCTGCCAAGATAGAGGTACCTGGCCCCAGATCAGATCCATAGTGTGCTTGTACCTATGGGTACCTTCTGGGC  
ATCCTTCGTGGGCCTTACAAC TAGTGTTCGACTACTACCAGATCGGTAGGTACTAAGTATCTTCCACAACATCTCAGGT  
TTAGAACCAATCCTAAAGGGTTTTGTTAAACCTTGGCTTTTTGGCCCCAGAGGCACCTGTTACCAGGGGTTGTTCCGCTGGC  
AATAGGATGCTTTACAGCGG

>SRR2298573.758331 758331 length=500

TCCTTCGTGGGCCCTTACAAC TAGTGTTCGACTACTACCAGATCGGTAGGTACTAAGTATCTTCCACAACATCTCAGGTT  
TAGAACCAATCCTAAAGGGTTTTGTTAAACCTTGGCTTTTTGGCCCCAGAGGCACCTGTTACCAGGTGTTGTTCCGCTGGCA  
ATAGGATGCTTTACAGCAAAAATGTTGTTTCCAATAAGTTCCACACGTCACCAGACGCTACCAAACCTTACTAGAGGATG

GCTGTGTGAGCTATTAGTGAGATAACCATGCTTGTGGACCTTATGCTCACACAGCCATCCTCTAGTAAGTTTGTGAGACGT  
CTGGTGACGTGTGGGAACTTATTGGAAAACAACATTTTGTCTGTAAGCATCCTATTGCCAGCGGAACAACACCTGGTAAACA  
GGGGCCTCTGGGGCCAAAAGCCAAGGTTTAAACAAACCCTTTAGGATTGGTTCTAAACCTGGAATGTTTGGGAAAAAACTT  
AGTACCACACGATTTGGTGG

>SRR2298573.748266 748266 length=500

GTGTTTGCCTACTACCAGATCGGTAGGTACTAAGTATCTTCCACAACATCTCAGGTTTAGAACCAATCCTAAAGGGTTT  
GTTAAACCTTGGCTTTTGGCCCCAGAGGCACCTGTTACCAGGTGTTGTTCCGCTGGCAATAGGATGCTTTACAGCAAAAT  
GTTGTTTCCAATAAGTTCCCACACGTCACCAGACGCTCACAAAACCTTACTAGAGGATGGCTGTGTGAGCATAAGTCCAC  
AAGCATGGAACATAATTAGTGAGATAACCATGCTTGTGGACCTTATGCTCACACAGCCATCCTCTAGTAAGTTTGTGAGACGT  
CTGGTGACGTGTGGGAACTTATTGGAAAACAACATTTTGTCTGTAAGCATCCTATTGCCAGCGGAACAACACCTGGTAAACA  
GGTGCCCTCTGGGGCCAAAAGCCAAGGTTTAAACAAACCCTTTAGGATTGGTTCTAAACCTGAGATGTTGTGGAAGAAACTT  
AGAACCAACCGATCTGGTAG

>SRR2298573.740858 740858 length=500

GGCCAAAAGCCAAGGTTTAAACAAACCCTTTAGGATTGGTTCTAAACCTGAGATGTTGTGGAAGATACTTAGTACCTACCG  
ATCTGGTAGTAGTGCAAACACTAGTTGTAAGGCCACGAAGGATGCCCAGAAGGTACCCATAGGTAACAAGCGACACTAT  
GGATCTGATCTGGGGCCAGGAACCTCTATCTTGGGGATCTGGTTAAAAAACGCTCTAGTGGGCCAAAACCCGGGGGGGATCC  
CCGTTTCTCTCCATAGTGGCATTGATAAAAATAAAAGGAAACCGGGGATCCCCCCCCGGGTTTGGCCACTAGACGTTTTT  
TTAACCAGATCACCAAGATAGAGGTACCTGGCCCCAGATCAGATCCATAGTGTGCGCTTGTACCTATGGGTACCTTCTGG  
GCATCCTTCGTGGGCCTTACAACCTAGTGTTCGACTACTACCAGATCGGTAGGTACTAAGTATCTTCCACAACATCTCAG  
GTTTAGAACCAATCCTAAAAG

>SRR2298573.730447 730447 length=500

GCCTCTGGGGCCAAAAGCCAAGGTTTAAACAAACCCTTTAGGATTGGTTCTAAACCTGAGATGTTGTGGAAGATACTTAGT  
ACCTACCGATCTGGTAGTAGTGCAAACACTAGTTGTAAGGCCACGAAGGATGCCCAGAAGGTACCCATAGGTAACAAGC  
GCCACTATGGATCTGATCTGGGGCCAGGTACCTCTATCTTGGTGATCTGGTTAAAAAACGCTCTAGTGGGCCAAAACCCGGG  
GGGATCCCCGTTCCAGTTGTGGTTGCCTGTACTACATCTTGTTCCTCTGGTTTCAAGTGTGTAGCATAGCAATTTGGTC  
CGAGCACATTAGAAGCATCATCTGCAACTTTGGTTAATAAATTAACCTCAATTTTCAATACCTACATTTTCCACTCTCTCA  
TTAACTACATTTGATAGTGGAAATCAACTGAACTGACCCTCCGGTCGCCAAAATCTGCAAAAACCTTAAATTTGTCCCCATAGT  
GGCATGGATAAAAAAAAAAAGA

>SRR2298573.728808 728808 length=500

TCTGGGGCCAAAAGCCAAGGTTTAAACAAACCCTTTAGGATTGGTTCTAAACCTGAGATGTTGTGGAAGATACTTAGTACC  
TACCGATCTGGTAGTAGTGCAAACACTAGTTGTAAGGCCACGAAGGATGCCCAGAAGGTACCCATAGGTAACAAGCGAC  
ACTATGGATCTGATCTGGGGCCAGGTACCTCTATCTTGGTGATCTGGTTAAAAAACGTCAGTGGGCCAAAACCCGGGGGG  
GGTCCCCGTTCTCATTAACTACATTTGATAGTGGAAATCAACTGAACTGACCCTCCGGTCGCCATATCTGCAATACTCT  
TAATTTGTCTCCATAGTGGCATTGATAAAAATAAAAGGAAACCGGGGATCCCCCCCCGGGTTTGGCCACTAGACGTTTTTTA  
ACCAGATCACCAAGATAGAGGTACCTGGCCCCAGATCAGATCCATAGTGTGCGTTGTTACCTATGGGTACCTTCTGGGCA  
TCCTTCGTGGGCCTTACAAC

>SRR2298573.727100 727100 length=500

GCCATCCTCTAGTAAGTTTGTGAGACGTCTGGTGACGTGTGGGAACTTATTGGAAAACAACATTTTGTCTGTAAGCATCCT  
ATTGCCAGCGGAACAACACCTGGTAAACAGGTGCCTCTGGGGCCAAAAGCCAAGGTTTAAACAAACCCTTTAGGATTGGTTCT  
TAAACCTGAGATGTTGTGGAAGATACTTAGTACCTACCGATCTGGTAGTAGTGCAAACACTAGTTGTAAGGCCCCCGAAG  
AATGCCCAGAAAATAAAAGGAAACCGGGGATCCCCCCCCGGGTTTGGCCACTAGACGTTTTTTAACCAGATCACCAAGAT  
AGAGGTACCTGGCCCCAGATCAGATCCATAGTGTGCGTTGTTACCTATGGGTACCTTCTGGGCATCCTTCGTGGGCCTTA  
CAACTAGTGTTCGACTACTACCAGATCGGTAGGTACTAAGAATCTTCCACAACATCCCAGGTTTLAGAACCAAAACCTAAA  
GGGTTGGTTAAACCTTGGCT

>SRR2298573.652172 652172 length=500

CTGTATTAGTGAGATAACCATGCTTGTGGACCTTATGCTCACACAGCCATCCTCTAGTAAGTTTGTGAGACGTCTGGTGAC  
GTGTGGGAACTTATTGGAAAACAACATTTTGTCTGTAAGCATCCTATTGCCAGCGGAACAACACCTGGTAAACAGGTGCCTC  
TGGGGCCAAAAGCCAAGGTTTAAACAAACCCTTTAGGATTGGTTCTAAACCTGAGATGTTGTGGAAGATACTTAGTACCTA  
CCGATCTGGAGATCAGATCCATAGTGTGCGCTTGTACCTATGGGTACCTTCTGGGCATCCTTCGTGGGCCTTACAACCTAG  
TGTTTGCCTACTACCAGATCGGTAGGTACTAAGTATCTTCCACAACATCTCAGGTTTLAGAACCAATCCTAAAGGGTTTGT  
TTAAACCTTGGCTTTTGGCCCCAGAGGCACCTGTTACCAGGTGTTGTTCCGCTGGCAATAGGATGCTTTACAGCAAAAAG  
TTGTTTCCAATAAGTTCCCA

>SRR2298573.648942 648942 length=500

CTCATTAACTACATTTGATAGTGGAAATCAACTGAACTGACCCTCCGGTCGCCATATCTGCAATACTCTTAAATTTGTCTCCA  
TAGTGGCATTGATAAAAATAAAAGGAAACCGGGGATCCCCCCCCGGGTTTGGCCACTAGACGTTTTTTAACCAGATCACCA  
AGATAGAGGTACCTGGCCCCAGATCAGATCCATAGTGTGCGCTTGTACCTATGGGTACCTTCTGGGCATCCTTCGTGGGC  
CTTACAACAGGTTTAAACAAACCCTTTAGGATTGGTTCTAAACCTGAGATGTTGTGGAAGATACTTAGTACCTACCGATC  
TGGTAGTAGTGCAAACACTAGTTGTAAGGCCACGAAGGATGCCCAGAAGGTACCCATAGGTAACAAGCGACACTATGGA  
TCTGATCTGGGGCCAGGTACCTCTATCTTGGTGATCTGGTTAAAAAACGCTCTAGTGGGCCAAAACCGGGGGGGATCCCCG

GTTTCCTTTTATTTTATCAA  
>SRR2298573.646801 646801 length=500  
GATCAGATCCATAGCGTCGCTTGTACCTATGGGTACCTTCTGGGCATCCTTCGTGGGCCTTACAACCTAGTGTGTTGCACT  
ACTACCAGATCGGTAGGTACTAAGTATCTTCCACAACATCTCAGGTTTAGAACCAATCCTAAAGGGTTTGTAAACCTTG  
GCTTTTGGCCCCAGAGGCACCTGTTACCAGGTGTTGTTCCGCTGGCAATAGGATGCTTTACAGCAAAATGTTGTTTCCAA  
TAAGTTCACACCCACATCTTGTGTGGGGTGGCAGATGGCGTGCCATAGCTCTATTAGTGAGATACCATGCTTGTGGACCT  
TATGCTCACACAGCCATCCTCTAGTAAGTTTGTGAGACGTCTGGTGACGTGTGGGAACCTTATTGGAAACAACATTTTGTCT  
GTAAAGCATCCTATTGCCAGCGGAACAACACCTGGTAACAGGTGCCTCTGGGGCCAAAAGCCAAGGTTTAAACAAACCTT  
TAGGATTGGTTCTAAACCTG  
>SRR2298573.641626 641626 length=500  
TCTCCATAGTGGCATTGATAAAAAATAAAAGGAAAACCGGGGATCCCCCCCCGGGTTTGGCCCCACTAGACGTTTTTTAAACCAGA  
TCACCAAGATAGAGGTACCTGGCCCCAGATCAGATCCATAGTGTGCTTGTACCTATGGGTACCTTCTGGGCATCCTTC  
GTGGGCCCTTACAACCTAGGGTTTGCCTACTACCAGATCGGTAGGTACTAAGTATCTTCCACAACATCTCAGGTTTAGAAC  
CAATCCTAAGAACAACCTTTAGGATTGGTTCTAAACCTGAGATGTTGTGGAAGATACTTAGTACCTACCGATCTGGTA  
GTAGTGCAAACACTAGTTGTAAGGCCACGAAGGATGCCAGAAGGTACCCATAGGTAACAAGCGACACTATGGATCTGA  
TCTGGGGCCAGGTACCTCTATCTTGGTGATCTGGTTAAAAAACCTCTAGTGGGCCAAAACCGGGGGGATCCCCGGGTT  
CTTTTATTTTATCAATGCC  
>SRR2298573.632870 632870 length=500  
CTTGTACCTATGGGTACCTTCTGGGCATCCTTCGTGGGCCTTACAACCTAGTGTGTTGCACTACTACCAGATCGGTAGGTA  
CTAAGTATCTTCCACAACATCTCAGGTTTAGAACCAATCCTAAAGGGTTTGTAAACCTTGGCTTTTGGCCCCAGAGGCA  
CCTGTTACCAGGGTGTGTTCCGCTGGCAATAGGATGCTTTACAGCAAAATGTTGTTTCCAAAAAGTTCCACACGTCACC  
AGACGTCTCACTAGTAAGTTTGTGAGACGTCTGGTGACGTGTGGGAACCTTATTGGAAACAACATTTTGTCTGTAAGCATC  
CTATTGCCAGCGGAACAACACCTGGTAACAGGTGCCTCTGGGGCCAAAAGCCAAGGTTTAAACAAACCTTTAGGATTGGT  
TCTAAACCTGAGATGTTGTGGAAGATACTTAGTACCTACCGATCTGGTAGTAGTGCAAAACACTAGTTGTAAGGCCCCGA  
AGGATGCCAAAAGGAACCC  
>SRR2298573.631546 631546 length=500  
CTTGTACCTATGGGTACCTTCTGGGCATCCTTCGTGGGCCTTACAACCTAGTGTGTTGCACTACTACCAGATCGGTAGGTA  
CTAAGTATCTTCCACAACATCTCAGGTTTAGAACCAATCCTAAAGGGTTTGTAAACCTTGGCTTTTGGCCCCAGAGGCA  
CCTGTTACCAGGTGTGTTCCGCTGGCAATAGGATGCTTTACAGCAAAATGTTGTTTCCAAAAAGTTCCACACGTCACC  
AGACGGTCAAGTTGTGAGACGTCTGGTGACGTGTGGGAACCTTATTGGAAACAACATTTTGTCTGTAAGCATCCTATTGCC  
AGCGGAACAACACCTGGTAACAGGTGCCTCTGGGGCCAAAAGCCAAGGTTTAAACAAACCTTTAGGATTGGTCTAAACC  
TGAGATGTTGTGGAAGATACTTAGTACCTACCGATCTGGCAGAAGTGCAAAAACACTAGTGGTAAGGCCACGAAGGATGCC  
CAGAAGGTACCCATAGGTAA  
>SRR2298573.612592 612592 length=500  
GGGTACCTTCTGGGCATCCTTCGTGGGCCTTACAACCTAGTGTGTTGCACTACTACCAGATCGGTAGGTACTAAGTATCTTC  
CACAAACATCTCAGGTTTAGAACCAATCCTAAAGGGTTTGTAAACCTTGGCTTTTGGCCCCAGAGGCACCTGTTACCAGG  
TGTTGTTCCGCTGGCAATAGGATGCTTTACAGCAAAATGTTGTTTCCAAATAAGTTCCACACGTCACCAAAACGTCCTCCA  
AACTTACTAGATTAGTGAGATAACCATGCTTGTGGACCTTATGCTCACACAGCCATCCTCTAGTAAGTTTGTGAGACGTCT  
GGTGACGTGTGGGAACCTTATTGGAAACAACATTTTGTCTGTAAGCATCCTATTGCCAGCGGAACAACACCTGGTAACAGG  
TGCTCTAGGGCCAAAAGCCAAGGTTTAAACAAACCTTTAGGATTGGTCTAAACCTGAGATGTTGTGGAAGATACTTAG  
AACCTCCCGATCCGGGAGTA  
>SRR2298573.596753 596753 length=500  
GCTGTAAAGCATCCTATTGCCAGCGGAACAACACCTGGTAACAGGTGCCTCTGGGGCCAAAAGCCAAGGTTTAAACAAAC  
CTTTAGGATTGGTCTAAACCTGAGATGTTGTGGAAGATACTTAGTACCTACCGATCTGGTAGTAGTGCAAAACACTAGTT  
GTAAGGCCACGAAGGATGCCAGAAGGTACCCATAGGTAACAAGCGACACTATGGATCTGATCTGGGGCCAGGGACCTC  
TATCTTGGGGCTTAATTGTCTCCATAGTGGCATTGATAAAAAATAAAAGGAAAACCGGGGATCCCCCCCCGGGTTTGGCCCCACT  
AGACGTTTTTTAAACCAGATCACCAAGATAGAGGTACCTGGCCCCAGATCAGATCCATAGTGTGCTTGTACCTATGGGT  
ACCTTCTGGGCATCCTTCGTGGGCCTTACAACCTAGTGTGTTGCACTACTACCAGATCGGTAGGTACTAAGGATCTTCCACA  
AAATCCCAGGTTTAGAACCA  
>SRR2298573.559918 559918 length=500  
CGTCTGGTGACGTGTGGGAACCTTATTGGAAACAACATTTTGTCTGTAAGCATCCTATTGCCAGCGGAACAACACCTGGTA  
ACAGGTGCCTCTGGGGCCAAAAGCCAAGGTTTAAACAAACCTTTAGGATTGGTTCTAAACCTGAGATGTTGTGGAAGATA  
CTTAGTACCTACCGATCTGGTAGTAGTGCAAAACACTAGTTGTAAGGCCACGAAGGATGCCAGAAGGGACCCATAGGTA  
ACAAGCGACACCAAGATAGAGGTACCTGGCCCCAGATCAGATCCATAGTGTGCTTGTACCTATGGGTACCTTCTGGGC  
ATCCTTCGTGGGCCTTACAACCTAGTGTGTTGCACTACTACCAGATCGGTAGGTACTAAGTATCTTCCACAACATCTCAGGT  
TTAGAACCAATCCTAAAGGGTTTGTAAACCTTGGCTTTTGGCCCCAGAGGCACCTGTTACCAGGTGTGGGTCCGCGGGC  
AATAGGAGGCTTTACAGCAA  
>SRR2298573.545454 545454 length=500  
CAGCGGAACAACACCTGGTAACAGGTGCCTCTGGGGCCAAAAGCCAAGGTTTAAACAAACCTTTAGGATTGGTCTAAAC

CTGAGATGTTGTGGAAGATACTTAGTACCTACCGATCTGGTAGTAGTGCAAACACTAGTTGTAAGGCCACGAAGGATGC  
CCAGAAGGTACCCATAGGTAACAAGCGACACTATGGATCTGATCTGGGGCCAGGTACCCCTATCTTGGTGATCTGGTTAA  
AAAAAGTCTAGAATCAACTGAACTGACCACTCCGGTCGCCATATCTGCAATACTCTTAATTTGTCTCCATAGTGGCATTGA  
TAAAAATAAAGGAAACCGGGGATCCCCCGGGTTTGGCCCACTAGACGTTTTTTTAAACCAGATCACCAAGATAGAGGTAC  
CTGGCCCCAGATCAGATCCATAGTGTGCTTGTACCTATGGGTACCTTCTGGGCATCCTTCGTGGGCCCTTACAACACTAGC  
GTTTGCCTACTACCAGATC

>SRR2298573.541824 541824 length=500

CTCTTAATTTGTCTCCATAGTGGCATTGATAAAAATAAAGGAAACCGGGGATCCCCCGGGTTTGGCCCACTAGACGTTT  
TTTAAACCAGATCACCAAGATAGAGGTACCTGGCCCCAGATCAGATCCATAGTGTGCTTGTACCTATGGGTACCTTCTG  
GGCATCCTTCGTGGGCCCTTACAACACTAGTGTTTGCACTACTACCAGATCGGTAGGTACTAAGAATCTTCAACAACATCTCA  
GGTTTLAGAACCTTTAGGATTGGTTCTAAACCTGAGATGTTGTGGAAGATACTTAGTACCTACCGATCTGGTAGTAGTGCA  
AACACTAGTTGTAAGGCCACGAAGGATGCCAGAAAGGTACCCATAGGTAACAAGCGACACTATGGATCTGATCTGGGGC  
CAGGTACCTCTATCTTGGTGATCTGGTTAAAAAACGTTAGTGGGCCAAACCGGGGGGATCCCCGGTTTCTTTTATT  
TTATCAATGCCACTATGGAG

>SRR2298573.534734 534734 length=500

CTCTCATTAACCTACATTGATAGTGAATCAACTGAACTGACCACTCCGGTCGCCATATCTGCAATACTCTTAATTTGTCTC  
CATAGTGGCATTGATAAAAATAAAGGAAACCGGGGATCCCCCGGGTTTGGCCCACTAGACGTTTTTTTAAACCAGATCAC  
CAAGATAGAGGTACCTGGCCCCAGATCAGATCCATAGTGTGCTTGTACCTATGGGTACCTTCTGGGCATCCTTCGTGG  
GCCTTACAACCTGTGGGAACTTATTTGAAAACAACATTTTGTCTGTAAGCATCCTATTGCCAGCGGAACAACACCTGGTAA  
AGGTGCCCTCTGGGGCCAAAAGCCAAGGTTTAAACAAACCTTTAGGATTGGTTCTAAACCTGAGATGTTGTGGAAGATACT  
TAGTACCTACCGATCTGGTAGTAGGGCAAAACACTAGTTGTAAGGCCACGAAGGATGCCAGAAAGGAAACCAAAAGGAAAC  
AAGCGACACAATGGACCGGC

>SRR2298573.530527 530527 length=500

GCTGTAAAGCATCCTATTGCCAGCGGAACAACACCTGGTAACAGGTGCCTCTGGGGCCAAAAGCCAAGGTTTAAACAAC  
CTTTAGGATTGGTTCTAAACCTGAGATGTTGTGGAAGATACTTAGTACCTACCGATCTGGTAGTAGTGCAAACACTAGTT  
GTAAGGCCACGAAGGATGCCAGAAAGGTACCCATAGGTAACAAGCGACACTATGGATCTGATCTGGGGCCAGGAACCTC  
TATCTTGGGGGTATCTGGTTTCACTGTTGTAGCATAGCAATTTGGTCCGAGCACATTAGAAGCATCATCTGCAACTTTGG  
TTAATAAAATTAACCTCCAATTTTCACTTACCTACATTTTCCACTCTCTCATTAACCTACATTGATAGTGGAAATCAACTGAACTG  
ACCACTCCGGTCGCCATATCTGCAATACTCTTAATTTGTCTCCAAAAGTGGCATTGATAAAAATAAAGGAAACAGGGGATCC  
CCCCGGGTTGGGCCCTA

>SRR2298573.525129 525129 length=500

TAGTGGCATTGATAAAAATAAAGGAAACCGGGGATCCCCCGGGTTTGGCCCACTAGACGTTTTTTTAAACCAGATCACCA  
AGATAGAGGTACCTGGCCCCAGATCAGATCCATAGTGTGCTTGTACCTATGGGTACCTTCTGGGCATCCTTCGTGGGC  
CTTACAACCTAGTGTTTGCACTACTACCAGATCGGTAGGTACTAAGAATTTTCCAAACATCTCAGTTTLAGAACCAACCC  
TAAAGGGTTGACCTTATGCTCACACAGCCATCCTCTAGTAAGTTTGTGAGACGCTCTGGTGACGTGTGGGAACCTTATTGGA  
AACACATTTTGTCTGTAAGCATCCTATTGCCAGCGGAACAACACCTGGTAACAGGTGCCTCTGGGGCCAAAAGCCAAGG  
TTTAAACAACCTTTAGGATTGGTTCTAAACCTGAGATGTTGTGGAAGATACTTAGTACCTACCGATCTGGTAGTAGTG  
AAACCCAGTTGTAAGGCC

>SRR2298573.501455 501455 length=500

GGTTTAAACAACCTTTAGGATTGGTTCTAAACCTGAGATGTTGTGGAAGATACTTAGTACCTACCGATCTGGTAGTAGT  
GCAAACACTAGTTGTAAGGCCACGAAGGATGCCAGAAAGGTACCCATAGGTAACAAGCGACACTATGGATCTGATCTGG  
GGCCAGGTACCTCTATCTTGGTGATCTGGTTAAAAAACGTTAGTGGGCCAAACCGGGGGGATCCCCGGTTTCTTTT  
ATTTTATCAATAATTTGTCTCCATAGTGGCATTGATAAAAATAAAGGAAACCGGGGATCCCCCGGGTTTGGCCCACTAG  
ACGCTTTTTTAAACCAGATCACCAAGATAGAGGTACCTGGCCCCAGATCAGATCCATAGTGTGCTTGTACCTATGGGTAC  
CTTCTGGGCATCCTTCGTGGGCCCTTACAACACTAGTGTTTGCACTATTACCAGATCGGTAGGTACTAAGAATCTTCAACACA  
ATCCCAGTTTLAGAACCAAC

>SRR2298573.489142 489142 length=500

ACTCTTAATTTGTCTCCATAGTGGCATTGATAAAAATAAAGGAAACCGGGGATCCCCCGGGTTTGGCCCACTAGACGTT  
TTTTAACCAGATCACCAAGATAGAGGTACCTGGCCCCAGATCAGATCCATAGTGTGCTTGTACCTATGGGTACCTTCT  
GGGCATCCTTCGTGGGCCCTTACAACACTAGTGTTTGCACTACTACCAGATCGGAAGGTACTAAGAATTTTCCACAACATCCC  
AGGTTTAGACCTTTAGGATTGGTTCTAAACCTGAGATGTTGTGGAAGATACTTAGTACCTACCGATCTGGTAGTAGTGCA  
AACACTAGTTGTAAGGCCACGAAGGATGCCAGAAAGGTACCCATAGGTAACAAGCGACACTATGGATCTGATCTGGGGC  
CAGGTACCTCTATCTTGGTGATCTGGTTAAAAAACGTTAGTGGGCCAAACCGGGGGGATCCCCGGTTTCTTTTATT  
TTATCAATGCCACCATGGAG

>SRR2298573.461742 461742 length=500

GAACAACACCTGGTAACAGGTGCCTCTGGGGCCAAAAGCCAAGGTTTAAACAACCTTTAGGATTGGTTCTAAACCTGAG  
ATGTTGTGGAAGATACTTAGTACCTACCGATCTGGTAGTAGTGCAAACACTAGTTGTAAGGCCACGAAGGATGCCAGAA  
AGGTACCCATAGGTAACAAGCGACACTATGGATCTGATCTGGGGCCAGGAACCTCTATCTTGGTGATCTGGTTAAAAAAC  
GTCTAGTGGGCTCTCATTAACCTACATTGATAGTGAATCAACTGAACTGACCACTCCGGTCGCCATATCTGCAATACTCT

TAATTGTCTCCATAGTGGCATTGATAAAAAATAAAAGGAAAACCGGGGATCCCCCGGGTTTGGCCCCACTAGACGTTTTTTTA  
ACCAGATCACCACGATAGAGGTACCTGCCCCAGATCAGATCCAAAGGGTCGCTTGTACCTATGGGTACCTTCTGGGCA  
CCCTTCTGGGGCCTTCCAAC

>SRR2298573.446220 446220 length=500

GGTACCTTCTGGGCATCCTTCGTGGGCCTTACAACCTAGTGTGTTGCACTACTACCAGATCGGTAGGTACTAAGTATCTTCC  
ACAACATCTCAGGTTTAGAACCAATCCTAAAGGGTTTGTAAACCTTGGCTTTTGGCCCCAGAGGCACCTGTTACCAGGT  
GTTGTTCCGCTGGCAATAGGATGCTTTACCGCAAAATGTTGTTTCCAATAAGTTCCCACACGTACCAGACCTTATGCT  
ACTTACTAAGGGTTTGGCCAACCTAGACGTTTTTTAAACCAGATCACCAAGATAGAGATACCATGCTTGTGGACCTTATGCT  
CACACAGCCATCCTCTAGTAAGTTTGTGAGACGCTCGGTGACGTGTGGGAACCTTATTGGAAACAACATTTTGTCTGTAAG  
CATCCTATTGCCAGCGGAACAACACCTGGTAACAGGTGCCTCTGGGGCCCAAAGCCAAGGGTTAACAAAACCTTTTGGAT  
TGGTTCTAAAACCTGAGCTTT

>SRR2298573.419905 419905 length=500

CTGTAAAGCATCCTATTGCCAGCGGAACAACACCTGGTAACAGGTGCCTCTGGGGCCAAAAGCCAAGGTTTAAACAAACCC  
TTTAGGATTGGTTCTAAACCTGAGATGTTGTGGAAGATACTTAGTACCTACCGATCTGGTAGTAGTGCAAAACTAGTTG  
TAAGGCCACGAAGGATGCCAGAAGGTACCCATAGGTAACAAGCGACACTATGGATCTGATCTGGGGCCAGGTACCCCT  
ATCTTGGGGACAACCTGAACTGACCCTCCGGTCGCCATATCTGCAATACTCTTAATTGTCTCCATAGTGGCATTGATAAA  
ATAAAAGGAAAACCGGGGATCCCCCGGGTTTGGCCCCACTAGACGTTTTTTTAAACCAGATCACCAAGATAGAGGTACCGG  
GCCCCAGATCAGATCCATAGTGTGCTTGTACCTATGGGTACCTTCTGGGAAACCTTCTAGGGCCTTACAACCTAGTGT  
TGCACTACTCCAGATCGGG

>SRR2298573.415056 415056 length=500

GTGCAAACTAGTTGTAAGGCCACGAAGGATGCCAGAAGGTACCCATAGGTAACAAGCGACACTATGGATCTGATCT  
GGGGCCAGGTACCTCTATCTTGGTGATCTGGTTAAAAACGTTCTAGTGGGCCAAAACCCGGGGGGGATCCCCGGTTTCCCT  
TTATTTTATCAATGCCACTATGGAGACAATTAAGAGTATTCGAGATATGGCGACCGGAGTGGTCAGTTTCACTTGAATCCA  
CTATCAATGGGCCACTTCCAATTTCACTTACCTACATTTTCCACTCTCTCATTAACCTACATTGATAGTGGAACTCACTGA  
ACTGACCCTCCGGTCGCCATATCTGCAATACTCTTAATTGTCTCCATAGTGGCATTGATAAAAATAAAAGGAAAACCGGGG  
ATCCCCCGGGTTTGGCCCACTAGACGTTTTTTTAAACCAGATCACCAAGATAGAGGAACCTGGCCCCAGACCAGATCCAA  
AGTTGCCCTGGTTACCTTGG

>SRR2298573.393997 393997 length=500

TGTCGCTTGTACCTATGGGTACCTTCTGGGCATCCTTCGTGGGCCTTACAACCTAGTGTGTTGCACTACTACCAGATCGGT  
AGGTAATAAGTATCTTCCACAACATCTCAGGTTTAGAACCAATCCTAAAGGGTTTGTAAACCTTGGCTTTTGGCCCCAG  
AGGCACCTGTTACCAGGTGTTGTTCCGCTGGCAATAGGATGCTTTACAGCAAAATGTTGTTTCCAATAAGTTCCCACACG  
GCACCAGACGCTCTAGTAAGTTTGTGAGACGCTCGGTGACGTGTGGGAACCTTATTGGAAACAACATTTTGTCTGTAAGC  
ATCCTATTGCCAGCGGAACAACACCTGGTAACAGGTGCCTCTGGGGCCAAAAGCCAAGGTTTAAACAAACCTTTTAGGATT  
GGTTCTAAACCTGAGATGTTGTGGAAGATACTTAGTAACTACCGATCTGGCAGTAGGGCAAACACAAGTTGTAAGGCCCA  
CGACGGATCCCCAGAAGGTC

>SRR2298573.340661 340661 length=500

GCGTAAGTTTGTGAGACGCTCGGTGACGTGTGGGAACCTTATTGGAAACAACATTTTGTCTGTAAGCATCCTATTGCCAGC  
GGAGCAACACCTGGTAACAGGTGCCTCTGGGGCCAAAAGCCAAGGTTTAAACAAACCTTTAGGATTGGTTCTAAAACCTGA  
GATGTTGTGGAAGATACTTAGTACCTACCGATCTGGTAGTAGTGCAAAAACCTAGTTGTAAGGCCACGAAGGATGCCAG  
AAGGCACCCAAATAAAAGGAAAACCGGGGATCCCCCGGGTTTGGCCCACTAGACGTTTTTTTAAACCAGATCACCAAGATA  
GAGGTACCTGGCCCCAGATCAGATCCATAGTGTGCTTGTACCTATGGGTACCTTCTGGGCATCCTTCGTGGGCCTTAC  
AACTAGTGTGTTGCACTACTACCAGATCGGTAGGTACTAAGTATCTTCCACAACATCTCAGGTTTAGAACCAATCCTAAAG  
GGTTTGTAAACCATGGCTT

>SRR2298573.331041 331041 length=500

CTCTCATTAACCTACATTGGTAGTGGAAATCAACTGAACTGACCCTCCGGTCGCCATATCTGCAATACTCTTAATTGTCTC  
CATAGTGGCATTGATAAAAAATAAAAGGAAAACCGGGGATCCCCCGGGTTTGGCCCCACTAGACGTTTTTTTAAACCAGGTAC  
CAAGATAGAGGTACCTGGCCCCAGATCAGATCCATAGTGTGCTTGTACCTATGGGTACCTTCTGGGCATCCTTCGTGG  
GCCTTACAACCTTCTAAACCTGAGATGTTGTGGAAGATACTTAGTACCTACCGATCTGGTAGTAGTGCAAAACTAGTTGT  
AAGGCCACGAAGGATGCCAGAAGGTACCCATAGGTAACAAGCGACACTATGGATCTGATCTGGGGCCAGGTACCTCTA  
TCTTGGTGACCTGGTTAAAAAACGCTTAGTGGGCCAAAACCCGGGGGGGATCCCCGGTTTCTTTTATTTATCAAAGGCCA  
CCATGGGACAATTAAGATC

>SRR2298573.322756 322756 length=500

TTTTTAAACCAGATCACCAAGATAGAGGTACCTGGCCCCAGATCAGATCCATAGTGTGCTTGTACCTATGGGTACCTTC  
TGGGCATCCTTCGTGGGCCTTACAACCTAGTGTGTTGCACTACTACCAGATCGGTAGGTACTAAGTATCTTCCACAACATCT  
CAGGTTTAGAACCAATCCTAAAGGGTTTGTAAACCTTGGCTTTTGGCCCCAAAAGGCACCTGTTACCAGGGGTTGTTCCG  
CTGGCAATAGGGAAAACAACATTTTGTCTGTAAGCATCCTATTGCCAGCGGAACAACACCTGGTAACAGGTGCCTCTGGGG  
CCAAAAGCCAAGGTTTAAACAAACCTTTTAGGATTGGTTCTAAACCTGAGATGTTGTGGAAGATACTTAGTACCTACCGAT  
CTGGTAGTAGTGCAAAACTAGTTGTAAGGCCACGAAGGATGCCAGAAGGAACCCAAAAGGTAACAAGCGAACCAATGG  
ATCTGATCTGGGGCCAGGTC

>SRR2298573.320162 320162 length=500  
AACAAACCCCTTTAGGATTGGTTCTAAAACCTGAGATGTTGTGGAAGATACTTAGTACCTACCGATCTGGTAGTAGTGCAAA  
CACTAGTTGTAAGGCCACGAAGGATGCCAGAAAGGTACCCATAGGTAACAAGCGACACTATGGATCTGATCTGGGGCCA  
GGTACCTCTATCTTGGTGATCTGGTTAAAAAACGTCTAGTGGGCCAAAACCCGGGGGGGATCCCCGGTTTCTTTTATTTT  
ATAAATGCCATCTTTGTTCTCTGGTTTCAGCTGTTGTAGCATAGCAATTTGGTCCGAGCACATTTAGAAGCATCATCTGCAA  
CTTTGGTTAATAAATTACCTCCAATTTCACTACCTTCCACTCTCTCATTAACCTACATTGATAGTGGAAATCAACT  
GAACTGACCACTCCGGTCGCCATATCTGCAATACACTTAATTTGTTTCCATAGTGGCATTGATAAAACAAAAAGGAAACCG  
GGATCCCCCCCCGGGTTTGGC

>SRR2298573.291167 291167 length=500  
GGGTTTGGCCACTAGACGTTTTTTTAAACCAGATCACCAAGATAGAGGTACCTGGCCCCAGATCAGATCCATAGTGTGCGT  
TGTTACCTATGGGTACCTTCTGGGCATCCTTCGTGGGCCCTTACAACCTAGTGTTTGCACTACTACCAGATCGGTAGGTACT  
AAGTATCTTCCACAACATCTCAGGTTTAGAACCAATCCTAAAAGGGTTTGTAAACCTTGGCTTTTGGCCCCAGGGGCACC  
TGTTACCAGGTCTAGTAAGTTTGTGAGACGTCCGGTGACGTGTGGAACTTATTGGAAACAACATTTTGTCTGTAAAGCAT  
CCTATTGCCAGCGGAACAACACCTGGTAACAGGTGCCTCTGGGGCCAAAAGCCAAGGTTTAAACAAACCTTTAGGATTGG  
TTCTAAACCTGAGATGTTGTGGAAGATACTTAGTACCTACCGATCTGGTAGAAGTGCAAACACTAGTTGTAAGGCCACG  
AAGGAAGCCAGAAGGTACC

>SRR2298573.285881 285881 length=500  
CTCATTAACCTACATTTGATAGTGGAAATCAACTGAACTGACCACTCCGGTCGCCATATCTGCAATACTCTTAATTTGTCTCCA  
TAGTGGCATTGATAAAAAATAAAGGAAAACCGGGGATCCCCCCCCGGGTTTGGCCCCACTAGACGTTTTTTTAAACCAGATCACCA  
AGATAGAGGTACCTGGCCCCAGATCAGATCCATAGTGTCACTTGTACCTATGGGTACCTTCTGGGCATCCTTCGTGGGC  
CTTACAACAGACTTAGTACCTACCGATCTGGTAGTAGTGCAAAACTAGTTGTAAGGCCACGAAGGATGCCAGAAAGGT  
ACCCATAGGAAACAAGTGACACTATGGATCTGATCTGGGGCCAGGTACCTCTATCTTGGTGATCTGGTTAAAAAACGTCT  
AGTGGGCCAAAACCCGGGGGGGATCCCCGGTTTCTTTTTTTTTTATCAATGCCACTATGGAGACAATAAAAAAGAAATGAAG  
AAATGGGGCCCCGGGTGGGA

>SRR2298573.275061 275061 length=500  
TTTTTAAACCAGATCACCAAGATAGAGGTACCTGGCCCCAGATCAGATCCATAGTGTGCGTGTGTTACCTATGGGTACCTTC  
TGGGCATCCTTCGTGGGCCCTTACAACCTAGTGTTTGCACTACTACCAGATCGGTAGGTACTAAGTATCTTCCACAACATCT  
CAGGTTTAGAACCAATCCTAAAAGGGTTTGTAAACCTTGGCTTTTGGCCCCAGAGGAACCTGTTACCAGGTGTTGTTCCG  
CTGGCCATAGGTGTGGGAACTTATTGGAAACAACATTTTGTCTGTAAAGCATCCTATTGCCAGCGGAACAACACCTGGTAA  
CAGGTGCCTCTGGGGCCAAAAGCCAAGGTTTAAACAAACCTTTAGGATTGGTTCTAAACCTGAGATGTTGTGGAAGATAC  
TTAGTACCTACCGATCTGGTAGTAGTGCAAAACTAGTGGTAAGGCCACGAAGGATGCCAGAAAGGTACCCAAAGGTAA  
CAAACGAACCCATGGATCTG

>SRR2298573.258663 258663 length=500  
CGCCATATCTGCAATACTCTTAATTTGTCTCCATAGTGGCATTGATAAAAAATAAAGGAAAACCGGGGATCCCCCCCCGGGTTT  
GGCCCCACTAGACGTTTTTTTAAACCAGATCACCAAGATAGAGGTACCTGGCCCCAGATCAGATCCATAGTGTGCGTGTGTTAC  
CTATGGGTACCTTCTGGGCATCCTTCGTGGGCCCTTACAACCTAGTGTTTGCACTACTACCAAATCGGTAGGTCTTAAGAA  
CTTCCACAACAACAAACCCCTTTAGGATTGGTTCTAAAACCTGAGATGTTGTGGAAGATACTTAGTACCTACCGATCTGGTA  
GTAGTGCAAAACTAGTTGTAAGGCCACGAAGGATGCCAGAAAGGTACCCATAGGTAACAAGCGACACTATGGATCTGA  
TCTGGGGCCAGGTACCTCTATCTTGGTGATCTGGTTAAAAAACGTCTAGTGGGCCAAAACCCGGGGGGGATCCCCGGTTTCT  
CTTTTATTTTTTCAATGCC

>SRR2298573.251124 251124 length=500  
GTTGTAAGGCCACGAAGGATGCCAGAAAGGTACCCATAGGTAACAAGCGACACTATGGATCTGATCTGGGGCCAGGTAC  
CTCTATCTTGGTGATCTGGTTAAAAAACGTCTAGTGGGCCAAAACCCGGGGGGGATCCCCGGTTTCTTTTATTTTATCAA  
TGCCACTATGGAGACAATTAAGAGTATTGCAGATATGGCGACCGGAGTGGTCAGTTTCAGTTGATTCCACTATCAATGGAG  
TTAATGAGAGACCTACATTTTTCCACTCTCTCATTAACCTACATTGATAGTGGAAATCAACTGAACTGACCACTCCGGTCGCC  
ATATCTGCAATACTCTTAATTTGTCTCCATAGTGGCATTGATAAAAAATAAAGGAAAACCGGGGATCCCCCCCCGGGTTTGGCC  
CACTAGAGGTTTTTTAAACCAGATCACCAAGTTAGAGGTACCTGGCCCCAGATCAAATCCATAGAGCCGCTTGTAAACCAAT  
GGGACCTTCTGGGCACCCC

>SRR2298573.229096 229096 length=500  
AGGTTTAAACAAACCCCTTTAGGATTGGTTCTAAAACCTGAGATGTTGTGGAAGATACTTAGTACCTACCGATCTGGTAGTAG  
TGCAAACACTAGTTGTAAGGCCACGAAGGATGCCAGAAAGGTACCCATAGGTAACAAGCGACACTATGGATCTGATCTG  
GGCCAGGTACCTCTATCTTGGGGACCTGGTTAAAAAACGCTTAGTGGGCCAAAACCCGGGGGGGATCCCCGGTTTCTTTT  
TATTTTTTCAATGCCACTCCGGTCGCCATATCTGCAATACTCTAATTTGTCTCCATAGTGGCATTGATAAAAAATAAAGGA  
AACCAGGGATCCCCCCCCGGGTTTGGCCCCACTAGACGTTTTTTTAAACCAGATCACCAAGATAGAGGTACCTGGCCCCAGATC  
AGATCCATAGTGTGCGTTGTTACCTATGGGAACCTTCTGGGCATCCTTCGTGGGCCCTTACAACAAGGGTTTGCCTCCTC  
CCAGATCGGTAGGCACTAAG

>SRR2298573.212316 212316 length=500  
TCCTTCGTGGGCCCTTACAACCTAGTGTTTGCACTACTACCAGATCGGTAGGTACTAAGTATCTTCCACAACATCTCAGGTT  
TAGAACCAATCCTAAAAGGGTTTGTAAACCTTGGCTTTTGGCCCCAGAGGCACCTGTTACCAGGTGTTGTTCCGCTGGCA



ATAGGATGCTTTACAGCAAAAATGTTGTTTCCAATAAGTTCCCACACGTCACCAGACGTCCCACAAACTTACTAGAGGATG  
GCTGTGTGCGGACCTTATGCTCACACAGCCATCCTCTAGTAAGTTTGTGAGACGTCTGGTGACGTGTGGGAACTTATTGG  
AAACAACATTTTGTGCTGTAAAGCATCCTATTTGCCAGCGGAACAACACCTGGTAACAGGTGCCCTCTGGGGCCAAAAGCCAAG  
GTTTAAACAAAACCTTTAGGATTTGGGTCTAAACCTGAGATGTTGTGGAAGAACCTTAGAACCTACCGATCTGGAAGAGGGG  
CAAACACCAGTGTAAAGGCC

>SRR2298573.189435 189435 length=500

CTACATTGATAGTGGAAATCAACTGAACTGACCCTCCGGTCGCCATATCTGCAATACTCTTAATTGTCTCCATAGTGGCA  
TTGATAAAAATAAAAGGAAACCGGGGATCCCCCGGGTTTGGCCACTAGACGTTTTTTTAACCAGATCACCAGATAGAG  
GTACCTGGCCCCAGATCAGATCCATAGTGTGCTTGTACCTATGGGTACCTTCTGGGCATCCTTCGTGGGCCCTTACAAC  
TAGGGTTTGCGTACCTACCGATCTGGTAGTAGTGCAAACACTAGTTGTAAGGCCACGAAGGATGCCAGAAAGGTACCCA  
TAGGTAACAAGCGACACTATGGATCTGATCTGGGGCCAGGTACCTCTATCTTGGTGATCTGGTTAAAAAACGTCTAGTGG  
GCCAAAACCGGGGGGATCCCCGGTTTCTTTATTTTTTCAATGCCACAATGGGGACAATTAAGAGAATTGCCGATATG  
GCGACCGGGGGGGCCGTTT

>SRR2298573.183861 183861 length=500

TGCTTGTGGACCTTATGCTCACACAGCCATCCTCTAGTAAGTTTGTGAGACGTCTGGTGACGTGTGGGAACTTATTGGAA  
ACAACATTTTGTGCTGTAAAGCATCCTATTTGCCAGCGGAACAACACCTGGTAACAGGTGCCCTCTGGGGCCAAAAGCCAAGGT  
TTAACAAAACCTTTAGGATTTGGTCTAAACCTGAGATGTTGTGGAAGATACTTAGAACCTACCGATCTGGTAGTAGTGCA  
AACACTAGTGGATCCATAGTGTGCTTGTACCTATGGGTACCTTCTGGGCATCCTTCGTGGGCCCTTACAACACTAGTGT  
GCACTACTACCAGATCGGTAGGTACTAAGTATCTTCCACAACATCTCAGGTTTAGAACCAATCCTAAAGGGTTTGTAAAA  
CCTTGGCTTTTGGCCCCAGAGGCACCTGTTACCAGGTGTTGTTCCGCGGGCAATAGGAAGCTTTACCGCCAAAATGTTGGT  
TCCAATAAGTTCCCACACGC

>SRR2298573.177819 177819 length=500

GCTGTAAAGCATCCTATTTGCCAGCGGAACAACACCTGGTAACAGGTGCCCTCTGGGGCCAAAAGCCAAGGTTTAAACAAAC  
CTTTAGGATTTGGTCTAAACCTGAGATGTTGTGGAAGATACTTAGTACCTACCGATCTGGTAGTAGTGCAAACACTAGTT  
GTAAGGCCACGAAGGATGCCAGAAAGTACCCATAGGTAACAAGCGACACTATGGATCTGATCTGGGGCCAGGTACCCC  
TATCTTGGGGCAACTGAACTGACCCTCCGGCCGATATCTGCAATACTCTTAATTGTCTCCATAGTGGCATTTGATAAAA  
ATAAAAAGGAAACCGGGGATCCCCCGGGTTTGGCCACTAGACGTTTTTTTAACCAGATCACCAGATAGAGGTACCTGG  
CCCCAGATCAGATCCATAGTGTGCTTGTACCTATGGGTACCTTCTGGGCATCCTTCCTGGGCCCTTCCAACACTAGGGTTT  
GCCCCACACCCAGACCGGAG

>SRR2298573.172710 172710 length=500

GAGATGTTGTGGAAGATACTTAGTACCTACCGATCTGGTAGTAGTGCAAACACTAGTTGTAAGGCCACGAAGGATGCC  
AGAAGGTACCCATAGGTAACAAGCGACACTATGGATCTGATCTGGGGCCAGGTACCTCTATCTTGGTGATCTGGTTAAAA  
AACGTCTAGTGGGCCAAAACCGGGGGGATCCCCGGTTTCTTTTATTTTATCAATGCCACTATGGAGACAATTAAGAGT  
ATTGCAGATATTAACACTGATAGTGAATCAACTGAACTGACCCTCCGGTCGCCATATCTGCAATACTCTTAATTG  
TCTCCATAGTGGCATTGATAAAAATAAAAGGAAACCGGGGATCCCCCGGGTTTGGCCACTAGACGTTTTTTTAACCAGA  
TCACCAAGATAGAGGTACCTGGCCCCAGATCAGATCCATAGTGTGCTTGTACCTATGGGTACCTTCTGGGCATCCTTC  
GTGGGCCCTTACAACACTAGTGT

>SRR2298573.157927 157927 length=500

GAACTCATTTGGAACAACATTTTGTGCTGTAAAGCATCCTATTTGCCAGCGGAACAACACCTGGTAACAGGTGCCCTCTGGGGC  
CAAAAGCCAAGGTTTAAACAAACCTTTAGGATTTGGTCTAAACCTGAGATGTTGTGGAAGATACTTAGTACCTACCGATC  
TGGTAGTAGTGCAAACACTAGTTGTAAGGCCACGAAGGATTTCCACAAGGTACCCCTAGGTAACAAGCGACACCATGGA  
ACTGATCTGGGAAACCGGGGATCCCCCGGGTTTGGCCACTAGACGTTTTTTTAACCAGATCACCAGATAGAGGTACC  
TGGCCCCAGATCAGATCCATAGTGTGCTTGTACCTATGGGTACCTTCTGGGCATCCTTCGTGGGCCCTTACAACACTAGT  
TTTGCACACTACTACCAGATCGGTAGGTAAGTATCTTCCACAACATCTCAGGTTTAGAACCAATCCTAAAGGGATTGTT  
AAACCTTTGGCTTTTGGCCCC

>SRR2298573.152595 152595 length=500

GTTTAAACAAAACCTTTAGGATTTGGTCTAAACCTGAGATGTTGTGGAAGATACTTAGTACCTACCGATCTGGTAGTAGTG  
CAAACACTAGTTGTAAGGCCACGAAGGATGCCAGAAAGGTACCCATAGGTAACAAGCGACACTATGGATCTGATCTGGG  
GCCAGGTACCTCTATCTTGGTGATCTGGTTAAAAAACGTCTAGTGGGCCAAAACCGGGGGGATCCCCGGTTTCTTTTA  
TTTTTTCATGCTGCAATACTCTTAATTGTCTCCATAGTGGCATTGATAAAAATAAAAGGAAACCGGGGATCCCCCGGGT  
TTGGCCACTAGACGTTTTTTTAACCAGATCACCACGATAGAGGTACCTGGCCCCAGATCAGATCCATAGTGTGCTTGT  
ACCTATGGGAACCTTCTGGGCATCCTTCGTGGGCCCTTCCAACACTAGGTTTGTGCACACTCCAGATCGGTAGGGACAAATA  
ATTTTACCAACATCACAGG

>SRR2298573.149650 149650 length=500

CCTCTAGTAAGTTTGTGAGACGTCTGGTGACGTGTGGGAACTTATTGGAAACAACATTTTGTGCTGTAAAGCATCCTATTGC  
CAGCGGAACAACACCTGGTAACAGGTGCCCTCTGGGGCCAAAAGCCAAGGTTTAAACAAAACCTTTAGGATTTGGTCTAAAC  
CTGAGATGTTGTGGAAGATACTTAGTACCTACCGATCTGGTAGTAGTGCAAACACAAGTTGTAAGGCCACGAAGGATGC  
CCAGAAGGCGCCTTCTGGGCATCCTTCGTGGGCCCTTACAACACTAGTGTGTGCACTACTACCAGATCGGTAGGTAAGTA  
TCTTCCACAACATCTCAGGTTTAGAACCAATCCTAAAGGGTTTGTAAACCTTTGGCTTTTGTCCCCAGAGGCACCTGTTA

CCAGGGGTTGTTCCGCTGGCAATAGGATGCTTTACAGCAAAATGTTGTTTCCAATAAGTTCCCACACGGCCCCAGCAGGC  
TCACAAACTTACTACAGGTG  
>SRR2298573.118202 118202 length=500  
AATAAAAGGAAACCGGGGATCCCCCGGGTTTTGGCCCACTAGACGTTTTTTAACCAGATCACCAAGATAGAGGTACCTG  
GCCCCAGATCAGATCCATAGTGTGCTTGTACCTATGGGTACCTTCTGGGCATCCTTCGTGGGCCTTACAACCTAGTGT  
TGCACTACTACCAGATCGGTAGGTACTAAGTATCTTCCACAACATCTCAGGTTTGAACCAATCCTAAAGGGTTTTGTTAA  
ACCTTGGCCGCAAGGTTTAAACAAACCTTTAGGATTGGTTCTAAACCTGAGATGTTGTGGAAGATACTTAGTACCTAC  
CGATCTGGTAGTAGTGCAAACTAGTTGTAAGGCCACGAAGGATGCCAGAAAGGTACCCATAGGTAACAAGCGACACT  
ATGGATCTGATCTGGGGCCAGGAACCTCTATCTTGGTGATCTGGTTAAAAAACGGCTAGTGGGCCAAACCCGGGGGGAT  
CCCCGGTTTTCTTTTATTTCG  
>SRR2298573.114854 114854 length=500  
CCTCTGGGGCCAAAAGCCAAGGTTTAAACAAACCTTTAGGATTGGTTCTAAACCTGAGATGTTGTGGAAGATACTTAGTA  
CCTACCGATCTGGTAGTAGTGCAAACTAGTTGTAAGGCCACGAAGGATGCCAGAAAGGTACCCATAGGTAACAAGCG  
ACACTATGGATCTGATCTGGGGCCAGGAACCTCTATCTTGGTGATCTGGTTAAAAAACGTTAGTGGGCCAAACCCGGGG  
GGGATCCCCGGTTGGTGTGTTAACAGTTGTGGCTGCCTGTACTACATCTTTGTTCTCTGGTTCAGCTGTGTAGCATA  
GCAATTTGGTCCGAGCACATTAGAAGCATCATCTGAAACTTTGGTTAATAAATTAACCTCAATTTCAATTACCTACATTTT  
CCACTCTCTCATTAACCTACATTGATAGTGAATCAACTGAACTGACCCTCCGGTCGCCAAACCTGCAAAACTCTTAAT  
GTTTCCAAAGTGGCATTGTA  
>SRR2298573.102835 102835 length=500  
GATAGAGGTACCTGGCCCCAGATCAGATCCATAGTGTGCTTGTACCTATGGGTACCTTCTGGGCATCCTTCGTGGGCC  
TTACAACCTAGTGTGTTGCACTACTACCAGATCGGTAGGTACTAAGTATCTTCCACAACATCTCAGGTTTGAACCAATCCT  
AAAGGGTTTTGTTAAACCTTTGGCTTTTGGCCCCAGAGGCACCTGTTACCAGGTGTTGTTCCGCTGGCAATAGGAGGCTTTC  
AGGCAAAATGTACCATGCTTGTGGACCTTATGCTCACACAGCCATCCTCTAGTAAGTTTTGTGAGACGTTCTGGTGACGTGT  
GGAACTTATTGGAACAACATTTTGTGTAAAGCATCCTATTGCCAGCGGAAAAACACCTGGTAACAGGTGCCTCTGGG  
GCCAAAAGCCAAGGTTTAAACAAACCTTTAGGATTGGTTCTAAACCCGGGATGTTGGGAAGATACTTAGTACCTACCGC  
TCTGGTAGAAGGGCAAAACAC  
>SRR2298573.93590 93590 length=500  
CTCATTAACCTACATTGATAGTGAATCAACTGAACTGACCCTCCGGTCGCCATATCTGCAATACTCTTAATTTGTCTCCA  
TAGTGGCATTGATAAAAAATAAAAGGAAAACCGGGGATCCCCCGGGTTTTGGCCCACTAGACGTTTTTTAACCAGATCACCA  
AGATAGAGGTACCTGGCCCCAGATCAGATCCATAGTGTGCTTGTACCTATGGGTACCTTCTGGGCATCCTTCGTGGGC  
CTTACAACCTATCTTATTTGCCAGCGGAACAACACCTGGTAACAGGTGCCTCTGGGGCCAAAAGCCAAGGTTTAAACAAACCC  
TTTAGGATTGGTTCTAAACCTGAGATGTTGTGGAAGATACTTAGTACCTACCGATCTGGTAGTAGTGCAAACTAGTTG  
TAAGGCCACGAAGGATGCCAGAAAGGTACCCATAGGTAACAAGCGACACTATGGATCTGATCTTGGGCCAGGTACCTCA  
ATCTTGGTGATCTGGTTAAA  
>SRR2298573.88750 88750 length=500  
TTTTTTAACCAGATCACCAAGATAGAGGTACCTGGCCCCAGATCAGATCCATAGTGTGCTTGTACCTATGGGTACCTT  
CTGGGCATCCTTCGTGGGCCTTACAACCTAGTGTGTTGCACTACTACCAGATCGGTAGGTACTAAGTATCTTCCACAACATC  
TCAGGTTTGAACCAATCCTAAAGGGTTTTGTTAAACCTTTGGCTTTTGGCCCCAGAGGCACCTGTTACCAGGGGTTGTTC  
GCTGGCCATGGTGTGTTGTGAGACGTTCTGGTGACGTGTGGGAACTTATTGGAAAACAACATTTTGTGTAAGCATCCTATT  
GCCAGCGGAACAACACCTGGTAACAGGTGCCTCTGGGGCCAAAAGCCAAGGTTTAAACAAACCTTTAGGATTGGTTCTAA  
ACCTGAGATGTTGTGGAAGATACTTAGTACCTACCGATCTGGTAGTAGTGCAAACTAGTTGTAAGGCCACGAAGGAT  
GCCCGAAGGTACCCATAGG  
>SRR2298573.49509 49509 length=500  
CTCTATTAGTGAGATAACCATGCTTGTGGACCTTATGCTCACACAGCCATCCTCTAGTAAGTTTTGTGAGACGTTCTGGTGAC  
GTGTGGGAACTTATTGGAACAACATTTTGTGTAAGCATCCTATTGCCAGCGGAACAACACCTGGTAACAGGTGCTTC  
TGGGGCCAAAAGCCAAGGTTTAAACAAACCTTTAGGATTGGTTCTAAACCTGAGATGTTGTGGAAGATACTTAGTACCTA  
CCGATCTGGGGCCCTTACAACCTAGTGTGTTGCACTACTACCAGATCGGTAGGTACTAAGTATCTTCCACAACATCTCAGGT  
TTAGAACCAATCCTAAAGGGTTTTGTTAAACCTTTGGCTTTTGGCCCCAGAAAGCACCTGTTACCAGGTGTTGTTCCGCTGGC  
AATAGGATGCTTTACAGCAAAATGTTGTTTCCAATAAGTTCCCACACGTCACCAGACGTTCTCAAAACTTACTAGAGGAT  
GGCTGTGTGAGCCTAAGGTC  
>SRR2298573.42648 42648 length=500  
TCTTAATTTGCTCCATAGTGGCATTGATAAAAATAAAAGGAAACCGGGGATCCCCCGGGTTTTGGCCCACTAGACGTTTT  
TTAACCAGATCACCAAGATAGAGGTACCTGGCCCCAGATCAGATCCATAGTGTGCTTGTACCTATGGGTACCTTCTGG  
GCATCCTTCGTGGGCCTTACAACCTAGGGTTTTGCACTACTACCAATCGGTAGGAACTAAGAACCTTCCACAACATCCAG  
GTTTGAACACCTCTAGTAAGTTTGTGAGACGTTCTGGTGACGTGTGGGAACTTATTGGAAAACAACATTTTGTGTAAGC  
ATCCTATTGCCAGCGGAACAACACCTGGTAACAGGTGCCTCTGGGGCCAAAAGCCAAGGTTTAAACAAACCTTTAGGATT  
GGTTCTAAACCTGAGATGTTGTGGAAGATACTTAGTACCTACCGATCTGGTAGTAGTGCAAACTAGTTGTAAGGCCCA  
CCAAGGATGCCAGAAAGGGC  
>SRR2298573.33453 33453 length=500

GGTTTAAACAAACCCTTTAGGATTGGTTCTAAACCTGAGATGTTGTGGAAAGATACTTAGTACCTACCGATCTGGTAGTAGT  
GCAAAACACTAGTTGTAAGGCCACGAAGGATGCCAGAAAGGTACCCATAGGTAACAAGCGACACTATGGATCTGATCTGG  
GGCCAGGTACCTCTATCTTGGTGATCTGGTTAAAAAACGTTCTAGTGGGCCAAACCCGGGGGGGATCCCCGGTTTCCTTTT  
ATTTTTTCAATACATTGATAGTGGAAATCAACTGAACTGACCACTCCGGTTCGCCATATCTGCAATACTCTTAATTGTCTCC  
ATAGTGGCATTGATAAAATAAAAGGAAACCGGGGATCCCCCGGGTTTGGCCCACTAGACGTTTTTTTAAACCAGATCACC  
AAGATAGAGGTACCTGGCCCCAGATCAGATCCATAGTGTCTGCTTGTACCTATGGGAACCTTCTGGGCAACCTTCTTGGG  
CCTTACAACCTAGGGTTTGGC

>SRR2298573.26749 26749 length=500

TTTTTAAACCAGATCACCAAGATAGAGGTACCTGGCCCCAGATCAGATCCATAGTGTCTGCTTGTACCTATGGGTACCTTC  
TGGGCATCCTTCGTGGGCCCTTACAACCTAGTGTTTGCACTACTACCAGATCGGTAGGTACTAAGTATCTTCCACAACATCT  
CAGGTTTLAGAACCAATCCTAAAGGGTTTGTAAACCTTGGCTTTTGGCCCCAGAGGCACCTGTTACCAGGGGTGGTTCCG  
CTGGCAATAGGCTGTAAAGCATCCTATTTGCCAGCGGAACAACACCTGGTAACAGGTGCCTCTGGGGCCAAAAAGCCAAGGT  
TTAACAAACCCTTTAGGATTGGTTCTAAACCTGAGATGTTGTGGAAAGATACTTAGTACCTACCAGATCTGGTAGTAGTGCA  
AACACTAGTTGTAAGGCCACGAAGGATGCCAGAAAGGAACCCATAGGAAACAACGGACCAATGGATCTGACCTGGGGC  
CAGGTCCCTCTATCTTGGGG

>SRR2298573.26144 26144 length=500

AGGTTTAAACAAACCCTTTAGGATTGGTTCTAAACCTGAGATGTTGTGGAAAGATACTTAGTACCTACCAGATCTGGTAGTAG  
TGCAAAACACTAGTTGTAAGGCCACGAAGGATGCCAGAAAGGTACCCATAGGTAACAAGCGACACTATGGATCTGATCTG  
GGGCCAGGTACCTCTATCTTGGTGATCTGGTTAAAAAACGTTCTAGTGGGCCAAACCCGGGGGGGACCCCCGGTTTCCTTTT  
TATTTTTTACCATAGTAGCATTGATAAAATAAAAGGAAACCGGGGATCCCCCGGGTTTGGCCCACTAGACGTTTTTTT  
AACCAGATCACCAAGATAGAGGTACCTGGCCCCAGATCAGATCCATAGTGTCTGCTTGTACCTATGGGTACCTTCTGGGC  
ATCCTTCGTGGGCCTTACAACCTAGTGTTCGCACTACTACCAGATCGGTAGGTACTAAGAATCTTCCACAACATCTCAGGT  
TTAGAACCAATCCTAAAGGG

>SRR2298546.979245 979245 length=502

CCCTAGGATTTTGGAAAGTCCAATTGCAATAAGCTACCCAATATGGTAACATCAACTTGTGTAGCAGAACCTGAAGGTATG  
GATAAAGGTGTCCAAACATAGACTTTTAGTTGCCCTAAGTCTGACGAATCTGTTTTAACATAGTTTGTGTGTCAGCAACATA  
GGGGATACATAAAATCAGCCTGTGTGGTCTCAGCCAAAATTCATCAACACATGTGGTAAATTTGGTAAACGCTCCAAAATCTTA  
ACTTTGAGTCAGCCTATGGCCAATCAAGATACTTTGCAGCAGTACGGTGTGGTTTTTCATTTTTCAAGTACAAGTGAATGTT  
AATCAAGGAACAGCCGGTAGTGCATTGGTGGTGTATGAACCCAAAACCTGTTGTGACATATGACTCAAAGTTAGAATTTGG  
AGCGTTTACCAATTTACCACATGTGTTGATGAATTTGGCTGAGACCACACAGGCTGATTTATGTATCCCCTATGTTGCTG  
ACACAAACTATGTTAAAAACAGA

>SRR2298546.941759 941759 length=502

CCCTAGGATTTTGGAAAGTCCAATTGCAATAAGCTACCCAATATGGTAACATCAACTTGTGTAGCAGAACCTGAAGGTATG  
GATAAAGGTGTCCAAACATAGACTTTTAGTTGCCCTAAGTCTGACGAATCTGTTTTAACATAGTTTGTGTGTCAGCAACATA  
GGGGATACATAAAATCAGCCTGTGTGGTCTCAGCCAAAATTCATCAACACATGTGGTAAATTTGGTAAACGCTCCAAAATCTTA  
ACTTTGAGTCAACACCAACATGGGCTAGAGGACATCAGATAACCCATGTGGAACTACCAAAAAGTCTTTTGGGACAAAAAC  
AGCAAGCCAGCCTATGGCCAATCAAGATACTTTGCAGCAGTACGGTGTGGTTTTTCATTTTTCAAGTACAAGTGAATGTTAA  
TCAAGGAACAGCCGGTAGTGCATTGGTGGTGTATGAACCCAAAACCTGTTGTGACATATGACTCAAAGTTAGAATTTGGAG  
CGTTTACCAATTTACCACATGT

>SRR2298546.911773 911773 length=501

GGAGACACATGAGTGGACACCAACCTGGGCTAGAGGACATCAGATAACCCATGTGGAACTACCAAAAAGTCTTTTGGGACA  
AAAACAGCAAACAGCCTATGGCCAATCAAGATACTTTGCAGCAGTACAGTGTGGTTTTTCATTTTTCAAGTACAAGTGAAT  
GTTAATCAAGGAACAGCCGGTAGTGCATTGGTGGTGTATGAACCCAAAACCTGTTGTGACATATGACTCAAAGTTAGAATTT  
TGGAGCGTTTTAAAGCTACCCAATATGGTAACATCAACTTGTGTAGCAGAACCTGAAGGTATGGATAAAGGTGTCCAAAACA  
TAGACTTTTTAGTTGCCCTAAGTCTGACGAATCTGTTTTAACATAGTTTGTGTGTCAGCAACATAGGGGATACATAAAATCAGC  
CTGTGTGGTCTCAGCCAAAATTCATCAACACATGTGGTAAATTTGGTAAACGCTCCAAAATCTTAACTTTGAGTCATATGTCA  
CAACAGGTTTGGGTTTCATACA

>SRR2298546.849756 849756 length=502

ACCAAAACCTGTTGTGACATATGACTCAAAGTTAGAATTTGGAGCGTTTACCAATTTACCACATGTGTTGATGAATTTGG  
CTGAGACCACACAGGCTGATTTATGTATCCCCTATGTTGCTGACACAAAACCTATGTTAAAACAGATTTCGTGAGACTTAGGG  
CAACTAAAAGTCTATGTTTGGACACCTTTATCCATACCTTCAGGTTCTGCTACACAAGTTGATGTTACCATATTTGGGTAG  
CTTATTGCAATGTTGTGGAGTCACTCATTACAGAAAAAAGTTGAGATATTTTTACTAAATCATCAAACCTACTCTTGCTT  
CCTGCTGTTCTTGGGTCATAGAATGCCCTTTCTCCAACCAAAAGCAATGATTGCGCTGCAGTGGTACTCAATACGTTTCGC  
CATGTTTCATAGAACCTGGCCCTTCTGCAATGTCAATTTTTCCCTGGTCCACTTGTATTTAGTGTCTCATTGTAAGAATTT  
TCTTAAGATTTTGCTTCCGCGT

>SRR2298546.846523 846523 length=502

CGTCTTGACCGAATACCTTAGGATTTTGGAAAGTCCAATTGCAATAAGCTACCCAATATGGTAACATCAACTTGTGTAGCA  
GAACCTGAAGGTATGGATAAAGGTGTCCAAACATAGACTTTTAGTTGCCCTAAGTCTGACGAATCTGTTTTAACATAGTT  
TGTGTGACGAACATAGGGGATACATAAAATCAGCCTGTGTGGTCTCAGCCAAAATTCATCAACACATGTGGTAAATTTGGTAA

ACGCTCCAAATGTGTATGAACCCAAACCTGTTGTGACATATGACTCAAAGTTAGAATTTGGAGCGTTTACCAATTTACCA  
CATGTGTTGATGAATTTGGCTGAGACCACACAGGCTGATTTATGTATCCCCATATGTTGCTGACACAAACTATGTTAAAAAC  
AGATTCGTCAGACTTAGGGCAACTAAAAAGTCTATGTTTGGACACCTTTATCCATACCTTCAGGTTCTGCTACACAAGTTG  
ATGTTACCATATTTGGGTAGCTT

>SRR2298546.819295 819295 length=502

GGATTTTGGAAAGTCCAATTGCAATAAGCTACCCAATATGGTAACATCAACTTGTGTAGCAGAACCTGAAGGTATGGATAA  
AGGTGTCCAAACATAGACTTTTAGTTGCCCTAAGTCTGACGAATCTGTTTTAACATAGTTTGTGTGACCAACATAGGGGA  
TACATAAAATCAGCCTGTGTGGTCTCAGCCAAATTCATCAACACATGTGGTAAATTTGGTAAACGCTCCAAATTCCTAACTTT  
GAGTCATATGTAGCCAGCCTATGGCCAATCAAGATACTTTGCGAGCAGTACGGTGTGGTTTTTCATTTTTCAAGTACAAGTGA  
ATGTTAATCAAGGAACAGCCGGTAGTGCATTGGTGGTGTATGAACCCAAACCTGTTGTGACATATGACTCAAAGTTAGAA  
TTTGGAGCGTTTACCAATTTACCACATGTGTTGATGAATTTGGCTGAGACCACACAGGCTGATTTATGTATCCCCATATGT  
TGCTGACACAAACTATGTTAAA

>SRR2298546.805273 805273 length=501

GTATGAACCCAAACCTGTTGTGACATATGACTCAAAGTTAGAATTTGGAGCGTTTACCAATTTACCACATGTGTTGATGA  
ATTTGGCTGAGACCACACAGGCTGATTTATGTATCCCCATATGTTGCTGACACAAACTATGTTAAAACAGATTCGTCAGAC  
TTAGGGCAACTAAAAGTCTATGTTTGGACACCTTTATCCATACCTTCAGGTTCTGCTACACAAGTTGATGTTACCATATT  
GGTAGCTTATGTTCCCTGGGTCATAGAATGCCCTTTCTCCAACCAAAGCAATGATTGCGCTACAGTGGTACTCAATACG  
TTCGCCATGTTTATAGAACCTGGCCCTTCTGCAATGTCAATTTTTTCCCCTAGTCCACTTGTATTTAGTGCTCATTTGTAAG  
AATTTTCTTAAAGATTTTGTCTCCGCGTTGGTGCATTTGTCATAAAATACCAACGCTCTTGACCGAATACCCTAGGATTTTGG  
AGTCCAATTGCAATAAGCTAC

>SRR2298546.803604 803604 length=502

CATAAATACCAACGCTTTGACCGAATACCCTAGGATTTTGGAAAGTCCAATTGCAATAAGCTACCCAATATGGTAACATCA  
ACTTGTGTAGCAGAACCTGAAGGTATGGATAAAGGTGTCCAAACATAGACTTTTAGTTGCCCTAAGTCTGACGAATCTGT  
TTAACATAGTTTGTGTGACCAACATAGGGGATACATAAAATCAGCCTGTGTGGTCTCAGCCAAATTCATCAACACATGTG  
GTAATTTGGTAGTTGTGACATATGACTCAAAGTTAGAATTTGGAGCGTTTACCAATTTACCACATGTGTTGATGAATTTG  
GCTGAGACCACACAGGCTGATTTATGTATCCCCATATGTTGCTGACACAAACTATGTTAAAACAGATTCGTCAGACTTAGG  
GCAACTAAAAGTCTATGTTTGGACACCTTTATCCATACCTTCAGGTTCTGCTACACAAGTTGATGTTACCATATTGGGTA  
GCTTATTGCAATTGGACTTCCA

>SRR2298546.778923 778923 length=502

CCCTAGGATTTTGGAAAGTCCAATTGCAATAAGCTACCCAATATGGTAACATCAACTTGTGTAGCAGAACCTGAAGGTATG  
GATAAAGGTGTCCAAACATAGACTTTTAGTTGCCCTAAGTCTGACGAATCTGTTTTAACATAGTTTGTGTGACCAACATA  
GGGGATACATAAAATCAGCCTGTGTGGTCTCAGCCAAATTCATCAACACATGTGGTAAATTTGGTAAACGCTCCAAATTTCTA  
ACTTTGAGTCAATGCCCTTCACTCCTGATTTCTCCAATGTTGACACATTCCTCAATGGCATATGATATCACCCTGGG  
GAGAAAGATCCTAGCAAATTTGGTTAGATTGGAGACACATGAGTGGACACCAACCTGGGCTAGAGGACATCAGATAACCCA  
TGTGGAACCTACCAAAGTCTTTTGGGACAAAAACAGCAAGCCAGCCTATGGCCAATCAAGATACTTTGCAGCAGTACGGT  
GTGGTTTTCATTTTTCAAGTACA

>SRR2298546.752878 752878 length=496

ACCTGAAGGTATGGATAAAGGTGTCCAAACATAGACTTTTAGTTGCCCTAAGTCTGACGAATCTGTTTTAACATAGTTTG  
TGTCAGCAACATAGGGGATACATAAAATCAGCCTGTGTGGTCTCAGCCAAATTCATCAACACATGTGGTAAATTTGGTAAAC  
GCTCCAAATTCCTAACTTTGAGTCATATGTCACAACAGGTTTGGGTTTATACACCACCAATGCACTACCGGCTGTTCCCTTG  
ATTAACATATGTTAATCAAGGAACAGCCGGTAGTGCATTGGTGGTGTATGAACCCAAACCTGTTGTGACATATGACTCAA  
AGTTAGAATTTGGAGCGTTTACCAATTTACCACATGTGTTGATGAATTTGGCTGAGACCACACAGGCTGATTTATGTATC  
CCCTATGTTGCTGACACAAACTATGTTAAAACAGATTCGTCAGACTTAGGGCAACTAAAAGTCTATGTTTGGACACCTTT  
ATCCATACCTTCAGGT

>SRR2298546.712941 712941 length=501

ATGTTGACACATTTCCACTCAATGGCATATGATATCACCCTGGGGAGAAAAATCCTAGCAAATTTGGTTAGATTGGAGACA  
CATGAGAGGACACCAACCTGGGCTAGAGGACATCAGATAACCCATGTGGAACCTACCAAAAAGTCTTTTGGGACAAAAACAG  
CAAGCCAGCCTATGGCCAATCAAGATACTTTGCAGCAGTACGGTGTGGTTTTTCATTTTTCAAGTACAAGTGAATGTTAATC  
AAGGAACAGCACCCAATATGGTAACATCAACTTGTGTAGCAGAACCTGAAGGTATGGATAAAGGTGTCCAAACATAGACT  
TTTAGTTGCCCTAAGTCTGACGAATCTGTTTTAACATAGTTTGTGTGACCAACATAGTTGGATACATAAAATCAGCCTGTGT  
GGTCTCAGCCAAATTCATCAACACATGTGGTAAATTTGGTAAACGCTCCAAATTTCTAACTTTGAGTCATATGTCACAACAG  
GTTTGGGTTTATACACCACCA

>SRR2298546.706137 706137 length=502

GCAATAAGCTACCCAATATGGTAACATCAACTTGTGTAGCAGAACCTGAAGGTATGGATAAAGGTGTCCAAACATAGACT  
TTTAGTTGCCCTAAGTCTGACGAATCTGTTTTAACATAGTTTGTGTGACCAACATAGGGGATACATAAAATCAGCCTGTGT  
GGTCTCAGCCAAATTCATCAACACATGTGGTAAATTTGGTAAACGCTCCAAATTTCTAACTTTGAGTCATATGTCACAACAG  
GTTTGGGTTTCAAGATGAACCCAAACCTGTTGTGACATATGACTCAAAGTTAGAATTTGGAGCGTTTACCAATTTACCACA  
TGTGTTGATGAATTTGGCTGAGACCACACAGGCTGATTTATGTATCCCCATATGTTGCTGACACAAACTATGTTAAAACAG  
ATTCGTCAGACTTAGGGCAACTAAAAGTCTATGTTTGGACACCTTTATCCATACCTTCAGGTTCTGCTACACAAGTTGAT

GTTACCATATTGGGTAGCTTAT  
>SRR2298546.688397 688397 length=502  
GCATTCGTGGTGTATGAACCCAAACCTGTTGTGACATATGACTCAAAGTTAGAATTTGGAGCGTTTACCAATTTACCACA  
TGTGTTGATGAATTTGGCTGAGACCACACAGGCTGATTTATGTATCCCTATGTTGCTGACACAACTATGTTAAAACAG  
ATTCGTCAGACTTAGGGCAACTAAAAGTCTATGTTTGGACACCTTTATCCATACCTTCAGGTTCTGCTACACAAGTTGAT  
GTTACCATATTTCTTAAGATTTTGTCTCCGCGTTGGTGCATTGTCATAAAATACCAACGCTTTGACCGAATACCCTAGGAT  
TTTGGAAAGTCCAATTGCAATAAGCTACCCAATATGGTAACATCAACTTGTGTAGCAGAACCTGAAGGTATGGATAAAGGT  
GTCCAAACATAGACTTTTAGTTGCCCTAAGTCTGACGAATCTGTTTAAACATAGTTTGTGTACGCAACATAGGGGATACA  
TAAATCAGCCTGTGTGGTCTCA  
>SRR2298546.643330 643330 length=502  
GCTGTAAGCATCCTATTGCCAGCGGAACAACACCTGGTAACAGGTGCCCTCTGGGGCCAAAAGCCAAGGTTTAAACAAACC  
CTTTAGGATTGGTTATAAACCTGAGGTGTTGTGGAAGATACTTAGTACCTACCGATCTGGTAGTAGTGCAAAACACTAGTT  
GTAAGGCCACGAAGGATGCCAGAAAGGTACCCATAGGTAACAAGTGACACTATGGATCTGATTTGGGGCCAGGTACCTC  
TATCTTGGTGATAACAATTTGGTCCGAGCACATTAGAAGCATCATCTGCAACTTTAGTTAATAAACTACCTCCAATTTCA  
TTACCTACATTTTCCACTCTCTCATTAAGTGCATTGATAGTGAATCAACTGAACTGACCCTCCGGTTGCCATATCTGC  
AATACTCTTAATTGTCTCCATAATGGCATTGATAAAAATAAAAGGAAACCGGGGATCCCCCGGGTTTGGCCACTAGAC  
GTTTTTTAACCAGATCAACAAA  
>SRR2298546.582071 582071 length=502  
ACTCAATACGTTTCGCCATGTTTCATAGAACCTGGCCCTTCTGCAATGTCAATTTTTTCCCCTAGTCCACTTGTATTTAGTGC  
TCATTTGTAAGAATTTTCTTAAGATTTTGTCTCCGCGTTGGTGCATTGTCATAAAATACCAACGCTTTGACCGAATACCCTA  
GGATTTTGGAAAGTCCAATTGCAATAAGCTACCCAATATGGTAACATCAACTTGTGTAGCAGAACCTGAAGGTATGGATAA  
AGGTGTCCAAAAGTTGTGACATATGACTCAAAGTTAGAATTTGGAGCGTTTACCAATTTACCACATGTGTTGATGAATTTG  
GCTGAGACCACACAGGCTGATTTATGTATCCCTATGTTGCTGACACAACTATGTTAAAACAGATTCGTCAGACTTAGG  
GCAACTAAAAGTCTATGTTTGGACACCTTTATCCATACCTTCAGGTTCTGCTACACAAGTTGATGTTACCATATTTGGGTA  
GCTTATTGCAATTGGACTTCCA  
>SRR2298546.569833 569833 length=502  
AGGATTTTGGAAAGTCCAATTGCAATAAGCTACCCAATATGGTAACATCAACTTGTGTAGCAGAACCTGAAGGTATGGATA  
AAGGTGTCCAAACATAGACTTTTAGTTGCCCTAAGTCTGACGAATCTGTTTAAACATAGTTTGTGTACGCAACATAGGGG  
ATACATAAAATCAGCCTGTGTGGTCTCAGCCAAAATTCATCAACACATGTGGTAAATTTGGTAAACGCTCCAAAATTTCTAACTT  
TGAGTCATATGATGTGGAACCTACCAAAAAGTCTTTTGGGACAAAAACAGCAAGCCAGCCTATGGCCAATCAAGATACTTTG  
CAGCAGTACGGTGTGGTTTTTCAATTTCAAGTACAAGTGAATGTTAATCAAGGAACAGCCGGTAGTGCATTTGGTGGTGTAT  
GAACCCAAAACCTGTTGTGACATATGACTCAAAGTTAGAATTTGGAGCGTTTACCAATTTACCACATGTGTTGATGAATTT  
GGCTGAGACCACACAGGCTGAT  
>SRR2298546.536924 536924 length=502  
GGACATCAGATAACCCATGTGGAACCTACCAAAAAGTCTTTTGGGACAAAAACAGCAAGCCAGCCTATGGCCAATCAAGATA  
CTTTGCAGCAGTACGGTGTGGTTTTTCAATTTTCAAGTACAAGTGAATGTTAATCAAGGAACAGCCGGTAGTGCATTTGGTGG  
TGTATGAACCCAAACCTGTTGTGACATATGACTCAAAGTTAGAATTTGGAGCGTTTACCAATTTACCACATGTGTTGATG  
AATTTGGCTGAGTTTTTAAACATAGTTTGTGTACGCAACATAGGGGATACATAAAATCAGCCTGTGTGGTCTCAGCCAAAATTC  
ATCAACACATGTGGTAAATTTGGTAAACGCTCCAAAATTTCTAACTTTGAGTCATATGTCACAACAGGTTTGGGTTTCATACAC  
CACCAATGCACTACCGGCTGTTCCCTGATTAACATTCACCTGTACTTGAAAATGAAAACCACACCGTACTGCTGCAAAAGT  
ATCTTGATTGGCCATAGGCTGG  
>SRR2298546.496339 496339 length=500  
ATACCAACGCTTTGACCGAATACCCTAGGATTTTGGAAAGTCCAATTGCAATAAGCTACCCAATATGGTAACATCAACTTG  
TGTAGCAGAACCTGAAGGTATGGATAAAGGTGTCCAAACATAGACTTTTAGTTGCCCTAAGTCTGACGAATCTGTCTTAA  
CATAGTTTGTGTACGCAACATAGGGGATACATAAAATCAGCCTGTGTGGTCTCAGCCAAAATTCATCAACACATGTGGTAAA  
TTGGTAAACGGTAGTGCATTTGGTGGTGTATGAACCCAAACCTGTTGTGACATATGACTCAAAGTTAGAATTTGGAGCGTT  
TACCAATTTACCACATGTGTTGATGAATTTGGCTGAGACCACACAGGCTGATTTATGTATCCCTATGTTGCTGACACAA  
ACTATGTTAAGACAGATTCGTCAGACTTAGGGCAACTAAAAGTCTATGTTTGGACACCTTTATCCATACCTTCAGGTTCT  
GCTACACAAGTTGATGTTAC  
>SRR2298546.481387 481387 length=502  
ATTTTCAAGTACAAGTGAATGTTAATCAAGGAACAGCCGGTAGTGCATTTGGTGGTGTATGAACCCAAACCTGTTGTGACA  
TATGACTCAAAGTTAGAATTTGGAGCGTTTACCAATTTACCACATGTGTTGATGAATTTGGCTGAGACCACACAGGCTGA  
TTTATGTATCCCTATGTTGCTGACACAACTATGTTAAAACAGATTCGTCAGACTTAGGGCAACTAAAAGTCTATGTTT  
GGACACCTTTAGCTGAGCTCATTTGTAAGAATTTTCTTAAGATTTTGTCTCCGCGTTGGTGCATTGTCATAAAATACCAACG  
TCTTGACCGAATACCCTAGGATTTTGGAAAGTCCAATTGCAATAAGCTACCCAATATGGTAACATCAACTTGTGTAGCAGA  
ACCTGAAGGTATGGATAAAGGTGTCCAAACATAGACTTTTAGTTGCCCTAAGTCTGACGAATCTGTTTAAACATAGTTTGT  
GTACGCAACATAGGGGATACA  
>SRR2298546.446967 446967 length=502  
CACATGAGTGGACACCAACCTGGGCTAGAGGACATCAGATAACCCATGTGGAACCTACCAAAAAGTCTTTTGGGACAAAAAC

AGCAAGCCAGCCTATGGCCAATCAAGATACTTTGCAGCAGTACGGTGTGGTTTTTCATTTTCAAGTACAAGTGAATGTTAA  
TCAAGGAACAGCCGGTAGTGCATTGGTGGTGTATGAACCCAAAACCTGTTGTGACATGACTCAAAGTTAGAATTTGGAGCG  
TTTACCAATTTCCCTAGGATTTTGGAAGTCCAATTTGCAATAAGCTACCCAATATGGTAACATCAACTTGTGTAGCAGAAC  
CTGAAGGTATGGATAAAGGTGTCCAAACATAGACTTTTAGTTGCCCTAAGTCTGACGAATCTGTTTTAACATAGTTTTGTG  
TCAGCAACATAGGGGATACATAAATCAGCCTGTGTGGTCTCAGCCAAATTCATCAACACATGTGGTAAATTTGGTAAACGC  
TCCAAATTTCTAACTTTGAGTCA

>SRR2298546.422358 422358 length=502

GTGTGGTTTTTCATTTTCAAGTACAAGTGAATGTTAATCAAGGAACAGCCGGTAGTGCATTGGTGGTGTATGAACCCAAAAC  
CTGTTGTGACATATGACTCAAAGTTAGAATTTGGAGCGTTTACCAATTTACCACATGTGTTGATGAATTTGGCTGAGACC  
ACACAGGCTGATTTATGTATCCCCTATGTTGCTGACACAAAATATGTTAAAAACAGATTTCGTGACACTTAGGGCAACTAAA  
AGTCTATGTTTGGATAAAGGTGTCCAAACATAGACTTTTAGTTGCCCTAAGTCTGACGAATCTGTTTTAACATAGTTTTGT  
GTCAGCAACATAGGGGATACATAAATCAGCCTGTGTGGTCTCAGCCAAATTCATCAACACATGTGGTAAATTTGGTAAACG  
CTCCAAATTTCTAACTTTGAGTCAATATGTCACAACAGGTTTGGGTTTACACACCACCAATGCACTACCGGCTGTTCCCTGA  
TTAACATTTCACTTTGACTTTGAA

>SRR2298546.402906 402906 length=502

TTCTTATGACTACAGACTGTGGTGTGTTGTGGATGACCACGTAATAAGCTTTTGCATCTATGCCATGGTTGGCTGA  
AGGGGTTGTGGAGTCACTCATTACAGAAAAAAGTTGAGATATTTTTACTAAATCATCAAACCTACTCTTGCTTCCCTGCTG  
TTCTTGGGTCATAGAATGCCCTTTCTCCAACCAAAGCAATTTGATTGCGCTGCAGTGGTACTCAATACGTTCCGCATGTTT  
ATAGAACCTGGCCTGTTGTGACATATGACTCAAAGTTAGAATTTGGAGCGTTTACCAATTTACCACATGTGTTGATGAAT  
TTGGCTGAGACCACACAGGCTGATTTATGTATCCCCTATGTTGCTGACACAAAATATGTTAAAAACAGATTTCGTGACACTT  
AGGGCAACTAAAAGTCTATGTTTGGACACCTTTATCCATAACCTTCAGGTTCTGCTACACAAGTTGATGTTACCATATTTGG  
GTAGCTTATTGCAATTTGGACTT

>SRR2298546.351765 351765 length=501

GGCGTCCGCTGGGGGTGTATGAACCCAAAACCTGTTGTGACATATGACTCAAAGTTAGAATTTGGAGCGTTTACCAATTTA  
CCACATGTGTTGATGAATTTGGCTGAGACCACACAGGCTGATTTATGTATCCCCTATGTTGCTGACACAAAATATGTTAA  
AACAGATTTCGTGACACTTAGGGCAACTAAAAGTCTATGTTTGGACACCTTTATCCATAACCTTCAGGTTCTGCTACACAAG  
TTGATGTTACGCAATAAGCTACCCAATATGGTAACATCAACTTGTGTAGCAGAACCTGAAGGTATGGATAAAGGTGTCCA  
AACATAGACTTTTAGTTGCCCTAAGTCTGACGAATCTGTTTTAACATAGTTTTGTGTCAGCAACATAGGGGATACATAAAT  
CAGCCTGTGTGGTCTCAGCCAAATTCATCAACACATGTGGTAAATTTGGTAAACGCTCCAAATTTCTAACTTTGAGTCAAT  
GTCACAACAGGTTTGGGTTCA

>SRR2298546.348893 348893 length=501

GGTTTATAACCAATCCTAAAGGGTTTGTAAACCTTTGGCTTTTGGCCCCAGAGGCACCTGTTACCAGGTGTTGTTCCGCT  
GGCAATAGGATGCTTTACAGCAAAGTATTGTTTCCAATAAGTTCCCACACGTCACCAGACGCTCACAAAATTTACTAGAG  
GATGGCTGTGTGAGCATAAGGTTCCACAAGCATGGTATCTACTAATAAGAATTTATGGCACGCCATCTGCCACCCACACAA  
AATGTGGGTTAGAATGGTGTAAATTAACCTTTTCTAACCACATTTTGTGTGGGGTGGCAGATGGCGTGCCATAATTTCTAT  
TAGTGAGATAACCATGCTTGTGGACCTTATGCTCACACAGCCATCCTCTAGTAAGTTTGTGAGACGCTGGTGACGTTGG  
GAACTTATTGGAAACAATACTTTGCTGTAAAGCATCCTATTGCCAGCGGAACAACACCTGGTAAACAGGTGCCCTCTGGGGC  
CAAAAGCCAAGGTTTAAACAAA

>SRR2298546.338937 338937 length=502

CTGCATTTGATAGTGAATCAACTGAACTGACCCTCCGGTTGCCATATCTGCAATACTCTTAATTTGTCTCCATAATGGCA  
TTGATAAAAATAAAGGAAACCGGGGATCCCCCGGGTTTGGCCACTAGACGTTTTTTTAAACCAGATCACCAGATAGAG  
GTACCTGGCCCCAAATCAGATCCATAGTGTCACTTGTACCTATGGGTACCTTCTGGGCATCCTTCGTGGGCTTACAAC  
TAGTGTTTGCACCTATTGCCAGCGGAACAACACCTGGTAAACAGGTGCCCTCTGGGGCCAAAAGCCAAGGTTTAAACAAACC  
TTTAGGATTGGTTATAAAACCTGAGGTGTTGTGGAAGATACTTAGTACCTACCGATCTGGTAGTAGTGCAAAACACTAGTTG  
TAAGGCCACGAAGGATGCCAGAGGTACCCATAGGTAACAAGTGCACACTATGGATCTGATTTGGGGCCAGGTACCTCT  
ATCTTGGTGATCTGGTTAAAAA

>SRR2298546.309495 309495 length=502

CATAAATACCAACGCTCTTGACCGAATACCCTAGGATTTTGGAAGTCCAATTTGCAATAAGCTACCCAATATGGTAAACATCA  
ACTTGTGTAGCAGAACCTGAAGGTATGGATAAAGGTGTCCAAACATAGACTTTTAGTTGCCCTAAGTCTGACGAATCTGT  
TTTAAACATAGTTTTGTGTGACCAACATAGGGGATACATAAATCAGCCTGTGTGGTCTCAGCCAAATTCATCAACACATGTG  
GTAATTTGGTAGTGACATATGACTCAAAGTTAGAATTTGGAGCGTTTACCAATTTACCACATGTGTTGATGAATTTGGCT  
GAGACCACACAGGCTGATTTATGTATCCCCTATGTTGCTGACACAAAATATGTTAAAAACAGATTTCGTGACACTTAGGGCA  
ACTAAAAGTCTATGTTTGGACACCTTTATCCATAACCTTCAGGTTCTGCTACACAAGTTGATGTTACCATATTTGGTGTAGCT  
TATTGCAATTTGACTTTCCAAAA

>SRR2298546.282928 282928 length=502

CAATATGGTAAACATCAACTTGTGTAGCAGAACCTGAAGGTATGGATAAAGGTGTCCAAACATAGACTTTTAGTTGCCCTA  
AGTCTGACGAATCTGTTTTAACATAGTTTTGTGTGACCAACATAGGGGATACATAAATCAGCCTGTGTGGTCTCAGCCAAA  
TTCATCAACACATGTGGTAAATTTGGTAAACGCTCCAAATTTCTAACTTTGAGTCAATATGTCACAACAGGTTTGGGTTTATA  
CACCACCACAGCTGTGGTGGTGTATGAACCCAAAACCTGTTGTGACATATGACTCAAAGTTAGAATTTGGAGCGTTTACCA

ATTTACCACATGTGTTGATGAATTTGGCTGAGACCACACAGGCTGATTTATGTATCCCCTATGTTGCTGACACAAACTAT  
GTTAAAAACAGATTCGTCAGACTTAGGGCAACTAAAAAGTCTATGTTTGGACACCTTTATCCATACCTTCAGGTTCTGCTAC  
ACAAGTTGATGTTACCATATTG

>SRR2298546.268982 268982 length=502

TGTATGAACCCAAACCTGTTGTGACATATGACTCAAAGTTAGAATTTGGAGCGTTTACCAATTTACCACATGTGTTGATG  
AATTTGGCTGAGACCACACAGGCTGATTTATGTATCCCCTATGTTGCTGACACAAACTATGTTAAAAACAGATTCGTCAGA  
CTTAGGGCAACTAAAAGTCTATGTTTGGACACCTTTATCCATACCTTCAGGTTCTGCTACACAAGTTGATGTTACCATAT  
TGGGTAGCTTAGTCATAAAATACCAACGCTTTGACCGAATACCTTAGGATTTTGGAAAGTCCAATGCAATAAGCTACCCAA  
TATGGTAACATCAACTTGTGTAGCAGAACCTGAAGGTATGGATAAAAGGTGTCCAAACATAGACTTTTAGTTGCCCTAAGT  
CTGACGAATCTGTTTTAACATAGTTTGTGTGTCAGCAACATAGGGGATACATAAAATCAGCCTGTGTGGTCTCAGCCAAATTC  
ATCAACACATGTGGTAAATTGG

>SRR2298546.262246 262246 length=502

GTGCATTGGTGGTGTATGAACCCAAACCTGTTGTGACATATGACTCAAAGTTAGAATTTGGAGCGTTTACCAATTTACCA  
CATGTGTTGATGAATTTGGCCGAGACCACACAGGCTGATTTATGTATCCCCTATGTTGCTGACACAAACTATGTTAAAAAC  
AGATTCGTCAGACTTAGGGCAACTAAAAGTCTATGTTTGGACACCTTTATCCATACCTTCAGGTTCTGCTACACAAGTTG  
ATGTTACCATAAAACCAAGCAATTGATTGCGCTGCAGTGGTACTCAATACGTTTCGCCATGTTATAGAACCTGGCCCTTC  
TGCAATGTCAATTTTTCCCCTAGTCCACTTGTATTTAGTGTCTATGTAAGAATTTTCTTAAGATTTTGGCTCCGCGTTG  
GTGCATTGTCTATAAATACCAACGCTTTGACCGAATACCTTAGGATTTTGGAAAGTCCAATGCAATAAGCTACCCAAATATG  
GTAACATCAACTTGTGTAGCAA

>SRR2298546.262148 262148 length=500

GGCCAATCAAGATACTTTGCAGCAGTACGGTGTGGTTTTTCATTTTTCAAGTACAAGTGAATGTTAATCAAGGAACAGCCGG  
TAGTGCATTGGTGGTGTATGAACCCAAACCTGTTGTGACATATGACTCAAAGTTAGAATTTGGAGCGTTTACCAATTTAC  
CACATGTGTTGATGAATTTGGCTGAGACCACACAGGCTGATTTATGTATCCCCTATGTTGCTGACACAAACTATGTTAAA  
ACAGATTCGTTGGTATGGATAAAAGGTGTCCAAACATAGACTTTTAGTTGCCCTAAGTCTGACGAATCTGTTTTAACATAGT  
TTGTGTGACCAACATAGGGGATACATAAAATCAGCCTGTGTGGTCTCAGCCAAATTCATCAACACATGTGGTAAATTTGGTA  
AACGCTCCAAATTTCTAACTTTGAGTCATATGTCACAACAGGTTTGGGTTTCATACACCACCAATGCACTACCGGCTGTTC  
TTGATTAACATTTCACTTGTA

>SRR2298546.251196 251196 length=502

AAATAAAAAGGAAAACCGGGGATCCCCCGGGTTTTGGCCCACTAGACGTTTTTTTTAACAGATCACCAAGATAGAGGTACCT  
GGCCCCAAATCAGATCCATAGTGTCACTTGTACCTATGGGTACCTTCTGGGCATCCTTCGTGGGCCCTTACAACCTAGTGT  
TTGCACTACTACCAGATCGGCAGGTACTAAGTATCTTCCACAACACCTCAGGTTTATAACCAATCCTAAAGGGTTTGTTA  
AACCTTGGCTTGTGTGGAACTTATTTGAAACAATACTTTGCTGTAAAGCATCCTATTTGCCAGCGGAACAACACCTGGTA  
ACAGGTGCCCTTGGGGCCAAAAGCCAAGGTTTAAACAAACCTTTAGGATTTGGTTATAAACCTGAGGTGTTGTGGAAGATA  
CTTAGTACCTGCCGATCTGGTAGTAGTCAAACACTAGTTGTAAGGCCACGAAGGATGCCAGAAAGGTACCCATAGGTA  
ACAAGTGACACTATGGATCTGA

>SRR2298546.245187 245187 length=502

GTGCCTTTTTCTTTATAAAAAAATCTTGACCGAATACCTTAGGATTTTGGAAAGTCCAATGCAATAAGCTACCCAAATATG  
GTAACATCAACTTGTGTAGCAGAACCTGAAGGTATGGATAAAAGGTGTCCAAACATAGACTTTTAGTTGCCCTAAGTCTGA  
CGAATCTGTTTTAACATAGTTTGTGTGTCAGCAACATAGGGGATACATAAAATCAGCCTGTGTGGTCTCAGCCAAATTCATCA  
ACACATGTGGTCCCAAACCTGTTGTGACATATGACTCAAAGTTAGAATTTGGAGCGTTTACCAATTTACCACATGTGTTG  
ATGAATTTGGCTGAGACCACACAGGCTGATTTATGTATCCCCTATGTTGCTGACACAAACTATGTTAAAAACAGATTCGTC  
AGACTTAGGGCAACTAAAAGTCTATGTTTGGACACCTTTATCCATACCTTCAGGTTCTGCTACACAAGTTGATGTTACCA  
TATTGGGTAGCTTATTGCAATT

>SRR2298546.222749 222749 length=502

CTGCTGGTGGTACTCAATACGTTTCGCCATGTTTCATAGAACCTGGCCCTTCTGCAATGTCAATTTTTCCCCTAGTCCACTT  
GTATTTAGTGTCTATTGTAAGAATTTTTCTTAAGATTTTGGCTTCCGCGTTGGTGCATTGTCTATAAATACCAACGCTTTGAC  
CGAATACCTTAGGATTTTGGAAAGTCCAATGCAATAAGCTACCCAAATATGGTAACATCAACTTGTGTAGCAGAACCTGAA  
GGTATGGATAAGTATGAACCCAAACCTGTTGTGACATATGACTCAAAGTTAGAATTTGGAGCGTTTACCAATTTACCACA  
TGTGTTGATGAATTTGGCTGAGACCACACAGGCTGATTTATGTATCCCCTATGTTGCTGACACAAACTATGTTAAAAACAG  
ATTCGTCAGACTTAGGGCAACTAAAAGTCTATGTTTGGACACCTTTATCCATACCTTCAGGTTCTGCTACACAAGTTGAT  
GTTACCATATTGGGTAGCTTAT

>SRR2298546.157639 157639 length=500

ATACTTTGCAGCAGTACGGTGTGGTTTTTCATTTTTCAAGTACAAGTGAATGTTAATCAAGGAACAGCCGGTAGTGCATTGG  
TGGTGTATGAACCCAAACCTGTTGTGACATATGACTCAAAGTTAGAATTTGGAGCGTTTACCAATTTACCACATGTGTTG  
ATGAATTTGGCTGAGACCACACAGGCTGATTTATGTATCCCCTATGTTGCTGACACAAACTATGTTAAAAACAGATTCGTC  
AGACTTAGGGGATTTTGGAAAGTCCAATGCAATAAGCTACCCAAATATGGTAACATCAACTTGTGTAGCAGAACCTGAAGG  
TATGGATAAAAGGTGTCCAAACATAGACTTTTAGTTGCCCTAAGTCTGACGAATCTGTTTTAACATAGTTTGTGTGTCAGCAA  
CATAGGGGATACATAAAATCAGCCTGTGTGGTCTCAGCCAAATTCATCAACACATGTGGTAAATTTGGTAAACGCTCCAAAT  
TCTAACTTTGAGTCATATGT

>SRR2298546.126450 126450 length=502  
GGATAAAGGTGTCCAAACATAGACTTTTAGTTGCCCTAAGTCTGACGAATCTGTTTTAACATAGTTTGTGTGTCAGCAACAT  
AGGGGATACATAAATCAGCCTGTGTGGTCTCAGCCAAATTCATCAACACATGTGGTAAATTTGGTAAACGCTCCAAATTTCT  
AACTTTGAGTCATATGTCACAACAGGTTTGGGTTTCATACACCACCAATGCACTACCGGCTGTTCCCTTGATTAACATTCAC  
TTGTACTTGAACCTTTGCAGCAGTACGGTGTGGTTTTCAATTTCAAGTACAAGTGAATGTTAATCAAGGAACAGCCGGTA  
GTGCATTGGTGGTGTATGAACCCAAACCTGTTGTGACATATGACTCAAAGTTAGAATTTGGAGCGTTTACCAATTTACCA  
CATGTGTTGATGAATTTGGCTGAGACCACACAGGCTGATTTATGTATCCCCATGTTGCTGACACAAACTATGTTAAAAAC  
AGATTCGTCAGACTTAGGGCAA

>SRR2298546.99806 99806 length=500  
ACCTGAAGGTATGGATAAAGGTGTCCAAACATAGACTTTTAGTTGCCCTAAGTCTGACGAATCTGTTTTAACATAGTTTGT  
TGTCAGCAACATAGGGGATACATAAATCAGCCTGTGTGGTCTCAGCCAAATTCATCAACACATGTGGTAAATTTGGTAAAC  
GCCCCAAATTTCTAACTTTGAGTCATATGTCACAACAGGTTTGGGTTTCATACACCACCAATGCACTACCGGCTGTTCCCTG  
ATTAACATTTCAATCAAGATACTTTGCAGCAGTACGGTGTGGTTTTCAATTTCAAGTACAAGTGAATGTTAATCAAGGAAC  
AGCCGGTAGTGCATTGGTGGTGTATGAACCCAAACCTGTTGTGACATATGACTCAAAGTTAGAATTTGGGGCGTTTACCA  
ATTTACCACATGTGTTGATGAATTTGGCTGAGACCACACAGGCTGATTTATGTATCCCCATGTTGCTGACACAAACTAT  
GTTAAAAACAGATTCGTCAGA

>SRR2298546.97210 97210 length=501  
ATACTTTGCAGCAGTACGGTGTGGTTTTCAATTTTCAAGTACAAGTGAATGTTAATCAAGGAACAGCCGGTAGTGCATTGG  
TGGTGTATGAACCCAAACCTGTTGTGACATATGACTCAAAGTTAGAATTTGGAGCGTTTACCAATTTACCACATGTGTTG  
ATGAATTTGGCTGAGACCACACAGGCTGATTTATGTATCCCCATGTTGCTGACACAAACTATGTTAAAAACAGATTCGTC  
AGACTTAGGGGTCCAATTTGCAATAAGCTACCCAATATGGTAAACATCAACTTGTGTAGCAGAACCTGAAGGTATGGATAAA  
GGTGTCCAAACATAGACTTTTAGTTGCCCTAAGTCTGACGAATCTGTTTTAACATAGTTTGTGTGTCAGCAACATAGGGGAT  
ACATAAATCAGCCTGTGTGGTCTCAGCCAAATTCATCAACACATGTGGTAAATTTGGTAAACGCTCCAAATTTCTAACTTTG  
AGTCATATGTCACAACAGGTT

>SRR2298546.95609 95609 length=501  
ATACCAACGTCCTGACCGAATACCCCTAGGATTTTGGGAAGTCCAATTTGCAATAAGCTACCCAATATGGTAAACATCAACTTG  
TGTAGCAGAACCTGAAGGTATGGATAAAGGTGTCCAAACATAGACTTTTAGTTGCCCTAAGTCTGACGAATCTGTTTTAA  
CATAGTTTGTGTGTCAGCAACATAGGGGATACATAAATCAGCCTGTGTGGTCTCAGCCAAATTCATCAACACATGTGGTAAA  
TTGGTAAACGACCCAAACCTGTTGTGACATATGACTCAAAGTTAGAATTTGGAGCGTTTACCAATTTACCACATGTGTTG  
ATGAATTTGGCTGAGACCACACAGGCTGATTTATGTATCCCCATGTTGCTGACACAAACTATGTTAAAAACAGATTCGTC  
AGACTTAGGGCAACTAAAAGTCTATGTTTGGACACCTTTATCCATACCTTCAGGTTCTGCTACACAAGTTGATGTTACCA  
TATTGGGTAGCTTATTGCAAT

>SRR2298546.66936 66936 length=502  
CTGCTGGTGGTACTCAATACGTTTCGCCATGTTTCATAGAACCTGGCCCTTCTGCAATGTCAATTTTTCCCTAGTCCACTT  
GTATTTAGTGTCTATTGTAAGAATTTTCTTAAGATTTTGGCTCCGCGTTGGTGCATTGTCATAAATACCAACGTCCTGAC  
CGAATACCCCTAGGATTTTGGGAAGTCCAATTTGCAATAAGCTACCCAATATGGTAAACATCAACTTGTGTAGCAGAACCTGAA  
GGTATGGATAAGTATGAACCCAAACCTGTTGTGACATATGACTCAAAGTTAGAATTTGGAGCGTTTACCAATTTACCACA  
TGTGTTGATGAATTTGGCTGAGACCACACAGGCTGATTTATGTATCCCCATGTTGCTGACACAAACTATGTTAAAAACAG  
ATTCGTCAGACTTAGGGCAACTAAAAGTCTATGTTTGGACACCTTTATCCATACCTTCAGGTTCTGCTACACAAGTTGAT  
GTTACCATATTGGGTAGCTTAT

>SRR2298546.54401 54401 length=502  
ACCTGGAGGTATGGATAAAGGTGTCCAAACATAGACTTTTAGTTGCCCTAAGTCTGACGAATCTGTTTTAACATAGTTTGT  
TGTCAGCAACATAGGGGATACATAAATCAGCCTGTGTGGTCTCAGCCAAATTCATCAACACATGTGGTAAATTTGGTAAAC  
GCTCCAAATTTCTAACTTTGAGTCATATGTCACAACAGGTTTGGGTTTCATACACCACCAATGCACTACCGGCTGTTCCCTG  
ATTAACATTTCAAGTTTTTCAATTTCAAGTACAAGTGAATGTTAATCAAGGAACAGCCGGTAGTGCATTGGTGGTGTATGAA  
CCCAAACCTGTTGTGACATATGACTCAAAGTTAGAATTTGGAGCGTTTACCAATTTACCACATGTGTTGATGAATTTGGC  
TGAGACCACACAGGCTGATTTATGTATCCCCATGTTGCTGACACAAACTATGTTAAAAACAGATTCGTCAGACTTAGGGC  
AACTAAAAGTCTATGTTTGGAA

>SRR2298546.35865 35865 length=501  
GATAAAGGTGTCCAAACATAGACTTTTAGTTGCCCTAAGTCTGACGAATCTGTTTTAACATAGTTTGTGTGTCAGCAACATA  
GGGGATACATAAATCAGCCTGTGTGGTCTCAGCCAAATTCATCAACACATGTGGTAAATTTGGTAAACGCTCCAAATTTCTA  
ACTTTGAGTCATATGTCACAACAGGTTTGGGTTTCATACACCACCAATGCACTACCGGCTGTTCCCTTGATTAACATTCAC  
TGTACTTGAACCTTTGCAGCAGTACGGTGTGGTTTTCAATTTCAAGTACAAGTGAATGTTAATCAAGGAATAGCCGGTAG  
TGCATTGGTGGTGTATGAACCCAAACCTGTTGTGACAGATGACTCAAAGTTAGAATTTGGAGCGTTTACCAATTTACCAC  
ATGTGTTGATGAATTTGGCTGAGACCACACAGGCTGATTTATGTATCCCCATGTTGCTGACACAAACTATGTTAAAAACA  
GATTCGTCAGACTTAGGGCAA

>SRR2298546.32844 32844 length=501  
GGTATGGATAAAGGTGTCCAAACATAGACTTTTAGTTGCCCTAAGTCTGACGAATCTGTTTTAACATAGTTTGTGTGTCAGC  
AACATAGGGGATACATAAATCAGCCTGTGTGGTCTCAGCCAAATTCATCAACACATGTGGTAAATTTGGTAAACGCTCCAA



ATTCTAACTTTGAGTCATATGTCACAACAGGTTTGGGTTTCATACACCACCAATGCACTACCGGCTGTTCCCTTGATTAACA  
TTCACTTGTAGGTTAGATTGGAGACACATGAGTGGGCACCAACCTGGGCTAGAGGACATCAGATAACCCATGTGGAACTA  
CCAAAAGTCTTTTGGGACAAAAACAGCAAGCCAGCCTATGGCCAATCAAGATACTTTGCAGCAGTACGGTGTGGTTTTCA  
TTTTCAAGTACAAGTGAATGTTAATCAAGGAACAGCCGGTAGTGCATTTGGTGGTGTATGAACCCAAACCTGTTGTGACAT  
ATGACTCAAAGTTAGAATTTG

>SRR2298546.26481 26481 length=502

GTACGGTGTGGTTTTTCATTTTCAAGTACAAGTGAATGTTAATCAAGGAACAGCTGGTAGTGCATTTGGTGGTGTATGAACC  
CAAACCTGTTGTGACATATGACTCAAAGTTAGAATTTGGAGCGTTTACCAATTTACCACATGTGTTGATGAATTTGGCTG  
AGACCACACAGGCTGATTTATGTATCCCTATGTTGCTGACACAAACTATGTTAAAACAGATTCGTCAGACTTAGGGCAA  
CTAAAAGTCTAATTGATTGCGCTGCAGTGGTACTCAATACGTTTCGCCATGTTTCATAGAACCTGGCCCTTCTGCAATGTCA  
ATTTTTCCCTTAGTCCACTTGTATTTAGTGTCTATTGTAAGAAATTTCTTAAAGATTTTGCTTCCGCGTTGGTGCATTTGTC  
ATAAATACCAACGTTTACCAGACTACCTAGGATTTTGGAAAGTCCAATTTGCAATAAGCTACCCAATATGGTAACATCAA  
CTTGTGTAGCAGAACCTGAAGG

>SRR2298382.120527 120527 length=502

AGTTGTAAGGCCACGAAGGATGCCAGAAGGTACCCATAGGTAACAAGCGACACTATGGATCTGATCTGGGGCCAGGTA  
CCTCTATCTTGGTGTATCTGGTTAAAAAACGTTAGTGGGCCAAACCCGGGGGGATCCCCGGTTTCCCTTTATTTTATCA  
ATGCCACTATGAGGACAATTAAGAGTATTGCAGATATGGCGACCGGAGTGGTCAGTTCAGTTGATTCCACTATCAATGTA  
GTTAATGAGAGCTACATCTTTGTTCTCTGGTTCAGCTGTTGTAGCATAGCAATTTGGTCCGAGCACATTAGAAGCATCAT  
CTGCAACTTTGGTTAATAAAATTAACCTCCAATTTTCAATACCTACATTTTCCACTCTCTCATTAACCTACATTGATAGTGGAA  
TCAACTGAACTGACCACTCCGGTCGCCATATCTGCAATACTCTTAATTTGCTCCATAGTGGCATTTGATAAAAAATAAAGGA  
AACCGGGGATCCCCCGGGTT

>SRR2298382.82939 82939 length=502

GCAAACTAGTTGTAAGGCCACGAAGGATGCCAGAAGGTACCCATAGGTAACAAGCGACACTATGGATCTGATCTGG  
GGCCAGGTACCTCTATCTTGGTGTATCTGGTTAAAAAACGTTAGTGGGCCAAACCCGGGGGGATCCCCGGTTTCCCTTT  
ATTTTATCAATGCCACTATGGAGACAATTAAGAGTATTGCAGATATGGCGACCGGAGTGGTCAGTTCAGTTGATTCCACT  
ATCAATGTAGTCATTAGAAGCATCATCTGCAACTTTGGTTAATAAAATTAACCTCCAATTTTCAATACCTACATTTTCCACTC  
TCTCATTAACCTACATTGATAGTGGAAATCAACTGAACTGACCACTCCGGTCGCCATATCTGCAATACTCTTAATTTGCTCC  
ATAGTGGCATTTGATAAAAAATAAAGGAAACCGGGGATCCCCCGGGTTTGGCCCACTAGACGTTTTTTTAAACCAGATCACC  
AAGATAGAGGTACCTGGCCCCA

>SRR2298578.1015405 1015405 length=500

TTGGTGGTGTATGAACCCAAACCCGTTGTGACATATGACTCAAAGTTAGAATTTGGAGCATTTACCAATCTACCACATGT  
GTTGATGAATTTGGCTGAGACCACACAGGCTGATTTATGTATCCCTATGTTGCTGACACAACTATGTTAAAACAGATT  
CGTCAGACTTAGGGCACTAAAAGTCTATGTTTGGACACCTTTATCCATACCTTCAGGTTCTGCTACACAAGTTGATGTA  
ACCAAATTTGGTACCCAATATGTTTACATCAACTTGTGTAGCAGAACCTGAAGGTATGGATAAAGGTGTCCAAACATAGA  
CTTTTAGTTGCCCTAAGTCTGACGAATCTGTTTTAACATAGTTTGTGTGACCAACATAGGGGATACATAAATCAGCCTGT  
GTGGTCTCAGCCAAATTCATCAACACATGTGGTAGATTTGGGAAAGGCTCCAATTTCTAACTTTAAGTCATAAGTAACAAC  
GGTTTTGGGTTCAAAACCA

>SRR2298578.709605 709605 length=500

AGGTTTAAACAAACCCCTTTAGGATTTGGTTCTAAAACCTGAGATGTTGTAGAAGATACTTAGTACCTACCGATCTGGTAGTAG  
TGCAAACTAGTTGTAAGGCCACGAAGGATGCCAGAAGGTACCCATAGGTAACAAGCGACACTATGGATCTGATCTG  
GGCCAGGTACCTCTATCTTGGTGTATCTGGTTAAAAAACGTTAGTGGGCCAAACCCGGGGGGATCCCCGGTTTCCCTTT  
TATTTTATCAGCTGTTGTAGCATAGCAATTTGGTACGAGCACATTAGAAGCATCATCTGCAACTTTGGTTAATAAAATTA  
CTCAATTTTCAATACCTACATTTTCCACTCTCTCATTAACCTGCATTTGATAGTGGAAATCAACTGAACTGACCACTCCGGTC  
ACCATATTTGCAATACTCTTAACCTGTCTCCATAATGACATTTGATAAAAAATAAAGGAAACCGGGGATCCCCCGGGTTTT  
GCCCCAAAAACGGTTTTTCAA

>SRR2298578.324805 324805 length=500

GGTTACATCAACTTGTGTAGCAGAACCTGAAGGTATGGATAAAGGTGTCCAAACATAGACTTTTAGTTGCCCTAAGTCTG  
ACGAATCTGTTTTAACATAGTTTTGTGTGACGAACATAGGGGATACATAAATCAGCCTGTGTGGTCTCAGCCAAATTCATC  
AACACATGTGGTAGATTGGTAAATGCTCCAAATTTCAACCTTGAGTCATATGTCACAACGGGTTTTGGGTTTCATACACCAC  
CAATGCCTAATCAAGATACTTTGCAGCAGTACGGTGTGGTTTTTCACTTTCAAGTGAAGTGAATGTTAATCAAGGAACA  
GCTGGTAGTGCATTTGGTGGTGTATGAACCCAAACCCGTTGTGACATATGACTCAAGGTTAGAATTTGGAGCATTTACCAA  
TCTACCACATGTGTTGATGAATTTGGCTGAGACCACACAGGCTGATTTATGTATCCCAATGTTGCTGACACAACTATG  
TAAAACAGATTTCGTAGAC

>SRR2298578.152921 152921 length=500

CTCCATAGTGCATTTGATAAAAAATAAAGGAAACCGGGGATCCCCCGGGTTTGGCCCACTAGACGTTTTTTTAAACCAGAT  
CACCAAGATAGAGGTACCTGGCCCCAGATCAGATCCATAGTGTGCTGCTTGTACCTATGGGTACCTTCTGGGCATCCTTCCG  
TGGGCCTTACAACCTAGTGTGTTGCACTACTACCAGATCGGTAGGTACTAAGTATCTTCTACAACATCTCAGGTTTGAAGCC  
AATCCTAAAGGGTTTAAACAAACCCCTTTAGGATTTGGTTCTAAACCTGAGATGTTGTAGAAGATACTTAGTACCTACCGATC  
TGGTAGTAGTGCAAACTAGTTGTAAGGCCACGAAGGATGCCAGAAGGTACCCATAGGTAACAAGCGACACTATGGA

TCTGATCTGGGGCCAGGTACCTCTATCTTGGTGATCTGGTTAAAAAACGTCTAGTGGGCCAAAACCCGGGGGGGATCCCCG  
GTTTCCTTTTATTTTATCAA  
>SRR2298578.127237 127237 length=500  
GGTTACATCAACTTGTGTAGCAGAACCTGAAGGTATGGATAAAGGTGTCCAAACATAGACTTTTATGTTGCCCTAAGTCTG  
ACGAATCTGTTTTAACATAGTTTTGTGTGTCAGCAACATAGGGGATACATAAATCAGCCTGTGTGGTCTCAGCCAAATTCATC  
AACACATGTGGTAGATTGGTAAATGCTCCAAATCTAACTTTGAGTCATATGTCACAACGGGTTTGGGTTTCATACACCAC  
CAACGCTAGGCTAGAGGACATAAGATAACTCATGTGGAATTACCAAAAGTCTTTTGGGACAAAAACAGCAAGCCAGCC  
TATGGCCAATCAAGATACTTTGCAGCAGTACGGTGTGGTTTTCACTTTCAAGTGCAAGTTAATGTTAATCAAGGAACAGC  
TGGTAGTGCCTGGTGGTGTATGAACCCAAACCCGTTGTGACATATGAATCAAAGTTAGAAATTTGGAGCATTACCAAGC  
TACCACAGGTGTTGAGGAAT  
>SRR2298578.101425 101425 length=500  
TTAGAAGCATCATCTGCAACTTTGGTTAATAAATACCTCCAATTTTATTACCTACATTTTTCCACTCTCTCATTAAGTGC  
ATTGATAGTGGAAATCAACTGAACTGACCCTCCGGTCACCATATTTGCAATACTCTTAACTGTCTCCATTGTGACATTGA  
TAAAAATAAAGGAAACCGGGGATCCCCCGGGTTTGGCCACTAGACGTTTTTTTAAACCAGATCACCAAGATAGAGGTAC  
CTGGCCCCAGAAGTTTGTGAGACGTCTGGTGACGTGTGGAACTTATTTGAAACAACATTTTGTCTGTAAGCATCCTATT  
GCCAGCGAACAACACCTGGTAAACAGGTGCCTCTGGGGCCAAAAGCCAAGGTTTAAACAAACCCTTTAGGATTGGTTCTAA  
ACCTGAGATGTTGTAGAAGATACTTAGTACCTACCGATCTGGTAGTAGTGCAAACACTAGTTGTAAGGCCACGAAGGAA  
GCCAGAAGGTACCCATAGG  
>SRR2298578.37539 37539 length=500  
GAACAACACCTGGTAAACAGGTGCCTCTGGGGCCAAAAGCCAAGGTTTAAACAAACCCCTTTAGGATTGGTTCTAAACCTGAG  
ATGTTGTAGAAGATACTTAGTACCTACCGATCTGGTAGTAGTGCAAAACACTAGTTGTAAGGCCACGAAGGATGCCCAGA  
AGGTACCCATAGGTAACAAGCGACACTATGGATCTGATCTGGGGCCAGGTACCTCTATCTTGGTGATCTGGTTAAAAAAC  
GTCTAGTGGGAAGGAAACCGGGGATCCCCCGGGTTTGGCCACTAGACGTTTTTTTAAACCAGATCACCAAGATAGAGGT  
ACCTGGCCCCAGATCAGATCCATAGTGTGCTTGTACCTATGGGTACCTTCTGGGCATCCTTCGTGGGCCCTTACAAC  
GTGTTTGCCTACTACCAGATCGGTAGGTACTAAGGATCTTCTACAACATCTCAGGTTTAAACCAATCCTAAAGGGTTT  
GTTAAACCTTGGCTTTTGGC  
>SRR2298578.35484 35484 length=500  
GTGAATGTTAATCAAGGAACAGCTGGTAGTGCATTGGTGGTGTATGAACCCAAACCCGTTGTGACATATGACTCAAAGTT  
AGAATTTGGAGCATTACCAATCTACCACATGTGTTGATGAATTTGGCTGAGACCACACAGGCTGATTTATGTATCCCCCT  
ATGTTGCTGACACAACTATGTTAAAAACAGATTCGTCAGACTTAGGGCAACTAAAAAGTCTATGTTTGGAAACCTTTATCC  
ATACCTTCAGTCTTTCCCTAGACCCTTGTATTTAGTGCTCATTTGTAAGAATTTTTTTTTTAGATTTTGTCTCCGCGTTG  
GCGCATTTGCATAAATAACCAACGCCCTGGCCGAATACCTAGGGTTTTTGGAAAGTCCAATTGCAATAAGATAACCAATATG  
GTTACATCAACTTGTGTAGCAGAACCTGAAGTTATGGATAAAGGGACACAAAAATAGACTTTTAGTTGCCACAAGTCGGA  
AGAATATGGTTTAAAAAAGT  
>SRR2298573.877192 877192 length=500  
GCAATACTCTTAATTTGTCTCCATAGTGGCATTGATAAAAAATAAAGGAAACCGAGGATCCCCCGGGTTTGGCCACTAG  
ACGTTTTTTTAAACCAGATCACCAAGATAGAGGTACCTGGCCCCAGATCAGATCCATAGTGTGCTTGTACCTATGGGTAC  
CTTCTGGGCATCCTTCGTGGGCCCTTACAACACTAGTGTTTGCACTACTACCAGATCGGTAGGTACTAAGTATCTTCCACAAA  
ATCTCAGGTTCCCTTTAGGATTGGTTCTAAACCTGAGATGTTGTGGAAAGATACTTAGTACCTACCGATCTGGTAGTAGTG  
CAAACACTAGTTGTAAGGCCACGAAGGATGCCAGAAGGTACCCATAGGTAACAAGCGACACTATGGATCTGATCTGGG  
GCCAGGTACCTCTATCTTGGTGATCTGGTTAAAAAACGTCTAGTGGGCCAAAACCCGGGGGGGATCCCCGGTTTCTTTTAT  
TTTTATCAATGCCACTATGGC  
>SRR2298573.875792 875792 length=500  
CCATAGTGGCATTGATAAAAAATAAAGGAAACCGGGGATCCCCCGGGTTTGGACCCACTAGACGTTTTTTTAAACCAGATCA  
CCAAGATAGAGGTACCTGGCCCCAGATCAGATCCATAGTGTGCTTGTACCTATGGGTACCTTCTGGGCATCCTTCGTG  
GGCCTTACAACACTAGTGTGTTGCACTACTACCAGATCGGAAGGAACTAAGTATCTTCCACAACATCCCAGGTTTAGAACC  
TCTTAAACCGCTTTAGGATTGGTTCTAAACCTGAGATGTTGTGGAAAGATACTTAGTACCTACCGATCTGGTAGTAGTGCA  
AACACTAGTTGTAAGGCCACGAAGGATGCCAGAAGGTACCCATAGGTAACAAGCGACACTATGGATCTGATCTGGGGC  
CAGGTACCTCTATCTTGGTGATCTGGTTAAAAAACGTCTAGTGGGCCAAAACCCGGGGGGGATCCCCGGTTTCTTTTAT  
TTATCAATGCCACTATGGC  
>SRR2298573.875646 875646 length=500  
CACACAGCCATCTCTAGTAAGTTTTGTGAGACGTCTGGTGACGTGTGGAACTTATTGGAACAACATTTTGTCTGTAAG  
CATCTTATGCGACGGAACAACACCTGGTAACAGGTGCCTCTGGGGCCAAAAGCCAAGGTTTAAACAAACCCCTTTAGGAT  
TGGTTCTAAACCTGAGATGTTGTGGAAGATACTTAGTACCTACCGATCTGGAAAGTAGTGCAAAACACTAGTTGTAAGGCC  
CCGAAGGATGATAAATACCTCCAATTTTATTACCTACATTTTTCCACTCTCTCATTAACCTACATTTGATAGTGGAAATCAAC  
TGAACCTGACCCTCCGGTGCCTATCTGCAATACTCTTAATTTGTCTCCATAGTGGCATTGATAAAAAATAAAGGAAACCG  
GGGATCCCCCGGGTTTGGCCCCCTAGACGTTTTTTTAAACCAGATCACCAAGATAAAGGTACCTGGCCCCAGATCAGTCC  
CATAGGGTGCCTTGTACCA  
>SRR2298573.865497 865497 length=500

TTTTTAACCAGATCACCAAGATAGAGGTACCTGGCCCCAGATCAGATCCATAATGTCGCTTGTACCTATGGGTACCTTC  
TGGGCATCCTTCGTGGGCCCTTACAACCTAGTGTGTTGCACTACTACCAGATCGGTAGGTACTAAGTATCTTCCACAACATCT  
CAGGTTTAGAACCAATCCTAAAAGGGTGTGTTAAACCTTGCTTTTTGCCCCAGAGGCACCTGTTACCAGGTGTTGTTCCG  
CTGGCAATAGTCTTATGTCAGCGGAACAACACCTGGTAACAGGTGCCTCTGGGGCCAAAAGCCAAGGTTTAACAAAACCC  
TTTAGGATTGGTCTAAACCTGAGATGTTGTGGAAGATACTTAGTACCTACCGATCTGGTAGTAGTGCAAACACTAGTTG  
TAAGGCCACGAAGAATGCCAGAAGGTACCCATAGGTAACAAGCGACACTATGGATCTGATCTGGGGCCCCGTACCTCA  
ATCTTGGGGATCGGGTTAAA

>SRR2298573.848975 848975 length=500

CCCTTTAGGATTGGTCTAAACCTGAGATGTTGTGGAAGATACTTAGTACCTACCGATCTGGTAGTAGTGCAAACACTAG  
TTGTAAGGCCACGAAGGATGCCAGAAAGGTACCCATAGGTAACAAGCGACACTATGGATCTGATCTGGGGCCAGGTACC  
TCTATCTTGGTGATCTGGTTAAAAAACGTCTAGTGGGCCAAAACCCGGGGGGATCCCCGGTTTCTTTTATTTTATCAAT  
GCCCCAATGGCATTAAATAGTGAATCAACTGAACTGACCACTCCGGTCGCCATATCTGCAATACTCTTAATTTGTCTCCAT  
AGTGGCATTGATAAAAATAAAAGGAAACCGGGGATCCCCCGGGTTTGGCCACTAGACGTTTTTTAACCAGATCACCAA  
GATAGAGGTACCTGGCCCCAGATCAGATCCATAGTGTGCTTGTACCTATGGGTACCTTCTGGGCATCCTTCGTGGGCC  
TTACAACACGGGTTTGCACA

>SRR2298573.846971 846971 length=500

GATCCATAGTGTGCTTGTACCTATGGGTACCTTCTGGGCATCCTTCGTGGGCCCTTACAACCTAGTGTGTTGCACTACTAC  
CAGATCGGTAGGTACTAAGTATCTTCCACAACATCTCAGGTTTAGAACCAATCCTAAAAGGGTGTGTTAAACCTTGCTTT  
TGGCCCCAGAGGCACCTGTTACCAGGGGTTGTTCCGCTGGCAATAGGAGGCTTTACAGCAAAAAGGTTGTTTCCAATAAGT  
TCCACACCGCTAGTAAGTTTGTGAGACGCTCTGGTGACGTGTGGGAACTTATTGGAAAACAACATTTTGTCTGTAAGCATC  
CTATTGCCAGCGGAACAACACCTGGTAACAGGTGCCTCTGGGGCCAAAAGCCAAGGTTTAACAAAACCTTTAGGATTGGT  
TCTAAACCTGAGATGTTGTGGAAGATACTTAGTACCTACCGATCTGGTAGTAGGGCAAACACTAGTTGTAAGGCCACGA  
AGGATGCCAGAAGGGACCC

>SRR2298573.840452 840452 length=500

GTTGTGGAAGATACTTAGTACCTACCGATCTGGTAGTAGTGCAAACACTAGTTGTAAGGCCACGAAGGATGCCAGAAG  
GTACCCATAGGTAACAAGCGACACTATGGATCTGATCTGGGGCCAGGTACCTCTATCTTGGTGATCTGGTTAAAAACGT  
CTAGTGGGCCAAAACCCGGGGGGGATCCCCGGTTTCTTTTATTTTATCAATGCTACAATGGAGAAAAATTAAGAGTATTGC  
AGATATGGCGCGCCATATCTGCAATACTCTTAATTTGTCTCCATAGTAGCATTGATAAAAATAAAAGGAAACCGGGGATCCC  
CCCCGGGTTTGGCCACTAGACGTTTTTTAACCAGATCACCAAGATAGAGGTACCTGGCCCCAGATCAGATCCATAGTGT  
CGCTTGTACCTATGGGTACCTTCTGGGCATCCTTCTTGGGCCCTTACAACCAGTGTGTTGCACTACAACCAGATCGGTAGG  
GACTAAGTAACTTCCACAAC

>SRR2298573.822160 822160 length=500

TTGTGGACCTTATGCTCACACAGCCATCCTCTAGTAAGTTTGTGAGACGCTCTGGTGACGTGTGGGAACTTATTGGAACA  
ACATTTTGTCTGTAAGCATCCTATTGCCAGCGGAACAACACCTGGTAACAGGTGCCTCTGGGGCCAAAAGCCAAGGTTTA  
ACAAAACCTTTAGGATTGGTCTAAACCTGAGATGTTGTGGAAGATACTTAGAACCTACCGATCTGGTAGTAGTGCAAAC  
CCTAGTTGTAGTGTGCTTGTACCTATGGGTACCTTCTGGGCATCCTTCGTGGGCCCTTACAACCTAGTGTGTTGCACTACT  
ACCAGATCGGTAGGTACTAAGTATCTTCCACAACATCTCAGGTTTAGAACCAATCCTAAAAGGGTGTGTTAAACCTTGCT  
TTTGGCCCCAGAGGCACCTGTTACCAGGTGTTGTTCCGCTGGCAATAGGATGCTTTACAGCAAAAATGTTTGTTCCAATAA  
GTTCCCCACGTCACCCGAC

>SRR2298573.820287 820287 length=500

AACCGGGATCCCCCGGGTTTGGCCACTAGACGTTTTTTAACCAGATCACCAAGATAGAGGTACCTGGCCCCAGATC  
AGATCCATAGTGTGCTTGTACCTATGGGTACCTTCTGGGCATCCTTCGTGGGCCCTTACAACCTAGTGTGTTGCACTACTA  
CCAGATCGGTAGGTACTAAGTATCTTCCACAACATCTCAGGTTTAGAACCAATCCTAAAAGGGTGTGTTAAACCTTGCT  
TTGGCCCCAGGGTAGCAGGTGCTCTGGGGCCAAAAGCCAAGGTTTAACAAAACCTTTAGGATTGGTCTAAACCTGAGA  
TGTTGTGGAAGATACTTAGTACCTACCGATCTGGTAGTAGTGCAAACACTAGTTGTAAGGCCACGAAGGATGCCAGAA  
GGTACCCACAGGTAACAAGCGAACCCCTTGGAACTAATCTGGGGCCAGGAACCCCGATCTTGGGGATCTGGTTAAAAAAGG  
TCTAGGGGGCCAAAACCCGGG

>SRR2298573.818488 818488 length=500

CTAGTTGTAAGGCCACGAAGGATGCCAGAAAGGTACCCATAGGTAACAAGCGACACTATGGATCTGATCTGGGGCCAGG  
TACCTCTATCTTGGTGATCTGGTTAAAAAACGTCTAGTGGGCCAAAACCCGGGGGGATCCCCGGTTTCTTTTATTTTAT  
CAATGCCACTATGGAGACAATTAAGAGTATTGCAGATATGGCGACCGGAGTGGTCAGTTCAGTTGATTCCACTATCAATG  
TAGTTAATGATTAGAAGCATCATCTGCAACTTTGGTTAATAAATACCTCCAATTTCAATACCTACATTTTCCACTCTCT  
CATTAACTACATTGATAGTGAATCAACTGAACTGACCACTCCGGTCGCCATATCTGCAATACTCTTAATTTGTCTCCATA  
GTGGCATTGATAAAAATAAAAGGAAACCGGGGATACCCCCGGGTTTGGCCACTAGACGTTTTTTAACCAGATCACCAAG  
AAAGAGGTACCTGGCCCCAA

>SRR2298573.813908 813908 length=500

CGCCATATCTGCAATACTCTTAATTTGTCTCCATAGTGGCATTGATAAAAATAAAAGGAAACCGGGGATCCCCCGGGTTT  
GGCCACTAGACGTTTTTTAACCAGATCACCAAGATAGAGGTACCTGGCCCCAGATCAGATCCATAGTGTGCTTGTAC  
CTATGGGTACCTTCTGGGCATCCTTCGTGGGCCCTTACAACCTAGTGTGTTGCACTACTACCAGATCGGTAGGGACTAAGAAT

CTTCCACAAAACCTGAGATGTTGTGGAAGATACTTAGTACCTACCGATCTGGTAGTAGTGCAAAACACTAGTTGTAAGGCC  
ACGAAGGATGCCCAGAAGGTACCCATAGGTAACAAGCGACACTATGGATCTGATCTGGGGCCAGGTACCTCTATCTTGGT  
GATCTGGTTAAAAAACGTTCTAGTGGGCCAAAACCCGGGGGGGATCCCCGGTTTCCTTTTATTTTATCAATGCCACTATGGA  
GACAATTAAGAGTATTGCGA

>SRR2298573.810041 810041 length=500

CTTTAGGATTGGTTCTAAACCTGAGATGTTGTGGAAGATACTTAGTACCTACCGATCTGGTAGTAGTGCAAAACACTAGTT  
GTAAGGCCACGAAGGTACCCAGAAGGTACCCATAGGTAACAAGCGACACTATGGATCTGATCTGGGGCCAGGTACCTC  
TATCTTGGTGATCTGGTTAAAAAACGTTCTAGTGGGCCAAAACCCGGGGGGGATCCCCGGTTTCCTTTTATTTTATCAATGC  
CACTATGGAGGTTCCATAAGTGGCATTGATAAAAATAAAAAGGAAACCCGGGGATCCCCCGGGTTTGGCCCACTAGACGTT  
TTTTAACCAGATCACCAAGATAGAGGTACCTGGCCCCAGATCAGATCCATAGTGTGCGCTTGTACCTATGGGTACCTTCT  
GGGCATCCTTCGTGGGCCTTACAACCTAGTGTTCGCACTACTACCAGATCGGTAGGTACTAAGAATCTTCCACAACACCCC  
AGGTTTAGAACCAATCCTAA

>SRR2298573.807498 807498 length=500

CAGCCATCCTCTAGTAAGTTTGTGAGACGTTCTGGTGACGTTGGGAACTTATTTGGAAACAACATTTTGTCTGTAAGCATC  
CTATTGCCAGCGGAACAACACCTGGTAACAGGTGCCTCTGGGGCCAAAAGCCAAGGTTTAAACAAACCTTTAGGATTGGT  
TCTAAACCTGAGATGTTGTGGAAGATACTTAGTACCTACCGATCTGGTAGTAGTGCAAAACACTAGTGTAAGGCCACGA  
AGGAGGCCACACTAGACGTTTAAACCAGATCACCAAGATAGAGGTACCTGGCCCCAGATCAGATCCATAGTGTGCGCT  
TGTTACCTATGGGTACCTTCTGGGCATCCTTCGTGGGCCTTACAACCTAGTGTTCGCACTACTACCAGATCGGTAGGTACT  
AAGTATCTTCCACAACATCTCAGGTTTAGAACCAATCCTAAAGGGTTTGTAAACCTTGGCTTTTGGCCCCAGAGGCACC  
CGTTACCAGGTGTTGTTCCG

>SRR2298573.802882 802882 length=500

CTCATTAACCTACATTTGGTAGTGGAACTCAACTGAACTGACCACTCCGGTCGCCATATCTGCAATACTCTTAATTGTCTCCA  
TAGTGGCATTGATAAAAATAAAAAGGAAACCCGGGGATCCCCCGGGTTTGGCCCACTAGACGTTTAAACCAGATCACCA  
AGATAGAGGTACCTGGCCCCAGATCAGATCCATAGTGTGCGTGGTTACCTATGGGTACCTTCTGGGCATCCTTCTTGGGC  
CTTACAACCTGGGTTTAAACAAACCTTTAGGATTGGTTCTAAACCTGAGATGTTGTGGAAGATACTTAGTACCTACCGATC  
TGGTAGTAGTGCAAAACACTAGTTGTAAGGCCACGAAGGATGCCAGAGGTACCCATAGGTAACAAGCGACACTATGGA  
TCTGATCTGGGGCCAGGTACCTCTATCTTGGTGATCTGGTTAAAAAACGTTCTAGTGGGCCAAAACCCGGGGGGGATCCCCG  
GGTTCCCTTTTATTTTATCAA

>SRR2298573.798101 798101 length=500

CTGAGATGTTGTGGAAGATACTTAGTACCTACCGATCTGGTAGTAGTGCAAAACACTAGTTGTAAGGCCACGAAGGATGC  
CCAGAAGGTACCCATAGGTAACAAGCGACACTATGGATCTGATCTGGGGCCAGGTACCTCTATCTTGGTGATCTGGTTAA  
AAAACGTTCTAGTGGGCCAAAACCCGGGGGGGATCCCCGGTTTCCTTTTATTTTATCAATGCCACTATGGAGACAATTA  
GTATTGCAGAACATTTAGAAGCATCATCTGCAACTTTGGTTAATAAATTAACCTCAATTTTATTACCTACATTTTCCACTC  
TCTCATTAACCTACATTTGATAGTGAATCAACTGAACTGACCACTCCGGTCGCCATATCTGCAATACTCTTAATTGTCTCC  
ATAGTGGCATTGATAAAAATAAAAAGGAAACCCGGGGATCCCCCGGGTTTGGCCCACTAAACGTTTAAACCAGATAACC  
AAGAAAGAGGACCCTGGCCC

>SRR2298573.793667 793667 length=500

GCCAAAAGCCAAGGTTTAAACAAACCTTTAGGATTGGTTCTAAACCTGAGATGTTGTGGAAGATACTTAGTACCTACCGA  
TCTGGTAGTAGTGCAAAACACTAGTTGTAAGGCCACGAAGGATGCCAGAAGGTACCCATAGGTAACAAGCGACACTATG  
GATCTGATCTGGGGCCAGGTACCTCTATCTTGGTGATCTGGTTAAAAAACGTTCTAGTGGGCCAAAACCCGGGGGGGATCCC  
CGGTTCCCTTCTCTTAATTGTCTCCATAGTGGCATTGATAAAAATAAAAAGGAAACCCGGGGATCCCCCGGGTTTGGCCCA  
CTAGACGTTTAAACCAGATCACCAAGATAGAGGTACCTGGCCCCAGATCAGATCCATAGTGTGCGCTTGTACCTATGG  
GTACCTTCTGGGCATCCTTCGTGGGCCTTACAACCTAGTGTTCGCACTACTACCAGATCGGTAGGAACTAAGTATCTTCCC  
AAAAATCCCAGGTTTAGAAC

>SRR2298573.793320 793320 length=500

GCAATACTCTTAATTGTCTCCATAGTGGCATTGATAAAAATAAAAAGGAAACCCGGGGATCCCCCGGGTTTGGCCCACTAG  
ACGTTTAAACCAGATCACCAAGATAGAGGTACCTGGCCCCAGATCAGATCCATAGTGTGCGCTTGTACCTATGGGAAC  
CTTCTGGGCATCCTTCGTGGGCCTTACAACCTAGTGTTCGCACTACTACCAAAATCGGTAGGGACTAAGTATCTTCCACAAC  
ATCTCAGGGTCTCTGGGGCCAAAAGCCAAGGTTTAAACAAACCTTTAGGATTGGTTCTAAACCTGAGATGTTGTGGAAG  
ATACTTAGTACCTACCGATCTGGTAGTAGTGCAAAACACTAGTTGTAAGGCCACGAAGGATGCCAGAAGGTACCCATAG  
GTAACAAGCGACACTATGGATCTGATCTGGGGCCAGGTACCTCTATCTTGGTGATCTGGTTAAAAAACGTTCCAGTGGGCC  
AAACCCGGGGGGGATCCCCG

>SRR2298573.777443 777443 length=500

AATAAAAGGAAACCCGGGGATCCCCCGGGTTTGGCCCACTAGACGTTTAAACCAGATCACCAAGATAGAGGTACCTG  
GCCCCAGATCAGATCCATAGTGTGCGCTTGTACCTATGGGTACCTTCTGGGCATCCTTCGTGGGCCTTACAACCTAGTGT  
TGCACTACTACCAGATCGGTAGGTACTAAGTATCTTCCACAACATCTCAGGTTTAGAACCAATCCTAAAGGGGTTGTAA  
ACCTTGGCTTGGTAACAGGTGCTTCTGGGGCCAAAAGCCAAGGTTTAAACAAACCTTTAGGATTGGTTCTAAACCTGAGA  
TGTTGTGGAAGATACTTAGTACCTACCGATCTGGTAGTAGTGCAAAACACTAGTTGTAAGGCCACGAAGGATGCCAGAA  
GGTACCCATCGGTAACAAGAGACACTATGGATCGGATCTGGGGCCAGGTACCTCTATCTTGGGGATTCGGGTAAAAAACG

TCCAGTGGGCCAAAACCCGGG  
>SRR2298573.776393 776393 length=500  
AGCCAAGGTTTAAACAAACCCCTTAGGATTGGTTCTAAACCTGAGATGTTGTGGAAGATACTTATTACCTACCGATCTGGT  
AGTAGTGCAAACTAGTTGTAAGGCCACGAAGGATGCCAGAAAGGTACCCATAGGTAACAAGCGACACTATGGATCTG  
ATCTGGGGCCAGGTACCTCTATCTTGGTGATCTGGTTAAAAACGTCCTAGTGGGCCAAAACCCGGGGGGGATCCCCGGTTT  
CCTTTTATTTGACCACTCCGGTCGCCATATCTGCAATACTCTTAATTGTCTCCATAGTGGCATTGATAAAAAAAAAGGAA  
ACCGGGGATCCCCCGGGTTTGGCCCACTAGACGTTTTTTTAAACCAGATACCAAGATAGAGGTACCTGGCCCCAGATCA  
GATCCATAGTTTCCCTTGTACCAATGGGGACCTTCTGGGCATCCTTCGTGGGCCCTTACAACAAGGGTTTGCCTACTAC  
CAGACCGGTGGGAAATAAAA  
>SRR2298573.775045 775045 length=500  
ATACCATGCTTGTGGACCTTATGCTCACACAGCCATCCTCTAGTAAGTTTGTGAGACGTCTGGTGACGTGTGGGAACTTA  
TTGAAAACAACATTTTGTCTGTAAGCATCCTATTGCCAGCGGAACAACACCTGGTAACAGGTGCCTCTGGAGCCAAAAGC  
CAAGGTTTAAACAAACCCCTTAGGATTGGTTCTAAACCTGAGATGTTGTGGAAGATACTTAGTACCTACCGATCTGGTAGT  
AGTGCAAAACAAGATAGAGGTACCTGGCCCCAGATCAGATCCATAGTGTGCTTGTACCTATGGGTACCTTCTGGGCATC  
CTTCGTGGGCCCTTACAACCTAGTGTTCGACTACTACCAGATCGGTAGGTACTAAGTATCTTCCACAACATCTCAGGTTTA  
GAACCAATCCTAAAGGGTTTGTAAACCTTGGCTTTTGGCTCCAGAGGCACCTGTTACCAGGGGTGTCCCCCTGGCAA  
AGGAGGCTTTACAGCAAAAAG  
>SRR2298573.773302 773302 length=500  
GGCCAAAAGCCAAGGTTTAAACAAACCCCTTAGGATTGGTTCTAAACCTGAGATGTTGTGGAAGATACTTAGTACCTACCG  
ATCTGGTAGTAGTGCAAACTAGTTGTAAGGCCACGAAGGATGCCAGAAAGGTACCCATAGGTAACAAGCGACACTAT  
GGATCTGATCTGGGGCCAGGTACCTCTATCTTGGTGATCTGGTTAAAAAACGCCTAGTGGGCCAAAACCCGGGGGGGATCC  
CCGGTTTCTATAGTGGAAATCAACTGAACTGACCACTCCGGTCGCCATATCTGCAATACTCTTAATTGTCTCCATAGTGG  
CATTGATAAAAAAAAAGGAAACCGGGGATCCCCCGGGTTTGGCCCACTAGACGTTTTTTTAAACCAGATACCAAGATAG  
AGGTACCTGGCCCCAGATCAGATCCATAGTGTGCTTGTACCATGGGTACCTTCTGGGCACCTTCGTGGGCCCTTACA  
ACAAGGGTTTGCCTCTAC  
>SRR2298573.766703 766703 length=500  
CATCCTTCGTGGGCCCTTACAACCTAGTGTTCGACTACTACCAGATCGGTAGGTACTAAGTATCTTCCACAACATCTCAGG  
TTTAGAACCAATCCTAAAGGGTTTGTAAACCTTGGCTTTTGGCCCCAGAGGCACCTGTTACCAGGTGTTGTTCCGCTGG  
CAATAGGATGCTTTACAGCAAAAATGTTGTTTCCAATAAGTTCCACACGTCACCAGACGTCTCACAAACTTACTAAAAGGA  
TGGCTGGGTGGATAACCATGCTTGTGGACCTTATGCTCACACAGCCATCCTCTAGTAAGTTTGTGAGACGTCTGGTGACGT  
GTGGGAACTTATTGGAAACAACATTTTGTCTGTAAGCATCCTATTGCCAGCGGAACAACACCTGGTAACAGTTGCCTCTG  
GGGCCAAAAGCCAAGGTTTAAACAAACCCCTTAGGATTGGTTCTAAACCTGAGATGTTGGGGAAGAAACTTAGTACCTACC  
GATCTGGGAGTAGTGCAAAAC  
>SRR2298573.762593 762593 length=500  
CTCTGGGGCCAAAAGCCAAGGTTTAAACAAACCCCTTAGGATTGGTTCTAAACCTGAGATGTTGTGGAAGATACTTAGTAC  
CTACCGATCTGGTAGTAGTGCAAACTAGTTGTAAGGCCACGAAGGATGCCAGAAAGGTACCCATAGGTAACAAGCGA  
CACTATGGATCTGATCTGGGGCCAGGTACCTCTATCTTGGTGATCTGGTTAAAAAACGTCCTAGTGGGCCAAAACCCGGGGG  
GGTTCCCCGGCCATAGTGGCATTGATAAAAAAAAAGGAAACCGGGGATCCCCCGGGTTTGGCCCACTAGACGTTTTTTT  
AACCAGATCACCAAGATAGAGGTACCTGGCCCCAGATCAGATCCATAGTGTGCTTGTACCTATGGGTACCTTCTGGGC  
ATCCTTCGTGGGCCTTACAACCTAGGGTTTGCCTACTACCAGATCGGAAGGGACTAAGTATCTTCCACAACACTCCAGGT  
TTTGAACAAATCCTAAAGGG  
>SRR2298573.761206 761206 length=500  
AAATAAAAGGAAACCGGGGATCCCCCGGGTTTGGCCCACTAGACGTTTTTTTAAACCAGATACCAAGATAGAGGTACCT  
GGCCCCAGATCAGATCCATAGTGTGCTTGTACCTATGGGTACCTTCTGGGCATCCTTCGTGGGCCCTTACAACCTAGTGT  
TTGCACTACTACCAGATCGGTAGGTACTAAGAACTTCCACAACATCTCAGGTTTLAGAACCAATCCTAAAGGGTTTGTTA  
AACCTTGGCTGTGGGAACTTATTGGAAACAACATTTTGTCTGTAAGCATCCTATTGCCAGCGGAACAACACCTGGTAACA  
GGTGCCTCTGGGGCCAAAAGCCACGGTTTAAACAAACCCCTTAGGATTGGTTCTAAACCTGAGATGTTGTGGAAGAAACTT  
AGTACCTACCGATCTGGTGGCAGTGCAAAACAAAGTTGTAAGGCCACGAAGAATGCCCCGAAGGTACCCCCAAGGGAAAA  
AGCGCAACCTTGGACCTGAA  
>SRR2298573.755061 755061 length=500  
ATCCTATTGCCAGCGGAACAACACCTGGTAACAGGTGCCTCTGGGGCCAAAAGCCAAGGTTTAAACAAACCCCTTAGGATT  
GGTTCTAAACCTGAGATGTTGTGGAAGATACTTAGTACCTACCGATCTGGTAGTAGTGCAAACTAGTTGTAAGGCCCA  
CGAAGGATGCCAGAAAGGAACCCATAGGTAACAAGCGACACTATGGATCTGATCTGGGGCCAGGAACCTCTATCTTGGTG  
ATCTGGTTAAACATTAACCTACATTGATAGTGGAAATCAACTGAACTGACCACTCCGGTCGCCATATCTGCAATACTCTTAAT  
TGTCTCCATAGTGGCATTGATAAAAAAAAAGGAAACCGGGGATCCCCCGGGTTTGGCCCACTAGACGTTTTTTTAAACCA  
GATCACCAAGATAGAGGTACCTGGCCCCAGATCAGATCCATAGTGTGCTTGTACCTATGGGTACCTTCTGGGCACCT  
CCTGGGGCCTTACACCTAGG  
>SRR2298573.744959 744959 length=500  
CCATAGTGTGCTTGTTCCTATGGGTACCTTCTGGGCATCCTTCGTGGGCCCTTACAACCTAGTGTTCGACTACTACCAG

ATCGGTAGGTACTAAGTATCTTCCACAACATCTCAGGTTTAGAACCAATCCTAAAAGGGTTTGTAAACCTTGGCTTTTGG  
CCCCAGAGGCACCTGTTACCAGGTGTTGTTCCGCTGGCAATAGGATGCTTTACAGCAAAATGTTGTTTCCAATAAGTTCC  
CACACGTCACGCTCTATTAGTGAGATAACCATGCTTGTGGACCTTATGCTCACACAGCCATCCTCTAGTAAGTTTGTGAGA  
CGTCTGGTGACGTGTGGGAACCTTATTGGAAACAACATTTTGTCTGTAAAGCATCCTATTGCCAGCGGAACAACACCTGGTA  
ACAGGTGCCTCTGGGGCCAAAAGCCAAGGTTTAAACAAACCTTTAGGATTGGTTCTAAACCTGGGAAGTTGTGGAAGAAA  
CTAAGTACCTACCGAACTGG

>SRR2298573.742876 742876 length=500

CCTTATGCTCACACAGCCATCCTCTAGTAAGTTTGTGAGACGCTCTGGTGACGTGTGGGAACCTTATTGGAAACAACATTTT  
GCTGTAAAGCATCCTATTGCCAGCGGAACAACACCTGGTAACAGGTGCCTCTGGGGCCAAAAGCCAAGGTTTAAACAAACC  
CTTTAGGATTGGTTCTAAACCTGAGATGTTGTGGAAGATACTTAGTACCTACCGTTCTGGTAGTAGTGCAAACCTAGTT  
GTAAGGCCCAGGTACCTTCTGGGCATCCTTTCGTGGGCCTTACAACAGTGTGTTGCACTACTACCAGATCGGTAGGTACTA  
AGTATCTTCCACAACATCTCAGGTTTAGAACCAATCCTAAAAGGGTTTGTAAACCTTGGCTTTTTTGGCCAGAGGCACCT  
GTTACCAGGGGTTGTTCCGCTGGCAATAGGATGCTTTACAGCAAAAAGTTGTTTCCAATAAGTTCCCCCCCGTCACCAAA  
CGGCCACAACTAACCAAA

>SRR2298573.738145 738145 length=500

GGCGTGCCATAGTCTATTAGTGAGATAACCATGCTTGTGGACCTTATGCTCACACAGCCATCCTCTAGTAAGTTTGTGAG  
ACGCTCTGGTGACGTGTGGGAACCTTATTGGAAACAACATTTTGTCTGTAAAGCATCCTATTGCCAGCGGAACAACACCTGGT  
AACAGGTGCCTCTGGGGCCAAAAGCCAAGGTTTAAACAAACCTTTAGGATTGGTTCTAAACCTGAGATGTTGTGGAAGAT  
ACTTAGTACCGTACTAAGTATCTTCCACAACATCTCAGGTTTAGAACCAATCCTAAAAGGGTTTGTAAACCTTGGCTTTTT  
GGCCCCAGAGGCACCTGTTACCAGGTGTTGTTCCGCTGGCAATAGGATGCTTTACAGCAAAAATGTTGTTTCCAATAAGTT  
CCCACACGTCACCAGACGCTCTCACAAACTTACTAGAGGATGGCTGTGTGAGCATAAGGTCCCCAACAGGGGATCCCCCA  
AAAAGAGCTATGGCACCCCC

>SRR2298573.728669 728669 length=500

TACAACCTAGTGTGTTGCACTACTACCAGATCGGTAGGTACTAAGTATCTTCCACAACATCTCAGGTTTAGAACCAATCCTA  
AAGGTTTGTAAACCTTGGCTTTTGGCCCCAGAGGCACCTGTTACCAGGTGTTGTTCCGCTGGCAATAGGATGCTTTAC  
AGCAAAAATGTTGTTTCCAATAAGTTCCACACGTCACCAGAAGTCTCCCAAACTTACTAAAGGATGGCTGGTTGGGCTAA  
AGGTCCCCAACTATTAGTGAGATAACCATGCTTGTGGACCTTATGCTCACACAGCCATCCTCTAGTAAGTTTGTGAGACGT  
CTGGTGACGTGTGGGAACCTTATTGGAAACAACATTTTGTCTGTAAAGCATCCTATTGCCAGCGGAACAACACCTGGTAACA  
GGTGCCTCTGGGGCCAAAAGCCAAGGTTTAAACAAACCTTTAGGATTGGTTCTAAACCTGCGATGTTGTGGAAGATACTT  
AGTACCTACCGATCTGGTAG

>SRR2298573.726823 726823 length=500

GGTAACAGGTGCCTCTGGGGCCAAAAGCCAAGGTTTAAACAAACCTTTAGGATTGGTTCTAAACCTGAGATGTTGTGGA  
GATACTTAGTACCTACCGATCTGGTAGTAGTGCAAACACTAGTTGTAAGGCCACGAAGGATGCCAGAAGGTACCCATA  
GGTAACAAGCGACACTATGGATCTGATCTGGGGCCAGGTACCTCTATCTTGGTGATCTGGTTAAAAAACGCTATTGGGC  
CAAACCCCTGGGGTTTGGCCACTAGACGTTTTTTTAAACCAGATCACCAGATAGAGGTACCTGGCCCCAGATCAGATCCA  
TAGTGTCGCTTGTACCTATGGGTACCTTCTGGGCATCCTTCGTGGGCCCTTACAACCTAGTGTGTTGCACTACTACCAGATC  
GGTAGGTACTAAGTATCTTCCACAACATCTCAGGTTTAGAACCAATCCTAAAAGGGTTTGTAAACCTTGGCTTTTTGGCCC  
CAGAGGCACCTGTTACCCGG

>SRR2298573.724976 724976 length=500

GTACTACATCTTTGTTCTCTGGTTTCAGCTGTTGTAGCATAGCAATTTGGTCCGAGCACATTAGAAGCATCATCTGCAACT  
TTGGTTAATAAAATACCTCCAATTTCACTACCTTCCACTCTCTCATTAACCTACATTTGATAGTGGAAATCAACTGAA  
CTGACCACTCCGGTCGCCATATCTGCAATACTCTTAATTTGTCTCCATAATGGCATTGATAAAAATAAAAGGAAACCGGGGA  
TCCCCCGGCTTTAGGATTGGTTCTAAACCTGAGATGTTGTGGAAGATACTTAGTACCTACCGATCTGGTAGTAGTGCA  
AACACTAGTTGTAAGGCCACGAAGGATGCCAGAAGGTACCCATAGGTAACAAGCGACACTATGGATCTGATCTGGGGC  
CAGGTACCTCTATCTTGGTGATCTGGTTAAAAAACGCTCTAGTGGGCCAAAACCCGGGGGGGATCCCCGGTTTTCTTTTATT  
TTATCAATGCCACTATGGAG

>SRR2298573.724601 724601 length=500

ACATTTTGTCTGTAAAGCATCCTATTGCCAGCGGAACAACACCTGGTAACAGGTGCCTCTGGGGCCAAAAGCCAAGGTTTA  
ACAAACCTTTAGGATTGGTTCTAAACCTGAGATGTTGTGGAAGATACTTAGTACCTACCGATCTGGTAGTAGTGCAAAC  
ACTAGTTGTAAGGCCACGAAGGATGCCAGAAGGTACCCAAAGGTAACAAGGAAACTATGGATCGGATCTGGGGCCAG  
GAACCTCTATCTACATTTGATAGTGGAAATCAACTGAACTGACCACTCCGGTCGCCATATCTGCAATACTCTTAATTTGTCTC  
CATAGTGGCATTGATAAAAATAAAAGGAAACCGGGGATCCCCCGGGTTTGGCCACTAGACGTTTTTTTAAACCAGATCAC  
CAAGATAGAGGTACCTGGCCCCAGATCAGATCCATAGTGTGCTTGTACCTATGGGTACCTTCTGGGCATCCTTCGTG  
GCCTTACAACCTAGTGTGTTGC

>SRR2298573.714736 714736 length=500

AATAAAAAGGAAACCGGGGATCCCCCGGGTTTGGCCACTAGACGTTTTTTTAAACCAGATCACCAGATAGAGGTACCTG  
GCCCCAGATCAGATCCATAGTGTGCTTGTAACTATGGGTACCTTCTGGGCATCCTTCGTGGGCCTTACAACCTAGTGT  
TGCACTACTACCAGATCGGTAGGTACTAAGTATCTTCCACAACATCTCAGGTTTAGAACCAATCCTAAAAGGGTTTGTAA  
ACCTTGGCTTGTCTTATGTTTACACAGCCATCCTCTAGTAAGTTTGTGAGACGCTCTGGTGACGTGTGGGAACCTTATTGGA

AACAACATTTTGTCTGTAAGCATCCTATTGCCAGCGGAACAACACCTGGTAACAGGTGCCTCTGGGGCCAAAAGCCAAGG  
TTTAAACAAAACCTTTAGGCTGGGTCTAACCCCTGAGAGGTTGTGGAAGAAAACCTTAGTACCTACCGAGCTGGTAGCGGGGA  
AAACACAAGTGTTAAGGCC

>SRR2298573.708314 708314 length=500

CAACTGAACTGACCACTCCGGTCGCCATATCTGCAATACTCTTAATTGTCTCCATAGTGGCATTGATAAAAATAAAAGGAA  
ACCGGGGATCCCCCGGGTTTGGCCACTAGACGTTTTTTAACCAGATACCAAGATAGAGGTACCTGGCCCCAGATCA  
GATCCATAGTGTCTGCTTGTACCTATGGGTACCTTCTGGGCATCCTTCGTGGGCCCTTACAACACTAGTGTGTTGACCTACAAC  
CAGAACGGTGGGTAACAGGTGCCCTCTGGGGCCAAAAGCCAAGGTTTAAACAAAACCTTTAGGATTGGTCTTAAACCTGAGA  
TGTTGTGGAAGATACTTAGTACCTACCGATCTGGTAGTAGTGCAAACACTAGTTGTAAGGCCACGAAGGATGCCAGAA  
GGTACCCATAGGTAACAAGCGACACTATGGATCTGATCTGGGGCCAGGTACCTCTATCTTGGTGATCTGGTTAAAAAACG  
GCTAGTGGGCCAAAACCCGGG

>SRR2298573.705806 705806 length=500

ACACCTGGTAACAGGTGCCTCTGGGGCCAAAAGCCAAGGTTTAAACAAAACCTTTAGGATTGGTCTTAAACCTGAGATGTT  
GTGGAAGATACTTAGTACCTACCGATCTGGTAGTAGTGCAAACACTAGTTGTAAGGCCACGAAGGATGCCAGAAAGGTA  
CCCATAGGTAACAAGCGACACTATGGATCTGATCTGGGGCCAGGTACCTCTATCTTGGTGAACCTGGGTAAAAAACGTCTA  
GTGGGCCAAAAGACCACTCCGGTCGCCATATCTGCAATACTCTTAATTGTCTCCATAGTGGCATTGATAAAAATAAAAGGAA  
ACCGGGGATCCCCCGTGTGTTGGCCACTAGACGTTTTTTAACCAGATACCAAGATAGAGGTACCTGGCCCCAGATCA  
GATCCATAGTGCCGCTTGTACCTATGGGTACCTTCTGGGCATCCTTCGTGGGCCCTTACAACCTCTGGTTTGACCTCCACC  
CAGATCGGTAGGTACTAAGA

>SRR2298573.700830 700830 length=500

ATCCTATTGCCAGCGGAACAACACCTGGTAACAGGTGCCTCTGGGGCCAAAAGCCAAGGTTTAAACAAAACCTTTAGGATT  
GGTCTTAAACCTGAGATGTTGTGGAAGATACTTAGTACCTACCGATCTGGTAGTAGTGCAAACACTAGTTGTAAGGCCCA  
CGAAGGATGCCAGAAAGGTACCCATAGGTAACAAGCGACACTATGGATCTGATCTGGGGCCAGGGACCTCTATCTTGGGG  
ATCTGGTTAACACTAGACGTTTTTTAACCAGATACCAAGATAGAGGTACCTGGCCCCAGATCAGATCCATAGAGTGCCT  
TGTTACCTATGGGTACCTTCTGGGCATCCTTCGTGGGCCCTTACAACACTAGTGTGTTGCACTACTACCAGATCGGTAGGTACT  
AAGTATCTTCCACAACATCTCAGGTTTAGAACCAATCCTAAAGGGATTGTTAAACCTTGGCTTTTGGCCCCAAAAGGCACC  
TGTTACCAGGGGTGGTTCCC

>SRR2298573.696366 696366 length=500

GCAATACTCTTAATTGTCTCCATAGTGGCATTGATAAAAATAAAAGGAAAACCGGGGATCCCCCGGGTTTGGCCACTAG  
ACGTTTTTTAACCAGATACCAAGATAGAGGTACCTGGCCCCAGATCAGATCCATAGTGTCTGCTTGTACCTATGGGTAC  
CTTCTGGGCATCCTTCGTGGGCCCTTAAAACACTAGTGTGTTGCACTACTACCAGATCGGTAGGAACTAAGAATCTTCCACAAC  
ATCTCAGGTTCTTTAGGATTGGTCTTAAACCTGAGATGTTGTGGAAGATACTTAGTACCTACCGATCTGGTAGTAGTGCA  
AACACTAGTTGTAAGGCCACGAAGGATGCCAGAAAGGTACCCATAGGTAACAAGCGACACTATGGATCTGATCTGGGGC  
CAGGTACCTCTATCTTGGTGATCTGGTTAAAAAACGTCTAGTGGGCCAAAACCCGGGGGGATCCCCGGTTTCTTTTAT  
TTATCAATGCCACTATGGAG

>SRR2298573.688563 688563 length=500

GGTAACAGGTGCCTCTGGGGCCAAAAGCCAAGGTTTAAACAAAACCTTTAGGATTGGTCTTAAACCTGAGATGTTGTGGAA  
GATACTTAGTACCTACCGATCTGGTAGTAGTGCAAACACTAGTTGTAAGGCCACGAAGGATGCCAGAAAGGTACCCATA  
GGTAACAAGCGACACTATGGATCTGATCTGGGGCCAGGTACCTCTATCTTGGGGATCTGGTTAAAAAACGTCTAGTGGGC  
CAAACCCGGGCTCATTAACCTACATTTGATAGTGGAACTCAACTGAACTGACCACTCCGGTCGCCATATCTGCAATACTCTTA  
ATTGTCTCCATAGTGGCATTGATAAAAATAAAAGGAAAACCGGGGATCCCCCGGGTTTGGCCACTAGACGTTTTTTAACC  
CAGATACCAAGATAGAGGAACCTGGCCCCAGATCAGATCCATAGTGTCTGCTTGTACCAAAGGGTACCTTCTGGGCATC  
CTTCGGGGGCCCTTACAACCTA

>SRR2298573.685978 685978 length=500

CCCTTTAGGATTGGTCTTAAACCTGAGATGTTGTGGAAGATACTTAGTACCTACCGATCTGGTAGTAGTGCAAACACTAG  
TTGTAAGGCCACGAAGGATGCCAGAAAGGTACCCATAGGTAACAAGCGACACTATGGATCTGATCTGGGGCCAGGTACC  
TCTATCTTGGTGATCTGGTTAAAAAACGTCTAGTGGGGCCAAAACCCGGGGGGATCCCCGGTTTCTTTTATTTATCAAT  
GCCACTATGGCTCTTAATTGTCTCCATAGTGGCATTGATAAAAATAAAAGGAAAACCGGGGATCCCCCGGGTTTGGCCCA  
CTAGACGTTTTTTAACCAGATACCAAGATAGAGGTACCTGGCCCCAGATCAGATCCATAGTGTCTGCTTGTACCTATGG  
GTACCTTCTGGGCATCCTTCGTGGGCCCTTACAACACTAGTGTGTTGCACTACTACCAGATCGGTAGGTACTAAGAATCTTCCA  
CAACATCCAGGTTTAGAAC

>SRR2298573.685074 685074 length=500

GGTAACAGGTGCCTCTGGGGCCAAAAGCCAAGGTTTAAACAAAACCTTTAGGATTGGTCTTAAACCTGAGATGTTGTGGAA  
GATACTTAGTACCTACCGATCTGGTAGTAGTGCAAACACTAGTTGTAAGGCCAACGAAGGATGCCAGAAAGGTACCCATA  
GGTAACAAGCGACACTATGGATCTGATCTGGGGCCAGGTACCTCTATCTTGGTGATCTGGTTAAAAAACGTCTAGTGGGC  
CAAACCCGGGCTCATTAACCTACATTTGATAGTGGAACTCAACTGAACTGACCACTCCGGTCGCCATATCTGCAATACTCTTA  
ATTGTCTCCATAGTGGCATTGATAAAAATAAAAGGAAAACCGGGGATCCCCCGGGTTTGGCCACTAGACGTTTTTTAACC  
CAGATACCAAGATAGAGGTACCTGGCCCCAGATCAGATCCATAGAGTGTCTGCTTGTACCTATGGGAACCTTCTGGGAATC  
CCTCGTTGGCCTTACACCTG

>SRR2298573.682861 682861 length=500

CCATAGTGGCATTGATAAAAATAAAAAGGAAACCGGGGATCCCCCGGGTTTGGCCCACTAGACGTTTTTTAACCAGATCA  
CCAAGATAGAGGTACCTGGCCCCAGATCAGATCCATAGTGTGCTTGTACCTATGGGTACCTTCTGGGCATCCTTCGTG  
GGCCTTACAAC TAGTGTTC GCACTACTACCAGATCGGTAGGTACTAAGTATCTTCCACAACATCTCAGGTTTAGAACCAA  
TCCTAAAGGGGCATCCTATTGCCAGCGGAACAACACCTGGTAACAGGTGCCTCTGGGGCCAAAAGCCAAGGTTTAACAAA  
CCCTTAGGATTGGTTCTAAACCTGAGATGTTGTGGAAGATACTTAGTACCTACCGATCTGGTAGTAGTGCAAACACTAG  
TTGTAAGGCCACGAAGGATGCCCAGAAGGTACCCATAGGTAACAAGAGAAACAATGGATCTGACATGGGGCCAGGGACC  
TCTATCTTGGGGATCTGGTA
