# Supplementary material
Source: PubMed Central journal article supplement (PMC5877943)
Supplement: pnas.1721117115.sd05.pdf [file pnas.1721117115.sd05.pdf]

## Supplementary Dataset 5: Identification of GIV in human enteric virome.

The data for this analysis was obtained from NCBI (SRA ID: PRJEB9524) and the name of the project is “Expanded Enteric Virome and Altered Bacterial Microbiome in Acquired Immunodeficiency Syndrome”. We report the BlastN reads that show a significant alignment with GIV sequences. No significant hits were identified for LCDV-1, LCDV-Sa and SGIV in this dataset. Human herpes virus and human parechovirus were used as controls. The full length reads that gave a significant hit for GIV are reported at the end of the document.

### 1- LCDV-1

Query= NC\_001824.1 Lymphocystis disease virus 1, complete genome

Length=102653

\*\*\*\*\* No hits found \*\*\*\*\*

|        |       |      |
|--------|-------|------|
| Lambda | K     | H    |
| 1.33   | 0.621 | 1.12 |

Gapped

|        |       |       |
|--------|-------|-------|
| Lambda | K     | H     |
| 1.28   | 0.460 | 0.850 |

Effective search space used: 3555459874123716

### 2- LCDV-Sa

Query= NC\_033423.1 Lymphocystis disease virus Sa isolate SA9, complete genome

Length=208501

\*\*\*\*\* No hits found \*\*\*\*\*

|        |       |      |
|--------|-------|------|
| Lambda | K     | H    |
| 1.33   | 0.621 | 1.12 |

Gapped

|        |       |       |
|--------|-------|-------|
| Lambda | K     | H     |
| 1.28   | 0.460 | 0.850 |

Effective search space used: 7222974216769428

### 3- SGIV

Query= NC\_006549.1 Singapore grouper iridovirus, complete genome

Length=140131

\*\*\*\*\* No hits found \*\*\*\*\*

|        |       |      |
|--------|-------|------|
| Lambda | K     | H    |
| 1.33   | 0.621 | 1.12 |

Gapped

|        |       |       |
|--------|-------|-------|
| Lambda | K     | H     |
| 1.28   | 0.460 | 0.850 |

Effective search space used: 4854030489852648

#### 4- GIV

Query= AY666015.1 Grouper iridovirus, complete genome

Length=139793

| Sequences producing significant alignments: |                                                     | Score<br>(Bits) | E<br>Value |
|---------------------------------------------|-----------------------------------------------------|-----------------|------------|
| ERR906905.742751                            | M02084:90:000000000-A7T3A:1:2110:20426:18954 le...  | 58.4            | 0.013      |
| ERR906885.2244768                           | M02084:91:000000000-A7W9J:1:2114:17207:13415 l...   | 54.7            | 0.17       |
| ERR906885.2203683                           | M02084:91:000000000-A7W9J:1:2113:24533:24731 l...   | 54.7            | 0.17       |
| ERR906885.1850226                           | M02084:91:000000000-A7W9J:1:2109:25426:14398 l...   | 54.7            | 0.17       |
| ERR906885.1828124                           | M02084:91:000000000-A7W9J:1:2109:13171:8089 le...   | 54.7            | 0.17       |
| ERR906885.1819688                           | M02084:91:000000000-A7W9J:1:2109:18814:5163 le...   | 54.7            | 0.17       |
| ERR906885.1682157                           | M02084:91:000000000-A7W9J:1:2107:23505:11935 l...   | 54.7            | 0.17       |
| ERR906885.1649071                           | M02084:91:000000000-A7W9J:1:2106:16306:25589 l...   | 54.7            | 0.17       |
| ERR906885.1470376                           | M02084:91:000000000-A7W9J:1:2104:23038:17943 l...   | 54.7            | 0.17       |
| ERR906885.1205856                           | M02084:91:000000000-A7W9J:1:2101:10413:8955 le...   | 54.7            | 0.17       |
| ERR906885.953376                            | M02084:91:000000000-A7W9J:1:1112:15459:10728 le...  | 54.7            | 0.17       |
| ERR906885.826463                            | M02084:91:000000000-A7W9J:1:1110:20305:22825 le...  | 54.7            | 0.17       |
| ERR906885.727798                            | M02084:91:000000000-A7W9J:1:1109:16955:19655 le...  | 54.7            | 0.17       |
| ERR906885.636438                            | M02084:91:000000000-A7W9J:1:1108:25604:18310 le...  | 54.7            | 0.17       |
| ERR906885.530816                            | M02084:91:000000000-A7W9J:1:1107:25356:13148 le...  | 54.7            | 0.17       |
| ERR906885.440867                            | M02084:91:000000000-A7W9J:1:1106:11143:11898 le...  | 54.7            | 0.17       |
| ERR906885.428722                            | M02084:91:000000000-A7W9J:1:1106:12479:8491 len...  | 54.7            | 0.17       |
| ERR906885.392433                            | M02084:91:000000000-A7W9J:1:1105:6027:21122 len...  | 54.7            | 0.17       |
| ERR906885.343180                            | M02084:91:000000000-A7W9J:1:1105:10075:7527 len...  | 54.7            | 0.17       |
| ERR906885.238296                            | M02084:91:000000000-A7W9J:1:1103:7132:24731 len...  | 54.7            | 0.17       |
| ERR906885.234443                            | M02084:91:000000000-A7W9J:1:1103:25222:23417 le...  | 54.7            | 0.17       |
| ERR906885.182286                            | M02084:91:000000000-A7W9J:1:1103:13366:8684 len...  | 54.7            | 0.17       |
| ERR906885.79644                             | M02084:91:000000000-A7W9J:1:1101:16781:27216 len... | 54.7            | 0.17       |
| ERR906885.2018374                           | M02084:91:000000000-A7W9J:1:2111:20336:17036 l...   | 52.8            | 0.61       |

>ERR906905.742751 M02084:90:000000000-A7T3A:1:2110:20426:18954 length=500  
Length=500

Score = 58.4 bits (31), Expect = 0.013

Identities = 31/31 (100%), Gaps = 0/31 (0%)  
Strand=Plus/Plus

Query 1320 CTCCTGGGGCTCCTGGGGCTCCTGGGGCTCT 1350  
|||||  
Sbjct 196 CTCCTGGGGCTCCTGGGGCTCCTGGGGCTCT 226

Score = 52.8 bits (28), Expect = 0.61  
Identities = 28/28 (100%), Gaps = 0/28 (0%)  
Strand=Plus/Minus

Query 1323 CTGGGGCTCCTGGGGCTCCTGGGGCTCT 1350  
|||||  
Sbjct 353 CTGGGGCTCCTGGGGCTCCTGGGGCTCT 326

>ERR906885.2244768 M02084:91:000000000-A7W9J:1:2114:17207:13415 length=500  
Length=500

Score = 54.7 bits (29), Expect = 0.17  
Identities = 29/29 (100%), Gaps = 0/29 (0%)  
Strand=Plus/Minus

Query 70867 ATAACGTATATTATAAAATGTAATAATGT 70895  
|||||  
Sbjct 166 ATAACGTATATTATAAAATGTAATAATGT 138

Score = 54.7 bits (29), Expect = 0.17  
Identities = 29/29 (100%), Gaps = 0/29 (0%)  
Strand=Plus/Plus

Query 70867 ATAACGTATATTATAAAATGTAATAATGT 70895  
|||||  
Sbjct 415 ATAACGTATATTATAAAATGTAATAATGT 443

>ERR906885.2203683 M02084:91:000000000-A7W9J:1:2113:24533:24731 length=500  
Length=500

Score = 54.7 bits (29), Expect = 0.17  
Identities = 29/29 (100%), Gaps = 0/29 (0%)  
Strand=Plus/Plus

Query 70867 ATAACGTATATTATAAAATGTAATAATGT 70895  
|||||  
Sbjct 41 ATAACGTATATTATAAAATGTAATAATGT 69

Score = 54.7 bits (29), Expect = 0.17  
Identities = 29/29 (100%), Gaps = 0/29 (0%)  
Strand=Plus/Minus

Query 70867 ATAACGTATATTATAAAATGTAATAATGT 70895  
|||||  
Sbjct 468 ATAACGTATATTATAAAATGTAATAATGT 440

>ERR906885.1850226 M02084:91:000000000-A7W9J:1:2109:25426:14398 length=500  
Length=500

Score = 54.7 bits (29), Expect = 0.17  
Identities = 29/29 (100%), Gaps = 0/29 (0%)  
Strand=Plus/Plus

Query 70867 ATAACGTATATTATAAAATGTAAAAAATGT 70895  
|||||  
Sbjct 284 ATAACGTATATTATAAAATGTAAAAAATGT 312

>ERR906885.1828124 M02084:91:000000000-A7W9J:1:2109:13171:8089 length=500  
Length=500

Score = 54.7 bits (29), Expect = 0.17  
Identities = 29/29 (100%), Gaps = 0/29 (0%)  
Strand=Plus/Minus

Query 70867 ATAACGTATATTATAAAATGTAAAAAATGT 70895  
|||||  
Sbjct 175 ATAACGTATATTATAAAATGTAAAAAATGT 147

>ERR906885.1819688 M02084:91:000000000-A7W9J:1:2109:18814:5163 length=500  
Length=500

Score = 54.7 bits (29), Expect = 0.17  
Identities = 29/29 (100%), Gaps = 0/29 (0%)  
Strand=Plus/Minus

Query 70867 ATAACGTATATTATAAAATGTAAAAAATGT 70895  
|||||  
Sbjct 205 ATAACGTATATTATAAAATGTAAAAAATGT 177

>ERR906885.1682157 M02084:91:000000000-A7W9J:1:2107:23505:11935 length=500  
Length=500

Score = 54.7 bits (29), Expect = 0.17  
Identities = 29/29 (100%), Gaps = 0/29 (0%)  
Strand=Plus/Plus

Query 70867 ATAACGTATATTATAAAATGTAAAAAATGT 70895  
|||||  
Sbjct 169 ATAACGTATATTATAAAATGTAAAAAATGT 197

>ERR906885.1649071 M02084:91:000000000-A7W9J:1:2106:16306:25589 length=500  
Length=500

Score = 54.7 bits (29), Expect = 0.17  
Identities = 29/29 (100%), Gaps = 0/29 (0%)  
Strand=Plus/Minus

Query 70867 ATAACGTATATTATAAAATGTAAAAAATGT 70895  
|||||  
Sbjct 170 ATAACGTATATTATAAAATGTAAAAAATGT 142

Score = 54.7 bits (29), Expect = 0.17  
Identities = 29/29 (100%), Gaps = 0/29 (0%)  
Strand=Plus/Plus

Query 70867 ATAACGTATATTATAAAATGTAAAAAATGT 70895  
|||||  
Sbjct 438 ATAACGTATATTATAAAATGTAAAAAATGT 466

>ERR906885.1470376 M02084:91:000000000-A7W9J:1:2104:23038:17943 length=500  
Length=500

Score = 54.7 bits (29), Expect = 0.17  
Identities = 29/29 (100%), Gaps = 0/29 (0%)  
Strand=Plus/Minus

Query 70867 ATAACGTATATTATAAAATGTAAAAAATGT 70895  
|||||  
Sbjct 210 ATAACGTATATTATAAAATGTAAAAAATGT 182

Score = 54.7 bits (29), Expect = 0.17  
Identities = 29/29 (100%), Gaps = 0/29 (0%)  
Strand=Plus/Plus

Query 70867 ATAACGTATATTATAAAATGTAAAAAATGT 70895  
|||||  
Sbjct 444 ATAACGTATATTATAAAATGTAAAAAATGT 472

>ERR906885.1205856 M02084:91:000000000-A7W9J:1:2101:10413:8955 length=500  
Length=500

Score = 54.7 bits (29), Expect = 0.17  
Identities = 29/29 (100%), Gaps = 0/29 (0%)  
Strand=Plus/Plus

Query 70867 ATAACGTATATTATAAAATGTAAAAAATGT 70895  
|||||  
Sbjct 404 ATAACGTATATTATAAAATGTAAAAAATGT 432

>ERR906885.953376 M02084:91:000000000-A7W9J:1:1112:15459:10728 length=500  
Length=500

Score = 54.7 bits (29), Expect = 0.17  
Identities = 29/29 (100%), Gaps = 0/29 (0%)  
Strand=Plus/Minus

Query 70867 ATAACGTATATTATAAAATGTAAAAAATGT 70895  
|||||  
Sbjct 109 ATAACGTATATTATAAAATGTAAAAAATGT 81

Score = 54.7 bits (29), Expect = 0.17  
Identities = 29/29 (100%), Gaps = 0/29 (0%)  
Strand=Plus/Plus

Query 70867 ATAACGTATATTATAAAATGTAAAAAATGT 70895  
|  
Sbjct 294 ATAACGTATATTATAAAATGTAAAAAATGT 322

>ERR906885.826463 M02084:91:000000000-A7W9J:1:1110:20305:22825 length=500  
Length=500

Score = 54.7 bits (29), Expect = 0.17  
Identities = 29/29 (100%), Gaps = 0/29 (0%)  
Strand=Plus/Plus

Query 70867 ATAACGTATATTATAAAATGTAAAAAATGT 70895  
|  
Sbjct 279 ATAACGTATATTATAAAATGTAAAAAATGT 307

>ERR906885.727798 M02084:91:000000000-A7W9J:1:1109:16955:19655 length=500  
Length=500

Score = 54.7 bits (29), Expect = 0.17  
Identities = 29/29 (100%), Gaps = 0/29 (0%)  
Strand=Plus/Plus

Query 70867 ATAACGTATATTATAAAATGTAAAAAATGT 70895  
|  
Sbjct 253 ATAACGTATATTATAAAATGTAAAAAATGT 281

>ERR906885.636438 M02084:91:000000000-A7W9J:1:1108:25604:18310 length=500  
Length=500

Score = 54.7 bits (29), Expect = 0.17  
Identities = 29/29 (100%), Gaps = 0/29 (0%)  
Strand=Plus/Plus

Query 70867 ATAACGTATATTATAAAATGTAAAAAATGT 70895  
|  
Sbjct 26 ATAACGTATATTATAAAATGTAAAAAATGT 54

Score = 54.7 bits (29), Expect = 0.17  
Identities = 29/29 (100%), Gaps = 0/29 (0%)  
Strand=Plus/Minus

Query 70867 ATAACGTATATTATAAAATGTAAAAAATGT 70895  
|  
Sbjct 441 ATAACGTATATTATAAAATGTAAAAAATGT 413

>ERR906885.530816 M02084:91:000000000-A7W9J:1:1107:25356:13148 length=500  
Length=500

Score = 54.7 bits (29), Expect = 0.17  
Identities = 29/29 (100%), Gaps = 0/29 (0%)  
Strand=Plus/Minus

Query 70867 ATAACGTATATTATAAAATGTAAAAAATGT 70895  
|

Sbjct 122 ATAACGTATATTATAAAATGTAAAAAATGT 94

Score = 54.7 bits (29), Expect = 0.17  
Identities = 29/29 (100%), Gaps = 0/29 (0%)  
Strand=Plus/Plus

Query 70867 ATAACGTATATTATAAAATGTAAAAAATGT 70895  
|||||  
Sbjct 397 ATAACGTATATTATAAAATGTAAAAAATGT 425

>ERR906885.440867 M02084:91:000000000-A7W9J:1:1106:11143:11898 length=500  
Length=500

Score = 54.7 bits (29), Expect = 0.17  
Identities = 29/29 (100%), Gaps = 0/29 (0%)  
Strand=Plus/Minus

Query 70867 ATAACGTATATTATAAAATGTAAAAAATGT 70895  
|||||  
Sbjct 83 ATAACGTATATTATAAAATGTAAAAAATGT 55

Score = 54.7 bits (29), Expect = 0.17  
Identities = 29/29 (100%), Gaps = 0/29 (0%)  
Strand=Plus/Plus

Query 70867 ATAACGTATATTATAAAATGTAAAAAATGT 70895  
|||||  
Sbjct 394 ATAACGTATATTATAAAATGTAAAAAATGT 422

>ERR906885.428722 M02084:91:000000000-A7W9J:1:1106:12479:8491 length=500  
Length=500

Score = 54.7 bits (29), Expect = 0.17  
Identities = 29/29 (100%), Gaps = 0/29 (0%)  
Strand=Plus/Minus

Query 70867 ATAACGTATATTATAAAATGTAAAAAATGT 70895  
|||||  
Sbjct 417 ATAACGTATATTATAAAATGTAAAAAATGT 389

>ERR906885.392433 M02084:91:000000000-A7W9J:1:1105:6027:21122 length=500  
Length=500

Score = 54.7 bits (29), Expect = 0.17  
Identities = 29/29 (100%), Gaps = 0/29 (0%)  
Strand=Plus/Plus

Query 70867 ATAACGTATATTATAAAATGTAAAAAATGT 70895  
|||||  
Sbjct 4 ATAACGTATATTATAAAATGTAAAAAATGT 32

Score = 54.7 bits (29), Expect = 0.17  
Identities = 29/29 (100%), Gaps = 0/29 (0%)

Strand=Plus/Minus

Query 70867 ATAACGTATATTATAAAATGTAAAAAATGT 70895  
|||||  
Sbjct 482 ATAACGTATATTATAAAATGTAAAAAATGT 454

>ERR906885.343180 M02084:91:000000000-A7W9J:1:1105:10075:7527 length=500  
Length=500

Score = 54.7 bits (29), Expect = 0.17  
Identities = 29/29 (100%), Gaps = 0/29 (0%)  
Strand=Plus/Plus

Query 70867 ATAACGTATATTATAAAATGTAAAAAATGT 70895  
|||||  
Sbjct 9 ATAACGTATATTATAAAATGTAAAAAATGT 37

Score = 54.7 bits (29), Expect = 0.17  
Identities = 29/29 (100%), Gaps = 0/29 (0%)  
Strand=Plus/Minus

Query 70867 ATAACGTATATTATAAAATGTAAAAAATGT 70895  
|||||  
Sbjct 392 ATAACGTATATTATAAAATGTAAAAAATGT 364

>ERR906885.238296 M02084:91:000000000-A7W9J:1:1103:7132:24731 length=500  
Length=500

Score = 54.7 bits (29), Expect = 0.17  
Identities = 29/29 (100%), Gaps = 0/29 (0%)  
Strand=Plus/Minus

Query 70867 ATAACGTATATTATAAAATGTAAAAAATGT 70895  
|||||  
Sbjct 218 ATAACGTATATTATAAAATGTAAAAAATGT 190

Score = 54.7 bits (29), Expect = 0.17  
Identities = 29/29 (100%), Gaps = 0/29 (0%)  
Strand=Plus/Plus

Query 70867 ATAACGTATATTATAAAATGTAAAAAATGT 70895  
|||||  
Sbjct 338 ATAACGTATATTATAAAATGTAAAAAATGT 366

>ERR906885.234443 M02084:91:000000000-A7W9J:1:1103:25222:23417 length=500  
Length=500

Score = 54.7 bits (29), Expect = 0.17  
Identities = 29/29 (100%), Gaps = 0/29 (0%)  
Strand=Plus/Plus

Query 70867 ATAACGTATATTATAAAATGTAAAAAATGT 70895  
|||||  
Sbjct 86 ATAACGTATATTATAAAATGTAAAAAATGT 114



>ERR906885.182286 M02084:91:000000000-A7W9J:1:1103:13366:8684 length=500  
Length=500

Score = 54.7 bits (29), Expect = 0.17  
Identities = 29/29 (100%), Gaps = 0/29 (0%)  
Strand=Plus/Plus

```
Query 70867 ATAACGTATATTATAAAATGTAAAAAATGT 70895
          |||
Sbjct 156 ATAACGTATATTATAAAATGTAAAAAATGT 184
```

Score = 54.7 bits (29), Expect = 0.17  
Identities = 29/29 (100%), Gaps = 0/29 (0%)  
Strand=Plus/Minus

```
Query 70867 ATAACGTATATTATAAAATGTAAAAAATGT 70895
          |||
Sbjct 420 ATAACGTATATTATAAAATGTAAAAAATGT 392
```

>ERR906885.79644 M02084:91:000000000-A7W9J:1:1101:16781:27216 length=500  
Length=500

Score = 54.7 bits (29), Expect = 0.17  
Identities = 29/29 (100%), Gaps = 0/29 (0%)  
Strand=Plus/Minus

```
Query 70867 ATAACGTATATTATAAAATGTAAAAAATGT 70895
          |||
Sbjct 218 ATAACGTATATTATAAAATGTAAAAAATGT 190
```

>ERR906885.2018374 M02084:91:000000000-A7W9J:1:2111:20336:17036 length=500  
Length=500

Score = 52.8 bits (28), Expect = 0.61  
Identities = 28/28 (100%), Gaps = 0/28 (0%)  
Strand=Plus/Minus

```
Query 70867 ATAACGTATATTATAAAATGTAAAAAATG 70894
          |||
Sbjct 278 ATAACGTATATTATAAAATGTAAAAAATG 251
```

|        |       |      |
|--------|-------|------|
| Lambda | K     | H    |
| 1.33   | 0.621 | 1.12 |

|        |       |       |
|--------|-------|-------|
| Gapped |       |       |
| Lambda | K     | H     |
| 1.28   | 0.460 | 0.850 |

Effective search space used: 4842319169394876

## 5- Human herpesvirus 7

Query= NC\_001716.2 Human herpesvirus 7, complete genome

Length=153080

\*\*\*\*\* No hits found \*\*\*\*\*

|        |       |      |
|--------|-------|------|
| Lambda | K     | H    |
| 1.33   | 0.621 | 1.12 |

Gapped

|        |       |       |
|--------|-------|-------|
| Lambda | K     | H     |
| 1.28   | 0.460 | 0.850 |

Effective search space used: 5302698799342854

## 6- Human parechovirus 1 isolate CAU10-NN

Query= JX575746.1 Human parechovirus 1 isolate CAU10-NN, complete genome

Length=7348

\*\*\*\*\* No hits found \*\*\*\*\*

|        |       |      |
|--------|-------|------|
| Lambda | K     | H    |
| 1.33   | 0.621 | 1.12 |

Gapped

|        |       |       |
|--------|-------|-------|
| Lambda | K     | H     |
| 1.28   | 0.460 | 0.850 |

Effective search space used: 255585825938430

Database: /n/data1/joslin/cores/bbcore/emrah\_virome/PRJEB9524/fasta/gut\_microb  
iome\_reads.fasta

Posted date: Sep 29, 2017 3:42 PM

Number of letters in database: 37,580,127,000

Number of sequences in database: 75,160,254

Matrix: blastn matrix 1 -2

Gap Penalties: Existence: 0, Extension: 2.5

BLASTN 2.6.0+

Reference: Zheng Zhang, Scott Schwartz, Lukas Wagner, and Webb  
Miller (2000), "A greedy algorithm for aligning DNA sequences", J  
Comput Biol 2000; 7(1-2):203-14.

Database: /n/data1/joslin/cores/bbcore/emrah\_virome/PRJEB9524/fasta/gut\_microb  
iome\_reads.fasta  
75,160,254 sequences; 37,580,127,000 total letters

**The full length reads that gave a significant hit for GIV are reported below:**

>ERR906905.742751 M02084:90:000000000-A7T3A:1:2110:20426:18954 length=500  
GGATACTGCGCCCGTGTGCTGAGTTACTGAGATGAGCCAGCCCTGCAGCTGTGCTCAGCCTGCCCCATCCCCTGCTGATT  
TGCCTGTTCTTAGAGCACAGCCCCCTGCCCTGAAGACTTCTTATAGGCTGGCCACACCCGGTGCAGGAGTCAGCCCCAGT  
CAGGACACAGCACGGACGTGAGGGCCCCACTCAGCTCCTGGGGCTCCTGGGGCTCCTGGGGCTCTGGCTGCCAGGTAAG  
GAAGGAACTCCCTGAAGCTCCAGACAGTACTGAGCACACTGACCGAGTATAATCCTAGTGTCTCCTTCCCTTACCTGG  
CAGCCAGAGCCCCAGGAGCCCCAGGAGCCCCAGCAGCTGAGCGGGGGCCCTCACGTCCGTGCTGTGTCTGACTGGGGCT  
GACTCCTGACCCGGGCGTGGCCAGCCTATAAGAAGTCTTCAGGGCAGGGTGCTGTGCTCCAGGAACAGGC AAAATCAGCAG  
GGGATGGGGCACGCTGACCC

>ERR906885.2244768 M02084:91:000000000-A7W9J:1:2114:17207:13415 length=500  
GAGTTGTTATTAGATTTTTCTATAAGTTTCACAATCGTAGTCATTATTGTCTTAACTGTGAGTTTTATCATCAGGTTGCGT  
ACAAAACCTCAGCTTGTTTTTTTTTTAAATCTGCCTGAATAGTCAGCATCTTGTCTGTACATTTTTTACATTTATAATATA  
CGTTATCGTTCTTGTACCCTTACGATTTTTTACATGACCACATGCGTAGTAACCTGTGCGCAAATCCCATTTCCAATAACT  
GTTGCCAATAGTATGGAATGAAAATAAATTTTTAAAGCAAAAAAAGGAGGCTTCTATGAAAAAGAAGATTATTATG  
GGACTGTTTGTATTGGCAACAGTTATTGGAATGGGATTTGCGACAAGTTACTACGCATGTGGTCATGTAAAAAATCGTAA  
CGTAAACAAGAACGATAACGTATATTATAAATGTAAAAAATGTACAGAACAAGATGCTGACTATTCAGGCAGATTTAAAA  
AAAAACAAGCTGAGGTTTTGT

>ERR906885.2203683 M02084:91:000000000-A7W9J:1:2113:24533:24731 length=500  
GCATGTGGTCATGTAAAAAATCGTAACGGTAACAAGAACGATAACGTATATTATAAATGTAAAAAATGTACAGAACAAGA  
TGCTGACTATTCAGGCAGATTTAAAAAACAAGCTGAGGTTTGTACGCAACCTGATGATAAACTCACAGTTAAGGACA  
ATAATGACTACGATTTGTGAACTTATAGAAAACTAATAACAACCTCTAATAAATATAAATATTTATGGTAAAGTTTTGAAA  
TATAACATTTAAGCTAAGAAAATGTTATATTTCAAACTTTACCATAATATTTTAATTAGTTAGAGTTGTTATTAGATTTT  
CTATAAGTTTCACAATCGTAGTCATTATTGTCTTAACTGTGAGTTTTATCATCAGGTTGCGTACAAAACCTCAGCTTGT  
TTTTTAAATCTGCCTGAATAGTCAGCATCTTGTCTGTACATTTTTTACATTTATAATATACGTTATCGTTCTTGTGTAC  
CGTTACGATTTTTTACATGA

>ERR906885.1850226 M02084:91:000000000-A7W9J:1:2109:25426:14398 length=500  
CACCATTACCGCCAGTCATATAGACTTTACCAGAATATTTAGGAAAAGATTCTTCAAATTTCTTTAATTTGCATTATATACA  
ACAGAATTCGCTTTTTTGGAGAAAATATTGGAAAATACCGAAAATAAAAAATAAATGTGAAAATATTAGTAATTTTTTTCATATA  
TGTAACAACAAAAAGGTAAGCTAAGAAAATGTTATATTTCAAACTTTACCATAATATTTTAATTAGTTAGAGTTGTTATT  
AGATTTTCTAGTCATGTAAAAAATCGTAACGGTAACAAGAACGATAACGTATATTATAAATGTAAAAAATGTACAGAACA  
AGATGCTGACTATTCAGGCAGATTTAAAAAACAAGCTGAGGTTTGTACGCAACCTGATGATAAACTCACAGTTAAGG  
ACAATAATGACTACGATTTGTGAACTTATAGAAAATCTAATAACAACCTCTAATAAATATAAATATTTATGGTAAAGTTTTG  
AAATATAACATTTCTTAGCT

>ERR906885.1828124 M02084:91:000000000-A7W9J:1:2109:13171:8089 length=500  
AATTAGTTAGAGTTGTTATTAGATTTTCTATAAGTTTCACAATCGTAGTCATTATTGTCTTAACTGTGAGTTTATCATC  
AGGTTGCGTACAAAACCTCAGCTTGTTTTTTTTTTAAATCTGCCTGAATAGTCAGCATCTTGTCTGTACATTTTTTACATT  
TATAATATACGTTATCGTTCTTGTACCCTTACGATTTTTTACATGACCACATGCGTAGTAACTTGTGCGCAAATCCCATT  
CCAATAACTGGATGCGATGGAACCTGGACGAATAGATTGCCGTTCTTGCAACGGAATGGGATATTTTGGCGGGTAATTCAC  
TTCCGTATGGAATGAAAATAAATTTTTAAAGCAAAAAAAGGAGGCTTCTATGAAAAAGAAGATTATTATGGGACTG  
TTTGTATTGGCAACAGTTATTGGAATGGGATTTGCGACAAGTTACTACGCATGTGGTCATGTAAAAAATCGTAACGGTAA  
CAAGAACGATAACGTATATT

>ERR906885.1819688 M02084:91:000000000-A7W9J:1:2109:18814:5163 length=500  
TTATATTTCAAACCTTACCATAATATTTAATTAGTTAGAGTTGTTATTAGATTTTCTATAAGTTTCACAATCGTAGTC  
ATTATTGTCTTAACTGTGAGTTTATCATCAGGTTGCGTACAAACCTCAGCTTGTTTTTTTTTTAAATCTGCCTGAATAGT  
CAGCATCTTGTCTGTACATTTTTTACATTTATAATATACGTTATCGTTCTTGTACCCTTACGATTTTTTACATGACCA  
CATGCGTAGTAGATGCGATGGAACCTGGACGAATAGATTGCCGTTCTTGCAACGGAATGGGATATTTTGGCGGGAAATTC  
CTTCCGTATGGAATGAAAATAAATTTTTAAAGCAAAAAAAGGAGGCTTCTATGAAAAAGAAGATTATTATGGGACTG  
GTTTGTATTGGCAACAGTTATTGGAATGGGATTTGCGACAAGTTACTACGCATGTGGTCATGTAAAAAATCGTAACGGTAA  
ACAAGAACGATAACGTATATT

>ERR906885.1682157 M02084:91:000000000-A7W9J:1:2107:23505:11935 length=500  
TTCCGTATGGAATGAAAATAAATTTTTAAAGCAAAAAAAGGAGGCTTCTATGAAAAAGAAGATTATTATGGGACTG  
TTTGTATTGGCAACAGTTATTGGAATGGGATTTGCGACAAGTTACTACGCATGTGGTCATGTAAAAAATCGTAACGGTAA  
CAAGAACGATAACGTATATTATAAATGTAAAAAATGTACAGAACAAGATGCTGACTATTCAGGCAGATTTAAAAAACA  
AAGCTGAGGTAATAATGTGAAAATATTAGTAATTTTTTTCATATATGTAACAACAAAAAGGTAAGCTAAGAAAATGTTAT  
ATTTCAAACCTTACCATAATATTTAATTAGTTAGAGTTGTTATTAGATTTTCTATAAGTTTCACAATCGTAGTCATTA

TTGTCCTTAACTGTGAGTTTATCATCAGGTTGCGTACAAAACCTCAGCTTGTFTTTTTTTTTTAAATCTGCCTGAATAGTCAGC  
ATCTTGTCTGTACATTTTT  
>ERR906885.1649071 M02084:91:000000000-A7W9J:1:2106:16306:25589 length=500  
GTTAGAGTTGTTATTAGATTTTCTATAAGTTTCACAATCGTAGTCATTATTGTCTTAACTGTGAGTTTATCATCAGGTT  
GCGTACAAAACCTCAGCTTGTFTTTTTTTTTTAAATCTGCCTGAATAGTCAGCATCTTGTCTGTACATTTTTTACATTTATAA  
TATACGTTATCGTTCTTGTACCCTTACGATTTTTTACATGACCACATGCGTAGTAACCTGTGCGAAATCCCATTTCCAAT  
AACTGTTGCCATTTTGGCGGGAAATTCACCTCCGTATGGAATTGAAAATAAATTTTTTAAAGACAAAAAAGGAGGTCTT  
CTATGAAAAAGAAGATTATTATGGGACTGTTTGTATTGGCAACAGTTATTGGAATGGGATTTGCGACAAGTTACTACGCA  
TGTGGTCATGTAAAAAATCGTAACGGTAACAAGCAGATAACGTATATTATAAATGTAAAAAATGTACAGAACAAGATGC  
TACTATTTCAGGCAGATTTA  
>ERR906885.1470376 M02084:91:000000000-A7W9J:1:2104:23038:17943 length=500  
AAATGTTATATTTCAAACTTTACCATAATATTTTAATTAGTTAGAGTTGTTATTAGATTTTCTATAAGTTTCACAATCG  
TAGTCATTATTGTCTTAACTGTGAGTTTATCATCAGGTTGCGTACAAAACCTCAGCTTGTFTTTTTTTTTTAAATCTGCCTGA  
ATAGTCAGCATCTTGTCTGTACATTTTTTACATTTATAATATACGTTATCGTTCTTGTACCCTTACGATTTTTTACAT  
GACCACATGCTGGGATATTTTGGCGGGTAATTCACCTCCGTATGGAATTGAAAATAAATTTTTTAAAGACAAAAAAGGA  
GGTCTTCTATGAAAAAGAAGATTATTATGGGACTGTTTGTATTGGCAACAGTTATTGGAATGGGATTTGCGACAAGTTAC  
TACGCATGTGGTCATGTAAAAAATCGTAACGGTAACAAGAACGATAACGTATATTATAAATGTAAAAAATGTACAGAACA  
AGATGCTGACTATTTCAGGCA  
>ERR906885.1205856 M02084:91:000000000-A7W9J:1:2101:10413:8955 length=500  
AAAAATAAAAAATATAATGTGAAATATTAGTAATTTTTTTCATATATGTAACAAAAAAGGTAAGCTAAGAAATGTTATATT  
TCAAACTTTACCATAATATTTTAATTAGTTAGAGTTGTTATTAGATTTTCTATAAGTTTCACAATCGTAGTCATTATTG  
TCCTTAACTGTGAGTTTATCATCAGGTTGCGTACAAAACCTCAGCTTGTFTTTTTTTTTTAAATCTGCCTGAATAGTCAGCATC  
TTGTTCTGTAAAAATAAATTTTTTAAAGACAAAAAAGGAGGTCTTCTATGAAAAAGAAGATTATTATGGGACTGTTTGT  
ATTGGCAACAGTTATTGGAATGGGATTTGCGACAAGTTACTACGCATGTGGTCATGTAAAAAATCGTAACGGTAACAAGA  
ACGATAACGTATATTATAAATGTAAAAAATGTACAGAACAAGATGCTGACTATTTCAGGCAGATTTAAAAAACAAGCT  
GAGGTTTGTACGCAACCTGA  
>ERR906885.953376 M02084:91:000000000-A7W9J:1:1112:15459:10728 length=500  
GTGAGTTTATCATCAGGTTGCGTACAAAACCTCAGCTTGTFTTTTTTTTTTAAATCTGCCTGAATAGTCAGCATCTTGTCTGT  
ACATTTTTTACATTTATAATATACGTTATCGTTCTTGTACCCTTACGATTTTTTACATGACCACATGCGTAAGATCGGA  
AGAGCACACGTCTGAACTCCAGTCACGTCCGCACATCTCGTATGCCGTCTTCTGCTTGAACAAAAAACAACATCTTTC  
TCACCCCTCTACGCATGTGGTCATGTAAAAAATCGTAACGGTAACAAGAACGATAACGTATATTATAAATGTAAAAAAT  
GTACAGAACAAGATGCTGACTATTTCAGGCAGATTTAAAAAACAAGCTGAGGTTTGTACGCAACCTGATGATAAACTC  
ACAGATCGGAAGAGCGTGTAGGAAAGAGTGTAGATCTCGGTGGTCGCCGTATCATTTAAAAAACAAGAACTA  
CATATTGATGTAGCCGACCA  
>ERR906885.826463 M02084:91:000000000-A7W9J:1:1110:20305:22825 length=500  
AATGAACTCCATTTGTTTTTCCCAAGTTCTTTCACCATTACCGCCAGTCATATAGACTTTACCAGAATATTTAGGAAAAAG  
ATTCTTCAAATTTCTTAAATTCGATTATATACAACAGAAATTCGCTTTTTTGGAGAAAAATTTGGAAATACCGAAAAATAAAAAAT  
ATAATGTGAAATATTAGTAATTTTTTTCATATATGTAACAAAAAAGGTAAGCTAAGAAATGTTATATTTCAAAACTTTA  
CCATAATATTGTAAAAAATCGTAACGGTAACAAGAACGATAACGTATATTATAAATGTAAAAAATGTACAGAACAAGATG  
CTGACTATTTCAGGCAGATTTAAAAAACAAGCTGAGGTTTGTACGCAACCTGATGATAAACTCACAGTTAAGGACAAT  
AATGACTACGATTTGTGAACTTTATAGAAAAATCTAATAACAACCTCTAATAAATAAATATTATGGTAAAGTTTTGAAATA  
TAACATTTCTTAGCTTTACC  
>ERR906885.727798 M02084:91:000000000-A7W9J:1:1109:16955:19655 length=500  
TGGAAATACCGAAAAATAAAAAATATAATGTGAAATATTAGTAATTTTTTTCATATATGTAACAAAAAAGGTAAGCTAAGA  
AATGTTATATTTCAAAACTTTACCATAATATTTTAAATTAGTTAGAGTTGTTATTAGATTTTCTATAAGTTTTCACAATCGT  
AGTCATTATTGTCTTAACTGTGAGTTTATCATCAGGTTGCGTACAAAACCTCAGCTTGTFTTTTTTTTTTAAATCTGCCTGAA  
TAGTCAGCATCGATAACGTATATTATAAATGTAAAAAATGTACAGAACAAGATGCTGACTATTTCAGGCAGATTTAAAAA  
AAACAAGCTGAGGTTTGTACGCAACCTGATGATAAACTCACAGTTAAGGACAATAATGACTACGATTTGTGAACTTATAG  
AAAATCTAATAACAACCTCTAATAAATAAATATTATGGTAAAGTTTTGAAATATAACATTTCTTAGCTTTACCTTTTTT  
TGTTACATATATGAAAAAT  
>ERR906885.636438 M02084:91:000000000-A7W9J:1:1108:25604:18310 length=500  
AAAAATCGTAACGGTAACAAGAACGATAACGTATATTATAAATGTAAAAAATGTACAGAACAAGATGCTGACTATTTCAGG  
CAGATTTAAAAAACAAGCTGAGGTTTGTACGCAACCTGATGATAAACTCACAGTTAAGGACAATAATGACTACGATTT  
GTGAACTTATAGAAAAATCTAATAACAACCTCTAATAAATAAATATTATGGTAAAGATCGGAAGAGCACACGTCTGAA  
CTCCAGTCACCTTTACCATAATATTTTAAATTAGTTAGAGTTGTTATTAGATTTTCTATAAGTTTTCACAATCGTAGTCATTA  
TTGTCTTAACTGTGAGTTTATCATCAGGTTGCGTACAAAACCTCAGCTTGTFTTTTTTTTTTAAATCTGCCTGAATAGTCAGC  
ATCTTGTCTGTACATTTTTTACATTTATAATATACGTTATCGTTCTTGTACCCTTACGATTTTTTAGATCGGAAGAGCG  
TCGTGTAGGAAAGAGTGT  
>ERR906885.530816 M02084:91:000000000-A7W9J:1:1107:25356:13148 length=500

ATTGTCCTTAACTGTGAGTTTATCATCAGGTTGCGTACAAAACCTCAGCTTGTTTTTTTTTTAAATCTGCCTGAATAGTCAG  
CATCTTGTCTGTACATTTTTTACATTTATAATATACGTTATCGTTCTTTTTTACCCTTACGATTTTTTACATGACCACAT  
GCGTAGTAACTTGTGCGAAAATCCCATTTCCAATAACTGTTGCCAATACAAAACAGTCCCATAATAATCTTCTTTTTTCATAGA  
AGACCTCCTTATTTTTTAAAGACAAAAAAAAGGAGGTCTTCTATGAAAAAGAAGATTATTATGGGACTGTTTGTATTGGCA  
ACAGTTATTGGAATGGGATTTGCGACAAGTTACTACGCATGTGGTCATGTAAAAAATCGTAACGGTAACAAGAACGATAA  
CGTATATTATAAATGTAAAAAATGTACAGAACAAGATGCTGACTATTCAGGCAGATTTAAAAAAAACAAGCTGAGGTTT  
GTACGCAACCTGATGATAAA

>ERR906885.440867 M02084:91:000000000-A7W9J:1:1106:11143:11898 length=500  
AACCTCAGCTTGTTTTTTTTTTAAATCTGCCTGAATAGTCAGCATCTTGTCTGTACATTTTTTACATTTATAATATACGTT  
TATCGTTCTTGTACCCTTACGATTTTTTACATGACCACATGCGTAGTAACTTGTGCGAAAATCCCATTTCCAATAACTGTT  
GCCAATACAAAACAGTCCCATAATAATCTTCTTTTTTTCATAGAAAGACCTCCTTTTTTACATTCATTCCGAGATCGGAAGAGCA  
CACGTCTGAACGGAATGAATGTGAAAAAGGAGGTCTTCTATGAAAAAGAAGATTATTATGGGACTGTTTGTATTGGCAACA  
GTTATTGGAATGGGATTTGCGACAAGTTACTACGCATGTGGTCATGTAAAAAATCGTAACGGTAACAAGAACGATAACGTT  
ATATTATAAATGTAAAAAATGTACAGAACAAGATGCTGACTATTCAGGCAGATTTAAAAAAAACAAGCTGAGGTTAGAT  
CGGAAGAGCGTCTGTAGGG

>ERR906885.428722 M02084:91:000000000-A7W9J:1:1106:12479:8491 length=500  
GATGGAACCTGGACGAATAGATTGCCGTTCTTGAACGGAATGGGATATTTTTGGCGGGTAACTCACTTCCGTATGGAATTG  
AAAAATAAATTTTTTAAAGACAAAAAAAAGGAGGTCTTCTATGAAAAAGAAGATTATTATGGGACTGTTTGTATTGGCAACA  
GTTATTGGAATGGGATTTGCGACAAGTTACTACGCATGTGGTCATGTAAAAAATCGTAACGGTAACAAGAACGATAACGTT  
ATATTATAAAGAGTTGTTATTAGATTTTTCTATAAGTTTCAACAATCGTAGTCATTATTGTCTTAACTGTGAGTTTATCA  
TCAGGTTGCGTACAAAACCTCAGCTTGTTTTTTTTTTAAATCTGCCTGAATAGTCAGCATCTTGTCTGTACATTTTTTACA  
TTTATAATATACGTTATCGTTCTTGTACCCTTACGATTTTTTACATGACCACATGCGTAGTAACTTGTGCGAAAATCCCA  
TTCCAATAACTGTTGCCAAT

>ERR906885.392433 M02084:91:000000000-A7W9J:1:1105:6027:21122 length=500  
ACGATAACGTATATTTATAAATGTAAAAAATGTACAGAACAAGATGCTGACTATTCAGGCAGATTTAAAAAAAACAAGCT  
GAGGTTTGTACGCAACCTGATGATAAACTCACAGTTAAGGACAATAATGACTACGATTTGTGAAACTTATAGAAAATCTAA  
TAACAACCTCTAACTAATTTAAAAATATTATGGTAAAGTTTTTGAATAATAACATTTCTTAGCTTTACCTTTTTTTTGTAGATC  
GGAAAGAGCACAAACAAAAAAGGTAAGGCTAAGAAAATGTTATATTTCAAAAACCTTACCATAATATTTTTAATTAGTTAGAGT  
TGTTATTAGATTTTTCTATAAGTTTCAACAATCGTAGTCATTATTGTCTTAACTGTGAGTTTATCATCAGGTTGCGTACAA  
ACCTCAGCTTGTTTTTTTTTTAAATCTGCCTGAATAGTCAGCATCTTGTCTGTACATTTTTTACATTTATAATATACGTT  
ATCGTAGATCGGAAGAGCGT

>ERR906885.343180 M02084:91:000000000-A7W9J:1:1105:10075:7527 length=500  
CAAGAACGATAACGTATATTTATAAATGTAAAAAATGTACAGAACAAGATGCTGACTATTCAGGCAGATTTAAAAAAAACA  
AAGACTGATAAAAACCAACAATTTCTTTTTTTCATCAAGAAAGCAAACATAGCAAAACCCACAAGAATTTTTTATAGATCGGAAG  
AGCACACGTCTGAACTCCAGTCACGTCCGCACATCTCGTATGCCGTCCTTCTGCTTGAAAAAAGAAATTTGTTGGGTTTTATCAGTCTT  
CACCACAAGAAAAAATTTCTTGTGGGTTTTGCTATGTTTCTTCTTGTGAAAAAGAATTTGTTGGGTTTTATCAGTCTT  
GTTTTTTTTTAAATCTGCCTGAATAGTCAGCATCTTGTCTGTACATTTTTTACATTTATAATATACGTTATCGTTCTTGT  
AGATCGGAAGAGCGTCTGTAGGGAAAAGAGTGATAGATCTCGGTGGTGCCTGATCATTTAAAAAAAACAAGCGATGTGAT  
AAGGATACGCGCAGGGTAAG

>ERR906885.238296 M02084:91:000000000-A7W9J:1:1103:7132:24731 length=500  
AAGCTAAGAAAATGTTATATTTCAAAAACCTTACCATAATATTTTTAATTAGTTAGAGTTGTTATTAGATTTTTCTATAAGTTT  
CACAATCGTAGTCATTATTGTCTTAACTGTGAGTTTATCATCAGGTTGCGTACAAAACCTCAGCTTGTTTTTTTTTTAAAT  
CTGCCTGAATAGTCAGCATCTTGTCTGTACATTTTTTACATTTATAATATACGTTATCGTTCTTGTACCCTTACGATTT  
TTTTACATGATTTGATTGGCAACAGTTATTGGAATGGGATTTGCGACAAGTTACTACGCATGTGGTCATGTAAAAAATCG  
TAACGGTAACAAGAACGATAACGTATATTATAAATGTAAAAAATGTACAGAACAAGATGCTGACTATTCAGGCAGATTTA  
AAAAAAAACAAGCTGAGGTTTGTACGCAACCTGATGATAAACTCACAGTTAAGGACAATAATGACTACGATTTGTGAAACT  
TATAGAAAATCTAATAACAA

>ERR906885.234443 M02084:91:000000000-A7W9J:1:1103:25222:23417 length=500  
GTATTGGCAACAGTTATTGGAATGGGATTTGCGACAAGTTACTACGCATGTGGTCATGTAAAAAATCGTAACGGTAACAA  
GAACGATAACGTATATTTATAAATGTAAAAAATGTACAGAACAAGTCAGTTAAATCGACACCAAAAATAATCCTTAAATTT  
TTTGAATTCAAAATTTTATAACCAAAAACCTCTGAAAAGTATTAGGAAGATCAATATTAGTTCCATATTTTTTATTAAAGGCT  
ATTAACAAGTAGGGCTGTGGATGCTGGAACCTATATAAGGAAAATGAAATTTATAAGAGATGCTTTTAAACAATAATGATT  
CAGAAAAAGCCTTTAATTTAATGGGTATATACAGTAAACGATACTTTTCTACACTTGTTAATAGCCTTAATAAAAAATAT  
GGAACATAATATTGATCTTCCATAACTTTCCAGAGTTTTGGTTATGAAAATTTTGAATTCAAAAAATTTAAGGATTTATTTT  
TGGTGTGATTTAACTGACT

>ERR906885.182286 M02084:91:000000000-A7W9J:1:1103:13366:8684 length=500  
TGAAAAATAAATTTTTTAAAGACAAAAAAAAGGAGGTCTTCTATGAAAAAGAAGATTATTATGGGACTGTTTGTATTGGCAA  
CAGTTATTGGAATGGGATTTGCGACAAGTTACTACGCATGTGGTCATGTAAAAAATCGTAACGGTAACAAGAACGATAAC  
GTATATTATAAATGTAAAAAATGTACAGAACAAGATGCTGACTATTCAGGCAGATTTAAAAAAAACAAGCTGAGGTTTGT

TACGCAACCTGTTAGAGTTGTTATTAGATTTTTCTATAAGTTTCACAATCGTAGTCATTATTGTCCTTAACTGTGAGTTTAT  
TCATCAGGTTGCGTACAAAACCTCAGCTTGTTTTTTTTTAAATCTGCCTGAATAGTCAGCATCTTGTTCTGTACATTTTTTT  
ACATTTATAATATACGTTATCGTTCTTGTTACCGTTACGATTTTTTACATGACCACATGCGTAGTAACTTGTTCGCAAATC  
CCATTCCAATAACTGTTGCC

>ERR906885.79644 M02084:91:000000000-A7W9J:1:1101:16781:27216 length=500

AAGCTAAGAAATGTTATATTTCAAACTTTACCATAATATTTTAAATTAGTTAGAGTTGTTATTAGATTTTTCTATAAGTTT  
CACAATCGTAGTCATTATTGTCCTTAACTGTGAGTTTATCATCAGGTTGCGTACAAAACCTCAGCTTGTTTTTTTTTAAAT  
CTGCCTGAATAGTCAGCATCTTGTTCTGTACATTTTTTACATTTATAATATACGTTATCGTTCTTGTTACCGTTACGATT  
TTTTACATGACGAGGCGGGTAATTCACTTCCGTATGGAATTGAAAATAAATTTTTAAAGACAAAAAAAAAGGAGGTCTTCT  
ATGAAAAAGAAGATTATTATGGGACTGTTTGTATTGGCAACAGTTATTGGAATGGGATTTGCGACAAGTTACTACGCATG  
TGGTCATGTAAAAAATCGTAAACGGTAACAAGAACGATAACGTATATTTATAAATGTAAAAAAGTACAGAAAAAGAAGCTG  
ACTATTTAGGCAGATTTAAA

>ERR906885.2018374 M02084:91:000000000-A7W9J:1:2111:20336:17036 length=500

TCATGTGCAGGATTTGGATATAAATATACAAACATTTCTTACAGGCGAAAAAGAAGTCTGCACATTTTGTCTGGCAGTGG  
AAAAAGAACTGCACAAGATGCGATGGAAGTGGACGAATAGATTGCCGTTCTTGCAACGGAATGGGATATTTTGGCGGGT  
AATTCACTTCCGTATGGAATTGAAAATAAATTTTTAAAGACAAAAAAAAAGGAGGTCTTCTATGAAAAAGAAGATTATTAT  
GGGACTGTTTCATTTTTTACATTTATAATATACGTTATCGTTCTTGTTACCGTTACGATTTTTTACATGACCACATGCGT  
AGTTACTTGTTCGCAAATCCCATTTCCAATAACTGTTGCCAATACAAACAGTCCCATAAATAATCTTCTTTTTTCATAGAAGAC  
CTCCTTTTTTTTTGTCTTTAAAAATTTATTTTTCAATTCATACGGAAGTGAATTACCCGCCAAAAATATCCCATTCGGTTGC  
AAGAACGGCAATCTATTTCGC
