# Supplementary material
Source: PubMed Central journal article supplement (PMC5877943)
Supplement: pnas.1721117115.sd06.pdf [file pnas.1721117115.sd06.pdf]

## Supplementary Dataset 6: Identification of LCDV-1 in human enteric virome.

The data for this analysis was obtained from NCBI (SRA ID: PRJNA196801) and the name of the project is "Rapid evolution of the human gut virome - BioProject". We report the BlastN reads that show a significant alignment with LCDV-1 sequences. No significant hits were identified for LCDV-Sa, GIV and SGIV in this dataset. Human herpes virus and human parechovirus were used as controls. The full length reads that gave a significant hit for GIV are reported at the end of the document. The full length read that gave a significant hit for LCDV-1 is reported at the end of the document.

### 1- LCDV-1

Query= NC\_001824.1 Lymphocystis disease virus 1, complete genome

Length=102653

| Sequences producing significant alignments: | Score (Bits) | E Value |
|---------------------------------------------|--------------|---------|
|---------------------------------------------|--------------|---------|

|                                                                     |      |      |
|---------------------------------------------------------------------|------|------|
| SRR935349.6447861 HWI-ST423:258:COMLUACXX:6:1216:19027:50697 len... | 54.7 | 0.28 |
|---------------------------------------------------------------------|------|------|

>SRR935349.6447861 HWI-ST423:258:COMLUACXX:6:1216:19027:50697 length=202  
Length=202

Score = 54.7 bits (29), Expect = 0.28  
Identities = 34/36 (94%), Gaps = 1/36 (3%)  
Strand=Plus/Minus

```
Query  57275  ATTG-TAATTTAGATTAAATTTAAATTAACCATGC  57309
      |||| | |||||||||||||||||||||||||||
Sbjct  129     ATTGATGATTTAGATTAAATTTAAATTAACCATGC  94
```

|        |       |      |
|--------|-------|------|
| Lambda | K     | H    |
| 1.33   | 0.621 | 1.12 |

Gapped

|        |       |       |
|--------|-------|-------|
| Lambda | K     | H     |
| 1.28   | 0.460 | 0.850 |

Effective search space used: 7966312234334142

### 2- LCDV-Sa

Query= NC\_033423.1 Lymphocystis disease virus Sa isolate SA9, complete genome

Length=208501

\*\*\*\*\* No hits found \*\*\*\*\*

|        |   |   |
|--------|---|---|
| Lambda | K | H |
|--------|---|---|

1.33 0.621 1.12

Gapped

Lambda K H  
1.28 0.460 0.850

Effective search space used: 16084328486396742

### 3- SGIV

Query= NC\_006549.1 Singapore grouper iridovirus, complete genome

Length=140131

\*\*\*\*\* No hits found \*\*\*\*\*

Lambda K H  
1.33 0.621 1.12

Gapped

Lambda K H  
1.28 0.460 0.850

Effective search space used: 10809070579090602

### 4- GIV

Query= AY666015.1 Grouper iridovirus, complete genome

Length=139793

\*\*\*\*\* No hits found \*\*\*\*\*

Lambda K H  
1.33 0.621 1.12

Gapped

Lambda K H  
1.28 0.460 0.850

Effective search space used: 10782991345908366

### 5- Human herpesvirus 7

Query= NC\_001716.2 Human herpesvirus 7, complete genome

Length=153080

\*\*\*\*\* No hits found \*\*\*\*\*

Lambda        K        H  
      1.33     0.621     1.12

Gapped

Lambda        K        H  
      1.28     0.460     0.850

Effective search space used: 11808182976950880

## 6- Human parechovirus 1

Query= JX575746.1 Human parechovirus 1 isolate CAU10-NN, complete genome

Length=7348

**\*\*\*\*\* No hits found \*\*\*\*\***

Lambda        K        H  
      1.33     0.621     1.12

Gapped

Lambda        K        H  
      1.28     0.460     0.850

Effective search space used: 578105862421152

Database: /n/data1/joslin/cores/bbcore/emrah\_virome/PRJNA196801/fasta/gut\_micr  
obiome\_reads.fasta

Posted date: Sep 29, 2017 4:06 PM

Number of letters in database: 96,208,727,862

Number of sequences in database: 476,280,831

Matrix: blastn matrix 1 -2

Gap Penalties: Existence: 0, Extension: 2.5

BLASTN 2.6.0+

Reference: Zheng Zhang, Scott Schwartz, Lukas Wagner, and Webb  
Miller (2000), "A greedy algorithm for aligning DNA sequences", J  
Comput Biol 2000; 7(1-2):203-14.

Database: /n/data1/joslin/cores/bbcore/emrah\_virome/PRJNA196801/fasta/gut\_micr  
obiome\_reads.fasta

476,280,831 sequences; 96,208,727,862 total letters

## The full length read that gave a significant hit for LCDV-1

```
>SRR935349.6447861 HWI-ST423:258:COMLUACXX:6:1216:19027:50697 length=202
ATATGAATGAAATTGCTAGCTTTATCTTAGATTCAGATGTTGCAGGAGGGAGACACATCGCCAAAGCGTTAAATGACCCT
AAGACTTTAGTTGGCATGGTTTAATTTAAATTTAATCTAAATCATCAATTGTTATTACCTTCTTAGCAGGGGCACCCGTA
CTACCTGCTGTTTTTTTGACCACTGTCTTAGCTGCATTTGGA
```
